# Supplementary material for: Functional Changes in Brain Activity Using Hypnosis: A Systematic Review
Source: MDPI journal article supplement (doi:10.3390/brainsci12010108), 2022-01-13
Supplement: s1 [file s1]

## List of excluded papers

| ID | Author             | Year | Sources                                                                                                                          | reason for exclusion |
|----|--------------------|------|----------------------------------------------------------------------------------------------------------------------------------|----------------------|
| 1  | Zuo et al.,        | 2021 | Medicine (Baltimore). 2021 Mar 5; 100(9):e24535                                                                                  |                      |
| 2  | Zhou et al.,       | 2021 | Soc Cogn Affect Neurosci. 2021 May 21; 16(6):621-631                                                                             | non pertinent        |
| 3  | Zhengpeng et al.   | 2021 | Chinese journal of tissue engineering research, 2021; 25(12):1826-1830                                                           | non pertinent        |
| 4  | Zheng et al.,      | 2021 | Pain Med. 2021 Mar 18; 22(3):606-615                                                                                             | non pertinent        |
| 5  | Zhang et al.,      | 2021 | Ann Palliat Med. 2021 May; 10(5):5908-5918                                                                                       | non pertinent        |
| 6  | Zhang et al.,      | 2021 | Reg Anesth Pain Med. 2021 Feb; 46(2):145-150                                                                                     | non pertinent        |
| 7  | Zandonai et al.,   | 2021 | J Sports Sci. 2021 Jul; 39(13):1452-1460                                                                                         | non pertinent        |
| 8  | Zabik et al.,      | 2021 | Biological psychiatry, 2021; 89(9):104-                                                                                          | non pertinent        |
| 9  | Younis et al.,     | 2021 | J Cereb Blood Flow Metab. 2021 Mar; 41(3):604-616                                                                                | non pertinent        |
| 10 | Yang et al.,       | 2021 | Cells, 2021; 10(7)                                                                                                               | non pertinent        |
| 11 | Wu et al.,         | 2021 | Pain management nursing, 2021; <a href="https://doi.org/10.1016/j.pmn.2021.01.004">https://doi.org/10.1016/j.pmn.2021.01.004</a> | non pertinent        |
| 12 | Woodbury et al.,   | 2021 | Pain Med. 2021 Mar 18; 22(3):715-726                                                                                             | non pertinent        |
| 13 | Williamson et al., | 2021 | Health technology assessment, 2021; 25(16):VIII-33                                                                               | non pertinent        |
| 14 | Wilby et al.,      | 2021 | Health technology assessment (Winchester, England), 2021; 25(24):1-86                                                            | non pertinent        |
| 15 | Wijenberg et al.,  | 2021 | J Clin Exp Neuropsychol. 2021 Feb; 43(1):66-77                                                                                   | non pertinent        |
| 16 | Westphal et al.,   | 2021 | Translational psychiatry, 2021; 11(1):389                                                                                        | non pertinent        |
| 17 | Werdyani et al.,   | 2021 | Osteoarthritis and cartilage, 2021; 29:17                                                                                        | non pertinent        |

|    |                        |      |                                                                        |               |
|----|------------------------|------|------------------------------------------------------------------------|---------------|
| 18 | Wei et al.,            | 2021 | BMJ Open. 2021 Aug 16; 11(8):e048093                                   | non pertinent |
| 19 | Wang et al.,           | 2021 | J Orthop Res. 2021 Jul; 39(7):1470-1478                                | non pertinent |
| 20 | Wang et al.,           | 2021 | Frontiers in neuroscience, 2021; 15                                    | non pertinent |
| 21 | Wagatsuma et al.,      | 2021 | Pain management nursing, 2021                                          | non pertinent |
| 22 | Wang et al.,           | 2021 | Zhongahua yi xue za zhi, 2021; 101(21):1592-1597                       | non pertinent |
| 23 | Vogt et al.,           | 2021 | Anesthesiology. 2021 Jul 1; 135(1):69-82                               | non pertinent |
| 24 | Venkatesh et al.,      | 2021 | Am J Emerg Med. 2021 Jan; 39:102-108                                   | non pertinent |
| 25 | Vencatachellum et al., | 2021 | European journal of pain (united kingdom), 2021                        | non pertinent |
| 26 | Vaninetti et al.,      | 2021 | Scientific reports, 2021; 11(1):9573-                                  | non pertinent |
| 27 | Upadhyay et al.,       | 2021 | Journal of perinatology, 2021 BMC                                      | non pertinent |
| 28 | Toyooka et al.,        | 2021 | Musculoskelet Disord. 2021 Mar 18; 22(1):285                           | non pertinent |
| 29 | Tong et al.,           | 2021 | Clin Respir J. 2021 Sep; 15(9):1012-1018                               | non pertinent |
| 30 | Thakkar et al.,        | 2021 | Eur Arch Paediatr Dent. 2021 Jun; 22(3):459-467                        | non pertinent |
| 31 | Thakar et al.,         | 2021 | Indian journal of medical research, supplement, 2021; 153(1-2):151-158 | non pertinent |
| 32 | Tchaconas et al.,      | 2021 | Pediatrics, 2021; 147(3):636-637                                       | non pertinent |
| 33 | Tang et al.,           | 2021 | PLoS One. 2021 Mar 26; 16(3):e0247678                                  | non pertinent |
| 34 | Takami et al.,         | 2021 | Spine J. 2021 Mar; 21(1):446-454                                       | non pertinent |
| 35 | Takahashi et al.,      | 2021 | BMC Musculoskelet Disord. 2021 Feb 11; 22(1):167                       | non pertinent |
| 36 | Taguchi et al.,        | 2021 | Medicine (Baltimore). 2021 Feb 12; 100(6):e23859                       | non pertinent |
| 37 | Sweeney et al.,        | 2021 | Pilot and feasibility studies, 2021; 7(1)                              | non pertinent |

|    |                               |      |                                                                                |               |
|----|-------------------------------|------|--------------------------------------------------------------------------------|---------------|
| 38 | Susano et al.,                | 2021 | Anesth Analg.<br>2021 Mar 1;<br>132(3):846-855                                 | non pertinent |
| 39 | Sun et al.,                   | 2021 | Trials. 2021 Jun<br>14; 22(1):399                                              | non pertinent |
| 40 | Stuepp et al.,                | 2021 | J Oral Maxillofac<br>Surg. 2021<br>May79(5):1025.e1-<br>1025.e8                | non pertinent |
| 41 | Strauss et al.,               | 2021 | Journal of pain,<br>2021                                                       | non pertinent |
| 42 | Steuber                       | 2021 | J Psychiatr Res.<br>2021 Sep; 141:325-<br>332                                  | non pertinent |
| 43 | Srikesavan et al.,            | 2021 | BMJ Open. 2021<br>Jun 11;<br>11(6):e040829                                     | non pertinent |
| 44 | Solaymani-<br>Dodaran et al., | 2021 | International<br>immunopharmacology,<br>2021;<br>95:107522                     | non pertinent |
| 45 | Siper et al.,                 | 2021 | Genes (Basel).<br>2021 Feb 27;<br>12(3):351                                    | non pertinent |
| 46 | Simis et al.,                 | 2021 | Pain medicine<br>(Malden, Mass.),<br>2021                                      | non pertinent |
| 47 | Siddiqi et al.,               | 2021 | Spine deformity,<br>2021; 9(1):13-40                                           | non pertinent |
| 48 | Sheth et al.,                 | 2021 | Clin Rheumatol.<br>2021 Feb;<br>40(2):735-740                                  | non pertinent |
| 49 | Seo et al.,                   | 2021 | Biol Psychiatry<br>Cogn Neurosci<br>Neuroimaging.<br>2021 Mar;<br>6(3):299-309 | non pertinent |
| 50 | Serper et al.,                | 2021 | Liver Int. 2021<br>Apr; 41(4):692-<br>704                                      | non pertinent |
| 51 | Schweda et al.,               | 2021 | Osteoarthritis and<br>cartilage, 2021;<br>29:384-385                           | non pertinent |
| 52 | Schuppan et al.,              | 2021 | New England<br>journal of<br>medicine, 2021;<br>385(1):35-45                   | non pertinent |
| 53 | Schnider et al.,              | 2021 | Clin Pharmacol<br>Ther. 2021 Aug;<br>110(2):401-408                            | non pertinent |
| 54 | Schneider et al.,             | 2021 | Journal of pain,<br>2021; 22(5):605-<br>606                                    | non pertinent |
| 55 | Schmidt et al.,               | 2021 | BMJ Open. 2021<br>Jun 23;<br>11(6):e045969                                     | non pertinent |
| 56 | Schensul et al.,              | 2021 | BMC Oral Health.<br>2021 Jul 21;<br>21(1):362                                  | non pertinent |
| 57 | Schega et al.,                | 2021 | BMC Geriatr.<br>2021 Mar 2;<br>21(1):151                                       | non pertinent |

|    |                         |      |                                                                                                           |               |
|----|-------------------------|------|-----------------------------------------------------------------------------------------------------------|---------------|
| 58 | Sahgal et al.,          | 2021 | Lancet Oncol.<br>2021 Jul;<br>22(7):1023-1033                                                             | non pertinent |
| 59 | Saeedi et al.,          | 2021 | International<br>journal of<br>pharmaceutical<br>research, 2021;<br>13(3):671-684                         | non pertinent |
| 60 | Saadi et al.            | 2021 | PloS one, 2021;<br>16(3)                                                                                  | non pertinent |
| 61 | Russ et al.,            | 2021 | J Back<br>Musculoskelet<br>Rehabil. 2021;<br>34(1):139-147                                                | non pertinent |
| 62 | Rubino et al.,          | 2021 | Obesity facts,<br>2021; 14(1):118-<br>119                                                                 | non pertinent |
| 63 | Rosenberg et al.,       | 2021 | Spine (Phila Pa<br>1976). 2021 Mar<br>15; 46(6):347-355                                                   | non pertinent |
| 64 | Rocha et al.,           | 2021 | Neuroscience<br>letters, 2021;<br>742:135539                                                              | non pertinent |
| 65 | Riva et al.,            | 2021 | Anaesthesia. 2021<br>Jan; 76(1):27-35                                                                     | non pertinent |
| 66 | Riegner et al.,         | 2021 | Journal of pain,<br>2021; 22(5):605-                                                                      | non pertinent |
| 67 | Rengasamy et al.,       | 2021 | Cognitive therapy<br>and research,<br>2021; 45:795-804                                                    | non pertinent |
| 68 | Ren et al.,             | 2021 | Journal of<br>healthcare<br>engineering, 2021;<br>2021                                                    | non pertinent |
| 69 | Rausch et al.,          | 2021 | Military medical<br>research                                                                              | non pertinent |
| 70 | Rasoul et al.,          | 2021 | Clinical medicine,<br>journal of the<br>royal college of<br>physicians of<br>london, 2021;<br>21(2):90-95 | non pertinent |
| 71 | Rao et al.,             | 2021 | Journal of clinical<br>oncology, 2021;<br>39(6)                                                           | non pertinent |
| 72 | Rajasekaran et al.,     | 2021 | Eur Spine J. 2021<br>Jul; 30(7):2069-<br>2081                                                             | non pertinent |
| 73 | Raja et al.,            | 2021 | Trials. 2021 Aug<br>28; 22(1):574                                                                         | non pertinent |
| 74 | Pratscher et al.,       | 2021 | Nutrients. 2021<br>May 5; 13(5):1556                                                                      | non pertinent |
| 75 | Perkins et al.,         | 2021 | Translational<br>psychiatry, 2021;<br>11(1)                                                               | non pertinent |
| 76 | Pérez Duenas et<br>al., | 2021 | Arch<br>Bronconeumol.<br>2021 Jan; 57 Suppl<br>1.:35-46                                                   | non pertinent |
| 77 | Peng et al.,            | 2021 | Journal of shoulder<br>and elbow<br>surgery, 2021                                                         | non pertinent |

|    |                        |      |                                                                     |               |
|----|------------------------|------|---------------------------------------------------------------------|---------------|
| 78 | Pei et al.,            | 2021 | Medicine, 2021; 100(19):e25948                                      | non pertinent |
| 79 | Paulus et al.,         | 2021 | Neuropsychopharmacology. 2021 Apr; 46(5):1011-1019                  | non pertinent |
| 80 | Patel et al.,          | 2021 | PLoS One. 2021 Feb 1; 16(2):e0245827                                | non pertinent |
| 81 | Patel et al.,          | 2021 | JAMA network open, 2021                                             | non pertinent |
| 82 | Pang et al.,           | 2021 | World journal of clinical cases, 2021; 8(14):2942-2949              | non pertinent |
| 83 | Pappolla et al.,       | 2021 | Pain Physician. 2021 Mar; 24(2):175-184                             | non pertinent |
| 84 | Pacini et al.,         | 2021 | Frontiers in pharmacology, 2020; 12                                 | non pertinent |
| 85 | Öztürk et al.,         | 2021 | J Clin Neurosci. 2021 Aug; 90:144-151                               | non pertinent |
| 86 | Oliver-Fornies et al., | 2021 | Trials, 2021; 22(1)                                                 | non pertinent |
| 87 | Oikonomou et al.,      | 2021 | European heart journal, 2021                                        | non pertinent |
| 88 | Obermann et al.,       | 2021 | The lancet. Neurology, 2021; 20(1):29-37                            | non pertinent |
| 89 | Nianjun et al.,        | 2021 | Chinese journal of tissue engineering research, 2021; 25(6):866-872 | non pertinent |
| 90 | Neogi et al.           | 2021 | BJOG, 2021; 128(2):29-30                                            | non pertinent |
| 91 | Naji et al.,           | 2021 | Int J Oral Maxillofac Surg. 2021 May; 50(5):683-690                 | non pertinent |
| 92 | Muthulingam et al.,    | 2021 | Neuromodulation, 2021                                               | non pertinent |
| 93 | Mowafy et al.,         | 2021 | J Anesth. 2021 Aug; 35(4):515-524                                   | non pertinent |
| 94 | Mouraux et al.,        | 2021 | Trials. 2021 Jun 17; 22(1):404                                      | non pertinent |
| 95 | Moerkerke et al.,      | 2021 | European neuropsychopharmacology, 2021; 44:51-52                    | non pertinent |
| 96 | Ming et al.,           | 2021 | Medicine (Baltimore). 2021 Jan 8; 100(1):e23998                     | non pertinent |
| 97 | Mead et al.,           | 2021 | British journal of haematology, 2021; 193(1):96-                    | non pertinent |
| 98 | McPhee et al.,         | 2021 | The journal of pain, 2021                                           | non pertinent |
| 99 | McLarty et al.,        | 2021 | Vet Radiol Ultrasound. 2021 Jul; 62(4):498-506                      | non pertinent |

|     |                      |      |                                                                                    |               |
|-----|----------------------|------|------------------------------------------------------------------------------------|---------------|
| 100 | McLean et al.,       | 2021 | Otol Neurotol.<br>2021 Aug 1;<br>42(7):e849-e857                                   | non pertinent |
| 101 | McHugo et al.,       | 2021 | J Nerv Ment Dis.<br>2021 Feb 1;<br>209(2):92-99                                    | non pertinent |
| 102 | Mawla et al.,        | 2021 | Arthritis<br>Rheumatol. 2021<br>Jul; 73(7):1318-<br>1328                           | non pertinent |
| 103 | Maheu et al.,        | 2021 | Osteoarthritis and<br>cartilage, 2021;<br>29:420-421                               | non pertinent |
| 104 | Ma et al.,           | 2021 | Brain Behav. 2021<br>Apr; 11(4):e02059                                             | non pertinent |
| 105 | Lychagin et al.,     | 2021 | Open access<br>macedonian<br>journal of medical<br>sciences, 2021;<br>9(B):398-402 | non pertinent |
| 106 | Luo et al.,          | 2021 | Journal of<br>orthopaedics and<br>traumatology,<br>2021; 22(1)                     | non pertinent |
| 107 | Lunger et al.,       | 2021 | BMJ open, 2021;<br>11(1)                                                           | non pertinent |
| 108 | Lopes et al.,        | 2021 | European archives<br>of oto-rhino-<br>laryngology, 2021                            | non pertinent |
| 109 | Liu et al.,          | 2021 | Indian journal of<br>pharmaceutical<br>sciences, 2021;<br>83:148-153               | non pertinent |
| 110 | Listik et al.,       | 2021 | Eur J Pain. 2021<br>Jul; 25(6):1355-<br>1366                                       | non pertinent |
| 111 | Lelic et al.,        | 2021 | The journal of<br>pain, 2021                                                       | not pertinent |
| 112 | Legakis et al.,      | 2021 | Ann Palliat Med.<br>2021 Jun;<br>10(6):6336-6343                                   | non pertinent |
| 113 | Lee et al.,          | 2021 | Eur J Pediatr.<br>2021 May;<br>180(5):1413-1422                                    | not pertinent |
| 114 | Lazaro-Navas et al., | 2021 | Int J Environ Res<br>Public Health.<br>2021 Jun 3;<br>18(11):6018                  | not pertinent |
| 115 | Lasocki et al.,      | 2021 | BMJ open, 2021;<br>11(1)                                                           | not pertinent |
| 116 | Lam et al.,          | 2021 | Medicine<br>(Baltimore). 2021<br>Feb 26;<br>100(8):e23718                          | not pertinent |
| 117 | Laird et al.,        | 2021 | Complement Ther<br>Clin Pract. 2021<br>May; 43:101374                              | not pertinent |
| 118 | Kumar et al.,        | 2021 | Neurol Sci. 2021<br>Jan; 42(1):131-139                                             | not pertinent |

|      |                    |      |                                                                    |               |
|------|--------------------|------|--------------------------------------------------------------------|---------------|
| 119  | Korgaonkar et al., | 2021 | Translational psychiatry, 2021; 11(1)                              | not pertinent |
| 120  | Koo et al.,        | 2021 | J Headache Pain. 2021 Apr 20; 22(1):28                             | not pertinent |
| 121  | Komulainen et al., | 2021 | NeuroImage, 2021; 237                                              | not pertinent |
| 122  | Kold et al.,       | 2021 | Pain. 2021 Jun 1; 162(6):1659-1668                                 | not pertinent |
| 123  | Kohnen et al.,     | 2021 | J Adv Nurs. 2021 Jul;77(7):3058-3072                               | not pertinent |
| 124  | Klimas et al.,     | 2021 | Contemporary clinical trials, 2021; 107                            | not pertinent |
| 125  | Kisby et al.,      | 2021 | Alcoholism: clinical and experimental research, 2021; 45(1):103A-  | not pertinent |
| 126  | Kim et al.,        | 2021 | European urology focus, 2021                                       | not pertinent |
| 127  | Kim et al.,        | 2021 | Journal of clinical medicine, 2021; 10(15)                         | not pertinent |
| 128  | Kim et al.,        | 2021 | Journal of personalized medicine, 2021; 11(5)                      | not pertinent |
| 129  | Khong et al.,      | 2021 | Eur J Sport Sci. 2021 Feb; 21(2):224-230                           | not pertinent |
| 130  | Khera et al.,      | 2021 | BMJ open, 2021; 11(3)                                              | not pertinent |
| 1301 | Khanna et al.,     | 2021 | J Assoc Physicians India. 2021 Apr; 69(4):11-12                    | not pertinent |
| 132  | Kerautret et al.,  | 2021 | Brain science, 2021; 11(6)                                         | not pertinent |
| 133  | Kang et al.,       | 2021 | Spine journal, 2021                                                | not pertinent |
| 134  | Kanen et al.,      | 2021 | Biol Psychiatry Cogn Neurosci Neuroimaging. 2021 May; 6(5):590-598 | not pertinent |
| 135  | Kadali et al.,     | 2021 | International journal of infectious diseases, 2021; 106:376-381    | not pertinent |
| 136  | Juraskova et al.,  | 2021 | BMJ Open. 2021 May 28; 11(5):e043224                               | not pertinent |
| 137  | Jones et al.,      | 2021 | J Med Internet Res. 2021 Apr 30; 23(4):e25872                      | not pertinent |
| 138  | Jones et al.,      | 2021 | Eur J Pain. 2021 Jan; 25(1):149-159                                | not pertinent |
| 139  | Jin et al.,        | 2021 | Orthopaedic surgery, 2021                                          | not pertinent |

|     |                             |      |                                                                       |               |
|-----|-----------------------------|------|-----------------------------------------------------------------------|---------------|
| 140 | Jianjian et al.,            | 2021 | Medicine, 2021;<br>100(9):e24535-                                     | not pertinent |
| 141 | Jeon et al.,                | 2021 | Neuro-oncology,<br>practice, 2021;<br>8(1):48-59                      | not pertinent |
| 142 | Jande Beur et al.,          | 2021 | J Bone Miner Res.<br>2021 Apr;<br>36(4):627-635                       | not pertinent |
| 143 | Inose et al.,               | 2021 | Qual Life Res.<br>2021 Jan;<br>30(1):129-135                          | not pertinent |
| 144 | Imseeh et al.,              | 2021 | Int J<br>Hyperthermia.<br>2021; 38(1):623-<br>632                     | not pertinent |
| 145 | Imanishi et al.,            | 2021 | J Bone Miner Res.<br>2021 Feb;<br>36(2):262-270                       | not pertinent |
| 146 | Hyun et al.,                | 2021 | Journal of Korean<br>Neurosurgical<br>Society, 2021;<br>64(4):562-574 | not pertinent |
| 147 | Hurlemann et al.,           | 2021 | Biological<br>psychiatry, 2021;<br>89(9):33-                          | not pertinent |
| 148 | Hofman et al.,              | 2021 | Lancet, 2021;<br>397(10276):797-<br>804                               | not pertinent |
| 149 | Hofman et al.,              | 2021 | Social<br>neuroscience,<br>2021; 16(4):362-<br>374                    | not pertinent |
| 150 | Hernandez-Franco<br>et al., | 2021 | Toxicol, 2021;<br>190:33-                                             | not pertinent |
| 151 | Hedberg et al.,             | 2021 | BMC Oral Health.<br>2021 Jun 9;<br>21(1):297                          | not pertinent |
| 152 | Hebel et al.                | 2021 | Brain stimulation,<br>2021; 14(2):335-<br>343                         | not pertinent |
| 153 | Heapy et al.,               | 2021 | J Behav Med. 2021<br>Apr; 44(2):260-<br>269                           | not pertinent |
| 154 | Hasvik et al.,              | 2021 | Clin Orthop Relat<br>Res. 2021 Apr 1;<br>479(4):651-663               | not pertinent |
| 155 | Harvey et al.,              | 2021 | BMC Pediatr.<br>2021 Aug 28;<br>21(1):368                             | not pertinent |
| 156 | Harvie et al.,              | 2021 | Animal cognition<br>2021; 24(2):239-<br>250                           | not pertinent |
| 157 | Hamadani et al.,            | 2021 | The lancet<br>haematology,<br>2021; 8(6):e433-<br>e445                | not pertinent |
| 158 | Harba et al.,               | 2021 | Dental and<br>medical problems,<br>2021; 58(1):81-88                  | not pertinent |
| 159 | Griffith et al.,            | 2021 | Emerg Radiol.<br>2021 Jun;<br>28(3):485-495                           | not pertinent |



|     |                       |      |                                                                   |               |
|-----|-----------------------|------|-------------------------------------------------------------------|---------------|
| 160 | Gruber et al.,        | 2021 | Exp Clin Psychopharmacol. 2021 Apr; 29(2):147-156                 | not pertinent |
| 161 | Gregoret et al.,      | 2021 | Eur J Pain. 2021 Jul; 25(6):1241-1253                             | not pertinent |
| 162 | Grahl et al.,         | 2021 | Journal of pain, 2021; 22(5):602-                                 | not pertinent |
| 163 | Gikic et al.,         | 2021 | J Oral Rehabil. 2021 Jul; 48(7):785-797                           | not pertinent |
| 164 | Gholami et al.,       | 2021 | Neurophysiologie clinique, 2021; 51(4):319-328                    | not pertinent |
| 165 | Gatti et al.,         | 2021 | Eur J Neurosci. 2021 Jan; 53(2):556-570                           | not pertinent |
| 166 | Garrison et al.,      | 2021 | Cognitive, affective & behavioral neuroscience, 2021; CN-02242328 | not pertinent |
| 167 | Garrett et al.,       | 2021 | Bipolar disorders, 2021                                           | not pertinent |
| 168 | Gardoki-Souto et al., | 2021 | Trials, 2021; 22(1)                                               | not pertinent |
| 169 | Garcia et al.,        | 2021 | J Med Internet Res. 2021 Feb 22; 23(2):e26292                     | not pertinent |
| 170 | Fortin et al.,        | 2021 | BMC musculoskeletal disorders, 2021; 22(1)                        | not pertinent |
| 171 | Forogh et al.,        | 2021 | Neurophysiology clinique, 2021                                    | not pertinent |
| 172 | Fisher et al.,        | 2021 | Nat Med. 2021 Jan; 27(1):165-173                                  | not pertinent |
| 173 | Ferrero et al.,       | 2021 | arthritis and rheumatism, 2021; 51(4):831-838                     | not pertinent |
| 174 | Fenton et al.,        | 2021 | Trials. 2021 Feb 27; 22(1):167                                    | not pertinent |
| 175 | Feger et al.,         | 2021 | Eur Radiol. 2021 Mar; 31(3):1471-1481                             | not pertinent |
| 176 | Falahatgar et al.,    | 2021 | Osteoarthritis and cartilage, 2021; 29:399-401                    | not pertinent |
| 177 | Esrick et al.,        | 2021 | N Engl J Med. 2021 Jan 21; 384(3):205-2015                        | not pertinent |
| 178 | Ettridge et al.,      | 2021 | Qual Life Res. 2021 Feb; 30(2):407-423                            | not pertinent |
| 179 | Elbogen et al.,       | 2021 | Pain Med. 2021 Feb 23; 22(2):329-337                              | not pertinent |
| 180 | Düz kaya et al.,      | 2021 | J Emerg Nurs. 2021 Jan; 47(1):76-87                               | not pertinent |

|     |                        |      |                                                                                |               |
|-----|------------------------|------|--------------------------------------------------------------------------------|---------------|
| 181 | Du et al.,             | 2021 | Medicine, 2021; 100(7):e24786                                                  | not pertinent |
| 182 |                        |      | Psychopharmacology (Berl). 2021 Mar; 238(3):677-689                            | not pertinent |
| 183 | Dou et al.,            | 2021 |                                                                                |               |
| 184 | Direito et al.,        | 2021 | Autism, 2021                                                                   | not pertinent |
| 185 | De Souza et al.,       | 2021 | Brain stimulation, 2021                                                        | not pertinent |
| 186 | Deng et al.,           | 2021 | Clinical breast cancer, 2021                                                   | not pertinent |
| 187 |                        |      |                                                                                |               |
| 188 | de Jong-Schmit et al., | 2021 | International journal of geriatric psychiatry, 2021; 36(1):46-53               | not pertinent |
| 189 |                        |      |                                                                                |               |
| 190 | De Icco et al.,        | 2021 | Clin Neurophysiol. 2021 Jan; 132(1):126-136                                    | not pertinent |
| 191 |                        |      |                                                                                |               |
| 192 | de Groot et al.,       | 2021 | Psychol Sci. 2021 Apr; 32(4):558-572                                           | not pertinent |
| 193 |                        |      |                                                                                |               |
| 194 | de Gooijer et al.,     | 2021 | Lancet Respir Med. 2021 Jun; 9(6):585-592                                      | not pertinent |
| 195 |                        |      |                                                                                |               |
| 196 | Das et al.,            | 2021 | Journal of laryngology and otology, 2021; 135(1):39-44                         | not pertinent |
| 197 |                        |      |                                                                                |               |
| 198 | Dai et al.,            | 2021 | Arthroscopy - journal of arthroscopic and related surgery, 2021; 37(1):340-358 | not pertinent |
| 199 | Dabelic et al.,        | 2021 | Libri oncologici, 2021; 49(1):54-56                                            | not pertinent |
| 200 |                        |      |                                                                                |               |
| 201 |                        |      |                                                                                |               |
| 202 |                        |      |                                                                                |               |
| 203 |                        |      |                                                                                |               |
| 204 |                        |      |                                                                                |               |
| 205 |                        |      |                                                                                |               |
| 206 |                        |      |                                                                                |               |
| 207 |                        |      |                                                                                |               |
| 208 |                        |      |                                                                                |               |
| 209 |                        |      |                                                                                |               |
| 210 |                        |      |                                                                                |               |
| 211 |                        |      |                                                                                |               |
| 212 |                        |      |                                                                                |               |
| 213 |                        |      |                                                                                |               |
| 214 |                        |      |                                                                                |               |
| 215 |                        |      |                                                                                |               |
| 216 |                        |      |                                                                                |               |
| 217 |                        |      |                                                                                |               |
| 218 |                        |      |                                                                                |               |
| 219 |                        |      |                                                                                |               |
| 220 |                        |      |                                                                                |               |
| 221 |                        |      |                                                                                |               |
| 222 |                        |      |                                                                                |               |
| 223 |                        |      |                                                                                |               |
| 224 |                        |      |                                                                                |               |
| 225 |                        |      |                                                                                |               |
| 226 |                        |      |                                                                                |               |
| 227 |                        |      |                                                                                |               |
| 228 |                        |      |                                                                                |               |
| 229 |                        |      |                                                                                |               |
| 230 |                        |      |                                                                                |               |
| 231 |                        |      |                                                                                |               |
| 232 |                        |      |                                                                                |               |
| 233 |                        |      |                                                                                |               |
| 234 |                        |      |                                                                                |               |
| 235 |                        |      |                                                                                |               |
| 236 |                        |      |                                                                                |               |
| 237 |                        |      |                                                                                |               |
| 238 |                        |      |                                                                                |               |
| 239 |                        |      |                                                                                |               |
| 240 |                        |      |                                                                                |               |
| 241 |                        |      |                                                                                |               |
| 242 |                        |      |                                                                                |               |
| 243 |                        |      |                                                                                |               |
| 244 |                        |      |                                                                                |               |
| 245 |                        |      |                                                                                |               |
| 246 |                        |      |                                                                                |               |
| 247 |                        |      |                                                                                |               |
| 248 |                        |      |                                                                                |               |
| 249 |                        |      |                                                                                |               |
| 250 |                        |      |                                                                                |               |
| 251 |                        |      |                                                                                |               |
| 252 |                        |      |                                                                                |               |
| 253 |                        |      |                                                                                |               |
| 254 |                        |      |                                                                                |               |
| 255 |                        |      |                                                                                |               |
| 256 |                        |      |                                                                                |               |
| 257 |                        |      |                                                                                |               |
| 258 |                        |      |                                                                                |               |
| 259 |                        |      |                                                                                |               |
| 260 |                        |      |                                                                                |               |
| 261 |                        |      |                                                                                |               |
| 262 |                        |      |                                                                                |               |
| 263 |                        |      |                                                                                |               |
| 264 |                        |      |                                                                                |               |
| 265 |                        |      |                                                                                |               |
| 266 |                        |      |                                                                                |               |
| 267 |                        |      |                                                                                |               |
| 268 |                        |      |                                                                                |               |
| 269 |                        |      |                                                                                |               |
| 270 |                        |      |                                                                                |               |
| 271 |                        |      |                                                                                |               |
| 272 |                        |      |                                                                                |               |
| 273 |                        |      |                                                                                |               |
| 274 |                        |      |                                                                                |               |
| 275 |                        |      |                                                                                |               |
| 276 |                        |      |                                                                                |               |
| 277 |                        |      |                                                                                |               |
| 278 |                        |      |                                                                                |               |
| 279 |                        |      |                                                                                |               |
| 280 |                        |      |                                                                                |               |
| 281 |                        |      |                                                                                |               |
| 282 |                        |      |                                                                                |               |
| 283 |                        |      |                                                                                |               |
| 284 |                        |      |                                                                                |               |
| 285 |                        |      |                                                                                |               |
| 286 |                        |      |                                                                                |               |
| 287 |                        |      |                                                                                |               |
| 288 |                        |      |                                                                                |               |
| 289 |                        |      |                                                                                |               |
| 290 |                        |      |                                                                                |               |
| 291 |                        |      |                                                                                |               |
| 292 |                        |      |                                                                                |               |
| 293 |                        |      |                                                                                |               |
| 294 |                        |      |                                                                                |               |
| 295 |                        |      |                                                                                |               |
| 296 |                        |      |                                                                                |               |
| 297 |                        |      |                                                                                |               |
| 298 |                        |      |                                                                                |               |
| 299 |                        |      |                                                                                |               |
| 300 |                        |      |                                                                                |               |
| 301 |                        |      |                                                                                |               |
| 302 |                        |      |                                                                                |               |
| 303 |                        |      |                                                                                |               |
| 304 |                        |      |                                                                                |               |
| 305 |                        |      |                                                                                |               |
| 306 |                        |      |                                                                                |               |
| 307 |                        |      |                                                                                |               |
| 308 |                        |      |                                                                                |               |
| 309 |                        |      |                                                                                |               |
| 310 |                        |      |                                                                                |               |
| 311 |                        |      |                                                                                |               |
| 312 |                        |      |                                                                                |               |
| 313 |                        |      |                                                                                |               |
| 314 |                        |      |                                                                                |               |
| 315 |                        |      |                                                                                |               |
| 316 |                        |      |                                                                                |               |
| 317 |                        |      |                                                                                |               |
| 318 |                        |      |                                                                                |               |
| 319 |                        |      |                                                                                |               |
| 320 |                        |      |                                                                                |               |
| 321 |                        |      |                                                                                |               |
| 322 |                        |      |                                                                                |               |
| 323 |                        |      |                                                                                |               |
| 324 |                        |      |                                                                                |               |
| 325 |                        |      |                                                                                |               |
| 326 |                        |      |                                                                                |               |
| 327 |                        |      |                                                                                |               |
| 328 |                        |      |                                                                                |               |
| 329 |                        |      |                                                                                |               |
| 330 |                        |      |                                                                                |               |
| 331 |                        |      |                                                                                |               |
| 332 |                        |      |                                                                                |               |
| 333 |                        |      |                                                                                |               |
| 334 |                        |      |                                                                                |               |
| 335 |                        |      |                                                                                |               |
| 336 |                        |      |                                                                                |               |
| 337 |                        |      |                                                                                |               |
| 338 |                        |      |                                                                                |               |
| 339 |                        |      |                                                                                |               |
| 340 |                        |      |                                                                                |               |
| 341 |                        |      |                                                                                |               |
| 342 |                        |      |                                                                                |               |
| 343 |                        |      |                                                                                |               |
| 344 |                        |      |                                                                                |               |
| 345 |                        |      |                                                                                |               |
| 346 |                        |      |                                                                                |               |
| 347 |                        |      |                                                                                |               |
| 348 |                        |      |                                                                                |               |
| 349 |                        |      |                                                                                |               |
| 350 |                        |      |                                                                                |               |
| 351 |                        |      |                                                                                |               |
| 352 |                        |      |                                                                                |               |
| 353 |                        |      |                                                                                |               |
| 354 |                        |      |                                                                                |               |
| 355 |                        |      |                                                                                |               |
| 356 |                        |      |                                                                                |               |
| 357 |                        |      |                                                                                |               |
| 358 |                        |      |                                                                                |               |
| 359 |                        |      |                                                                                |               |
| 360 |                        |      |                                                                                |               |
| 361 |                        |      |                                                                                |               |
| 362 |                        |      |                                                                                |               |
| 363 |                        |      |                                                                                |               |
| 364 |                        |      |                                                                                |               |
| 365 |                        |      |                                                                                |               |
| 366 |                        |      |                                                                                |               |
| 367 |                        |      |                                                                                |               |
| 368 |                        |      |                                                                                |               |
| 369 |                        |      |                                                                                |               |
| 370 |                        |      |                                                                                |               |
| 371 |                        |      |                                                                                |               |
| 372 |                        |      |                                                                                |               |
| 373 |                        |      |                                                                                |               |
| 374 |                        |      |                                                                                |               |
| 375 |                        |      |                                                                                |               |
| 376 |                        |      |                                                                                |               |
| 377 |                        |      |                                                                                |               |
| 378 |                        |      |                                                                                |               |
| 379 |                        |      |                                                                                |               |
| 380 |                        |      |                                                                                |               |
| 381 |                        |      |                                                                                |               |
| 382 |                        |      |                                                                                |               |
| 383 |                        |      |                                                                                |               |
| 384 |                        |      |                                                                                |               |
| 385 |                        |      |                                                                                |               |
| 386 |                        |      |                                                                                |               |
| 387 |                        |      |                                                                                |               |
| 388 |                        |      |                                                                                |               |
| 389 |                        |      |                                                                                |               |
| 390 |                        |      |                                                                                |               |
| 391 |                        |      |                                                                                |               |
| 392 |                        |      |                                                                                |               |
| 393 |                        |      |                                                                                |               |
| 394 |                        |      |                                                                                |               |
| 395 |                        |      |                                                                                |               |
| 396 |                        |      |                                                                                |               |
| 397 |                        |      |                                                                                |               |
| 398 |                        |      |                                                                                |               |
| 399 |                        |      |                                                                                |               |
| 400 |                        |      |                                                                                |               |
| 401 |                        |      |                                                                                |               |
| 402 |                        |      |                                                                                |               |
| 403 |                        |      |                                                                                |               |
| 404 |                        |      |                                                                                |               |
| 405 |                        |      |                                                                                |               |
| 406 |                        |      |                                                                                |               |
| 407 |                        |      |                                                                                |               |
| 408 |                        |      |                                                                                |               |
| 409 |                        |      |                                                                                |               |
| 410 |                        |      |                                                                                |               |
| 411 |                        |      |                                                                                |               |
| 412 |                        |      |                                                                                |               |
| 413 |                        |      |                                                                                |               |
| 414 |                        |      |                                                                                |               |
| 415 |                        |      |                                                                                |               |
| 416 |                        |      |                                                                                |               |
| 417 |                        |      |                                                                                |               |
| 418 |                        |      |                                                                                |               |
| 419 |                        |      |                                                                                |               |
| 420 |                        |      |                                                                                |               |
| 421 |                        |      |                                                                                |               |
| 422 |                        |      |                                                                                |               |
| 423 |                        |      |                                                                                |               |
| 424 |                        |      |                                                                                |               |
| 425 |                        |      |                                                                                |               |
| 426 |                        |      |                                                                                |               |
| 427 |                        |      |                                                                                |               |
| 428 |                        |      |                                                                                |               |
| 429 |                        |      |                                                                                |               |
| 430 |                        |      |                                                                                |               |
| 431 |                        |      |                                                                                |               |
| 432 |                        |      |                                                                                |               |
| 433 |                        |      |                                                                                |               |
| 434 |                        |      |                                                                                |               |
| 435 |                        |      |                                                                                |               |
| 436 |                        |      |                                                                                |               |
| 437 |                        |      |                                                                                |               |
| 438 |                        |      |                                                                                |               |
| 439 |                        |      |                                                                                |               |
| 440 |                        |      |                                                                                |               |
| 441 |                        |      |                                                                                |               |
| 442 |                        |      |                                                                                |               |
| 443 |                        |      |                                                                                |               |
| 444 |                        |      |                                                                                |               |
| 445 |                        |      |                                                                                |               |
| 446 |                        |      |                                                                                |               |
| 447 |                        |      |                                                                                |               |
| 448 |                        |      |                                                                                |               |
| 449 |                        |      |                                                                                |               |
| 450 |                        |      |                                                                                |               |
| 451 |                        |      |                                                                                |               |
| 452 |                        |      |                                                                                |               |
| 453 |                        |      |                                                                                |               |
| 454 |                        |      |                                                                                |               |
| 455 |                        |      |                                                                                |               |
| 456 |                        |      |                                                                                |               |
| 457 |                        |      |                                                                                |               |
| 458 |                        |      |                                                                                |               |
| 459 |                        |      |                                                                                |               |
| 460 |                        |      |                                                                                |               |
| 461 |                        |      |                                                                                |               |
| 462 |                        |      |                                                                                |               |
| 463 |                        |      |                                                                                |               |
| 464 |                        |      |                                                                                |               |
| 465 |                        |      |                                                                                |               |
| 466 |                        |      |                                                                                |               |
| 467 |                        |      |                                                                                |               |
| 468 |                        |      |                                                                                |               |
| 469 |                        |      |                                                                                |               |
| 470 |                        |      |                                                                                |               |
| 471 |                        |      |                                                                                |               |
| 472 |                        |      |                                                                                |               |
| 473 |                        |      |                                                                                |               |
| 474 |                        |      |                                                                                |               |
| 475 |                        |      |                                                                                |               |
| 476 |                        |      |                                                                                |               |
| 477 |                        |      |                                                                                |               |
| 478 |                        |      |                                                                                |               |
| 479 |                        |      |                                                                                |               |
| 480 |                        |      |                                                                                |               |
| 481 |                        |      |                                                                                |               |
| 482 |                        |      |                                                                                |               |
| 483 |                        |      |                                                                                |               |
| 484 |                        |      |                                                                                |               |
| 485 |                        |      |                                                                                |               |
| 486 |                        |      |                                                                                |               |
| 487 |                        |      |                                                                                |               |
| 488 |                        |      |                                                                                |               |
| 489 |                        |      |                                                                                |               |
| 490 |                        |      |                                                                                |               |
| 491 |                        |      |                                                                                |               |
| 492 |                        |      |                                                                                |               |
| 493 |                        |      |                                                                                |               |
| 494 |                        |      |                                                                                |               |
| 495 |                        |      |                                                                                |               |
| 496 |                        |      |                                                                                |               |
| 497 |                        |      |                                                                                |               |
| 498 |                        |      |                                                                                |               |
| 499 |                        |      |                                                                                |               |
| 500 |                        |      |                                                                                |               |
| 501 |                        |      |                                                                                |               |
| 502 |                        |      |                                                                                |               |
| 503 |                        |      |                                                                                |               |
| 504 |                        |      |                                                                                |               |
| 505 |                        |      |                                                                                |               |
| 506 |                        |      |                                                                                |               |
| 507 |                        |      |                                                                                |               |
| 508 |                        |      |                                                                                |               |
| 509 |                        |      |                                                                                |               |
| 510 |                        |      |                                                                                |               |
| 511 |                        |      |                                                                                |               |
| 512 |                        |      |                                                                                |               |
| 513 |                        |      |                                                                                |               |
| 514 |                        |      |                                                                                |               |
| 515 |                        |      |                                                                                |               |
| 516 |                        |      |                                                                                |               |
| 517 |                        |      |                                                                                |               |
| 518 |                        |      |                                                                                |               |
| 519 |                        |      |                                                                                |               |
| 520 |                        |      |                                                                                |               |
| 521 |                        |      |                                                                                |               |
| 522 |                        |      |                                                                                |               |
| 523 |                        |      |                                                                                |               |
| 524 |                        |      |                                                                                |               |
| 525 |                        |      |                                                                                |               |
| 526 |                        |      |                                                                                |               |
| 527 |                        |      |                                                                                |               |
| 528 |                        |      |                                                                                |               |
| 529 |                        |      |                                                                                |               |
| 530 |                        |      |                                                                                |               |
| 531 |                        |      |                                                                                |               |
| 532 |                        |      |                                                                                |               |
| 533 |                        |      |                                                                                |               |
| 534 |                        |      |                                                                                |               |
| 535 |                        |      |                                                                                |               |
| 536 |                        |      |                                                                                |               |
| 537 |                        |      |                                                                                |               |
| 538 |                        |      |                                                                                |               |
| 539 |                        |      |                                                                                |               |
| 540 |                        |      |                                                                                |               |
| 541 |                        |      |                                                                                |               |
| 542 |                        |      |                                                                                |               |
| 543 |                        |      |                                                                                |               |
| 544 |                        |      |                                                                                |               |
| 545 |                        |      |                                                                                |               |
| 546 |                        |      |                                                                                |               |
| 547 |                        |      |                                                                                |               |
| 548 |                        |      |                                                                                |               |
| 549 |                        |      |                                                                                |               |
| 550 |                        |      |                                                                                |               |
| 551 |                        |      |                                                                                |               |
| 552 |                        |      |                                                                                |               |
| 553 |                        |      |                                                                                |               |
| 554 |                        |      |                                                                                |               |
| 555 |                        |      |                                                                                |               |
| 556 |                        |      |                                                                                |               |
| 557 |                        |      |                                                                                |               |
| 558 |                        |      |                                                                                |               |
| 559 |                        |      |                                                                                |               |
| 560 |                        |      |                                                                                |               |
| 561 |                        |      |                                                                                |               |
| 562 |                        |      |                                                                                |               |
| 563 |                        |      |                                                                                |               |
| 564 |                        |      |                                                                                |               |
| 565 |                        |      |                                                                                |               |
| 566 |                        |      |                                                                                |               |
| 567 |                        |      |                                                                                |               |
| 568 |                        |      |                                                                                |               |
| 569 |                        |      |                                                                                |               |
| 570 |                        |      |                                                                                |               |
| 571 |                        |      |                                                                                |               |
| 572 |                        |      |                                                                                |               |
| 573 |                        |      |                                                                                |               |
| 574 |                        |      |                                                                                |               |
| 575 |                        |      |                                                                                |               |
| 576 |                        |      |                                                                                |               |
| 577 |                        |      |                                                                                |               |
|     |                        |      |                                                                                |               |

|     |                      |      |                                                                                   |               |
|-----|----------------------|------|-----------------------------------------------------------------------------------|---------------|
| 200 |                      |      | Experimental and therapeutic medicine, 2021; 22(2)                                | not pertinent |
|     | Chen et al.,         | 2021 |                                                                                   |               |
| 201 |                      |      | Clin Interv Aging. 2021 May 17; 16:843-852                                        | not pertinent |
|     | Chen et al.,         | 2021 |                                                                                   |               |
| 202 |                      |      | Journal of clinical oncology, 2021; 39(6)                                         | not pertinent |
|     | Chen et al.,         | 2021 |                                                                                   |               |
| 203 |                      |      | J Ultrasound Med. 2021 Jun;40(6):1147-1153                                        | not pertinent |
|     | Chhabra et al.,      | 2021 |                                                                                   |               |
| 204 |                      |      | Scientific reports, 2021; 11(1):4556-                                             | not pertinent |
|     | Cerritelli et al.,   | 2021 |                                                                                   |               |
| 205 |                      |      | J Sci Med Sport. 2021 Mar; 24(3):258-263                                          | not pertinent |
|     | Cederström et al.,   | 2021 |                                                                                   |               |
| 206 |                      |      | Trials. 2021 Aug 30; 22(1):580                                                    | not pertinent |
|     | Carswell et al.,     | 2021 |                                                                                   |               |
| 207 |                      |      | Pain, 2021                                                                        | not pertinent |
|     | Burns et al.,        | 2021 |                                                                                   |               |
| 208 |                      |      | Journal of pain, 2021; 22(5):603-                                                 | not pertinent |
|     | Bush et al.,         | 2021 |                                                                                   |               |
| 209 |                      |      | Translational psychiatry, 2021; 11(1)                                             | not pertinent |
|     | Bryant et al.,       | 2021 |                                                                                   |               |
| 210 |                      |      | Trials. 2021 Aug 21; 22(1):552                                                    | not pertinent |
|     | Britting et al.,     | 2021 |                                                                                   |               |
| 211 |                      |      | Hum Reprod. 2021 Jan 25; 36(2):349-357                                            | not pertinent |
|     | Bourdon et al.,      | 2021 |                                                                                   |               |
| 212 |                      |      | Diseases of the colon and rectum, 2021; 64(2):225-233                             | not pertinent |
|     | Blank et al.,        | 2021 |                                                                                   |               |
| 213 |                      |      | Biological psychiatry, 2021; 89(9):226-227                                        | not pertinent |
|     | Berry-Kravis et al.  | 2021 |                                                                                   |               |
| 214 |                      |      | Osteoarthritis and cartilage, 2021; 29:272-273                                    | not pertinent |
|     | Berezovskaya et al., | 2021 |                                                                                   |               |
| 215 |                      |      | Early human development, 2021; 154                                                | not pertinent |
|     | Benoit et al.,       | 2021 |                                                                                   |               |
| 216 |                      |      | Evidence-based practice in child and adolescent mental health, 2021; 6(2):173-190 | not pertinent |
|     | Benito et al.,       | 2021 |                                                                                   |               |
| 217 |                      |      | Am J Emerg Med. 2021 Sep; 47:125-130                                              | not pertinent |
|     | Bayram et al.,       | 2021 |                                                                                   |               |
| 218 |                      |      | Knee. 2021 Jan; 28:256-265                                                        | not pertinent |
|     | Bandak et al.,       | 2021 |                                                                                   |               |
| 219 |                      |      | Reg Anesth Pain Med. 2021 Jan; 46(1):35-40                                        | not pertinent |
|     | Balocco et al.,      | 2021 |                                                                                   |               |
| 220 |                      |      | Pain Res Manag. 2021 Apr 3; 2021:5585060                                          | not pertinent |
|     | Balconi et al.,      | 2021 |                                                                                   |               |

|     |                             |      |                                                                         |               |
|-----|-----------------------------|------|-------------------------------------------------------------------------|---------------|
| 221 | Al-Karagholi et al.,        | 2021 | J Cereb Blood Flow Metab. 2021 Jun; 41(6):1328-1337                     | not pertinent |
| 222 | Ahmadi et al.,              | 2021 | Trials. 2021 Jan 25; 22(1):87                                           | not pertinent |
| 223 | Addiego et al.,             | 2021 | Life Sci. 2021 Oct 1; 282:119749                                        | non pertinent |
| 224 | Ackermann et al.,           | 2021 | J Hand Ther. 2021 Apr-Jun; 34(2):309-314                                | non pertinent |
| 225 | Abonour et al.,             | 2021 | Br J Haematol. 2021 Apr; 193(1):93-100                                  | non pertinent |
| 226 | AbdElkader et al.,          | 2021 | Egyptian journal of neurology, psychiatry and neurosurgery, 2021; 57(1) | non pertinent |
| 227 | Ziegeler et al.,            | 2020 | Neurology. 2020 Nov 17; 95(20):e2794-e2802                              | non pertinent |
| 228 | Zhu et al.,                 | 2020 | Trials. 2020 Sep 16; 21(1):795                                          | non pertinent |
| 229 | Zhu et al.,                 | 2020 | BMJ open, 2020; 10(10)                                                  | non pertinent |
| 230 | Zhao et al.,                | 2020 | Psychophysiology; 2020:e13717-                                          | non pertinent |
| 231 | Zhang et al.,               | 2020 | Chinese journal of tissue engineering research, 2020; 24(15):2405-2409  | non pertinent |
| 232 | Zehry et al.,               | 2020 | Neuroreport, 2020; 31(5):406-410                                        | non pertinent |
| 233 | Zdziarski-Horodyski et al., | 2020 | Clinical orthopaedics and related research, 2020; 478(4):792-804        | non pertinent |
| 234 | Zale et al.,                | 2020 | Experimental and clinical psychopharmacology, 2020                      | non pertinent |
| 235 | Zahirovic                   | 2020 | Libri oncologici, 2020; 48(1):58-59                                     | non pertinent |
| 236 | Zahid et al.,               | 2020 | JMIR mhealth and uhealth, 2020; 8(4):e17108-                            | non pertinent |
| 237 | Yung et al.,                | 2020 | J Man Manip Ther. 2020 May; 28(2):82-93                                 | non pertinent |
| 238 | Yu et al.,                  | 2020 | Journal of clinical medicine, 2020; 9(6):1-16                           | non pertinent |
| 239 | Younossi et al.             | 2020 | Hepatology (Baltimore, Md.), 2020; 72(1):1019A-1020A                    | non pertinent |

|     |                  |      |                                                                                                |               |
|-----|------------------|------|------------------------------------------------------------------------------------------------|---------------|
| 240 | You et al.,      | 2020 | International<br>journal of clinical<br>and experimental<br>medicine, 2020;                    | non pertinent |
| 241 | Ying et al.,     | 2020 | J Orthop Res. 2020<br>Feb; 38(2):269-<br>276                                                   | non pertinent |
| 242 | Yearwood et al., | 2020 | Neuromodulation.<br>2020 Jan; 23(1):56-<br>63                                                  | non pertinent |
| 243 | Yanzhi et al.,   | 2020 | Brain structure &<br>function, 2020;<br>226:151-162                                            | non pertinent |
| 244 | Yang et al.,     | 2020 | PLoS One. 2020<br>Nov 5;<br>15(11):e0241828                                                    | non pertinent |
| 245 | Yan et al.,      | 2020 | Neural Plast. 2020<br>Apr 25;<br>2020:5701042                                                  | non pertinent |
| 246 | Xu et al.,       | 2020 | Medicine<br>(Baltimore). 2020<br>Dec 18;<br>99(51):e23812                                      | non pertinent |
| 247 | Xu et al.,       | 2020 | International<br>journal of clinical<br>and experimental<br>medicine, 2020;<br>13(5):3531-3539 | non pertinent |
| 248 | Xiong et al.,    | 2020 | Chin J Integr Med.<br>2020 Aug;<br>26(8):609-616                                               | non pertinent |
| 249 | Xing et al.,     | 2020 | BMC Anesthesiol.<br>2020 May 19;<br>20(1):117                                                  | non pertinent |
| 250 | Wyndow et al.,   | 2020 | Osteoarthritis and<br>cartilage, 2020;<br>28:397-398                                           | non pertinent |
| 251 | Wu et al.,       | 2020 | J Nurs Scholarsh.<br>2020 Sep;<br>52(5):467-475                                                | non pertinent |
| 252 | Wilson et al.,   | 2020 | JAMA, 2020;<br>342(22):2282-<br>2291                                                           | non pertinent |
| 253 | Williams et al., | 2020 | Circulation. 2020<br>May 5;<br>141(18):1452-<br>1462                                           | non pertinent |
| 254 | Williams et al., | 2020 | Contemporary<br>clinical trials,<br>2020; 90:105935                                            | non pertinent |
| 255 | Whi et al.,      | 2020 | Medicine<br>(Baltimore). 2020<br>Jul 2;<br>99(27):e21047                                       | non pertinent |
| 256 | West et al.,     | 2020 | Radiotherapy and<br>oncology, 2020;<br>152:658-                                                | non pertinent |
| 257 | Wenting et al.,  | 2020 | Neural plasticity,<br>2020                                                                     | non pertinent |
| 258 | Wendling et al., | 2020 | J Rheumatol. 2020<br>Mar; 47(3):349-<br>353                                                    | non pertinent |

|     |                     |      |                                                                                    |                             |
|-----|---------------------|------|------------------------------------------------------------------------------------|-----------------------------|
| 259 |                     |      | Journal of the American Geriatrics Society, 2020; 68(1):154-154                    | non pertinent               |
|     | Wehrmeyer et al.,   | 2020 | Osteoarthritis and cartilage, 2020; 28:478-479                                     | non pertinent               |
| 260 |                     |      | International journal of clinical and experimental medicine, 2020; 13(3):1596-1603 | non pertinent               |
| 261 |                     |      | PloS one, 2020; 15(12)                                                             | non pertinent               |
| 262 | Wang et al.,        | 2020 |                                                                                    | non pertinent               |
| 263 |                     |      | Brain Behav. 2020 Aug; 10(8):e01713                                                | non pertinent               |
| 264 | Wang et al.,        | 2020 |                                                                                    | non pertinent               |
| 265 | Wagner et al.,      | 2020 | Neuroimage. 2020 Oct 1; 219:117024                                                 | non pertinent               |
| 266 |                     |      | Hemasphere, 2020; 4:460-461                                                        | non pertinent               |
| 267 | Wagner et al.,      | 2020 | PLoS One. 2020 Dec 3; 15(12):e0243366                                              | non pertinent               |
| 268 | Wadley et al.,      | 2020 | Journal of pain research, 2020; 13:491-502                                         | non pertinent               |
| 269 |                     |      | Neuropsychologia. 2020 Jul; 144:107494                                             | non pertinent               |
| 270 | Voza et al.,        | 2020 | J Stroke Cerebrovasc Dis. 2020 Aug; 29(8):104993                                   | non pertinent               |
| 271 |                     |      | Yale J Biol Med. 2020 Jun 29; 93(2):229-238                                        | non pertinent               |
| 272 | Visvanathan et al., | 2020 | Human reproduction. Conference: 36th annual meeting, ESHRE, 2020; 35(1):i11        | ongoing – not published yet |
| 273 |                     |      | Annals of oncology, 2020; 31:224-225                                               | non pertinent               |
| 274 | Velez et al.,       | 2020 | Pain practice, 2020; 20(1):40-40                                                   | ongoing – not published yet |
| 275 | Varrassi et al.,    | 2020 | Brain stimulation, 2020; 13(6):1853-1853                                           | non pertinent               |
| 276 | Vaninetti et al.,   | 2020 | Gastroenterology, 2020; 158(6):907                                                 | non pertinent               |
| 277 | van Tilburg et al., | 2020 | Frontiers in surgery, 2020; 7:5                                                    | ongoing – not published yet |
| 278 | van Hoof et al.,    | 2020 | Journal of clinical monitoring and computing, 2020                                 | non pertinent               |
| 279 | van Heusden et al., | 2020 | Schizophrenia bulletin, 2020; 46:245-                                              | non pertinent               |

|     |                           |      |                                                                                              |               |
|-----|---------------------------|------|----------------------------------------------------------------------------------------------|---------------|
| 279 | Vallone et al.,           | 2020 | Neurologist. 2020 Nov; 25(6):162-167                                                         | non pertinent |
| 280 | Vahldiek et al.,          | 2020 | Rofo. 2020 Oct; 192(10):945-951                                                              | non pertinent |
| 281 | van der Heide et al.,     | 2020 | J Parkinsons Dis. 2020; 10(4): 1355-1364                                                     | non pertinent |
| 282 | Uyugr-Kucukseymen et al., | 2020 | Neurophysiol Clin. 2020 Sep; 50(4):279-288                                                   | non pertinent |
| 283 | Uysal et al.,             | 2020 | J Thorac Cardiovasc Surg. 2020 Mar; 159(3):943-953                                           | non pertinent |
| 284 | Ulmner V                  | 2020 | J Oral Rehabil. 2020 Oct; 47(10):1202-1211                                                   | non pertinent |
| 285 | Turgeon et al.,           | 2020 | Canadian journal of cardiology, 2020; 36(10):22-                                             | non pertinent |
| 286 | Treffel et al.,           | 2020 | Int J Mol Sci. 2020 May 26; 21(11):3748                                                      | non pertinent |
| 287 | Tonin et al.,             | 2020 | Cranio. 2020 Jan; 38(1):34-42                                                                | non pertinent |
| 288 | Tong et al.,              | 2020 | International journal of clinical and experimental medicine, 2020; 13(4):2782-2789           | non pertinent |
| 289 | Togioka et al.,           | 2020 | Br J Anaesth. 2020 May; 124(5):553-561                                                       | non pertinent |
| 290 | Thomas et al.,            | 2020 | Journal of Alzheimer's disease, 2020; 75(2):617-631                                          | non pertinent |
| 291 | Themelis et al.,          | 2020 | Psychosomatic medicine, 2020; 82(6):A162-                                                    | non pertinent |
| 292 | Thamkhantho et al.,       | 2020 | Chotmaihet thangphaet (Journal of the Medical Association of Thailand), 2020; 103(5):442-448 | non pertinent |
| 293 | Teixeira et al.,          | 2020 | Scand J Pain. 2020 Oct 25; 20(4):651-661                                                     | non pertinent |
| 294 | Teferi et al.,            | 2020 | Biological psychiatry, 2021; 89(9):289-                                                      | non pertinent |
| 295 | Tawfeek et al.,           | 2020 | Central european journal of urology, 2020; 73(4):1-7                                         | non pertinent |
| 296 | Tang et al.,              | 2020 | BMJ open, 2020; 10(3):e034764                                                                | non pertinent |
| 297 | Tang et al.,              | 2020 | Trials. 2020 May 24; 21(1):421                                                               | non pertinent |

|     |                      |      |                                                          |               |
|-----|----------------------|------|----------------------------------------------------------|---------------|
| 298 | Tam et al,           | 2020 | Vasc Med. 2020 Jun; 25(3):223-225                        | non pertinent |
| 299 | Tadrous et al,       | 2020 | JAMA Netw Open. 2020 May 1; 3(5):e205724                 | non pertinent |
| 300 | Suso-Marti et al,    | 2020 | Physiol Behav. 2020 Mar 1; 215:112774                    | non pertinent |
| 301 | Sun et al,           | 2020 | Translational psychiatry, 2020; 10(1)                    | non pertinent |
| 302 | Suffoletto et al,    | 2020 | Pain Med. 2020 Nov 7; 21(7):1393-1399                    | non pertinent |
| 303 | Strand et al,        | 2020 | Arthritis Res Ther. 2020 Oct 15; 22(1):243               | non pertinent |
| 304 | Stewart et al,       | 2020 | Obstetrics and gynecology, 2020; 135:27                  | non pertinent |
| 305 | Stewart et al,       | 2020 | Journal of minimally invasive gynecology, 2020; 27(7):8- | non pertinent |
| 306 | Stetzelberger et al, | 2020 | Clinical orthopaedics and related research, 2020         | non pertinent |
| 307 | Stenzl et al,        | 2020 | European urology open science, 2020; 19:e1701-           | non pertinent |
| 308 | Stankovic et al,     | 2020 | Experimental brain research, 2020; 238(11):2641-2651     | non pertinent |
| 309 | Soni et al,          | 2020 | Rheumatology (Oxford). 2020 Aug 1; 59(8):2074-2084       | non pertinent |
| 310 | Somaiah et al,       | 2020 | Oncoimmunology. 2020 Nov 19; 9(1):1847846                | non pertinent |
| 311 | Soh et al,           | 2020 | J Clin Monit Comput. 2020 Aug; 34(4):715-723             | non pertinent |
| 312 | Smet et al,          | 2020 | Clinical neurophysiology, 2020; 131(4)                   | non pertinent |
| 313 | Skvortsova et al,    | 2020 | PLoS One. 2020 Mar 19; 15(3):e0229692                    | non pertinent |
| 314 | Singh et al,         | 2020 | JAMA cardiology, 2020                                    | non pertinent |
| 315 | Simis et al.         | 2020 | Clinical neurophysiology, 2020; 131(8):1806-1814         | non pertinent |



|     |                      |      |                                                              |                             |
|-----|----------------------|------|--------------------------------------------------------------|-----------------------------|
| 316 | Siegel et al.,       | 2020 | Lancet Psychiatry. 2020 Nov; 7(11):971-981                   | non pertinent               |
| 317 | Sidhu et al.,        | 2020 | Orphanet J Rare Dis. 2020 Sep 16; 15(1):251                  | non pertinent               |
| 318 | Siebenga et al.,     | 2020 | Clin Transl Sci. 2020 Mar; 13(2):318-324                     | non pertinent               |
| 319 | Shrestha et al.      | 2020 | Chest, 2020; 158(4):A710-                                    | non pertinent               |
| 320 | Shin et al.,         | 2020 | BMC Anesthesiol. 2020 Feb 26; 20(1):49                       | non pertinent               |
| 321 | Sharpe et al.,       | 2020 | Global advances in health and medicine, 2020; 9:103-         | non pertinent               |
| 322 | Sharma et al.,       | 2020 | Indian journal of ophthalmology, 2020; 68(4):577-582         | ongoing – not published yet |
| 323 | Shahidi et al.,      | 2020 | Spine (Phila Pa 1976). 2020 Feb 15; 45(4):E189-E195          | ongoing – not published yet |
| 324 | Seward et al.,       | 2020 | Journal of orthopaedic surgery and research, 2020; 15(1):531 | not published yet           |
| 325 | Sevinc et al.,       | 2020 | Global advances in health and medicine, 2020; 9:25-          | ongoing – not published yet |
| 326 | Sevinc et al.,       | 2020 | Brain Behav. 2020 Sep; 10(9):e01766                          | initial ethics approval     |
| 327 | Sevel et al.,        | 2020 | Brain Imaging Behav. 2020 Jun; 14(3):881-896                 | non pertinent               |
| 328 | Seward et al.,       | 2020 | J Orthop Surg Res. 2020 Nov 13; 15(1):531                    | non pertinent               |
| 329 | Serrano et al.,      | 2020 | Journal of pain research, 2020; 13:2297-2311                 | non pertinent               |
| 330 | Seminowicz et al.,   | 2020 | Pain, 2020; 161(8):1837-1846                                 | non pertinent               |
| 331 | Seminowicz et al.,   | 2020 | Pain. 2020 Aug; 161(8):1837-1846                             | non pertinent               |
| 332 | Seemann et al.,      | 2020 | Rofo. 2020 Apr; 192(4):335-342                               | non pertinent               |
| 333 | Schwab et al.,       | 2020 | Psychiatry Res Neuroimaging. 2020 Jun 30; 300:111066         | non pertinent               |
| 334 | Schwarzmeier et al., | 2020 | Int J Methods Psychiatr Res. 2020 Jun; 29(2):e1812           | non pertinent               |

|     |                       |      |                                                                                   |               |
|-----|-----------------------|------|-----------------------------------------------------------------------------------|---------------|
| 335 | Schneider et al.,     | 2020 | European journal of pain (united kingdom), 2020; 24(5):945-955                    | non pertinent |
| 336 | Schmid et al.,        | 2020 | Annals of oncology, 2020; 31:81-                                                  | non pertinent |
| 337 | Schindler et al.,     | 2020 | Psychopharmacology (Berl). 2020 Oct; 237(10):3097-3107                            | non pertinent |
| 338 | Schimanski et al.,    | 2020 | Oncoimmunology, 2020; 9(1)                                                        | non pertinent |
| 339 | Scheuzger et al.,     | 2020 | Crit Care. 2020 Jan 17; 24(1):18                                                  | non pertinent |
| 340 | Schmid et al.,        | 2020 | Br J Anaesth. 2020 Sep; 125(3):330-335                                            | non pertinent |
| 341 | Schett et al.,        | 2020 | The lancet rheumatology, 2020; 2(10):e623-e632                                    | non pertinent |
| 342 | Schertz et al.,       | 2020 | Clinical neurophysiology, 2020; 131(4):e16-e17                                    | non pertinent |
| 343 | Scherrenberg et al.,  | 2020 | Acta clinical Belgica, 2020; 75:35-36                                             | non pertinent |
| 344 | Schenker et al.,      | 2020 | Annals of the rheumatic diseases, 2020; 79(1):135-136                             | non pertinent |
| 345 | Santocchi et al.,     | 2020 | Frontiers in psychiatry, 2020; 11                                                 | non pertinent |
| 346 | Sanghera et al.,      | 2020 | Radiotherapy and oncology, 2020; 150:23-24                                        | non pertinent |
| 347 | Sanghera et al.,      | 2020 | International journal of radiation oncology biology physics, 2020; 108(3):e21-e22 | non pertinent |
| 348 | Sander et al.,        | 2020 | JAMA Psychiatry. 2020 Oct 1; 77(10):1001-1011                                     | non pertinent |
| 349 | Sanabria-Mazo et al., | 2020 | Journal of clinical medicine, 2020; 9(10):1-16                                    | non pertinent |
| 350 | Saleh et al.,         | 2020 | NMR Biomed. 2020 Apr; 33(4):e4227                                                 | non pertinent |
| 351 | Salas Noain et al.,   | 2020 | American journal of gastroenterology, 2020; 115:1628-                             | non pertinent |
| 352 | Salamone et al.,      | 2020 | BMJ open, 2020; 10(3)                                                             | non pertinent |
| 353 | Ruchman et al.,       | 2020 | Journal of general internal medicine, 2020; 35(1):532-                            | non pertinent |

|     |                     |      |                                                          |               |
|-----|---------------------|------|----------------------------------------------------------|---------------|
| 354 | Ruan et al.         | 2020 | Osteoarthritis and cartilage, 2020; 28:473-474           | non pertinent |
| 355 | Rovati et al.,      | 2020 | Osteoarthritis and cartilage, 2020; 28(1):22-30          | non pertinent |
| 356 | Rodrigues et al.,   | 2020 | Lasers in medical science, 2020; 35(1):269-              | non pertinent |
| 357 | ROCCS               | 2020 | Lancet. 2020 Feb 8; 395(10222):417-426                   | non pertinent |
| 358 | Rivas et al.,       | 2020 | J Therm Biol. 2020 Dec; 94:102741                        | non pertinent |
| 359 | Rios-Diaz et al.,   | 2020 | Lancet (london, england), 2020; 395(10222):417-426       | non pertinent |
| 360 | Riordan et al.,     | 2020 | Implementation science, 2020; 15(1):34-                  | non pertinent |
| 361 | Ridderbusch et al., | 2020 | Neuroimage: clinical, 2020; 27                           | non pertinent |
| 362 | Ribeiro et al.,     | 2020 | Occup Environ Med. 2020 Jul; 77(7):462-469               | non pertinent |
| 363 | Ree et al.,         | 2020 | Eur J Pain. 2020 Jan; 24(1):110-121                      | non pertinent |
| 364 | Redmond et al.,     | 2020 | Int J Radiat Oncol Biol Phys. 2020 Feb 1; 106(2):261-268 | non pertinent |
| 365 | Rech et al.,        | 2020 | Annals of the rheumatic diseases, 2020; 79(1):77-78      | non pertinent |
| 366 | Rastogi et al.,     | 2020 | Toxicol Appl Pharmacol. 2020 May 15; 395:114976          | non pertinent |
| 367 | Ramesh et al.,      | 2020 | Movement disorders, 2020; 35(1):474-                     | non pertinent |
| 368 | Ramaseshan et al.,  | 2020 | Am J Obstet Gynecol. 2020 Aug; 223(2):262.e1-262.e8      | non pertinent |
| 369 | Raque-Bogda et al., | 2020 | J Psychosoc Oncol. 2020 Nov-Dec; 38(6):649-669           | non pertinent |
| 370 | Rapcan et al.,      | 2020 | Wien Klin Wochenschr. 2020 Sep; 132(17-18):526-534       | non pertinent |
| 371 | Raju et al.,        | 2020 | BMC Anesthesiol. 2020 Sep 3; 20(1):222                   | non pertinent |
| 372 | Rae Olmsted et al., | 2020 | JAMA Psychiatry. 2020 Feb 1; 77(2):130-138               | non pertinent |

|     |                          |      |                                                          |               |
|-----|--------------------------|------|----------------------------------------------------------|---------------|
| 373 | Rabinak et al.,          | 2020 | Psychopharmacology (Berl). 2020 Jun; 237(6):1813-1826    | non pertinent |
| 374 | Qiao et al.,             | 2020 | Neuroscience letters, 2020; 738                          | non pertinent |
| 375 | Pruiksma et al.,         | 2020 | J Clin Sleep Med. 2020 Jan 15; 16(1):29-40               | non pertinent |
| 376 | Pollonini et al.,        | 2020 | J Neuroimaging. 2020 Nov; 30(6):808-814                  | non pertinent |
| 377 | Pleus et al.,            | 2020 | IBROS reports, 2020; 9:78-84                             | non pertinent |
| 378 | Platts-Mills et al.,     | 2020 | Trials. 2020 Jul 6; 21(1):615                            | non pertinent |
| 379 | Planchuelo-Gomez et al., | 2020 | J Headache Pain. 2020 Jan 2; 21(1):1                     | non pertinent |
| 380 | Pieracci et al.,         | 2020 | J Trauma Acute Care Surg. 2020 Feb; 88(2):249-257        | non pertinent |
| 381 | Pielkenrood et al.,      | 2020 | Radiotherapy and oncology, 2020; 152:201-202             | non pertinent |
| 382 | Petrone et al.,          | 2020 | Spine journal, 2020; 20(9):200                           | non pertinent |
| 383 | Petersen et al.,         | 2020 | Clin J Pain. 2020 Jan; 36(1):34-40                       | non pertinent |
| 384 | Pernicova et al.,        | 2020 | The lancet. Diabetes & endocrinology, 2020; 8(4):278-291 | non pertinent |
| 385 | Perez-Llanes et al.,     | 2020 | Physiotherapy theory and practice, 2020; 1-10            | non pertinent |
| 386 | Peng et al.,             | 2020 | Neuroimage Clin. 2020; 28:102454                         | non pertinent |
| 387 | Peabody et al.,          | 2020 | Diagnostics, 2020; 18(8)                                 | non pertinent |
| 388 | Paulus et al.,           | 2020 | Neuropsychopharmacology, 2020                            | non pertinent |
| 389 | Patterson et al.,        | 2020 | American journal of emergency medicine, 2020             | non pertinent |
| 390 | Patel et al.,            | 2020 | Am J Respir Crit Care Med. 2020 Sep 1; 202(5):690-699    | non pertinent |
| 391 | Patel et al.,            | 2020 | Ann Surg. 2020 Aug; 272(2):284-287                       | non pertinent |
| 392 | Pacharatrakul et al.,    | 2020 | Gastroenterology, 2020; 158(6):1148                      | non pertinent |
| 393 | Pacharatrakul et al.,    | 2020 | Nutrients. 2020 Dec 4; 12(12):3740                       | non pertinent |
| 394 | Paskins et al.,          | 2020 | Osteoarthritis and cartilage, 2020; 28:479-              | non pertinent |

|     |                      |      |                                                                   |               |
|-----|----------------------|------|-------------------------------------------------------------------|---------------|
| 395 | Paskins et al.,      | 2020 | Rheumatology (united kingdom), 2020; 59:ii2-                      | non pertinent |
| 396 | Park et al.,         | 2020 | Female pelvic medicine & reconstructive surgery, 2020; 26(10):95- | non pertinent |
| 397 | Park et al.,         | 2020 | Medicine (Baltimore). 2020 Sep 4; 99(36):e21823                   | non pertinent |
| 398 | Pardanani et al.,    | 2020 | Blood, 2020; 136(1):10-12                                         | non pertinent |
| 399 | Paravlic et al.,     | 2020 | J Orthop Surg Res. 2020 Oct 2; 15(1):451                          | non pertinent |
| 400 | Pape et al.,         | 2020 | Therapeutic advances in gastroenterology, 2020; 13                | non pertinent |
| 401 | Pajedienne et al.,   | 2020 | Med Hypotheses. 2020 Mar; 136:109512                              | non pertinent |
| 402 | Owen et al.,         | 2020 | Eur Spine J. 2020 Aug; 29(8):1887-1899                            | non pertinent |
| 403 | Oliva et al.,        | 2020 | BMJ. 2020 Mar 4; 368:m283                                         | non pertinent |
| 404 | Ogdie et al.,        | 2020 | Annals of the rheumatic diseases, 2020; 79(1):1477-               | non pertinent |
| 405 | O'Gara et al.,       | 2020 | Anesth Analg. 2020 Mar; 130(3):586-595                            | non pertinent |
| 406 | Obert et al.,        | 2020 | Scientific reports, 2020; 10(1):19444                             | non pertinent |
| 407 | Nurko et al.,        | 2020 | Gastroenterology, 2020; 158(6):161-                               | non pertinent |
| 408 | Nouri-Vaskeh et al., | 2020 | Complement Ther Med. 2020 Mar: 49:102351                          | non pertinent |
| 409 | Nord et al.,         | 2020 | Current biology, 2020                                             | non pertinent |
| 410 | Nielsen et al.,      | 2020 | Acta Anaesthesiol Scand. 2020 Mar; 64(3):368-377                  | non pertinent |
| 411 | Nguy et al.,         | 2020 | J Parkinsons Dis. 2020; 10(3):1161-1170                           | non pertinent |
| 412 | Nasb et al.,         | 2020 | BMC Musculoskelet Disord. 2020 Jan 15; 21(1):33                   | non pertinent |
| 413 | Nanda et al.,        | 2020 | Topics in antiviral medicine, 2020; 28(1):399-400                 | non pertinent |
| 414 | Naidoo et al.,       | 2020 | Journal of acquired immune deficiency syndromes, 2020             | non pertinent |

|     |                        |      |                                                                       |               |
|-----|------------------------|------|-----------------------------------------------------------------------|---------------|
| 415 | Nah et al.,            | 2020 | British journal of educational psychology, 2020                       | non pertinent |
| 416 |                        |      | Iranian journal of psychiatry and behavioral sciences, 2020;          | non pertinent |
|     | Naderi et al.,         | 2020 | 14(3)                                                                 |               |
| 417 | Mutubuki et al.,       | 2020 | Physiother Res Int. 2020 Jan; 25(1):e1796                             | non pertinent |
| 418 | Muriel-Sanchez et al., | 2020 | Journal of clinical medicine, 2020; 9(3)                              | non pertinent |
| 419 |                        |      | Pract Radiat Oncol. 2020 Nov-Dec; 10(6):e444-e451                     | non pertinent |
| 420 | Muller et al.,         | 2020 | Antimicrobial resistance and infection control, 2020; 9(1):84         | non pertinent |
| 421 | Mulder et al.,         | 2020 | BMJ Open. 2020 Jul 7; 10(7):e038430                                   | non pertinent |
| 422 | Morriss et al.,        | 2020 | Contemp Clin Trials. 2020 Mar; 90:105957                              | non pertinent |
| 423 | Morasco et al.,        | 2020 | Somatosens Mot Res. 2020 Sep; 37(3):138-148                           | non pertinent |
| 424 | Morales Tejera et al., | 2020 | Sci Rep. 2020 Jun 16; 10(1):9710                                      | non pertinent |
| 425 | Moller et al.,         | 2020 | Eur Spine J. 2020 Jun; 29(6):1410-1415                                | non pertinent |
| 426 | Miscusi et al,         | 2020 | Journal of cancer survivorship, 2020                                  | non pertinent |
| 427 | Mioduszewski et al.,   | 2020 | BMJ open, 2020; 10(5)                                                 | non pertinent |
| 428 | Metcalfe et al.,       | 2020 | Female pelvic medicine & reconstructive surgery, 2020; 26(10):159-160 | non pertinent |
| 429 | Mehta et al.,          | 2020 | JAMA Netw Open. 2020 Dec 1; 3(12):e2028328                            | non pertinent |
| 430 | Mehta et al.,          | 2020 | BMJ Open. 2020 Sep 15; 10(9):e033760                                  | non pertinent |
| 431 | McCrae et al.,         | 2020 | Journal of bone and mineral research, 2020; 35(1):245-246             | non pertinent |
| 432 | McClung et al.,        | 2020 | Clinical neurophysiology, 2020; 131(4):e136-                          | non pertinent |
| 433 | Mavromatis et al.,     | 2020 | Int J Environ Res Public Health. 2020 Sep 18; 17(18):6801             | non pertinent |
|     | Maurer et al.,         | 2020 |                                                                       |               |

|     |                           |      |                                                          |               |
|-----|---------------------------|------|----------------------------------------------------------|---------------|
| 434 | Mattia et al.,            | 2020 | BMC Neurol. 2020 Jun 27; 20(1):254                       | non pertinent |
| 435 |                           |      | Int J Environ Res Public Health. 2020 Feb 15; 17(4):1258 | non pertinent |
| 436 | Martins et al.,           | 2020 | Neuroregulation, 2020; 7(1):30-44                        | non pertinent |
| 437 | Mathew et al.,            | 2020 | Global advances in health and medicine, 2020; 9          | non pertinent |
| 438 | Mathersul et al.,         | 2020 | J Urol. 2020 Dec; 204(6):1209-1215                       | non pertinent |
| 439 | Marra et al.,             | 2020 | Diabetes Technol Ther. 2020 Jan; 22(1):25-33             | non pertinent |
| 440 | Marker et al.,            | 2020 | BMJ open, 2020; 10(6)                                    | non pertinent |
| 441 | Maranesi et al.,          | 2020 | Pain physician, 2020; 23(3):1-127                        | non pertinent |
| 442 | Manchikanti et al.,       | 2020 |                                                          |               |
| 443 | Malm et al.,              | 2020 | BMC Neurol. 2020 Aug 20; 20(1):311                       | non pertinent |
| 444 | Maier et al.,             | 2020 | Frontiers in psychiatry, 2020; 11                        | non pertinent |
| 445 | Mahanna-Gabrielli et al., | 2020 | Anesth Analg. 2020 Jun; 130(6):1516-1523                 | non pertinent |
| 446 | Madsen et al.,            | 2020 | Trials. 2020 Sep 22; 21(1):805                           | non pertinent |
| 447 | Machingaidze et al.,      | 2020 | PLoS One. 2020 Sep 28; 15(9):0239731                     | non pertinent |
| 448 | Mace et al.,              | 2020 | Gerontologist, 2020                                      | non pertinent |
| 449 | Ma et al.,                | 2020 | Circulation, 2020; 141(1)                                | non pertinent |
| 450 | Lyu et al.,               | 2020 | Orthop Surg. 2020 Oct; 12(5): 1430-1438                  | non pertinent |
| 451 | Lübke et al.,             | 2020 | Arch Sex Behav. 2020 Feb; 49(2):635-644                  | non pertinent |
| 452 | Luo et al.,               | 2020 | Neural plasticity, 2020; 2020:13                         | non pertinent |
| 453 | Lukes et al.,             | 2020 | Obstetrics and gynecology, 2020; 135:7-                  | non pertinent |
| 454 | Lui et al.,               | 2020 | Journal of general internal medicine, 2020; 35(1):574-   | non pertinent |
| 455 | Lübke et al.,             | 2020 | Archives of sexual behavior, 2020; 49(2):635-644         | non pertinent |
| 456 | Lu et al.,                | 2020 | Intern Med. 2020 Oct 15; 59(20):2471-2480                | non pertinent |
|     | Lowenstern et al.,        | 2020 | JAMA Cardiol. 2020 Feb 1; 5(2):193-201                   | non pertinent |

|     |                                        |      |                                                                                               |               |
|-----|----------------------------------------|------|-----------------------------------------------------------------------------------------------|---------------|
| 457 | Lorenzin et al.,                       | 2020 | Front Immunol.<br>2020 May 15;<br>11:936                                                      | non pertinent |
| 458 | Lopez-de-Uralde-<br>Villanueva et al., | 2020 | Musculoskelet Sci<br>Pract. 2020 Jun;<br>47:102138                                            | non pertinent |
| 459 | Loh et al.,                            | 2020 | World journal of<br>surgery, 2020;<br>44(8):2656-2666                                         | non pertinent |
| 460 | Llewellyn et al.,                      | 2020 | Neuroregulation,<br>2020; 7(4):165-<br>166                                                    | non pertinent |
| 461 | Liu et al.                             | 2020 | Chinese journal of<br>tissue engineering<br>research, 2020;<br>24(35):5688-5694               | non pertinent |
| 462 | Linnemayr et al.                       | 2020 | AIDS and<br>behavior, 2020                                                                    | non pertinent |
| 463 | Lindinger et al.,                      | 2020 | Alcoholism,<br>clinical and<br>experimental<br>research, 2020                                 | non pertinent |
| 464 | Limakatso et al.,                      | 2020 | Physiotherapy.<br>2020 Dec; 109:65-<br>74                                                     | non pertinent |
| 465 | Lim et al.,                            | 2020 | J Int Med Res.<br>2020 Apr;<br>48(4):3000605198<br>93165                                      | non pertinent |
| 466 | Lier et al.,                           | 2020 | Sci Rep. 2020 Jun<br>3; 10(1):9067                                                            | non pertinent |
| 467 | Lieberz et al.,                        | 2020 | Neuropsychophar<br>macology. 2020<br>Jun; 45(7):1134-<br>1140                                 | non pertinent |
| 468 | Liao et al.,                           | 2020 | Ann Thorac Surg.<br>2020 Mar;<br>109(3):887-893                                               | non pertinent |
| 469 | Li et al.,                             | 2020 | Arthritis Care Res<br>(Hoboken). 2020<br>Dec; 72(12):1755-<br>1765                            | non pertinent |
| 470 | Li et al.,                             | 2020 | J Tradit Chin Med.<br>2020 Dec;<br>40(6):1041-1051                                            | non pertinent |
| 471 | Li et al.,                             | 2020 | Trials. 2020 Nov<br>30; 21(1):989                                                             | non pertinent |
| 472 | Li et al.,                             | 2020 | Medical Science<br>monitor, 2020;<br>26:e926833                                               | non pertinent |
| 473 | Li et al.,                             | 2020 | Neuromodulation,<br>2020; 23(6):838-<br>846                                                   | non pertinent |
| 474 | Li et al.,                             | 2020 | Zhonggou zhen jiu<br>(Chinese<br>acupuncture &<br>moxibustion),<br>2020; 40(12):1281-<br>1285 | non pertinent |
| 475 | Letafatkar et al.,                     | 2020 | Scand J Med Sci<br>Sports. 2020 Mar;<br>30(3):429-441                                         | non pertinent |



|     |                           |      |                                                                                                                       |               |
|-----|---------------------------|------|-----------------------------------------------------------------------------------------------------------------------|---------------|
| 476 | Leiter et al.,            | 2020 | Orthopaedic<br>journal of sports<br>medicine, 2020;<br>8(9)                                                           | non pertinent |
| 477 | Lee-Archer et al.,        | 2020 | Anaesthesia. 2020<br>Nov; 75(11):1461-<br>1468                                                                        | non pertinent |
| 478 | Lee et al.,               | 2020 | Clin Implant Dent<br>Relat Res. 2020<br>Oct;22(5):622-630                                                             | non pertinent |
| 479 | Lee et al.,               | 2020 | Spine journal,<br>2020; 20(7):1114-<br>1124                                                                           | non pertinent |
| 480 | Lee et al.,               | 2020 | Clin Oral Implants<br>Res. 2020 Jan;<br>31(1):1-9                                                                     | non pertinent |
| 481 | La Touche et al.,         | 2020 | Pain Med. 2020<br>Oct 1; 21(10):2186-<br>2199                                                                         | non pertinent |
| 482 | La Touche et al.,         | 2020 | J Mot Behav.<br>2020; 52(4):444-<br>455                                                                               | non pertinent |
| 483 | Laslett et al.,           | 2020 | Trials. 2020 Jan<br>14; 21(1):79                                                                                      | non pertinent |
| 484 | Larsen et al.,            | 2020 | BMC Cancer.<br>2020 Mar 3;<br>20(1):169                                                                               | non pertinent |
| 485 | Larsen et al.,            | 2020 | Osteoarthritis and<br>cartilage, 2020;<br>28:173-                                                                     | non pertinent |
| 486 | Lannin et al.,            | 2020 | Stroke. 2020 Feb<br>51(2):556-562                                                                                     | non pertinent |
| 487 | Lange et al.,             | 2020 | Neuropsychophar<br>macology. 2020<br>Feb; 45(3):534-<br>541                                                           | non pertinent |
| 488 | Lam et al.,               | 2020 | Echocardiography<br>. 2020 Aug;<br>37(8):1199-1204                                                                    | non pertinent |
| 489 | Lakshmanan et<br>al.,     | 2020 | Journal of<br>cardiovascular<br>computed<br>tomography,<br>2020; 14(3):47-                                            | non pertinent |
| 490 | Labau et al.,             | 2020 | Brain. 2020 Mar 1;<br>143(3):771-782                                                                                  | non pertinent |
| 491 | Kwiatek et al.,           | 2020 | Internal medicine<br>journal, 2020;<br>50(2):48-49                                                                    | non pertinent |
| 492 | Kurosawa et al.,          | 2020 | Pain Med. 2020<br>Oct 1; 21(10):2105-<br>2110                                                                         | non pertinent |
| 493 | Kundranda et al.,         | 2020 | Annals of<br>oncology: offical<br>journal of the<br>european society<br>for medical<br>oncology, 2020;<br>31(1):79-87 | non pertinent |
| 494 | Krishnamoorthy<br>et al., | 2020 | J Neurosurg<br>Anesthesiol. 2020<br>Apr; 32(2):156-<br>161                                                            | non pertinent |

|     |                     |      |                                                                                                                            |               |
|-----|---------------------|------|----------------------------------------------------------------------------------------------------------------------------|---------------|
| 495 |                     |      | Proc Natl Acad Sci U S A. 2020 May 26; 117(21):11781-11787                                                                 | non pertinent |
|     | Kreuder et al.,     | 2020 |                                                                                                                            |               |
| 496 |                     |      | Appl Ergon. 2020 Jul; 86:103117                                                                                            | non pertinent |
|     | Kozinc et al.,      | 2020 |                                                                                                                            |               |
| 497 |                     |      | Psychological medicine, 2020; 1-10                                                                                         | non pertinent |
|     | Kou et al.,         | 2020 |                                                                                                                            |               |
| 498 |                     |      | Brain Stimul. 2020 May-Jun; 13(3):554-561                                                                                  | non pertinent |
|     | Kothari et al.,     | 2020 |                                                                                                                            |               |
| 499 | Korpershoek et al., | 2020 | Trials, 2020; 21(1)                                                                                                        | non pertinent |
|     |                     |      | BMC                                                                                                                        |               |
| 500 |                     |      | Musculoskelet Disord. 2020 Apr 22; 21(1):265                                                                               | non pertinent |
|     | Koppelaar et al.,   | 2020 |                                                                                                                            |               |
| 501 |                     |      | Pain Res Manag. 2020 Oct 10; 2020:1036306                                                                                  | non pertinent |
|     | Kopacz et al.,      | 2020 |                                                                                                                            |               |
| 502 |                     |      | Journal of knee surgery, 2020; <a href="https://doi.org/10.1055/s-0040-1721035">https://doi.org/10.1055/s-0040-1721035</a> | non pertinent |
|     | Kondo et al.,       | 2020 |                                                                                                                            |               |
| 503 |                     |      | Clin J Pain. 2020 Sep; 36(9):683-692                                                                                       | non pertinent |
|     | Kohns et al.,       | 2020 |                                                                                                                            |               |
| 504 |                     |      | J Am Med Dir Assoc. 2020 Nov; 21(11):1643-1650                                                                             | non pertinent |
|     | Kohnen et al.,      | 2020 |                                                                                                                            |               |
| 505 |                     |      | The lancet. Respiratory medicine, 2020; 8(5):493-505                                                                       | non pertinent |
|     | Kobbernagel et al., | 2020 |                                                                                                                            |               |
| 506 |                     |      | Journal of nutritional science and vitaminology, 2020; 66(5):417-426                                                       | non pertinent |
|     | Kitagawa et al.,    | 2020 |                                                                                                                            |               |
| 507 |                     |      | J Neurointerv Surg. 2020 Nov; 12(11):1137-1141                                                                             | non pertinent |
|     | Kim et al.,         | 2020 |                                                                                                                            |               |
| 508 |                     |      | Neuroimage. 2020 Aug 15; 217:116899                                                                                        | non pertinent |
|     | Kim et al.,         | 2020 |                                                                                                                            |               |
| 509 |                     |      | Neurosurgery. 2020 Jun 1; 86(6):825-834                                                                                    | non pertinent |
|     | Kim et al.,         | 2020 |                                                                                                                            |               |
| 510 |                     |      | Pain Med. 2020 Apr 1; 21(4):677-685                                                                                        | non pertinent |
|     | Kim et al.,         | 2020 |                                                                                                                            |               |
| 511 |                     |      | Abdom Radiol (NY). 2020 Mar; 45(3):623-631                                                                                 | non pertinent |
|     | Kim et al.,         | 2020 |                                                                                                                            |               |
| 512 |                     |      | Psychological medicine, 2020; 1-10                                                                                         | non pertinent |
|     | Kim et al.,         | 2020 |                                                                                                                            |               |
| 513 |                     |      | Integrative medicine research, 2020; 9                                                                                     | non pertinent |
|     | Kim et al.,         | 2020 |                                                                                                                            |               |

|     |                             |      |                                                                                  |               |
|-----|-----------------------------|------|----------------------------------------------------------------------------------|---------------|
| 514 | Killgore et al.,            | 2020 | Biological psychiatry, 2020; 87(9):417-                                          | non pertinent |
| 515 | Khalsa et al.,              | 2020 | Psychosomatic medicine, 2020; 82(6):A163-A164                                    | non pertinent |
| 516 | Khalifeh et al.,            | 2020 | J Matern Fetal Neonatal Med. 2020 Feb; 33(4):542-546                             | non pertinent |
| 517 | Khalifa et al.,             | 2020 | Am J Clin Nutr. 2020 Jan 1; 111(1):131-140                                       | non pertinent |
| 518 | Kempton et al.,             | 2020 | J Am Acad Orthop Surg. 2020 Sep 15; 28(18):772-779                               | non pertinent |
| 519 | Keene et al.,               | 2020 | Physiotherapy. 2020 Jun; 107:252-266                                             | non pertinent |
| 520 | Karpouzas et al.,           | 2020 | Arthritis Rheumatol. 2020 Sep; 72(9):1467-1475                                   | non pertinent |
| 521 | Karady et al.,              | 2020 | JAMA Netw Open. 2020 Dec 1; 3(12):e2028312                                       | non pertinent |
| 522 | Kalbe et al.,               | 2020 | Parkinson's disease, 2020; 2020                                                  | non pertinent |
| 523 | Kaiser et al.,              | 2020 | Br J Anaesth. 2020 Sep; 125(3):291-297                                           | non pertinent |
| 524 | Ji-Wen et al.,              | 2020 | Shanghai kou qiang yi xue [Shanghai journal of stomatology], 2020; 29(6):623-627 | non pertinent |
| 525 | Jin et al.,                 | 2020 | Osteoporos Int. 2020 Sep; 31(9):1721-1732                                        | non pertinent |
| 526 | Ji et al.,                  | 2020 | International journal of clinical and experimental medicine, 2020; 13(2):925-932 | non pertinent |
| 527 | Jarvik et al.,              | 2020 | JAMA Netw Open. 2020 Sep 1; 3(9):e2015713                                        | non pertinent |
| 528 | Jaikaran et al.,            | 2020 | BMJ case reports, 2020; 13(12)                                                   | non pertinent |
| 529 | Izquierdo-Alventosa et al., | 2020 | Int J Environ Res Public Health. 2020 May 21; 17(10):3634                        | non pertinent |
| 530 | Ispirgil et al.,            | 2020 | Cranio. 2020 Mar; 38(2):99-108                                                   | non pertinent |
| 531 | Ismail et al.,              | 2020 | Chest, 2020; 158(4):A2075-A2076                                                  | non pertinent |
| 532 | Ishii et al.,               | 2020 | Acta Med Okayama. 2020 Feb; 74(1):17-26                                          | non pertinent |

|     |                      |      |                                                                |               |
|-----|----------------------|------|----------------------------------------------------------------|---------------|
| 533 | Iljazi et al.,       | 2020 | Cephalalgia. 2020 Jul; 40(8):818-827                           | non pertinent |
| 534 | Imam et al.,         | 2020 | Journal of shoulder and elbow surgery, 2020; 29(10):2015-2026  | non pertinent |
| 535 | Hwang et al.,        | 2020 | Knee Surg Sports Traumatol Arthrosc. 2020 Jul; 28(7):2343-2353 | non pertinent |
| 536 | Hurd et al.,         | 2020 | J Orthop Surg Res. 2020 Mar 30; 15(1):122                      | non pertinent |
| 537 | Huh et al.,          | 2020 | Medicine (Baltimore). 2020 Jan; 99(5):e18441                   | ongoing       |
| 538 | Houde et al.,        | 2020 | Neurobiol Learn Mem. 2020 Mar; 169:107174                      | non pertinent |
| 539 | Houbiers et al.,     | 2020 | World journal of urology, 2020                                 | non pertinent |
| 540 | Hosseinzadeh et al., | 2020 | Clinical orthopaedics and related research, 2020               | non pertinent |
| 541 | Hosomi et al.,       | 2020 | Pain. 2020 Feb; 161(2):351-360                                 | non pertinent |
| 542 | Hood et al.,         | 2020 | Blood, 2020; 136(1):57-58                                      | non pertinent |
| 543 | Hong et al.,         | 2020 | Dermatol Surg. 2020 Feb; 46(2):213-219                         | non pertinent |
| 544 | Holmberg et al.,     | 2020 | Spine (Phila Pa 1976). 2020 Dec 15; 45(24):1751-1757           | non pertinent |
| 545 | Holden et al.,       | 2020 | Rheumatology (united kingdom), 2020; 59:ii65-ii66              | non pertinent |
| 546 | Holden et al.,       | 2020 | Osteoarthritis and cartilage, 2020; 28:499-                    | non pertinent |
| 547 | Hill et al.,         | 2020 | Diseases of the colon and rectum, 2020; 63(6):e325-e326        | non pertinent |
| 548 | Herzig et al.,       | 2020 | Scandinavian journal of pain, 2020                             | non pertinent |
| 549 | Henry et al.,        | 2020 | Journal of general internal medicine, 2020; 35(1):104-         | non pertinent |
| 550 | Henrich et al.,      | 2020 | J Consult Clin Psychol. 2020 Apr; 88(4):295-310                | non pertinent |
| 551 | Hemani et al.,       | 2020 | Neuromodulation, 2020; 23(3):e320-                             | non pertinent |
| 552 | Herzog et al.,       | 2020 | Danish medical journal, 2020; 67(1)                            | non pertinent |

|     |                       |      |                                                                              |               |
|-----|-----------------------|------|------------------------------------------------------------------------------|---------------|
| 553 | Hedstrom et al.,      | 2020 | Pancreatology, 2020; 20:86-87                                                | non pertinent |
| 554 | Heany et al.,         | 2020 | Experimental brain research, 2020; 238(3):751-759                            | non pertinent |
| 555 | He et al.,            | 2020 | Osteoarthritis and cartilage, 2020; 28:57-                                   | non pertinent |
| 556 | Hauser-Ulrich et al., | 2020 | JMIR Mhealth Uhealth. 2020 Apr 3; 8(4):e15806                                | non pertinent |
| 557 | Hasegawa et al.,      | 2020 | Spine (Phila Pa 1976). 2020 Aug 1; 45(15):E892-E902                          | non pertinent |
| 558 | Hagiwata et al.,      | 2020 | Brain Stimul. 2020 Jan-Feb; 13(1):60-68                                      | non pertinent |
| 559 | Hack et al.,          | 2020 | Breast. 2020 Apr; 50:11-18                                                   | non pertinent |
| 560 | Guiote Moreno et al., | 2020 | European journal of nuclear medicine and molecular imaging, 2020; 47(1):533- | non pertinent |
| 561 | Guensch et al.,       | 2020 | J Am Heart Assoc. 2020 Mar 3; 9(5):e014739                                   | non pertinent |
| 562 | Guangming             | 2020 | Journal of digestive diseases, 2020; 21(1):30-                               | non pertinent |
| 563 | Gu et al.,            | 2020 | Medical science monitor, 2020; 26                                            | non pertinent |
| 564 | Green et al.,         | 2020 | Postgraduate medicine, 2020; 132(1):19-21                                    | non pertinent |
| 565 | Gratzke et al.,       | 2020 | Journal for immunotherapy of cancer, 2020; 8(3):A211-                        | non pertinent |
| 566 | Graff et al.,         | 2020 | Journal for immunotherapy of cancer, 2020; 8(3):A210-                        | non pertinent |
| 567 | Graff et al.,         | 2020 | Journal of clinical oncology, 2020; 38(6)                                    | non pertinent |
| 568 | Goudman et al.,       | 2020 | Neuromodulation. 2020 Jan; 23(1):74-81                                       | non pertinent |
| 569 | Gossrau et al.,       | 2020 | Pain Med. 2020 Oct 1; 21(10):2546-2551                                       | non pertinent |
| 570 | Gorka et al.,         | 2020 | Psychopharmacology (Berl). 2020 Jun; 237(6):1873-1883                        | non pertinent |
| 571 | Goldstein et al.,     | 2020 | Neurotherapeutics . 2020 Jul; 17(3):774-783                                  | non pertinent |

|     |                       |      |                                                                    |               |
|-----|-----------------------|------|--------------------------------------------------------------------|---------------|
| 572 | Gkolias et al.,       | 2020 | Eur J Pain. 2020 Oct; 24(9):1716-1729                              | non pertinent |
| 573 | Gitlin et al.,        | 2020 | Anesthesiology. 2020 Nov 1; 133(5):1021-1028                       | non pertinent |
| 574 | Gilmore et al.,       | 2020 | Neuromodulation, 2020; 23(3):e48-e49                               | non pertinent |
| 575 | Gilbert et al.,       | 2020 | Biol Psychiatry Cogn Neurosci Neuroimaging. 2020 Mar; 5(3):354-363 | non pertinent |
| 576 | Gjefsen et al.,       | 2020 | BMC musculoskeletal disorders, 2020; 21(1)                         | non pertinent |
| 577 | Gillespie et al.,     | 2020 | Pilot and feasibility studies, 2020; 6(1)                          | non pertinent |
| 578 | Ghelman et al.,       | 2020 | Brain Behav. 2020 Apr; 10(4):e01590                                | non pertinent |
| 579 | Ghanizada et al.,     | 2020 | J Headache Pain. 2020 Feb 24; 21(1):19                             | non pertinent |
| 580 | Gezginaslan et al.,   | 2020 | Archives of rheumatology, 2020; 35(1):78-89                        | non pertinent |
| 581 | Gelauff et al.,       | 2020 | Parkinsonism Relat Disord. 2020 Jan; 70:1-6                        | non pertinent |
| 582 | Garen et al.,         | 2020 | Annals of the rheumatic diseases, 2020; 79(1):1278-1279            | non pertinent |
| 583 | Garcia-Azorin et al., | 2020 | Medicine (Baltimore). 2020 Jul 17; 99(29):e20900                   | non pertinent |
| 584 | Ganesh et al.,        | 2020 | BMJ Open. 2020 Oct 14; 10(10):e040466                              | non pertinent |
| 585 | Ganer Herman et al.,  | 2020 | Obstet Gynecol. 2020 Jun; 135(6):1345-1352                         | non pertinent |
| 586 | Gamba et al.,         | 2020 | Foot Ankle Int. 2020 Mar; 41(3):267-274                            | non pertinent |
| 587 | Frey et al.,          | 2020 | Neuropsychopharmacology, 2020; 45(9):1431-1437                     | non pertinent |
| 588 | Franettovich et al.,  | 2020 | J Foot Ankle Res. 2020 May 8; 13(1):20                             | non pertinent |
| 589 | Foster et al.,        | 2020 | Health Technol Assess. 2020 Oct; 24(49):1-130                      | non pertinent |
| 590 | Fitzpatrick et al.,   | 2020 | Drug design, development and therapy, 2020; 14:2707-2713           | non pertinent |

|     |                     |      |                                                                    |                   |
|-----|---------------------|------|--------------------------------------------------------------------|-------------------|
| 591 | Fitzke et al.,      | 2020 | United european gastroenterology journal, 2020; 8(8):548-          | non pertinent     |
| 592 | Fillingim et al.,   | 2020 | Contemporary clinical trials, 2020; 98                             | not published yet |
| 593 | Ferdinandov et al., | 2020 | Revmatologiya (bulgaria), 2020; 28(3):39-53                        | not published yet |
| 594 | Farrokhi et al.,    | 2020 | Pain medicine (Malden, Mass.), 2020; 21(2):45-52                   | non pertinent     |
| 595 | Faridi et al.,      | 2020 | Circ Cardiovasc Qual Outcomes. 2020 Mar; 13(3):e006275             | non pertinent     |
| 596 | Fan et al.,         | 2020 | J Thorac Cardiovasc Surg. 2020 Aug; 160(2):532-539.e2              | non pertinent     |
| 597 | Elmallawany et al., | 2020 | Open access macedonian journal of medical science, 2020; 8:807-814 | trial ongoing     |
| 598 | Eckerdal et al.,    | 2020 | Anesth Analg. 2020 Mar; 130(3):615-624                             | trial ongoing     |
| 599 | Ebrahimi et al.,    | 2020 | Neuropsychopharmacology. 2020 Feb; 45(3):499-506                   | no results posted |
| 600 | Durst et al.,       | 2020 | Osteoarthritis and cartilage, 2020; 28:463-                        | study ongoing     |
| 601 | Duff et al.,        | 2020 | Lancet Digit Health. 2020 Aug 24; 2(9):e458-e467                   | trial ongoing     |
| 602 | Drukker et al.,     | 2020 | Journal of psychosomatic research, 2020; 139                       | trial ongoing     |
| 603 | Drechsler et al.,   | 2020 | Nephrology dialysis transplantation, 2020; 35(3):iii351-           | non pertinent     |
| 604 | Douglas et al.,     | 2020 | Chest. 2020 Oct; 158(4): 1431-1445                                 | trial ongoing     |
| 605 | Dory et al.,        | 2020 | Academic medicine, 2020                                            | trial ongoing     |
| 606 | Donthula et al.,    | 2020 | Clin Orthop Relat Res. 2020 Feb; 478(2):381-388                    | trial ongoing     |
| 607 | Dindo et al.,       | 2020 | Contemp Clin Trials. 2020 Mar; 90:105954                           | non pertinent     |
| 608 | Dieras et al.,      | 2020 | The lancet. Oncology, 2020; 21(10):1269-1282                       | non pertinent     |

|     |                     |      |                                                                      |               |
|-----|---------------------|------|----------------------------------------------------------------------|---------------|
| 609 |                     |      | United european gastroenterology journal, 2020; 8(8):409-410         | trial ongoing |
|     | D'Haens et al.,     | 2020 |                                                                      |               |
| 610 |                     |      | Gastroenterology, 2020; 158(6):437                                   | not published |
|     | D'Haens et al.,     | 2020 |                                                                      |               |
| 611 |                     |      | Phys Ther. 2020 Feb 7; 100(2):268-282                                | not published |
|     | de Zoete et al.,    | 2020 |                                                                      |               |
| 612 |                     |      | Pakistan journal of medical and health sciences, 2020; 14(2):701-704 | non pertinent |
|     | Dezfuli et al.,     | 2020 |                                                                      |               |
| 613 |                     |      | Brain Struct Funct. 2020 Jan; 225(1):161-172                         | trial ongoing |
|     | DeSouza et al.,     | 2020 |                                                                      |               |
| 614 |                     |      | Journal of cachexia, sarcopenia and muscle, 2020                     | non pertinent |
|     | Derksen et al.,     | 2020 |                                                                      |               |
| 615 |                     |      | Trials, 2020; 10(7)                                                  | non pertinent |
|     | Depaulis et al.,    | 2020 |                                                                      |               |
| 616 |                     |      | Sci Rep. 2020 Nov 3; 10(1):18955                                     | trial ongoing |
|     | de Melo et al.,     | 2020 |                                                                      |               |
| 617 |                     |      | Neuromodulation. 2020 Jan; 23(1):46-55                               | trial ongoing |
|     | De Groote et al.,   | 2020 |                                                                      |               |
| 618 |                     |      | Hellenic J Cardiol. 2020 Jan-Feb; 61(1):42-45                        | trial ongoing |
|     | Deftereos et al.,   | 2020 |                                                                      |               |
| 619 |                     |      | Contemp Clin Trials. 2020 Jun; 93:106000                             | trial ongoing |
|     | Day et al.,         | 2020 |                                                                      |               |
| 620 |                     |      | J Pain. 2020 Jan-Feb; 21(1-2):161-169                                | non pertinent |
|     | Day et al.,         | 2020 |                                                                      |               |
| 621 |                     |      | Transl Psychiatry. 2020 Sep 13; 10(1):311                            | trial ongoing |
|     | Davies et al.,      | 2020 |                                                                      |               |
| 622 |                     |      | Am J Emerg Med. 2020 Dec; 38(12):2759.e1-2759.e4                     | non pertinent |
|     | Darracq             | 2020 |                                                                      |               |
| 623 |                     |      | Pain Med. 2020 Aug 1; 21(8):1523-1531                                | non pertinent |
|     | Darnall et al.,     | 2020 |                                                                      |               |
| 624 |                     |      | Sci Rep. 2020 Dec 14; 10(1):21840                                    | trial ongoing |
|     | Daniel et al.,      | 2020 |                                                                      |               |
| 625 |                     |      | J Med Internet Res. 2020 Aug 4; 22(8):e19216                         | non pertinent |
|     | Damschroder et al., | 2020 |                                                                      |               |
| 626 |                     |      | Frontiers in neurology, 2020, 11                                     | trial ongoing |
|     | Dalla Volta et al.  | 2020 |                                                                      |               |
| 627 |                     |      | Brain Stimul. 2020 Nov-Dec; 13(6):1697-1705                          | non pertinent |
|     | Dafsari et al.,     | 2020 |                                                                      |               |
| 628 |                     |      | Pharmacopsychiatry, 2020; 53(2):92                                   | trial ongoing |
|     | Cybinski et al.,    | 2020 |                                                                      |               |



|     |                     |      |                                                                        |               |
|-----|---------------------|------|------------------------------------------------------------------------|---------------|
| 629 |                     |      | Arthritis and<br>rheumatology,<br>2020; 72(10):2205-<br>2207           | trial ongoing |
|     | Courties et al.,    | 2020 |                                                                        |               |
| 630 |                     |      | Br J Clin<br>Pharmacol. 2020<br>Jul; 86(7):1387-<br>1397               | non pertinent |
|     | Cormack et al.,     | 2020 |                                                                        |               |
| 631 |                     |      | J Headache Pain.<br>2020 Jan 16;<br>21(1):6                            | non pertinent |
|     | Corbelli et al.,    | 2020 |                                                                        |               |
| 632 |                     |      | Chest, 2020;<br>158(4):A1861-                                          | trial ongoing |
|     | Clinton et al.,     | 2020 |                                                                        |               |
| 633 |                     |      | Translational<br>psychiatry, 2020;<br>10(1)                            | trial ongoing |
|     | Cisler et al.,      | 2020 |                                                                        |               |
| 634 |                     |      | J Med Internet<br>Res. 2020 Oct 2;<br>22(10):e17526                    | non pertinent |
|     | Cillessen et al.,   | 2020 |                                                                        |               |
| 635 |                     |      | Gastrointestinal<br>endoscopy, 2020;<br>91(6):AB187-<br>AB188          | non pertinent |
|     | Cho et al.,         | 2020 |                                                                        |               |
| 636 |                     |      | Archives of the<br>balkan medical<br>union, 2020;<br>55(4):634-641     | non pertinent |
|     | Chihai et al.       | 2020 |                                                                        |               |
| 637 |                     |      | Complement Ther<br>Clin Pract. 2020<br>Nov; 41:101254                  | non pertinent |
|     | Cheung et al.,      | 2020 |                                                                        |               |
| 638 |                     |      | BMC Public<br>Health. 2020 Sep<br>1; 20(1):1332                        | non pertinent |
|     | Chen et al.,        | 2020 |                                                                        |               |
| 639 |                     |      | European journal<br>of pharmaceutical<br>sciences, 2020;<br>151:105384 | non pertinent |
|     | Chen et al.,        | 2020 |                                                                        |               |
| 640 |                     |      | Neuropsychophar<br>macology, 2020;<br>45(12):2070-2078                 | non pertinent |
|     | Chen et al.,        | 2020 |                                                                        |               |
| 641 |                     |      | International<br>journal of spine<br>surgery, 2020;<br>14(6):924-935   | trial ongoing |
|     | Chatterjee et al.,  | 2020 |                                                                        |               |
| 642 |                     |      | J Med Internet<br>Res. 2020 May 20;<br>22(5):e18537                    | trial ongoing |
|     | Chai et al.,        | 2020 |                                                                        |               |
| 643 |                     |      | Sci Rep. 2020 Feb<br>21; 10(1):3214                                    | trial ongoing |
|     | Cerritelli et al.,  | 2020 |                                                                        |               |
| 644 |                     |      | Stem cells<br>international,<br>2020; 2020                             | non pertinent |
|     | Centeno et al.,     | 2020 |                                                                        |               |
| 645 |                     |      | Annals of the<br>rheumatic<br>diseases, 2020                           | non pertinent |
|     | Cederqvist et al.,  | 2020 |                                                                        |               |
| 646 |                     |      | Pain practice,<br>2020; 20(1):67-                                      | non pertinent |
|     | Cedeno et al.,      | 2020 |                                                                        |               |
| 647 |                     |      | Abdom Radiol<br>(NY). 2020 Apr;<br>45(4):1162-1173                     | trial ongoing |
|     | Castiglione et al., | 2020 |                                                                        |               |
| 648 |                     |      | Biological<br>psychiatry, 2020;<br>87(9):128-                          | non pertinent |
|     | Cassano             | 2020 |                                                                        |               |

|     |                      |      |                                                          |               |
|-----|----------------------|------|----------------------------------------------------------|---------------|
| 649 |                      |      | J Head Trauma Rehabil. 2020 Nov/Dec; 35(6):E513-E523     | non pertinent |
|     | Carroll et al.,      | 2020 | New England journal of medicine, 2020; 382(13):1219-1231 | trial ongoing |
| 650 | Cappellini et al.,   | 2020 | Musculoskelet Sci Pract. 2020 Apr; 46:102108             | non pertinent |
| 651 | Calixtre et al.,     | 2020 | JAMA. 2020 Apr 21; 323(15):1456-1466                     | non pertinent |
| 652 | Cai et al.,          | 2020 | Osteoarthritis and cartilage, 2020; 28:265-              | non pertinent |
| 653 | Cai et al.,          | 2020 | J Telemed Telecare. 2020 Dec; 26(10):619-626             | non pertinent |
| 654 | Bushey et al.,       | 2020 | Horm Behav. 2020 Sep; 125:104837                         | non pertinent |
| 655 | Burley et al.,       | 2020 | Neuropsychopharmacology. 2020 Feb; 45(3):561-569         | non pertinent |
| 656 | Burkhouse et al.,    | 2020 | Eur Radiol. 2020 Nov; 30(11):5933-5941                   | non pertinent |
| 657 | Bureau et al.,       | 2020 | Journal of clinical medicine, 2020; 9(11):1-14           | non pertinent |
| 658 | Brownstein et al.,   | 2020 | Psychosomatic medicine, 2020; 82(7):708-714              | non pertinent |
| 659 | Bräscher et al.,     | 2020 | BMJ open, 2020; 10(9):e040985-                           | non pertinent |
| 660 | Brandt et al.,       | 2020 | BMC urology, 2020; 20(1):67                              | non pertinent |
| 661 | Bozzini et al.,      | 2020 | Brain stimulation, 2020; 13(4):1059-1068                 | non pertinent |
| 662 | Boroda et al.,       | 2020 | Annals of oncology, 2020; 31:1152                        | non pertinent |
| 663 | Borg et al.,         | 2020 | J Cyst Fibros. 2020 Jul; 19(4):562-568                   | non pertinent |
| 664 | Boon et al.,         | 2020 | Neuropharmacology. 2020 Jul; 171:108105                  | non pertinent |
| 665 | Boll et al.,         | 2020 | Spine J. 2020 Feb; 20(2):292-299                         | non pertinent |
| 666 | Bossioneault et al., | 2020 | Drug Alcohol Depend. 2020 Feb 1; 207:107811              | non pertinent |
| 667 | Boissoneault et al., | 2020 | BMJ open, 2020; 10(8)                                    | non pertinent |
| 668 | Boertien et al.,     | 2020 |                                                          |               |

|     |                     |      |                                                                                          |               |
|-----|---------------------|------|------------------------------------------------------------------------------------------|---------------|
| 669 | Bodily et al.,      | 2020 | Journal of pain management, 2020; 13(2):149-166                                          | non pertinent |
| 670 | Bismuth et al.,     | 2020 | Neuropsychologie clinique, 2020; 50(1):5-20                                              | non pertinent |
| 671 | Bezalel et al.,     | 2020 | Diabetes technology & therapeutics, 2020; 22:A148-A149                                   | non pertinent |
| 672 | Berry-Kravis et al. | 2020 | Journal of the American Academy of Child and Adolescent Psychiatry, 2020; 59(10):265-269 | non pertinent |
| 673 | Bernardi et al.,    | 2020 | Ann Surg. 2020 Mar; 271(3):434-439                                                       | non pertinent |
| 674 | Bernard et al.,     | 2020 | Annals of the rheumatic diseases, 2020; 79(1):794-795                                    | non pertinent |
| 675 | Benson et al.,      | 2020 | Brain Behav Immun. 2020 Aug; 88:294-301                                                  | non pertinent |
| 676 | Benavides et al.,   | 2020 | Pain. 2020 Mar; 161(3):619-629                                                           | non pertinent |
| 677 | Becker et al.,      | 2020 | Drug Alcohol Depend. 2020 Jul 1; 212:108062                                              | non pertinent |
| 678 | Beall et al.,       | 2020 | International journal of spine surgery, 2020; 14(2):239-253                              | non pertinent |
| 679 | Baraliakos et al.,  | 2020 | Annals of the rheumatic diseases, 2020; 79(1):67-68                                      | non pertinent |
| 680 | Balocco et al.,     | 2020 | Regional anesthesia and pain medicine, 2020                                              | non pertinent |
| 681 | Balderston et al.,  | 2020 | Translational psychiatry, 2020; 10(1)                                                    | non pertinent |
| 682 | Balderston et al.,  | 2020 | Neuropsychopharmacology. 2020 Mar; 45(4):694-702                                         | non pertinent |
| 683 | Baettig et al.,     | 2020 | Brain imaging and behavior, 2020; 14(6):2073-2083                                        | non pertinent |
| 684 | Bae et al.          | 2020 | Toxins, 2020; 12(9)                                                                      | non pertinent |
| 685 | Badran et al.,      | 2020 | Brain Stimul. 2020 Nov-Dec; 13(6):1805-1812                                              | non pertinent |

|     |                            |      |                                                                                                                                                        |               |
|-----|----------------------------|------|--------------------------------------------------------------------------------------------------------------------------------------------------------|---------------|
| 686 |                            |      | European archives of psychiatry and clinical neuroscience, 2020                                                                                        | non pertinent |
|     | Bach et al.,               | 2020 |                                                                                                                                                        |               |
| 687 | Azabou et al.,             | 2020 | Frontiers in medicine, 2020; 7                                                                                                                         | non pertinent |
| 688 |                            |      | Journal for immunotherapy of cancer, 2020; 8(2)                                                                                                        | non pertinent |
|     | Awada et al.,              | 2020 |                                                                                                                                                        |               |
| 689 |                            |      | Clin Neurophysiol. 2020 May; 131(5):1059-1067                                                                                                          | non pertinent |
|     | Awad et al.,               | 2020 |                                                                                                                                                        |               |
| 690 |                            |      | Fertility and sterility, 2020; 114(3):e77-                                                                                                             | non pertinent |
|     | As-Sanie et al.,           | 2020 |                                                                                                                                                        |               |
| 691 |                            |      | BMC neurology, 2020; 20(1):133                                                                                                                         | non pertinent |
|     | Araneda et al.,            | 2020 |                                                                                                                                                        |               |
| 692 |                            |      | Scand J Rheumatol. 2020 Jul; 49(4):312-322                                                                                                             | non pertinent |
|     | Andreasen et al.,          | 2020 |                                                                                                                                                        |               |
| 693 |                            |      | Anesth Analg. 2020 Apr; 130(4):1045-1053                                                                                                               | non pertinent |
|     | Anderson et al.,           | 2020 |                                                                                                                                                        |               |
| 694 |                            |      | BJS Open, 2020                                                                                                                                         | non pertinent |
|     | Ali et al.,                | 2020 |                                                                                                                                                        |               |
| 695 |                            |      | Fertility and sterility, 2020; 114(3); <a href="https://doi.org/10.1016/j.fertnstert.2020.08.259">https://doi.org/10.1016/j.fertnstert.2020.08.259</a> | non pertinent |
|     | Al-Hendy et al.,           | 2020 |                                                                                                                                                        |               |
| 696 | Alakhdar Mohmara et al.,   | 2020 | Sci Rep. 2020 Apr 16; 10(1):6503                                                                                                                       | non pertinent |
| 697 |                            |      | Annals of the rheumatic diseases, 2020; 79(1):924-                                                                                                     | non pertinent |
|     | Ailioaie et al.,           | 2020 |                                                                                                                                                        |               |
| 698 |                            |      | Brain sciences, 2020; 10(11):1-10                                                                                                                      | non pertinent |
|     | Antal et al.,              | 2020 |                                                                                                                                                        |               |
| 699 |                            |      | Scandinavian journal of rheumatology, 2020; 49(4):312-322                                                                                              | non pertinent |
|     | Andreasen et al.,          | 2020 |                                                                                                                                                        |               |
| 700 |                            |      | J Clin Neurosci. 2020 Jul; 77:128-133                                                                                                                  | non pertinent |
|     | Ahn et al.,                | 2020 |                                                                                                                                                        |               |
| 701 |                            |      | Neurogastroenterology and motility, 2020; 32                                                                                                           | non pertinent |
|     | Aguilera-Lizarraga et al., | 2020 |                                                                                                                                                        |               |
| 702 | Nct – Yeh                  | 2018 | National library of Medicine. 2018                                                                                                                     | non pertinent |
| 703 | Nct – Paravlic et al.,     | 2018 | PLoS One. 2019 Aug; 14(8):e0221089                                                                                                                     | non pertinent |
| 704 | Nct – Danneels             | 2018 | National library of Medicine. 2018                                                                                                                     | non pertinent |
| 705 | Nct – Tahan                | 2018 | National library of Medicine. 2018                                                                                                                     | non pertinent |
| 706 | Nct – Osmanlliu            | 2018 | National library of Medicine. 2018                                                                                                                     | non pertinent |

|     |                                              |      |                                         |               |
|-----|----------------------------------------------|------|-----------------------------------------|---------------|
| 707 | Nct – Yu                                     | 2018 | National library of Medicine. 2018      | non pertinent |
| 708 | Nct – Campbell-Yeo                           | 2018 | National library of Medicine. 2018      | non pertinent |
| 709 | Nct – Duymaz                                 | 2018 | National library of Medicine. 2018      | non pertinent |
| 710 | Nct – Gaudreault                             | 2018 | National library of Medicine. 2018      | non pertinent |
| 711 | Nct – Kong                                   | 2018 | National library of Medicine. 2018      | non pertinent |
| 712 | Nct – Lekander                               | 2018 | National library of Medicine. 2018      | non pertinent |
| 713 | Nct – Shalvata Mental Health Center          | 2018 | National library of Medicine. 2018      | non pertinent |
| 714 | Nct – Berna                                  | 2018 | National library of Medicine. 2018      | non pertinent |
| 715 | Nct – Ismail                                 | 2018 | National library of Medicine. 2018      | non pertinent |
| 716 | Nct – Lekander                               | 2018 | National library of Medicine. 2018      | non pertinent |
| 717 | Nct – Tang                                   | 2018 | National library of Medicine. 2018      | non pertinent |
| 718 | Nct – Hanlon                                 | 2018 | National library of Medicine. 2018      | non pertinent |
| 719 | Nct – Greenwald                              | 2018 | National library of Medicine. 2018      | non pertinent |
| 720 | Nct – Schnitzer                              | 2018 | National library of Medicine. 2018      | non pertinent |
| 721 | Nct – Lavigne                                | 2018 | National library of Medicine. 2018      | non pertinent |
| 722 | Nct – Karris                                 | 2018 | National library of Medicine. 2018      | non pertinent |
| 723 | Nct – Wong                                   | 2018 | National library of Medicine. 2018      | non pertinent |
| 724 | Nct – Karlsten                               | 2018 | National library of Medicine. 2018      | non pertinent |
| 725 | Nct – The Leeds Teaching Hospitals NHS Trust | 2018 | National library of Medicine. 2018      | non pertinent |
| 726 | Nct – Straudi                                | 2018 | National library of Medicine. 2018      | non pertinent |
| 727 | Nct – Silva                                  | 2018 | National library of Medicine. 2018      | non pertinent |
| 728 | Nct – Sahlem                                 | 2018 | National library of Medicine. 2018      | non pertinent |
| 729 | Nct – Kong                                   | 2018 | National library of Medicine. 2018      | non pertinent |
| 730 | Nct – Ch'ang                                 | 2018 | National library of Medicine. 2018      | non pertinent |
| 731 | Nct – France et al.,                         | 2018 | Contemp Clin Trials. 2018 Jun; 69:83-91 | non pertinent |
| 732 | Nct – Harmer                                 | 2018 | National library of Medicine. 2018      | non pertinent |
| 733 | Nct – McKee et al.,                          | 2018 | Urology. 2019 Nov; 133:72-77            | non pertinent |
| 734 | Nct – Chan et al.,                           | 2018 | PLoS One. 2018 Jul; 13(7):e0200987      | non pertinent |

|     |                      |      |                                                                                      |               |
|-----|----------------------|------|--------------------------------------------------------------------------------------|---------------|
| 735 | Nasir et al.,        | 2018 | J of the european academy of dermatology and venereology: JEADV. 2018; 32(1):145-151 | non pertinent |
| 736 | Nam et al.,          | 2018 | Drug design, development an therapy. 2018; 12:1413-1420                              | non pertinent |
| 737 | Naganuma et al.,     | 2018 | Gastroenterology. 2018; 154(4):935-947                                               | non pertinent |
| 738 | Mutti-Packer et al., | 2018 | BMC Public Health. 2018; 18(1):1361                                                  | non pertinent |
| 739 | Murina et al.,       | 2018 | European j of obstetric, gynecology and reproductive biology. 2018; 228:148-153      | non pertinent |
| 740 | Morgan et al.,       | 2018 | European j of applied physiology. 2018; 118(3):595-605                               | non pertinent |
| 741 | Mombelli et al.,     | 2018 | Vaccine. 2018; 36(41):6163-6169                                                      | non pertinent |
| 742 | Moghim et al.,       | 2018 | J of basic and clinical physiology and pharmacology. 2018; 29(4):321-327             | non pertinent |
| 743 | Mitchell et al.,     | 2018 | JAMA internal medicine. 2018; 178(5):681-690                                         | non pertinent |
| 744 | Miskowiak et al.,    | 2018 | Acta psychiatrica Scandinavica. 2018; 138(4):336-347                                 | non pertinent |
| 745 | Miki et al.,         | 2018 | J of orthopaedic science. 2018; 23(3):483-487                                        | non pertinent |
| 746 | Messing et al.,      | 2018 | JAMA – j of the american medical association. 2018; 319(18):1880-1888                | non pertinent |
| 747 | Merz et al.,         | 2018 | Neuropsychopharmacology. 2018; 43(2):384-392                                         | non pertinent |
| 748 | Merrill et al.,      | 2018 | Arthritis & rheumatology (hoboken N.J.). 2018; 70(2):266-276                         | non pertinent |
| 749 | Merlin et al.,       | 2018 | AIDS Behav. 2018; 22(8):2733-2742                                                    | non pertinent |
| 750 | Meitzer et al.,      | 2018 | JAMA internal medicine. 2018; 178(8):1051-1057                                       | non pertinent |

|     |                     |      |                                                                       |               |
|-----|---------------------|------|-----------------------------------------------------------------------|---------------|
| 751 | Meijer et al.,      | 2018 | JAMA – j of the american medical association. 2018; 320(19):2010-2019 | non pertinent |
| 752 | Meier et al.,       | 2018 | Phytomedicine. 2018; 39:85-92                                         | non pertinent |
| 753 | Mehta et al.,       | 2018 | Ophthalmology retinal. 2018; 2(4):268-275                             | non pertinent |
| 754 | Mehta et al.,       | 2018 | J of clinical and experimental hepatology. 2018; 8(3):224-234         | non pertinent |
| 755 | McGuire et al.,     | 2018 | American j of psychiatry. 2018; 175(3):225-231                        | non pertinent |
| 756 | McCrae et al.,      | 2018 | J of clinical sleep medicine. 2018; 14(9):1595-1603                   | non pertinent |
| 757 | Mayer-Davis et al., | 2018 | The lancet. Child & adolescent health. 2018; 2(9):635-646             | non pertinent |
| 758 | Mascarenhas et al., | 2018 | JAMA oncology. 2018; 4(5):652-659                                     | non pertinent |
| 759 | Maruani et al.,     | 2018 | Trials. 2018; 19(1)                                                   | non pertinent |
| 760 | Martinsen et al.,   | 2018 | Clin Physiol Funct Imaging. 2018; 38(3):508-516                       | non pertinent |
| 761 | Martinez et al.,    | 2018 | Blood. 2018; 132                                                      | non pertinent |
| 762 | Mariano et al.,     | 2018 | Biological psychiatry. 2018; 83(9):200-201                            | non pertinent |
| 763 | Mao et al.,         | 2018 | Medical science monitor. 2018; 24:2928-2936                           | non pertinent |
| 764 | Malfliet et al.,    | 2018 | Pain physician. 2018; 21(1):E13-e24                                   | non pertinent |
| 765 | Luo et al.,         | 2018 | Neuroimage. 2018; 171:311-322                                         | non pertinent |
| 766 | Ludvik et al.,      | 2018 | The lancet. Diabetes & endocrinology. 2018; 6(5):370-381              | non pertinent |
| 767 | Luc-Harkey et al.,  | 2018 | BMC musculoskeletal disorders. 2018; 19(1):258                        | non pertinent |
| 768 | Luc-Harkey et al.,  | 2018 | Osteoarthritis and cartilage. 2018; 26:406-407                        | non pertinent |
| 769 | Lubega et al.,      | 2018 | Scandinavian j of pain. 2018; 18(1):19-27                             | non pertinent |
| 770 | Lou et al.,         | 2018 | Hong kong j of paediatrics. 2018; 23(1):116-                          | non pertinent |

|     |                    |      |                                                                                    |               |
|-----|--------------------|------|------------------------------------------------------------------------------------|---------------|
| 771 | Lopresti et al.,   | 2018 | J of affective disorders. 2018; 232:349-357                                        | non pertinent |
| 772 | Lönndahl et al.,   | 2018 | Acta dermatovenereologica. 2018; 98(3):324-328                                     | non pertinent |
| 773 | Liou et al.,       | 2018 | Gastroenterology. 2018; 155(4):1109-1119                                           | non pertinent |
| 774 | Lin et al.,        | 2018 | Diseases of the colon and rectum. 2018; 61(5):e267-e268                            | non pertinent |
| 775 | Lim et al.,        | 2018 | Orthop Res. 2018; 36(3):913-920                                                    | non pertinent |
| 776 | Lichtman et al.,   | 2018 | Circulation. 2018; 137(8):781-790                                                  | non pertinent |
| 777 | Libzon et al.,     | 2018 | J of child neurology. 2018; 33(9):565-571                                          | non pertinent |
| 778 | Liang et al.,      | 2018 | Neuroinformatics. 2018; 16(3-4):403-410                                            | non pertinent |
| 779 | Li et al.,         | 2018 | Future oncology (london, england). 2018; 14(20):2031-2044                          | non pertinent |
| 780 | Li et al.,         | 2018 | Peerj. 2018(6)                                                                     | non pertinent |
| 781 | Lendaro et al.,    | 2018 | BMJ Open. 2018; 8(7)                                                               | non pertinent |
| 782 | Leleu et al.,      | 2018 | American j of hematology. 2018; 93(8):985-993                                      | non pertinent |
| 783 | Lejeune et al.,    | 2018 | Neurorehabilitation and neural repair. 2018; 32(4-5):331                           | non pertinent |
| 784 | Lee et al.,        | 2018 | J of laproendoscopic & advanced surgical techniques. Part a. 2018; 28(9):1061-1067 | non pertinent |
| 785 | Lee et al.,        | 2018 | Sci Rep. 2018; 8(1):12971                                                          | non pertinent |
| 786 | Lee et al.,        | 2018 | World neurosurgery. 2018; 109:e194-e202                                            | non pertinent |
| 787 | Lee et al.,        | 2018 | J of clinical oncology. 2018; 36(18):1853-1860                                     | non pertinent |
| 788 | Lee                | 2018 | J of thoracic oncology. 2018; 13(10):194-195                                       | non pertinent |
| 789 | Laue et al.,       | 2018 | Beneficial microbes. 2018; 9(1):35-50                                              | non pertinent |
| 790 | Lattermann et al., | 2018 | Biomed research international. 2018                                                | non pertinent |



|     |                     |      |                                                                        |               |
|-----|---------------------|------|------------------------------------------------------------------------|---------------|
| 791 | Larino-Noia et al., | 2018 | Pancreatology.<br>2018; 18(3):280-285                                  | non pertinent |
| 792 | Lannin et al.,      | 2018 | Int J Stroke. 2018;<br>13(6):648-653                                   | non pertinent |
| 793 | Lagueux et al.,     | 2018 | Clin J Pain. 2018;<br>34(2):145-154                                    | non pertinent |
| 794 | Ladouceur et al.,   | 2018 | Neuroscience.<br>2018; 387:201-213                                     | non pertinent |
| 795 | Ladenstein et al.,  | 2018 | Lancet oncology.<br>2018; 19(12):1617-1629                             | non pertinent |
| 796 | Lacy et al.,        | 2018 | American j of<br>gastroenterology.<br>2018; 113(2):216-224             | non pertinent |
| 797 | Labuschagne et al., | 2018 | Prog<br>Neuropsychophar<br>macol Biol<br>Psychiatry. 2018;<br>81:11-16 | non pertinent |
| 798 | Laaksonen et al.,   | 2018 | Br J Anaesth.<br>2018; 121(1):281-290                                  | non pertinent |
| 799 | Kumru et al.,       | 2018 | Brain research<br>bulletin. 2018;<br>140:205-211                       | non pertinent |
| 800 | Kumar et al.,       | 2018 | Osteoarthritis and<br>cartilage. 2018;<br>26:18-19                     | non pertinent |
| 801 | Krylova et al.,     | 2018 | Clinical EEG and<br>neuroscience.<br>2018; 49(6):NP 6-                 | non pertinent |
| 802 | Kreuder et al.,     | 2018 | Human brain<br>mapping. 2018                                           | non pertinent |
| 803 | Krebs et al.,       | 2018 | Jama. 2018;<br>319(9):872-882                                          | non pertinent |
| 804 | Kothari et al.,     | 2018 | J Prosthodont Res.<br>2018; 62(2):268-272                              | non pertinent |
| 805 | KoOdziej et al.,    | 2018 | BMJ Open. 2018;<br>8(5)                                                | non pertinent |
| 806 | Kong et al.,        | 2018 | Neuroimage Clin.<br>2018; 18:325-334                                   | non pertinent |
| 807 | Kon et al.,         | 2018 | American j of<br>sports medicine.<br>2018; 46(1):171-180               | non pertinent |
| 808 | Kloek et al.,       | 2018 | Phys Ther. 2018;<br>98(7):560-570                                      | non pertinent |
| 809 | Kivitz et al.,      | 2018 | J of rheumatology,<br>45(4):456-464                                    | non pertinent |
| 810 | Kissinger et al.,   | 2018 | The lancet.<br>Infectious<br>diseases. 2018;<br>18(11):1251-1259       | non pertinent |
| 811 | Kingsbury et al.,   | 2018 | Arthritis and<br>rheumatology.<br>2018; 70:454-455                     | non pertinent |
| 812 | Kim et al.,         | 2018 | Clinical<br>orthopaedics and<br>related research.<br>2018; 476(1):6-15 | non pertinent |

|     |                               |      |                                                                                                                                                             |               |
|-----|-------------------------------|------|-------------------------------------------------------------------------------------------------------------------------------------------------------------|---------------|
| 813 | Kim et al.,                   | 2018 | Anesthesia and Analgesia. 2018; 127(3):635-641                                                                                                              | non pertinent |
| 814 | Kerckhove et al.,             | 2018 | European j of pain (London, England). 2018; 22(7):1321-1330                                                                                                 | non pertinent |
| 815 | Kct - Cho                     | 2018 | CRIS – clinical research information service. 2018                                                                                                          | non pertinent |
| 816 | Kaufmann et al.,              | 2018 | Lancet (london, england). 2018; 391(10123):860-869                                                                                                          | non pertinent |
| 817 | Kassim et al.,                | 2018 | Saudi j of anaesthesia. 2018; 12(1):95-102                                                                                                                  | non pertinent |
| 818 | Karlapudi et al.,             | 2018 | J of medicinal food. 2018; 21(5):511-520                                                                                                                    | non pertinent |
| 819 | Karkon Varnosfaderani et al., | 2018 | J of integrative medicine. 2018; 16(2):126-131                                                                                                              | non pertinent |
| 820 | Kang et al.,                  | 2018 | Evidence-based complementary and alternative medicine. 2018                                                                                                 | non pertinent |
| 821 | Kandavel et al.,              | 2018 | Human reproduction. Conference: 34th annual meeting of the european society of human reproduction and embryology. ESHRE. Barcelona, spain. 2018; 33 Suppl 1 | non pertinent |
| 822 | Kallionpaa et al.,            | 2018 | Br J Anaesth. 2018; 121(1):270-280                                                                                                                          | non pertinent |
| 823 | Kalimuddin et al.,            | 2018 | Trials. 2018; 19(1)                                                                                                                                         | non pertinent |
| 824 | Kalafatakis et al.,           | 2018 | Proceedings of the National Academy of Sciences of the United States of America. 2018; 115(17):E4091-E4100                                                  | non pertinent |
| 825 | Kahramanoglu Akosy et al.,    | 2018 | Medical principles and practice. 2018; 26(6):523-529                                                                                                        | non pertinent |
| 826 | Kaczocha et al.,              | 2018 | BMC anesthesiology. 2018; 18(1)                                                                                                                             | non pertinent |
| 827 | Jprn – Sato                   | 2018 | UMIN CTR – clinical trial. 2018                                                                                                                             | unpublished   |
| 828 | Jprn – Mizobuchi              | 2018 | UMIN CTR – clinical trial. 2018                                                                                                                             | unpublished   |
| 829 | Jprn – mizobuchi              | 2018 | UMIN CTR – clinical trial. 2018                                                                                                                             | unpublished   |

|     |                                           |      |                                                                      |               |
|-----|-------------------------------------------|------|----------------------------------------------------------------------|---------------|
| 830 | Joseph et al.,                            | 2018 | International j of therapeutic massage & bodywork. 2018; 11(4):16-22 | non pertinent |
| 831 | Jones et al.,                             | 2018 | Osteoporosis international. 2018; 29(1):282-                         | non pertinent |
| 832 | Jin et al.,                               | 2018 | Osteoarthritis and cartilage. 2018; 26(12):1609-1618                 | non pertinent |
| 833 | Jin et al.,                               | 2018 | Clinical and translational science. 2018; 11(1):46-53                | non pertinent |
| 834 | Jiang et al.,                             | 2018 | Restor Neurol Neurosci. 2018; 36(5): 605-620                         | non pertinent |
| 835 | Jia et al.,                               | 2018 | Pain Physician. 2018; 21(5): 469-481                                 | non pertinent |
| 836 | Jensen et al.,                            | 2018 | Int J Clin Exp Hypn. 2018; 66(3):231-264                             | non pertinent |
| 837 | Jprn – Janssen Pharmaceutical K.K., Japan | 2018 | JAPIC Clinical trials information. 2018                              | non pertinent |
| 838 | Jablonski et al.,                         | 2018 | Clinical respiratory j. 2018; 12(1):183-192                          | non pertinent |
| 839 | Isrctn – McLeod                           | 2018 | ISRCTN Registry. 2018                                                | non pertinent |
| 840 | Isrctn – Webley                           | 2018 | ISRCTN Registry. 2018                                                | non pertinent |
| 841 | Isrctn – Thompson                         | 2018 | ISRCTN Registry. 2018                                                | non pertinent |
| 842 | Isrctn – Le Conte                         | 2018 | ISRCTN Registry. 2018                                                | ongoing       |
| 843 | Isrctn – Berglind                         | 2018 | ISRCTN Registry. 2018                                                | non pertinent |
| 844 | Isrctn – Ironside                         | 2018 | ISRCTN Registry. 2018                                                | non pertinent |
| 845 | Ishaque et al.,                           | 2018 | BMC gastroenterology. 2018; 18(1)                                    | non pertinent |
| 846 | Irct20180619040156N – Fallah              | 2018 | IRCT Iran Registry of Clinical Trials. 2018                          | non pertinent |
| 847 | Irct20180427039436N – Fahaarani           | 2018 | IRCT Iran Registry of Clinical Trials. 2018                          | non pertinent |
| 848 | Irct20171223038021N – Tajrishi            | 2018 | IRCT Iran Registry of Clinical Trials. 2018                          | non pertinent |
| 849 | Irct20171219037966N – Mircheraghi         | 2018 | IRCT Iran Registry of Clinical Trials. 2018                          | non pertinent |
| 850 | Irct20171129037676N – Salehinejad         | 2018 | IRCT Iran Registry of Clinical Trials. 2018                          | non pertinent |

|     |                                      |      |                                                                 |               |
|-----|--------------------------------------|------|-----------------------------------------------------------------|---------------|
| 851 | Isrct20150721023<br>277N – Taghizade | 2018 | IRCT Iran<br>Registry of<br>Clinical Trials.<br>2018            | non pertinent |
| 852 | Isrct20141218020<br>364N – Ayaz      | 2018 | IRCT Iran<br>Registry of<br>Clinical Trials.<br>2018            | non pertinent |
| 853 | Insogna et al.,                      | 2018 | J of bone and<br>mineral research.<br>2018; 33(8):1383-<br>1393 | non pertinent |
| 854 | Ikeda et al.,                        | 2018 | Cancer science.<br>2018; 109(1):215-<br>224                     | non pertinent |
| 855 | Ikeda et al.,                        | 2018 | Eur J Pain. 2018;<br>22(6):1170-1179                            | non pertinent |
| 856 | Ibanez et al.,                       | 2018 | European j of<br>pediatrics. 2018;<br>177(12):1851-<br>1858     | non pertinent |
| 857 | Hywzn – Ribeiro                      | 2018 | Registro brasileiro<br>de ensaios<br>clinicos. 2018             | non pertinent |
| 858 | Hyun et al.,                         | 2018 | Medicine<br>(Baltimore). 2018;<br>97(39):e12595                 | non pertinent |
| 859 | Hunter et al.,                       | 2018 | Osteoarthritis and<br>cartilage. 2018;<br>26:270-271            | non pertinent |
| 860 | Hung et al.,                         | 2018 | PLoS One. 2018;<br>13(2):e0192043                               | non pertinent |
| 861 | Huhn et al.,                         | 2018 | Frontiers in<br>Psychiatry. 2018;<br>9(FEB)                     | non pertinent |
| 862 | Huang et al.,                        | 2018 | Trials. 2018; 19(1)                                             | non pertinent |
| 863 | Huang et al.,                        | 2018 | Clinical infectious<br>diseases. 2018;<br>66(8):1222-1229       | non pertinent |
| 864 | Hu et al.,                           | 2018 | BMC Med<br>Imaging. 2018;<br>18(1):26                           | non pertinent |
| 865 | Hsu et al.,                          | 2018 | American j of<br>hematology. 2018;<br>93(12):1493-1500          | non pertinent |
| 866 | Howard et al.,                       | 2018 | Trials. 2018;<br>19(1):55                                       | non pertinent |
| 867 | Hong et al.,                         | 2018 | International<br>orthopaedics.<br>2018                          | non pertinent |
| 868 | Hoffman et al.,                      | 2018 | Steroids. 2018;<br>134:43-52                                    | non pertinent |
| 869 | Hinsberg et al.,                     | 2018 | Coronary artery<br>disease. 2018;<br>29(3):230-236              | non pertinent |
| 870 | Hetland et al.,                      | 2018 | Critical care<br>nurse. 2018;<br>38(1):17-23                    | non pertinent |
| 871 | Heo et al.,                          | 2018 | BMJ Open. 2018;<br>8(5)                                         | non pertinent |
| 872 | Henssen et al.,                      | 2018 | PLoS One. 2018;<br>13(1):e0191774                               | non pertinent |
| 873 | Haugstad et al.,                     | 2018 | Scandinavian j of<br>pain. 2018;<br>2(3):124-129                | non pertinent |

|     |                          |      |                                                                        |               |
|-----|--------------------------|------|------------------------------------------------------------------------|---------------|
| 874 | Hartley et al.,          | 2018 | Lancet. 2018;<br>392(10164):2595-<br>2605                              | non pertinent |
| 875 | Harrison et al.,         | 2018 | Lancet. 2018;<br>391(10126):1173-<br>1185                              | non pertinent |
| 876 | Harper et al.,           | 2018 | BMJ Open. 2018;<br>8(10):e023769                                       | non pertinent |
| 877 | Harding et al.,          | 2018 | Clin Oncol (R Coll<br>Radiol). 2018;<br>30(4):233-242                  | non pertinent |
| 878 | Harada-Shiba et<br>al.,  | 2018 | J of<br>artherosclerosis<br>and thrombosis.<br>2018; 25(5):422-<br>429 | non pertinent |
| 879 | Hansen et al.,           | 2018 | CNS Neurosci<br>Ther. 2018;<br>24(9):820-827                           | non pertinent |
| 880 | Hansen et al.,           | 2018 | PLoS One. 2018;<br>13(8):e0201642                                      | non pertinent |
| 881 | Hansen et al.,           | 2018 | Regional<br>anesthesia and<br>pain medicine.<br>2018; 43(7):e54-       | non pertinent |
| 882 | Hammoud et al.,          | 2018 | Biological<br>psychiatry. 2018;<br>83(9):348-                          | non pertinent |
| 883 | Haller et al.,           | 2018 | Trials. 2018; 19(1)                                                    | non pertinent |
| 884 | Hafner et al.,           | 2018 | J of neuromuscular<br>diseases. 2018;<br>5:116-                        | non pertinent |
| 885 | Haddad et al.,           | 2018 | PLoS One. 2018;<br>13(4):e0195287                                      | non pertinent |
| 886 | Gupta et al.,            | 2018 | Lung India. 2018;<br>35(1):9-15                                        | non pertinent |
| 887 | Guilkey et al.,          | 2018 | J of telemedicine<br>and telecare.<br>2018; 24(1):44-50                | non pertinent |
| 888 | Gudin et al.,            | 2018 | Postgrad Med.<br>2018; 130(1):42-<br>51                                | non pertinent |
| 889 | Gude et al.,             | 2018 | Implementation<br>science. 2018;<br>13(1):33                           | non pertinent |
| 890 | Gu et al.,               | 2018 | Expert review of<br>vaccines. 2018;<br>17(3):257-262                   | non pertinent |
| 891 | Grent-´t-Jong et<br>al., | 2018 | Brain. 2018;<br>141(8):2511-2526                                       | non pertinent |
| 892 | Grahl et al.,            | 2018 | Elife. 2018; 7                                                         | non pertinent |
| 893 | Goulet et al.,           | 2018 | Contemporary<br>clinical trials.<br>2018; 65:1-7                       | non pertinent |
| 894 | Gordon et al.,           | 2018 | JAMA Psychiatry.<br>2018; 75(2):149-<br>157                            | non pertinent |
| 895 | Gollub et al.,           | 2018 | J of Pain. 2018;<br>19(5):515-527                                      | non pertinent |
| 896 | Goldway et al.,          | 2018 | Biological<br>psychiatry. 2018;<br>83(9):447-                          | non pertinent |

|     |                      |      |                                                                                   |               |
|-----|----------------------|------|-----------------------------------------------------------------------------------|---------------|
| 897 | Gold et al.,         | 2018 | J of drugs in dermatology. 2018; 17(1):66-73                                      | non pertinent |
| 898 | Goebel et al.,       | 2018 | Scandinavian j of pain. 2018; 18(1):29-37                                         | non pertinent |
| 899 | Glatt et al.,        | 2018 | Annals of the rheumatic diseases. 2018; 77(4):523-532                             | non pertinent |
| 900 | Gianluca et al.,     | 2018 | Research in psychotherapy: psychopathology, process and outcome. 2018; 21:43-44   | non pertinent |
| 901 | Ghasemi et al.,      | 2018 | Anti-inflammatory & anti-allergy agents in medicinal chemistry. 2018; 17(1):57-67 | non pertinent |
| 902 | Gartner et al.,      | 2018 | Multiple sclerosis j – experimental, translational and clinical. 2018; 4(2)       | non pertinent |
| 903 | Garcia-Villa et al., | 2018 | Thrombosis research. 2018; 164:202-203                                            | non pertinent |
| 904 | Gao et al.,          | 2018 | Trials. 2018; 19(1)                                                               | non pertinent |
| 905 | Ganda et al.,        | 2018 | Diabetes, obesity & metabolism. 2018; 20(10):2389-2398                            | non pertinent |
| 906 | Fox et al.,          | 2018 | N Engl J Med. 2018; 379(9):846-855                                                | non pertinent |
| 907 | Fox et al.,          | 2018 | Neurology. 2018; 90(15)                                                           | non pertinent |
| 908 | Fox et al.,          | 2018 | Gut. 2018; 67:A208-                                                               | non pertinent |
| 909 | Fortin et al.,       | 2018 | Musculoskelet Sci Pract. 2018; 38:1-7                                             | non pertinent |
| 910 | Fitzgibbon et al.,   | 2018 | European j of pain (London, England). 2018; 22(7):1255-1267                       | non pertinent |
| 911 | Fiori et al.,        | 2018 | Clin Exp Rheumatol 36 Suppl. 2018; 113(4):135-141                                 | non pertinent |
| 912 | Finn et al.,         | 2018 | Alcohol and alcoholism. 2018; 53(4):376-385                                       | non pertinent |
| 913 | Fh5r - Freitas       | 2018 | Registro brasileiro de ensaios clinicos. 2018                                     | non pertinent |
| 914 | Fenster et al.,      | 2018 | Pediatric emergency care. 2018; 34(9):607-612                                     | non pertinent |

|     |                                       |      |                                                                    |               |
|-----|---------------------------------------|------|--------------------------------------------------------------------|---------------|
| 915 | Fc62c – Oliveira-Souza                | 2018 | Registro brasileiro de ensaios clinicos. 2018                      | non pertinent |
| 916 | Fattahi et al.,                       | 2018 | International immunopharmacology. 2018; 54:112-117                 | non pertinent |
| 917 | Farrokhi et al.,                      | 2018 | Pain Physician. 2018; 21(4):383-406                                | non pertinent |
| 918 | Euctr - eudract_number:2018-001060-35 | 2018 | EU clinical trial register. 2018                                   | ongoing       |
| 919 | Euctr - eudract_number:2017-002708-28 | 2018 | EU clinical trial register. 2018                                   | ongoing       |
| 920 | Euctr - eudract_number:2017-003414-10 | 2018 | EU clinical trial register. 2018                                   | ongoing       |
| 921 | Euctr - eudract_number:2017-003497-14 | 2018 | EU clinical trial register. 2018                                   | ongoing       |
| 922 | Euctr - eudract_number:2017-003827-31 | 2018 | EU clinical trial register. 2018                                   | ongoing       |
| 923 | Euctr - eudract_number:2017-003497-14 | 2018 | EU clinical trial register. 2018                                   | ongoing       |
| 924 | Euctr - eudract_number:2017-003414-10 | 2018 | EU clinical trial register. 2018                                   | ongoing       |
| 925 | Euctr - eudract_number:2017-004226-15 | 2018 | EU clinical trial register. 2018                                   | ongoing       |
| 926 | Esfandiarpour et al.,                 | 2018 | Clinical j of sport medicine. 2018; 28(3):e76-e77                  | non pertinent |
| 927 | Erdal et al.,                         | 2018 | Drugs & aging. 2018; 1-14                                          | non pertinent |
| 928 | Eineluoto et al.,                     | 2018 | Eur Urol Oncol. 2018; 1(3):202-207                                 | non pertinent |
| 929 | Egerton et al.,                       | 2018 | Osteoarthritis and cartilage. 2018; 26:269-                        | non pertinent |
| 930 | Edelbol-Carlman et al.,               | 2018 | Scand J Pain. 2018; 18(1):81-91                                    | non pertinent |
| 931 | Dziewas et al.,                       | 2018 | Lancet neurology. 2018; 17(10):849-859                             | non pertinent |
| 932 | Dueñas-Garcia et al.,                 | 2018 | Female pelvic medicine & reconstructive surgery. 2018; 24(2):95-99 | non pertinent |
| 933 | Drks – Kyung-Eun                      | 2018 | DRKS – Deutsches Register Klinischer Studien. 2018                 | non pertinent |
| 934 | Drks – Weber                          | 2018 | DRKS – Deutsches Register Klinischer Studien. 2018                 | non pertinent |

|     |                          |      |                                                               |               |
|-----|--------------------------|------|---------------------------------------------------------------|---------------|
| 935 | Drks – Baumeister        | 2018 | DRKS – Deutsches Register Klinischer Studien. 2018            | non pertinent |
| 936 | Drks – Buchwitz          | 2018 | DRKS – Deutsches Register Klinischer Studien. 2018            | non pertinent |
| 937 | Dreno et al.,            | 2018 | Lancet oncology. 2018; 19(7):916-929                          | non pertinent |
| 938 | Dréno et al.,            | 2018 | British j of cancer. 2018; 118(6):777-784                     | non pertinent |
| 939 | Drake et al.,            | 2018 | BMC neurology. 2018; 18(1)                                    | non pertinent |
| 940 | Donskov et al.,          | 2018 | Acta oncologica. 2018; 57(5):589-594                          | non pertinent |
| 941 | Dong et al.,             | 2018 | Trials. 2018; 19(1):607                                       | non pertinent |
| 942 | Domènech et al.,         | 2018 | J of Crohn's & colitis. 2018; 12(6):687-694                   | non pertinent |
| 943 | Doherty-Restrepo et al., | 2018 | J of allied health. 2018; 47(2):107-112                       | non pertinent |
| 944 | Ditre et al.,            | 2018 | J of abnormal psychology. 2018 May                            | non pertinent |
| 945 | Ditre et al.,            | 2018 | Behaviour research and therapy. 2018                          | non pertinent |
| 946 | Digenio et al.,          | 2018 | Diabetes care. 2018; 41(4):807-814                            | non pertinent |
| 947 | Derakhshani et al.,      | 2018 | J of sport rehabilitation. 2018; 1-30                         | non pertinent |
| 948 | Derakshan et al.,        | 2018 | Anesthesiology and pain medicine. 2018; 8(5)                  | non pertinent |
| 494 | Dennison et al.,         | 2018 | Clinical pharmacology in drug development. 2018; 7(8):860-870 | non pertinent |
| 950 | Deng et al.,             | 2018 | Trials. 2018; 19(1):701                                       | non pertinent |
| 951 | DeLozier et al.,         | 2018 | Gabi j. 2018; 7(2)                                            | non pertinent |
| 952 | Delanian et al.,         | 2018 | Radiotherapy and oncology. 2018; 127                          | non pertinent |
| 953 | Deitos et al.,           | 2018 | Frontiers in human neuroscience. 2018; 12                     | non pertinent |
| 954 | Dehoratius et al.,       | 2018 | Patient. 2018; 11(3):361-369                                  | non pertinent |



|     |                           |      |                                                                  |               |
|-----|---------------------------|------|------------------------------------------------------------------|---------------|
| 955 | Degala et al.,            | 2018 | J of oral and maxillofacial surgery. 2018; 76(9):1847-1858       | non pertinent |
| 956 | DeRuysscher et al.,       | 2018 | J of clinical oncology. 2018; 36(23):2366-2377                   | non pertinent |
| 957 | De Pokomandy et al.,      | 2018 | HIV Med. 2018; 19(2):81-89                                       | non pertinent |
| 958 | De Icco et al.,           | 2018 | J of headache and pain. 2018; 19                                 | non pertinent |
| 959 | De Icco et al.,           | 2018 | Cephalalgia. 2018; 38(10):1658-1664                              | non pertinent |
| 960 | De Hoon et al.,           | 2018 | Clinical pharmacology and therapeutics. 2018; 103(5):815-825     | non pertinent |
| 961 | De Almeida Basano et al., | 2018 | American j of tropical medicine and hygiene. 2018; 98(3):786-790 | non pertinent |
| 962 | De Almeida et al.,        | 2018 | Neuroregulation. 2018; 5(4):150-151                              | non pertinent |
| 963 | Davis et al.,             | 2018 | JAMA pediatrics. 2018; 172(8):741-748                            | non pertinent |
| 964 | Das Nair et al.,          | 2018 | Clinical rehabilitation. 2018; 32(6):777-789                     | non pertinent |
| 965 | Dai et al.,               | 2018 | J Headache Pain. 2018; 19(1):24                                  | non pertinent |
| 966 | Da Silva et al.,          | 2018 | Physiology & behavior. 2018; 194:77-82                           | non pertinent |
| 967 | D'Angelo et al.,          | 2018 | Investigational new drugs. 2018; 36(1):103-113                   | non pertinent |
| 968 | Ctri – Ramchandani        | 2018 | Clinical trial registry India. 2018                              | non pertinent |
| 969 | Ctri – Tripathy           | 2018 | Clinical trial registry India. 2018                              | non pertinent |
| 970 | Ctri – Bedekar            | 2018 | Clinical trial registry India. 2018                              | non pertinent |
| 971 | Cruz-Correa et al.,       | 2018 | Gastroenterology. 2018; 155(3):668-673                           | non pertinent |
| 972 | Cree et al.,              | 2018 | Therapeutic advances in neurological disorders. 2018; 11         | non pertinent |
| 973 | Cornelissen et al.,       | 2018 | Eur J Anaesthesiol. 2018; 35(1):49-59                            | non pertinent |
| 974 | Coric et al.,             | 2018 | J of neurosurgery. Spine. 2018; 28(3):252-261                    | non pertinent |

|     |                      |      |                                                             |               |
|-----|----------------------|------|-------------------------------------------------------------|---------------|
| 975 | Cooper et al.,       | 2018 | Neuropsychopharmacology. 2018; 43(10):2046-2055             | non pertinent |
| 976 | Conaghan et al.,     | 2018 | Osteoarthritis and cartilage. 2018; 26:25-26                | non pertinent |
| 977 | Cometti et al.,      | 2018 | Peerj. 2018; (11)                                           | non pertinent |
| 978 | Coll et al.,         | 2018 | Cytotherapy. 2018; 20(5):33-34<br>Exp Clin                  | non pertinent |
| 979 | Colizzi et al.,      | 2018 | Psychopharmacol. 2018; 26(6):582-598                        | non pertinent |
| 980 | Cohen et al.,        | 2018 | American j of clinical oncology. 2018; 41(3):230-235        | non pertinent |
| 981 | Clayton et al.,      | 2018 | J of sexual medicine. 2018; 15(1):43-51                     | non pertinent |
| 982 | Claessens et al.,    | 2018 | Breast cancer research and treatment. 2018; 172(2):413-423  | non pertinent |
| 983 | Chung et al.,        | 2018 | Comput Biol Med. 2018; 101:146-152                          | non pertinent |
| 984 | Christopher et al.,  | 2018 | American j on addictions. 2018; 27(4):290-291               | non pertinent |
| 985 | Christiansen et al., | 2018 | Physical therapy. 2018; 98(7):578-584                       | non pertinent |
| 986 | Chow et al.,         | 2018 | J of clinical oncology. 2018; 36(19):1913-1921              | non pertinent |
| 987 | Choi et al.,         | 2018 | Neurosurgery. 2018; 82(3):289-297                           | non pertinent |
| 988 | Choi et al.,         | 2018 | Coronary artery disease. 2018; 29(2):104-113                | non pertinent |
| 989 | Choi et al.,         | 2018 | Lasers in surgery and medicine. 2018                        | non pertinent |
| 990 | Choi et al.,         | 2018 | Paediatric anaesthesia. 2018; 28(8):739-744                 | non pertinent |
| 991 | Cho et al.,          | 2018 | Evidence-based complementary and alternative medicine. 2018 | non pertinent |
| 992 | ChiCtr – Yuan        | 2018 | Chinese clinical trial registry. 2018                       | non pertinent |
| 993 | ChiCtr – Tun         | 2018 | Chinese clinical trial registry. 2018                       | non pertinent |
| 994 | ChiCtr – Zongmei     | 2018 | Chinese clinical trial registry. 2018                       | non pertinent |
| 995 | ChiCtr – Chen        | 2018 | Chinese clinical trial registry. 2018                       | non pertinent |
| 996 | ChiCtr - Li          | 2018 | Chinese clinical trial registry. 2018                       | non pertinent |
| 997 | ChiCtr – Shuo        | 2018 | Chinese clinical trial registry. 2018                       | non pertinent |

|      |                           |      |                                                                                                                                                           |               |
|------|---------------------------|------|-----------------------------------------------------------------------------------------------------------------------------------------------------------|---------------|
| 998  | ChiCtr – Yunliang         | 2018 | Chinese clinical trial registry. 2018                                                                                                                     | non pertinent |
| 999  | ChiCtr – Kexin            | 2018 | Chinese clinical trial registry. 2018                                                                                                                     | non pertinent |
| 1000 | ChiCtr – Jiancai          | 2018 | Chinese clinical trial registry. 2018                                                                                                                     | non pertinent |
| 1001 | ChiCtr – Dan              | 2018 | Chinese clinical trial registry. 2018                                                                                                                     | non pertinent |
| 1002 | ChiCtr - Xiang            | 2018 | Chinese clinical trial registry. 2018                                                                                                                     | non pertinent |
| 1003 | Chi et al.,               | 2018 | Lancet Oncol. 2018; 19(2):194-206                                                                                                                         | non pertinent |
| 1004 | Chen et al.,              | 2018 | Clinical pharmacology in drug development. 2018; 7(8):880-888                                                                                             | non pertinent |
| 1005 | Chary-Valckenaere et al., | 2018 | Int J Biometeorol. 2018; 62(6):1003-1014                                                                                                                  | non pertinent |
| 1006 | Chang et al.,             | 2018 | Medicine (Baltimore). 2018; 97(25):e11193                                                                                                                 | non pertinent |
| 1007 | Champion et al.,          | 2018 | Annals of cardiac anaesthesia. 2018; 21(1):8-14                                                                                                           | non pertinent |
| 1008 | Cats et al.,              | 2018 | The lancet. Oncology. 2018; 19(5):616-628                                                                                                                 | non pertinent |
| 1009 | Carrizosa-Moog et al.,    | 2018 | Canadian j of neurological sciences. 2018; 45(6):624-632                                                                                                  | non pertinent |
| 1010 | Carmichael et al.,        | 2018 | J of nutrition, health & aging. 2018; 22(7):837-846                                                                                                       | non pertinent |
| 1011 | Carek et al.,             | 2018 | Clinical j of sport medicine. Conference: 27th annual meeting of american medical society for sports medicine. AMSSM 2018. United states. 2018; 28(2):e19 | non pertinent |
| 1012 | Cai et al.,               | 2018 | Annals of the rheumatic diseases. 2018; 77:788-                                                                                                           | non pertinent |
| 1013 | C4jxp – Engel             | 2018 | Registro brasileiro de ensaios clinicos. 2018                                                                                                             | non pertinent |
| 1014 | Bumbea et al.,            | 2018 | Pain practice. Conference: 9th World Congress of the World Institute of Pain, WIP 2018 Ireland; 18:98                                                     | non pertinent |

|      |                          |      |                                                                   |               |
|------|--------------------------|------|-------------------------------------------------------------------|---------------|
| 1015 | Bruno et al.,            | 2018 | Arguivos de neuro-psiquiatria. 2018; 76(4):213-218                | non pertinent |
| 1016 | Brochado et al.,         | 2018 | Braz Oral Res. 2018; 32:e50                                       | non pertinent |
| 1017 | Brewer et al.,           | 2018 | Fatigue: biomedicine, health and behavior. 2018; 6(3):132-140     | non pertinent |
| 1018 | Brannon et al.,          | 2018 | Psychol Health. 2018; 33(6):701-712                               | non pertinent |
| 1019 | Borthwick et al.,        | 2018 | PLoS One. 2018; 13(5)                                             | non pertinent |
| 1020 | Boonhong et al.,         | 2018 | J of back and musculoskeletal rehabilitation. 2018; 31(3):507-513 | non pertinent |
| 1021 | Boomershine et al.,      | 2018 | Rheumatology and therapy. 2018; 5(1):271-281                      | non pertinent |
| 1022 | Boocock et al.,          | 2018 | Occupational and environmental medicine. 2018; 75:A268-           | non pertinent |
| 1023 | Boire et al.,            | 2018 | J of rheumatology. 2018; 45(7):1027-1028                          | non pertinent |
| 1024 | Blumberger et al.,       | 2018 | Lancet. 2018; 391(10131):1683-1692                                | non pertinent |
| 1025 | Blom et al.,             | 2018 | J of clinical lipidology. 2018; 12(5):1234-1243.e1235             | non pertinent |
| 1026 | Bjelovic et al.,         | 2018 | J Gastrointest Surg. 2018; 22(11):1939-1949                       | non pertinent |
| 1027 | Biswas et al.,           | 2018 | Regional anesthesia and pain medicine. 2018; 43(2):154-160        | non pertinent |
| 1028 | Bischoff-Ferrari et al., | 2018 | RMD open. 2018; 4(2)                                              | non pertinent |
| 1029 | Birbara et al.,          | 2018 | J of pain research. 2018; 11:151-164                              | non pertinent |
| 1030 | Bergmann et al.,         | 2018 | Epilepsy Behav. 2018; 84:173-178                                  | non pertinent |
| 1031 | Benitez-Camps et al.,    | 2018 | J of hypertension. 2018; 36(8):1656-1662                          | non pertinent |
| 1032 | Benatar et al.,          | 2018 | Neurology. 2018; 90(7):e565-e574                                  | non pertinent |
| 1033 | Bembich et al.,          | 2018 | Pediatrics. 2018; 142(3)                                          | non pertinent |
| 1034 | Bekele et al.,           | 2018 | J of internal medicine. 2018; 284(3):292-306                      | non pertinent |

|      |                           |      |                                                                        |               |
|------|---------------------------|------|------------------------------------------------------------------------|---------------|
| 1035 | Beissner et al.,          | 2018 | Biol Psychiatry. 2018; 84(10):734-742                                  | non pertinent |
| 1036 | Bayart et al.,            | 2018 | Pediatric dermatology. 2018; 35(5):719-                                | non pertinent |
| 1037 | Barut et al.,             | 2018 | Turkish j of medical sciences. 2018; 48(4):716-723                     | non pertinent |
| 1038 | Banerjee et al.,          | 2018 | Annals of oncology. 2018; 29(4):917-923                                | non pertinent |
| 1039 | Balanyuk et al.,          | 2018 | Acta Biomed. 2018; 89(4-s):55-63                                       | non pertinent |
| 1040 | Back et al.,              | 2018 | Mol Psychiatry. 2018; 23(7):1584-1589                                  | non pertinent |
| 1041 | Auvichayapat et al.,      | 2018 | J of pain research. 2018; 11:2301-2309                                 | non pertinent |
| 1042 | Atthakomol et al.,        | 2018 | BMC musculoskeletal disorders. 2018; 19(1)                             | non pertinent |
| 1043 | Atallah et al.,           | 2018 | J of endourology/Endourological Society. 2018; 32:A241-                | non pertinent |
| 1044 | Ascierto et al.,          | 2018 | Lancet oncology. 2018; 19(4):510-520                                   | non pertinent |
| 1045 | Asari et al.,             | 2018 | Psychopharmacology (Berl). 2018; 235(9):2631-2642                      | non pertinent |
| 1046 | Artusi et al.,            | 2018 | Movement disorders. 2018; 33:95-                                       | non pertinent |
| 1047 | Armstrong-Hough et al.,   | 2018 | J Acquir Immune Defic Syndr. 2018; 77(4):400-404                       | non pertinent |
| 1048 | Armio et al.,             | 2018 | Schizophrenia bulletin. 2018; 44:391-                                  | non pertinent |
| 1049 | Arenberger et al.,        | 2018 | Current therapeutic research – clinical and experimental. 2018; 88:1-7 | non pertinent |
| 1050 | Arbillaga-Etxarri et al., | 2018 | The european respiratory j. 2018; 52(4)                                | non pertinent |
| 1051 | Arabi et al.,             | 2018 | Trials. 2018; 19(1)                                                    | non pertinent |
| 1052 | Anstensrud et al.,        | 2018 | European j of heart failure. 2018; 20:125-                             | non pertinent |
| 1053 | Ansermino et al.,         | 2018 | Anesthesia and Analgesia. 2018; 127(1):23-24                           | non pertinent |

|      |                    |      |                                                                                                                           |                    |
|------|--------------------|------|---------------------------------------------------------------------------------------------------------------------------|--------------------|
| 1054 | Angius et al.,     | 2018 | Brain Stimuli. 2018; 11(1):108-117                                                                                        | non pertinent      |
| 1055 | Andruchow et al.,  | 2018 | Canadian j of emergency medicine. 2018; 20:32-33                                                                          | non pertinent      |
| 1056 | Andersson et al.,  | 2018 | Scandinavian j of rheumatology. 2018; 47:28-                                                                              | non pertinent      |
| 1057 | Amraoui et al.,    | 2018 | JAMA network open. 2018; 1(4):e181164                                                                                     | no oral conditions |
| 1058 | Altiparmak et al., | 2018 | Saudi medical j. 2018; 39(6):579-585                                                                                      | non pertinent      |
| 1059 | Alphs et al.,      | 2018 | Early intervention in psychiatry. 2018; 12(1):55-65                                                                       | non pertinent      |
| 1060 | Allen et al.,      | 2018 | Annals of thoracic surgery. 2018; 105(5):1344-1350                                                                        | non pertinent      |
| 1061 | Akeju et al.,      | 2018 | Clin Neurophysiol. 2018; 129(1):69-78                                                                                     | non pertinent      |
| 1062 | Aitken et al.,     | 2018 | Osteoarthritis Cartilage. 2018; 26(7):880-887                                                                             | non pertinent      |
| 1063 | Aitken et al.,     | 2018 | BMC Musculoskelet Disord. 2018; 19(1):217                                                                                 | non pertinent      |
| 1064 | Aidelbaum et al.,  | 2018 | J of psychopharmacology (Oxford, England). 2018; 32(5):541-551                                                            | non pertinent      |
| 1065 | Ahrari et al.,     | 2018 | Biological psychiatry. 2018; 83(9):199-200                                                                                | non pertinent      |
| 1066 | Ahn et al.,        | 2018 | J of Pain. 2018                                                                                                           | non pertinent      |
| 1067 | Ahmed et al.,      | 2018 | BMC Neurol. 2018; 18(1):191                                                                                               | non pertinent      |
| 1068 | Ahlander et al.,   | 2018 | J Clin Nurs. 2018; 27(5-6):1250-1261                                                                                      | non pertinent      |
| 1069 | Agrawal et al.,    | 2018 | Indian heart j. Conference: 70th annual conference of cardiological society of india. India. 2018; 70(Supplement 2):41-42 | non pertinent      |
| 1070 | Adler et al.,      | 2018 | J of integrative medicine. 2018; 16(3):178-184                                                                            | non pertinent      |
| 1071 | Adams et al.,      | 2018 | Int J Nurs Stud. 2018; 77:106-114                                                                                         | non pertinent      |

|      |                     |      |                                                                     |               |
|------|---------------------|------|---------------------------------------------------------------------|---------------|
| 1072 | Actrn – Manning     | 2018 | Australian New Zealand Clinical Trials Registry. 2018               | non pertinent |
| 1073 | Actrn – Meyrick     | 2018 | Australian New Zealand Clinical Trials Registry. 2018               | non pertinent |
| 1074 | Actrn – Scott       | 2018 | Australian New Zealand Clinical Trials Registry. 2018               | non pertinent |
| 1075 | Actrn – Sun         | 2018 | Australian New Zealand Clinical Trials Registry. 2018               | non pertinent |
| 1076 | Actrn – Stanton     | 2018 | Australian New Zealand Clinical Trials Registry. 2018               | non pertinent |
| 1077 | Actrn – Sherrington | 2018 | Australian New Zealand Clinical Trials Registry. 2018               | non pertinent |
| 1078 | Actrn – Jones       | 2018 | Australian New Zealand Clinical Trials Registry. 2018               | non pertinent |
| 1079 | Actrn – Macdessi    | 2018 | Australian New Zealand Clinical Trials Registry. 2018               | non pertinent |
| 1080 | Actrn – Cao         | 2018 | Australian New Zealand Clinical Trials Registry. 2018               | non pertinent |
| 1081 | Actrn – Goodchild   | 2018 | Australian New Zealand Clinical Trials Registry. 2018               | non pertinent |
| 1082 | Actrn – Hides       | 2018 | Australian New Zealand Clinical Trials Registry. 2018               | non pertinent |
| 1083 | Actrn – Short       | 2018 | Australian New Zealand Clinical Trials Registry. 2018               | non pertinent |
| 1084 | Actrn – Harris      | 2018 | Australian New Zealand Clinical Trials Registry. 2018               | non pertinent |
| 1085 | Actrn – De Andrade  | 2018 | Australian New Zealand Clinical Trials Registry. 2018               | non pertinent |
| 1086 | Actrn – Kirby       | 2018 | Australian New Zealand Clinical Trials Registry. 2018               | non pertinent |
| 1087 | Nakamura et al,     | 2018 | Clinical orthopaedics and related research. 2018; 476(11):2169-2173 | non pertinent |

|      |                     |      |                                                                                                                                                                                  |               |
|------|---------------------|------|----------------------------------------------------------------------------------------------------------------------------------------------------------------------------------|---------------|
| 1088 | Geusens et al.,     | 2018 | Osteologie. 2018; 27(1):A18-                                                                                                                                                     | non pertinent |
| 1089 | Dittert et al.,     | 2018 | Frontiers in behavioral neuroscience. 2018; 12                                                                                                                                   | non pertinent |
| 1090 | Peng et al.,        | 2018 | Frontiers in human neuroscience. 2018; 12                                                                                                                                        | non pertinent |
| 1091 | Barron et al.,      | 2018 | Biological psychiatry. Conference: 73rd Annual Scientific Convention and Meeting of the Society of Biological Psychiatry, SOBP 2018. United States. 2018; 83(9 Supplement 1):403 | non pertinent |
| 1092 | Grimm et al.,       | 2018 | European neuropsychopharmacology                                                                                                                                                 | non pertinent |
| 1093 | Cuatrecasas et al., | 2018 | Endocrine connections. 2018; 7(10):1031-1039                                                                                                                                     | non pertinent |
| 1094 | Ahmed et al.,       | 2018 | BMC neurology. 2018; 18(1)                                                                                                                                                       | non pertinent |
| 1095 | Van Selm et al.,    | 2018 | European journal of pain (United Kingdom). 2018; 22(8):1448-1456                                                                                                                 | non pertinent |
| 1096 | Naegel et al.,      | 2018 | Neurology Conference: 70th Annual Meeting of the American Academy of Neurology, AAN 2018. United States; 90(15 Supplement 1)                                                     | non pertinent |
| 1097 | Fairchild           | 2018 | J of the American Academy of Child and Adolescent Psychiatry. 2018; 57(12):911-913                                                                                               | non pertinent |
| 1098 | Kong et al.,        | 2018 | Neuroimage: clinical. 2018; 18(325-334)                                                                                                                                          | non pertinent |
| 1099 | Liao et al.,        | 2018 | Neuroscience letters. 2018; 674(54-59)                                                                                                                                           | non pertinent |
| 1100 | ?                   | 2018 | Brain stimulation. 2018; 11(6):A1-A12                                                                                                                                            | non pertinent |
| 1101 | Zwaans et al.,      | 2017 | Trials. 2017; 18(1)                                                                                                                                                              | non pertinent |
| 1102 | Zinkus et al.,      | 2017 | Medical science monitor. 2017; 23:3019-3025                                                                                                                                      | non pertinent |



|      |                   |      |                                                                                                                                                                   |               |
|------|-------------------|------|-------------------------------------------------------------------------------------------------------------------------------------------------------------------|---------------|
| 1103 | Zinke et al.,     | 2017 | PLoS One. 2017; 12(10)                                                                                                                                            | non pertinent |
| 1104 | Zhu et al.,       | 2017 | Trials. 2017; 18(1)                                                                                                                                               | non pertinent |
| 1105 | Zhu et al.,       | 2017 | J of digestive diseases. 2017; 18(8):453-460                                                                                                                      | non pertinent |
| 1106 | Zhu et al.,       | 2017 | Clinical pharmacology in drug development. 2017; 6(6):604-613                                                                                                     | non pertinent |
| 1107 | Zhou et al.,      | 2017 | J of endourology / Endourological Society. 2017; 31(3):278-282                                                                                                    | non pertinent |
| 1108 | Zhou et al.,      | 2017 | International j of surgery (London, England). 2017; 37 Suppl 1:539-545                                                                                            | non pertinent |
| 1109 | Zheng et al.,     | 2017 | Zhongguo zhen jiu (Chinese acupuncture & moxibustionj). 2017; 37(8):869-873                                                                                       | non pertinent |
| 1110 | Zheng et al.,     | 2017 | Osteoarthritis and cartilage. Conference: 2017 osteoarthritis research society international. OARIS world congress. United states. 2017; 25(Supplement 1):180-181 | non pertinent |
| 1111 | Zheng et al.,     | 2017 | American j of medicine. 2017; 130(10):1211-1218                                                                                                                   | non pertinent |
| 1112 | Zhao et al.,      | 2017 | J of neurosurgical anaesthesiology. 2017; 29(2):132-139                                                                                                           | non pertinent |
| 1113 | Zhang et al.,     | 2017 | The lancet. Oncology. 2017; 18(3):371-383                                                                                                                         | non pertinent |
| 1114 | Zhang et al.,     | 2017 | Clinical j of pain. 2017; 33(5):435-442                                                                                                                           | non pertinent |
| 1115 | Zhang et al.,     | 2017 | J of neurology. 2017; 264(4):654-663                                                                                                                              | non pertinent |
| 1116 | Zhang et al.,     | 2017 | Medicine (united states). 2017; 96(32)                                                                                                                            | non pertinent |
| 1117 | Zesiewicz et al., | 2017 | Neurodegenerativ e disease management. 2017; 7(1):49-59                                                                                                           | non pertinent |

|      |                       |      |                                                               |               |
|------|-----------------------|------|---------------------------------------------------------------|---------------|
| 1118 | Zerbini et al.,       | 2017 | Brazilian j of infectious diseases. 2017; 21(1):63-70         | non pertinent |
| 1119 | Zeller et al.,        | 2017 | Circulation cardiovascular interventions. 2017; 10(9)         | non pertinent |
| 1120 | Zelenetz et al.,      | 2017 | The lancet. Oncology. 2017; 18(3):297-311                     | non pertinent |
| 1121 | Zarski et al.,        | 2017 | J of sexual medicine. 2017; 14(2):238-254                     | non pertinent |
| 1122 | Zarei et al.,         | 2017 | Pain medicine (united states). 2017; 18(1)                    | non pertinent |
| 1123 | Zakrzewska et al.,    | 2017 | Lancet neurol. 2017; 16(4):291-300                            | non pertinent |
| 1124 | Yue et al.,           | 2017 | Open access j of clinical trials. 2017; 9:41-57               | non pertinent |
| 1125 | Young et al.,         | 2017 | BMJ Open. 2017; 7(7):e017190                                  | non pertinent |
| 1126 | Young et al.,         | 2017 | Biol Res Nurs. 2017; 19(3):318-328                            | non pertinent |
| 1127 | Yoshino et al.,       | 2017 | Cancer chemotherapy and pharmacology. 2017; 79(1):107-116     | non pertinent |
| 1128 | Yin et al.,           | 2017 | BMJ Open. 2017; 7(9):e014881                                  | non pertinent |
| 1129 | Yilmazer et al.,      | 2017 | Ear, nose & throat j. 2017; 96(7):250-256                     | non pertinent |
| 1130 | Yearwood et al.,      | 2017 | Neuromodulation. 2017; 20(2):e61-                             | non pertinent |
| 1131 | Yazbeck-Karam et al., | 2017 | Anesthesia and Analgesia. 2017; 124(2):438-444                | non pertinent |
| 1132 | Yang et al.,          | 2017 | Neuroimage. 2017                                              | non pertinent |
| 1133 | Yang et al.,          | 2017 | J of orthopaedic translation. 2017                            | non pertinent |
| 1134 | Yadav et al.,         | 2017 | Saudi j of anaesthesia. 2017; 11(2):158-162                   | non pertinent |
| 1135 | Xue et al.,           | 2017 | Health and quality of life outcomes. 2017; 15(1)              | non pertinent |
| 1136 | Xu et al.,            | 2017 | Archives of gynecology and obstetrics. 2017; 295(5):1167-1174 | non pertinent |
| 1137 | Xu et al.,            | 2017 | Medicine. 2017; 96(27):e7477                                  | non pertinent |
| 1138 | Xie et al.,           | 2017 | Medical science monitor. 2017; 23:704-711                     | non pertinent |

|      |                         |      |                                                                   |               |
|------|-------------------------|------|-------------------------------------------------------------------|---------------|
| 1139 | Wu et al.,              | 2017 | Diabetes research and clinical practice. 2017; 127:35-43          | non pertinent |
| 1140 | Wolf et al.,            | 2017 | Gastroenterology. 2017; 153(2):410-419.e417                       | non pertinent |
| 1141 | Wirth et al.,           | 2017 | Osteoarthritis Cartilage. 2017; 25(8):1313-1323                   | non pertinent |
| 1142 | Williams et al.,        | 2017 | Heart (British Cardiac Society). 2017; 103:A6-A7                  | non pertinent |
| 1143 | Wilcox et al.,          | 2017 | New England j of medicine. 2017; 376(4):305-317                   | non pertinent |
| 1144 | Wigal et al.,           | 2017 | J of child and adolescent psychopharmacology. 2017; 27(8):690-699 | non pertinent |
| 1145 | Widge et al.,           | 2017 | Experimental neurology Part 4. 2017; 287:461-472                  | non pertinent |
| 1146 | Wibawa et al.,          | 2017 | European heart j. 2017; 19:E45-                                   | non pertinent |
| 1147 | Werumeus Buning et al., | 2017 | PLoS One. 2017; 12(7)                                             | non pertinent |
| 1148 | Weiter et al.,          | 2017 | The lancet. Neurology. 2017; 16(8):610-619                        | non pertinent |
| 1149 | Weisstanner et al.,     | 2017 | Swiss Med Wkly. 2017; 147:w14454                                  | non pertinent |
| 1150 | Weiner et al.,          | 2017 | Applied ergonomics. 2017; 60:22-29                                | non pertinent |
| 1151 | Weil et al.,            | 2017 | Health and quality of life outcomes. 2017; 15(1)                  | non pertinent |
| 1152 | Weber et al.,           | 2017 | New England j of medicine. 2017; 377(19):1824-1835                | non pertinent |
| 1153 | Wassif et al.,          | 2017 | Genetics in medicine. 2017; 19(3):297-305                         | non pertinent |
| 1154 | Wang et al.,            | 2017 | Arthritis research & therapy. 2017; 19(1)                         | non pertinent |
| 1155 | Wang et al.,            | 2017 | Biomed research international. 2017; 2017:6875968                 | non pertinent |
| 1156 | Wang et al.,            | 2017 | Oncotarget. 2017; 8(34):57505-57515                               | non pertinent |
| 1157 | Wang et al.,            | 2017 | International j of surgery (London, England); 41:44-49            | non pertinent |
| 1158 | Wang et al.,            | 2017 | Neurological research. 2017; 39(1):36-44                          | non pertinent |

|      |                           |      |                                                                                                                                                   |               |
|------|---------------------------|------|---------------------------------------------------------------------------------------------------------------------------------------------------|---------------|
| 1159 | Wang et al.,              | 2017 | J of international medical research. 2017; 45(2):533-539                                                                                          | non pertinent |
| 1160 | Wang et al.,              | 2017 | BMC urology. 2017; 17(1):2                                                                                                                        | non pertinent |
| 1161 | Wang et al.,              | 2017 | Clinical j of Pain. 2017; 33(2):99-108                                                                                                            | non pertinent |
| 1162 | Wang et al.,              | 2017 | Medicine. 2017; 96(7):e6119                                                                                                                       | non pertinent |
| 1163 | Wan Zaidi et al.,         | 2017 | J of the neurological sciences. 2017; 381:1119-                                                                                                   | non pertinent |
| 1164 | Wan et al.,               | 2017 | Supportive care in cancer. 2017; 25(2):234-                                                                                                       | non pertinent |
| 1165 | Walter et al.,            | 2017 | J of neural transmission. 2017; 124(10):1277-1278                                                                                                 | non pertinent |
| 1166 | Walter et al.,            | 2017 | European j of clinical pharmacology. 2017; 73(12):1579-1587                                                                                       | non pertinent |
| 1167 | Wallace et al.,           | 2017 | Scandinavian j of pain. 2017; 17:243-251                                                                                                          | non pertinent |
| 1168 | Vodicar et al.,           | 2017 | Clin Spine Surg. 2017; 30(6):E707-e712                                                                                                            | non pertinent |
| 1169 | Vo et al.,                | 2017 | Regional anesthesia and pain medicine. 2017; 42(6)                                                                                                | non pertinent |
| 1170 | Viksveen et al.,          | 2017 | Trials. 2017; 18(1)                                                                                                                               | non pertinent |
| 1171 | Verstovsek et al.,        | 2017 | J of hematology & oncology. 2017; 10(1):1-14                                                                                                      | non pertinent |
| 1172 | Verhees et al.,           | 2017 | Trials. 2017; 18(1):326                                                                                                                           | non pertinent |
| 1173 | Vecchio et al.,           | 2017 | J of headache and pain. 2017; 18(1)                                                                                                               | non pertinent |
| 1174 | Varela-Fascinetto et al., | 2017 | Pediatric transplantation. 2017; 21(1)                                                                                                            | non pertinent |
| 1175 | Van Triest et al.,        | 2017 | J of clinical oncology. Conference: 2017 annual meeting of the american society of clinical oncology, ASCO. United states. 2017; 35(Supplement 1) | non pertinent |
| 1176 | Van Laethem et al.,       | 2017 | Targeted oncology. 2017; 12(1):97-109                                                                                                             | non pertinent |
| 1177 | Van Ginckel et al.,       | 2017 | Phys Ther. 2017; 97(5):537-549                                                                                                                    | non pertinent |

|      |                        |      |                                                                                                                                 |               |
|------|------------------------|------|---------------------------------------------------------------------------------------------------------------------------------|---------------|
| 1178 | Van der Naalt et al.,  | 2017 | Lancet Neurol. 2017; 16(7):532-540                                                                                              | non pertinent |
| 1179 | Van Den Driest et al., | 2017 | BMJ Open. 2017; 7(9)                                                                                                            | non pertinent |
| 1180 | Valentin et al.,       | 2017 | Physiological reports. 2017; 5(5)                                                                                               | non pertinent |
| 1181 | Usichenko et al.,      | 2017 | Brain stimulation. 2017; 10(2):370-371                                                                                          | non pertinent |
| 1182 | Umbricht et al.,       | 2017 | Neuropsychopharmacology. 2017; 42(9):1914-1923                                                                                  | non pertinent |
| 1183 | Uldrick et al.,        | 2017 | Oncologist. 2017; 22(5):505-e549                                                                                                | non pertinent |
| 1184 | Tutticci et al.,       | 2017 | J of gastroenterology and hepatology (australia). 2017; 32:30-                                                                  | non pertinent |
| 1185 | Turner et al.,         | 2017 | Cancer research. Conference: 39th annual CTRC-AACR san antonio breast cancer symposium. United states. 2017; 77(4 Supplement 1) | non pertinent |
| 1186 | Tupper-Carey et al.,   | 2017 | Singapore medical j. 2017; 58(8):481-487                                                                                        | non pertinent |
| 1187 | Tumuluru et al.,       | 2017 | J of child and adolescent psychopharmacology. 2017; 28(8):708-714                                                               | non pertinent |
| 1188 | Tuinmann et al.,       | 2017 | Psycho-oncology. 2017; 26(3):377-384                                                                                            | non pertinent |
| 1189 | Tschugg et al.,        | 2017 | Eur Spine J. 2017; 26(3):857-864                                                                                                | non pertinent |
| 1190 | Tsay et al.,           | 2017 | Antimicrobial agents and chemotherapy. 2017; 61(11)                                                                             | non pertinent |
| 1191 | Trew et al.,           | 2017 | Archives of gynecology and obstetrics. 2017; 295(2):383-395                                                                     | non pertinent |
| 1192 | Treanor et al.,        | 2017 | Vaccine. 2017; 35(6):923-928                                                                                                    | non pertinent |
| 1193 | Treadwell et al.,      | 2017 | J of inborn errors of metabolism and screening. 2017; 5                                                                         | non pertinent |
| 1194 | Tracy et al.,          | 2017 | Psychoneuroendocrinology. 2017; 83:101-110                                                                                      | non pertinent |
| 1195 | Toure et al.,          | 2017 | Clinical infectious diseases. 2017; 65(10):1711-1720                                                                            | non pertinent |

|      |                        |      |                                                                                                                                                    |               |
|------|------------------------|------|----------------------------------------------------------------------------------------------------------------------------------------------------|---------------|
| 1196 | Toprak Celenay et al., | 2017 | Rheumatology international. 2017; 37(11):1799-1806                                                                                                 | non pertinent |
| 1197 | Tombal et al.,         | 2017 | Annals of oncology. 2017; 28:v291-v292                                                                                                             | non pertinent |
| 1198 | Tolcher et al.,        | 2017 | Cancer chemotherapy and pharmacology. 2017; 79(4):673-680                                                                                          | non pertinent |
| 1199 | Thompson et al.,       | 2017 | Antiviral therapy. 2017; 22(3):215-223                                                                                                             | non pertinent |
| 1200 | Thibaut et al.,        | 2017 | Neurosci Lett. 2017; 637:207-214                                                                                                                   | non pertinent |
| 1201 | Thibaut et al.,        | 2017 | Frontiers in neurology. 2017; 8(NOV)                                                                                                               | non pertinent |
| 1202 | Thibaut et al.,        | 2017 | Brain stimulation. 2017; 10(4):e40-                                                                                                                | non pertinent |
| 1203 | Theodoraki et al.,     | 2017 | Regiona anesthesia and pain medicine. 2017; 42(5):e10-e11                                                                                          | non pertinent |
| 1204 | Tesar et al.,          | 2017 | J of the american society of nephrology: JASN. 2017; 28(11):3404-3413                                                                              | non pertinent |
| 1205 | Terzi et al.,          | 2017 | Spine (Phila Pa 1976). 2017; 42(15):1130-1138                                                                                                      | non pertinent |
| 1206 | Teply et al.,          | 2017 | J of clinical oncology. 2017; 35(15)                                                                                                               | non pertinent |
| 1207 | Ten Heggeler et al.,   | 2017 | Best practice and research: clinical gastroenterology. 2017                                                                                        | non pertinent |
| 1208 | Taylor et al.,         | 2017 | Academic emergency medicine. Conference: 2017 annual meeting of the society for academic emergency medicine. SAEM 2017. United states. 2017; 24:62 | non pertinent |
| 1209 | Tap et al.,            | 2017 | The lancet. Oncology. 2017; 18(8):1089-1103                                                                                                        | non pertinent |
| 1210 | Tang et al.,           | 2017 | Sleep. 2017; 40:A137-                                                                                                                              | non pertinent |
| 1211 | Tan et al.,            | 2017 | J of clinical endocrinology and metabolism. 2017; 102(7):2364-2372                                                                                 | non pertinent |

|      |                   |      |                                                                 |               |
|------|-------------------|------|-----------------------------------------------------------------|---------------|
| 1212 | Tan et al.,       | 2017 | PLoS One. 2017; 12(4):e0175625                                  | non pertinent |
| 1213 | Tamm et al.,      | 2017 | Scientific reports. 2017; 7(1):12236-                           | non pertinent |
| 1214 | Tamarelle et al., | 2017 | Trials. 2017; 18(1)                                             | non pertinent |
| 1215 | Tally et al.,     | 2017 | J of orthopaedic research. 2017; 35                             | non pertinent |
| 1216 | Talan et al.,     | 2017 | Annals of emergency medicine. 2017; 70(1):1-11.e19              | non pertinent |
| 1217 | Taddio et al.,    | 2017 | J of Pain. 2017; 18(9):1060-1066                                | non pertinent |
| 1218 | Taddio et al.,    | 2017 | CMAJ: Canadian Medical Association j. 2017; 189(6):E227-E234    | non pertinent |
| 1219 | Szucs et al.,     | 2017 | PLoS One. 2017; 12(2)                                           | non pertinent |
| 1220 | Swisher et al.,   | 2017 | Lancet oncology. 2017; 18(1):75-87                              | non pertinent |
| 1221 | Swider et al.,    | 2017 | PLoS One. 2017; 12(9):e0182616                                  | non pertinent |
| 1222 | Supuran et al.,   | 2017 | Expert opinion on drug discovery. 2017; 12(1):61-88             | non pertinent |
| 1223 | Supan et al.,     | 2017 | American j of topical medicine and hygiene. 2017; 97(2):514-525 | non pertinent |
| 1224 | Sun et al.,       | 2017 | PLoS One. 2017; 12(5)                                           | non pertinent |
| 1225 | Sun et al.,       | 2017 | Cancer chemotherapy and pharmacology. 2017; 79(6):1099-1107     | non pertinent |
| 1226 | Sullivan et al.,  | 2017 | J of Pain. 2017; 18(3):308-318                                  | non pertinent |
| 1227 | Sullivan et al.,  | 2017 | American j of psychiatry. 2017; 174(5):459-467                  | non pertinent |
| 1228 | Su et al.,        | 2017 | Medicine. 2017; 96(7):e5859                                     | non pertinent |
| 1229 | Strand et al.,    | 2017 | RMD open. 2017; 3(1)                                            | non pertinent |
| 1230 | Strand et al.,    | 2017 | Arthritis care & research. 2017; 69(4):592-598                  | non pertinent |
| 1231 | Storheim et al.,  | 2017 | Trials. 2017; 18(1):596                                         | non pertinent |
| 1232 | Storheim et al.,  | 2017 | Musculoskelet Disord. 2017; 18(1):145                           | non pertinent |
| 1233 | Stoltz et al.,    | 2017 | J Pediatr Nurs. 2017; 37:91-96                                  | non pertinent |

|      |                    |      |                                                                        |               |
|------|--------------------|------|------------------------------------------------------------------------|---------------|
| 1234 | Steens et al.,     | 2017 | Antimicrobial agents and chemotherapy. 2017; 61(7)                     | non pertinent |
| 1235 | Steele et al.,     | 2017 | Sleep. 2017; 40:A97-                                                   | non pertinent |
| 1236 | Stamatiou et al.,  | 2017 | J of surgical research. 2017; 213:147-157                              | non pertinent |
| 1237 | Spironelli et al., | 2017 | Frontiers in human neuroscience. 2017; 11                              | non pertinent |
| 1238 | Spigel et al.,     | 2017 | Lung cancer (Amsterdam, Netherlands). 2017; 113:79-84                  | non pertinent |
| 1239 | Spengler et al.,   | 2017 | Biol Psychiatry. 2017; 82(12):885-894                                  | non pertinent |
| 1240 | Sparks et al.,     | 2017 | Manipulative Physiol Ther. 2017; 40(9):625-634                         | non pertinent |
| 1241 | Spahn et al.,      | 2017 | Expert opinion on investigational drugs. 2017; 26(2):155-160           | non pertinent |
| 1242 | Soulieres et al.,  | 2017 | Lancet oncology. 2017; 18(3):323-335                                   | non pertinent |
| 1243 | Sort et al.,       | 2017 | BMJ Open. 2017; 7(5):e016001                                           | non pertinent |
| 1244 | Song et al.,       | 2017 | Vaccine. 2017; 35(2):313-320                                           | non pertinent |
| 1245 | Song et al.,       | 2017 | J Neurosci. 2017; 37(29):6938-6945                                     | non pertinent |
| 1246 | Snidvongs et al.,  | 2017 | Health technology assessment (Winchester, England). 2017; 21(74):1-130 | non pertinent |
| 1247 | Sneller et al.,    | 2017 | Science translational medicine. 2017; 9(419)                           | non pertinent |
| 1248 | Smith et al.,      | 2017 | J of clinical oncology. 2017; 35(15)                                   | non pertinent |
| 1249 | Smith et al.,      | 2017 | Academic emergency medicine. 2017; 24(2):161-167                       | non pertinent |
| 1250 | Small et al.,      | 2017 | British j of pain. 2017; 11(2):68-                                     | non pertinent |
| 1251 | Slee et al.,       | 2017 | Blood. 2017; 130                                                       | non pertinent |
| 1252 | Sistla et al.,     | 2017 | J of surgical research. 2017; 212:94-100                               | non pertinent |
| 1253 | Singla et al.,     | 2017 | J of pain research. 2017; 10:2413-2424                                 | non pertinent |
| 1254 | Singh et al.,      | 2017 | Contraception. 2017; 96(2):118-123                                     | non pertinent |



|      |                  |      |                                                              |               |
|------|------------------|------|--------------------------------------------------------------|---------------|
| 1255 | Singh et al.,    | 2017 | Clinical cancer research. 2017; International j of chronic   | non pertinent |
| 1256 | Singh et al.,    | 2017 | obstructive pulmonary disease. 2017; 12:2001-2014            | non pertinent |
| 1257 | Singer et al.,   | 2017 | Stroke: a j of cerebral circulation. 2017; 48                | non pertinent |
| 1258 | Simson et al.,   | 2017 | Trials. 2017; 18(1):184                                      | non pertinent |
| 1259 | Simpson          | 2017 | Dermatology and therapy. 2017; 7(2):243-248                  | non pertinent |
| 1260 | Simpson et al.,  | 2017 | J of Pain. 2017; 18(1):42-53                                 | non pertinent |
| 1261 | Short et al.,    | 2017 | Sleep. 2017; 40:A434-A435                                    | non pertinent |
| 1262 | Short et al.,    | 2017 | Multiple sclerosis j. 2017; 23(3):729-730                    | non pertinent |
| 1263 | Shirley et al.,  | 2017 | Drugs. 2017; 77(1):107-112                                   | non pertinent |
| 1264 | Shin et al.,     | 2017 | Clinical therapeutics. 2017; 39(2):268-278.e262              | non pertinent |
| 1265 | Shehata et al.,  | 2017 | Helicobacter. 2017; 22(5)                                    | non pertinent |
| 1266 | Shaw et al.,     | 2017 | Brain stimulation. 2017; 10(4):e60-e61                       | non pertinent |
| 1267 | Sharma et al.,   | 2017 | J of the american heart association. 2017; 6(11)             | non pertinent |
| 1268 | Shanahan et al., | 2017 | Nicotine & tobacco research. 2017; 19(8):944-951             | non pertinent |
| 1269 | Sevel et al.,    | 2017 | J of pain. 2017; 18(4):56-                                   | non pertinent |
| 1270 | Seo et al.,      | 2017 | Clinical and experimental vaccine research. 2017; 6(1):38-44 | non pertinent |
| 1271 | Seo et al.,      | 2017 | Anesthesia and analgesia. 2017; 124(5):115-116               | non pertinent |
| 1272 | Seo et al.,      | 2017 | Toxins. 2017; 9(11)                                          | non pertinent |
| 1273 | Seng et al.,     | 2017 | Headache. 2017; 57(4):593-604                                | non pertinent |
| 1274 | Senan            | 2017 | J of thoracic oncology. 2017; 12(1):42-43                    | non pertinent |
| 1275 | Seeger et al.,   | 2017 | J of neural transmission. 2017; 124(10):1321-                | non pertinent |
| 1276 | Seddon et al.,   | 2017 | Lancet oncology. 2017                                        | non pertinent |

|      |                              |      |                                                                                                                                                      |               |
|------|------------------------------|------|------------------------------------------------------------------------------------------------------------------------------------------------------|---------------|
| 1277 | Seckl et al.,                | 2017 | J of clinical oncology. 2017; 35(12):1506-1514                                                                                                       | non pertinent |
| 1278 | Scoville et al.,             | 2017 | Arthritis & rheumatology. 2017; 69                                                                                                                   | non pertinent |
| 1279 | Scott et al.,                | 2017 | Anaesthesia. 2017; 72(4):479-487                                                                                                                     | non pertinent |
| 1280 | Schmalzle et al.,            | 2017 | Proc Natl Acad Sci U S A. 2017; 114(20):5153-5158                                                                                                    | non pertinent |
| 1281 | Schlumberger et al.,         | 2017 | Annals of oncology : official j of the european society for medical oncology. 2017; 28(11):2813-2819                                                 | non pertinent |
| 1282 | Schliessbach et al.,         | 2017 | Scandinavian j of pain. 2017; 17:107-115                                                                                                             | non pertinent |
| 1283 | Schicho et al.,              | 2017 | Medical science monitor. 2017; 23:796-800                                                                                                            | non pertinent |
| 1284 | Scheffer et al.,             | 2017 | Radiology. 2017; 282(2):585-597                                                                                                                      | non pertinent |
| 1285 | Saviola et al.,              | 2017 | Clinical rheumatology. 2017; 1-8                                                                                                                     | non pertinent |
| 1286 | Sasai et al.,                | 2017 | Diabetes, metabolic syndrom and obesity: targets and therapy. 2017; 10:297-309                                                                       | non pertinent |
| 1287 | Sankhala et al.,             | 2017 | J of clinical oncology. Conference: 2017 annual meeting of the american society of clinical oncology, ASCO. United states. 2017; 35(15 Supplement 1) | non pertinent |
| 1288 | Sankarasubramanian et al.,   | 2017 | Brain connect. 2017; 7(3):182-196                                                                                                                    | non pertinent |
| 1289 | Sanfilippo et al.,           | 2017 | Drugs in r and d. 2017; 17(1):167-175                                                                                                                | non pertinent |
| 1290 | Sands et al.,                | 2017 | Gastroenterology. 2017; 153(1):77-86.e76                                                                                                             | non pertinent |
| 1291 | Sander et al.,               | 2017 | BMC Psychiatry. 2017; 17(1):36                                                                                                                       | non pertinent |
| 1292 | Sandahl et al.,              | 2017 | Trials. 2017; 18(1):520                                                                                                                              | non pertinent |
| 1293 | Sánchez et al., Blas et al., | 2017 | International j of neuroscience. 2017; 127(5):404-411                                                                                                | non pertinent |

|      |                      |      |                                                             |               |
|------|----------------------|------|-------------------------------------------------------------|---------------|
| 1294 | Salemis et al.,      | 2017 | Drug discoveries & therapeutics. 2017; 11(1):47-50          | non pertinent |
| 1295 | Salamati et al.,     | 2017 | Iranian j of pharmaceutical research. 2017; 16(1):404-409   | non pertinent |
| 1296 | Saisho et al.,       | 2017 | Antiviral therapy. 2017; 22(4):313-323                      | non pertinent |
| 1297 | Ryu et al.,          | 2017 | International j of medical sciences. 2017; 14(10):994-1001  | non pertinent |
| 1298 | Ryan et al.,         | 2017 | Neuropsychopharmacology. 2017; 42(5):1012-1023              | non pertinent |
| 1299 | Russell et al.,      | 2017 | Arteriosclerosis, thrombosis and vascular biology. 2017; 37 | non pertinent |
| 1300 | Rugo et al.,         | 2017 | Jama. 2017; 317(1):37-47                                    | non pertinent |
| 1301 | Rovati et al.,       | 2017 | Arthritis & rheumatology. 2017; 69                          | non pertinent |
| 1302 | Rouphael et al.,     | 2017 | Lancet (london, england). 2017; 390(10095):649-658          | non pertinent |
| 1303 | Rossi et al.,        | 2017 | Biol Psychol. 2017; 122:21-32                               | non pertinent |
| 1304 | Rosenberg et al.,    | 2017 | FASEB j. 2017; 31(1)                                        | non pertinent |
| 1305 | Rose et al.,         | 2017 | Multiple sclerosis and related disorders. 2017; 17:32-40    | non pertinent |
| 1306 | Ronzio et al.,       | 2017 | European j of physiotherapy. 2017; 19:62-63                 | non pertinent |
| 1307 | Roman-Blas et al.,   | 2017 | Arthritis & rheumatology (hoboken, N.J.). 2017; 69(1):77-85 | non pertinent |
| 1308 | Rodriguez et al.,    | 2017 | American j of emergency medicine. 2017; 35(1):164-170       | non pertinent |
| 1309 | Rockey et al.,       | 2017 | J of investigative medicine. 2017; 65(4):759-764            | non pertinent |
| 1310 | Rittmeyer et al.,    | 2017 | Lancet (london, england). 2017; 389(10066):255-265          | non pertinent |
| 1311 | Ringel-Kulka et al., | 2017 | American j of gastroenterology. 2017; 112(1):145-151        | non pertinent |

|      |                        |      |                                                                                                                                                   |               |
|------|------------------------|------|---------------------------------------------------------------------------------------------------------------------------------------------------|---------------|
|      |                        |      | Cephalalgia.<br>Conference: 18th<br>congress of the<br>international<br>headache society.<br>IHC 2017. Canada.<br>2017;<br>37(Supplement<br>1):54 | non pertinent |
| 1312 | Riks et al.,           | 2017 |                                                                                                                                                   |               |
| 1313 | Riberio et al.,        | 2017 | PLoS One. 2017;<br>12(11):e0187013                                                                                                                | non pertinent |
| 1314 | Riberio et al.,        | 2017 | BMJ Open. 2017;<br>7(1):e015568                                                                                                                   | non pertinent |
| 1315 | Reinhardt et al.,      | 2017 | Circulation. 2017;<br>136                                                                                                                         | non pertinent |
| 1316 | Regules et al.,        | 2017 | New England j of<br>medicine. 2017;<br>376(4):330-341                                                                                             | non pertinent |
| 1317 | Reck et al.,           | 2017 | Lung cancer.<br>(Amsterdam,<br>Netherlands).<br>2017; 112:181-187                                                                                 | non pertinent |
| 1318 | Reavis et al.,         | 2017 | Neuropsychophar<br>macology. 2017;<br>43:586-587                                                                                                  | non pertinent |
| 1319 | Razani et al.,         | 2017 | Phytotherapy<br>research: PTR.<br>2017; 31(11):1731-<br>1738                                                                                      | non pertinent |
| 1320 | Rauck et al.,          | 2017 | Current medical<br>research and<br>opinion. 2017;<br>33(11):1921-1933                                                                             | non pertinent |
| 1321 | Rathod et al.,         | 2017 | International j of<br>radiation oncology<br>biology physics.<br>2017; 99(2):E226-                                                                 | non pertinent |
| 1322 | Rash et al.,           | 2017 | BMJ Open. 2017;<br>7(4):e014909                                                                                                                   | non pertinent |
| 1323 | Ranganathan et<br>al., | 2017 | Peritoneal dialysis<br>international.<br>2017; 37(4):420-<br>428                                                                                  | non pertinent |
| 1324 | Ramo et al.,           | 2017 | BMJ Open. 2017;<br>7(7)                                                                                                                           | non pertinent |
| 1325 | Ramanan et al.,        | 2017 | New England j of<br>medicine. 2017;<br>376(17):1637-<br>1646                                                                                      | non pertinent |
| 1326 | Rafil et al.,          | 2017 | J of Alzheimer's<br>disease. 2017;<br>58(2):401-411                                                                                               | non pertinent |
| 1327 | Raeissadat et al.,     | 2017 | Clinical<br>rheumatology.<br>2017; 36(4):933-<br>940                                                                                              | non pertinent |
| 1328 | Radwan et al.,         | 2017 | BMC Cancer.<br>2017; 17(1):453                                                                                                                    | non pertinent |
| 1329 | Radicioni et al.,      | 2017 | Pediatric<br>neurology. 2017;<br>66:63-68                                                                                                         | non pertinent |

|      |                            |      |                                                                       |               |
|------|----------------------------|------|-----------------------------------------------------------------------|---------------|
| 1330 | Rabinak et al.,            | 2017 | Biological psychiatry. 2017; 81(10):327-                              | non pertinent |
| 1331 | Rabinak et al.,            | 2017 | Neuropsychopharmacology. 2017; 43:339-                                | non pertinent |
| 1332 | Purcell et al.,            | 2017 | International j of lower extremity wounds. 2017; 16(3):163-172        | non pertinent |
| 1333 | Puentedura et al.,         | 2017 | J of manipulative and physiological therapeutics. 2017; 40(8):615-623 | non pertinent |
| 1334 | Pudi et al.,               | 2017 | Respiratory research. 2017; 18(1):182                                 | non pertinent |
| 1335 | Prosenz et al.,            | 2017 | J of clinical neuroscience. 2017; 40:195-197                          | non pertinent |
| 1336 | Prosenz et al.,            | 2017 | Pain. 2017; 158(7):1264-1271                                          | non pertinent |
| 1337 | Prologo et al.,            | 2017 | J of vascular and interventional radiology. 2017; 28(1):24-34.e24     | non pertinent |
| 1338 | Pridgen et al.,            | 2017 | J of pain research. 2017; 10:451-460                                  | non pertinent |
| 1339 | Price et al.,              | 2017 | Clinical j of pain. 2017; 33(4):310-318                               | non pertinent |
| 1340 | Pour et al.,               | 2017 | J of acupuncture and medical studies. 2017; 10(3):187-192             | non pertinent |
| 1341 | Poply                      | 2017 | British j of pain. 2017; 11(2):10-                                    | non pertinent |
| 1342 | Polli et al.,              | 2017 | Eur J Phys Rehabil Med. 2017; 53(1):14-23                             | non pertinent |
| 1343 | Pogacnik et al.,           | 2017 | Cells Tissues Organes. 2017; 203(4):258-266                           | non pertinent |
| 1344 | Pocwierz-Marciniak et al., | 2017 | Health psychology report. 2017; 5(2):173-185                          | non pertinent |
| 1345 | Pliszka et al.,            | 2017 | J of child and adolescent psychopharmacology. 2017; 27(6):474-482     | non pertinent |
| 1346 | Pivot et al.,              | 2017 | European j of cancer (Oxford, England: 1990). 2017; 86:82-90          | non pertinent |
| 1347 | Piotrowska et al.,         | 2017 | The lancet diabetes and endocrinology. 2017; 5(3):214-223             | non pertinent |

|      |                       |      |                                                                 |               |
|------|-----------------------|------|-----------------------------------------------------------------|---------------|
| 1348 | Pinto-Sanchez et al., | 2017 | Gastroenterology. 2017; 153(2):448-459.e448                     | non pertinent |
| 1349 | Pinkerton et al.,     | 2017 | Maturitas. 2017; 100:57-63                                      | non pertinent |
| 1350 | Piedimonte et al.,    | 2017 | Eur J Pain. 2017; 21(5):874-885                                 | non pertinent |
| 1351 | Phillips et al.,      | 2017 | J of clinical oncology. 2017; 35(15)                            | non pertinent |
| 1352 | Petrofsky et al.,     | 2017 | Clinical j of sport medicine. 2017; 27(4):329-337               | non pertinent |
| 1353 | Petrella et al.,      | 2017 | European j of cancer (Oxford, England : 1990). 2017; 86:115-124 | non pertinent |
| 1354 | Petersen et al.,      | 2017 | J of Alzheimer's disease. 2017; 55(2):569-574                   | non pertinent |
| 1355 | Peter et al.,         | 2017 | J of ethnopharmacology. 2017; 209:288-293                       | non pertinent |
| 1356 | Peerdeman et al.,     | 2017 | Eur J Pain. 2017; 21(8):1366-1377                               | non pertinent |
| 1357 | Pedersen et al.,      | 2017 | European j of anaesthesiology. 2017; 34(9):602-608              | non pertinent |
| 1358 | Passamonti et al.,    | 2017 | The lancet. Oncology. 2017; 18(1):88-99                         | non pertinent |
| 1359 | Parra et al.,         | 2017 | Regional anesthesia and pain medicine. 2017; 42(1):17-24        | non pertinent |
| 1360 | Park et al.,          | 2017 | European j of cancer (Oxford, England : 1990); 83:32-42         | non pertinent |
| 1361 | Park et al.,          | 2017 | J of gastroenterology and hepatology. 2017; 32(3):589-594       | non pertinent |
| 1362 | Park et al.,          | 2017 | Physiother Theroy Pract. 2017; 33(3):218-226                    | non pertinent |
| 1363 | Pariser et al.,       | 2017 | J of drugs in dermatology. 2017; 16(2):127-132                  | non pertinent |
| 1364 | Panackal              | 2017 | J of urology. 2017; 197(4):e1217-                               | non pertinent |

|      |                    |      |                                                                                                                                              |               |
|------|--------------------|------|----------------------------------------------------------------------------------------------------------------------------------------------|---------------|
|      |                    |      | Hematological oncology. Conference: 14th international conference on malignant lymphoma palazzo die congressi. Switzerland. 2017; 35:137-138 |               |
| 1365 | Palomba et al.,    | 2017 |                                                                                                                                              | non pertinent |
| 1366 | Pactr – Gabriel    | 2017 | Pan African Clinical Trials Registry. 2017                                                                                                   | ongoing       |
| 1367 | Pactr – Ragab      | 2017 | Pan African Clinical Trials Registry. 2017                                                                                                   | non pertinent |
| 1368 | Ouellette et al.,  | 2017 | BMJ Open. 2017; 7(8):e013080                                                                                                                 | non pertinent |
| 1369 | Ory et al.,        | 2017 | J of neuropsychology. 2017; 11(3):378-395                                                                                                    | non pertinent |
| 1370 | Opoka et al.,      | 2017 | Blood. 2017; 130(24):2585-2593                                                                                                               | non pertinent |
| 1371 | Oosterhuis et al., | 2017 | J Physiother. 2017; 63(3):144-153                                                                                                            | non pertinent |
| 1372 | Olivier et al.,    | 2017 | American j of respiratory and critical care medicine. 2017; 195(6):814-823                                                                   | non pertinent |
| 1373 | Oliveira et al.,   | 2017 | Neuroimmunomodulation. 2017; 24(6):293-299                                                                                                   | non pertinent |
| 1374 | Oliva et al.,      | 2017 | The lancet. Haematology. 2017; 4(3):e127-e136                                                                                                | non pertinent |
| 1375 | Olf et al.,        | 2017 | European neuropsychopharmacology. 2017; 27:527-                                                                                              | non pertinent |
| 1376 | Okuno              | 2017 | Cardiovascular and interventional radiology. 2017; 40(2):89-                                                                                 | non pertinent |
| 1377 | Okkerse et al.,    | 2017 | British j of clinical pharmacology. 2017; 83(4):751-763                                                                                      | non pertinent |
| 1378 | Ofluoglu et al.,   | 2017 | Medicina oral, patologia oral y cirugia bucal. 2017; 22(2):e159-e166                                                                         | non pertinent |
| 1379 | Nunes et al.,      | 2017 | British j of cancer. 2017; 116(5):584-591                                                                                                    | non pertinent |
| 1380 | Nunes et al.,      | 2017 | Global spine j. 2017; 7(2):105-                                                                                                              | non pertinent |
| 1381 | Ntr – van Marle    | 2017 | Netherlands Trial Register. 2017                                                                                                             | non pertinent |

|      |                          |      |                                                          |               |
|------|--------------------------|------|----------------------------------------------------------|---------------|
| 1382 | Ntr – Hermans            | 2017 | Netherlands Trial Register. 2017                         | non pertinent |
| 1383 | Ntr - Evers              | 2017 | Netherlands Trial Register. 2017                         | non pertinent |
| 1384 | Ntr - Evers              | 2017 | Netherlands Trial Register. 2017                         | non pertinent |
| 1385 | Norrby et al.,           | 2017 | Vaccine. 2017; 35(12):1652-1661                          | non pertinent |
| 1386 | Noronha Oliveira et al., | 2017 | Implant dentistry. 2017; 26(6):832-840                   | non pertinent |
| 1387 | Noorwali et al.,         | 2017 | Proceedings of the nutrition society. 2017; 76(OCE1):E6- | non pertinent |
| 1388 | Nizamuddin et al.,       | 2017 | Medical forum mounthly. 2017; 28(7):40-43                | non pertinent |
| 1389 | Niu et al.,              | 2017 | Mol pain. 2017; 13:1744806916683684                      | non pertinent |
| 1390 | Nishizuka et al.,        | 2017 | J of orthopaedics science. 2017; 22(2):289-294           | non pertinent |
| 1391 | Nishikawa et al.,        | 2017 | International j of cancer. 2017; 140(1):188-196          | non pertinent |
| 1392 | Ning et al.,             | 2017 | J of General Internal Medicine. 2017; 32(2):495-496      | non pertinent |
| 1393 | Nielsen et al.,          | 2017 | Pain. 2017; 158(3):463-470                               | non pertinent |
| 1394 | Nielsen et al.,          | 2017 | J Physiol. 2017; 595(14):4857-4873                       | non pertinent |
| 1395 | Nicolini et al.,         | 2017 | Blood. 2017; 130                                         | non pertinent |
| 1396 | Nguyen et al.,           | 2017 | Stem cells translational medicine. 2017; 6(1):187-195    | non pertinent |
| 1397 | Negrin et al.,           | 2017 | Ann Thorac Surg. 2017; 103(5):1587-1593                  | non pertinent |
| 1398 | Nedeljkovic et al.,      | 2017 | J of Pain. 2017; 18(4):70-71                             | non pertinent |
| 1399 | Nedeljkovic et al.,      | 2017 | BMJ Open. 2017; 7(2):e011035                             | non pertinent |
| 1400 | Nct – von Horn et al.,   | 2017 | Hum Reprod. 2017 Apr.; 32(4):832-835                     | non pertinent |
| 1401 | Nct – Navalesi           | 2017 | National library of Medicine. 2017                       | non pertinent |
| 1402 | Nct – Hughes             | 2017 | National library of Medicine. 2017                       | non pertinent |
| 1403 | Nct – Wang               | 2017 | National library of Medicine. 2017                       | non pertinent |
| 1404 | Nct – Bardsley           | 2017 | National library of Medicine. 2017                       | non pertinent |
| 1405 | Nct – Chan               | 2017 | National library of Medicine. 2017                       | non pertinent |
| 1406 | Nct – Roy                | 2017 | National library of Medicine. 2017                       | non pertinent |
| 1407 | Nct – Streckmann         | 2017 | National library of Medicine. 2017                       | non pertinent |



|      |                           |      |                                                            |               |
|------|---------------------------|------|------------------------------------------------------------|---------------|
| 1408 | Nct – Winson              | 2017 | National library of Medicine. 2017                         | non pertinent |
| 1409 | Nct – Visser              | 2017 | National library of Medicine. 2017                         | non pertinent |
| 1410 | Nct – Chong               | 2017 | National library of Medicine. 2017                         | non pertinent |
| 1411 | Nct – Peolsson et al.,    | 2017 | <a href="#">BMJ Open. 2019 Feb., 9(2):e027387</a>          | non pertinent |
| 1412 | Nct – Dong et al.,        | 2017 | <a href="#">Trials. 2018 Nov.; 19(1):607</a>               | non pertinent |
| 1413 | Nct – Senthna             | 2017 | National library of Medicine. 2017                         | non pertinent |
| 1414 | Nct – Shawki              | 2017 | National library of Medicine. 2017                         | non pertinent |
| 1415 | Nct – Gohary              | 2017 | National library of Medicine. 2017                         | non pertinent |
| 1416 | Nct – Hurtado             | 2017 | National library of Medicine. 2017                         | non pertinent |
| 1417 | Nct – Iancu               | 2017 | National library of Medicine. 2017                         | non pertinent |
| 1418 | Nct – Kulu et al.,        | 2017 | <a href="#">Trials. 2018 Jul; 19(1):377</a>                | non pertinent |
| 1419 | Nct – Cha                 | 2017 | National library of Medicine. 2017                         | non pertinent |
| 1420 | Nct – Guillot             | 2017 | National library of Medicine. 2017                         | non pertinent |
| 1421 | Nct – Yesavage            | 2017 | National library of Medicine. 2017                         | non pertinent |
| 1422 | Nct – Ganapathy           | 2017 | National library of Medicine. 2017                         | non pertinent |
| 1423 | Nct – Somri               | 2017 | National library of Medicine. 2017                         | non pertinent |
| 1424 | Nct – Moberg et al.,      | 2017 | <a href="#">J Med Internet Res. 2019 Jun; 21(6):e12556</a> | non pertinent |
| 1425 | Nct - Benoit              | 2017 | National library of Medicine. 2017                         | non pertinent |
| 1426 | Nct – Gretebeck           | 2017 | National library of Medicine. 2017                         | non pertinent |
| 1427 | Nct – Wagner              | 2017 | National library of Medicine. 2017                         | non pertinent |
| 1428 | Nct – Rimmer et al.,      | 2017 | <a href="#">Contemp Clin Trials. 2018 Aug; 71:186-193</a>  | non pertinent |
| 1429 | Nct – Morris              | 2017 | National library of Medicine. 2017                         | non pertinent |
| 1430 | Nct – Kim et al.,         | 2017 | <a href="#">Trials. 2019 Jan; 20(1):56</a>                 | non pertinent |
| 1431 | Nct – Prüss-Volz          | 2017 | National library of Medicine. 2017                         | non pertinent |
| 1432 | Nct – Peolsson et al.,    | 2017 | BMC Musculoskelet Disord. 2017 Dez; 18(1):524              | non pertinent |
| 1433 | Nct – Deau                | 2017 | National library of Medicine. 2017                         | non pertinent |
| 1434 | Nct – Mescouto            | 2017 | National library of Medicine. 2017                         | non pertinent |
| 1435 | Nct – Kouvelas            | 2017 | National library of Medicine. 2017                         | non pertinent |
| 1436 | Nct – Gómez-Pérez et al., | 2017 | <a href="#">Trials. 2018 Nov; 19(1):660</a>                | non pertinent |
| 1437 | Nct – Ashar               | 2017 | National library of Medicine. 2017                         | non pertinent |

|      |                                                |      |                                                                |               |
|------|------------------------------------------------|------|----------------------------------------------------------------|---------------|
| 1438 | Nct – Wang                                     | 2017 | National library of Medicine. 2017                             | non pertinent |
| 1439 | Nct – Fitzgerald                               | 2017 | National library of Medicine. 2017                             | non pertinent |
| 1440 | Nct – Schwartz                                 | 2017 | National library of Medicine. 2017                             | non pertinent |
| 1441 | Nct – Buhrman                                  | 2017 | National library of Medicine. 2017                             | non pertinent |
| 1442 | Nct – Taipei Veterans General Hospital, Taiwan | 2017 | National library of Medicine. 2017                             | non pertinent |
| 1443 | Nct – Pacella                                  | 2017 | National library of Medicine. 2017                             | non pertinent |
| 1444 | Nayak et al.,                                  | 2017 | Antimicrobial agents and chemotherapy. 2017; 61(8)             | non pertinent |
| 1445 | Nava et al.,                                   | 2017 | Pancreatology. 2017; 17(4):34-                                 | non pertinent |
| 1446 | Musters et al.,                                | 2017 | Annals of surgery. 2017; 265(6):1074-1081                      | non pertinent |
| 1447 | Murata-Ooiwa et al.,                           | 2017 | J of arthroplasty. 2017; 32(10):3024-3028                      | non pertinent |
| 1448 | Munjal et al.,                                 | 2017 | J of headache and pain. 2017; 18(1)                            | non pertinent |
| 1449 | Mukaihara et al.,                              | 2017 | J of anesthesia. 2017; 31(6):829-836                           | non pertinent |
| 1450 | Mueller et al.,                                | 2017 | Transl Psychiatry. 2017; 7(4):e1084                            | non pertinent |
| 1451 | Motzer et al.,                                 | 2017 | J of clinical oncology. 2017; 35(35):3916-3923                 | non pertinent |
| 1452 | Moskal et al.,                                 | 2017 | Alcoholism: clinical and experimental research. 2017; 41:225A- | non pertinent |
| 1453 | Morton et al.,                                 | 2017 | Surgery for obesity and related diseases. 2017; 13(10):63-     | non pertinent |
| 1454 | Morte et al.,                                  | 2017 | American j of reproductive immunology. 2017; 78(3)             | non pertinent |
| 1455 | Morris et al.,                                 | 2017 | PLoS One. 2017; 12(2)                                          | non pertinent |
| 1456 | Morin et al.,                                  | 2017 | American j of obstetrics and gynecology. 2017                  | non pertinent |
| 1457 | Moreno et al.,                                 | 2017 | Arthritis & rheumatology. 2017; 69                             | non pertinent |
| 1458 | Morawiec et al.,                               | 2017 | BMJ Open. 2017; 7(7)                                           | non pertinent |
| 1459 | Moraska et al.,                                | 2017 | Am J Phys Med Rehabil. 2017; 96(9):639-645                     | non pertinent |
| 1460 | Morabito et al.,                               | 2017 | Lung cancer (Amsterdam, Netherlands). 2017; 108:15-21          | non pertinent |

|      |                          |      |                                                                                                                        |               |
|------|--------------------------|------|------------------------------------------------------------------------------------------------------------------------|---------------|
| 1461 | Moosmayer et al.,        | 2017 | BMC musculoskeletal disorders. 2017; 18(1):138                                                                         | non pertinent |
| 1462 | Moosa et al.,            | 2017 | National j of physiology, pharmacy and pharmacology. 2017; 7(8):839-843                                                | non pertinent |
| 1463 | Moon et al.,             | 2017 | Pain Physician. 2017; 20(2):27-35                                                                                      | non pertinent |
| 1464 | Monteith et al.,         | 2017 | Frontiers in pharmacology. 2017; 8(OCT)                                                                                | non pertinent |
| 1465 | Monreal-Carrillo et al., | 2017 | Support Care Cancer. 2017; 25(10):3143-3149                                                                            | non pertinent |
| 1466 | Monfort et al.,          | 2017 | Med Clin (Barc). 2017; 148(12):539-547                                                                                 | non pertinent |
| 1467 | Moeller et al.,          | 2017 | Cephalalgia. Conference: 18th congress of the international headache society. IHC 2017. Canada; 37(1 Supplement):70-71 | non pertinent |
| 1468 | Modak et al.,            | 2017 | Annals of cardiac anaesthesia. 2017; 20(2):163-168                                                                     | non pertinent |
| 1469 | Mizrachi et al.,         | 2017 | Human reproduction (Oxford, England). 2017; 32(6):1202-1207                                                            | non pertinent |
| 1470 | Miyamoto et al.,         | 2017 | BMC Cancer. 2017; 17(1)                                                                                                | non pertinent |
| 1471 | Miskowiak et al.,        | 2017 | J Psychopharmacol. 2017; 31(9):1215-1224                                                                               | non pertinent |
| 1472 | Minamide et al.,         | 2017 | J Orthop Sci. 2017; 22(3):377-383                                                                                      | non pertinent |
| 1473 | Miller                   | 2017 | Neurodegenerative disease management. 2017; 7(1):9-29                                                                  | non pertinent |
| 1474 | Miklowitz et al.,        | 2017 | Bipolar disorders. 2017; 19:46-47                                                                                      | non pertinent |
| 1475 | Meyer et al.,            | 2017 | The lancet. Gastroenterology & hepatology. 2017; 2(8):565-575                                                          | non pertinent |
| 1476 | Meuret et al.,           | 2017 | Depression and anxiety. 2017; 34(12):1096-1105                                                                         | non pertinent |
| 1477 | Metz et al.,             | 2017 | Neuropsychopharmacology. 2017; 42(9):1825-1832                                                                         | non pertinent |

|      |                      |      |                                                                                                                                                               |               |
|------|----------------------|------|---------------------------------------------------------------------------------------------------------------------------------------------------------------|---------------|
| 1478 | Menne et al.,        | 2017 | Nephrology, dialysis, transplantation. 2017; 32(2):307-315                                                                                                    | non pertinent |
| 1479 | Melnick et al.,      | 2017 | J of general internal medicine. Conference: 40th annual meeting of the society of general internal medicine, SGIM 2017. United states; 32(2 Supplement 1):504 | non pertinent |
| 1480 | Mell et al.,         | 2017 | International j of radiation oncology biology physics. 2017; 97(3):536-545                                                                                    | non pertinent |
| 1481 | Mekel-Bobrov et al., | 2017 | Neuromodulation. 2017; 20(2):e54-                                                                                                                             | non pertinent |
| 1482 | Mehan et al.,        | 2017 | Clinical rhinology. 2017; 10(3):113-119                                                                                                                       | non pertinent |
| 1483 | Meesters et al.,     | 2017 | Archives of disease in childhood: fetal and neonatal edition. 2017; 102(2):F167-F169                                                                          | non pertinent |
| 1484 | McLaughlin et al.,   | 2017 | Brain stimulation. 2017; 10(4):e37-                                                                                                                           | non pertinent |
| 1485 | McKay et al.,        | 2017 | Clinical cancer research. 2017; 23(4):935-945                                                                                                                 | non pertinent |
| 1486 | McEvoy et al.,       | 2017 | Contemp Clin Trials. 2017; 60:34-41                                                                                                                           | non pertinent |
| 1487 | McDonald et al.,     | 2017 | JAMA oncology. 2017; 3(7):953-959                                                                                                                             | non pertinent |
| 1488 | McDermott et al.,    | 2017 | Cancer research. Confernece: 39th annual CTRC-AACR san antonio breast cancer symposium. United states. 2017; 77(4 Supplement 1)                               | non pertinent |
| 1489 | Mazzocca et al.,     | 2017 | Arthroscopy. 2017; 33(6):1138-1148                                                                                                                            | non pertinent |
| 1490 | Mayorga et al.,      | 2017 | Scandinavian j of pain. 2017; 17:134-143                                                                                                                      | non pertinent |
| 1491 | Mayer et al.,        | 2017 | PLoS medicine. 2017; 14(11):e1002435                                                                                                                          | non pertinent |
| 1492 | May et al.,          | 2017 | Sci Rep. 2017; 7:44083                                                                                                                                        | non pertinent |

|      |                         |      |                                                                         |               |
|------|-------------------------|------|-------------------------------------------------------------------------|---------------|
| 1493 | Matsuoka et al.,        | 2017 | BMC Cancer. 2017; 17(1):674                                             | non pertinent |
| 1494 | Mathew et al.,          | 2017 | Neuropsychopharmacology. 2017; 42(13):2567-2574                         | non pertinent |
| 1495 | Matangila et al.,       | 2017 | International j of antimicrobial agents. 2017; 49(3):339-347            | non pertinent |
| 1496 | Masuda et al.,          | 2017 | Japanese j of clinical oncology. 2017; 47(5):385-392                    | non pertinent |
| 1497 | Mason et al.,           | 2017 | BMJ Open. 2017; 7(1):e014324                                            | non pertinent |
| 1498 | Mascarenhas et al.,     | 2017 | Leukemia research. 2017; 53:13-19                                       | non pertinent |
| 1499 | Maruyama et al.,        | 2017 | Canadian j of gastroenterology and hepatology. 2017                     | non pertinent |
| 1500 | Martin et al.,          | 2017 | The lancet. Oncology. 2017; 18(12):1688-1700                            | non pertinent |
| 1501 | Marth et al.,           | 2017 | European j of cancer. 2017; 70:111-121                                  | non pertinent |
| 1502 | Mariano et al.,         | 2017 | Biological psychiatry. 2017; 81(10):263-                                | non pertinent |
| 1503 | Marbury et al.,         | 2017 | Drug design, development and therapy. 2017; 11:373-382                  | non pertinent |
| 1504 | Maranon et al.,         | 2017 | Surgical endoscopy and other interventional techniques. 2017; 31(2):98- | non pertinent |
| 1505 | Maniquis-Smigel et al., | 2017 | Anesthesiology and pain medicine. 2017; 7(1)                            | non pertinent |
| 1506 | Manco-Johnson et al.,   | 2017 | J Thromb Haemost. 2017; 15(11):2115-2124                                | non pertinent |
| 1507 | Mak et al.,             | 2017 | BMJ Open. 2017; 7(7):e015191                                            | non pertinent |
| 1508 | Maitre et al.,          | 2017 | Arch Dis Child Fetal Neonatal Ed. 2017; 102(5):F428-F433                | non pertinent |
| 1509 | Maher et al.,           | 2017 | J of maternal-fetal & neonatal medicine. 2017; 30(18):2179-2184         | non pertinent |
| 1510 | Maeda et al.,           | 2017 | Brain. 2017; 140(4):914-927                                             | non pertinent |
| 1511 | Madhi et al.,           | 2017 | Expert review of vaccines. 2017; 16(6):641-656                          | non pertinent |
| 1512 | Madan et al.,           | 2017 | Vaccine. 2017; 35(10):1431-1439                                         | non pertinent |

|      |                        |      |                                                                                                                                                           |               |
|------|------------------------|------|-----------------------------------------------------------------------------------------------------------------------------------------------------------|---------------|
| 1513 | Macrinici et al.,      | 2017 | Regional anesthesia and pain medicine. 2017; 42(1):10-16                                                                                                  | non pertinent |
| 1514 | Macintyre et al.,      | 2017 | BMC medicine. 2017; 15(1)                                                                                                                                 | non pertinent |
| 1515 | Machado et al.,        | 2017 | J of neurosurgery. Conference: 85th american association of neurological surgeons annual scientific meeting, AANS 2017. United states; 126(4):A1430-A1431 | non pertinent |
| 1516 | Ma et al.,             | 2017 | Ear, nose & throat j. 2017; 96(4-5):E21                                                                                                                   | non pertinent |
| 1517 | Luz-Santos et al.,     | 2017 | Trials. 2017; 18(1):609                                                                                                                                   | non pertinent |
| 1518 | Luo et al.,            | 2017 | Paediatric drugs. 2017; 19(5):479-486                                                                                                                     | non pertinent |
| 1519 | Luo et al.,            | 2017 | Neuroimage. 2017; 162:127-137                                                                                                                             | non pertinent |
| 1520 | Lundkvist et al.,      | 2017 | Diabetes, obesity & metabolism. 2017; 19(1):49-60                                                                                                         | non pertinent |
| 1521 | Lu et al.,             | 2017 | Arthroscopy – j of arthroscopic and related surgery. 2017; 33(10):e65-                                                                                    | non pertinent |
| 1522 | Lota et al.,           | 2017 | European j of heart failure. Conference: heart failure 2017 and the 4th world congress on acute heart failure. France; 19:258                             | non pertinent |
| 1523 | Lorenz et al.,         | 2017 | Trails. 2017; 18(1)                                                                                                                                       | non pertinent |
| 1524 | Lopes de Jesus et al., | 2017 | PLoS One. 2017; 12(7):e0179185                                                                                                                            | non pertinent |
| 1525 | Löffler et al.,        | 2017 | European j of pain (London, England). 2017; 21(10):1623-1631                                                                                              | non pertinent |
| 1526 | Liu et al.,            | 2017 | Hum Brain Mapp. 2017; 38(9):4386-4397                                                                                                                     | non pertinent |
| 1527 | Liu et al.,            | 2017 | Human brain mapping. 2017; 38(10):5250-5259                                                                                                               | non pertinent |
| 1528 | Lipsman et al.,        | 2017 | Lancet Psychiatry. 2017; 4(4):285-294                                                                                                                     | non pertinent |
| 1529 | Link et al.,           | 2017 | Lancet infectious diseases. 2017; 17(8):854-866                                                                                                           | non pertinent |
| 1530 | Ling et al.,           | 2017 | Nutrients. 2017; 9(10)                                                                                                                                    | non pertinent |

|      |                      |      |                                                                   |               |
|------|----------------------|------|-------------------------------------------------------------------|---------------|
| 1531 | Lima et al.,         | 2017 | European j of pain (united kingdom). 2017; 21(1):159-165          | non pertinent |
| 1532 | Liljencrantz et al., | 2017 | European j of pain (united kingdom). 2017                         | non pertinent |
| 1533 | Ligsaw et al.,       | 2017 | J of neurodevelopmental disorders. 2017; 9(1)                     | non pertinent |
| 1534 | Liebschutz et al.,   | 2017 | JAMA internal medicine. 2017; 177(9):1265-1272                    | non pertinent |
| 1535 | Liang et al.,        | 2017 | Oncotarget. 2017; 8(31):51869-51877                               | non pertinent |
| 1536 | Li-Kim-Moy et al.,   | 2017 | J of paediatrics and child health. 2017; 53(1):47-54              | non pertinent |
| 1537 | Li et al.,           | 2017 | Cephalalgia. 2017; 37(2):161-176                                  | non pertinent |
| 1538 | Li et al.,           | 2017 | Neurologist. 2017; 22(5):157-165                                  | non pertinent |
| 1539 | Li et al.,           | 2017 | BMC rheumatology. 2017; 1(1)                                      | non pertinent |
| 1540 | Li                   | 2017 | Pharmacology & therapeutics. 2017                                 | non pertinent |
| 1541 | Levinger et al.,     | 2017 | Physical therapy in sport. 2017; 27:29-37                         | non pertinent |
| 1542 | Leung et al.,        | 2017 | Osteoarthritis and cartilage. 2017; 25:172-173                    | non pertinent |
| 1543 | Letafatkar et al.,   | 2017 | J of back and musculoskeletal rehabilitation. 2017; 30(4):767-778 | non pertinent |
| 1544 | Lelic et al.,        | 2017 | British j of clinical pharmacology. 2017; 83(4):764-776           | non pertinent |
| 1545 | Lelic et al.,        | 2017 | Neuropharmacology. 2017; 123:455-464                              | non pertinent |
| 1546 | Lefevre et al.,      | 2017 | Regulatory toxicology and pharmacology : RTP. 2017; 83:54-65      | non pertinent |
| 1547 | Lee et al.,          | 2017 | Clin Cancer Res. 2017; 23(16):4556-4568                           | non pertinent |
| 1548 | Lee et al.,          | 2017 | BMC Anesthesiol. 2017; 17(1):136                                  | non pertinent |
| 1549 | Lee et al.,          | 2017 | World neurosurgery. 2017                                          | non pertinent |

|      |                      |      |                                                                                                            |               |
|------|----------------------|------|------------------------------------------------------------------------------------------------------------|---------------|
| 1550 | Lee et al.,          | 2017 | Proceedings of the National Academy of Sciences of the United States of America. 2017; 114(45):E9445-E9454 | non pertinent |
| 1551 | Lazaridou et al.,    | 2017 | Clin J Pain. 2017; 33(3):215-221                                                                           | non pertinent |
| 1552 | Layton et al.,       | 2017 | Cardiovascular and interventional radiology. 2017; 40(2):95-97                                             | non pertinent |
| 1553 | Larsen et al.,       | 2017 | Wound repair and regeneration. 2017; 25(6):984-993                                                         | non pertinent |
| 1554 | Langhans et al.,     | 2017 | Ann Surg. 2017; 266(1):29-35                                                                               | non pertinent |
| 1555 | Laneri et al.,       | 2017 | Hum Brain Mapp. 2017; 38(8):4034-4046                                                                      | non pertinent |
| 1556 | Lane et al.,         | 2017 | Acta dermatovenereologica. 2017; 97(7):882-                                                                | non pertinent |
| 1557 | Lamusuo et al.,      | 2017 | European j of pain (united kingdom). 2017; 21(9):1505-1515                                                 | non pertinent |
| 1558 | Lagerkranser et al., | 2017 | Scandinavian j of pain. 2017                                                                               | non pertinent |
| 1559 | Labat et al.,        | 2017 | BJOG. 2017; 124(2):251-260                                                                                 | non pertinent |
| 1560 | Kurowski et al.,     | 2017 | J of head trauma rehabilitation. 2017; 32(2):79-89                                                         | non pertinent |
| 1561 | Kurganova et al.,    | 2017 | Zhurnal nevrologii i psihiatrii imeni s. 2017; 117(10):49-54                                               | non pertinent |
| 1562 | Kundu et al.,        | 2017 | Neuropsychopharmacology. 2017; 43:420-421                                                                  | non pertinent |
| 1563 | Kunas et al.,        | 2017 | European neuropsychopharmacology. 2017; 27:1005-1006                                                       | non pertinent |
| 1564 | Kumar et al.,        | 2017 | Clinical therapeutics. 2017; 39(1):150-158                                                                 | non pertinent |
| 1565 | Kristensen et al.,   | 2017 | Nutrition & metabolism. 2017; 14(1):1-11                                                                   | non pertinent |
| 1566 | Krebs et al.,        | 2017 | Contemporary clinical trials. 2017; 62:130-139                                                             | non pertinent |
| 1567 | Krafft et al.,       | 2017 | Eur J Pain. 2017; 21(9):1538-1549                                                                          | non pertinent |



|      |                            |      |                                                                                  |               |
|------|----------------------------|------|----------------------------------------------------------------------------------|---------------|
| 1568 | Kovacac et al.             | 2017 | The lancet.<br>Gastroenterology<br>& hepatology.<br>2017; 2(10):727-<br>737      | non pertinent |
| 1569 | Kotrashetti et al.,        | 2017 | International j of<br>oral and<br>maxillofacial<br>surgery. 2017;<br>46(1):54-58 | non pertinent |
| 1570 | Kong et al.,               | 2017 | Oncotarget. 2017;<br>8(4):7003-7013                                              | non pertinent |
| 1571 | Komulainen et al.,         | 2017 | Psychiatry Res<br>Neuroimaging;<br>263:61-69                                     | non pertinent |
| 1572 | Kolk et al.,               | 2017 | J Shoulder Elbow<br>Surg. 2017;<br>26(8):1407-1415                               | non pertinent |
| 1573 | Kohútová et al.,           | 2017 | Physiological<br>research. 2017;<br>66(6):1041-1047                              | non pertinent |
| 1574 | Köhler-Forsberg<br>et al., | 2017 | Depression and<br>anxiety. 2017;<br>34(3):281-290                                | non pertinent |
| 1575 | Kohl et al.,               | 2017 | BMC<br>dermatology.<br>2017; 17(1):12                                            | non pertinent |
| 1576 | Koga et al.,               | 2017 | Cancer science.<br>2017;<br>108(12):2326-<br>2332                                | non pertinent |
| 1577 | Koch et al.,               | 2017 | J Psychiatry<br>Neurosci. 2017;<br>42(5):331-342                                 | non pertinent |
| 1578 | Koban et al.,              | 2017 | J Neurosci. 2017;<br>37(13):3621-3631                                            | non pertinent |
| 1579 | Kline et al.,              | 2017 | Emergency<br>medicine j. 2017;<br>34(2):82-88                                    | non pertinent |
| 1580 | Kives et al.,              | 2017 | J of obstetrics and<br>gynaecology<br>canada. 2017;<br>39(2):82-90               | non pertinent |
| 1581 | Kim et al.,                | 2017 | Neuroreport.<br>2017; 28(14):896-<br>902                                         | non pertinent |
| 1582 | Kim et al.,                | 2017 | PLoS One. 2017;<br>12(3):e0173026                                                | non pertinent |
| 1583 | Kim et al.,                | 2017 | Medicine. 2017;<br>96(7):e6107                                                   | non pertinent |
| 1584 | Kim et al.,                | 2017 | Physical therapy<br>in sport. 2017;<br>24:67-73                                  | non pertinent |
| 1585 | Kim et al.,                | 2017 | PLoS One. 2017;<br>12(1)                                                         | non pertinent |
| 1586 | Kim et al.,                | 2017 | Diabetes, obesity<br>& metabolism.<br>2017; 19(12):1762-<br>1772                 | non pertinent |
| 1587 | Kiessling et al.,          | 2017 | Science<br>translational<br>medicine. 2017;<br>9(414)                            | non pertinent |

|      |                          |      |                                                                                                                                          |               |
|------|--------------------------|------|------------------------------------------------------------------------------------------------------------------------------------------|---------------|
| 1588 | Khalili et al.,          | 2017 | J of isfahan medical school. 2017; 34(410):1481-1486                                                                                     | non pertinent |
| 1589 | Keyan et al.,            | 2017 | Psychoneuroendocrinology. 2017; 77:150-157                                                                                               | non pertinent |
| 1590 | Kerherve et al.,         | 2017 | Frontiers in physiology. 2017; 8(APR)                                                                                                    | non pertinent |
| 1591 | Kerckhove et al.,        | 2017 | BMJ Open. 2017; 7(7):e015380                                                                                                             | non pertinent |
| 1592 | Kells et al.,            | 2017 | Veterinary anaesthesia and analgesia. 2017; 44(5):1156-1165                                                                              | non pertinent |
| 1593 | Kelleners-Smeets et al., | 2017 | J of investigative dermatology. 2017; 137(3):539-540                                                                                     | non pertinent |
| 1594 | Keles et al.,            | 2017 | J of back and musculoskeletal rehabilitation. 2017; 30(3):543-550                                                                        | non pertinent |
| 1595 | Kay et al.,              | 2017 | Human psychopharmacology. 32(4)                                                                                                          | non pertinent |
| 1596 | Kawalder et al.,         | 2017 | British j of haematology. Conference: 57th annual scientific meetin of the british society for haematology. United kingdom. 2017; 176:18 | non pertinent |
| 1597 | Kaufman                  | 2017 | Expert opinion on pharmacotherapy. 2017; 18(4):433-444                                                                                   | non pertinent |
| 1598 | Katz et al.,             | 2017 | Acad Emerg Med. 2017; 24(8):968-982                                                                                                      | non pertinent |
| 1599 | Kato et al.,             | 2017 | Pancreas. 2017; 46(7):880-886                                                                                                            | non pertinent |
| 1600 | Karaduman et al.,        | 2017 | Pain research & management. 2017:2454267                                                                                                 | non pertinent |
| 1601 | Karabayirli et al.,      | 2017 | European archives of oto-laryngology. 2017; 274(1):239-245                                                                               | non pertinent |
| 1602 | Kapoor et al.,           | 2017 | J of anaesthesiology, clinical pharmacology. 2017; 33(2):164-171                                                                         | non pertinent |
| 1603 | Kamenov et al.,          | 2017 | Maturitas. 2017; 99:20-26                                                                                                                | non pertinent |

|      |                          |      |                                                                                          |               |
|------|--------------------------|------|------------------------------------------------------------------------------------------|---------------|
| 1604 | Kalita et al.,           | 2017 | Neurol India.<br>2017; 65(3):506-511                                                     | non pertinent |
| 1605 | Kalfon et al.,           | 2017 | Intesive Care<br>Med. 2017;<br>43(12):1829-1840                                          | non pertinent |
| 1606 | Jung et al.,             | 2017 | American j of<br>orthodontics and<br>dentofacial<br>orthopedics. 2017;<br>152(5):582-591 | non pertinent |
| 1607 | Juliato et al.,          | 2017 | Climacteric. 2017;<br>20(1):62-66                                                        | non pertinent |
| 1608 | Juel et al.,             | 2017 | Pancreas. 2017;<br>46(2):170-176                                                         | non pertinent |
| 1609 | Jprn, Umin -<br>Sunagawa | 2017 | UMIN Clinical<br>Trials Registry.<br>2017                                                | non pertinent |
| 1610 | Jprn, Umin -<br>Uehara   | 2017 | UMIN Clinical<br>Trials Registry.<br>2017                                                | non pertinent |
| 1611 | Jprn, Umin -<br>Mizuno   | 2017 | UMIN Clinical<br>Trials Registry.<br>2017                                                | non pertinent |
| 1612 | Johansson et al.,        | 2017 | British j of clinical<br>pharmacology.<br>2017; 83(9):2008-2014                          | non pertinent |
| 1613 | Johannsen et al.,        | 2017 | Psycho-oncology.<br>2017; 26(12):2208-2214                                               | non pertinent |
| 1614 | Jinno et al.,            | 2017 | Nutrients. 2017;<br>9(3)                                                                 | non pertinent |
| 1615 | Jeon et al.,             | 2017 | The lancet<br>gastroenterology<br>and hepatology.<br>2017; 2(11):793-804                 | non pertinent |
| 1616 | Jensen et al.,           | 2017 | BMC<br>complementary<br>and alternative<br>medicine. 2017;<br>17                         | non pertinent |
| 1617 | Jeffcoate et al.,        | 2017 | Health technology<br>assessment. 2017;<br>21(34)                                         | non pertinent |
| 1618 | Jayne et al.,            | 2017 | J of the american<br>science of<br>nephrology : JASN.<br>2017; 28(9):2756-2767           | non pertinent |
| 1619 | Jawad et al.,            | 2017 | BMC oral health.<br>2017; 17(1):53                                                       | non pertinent |
| 1620 | Janvier et al.,          | 2017 | J of nuclear<br>cardiology. 2017;<br>24(1):34-40                                         | non pertinent |
| 1621 | Jang et al.,             | 2017 | BMC Anesthesiol.<br>2017; 17(1):73                                                       | non pertinent |
| 1622 | Jamshidi et al.,         | 2017 | Arthritis research<br>& therapy. 2017;<br>19(1)                                          | non pertinent |
| 1623 | Jahangard et al.,        | 2017 | Psychiatry<br>research. 2017;<br>251:182-191                                             | non pertinent |

|      |                                   |      |                                                                  |               |
|------|-----------------------------------|------|------------------------------------------------------------------|---------------|
| 1624 | Jacob et al.,                     | 2017 | American j of gastroenterology. 2017; 112: 663-664               | non pertinent |
| 1625 | Isrctn – Small                    | 2017 | ISRCTN Registry. 2017                                            | non pertinent |
| 1626 | Isrctn – Bibby                    | 2017 | ISRCTN Registry. 2017                                            | non pertinent |
| 1627 | Isrctn – de Bono                  | 2017 | ISRCTN Registry. 2017                                            | non pertinent |
| 1628 | Isrctn – Fennell                  | 2017 | ISRCTN Registry. 2017                                            | non pertinent |
| 1629 | Isrctn – Gusi                     | 2017 | ISRCTN Registry. 2017                                            | non pertinent |
| 1630 | Isrctn – Little                   | 2017 | ISRCTN Registry. 2017                                            | non pertinent |
| 1631 | Isrctn – Thew                     | 2017 | ISRCTN Registry. 2017                                            | non pertinent |
| 1632 | Isrctn – Søgaaard                 | 2017 | ISRCTN Registry. 2017                                            | non pertinent |
| 1633 | Isrctn – Davies                   | 2017 | ISRCTN Registry. 2017                                            | non pertinent |
| 1634 | Isrctn – Ritter                   | 2017 | ISRCTN Registry. 2017                                            | non pertinent |
| 1635 | Irct200912150028<br>61N - Masoudi | 2017 | IRCT – Iranian Registry of Clinical Trials. 2017                 | non pertinent |
| 1636 | Irct201702232772<br>8N – Mahmoodi | 2017 | IRCT – Iranian Registry of Clinical Trials. 2017                 | non pertinent |
| 1637 | Irct201512142552<br>3N - Dadashi  | 2017 | IRCT – Iranian Registry of Clinical Trials. 2017                 | non pertinent |
| 1638 | Irct201606091959<br>N - Malakouti | 2017 | IRCT – Iranian Registry of Clinical Trials. 2017                 | non pertinent |
| 1639 | Inusa et al.,                     | 2017 | Blood. 2017; 130                                                 | non pertinent |
| 1640 | Imam                              | 2017 | J of nephrology. 2017; 30(6):803-809                             | non pertinent |
| 1641 | Ide et al.,                       | 2017 | Orthopaedic j of sports medicine. 2017; 5(9)                     | non pertinent |
| 1642 | Ide et al.,                       | 2017 | Brain stimulation. 2017; 10(2):522-523                           | non pertinent |
| 1643 | Ibrahimi et al.,                  | 2017 | Cephalalgia. 2017; 37(1):94-98                                   | non pertinent |
| 1644 | Hwang et al.,                     | 2017 | World J Gastroenterol. 2017; 23(25):4615-4623                    | non pertinent |
| 1645 | Husain et al.,                    | 2017 | J of psychopharmacology (Oxford, England). 2017; 31(9):1166-1175 | non pertinent |

|      |                           |      |                                                                                                                                                                                           |               |
|------|---------------------------|------|-------------------------------------------------------------------------------------------------------------------------------------------------------------------------------------------|---------------|
| 1646 | Humaidan et al.,          | 2017 | Human reproduction (Oxford, England). 2017; 32(3):544-555                                                                                                                                 | non pertinent |
| 1647 | Hull et al.,              | 2017 | Current alzheimer research. 2017; 14(7):696-708                                                                                                                                           | non pertinent |
| 1648 | Huffman et al.,           | 2017 | Clin J Pain. 2017; 33(7):569-578                                                                                                                                                          | non pertinent |
| 1649 | Huddart et al.,           | 2017 | International j of radiation oncology biology physics. 2017; 99(2):118-119                                                                                                                | non pertinent |
| 1650 | Hu et al.,                | 2017 | Saudi j of gastroenterology. 2017; 23(5):275-280                                                                                                                                          | non pertinent |
| 1651 | Hsu et al.,               | 2017 | PLoS One. 2017; 12(9)                                                                                                                                                                     | non pertinent |
| 1652 | Hovingh et al.,           | 2017 | J of clinical lipidology. 2017; 11(6):1448-1457                                                                                                                                           | non pertinent |
| 1653 | Hovdenak Jakobsen et al., | 2017 | Acta Oncol. 2017; 56(2):307-313                                                                                                                                                           | non pertinent |
| 1654 | Hoppe et al.,             | 2017 | British j of haematology. 2017; 177(4):620-629                                                                                                                                            | non pertinent |
| 1655 | Hopewell et al.,          | 2017 | BMJ Open. 2017; 7(7):e018004                                                                                                                                                              | non pertinent |
| 1656 | Hollinger et al.,         | 2017 | BMJ Open. 2017; 7(7):e015783                                                                                                                                                              | non pertinent |
| 1657 | Hofmann et al.,           | 2017 | Transfusion. 2017; 57:99A-                                                                                                                                                                | non pertinent |
| 1658 | Hochhaus et al.,          | 2017 | New England j of medicine. 2017; 376(10):917-927                                                                                                                                          | non pertinent |
| 1659 | Ho et al.,                | 2017 | Skeletal radiology. Conference: 40th annual scientific meeting of the society of skeletal radiology. United states. Conference start: 20170319. Conference end: 20170322. 2017; 45(3):431 | non pertinent |
| 1660 | Hirsch et al.,            | 2017 | Clinical lung cancer. 2017; 18(1):43-49                                                                                                                                                   | non pertinent |
| 1661 | Hidalgo-Tenorio et al.,   | 2017 | AIDS research and therapy. 2017; 14(1)                                                                                                                                                    | non pertinent |
| 1662 | Herrmann et al.,          | 2017 | Brain stimuli. 2017; 10(2):291-297                                                                                                                                                        | non pertinent |
| 1663 | Hellerstein et al.,       | 2017 | J of affective disorders. 2017; 210:258-264                                                                                                                                               | non pertinent |

|      |                            |      |                                                                                              |               |
|------|----------------------------|------|----------------------------------------------------------------------------------------------|---------------|
| 1664 | Heller et al.,             | 2017 | Health technology<br>assessment.<br>2017; 21(20):1-<br>277                                   | non pertinent |
| 1665 | Heimbürger et al.,         | 2017 | European j of<br>nuclear medicine<br>and molecular<br>imaging: 1-9                           | non pertinent |
| 1666 | Heidenreich et al.,        | 2017 | European urology.<br>2017; 71(4):534-<br>542                                                 | non pertinent |
| 1667 | Heeren et al.,             | 2017 | Soc Cogn Affect<br>neurosci. 2017;<br>12(2):251-260                                          | non pertinent |
| 1668 | Hebestreit et al.,         | 2017 | J of headache and<br>pain. 2017;<br>18(1):116                                                | non pertinent |
| 1669 | Hebestreit et al.,         | 2017 | PLoS One. 2017;<br>12(10):e0184406                                                           | non pertinent |
| 1670 | Hebestreit et al.,         | 2017 | Cephalalgia. 2017;<br>37(1):21-                                                              | non pertinent |
| 1671 | Hebestreit et al.,         | 2017 | J Headache Pain.<br>2017; 18(1):116                                                          | non pertinent |
| 1672 | Heapy et al.,              | 2017 | JAMA internal<br>medicine. 2017;<br>177(6):765-773                                           | non pertinent |
| 1673 | He et al.,                 | 2017 | Biomedical<br>research (india).<br>2017; 28(4):1890-<br>1893                                 | non pertinent |
| 1674 | Harrington et al.,         | 2017 | Lancet oncology.<br>2017; 18(8):1104-<br>1115                                                | non pertinent |
| 1675 | Hardy-Fairbanks<br>et al., | 2017 | J of obstetrics and<br>gynaecology.<br>2017; 37(8):1009-<br>1014                             | non pertinent |
| 1676 | Handen et al.,             | 2017 | J of the American<br>Academy of Child<br>and Adolescent<br>Psychiatry. 2017;<br>849-856.e846 | non pertinent |
| 1677 | Han et al.,                | 2017 | BMC Cancer.<br>2017; 17(1)                                                                   | non pertinent |
| 1678 | Han et al.,                | 2017 | J Clin Anesth.<br>2017; 37:86-91                                                             | non pertinent |
| 1679 | Han et al.,                | 2017 | Cancer research<br>and treatment.<br>2017; 49(1):10-19                                       | non pertinent |
| 1680 | Hamiditabar et<br>al.,     | 2017 | Clinical nuclear<br>medicine. 2017                                                           | non pertinent |
| 1681 | Halawi et al.,             | 2017 | The lancet<br>gastroenterology<br>and hepatology.<br>2017; 2(12):842-<br>843                 | non pertinent |
| 1682 | Hageman et al.,            | 2017 | Archives of<br>trauma research.<br>2017; 6(1)                                                | non pertinent |
| 1683 | Hachach-Haram<br>et al.,   | 2017 | International<br>wound j. 2017;<br>14(1):241-249                                             | non pertinent |
| 1684 | Habig et al.,              | 2017 | BMC Neurol.<br>2017; 17(1):184                                                               | non pertinent |
| 1685 | Haaker et al.,             | 2017 | Nat Commun.<br>2017; 8:15495                                                                 | non pertinent |

|      |                        |      |                                                                                                                                 |               |
|------|------------------------|------|---------------------------------------------------------------------------------------------------------------------------------|---------------|
| 1686 | Guo et al.,            | 2017 | Archives of physical medicine and rehabilitation. 2017; 98(1):36-42                                                             | non pertinent |
| 1687 | Guo et al.,            | 2017 | Medicine (united states). 2017; 96(51)                                                                                          | non pertinent |
| 1688 | Guillemont et al.,     | 2017 | Health education research. 2017; 32(4):332-342                                                                                  | non pertinent |
| 1689 | Guerard et al.,        | 2017 | Orphanet j of rare diseases. 2017; 12(1)                                                                                        | non pertinent |
| 1690 | Gucalp et al.,         | 2017 | Cancer research. Conference: 39th annual CTSC-AACR san antonio breast cancer symposium. United states. 2017; 77(4 Supplement 1) | non pertinent |
| 1691 | Gu et al.,             | 2017 | Molecular pain. 2017; 13                                                                                                        | non pertinent |
| 1692 | Grothe et al.,         | 2017 | Osteoarthritis and cartilage. 2017; 25(1):46-52                                                                                 | non pertinent |
| 1693 | Groenvold et al.,      | 2017 | Palliative medicine. 2017; 31(9):814-824                                                                                        | non pertinent |
| 1694 | Gozzi et al.,          | 2017 | Neuropsychopharmacology. 2017; 42(7):1409-1419                                                                                  | non pertinent |
| 1695 | Govindasamy et al.,    | 2017 | J of clinical and diagnostic research. 2017; 11(2):RC13-RC16                                                                    | non pertinent |
| 1696 | Gorodetzky et al.,     | 2017 | Drug and alcohol dependence. 2017; 176:79-88                                                                                    | non pertinent |
| 1697 | Gordon et al.,         | 2017 | J of sports medicine and physical fitness. 2017; 57(12):1669-1675                                                               | non pertinent |
| 1698 | Goodman et al.,        | 2017 | J of clinical psychiatry. 2017; 78(1):105-114                                                                                   | non pertinent |
| 1699 | Gonzalez-Osuna et al., | 2017 | Contemporary clinical trials. 2017; 61:16-22                                                                                    | non pertinent |
| 1700 | Gongora et al.,        | 2017 | J of the American College of Cardiology. 2017; 69(11):1428-                                                                     | non pertinent |
| 1701 | Gomez-Rios et al.,     | 2017 | J Matern Fetal Neonatal Med. 2017; 30(4):437-441                                                                                | non pertinent |
| 1702 | Goldthorpe et al.,     | 2017 | J Oral Facial Pain Headache. 2017; 31(1):61-71                                                                                  | non pertinent |

|      |                      |      |                                                                                                                                                 |               |
|------|----------------------|------|-------------------------------------------------------------------------------------------------------------------------------------------------|---------------|
| 1703 | Gojo et al.,         | 2017 | Clinical cancer research. 2017; 23(3):697-706                                                                                                   | non pertinent |
| 1704 | Glincher et al.,     | 2017 | Pediatric blood and cancer. Conference: 30th annual meeting of the american society of pediatric hematology/oncology. ASPHO 2017. Canada; 64:89 | non pertinent |
| 1705 | Glasser et al.,      | 2017 | J of the peripheral nervous system. 2017; 22(3):291-292                                                                                         | non pertinent |
| 1706 | Gibson               | 2017 | J of gastroenterology and hepatology (australia). 2017; 32:32-35                                                                                | non pertinent |
| 1707 | Ghazikhanian et al., | 2017 | Bone Marrow Transplant. 2017; 52(2):279-284                                                                                                     | non pertinent |
| 1708 | George et al.,       | 2017 | Contemporary clinical trials. 2017; 56-9-17                                                                                                     | non pertinent |
| 1709 | George et al.,       | 2017 | European j of cancer. 2017; 76:52-59                                                                                                            | non pertinent |
| 1710 | Gao et al.,          | 2017 | Artificals cells, nanomedicine and biotechnology. 2017; 45(5):1045-1050                                                                         | non pertinent |
| 1711 | Gane et al.,         | 2017 | ACS infectious diseases. 2017; 3(2):144-151                                                                                                     | non pertinent |
| 1712 | Gagnadoux et al.,    | 2017 | American j of respiratory and critical care medicine. 2017; 195(9):1244-1252                                                                    | non pertinent |
| 1713 | Fukushima et al.,    | 2017 | Supportive care in cancer. 2017; 1-8                                                                                                            | non pertinent |
| 1714 | Fujioka et al.,      | 2017 | JPEN. J of parenetal and enteral nutrition. 2017; 41(8):1419-1422                                                                               | non pertinent |
| 1715 | Fujino et al.,       | 2017 | EBioMedicine. 2017; 17:199-205                                                                                                                  | non pertinent |
| 1716 | Fries et al.,        | 2017 | Immunity and ageing. 2017; 14(1)                                                                                                                | non pertinent |
| 1717 | Fried et al.,        | 2017 | J Am Geriatr Soc. 2017; 65(10):2265-2271                                                                                                        | non pertinent |
| 1718 | Frias et al.,        | 2017 | Diabetes, obesity & metabolism. 2017; 19(1):40-48                                                                                               | non pertinent |



|      |                       |      |                                                                                                       |               |
|------|-----------------------|------|-------------------------------------------------------------------------------------------------------|---------------|
| 1719 | Frey et al,           | 2017 | Pain Physician.<br>2017; 20(7):E1063-<br>e1072                                                        | non pertinent |
| 1720 | Freund et al,         | 2017 | Annals of<br>emergency<br>medicine. 2017;<br>70(4):30-                                                | non pertinent |
| 1721 | Frenck et al,         | 2017 | Vaccine. 2017;<br>35(2):375-384                                                                       | non pertinent |
| 1722 | Franko et al,         | 2017 | J of hand surgery.<br>2017; 42(3):175-<br>181.e171                                                    | non pertinent |
| 1723 | Fordyce et al,        | 2017 | JAMA Cardiol.<br>2017; 2(4):400-<br>408                                                               | non pertinent |
| 1724 | Fleischmann et<br>al, | 2017 | Arthritis &<br>rheumatology.<br>2017; 69                                                              | non pertinent |
| 1725 | Fitzgerald et al,     | 2017 | New England j of<br>medicine. 2017;<br>376(1):41-51                                                   | non pertinent |
| 1726 | Fernandez et al,      | 2017 | Cerebellum. 2017;<br>16(1):168-177                                                                    | non pertinent |
| 1727 | Ferencik et al,       | 2017 | European heart j.<br>2017; 38:652-653                                                                 | non pertinent |
| 1728 | Fensky et al,         | 2017 | J of neural<br>transmission.<br>2017;<br>124(10):1313-                                                | non pertinent |
| 1729 | Feng et al,           | 2017 | BMJ Open. 2017;<br>7(10):e017227                                                                      | non pertinent |
| 1730 | Faria et al,          | 2017 | EBioMedicine.<br>2017; 24:179-188                                                                     | non pertinent |
| 1731 | Fann et al,           | 2017 | J of the head<br>trauma<br>rehabilitation.<br>2017; 32(5):332-<br>342                                 | non pertinent |
| 1732 | Fan et al,            | 2017 | Medicine. 2017;<br>96(7):e6106                                                                        | non pertinent |
| 1733 | Falloon et al,        | 2017 | Clinical and<br>vaccine<br>immunology.<br>2017; 24(9)                                                 | non pertinent |
| 1734 | Fallon et al,         | 2017 | British j of pain.<br>2017; 11(3):119-<br>133                                                         | non pertinent |
| 1735 | Falla et al,          | 2017 | Physiotherapy<br>(united kingdom).<br>2017; 103:e84-                                                  | non pertinent |
| 1736 | Ezhov et al,          | 2017 | Atherosclerosis.<br>Supplements<br>30:187-192                                                         | non pertinent |
| 1737 | Exler et al,          | 2017 | Med Decis<br>Making. 2017;<br>37(6):725-729                                                           | non pertinent |
| 1738 | Everaerd et al,       | 2017 | Biological<br>psychiatry.<br>Cognitive<br>neuroscience and<br>neuroimaging.<br>2017; 2(7):591-<br>598 | non pertinent |

|      |                                                                   |      |                                                              |               |
|------|-------------------------------------------------------------------|------|--------------------------------------------------------------|---------------|
| 1739 | Euctr – Netherlands Cancer Institute                              | 2017 | EU Clinical Trial Register. 2017                             | non pertinent |
| 1740 | Euctr - Roussy                                                    | 2017 | EU Clinical Trial Register. 2017                             | non pertinent |
| 1741 | Euctr – MRI Research Unit. Radiology Department, Hospital del Mar | 2017 | EU Clinical Trial Register. 2017                             | non pertinent |
| 1742 | Euctr - AlfaSigma                                                 | 2017 | EU Clinical Trial Register. 2017                             | non pertinent |
| 1743 | Euctr – RWTH Aachen University/CTC-A                              | 2017 | EU Clinical Trial Register. 2017                             | non pertinent |
| 1744 | Emoto et al.,                                                     | 2017 | Endocrine j. 2017; 64(2):191-206                             | non pertinent |
| 1745 | Elkins et al.,                                                    | 2017 | The lancet neurology. 2017; 16(3):217-226                    | non pertinent |
| 1746 | Eljezi et al.,                                                    | 2017 | European j of anesthesiology. 2017; 34(2):56-65              | non pertinent |
| 1747 | Eljezi et al.,                                                    | 2017 | Pain Physician. 2017; 20(6):                                 | non pertinent |
| 1748 | Eker et al.,                                                      | 2017 | J of anesthesia. 2017; 31(2):206-211                         | non pertinent |
| 1749 | Eisner et al.,                                                    | 2017 | Stereotactic and functional neurosurgery. 2017; 95:367-      | non pertinent |
| 1750 | Ebrahimi et al.,                                                  | 2017 | Neurobiology of learning and memory. 2017; 142(Pt B):209-217 | non pertinent |
| 1751 | Ebert et al.,                                                     | 2017 | Am J Sports Med. 2017; 45(13):2965-2974                      | non pertinent |
| 1752 | Ebata et al.,                                                     | 2017 | J Bone Joint Surg Am. 2017; 99(5):365-372                    | non pertinent |
| 1753 | Durie et al.,                                                     | 2017 | Lancet (london, england). 2017; 389(10068):519-527           | non pertinent |
| 1754 | Dunbar et al.,                                                    | 2017 | Clinical and translational science. 2017; 10(6):455-469      | non pertinent |
| 1755 | Dufour et al.,                                                    | 2017 | International j of cardiology. 2017; 228:754-760             | non pertinent |
| 1756 | Duffield et al.,                                                  | 2017 | Anesthesia and Analgesia. 2017; 124(3):857-862               | non pertinent |
| 1757 | Drottning et al.,                                                 | 2017 | J of headache and pain. 2017; 18(1)                          | non pertinent |
| 1758 | Drks - Lis                                                        | 2017 | Deutsches Register klinischer Studien. 2017                  | non pertinent |
| 1759 | Drks - Haukkala                                                   | 2017 | Deutsches Register klinischer Studien. 2017                  | non pertinent |

|      |                       |      |                                                                                                       |               |
|------|-----------------------|------|-------------------------------------------------------------------------------------------------------|---------------|
| 1760 | Drks - Boecker        | 2017 | Deutsches Register klinischer Studien. 2017                                                           | non pertinent |
| 1761 | Drks - Lotze          | 2017 | Deutsches Register klinischer Studien. 2017                                                           | non pertinent |
| 1762 | Drks – Meyer-Friessem | 2017 | Deutsches Register klinischer Studien. 2017                                                           | non pertinent |
| 1763 | Drks - Flor           | 2017 | Deutsches Register klinischer Studien. 2017                                                           | non pertinent |
| 1764 | Dougados et al.,      | 2017 | Annals of the rheumatic diseases. 2017; 76(1):88-95                                                   | non pertinent |
| 1765 | Dorff et al.,         | 2017 | Cancer. 2017; 123(23):4566-4573                                                                       | non pertinent |
| 1766 | Doran et al.,         | 2017 | J of nuclear cardiology. 2017; 24(3):1062-1070                                                        | non pertinent |
| 1767 | Donaldson et al.,     | 2017 | Brain stimulation. Conference: 2nd international brain stimulation conference. Spain. 2017; 10(2):378 | non pertinent |
| 1768 | Dolzhevikova et al.,  | 2017 | Human vaccines and immunotherapeutics. 2017; 13(3):613-620                                            | non pertinent |
| 1769 | Dessery et al.,       | 2017 | Prosthetics and orthotics international. 2017; 41(4):356-363                                          | non pertinent |
| 1770 | Derksen et al.,       | 2017 | J of cachexia, sarcopenia and muscle. 2017; 8(6):1013-                                                | non pertinent |
| 1771 | Dengler et al.,       | 2017 | Pain Physician. 2017; 20(6):537-550                                                                   | non pertinent |
| 1772 | Deng et al.,          | 2017 | PLoS One. 2017; 12(12)                                                                                | non pertinent |
| 1773 | DelBello et al.,      | 2017 | J of the American Academy of Child and Adolescent Psychiatry. 2017; 56(12):1015-1025                  | non pertinent |
| 1774 | Delage et al.,        | 2017 | Trials. 18(1):517                                                                                     | non pertinent |
| 1775 | Del Blanco et al.,    | 2017 | Nurse education today. 2017; 55:45-53                                                                 | non pertinent |
| 1776 | Del Blanco et al.,    | 2017 | Nurse Educ Today. 2017; 55:45-53                                                                      | non pertinent |

|      |                        |      |                                                                       |               |
|------|------------------------|------|-----------------------------------------------------------------------|---------------|
| 1777 | Dehghani et al.,       | 2017 | American heart j. 2017; 192:105-112                                   | non pertinent |
| 1778 | Dedic et al.,          | 2017 | European heart j. 2017; 38:90-                                        | non pertinent |
| 1779 | De Prates et al.,      | 2017 | Clinical infectious diseases. 2017; 64(1):67-71                       | non pertinent |
| 1780 | De Niet et al.,        | 2017 | The lancet. Gastroenterology & hepatology. 2017; 2(8):576-584         | non pertinent |
| 1781 | De la Gala et al.,     | 2017 | British j of anaesthesia. 2017; 119(4):655-663                        | non pertinent |
| 1782 | Davis et al.,          | 2017 | Br J Neurosurg. 2017; 31(2):205-208                                   | non pertinent |
| 1783 | Daud et al.,           | 2017 | J of hematology & oncology. 2017; 10(1):1-9                           | non pertinent |
| 1784 | Das et al.,            | 2017 | PLoS One. 2017; 12(3)                                                 | non pertinent |
| 1785 | Danne et al.,          | 2017 | J of pediatrics. 2017; 181:146-153                                    | non pertinent |
| 1786 | Dagan et al.,          | 2017 | Experimental brain research. 2017; 235(8):2463-2472                   | non pertinent |
| 1787 | Dadey                  | 2017 | American j of therapeutics. 2017; 24(4):e373-e380                     | non pertinent |
| 1788 | Curtin et al.,         | 2017 | J of hand surgery. 2017; 42(3):166-174                                | non pertinent |
| 1789 | Cunningham et al.,     | 2017 | The lancet. Oncology. 2017; 18(3):357-370                             | non pertinent |
| 1790 | Culver et al.,         | 2017 | Investigative ophthalmology & visual science. 2017; 58(6):BIO52-BIO60 | non pertinent |
| 1791 | Ctrl - Kumar           | 2017 | Clinical Trials Registry India. 2017                                  | non pertinent |
| 1792 | Ctrl - Mallikarjunaiah | 2017 | Clinical Trials Registry India. 2017                                  | non pertinent |
| 1793 | Cruz-Diaz et al.,      | 2017 | Complementary therapies in medicine. 2017; 33:72-77                   | non pertinent |
| 1794 | Cremon et al.,         | 2017 | Alimentary pharmacology & therapeutics. 2017; 45(7):909-922           | non pertinent |
| 1795 | Cranston et al.,       | 2017 | Trials. 2017; 18(1):111                                               | non pertinent |

|      |                 |      |                                                                                                                   |               |
|------|-----------------|------|-------------------------------------------------------------------------------------------------------------------|---------------|
| 1796 | Cranen et al.,  | 2017 | J of medical internet research. 2017; 19(1):e26                                                                   | non pertinent |
| 1797 | Coyne et al.,   | 2017 | Clinical therapeutics. 2017; 39(1):75-88                                                                          | non pertinent |
| 1798 | Coyle et al.,   | 2017 | Alimentary pharmacology & therapeutics. 2017; 45(12):1524-1533                                                    | non pertinent |
| 1799 | Cortes et al.,  | 2017 | Brain stimulation. 2017; 10(1):e13-                                                                               | non pertinent |
| 1800 | Cortes et al.,  | 2017 | Haematologica. 2017; 102(3):519-528                                                                               | non pertinent |
| 1801 | Cooper et al.,  | 2017 | Physiotherapy (united kingdom). 2017; 103:e117-e118                                                               | non pertinent |
| 1802 | Collaku et al., | 2017 | J of pain research. 2017; 10:669-678                                                                              | non pertinent |
| 1803 | Colic et al.,   | 2017 | European neuropsychopharmacology. 2017; 27:704-705                                                                | non pertinent |
| 1804 | Coffeng et al., | 2017 | European j of neurology. Conference: 3rd congress of the european academy of neurology. Netherlands. 2017; 24:220 | non pertinent |
| 1805 | Clave et al.,   | 2017 | Therapeutic advances in gastroenterology. 2017; 10(3):311-322                                                     | non pertinent |
| 1806 | Clark           | 2017 | Cardiovascular and interventional radiology. 2017; 40(2):94-                                                      | non pertinent |
| 1807 | Chupp et al.,   | 2017 | Lancet Respir Med. 2017; 5(5):390-400                                                                             | non pertinent |
| 1808 | Chung et al.,   | 2017 | Arthritis care & research. 2017; 69(7):973-981                                                                    | non pertinent |
| 1809 | Chu et al.,     | 2017 | J of addiction medicine. 2017; 11(5):342-349                                                                      | non pertinent |
| 1810 | Chomiak et al., | 2017 | Medicine (Baltimore). 2017; 96(5):e5934                                                                           | non pertinent |
| 1811 | Choi et al.,    | 2017 | Medicine (Baltimore). 2017; 96(16):e6670                                                                          | non pertinent |
| 1812 | Choe et al.,    | 2017 | Clin Exp Pharmacol Physiol. 2017; 44(1):30-40                                                                     | non pertinent |

|      |                           |      |                                                                              |               |
|------|---------------------------|------|------------------------------------------------------------------------------|---------------|
| 1813 | Cho et al.,               | 2017 | BMC<br>complementary<br>and alternative<br>medicine. 2017;<br>17(1)          | non pertinent |
| 1814 | Cho et al.,               | 2017 | International j of<br>clinical practice.<br>2017; 71(5)                      | non pertinent |
| 1815 | Chi – Dapeng              | 2017 | Chinese Clinical<br>Trial Registry.<br>2017                                  | non pertinent |
| 1816 | Chi – Aihong              | 2017 | Chinese Clinical<br>Trial Registry.<br>2017                                  | non pertinent |
| 1817 | Chi –Shi                  | 2017 | Chinese Clinical<br>Trial Registry.<br>2017                                  | non pertinent |
| 1818 | Chi – Zeng                | 2017 | Chinese Clinical<br>Trial Registry.<br>2017                                  | non pertinent |
| 1819 | Cheng et al.,             | 2017 | Sci Rep. 2017;<br>7(1):13054                                                 | non pertinent |
| 1820 | Chen et al.,              | 2017 | PLoS One. 2017;<br>12(5)                                                     | non pertinent |
| 1821 | Chen et al.,              | 2017 | Molecular<br>genetics and<br>metabolism. 2017;<br>120(1-2):35-               | non pertinent |
| 1822 | Chatelain et al.,         | 2017 | J of clinical<br>endocrinology and<br>metabolism. 2017;<br>102(5): 1673-1682 | non pertinent |
| 1823 | Chapman et al.,           | 2017 | Annals of<br>oncology. 2017;<br>28(10):2581-2587                             | non pertinent |
| 1824 | Chang et al.,             | 2017 | PLoS One. 2017;<br>12(6):e0180328                                            | non pertinent |
| 1825 | Chai et al.,              | 2017 | IEEE Trans<br>Neural Syst<br>Rehabil Eng. 2017;<br>25(5):469-480             | non pertinent |
| 1826 | Cavalli et al.,           | 2017 | Soc Cogn Affect<br>Neurosci. 2017;<br>12(6):976-983                          | non pertinent |
| 1827 | Cattaneo et al.,          | 2017 | J of parkinson's<br>disease. 2017;<br>7(1):95-101                            | non pertinent |
| 1828 | Castro-Sanchez et<br>al., | 2017 | Pain Physician.<br>2017; 20(2):37-52                                         | non pertinent |
| 1829 | Castro et al.,            | 2017 | J Clin Monit<br>Comput. 2017;<br>31(4):851-860                               | non pertinent |
| 1830 | Cash et al.,              | 2017 | Therapeutic<br>advances in<br>gastroenterology.<br>2017; 10(9):689-<br>699   | non pertinent |

|      |                        |      |                                                                                                                       |               |
|------|------------------------|------|-----------------------------------------------------------------------------------------------------------------------|---------------|
| 1831 | Cascavilla et al.,     | 2017 | Haematologica. Conference: 46th congress of the italian society of hematology. Italy. 2017; 102(Supplement 3):112-113 | non pertinent |
| 1832 | Carello et al.,        | 2017 | Italian j of pediatrics. 2017; 43(1)                                                                                  | non pertinent |
| 1833 | Cao et al.,            | 2017 | Pain Physician. 2017; 20(5):E687-e699                                                                                 | non pertinent |
| 1834 | Candalh-Touta et al.,  | 2017 | International j of computer assisted radiology and surgery. 2017; 12(1):132-133                                       | non pertinent |
| 1835 | Campbell et al.,       | 2017 | Pain Physician. 2017; 20(1):E183-E193                                                                                 | non pertinent |
| 1836 | Campbell et al.,       | 2017 | World j of gastroenterology. 2017; 23(3):560-562                                                                      | non pertinent |
| 1837 | Cameron et al.,        | 2017 | The lancet. Oncology. 2017; 18(7):929-945                                                                             | non pertinent |
| 1838 | Calvino                | 2017 | Douleurs. 2017; 18(1):3-8                                                                                             | non pertinent |
| 1839 | Caicedo et al.,        | 2017 | International j of surgery case reports. 2017; 33:135-138                                                             | non pertinent |
| 1840 | Cai et al.,            | 2017 | Diabetic medicine. 2017; 34(6):813-820                                                                                | non pertinent |
| 1841 | Caeyenberghs et al.,   | 2017 | American j of neuroradiology. 2017; 38(1):183-191                                                                     | non pertinent |
| 1842 | Cadoni et al.,         | 2017 | Gastrointestinal endoscopy. 2017; 85(1):210-218.e211                                                                  | non pertinent |
| 1843 | R.B.R. c73cm - Ribeiro | 2017 | Registro Brasileiro de Ensaio s Clínicos. 2017                                                                        | non pertinent |
| 1844 | Brolese et al.,        | 2017 | Surgical endoscopy and other interventional techniques. 2017; 31(2):503-                                              | non pertinent |
| 1845 | Brock et al.,          | 2017 | Trials. 2017; 18(1)                                                                                                   | non pertinent |
| 1846 | Briolo et al.,         | 2017 | Expert review of hematology. 2017; 10(3):193-205                                                                      | non pertinent |
| 1847 | Braun et al.,          | 2017 | Annals of the rheumatic diseases. 2017; 76(6):1070-1077                                                               | non pertinent |

|      |                     |      |                                                                                                                                         |               |
|------|---------------------|------|-----------------------------------------------------------------------------------------------------------------------------------------|---------------|
| 1848 | Bradley et al.,     | 2017 | Pediatrics. 2017; 139(3)                                                                                                                | non pertinent |
| 1849 | Bouffard et al.,    | 2017 | J Neuroophthalmol. 2017; 37(2):122-125                                                                                                  | non pertinent |
| 1850 | Bottelier et al.,   | 2017 | Psychiatry research. Neuroimaging. 2017; 269:36-42                                                                                      | non pertinent |
| 1851 | Bossi et al.,       | 2017 | Annals of oncology: official j of the european society for medical oncology. 2017; 28(10):2547-2551                                     | non pertinent |
| 1852 | Bosanquet et al.,   | 2017 | Trials. 2017; 18(1)                                                                                                                     | non pertinent |
| 1853 | Borckardt et al.,   | 2017 | Brain stimulation. 2017                                                                                                                 | non pertinent |
| 1854 | Bond et al.,        | 2017 | BMC pregnancy and childbirth. 2017; 17(1)                                                                                               | non pertinent |
| 1855 | Bolm et al.,        | 2017 | J of surgical research. 2017; 212:246-252                                                                                               | non pertinent |
| 1856 | Boland et al.,      | 2017 | Human psychopharmacol ogy. 2017; 32(1)                                                                                                  | non pertinent |
| 1857 | Bogliacino et al.,  | 2017 | Proceedings of the National Academy of Sciences of the United States of America. 2017; 114(32):8505-8510                                | non pertinent |
| 1858 | Boettcher et al.,   | 2017 | Human reproduction. 2017; 32.i257-i258                                                                                                  | non pertinent |
| 1859 | Boateng et al.,     | 2017 | Brain stimulation. 2017; 10(4):e82-e83                                                                                                  | non pertinent |
| 1860 | Blum et al.,        | 2017 | Leukemia. 2017; 31(1):34-39                                                                                                             | non pertinent |
| 1861 | Bloos et al.,       | 2017 | Intensive Care Med. 2017; 43(11):1602-1612                                                                                              | non pertinent |
| 1862 | Blom et al.,        | 2017 | J of clinical lipidology. Conference: 2017 annual scientific sessions of the national lipid association. United states. 2017; 11(3):816 | non pertinent |
| 1863 | Bloembergen et al., | 2017 | Osteoporosis international. 2017; 28:635-636                                                                                            | non pertinent |



|      |                         |      |                                                                                                                                                               |               |
|------|-------------------------|------|---------------------------------------------------------------------------------------------------------------------------------------------------------------|---------------|
| 1864 | Bissonnette et al,      | 2017 | J of the American Academy of Dermatology. 2017; 76(1):33-39                                                                                                   | non pertinent |
| 1865 | Birring et al,          | 2017 | The lancet. Respiratory medicine. 2017; 5(10):806-815                                                                                                         | non pertinent |
| 1866 | Birring et al,          | 2017 | BMJ Open. 2017; 7(1):e014112                                                                                                                                  | non pertinent |
| 1867 | Bilimoria et al.,       | 2017 | Jt Comm J Qual Patient Saf. 2017; 43(5):241-250                                                                                                               | non pertinent |
| 1868 | Bierma-Zeinstra et al,  | 2017 | Osteoarthritis and cartilage. 2017; 25:439-440                                                                                                                | non pertinent |
| 1869 | Beyer-Westendorf et al, | 2017 | The lancet. Haematology. 2017; 4(3):e105-e113                                                                                                                 | non pertinent |
| 1870 | Bethlehem et al,        | 2017 | Transl Psychiatry. 2017; 7(4):e1099                                                                                                                           | non pertinent |
| 1871 | Bertsch et al,          | 2017 | Psychoneuroendocrinology. 2017; 83:49-                                                                                                                        | non pertinent |
| 1872 | Bergmann et al,         | 2017 | Spine. 2017                                                                                                                                                   | non pertinent |
| 1873 | Berginström et al,      | 2017 | J of head trauma rehabilitation. 2017; 32(2):E46-E54                                                                                                          | non pertinent |
| 1874 | Berger et al,           | 2017 | Frontiers in immunology. 2017; 8(NOV)                                                                                                                         | non pertinent |
| 1875 | Benson et al,           | 2017 | Oncologist. 2017; 22(3):241-242 and e249-e215                                                                                                                 | non pertinent |
| 1876 | Benedetti et al,        | 2017 | Bone marrow transplantation. Conference: 43rd annual meeting of the european society for blood and marrow transplantation. France. 2017; 52(Supplement 1):393 | non pertinent |
| 1877 | Bendell et al,          | 2017 | British j of cancer. 2017; 116(5):575-583                                                                                                                     | non pertinent |
| 1878 | Bendell et al,          | 2017 | Oncologist. 2017; 22(3):264-271                                                                                                                               | non pertinent |
| 1879 | Bello et al,            | 2017 | Arthritis & rheumatology (hoboken, N.J.). 2017; 69(8):1661-1669                                                                                               | non pertinent |
| 1880 | Beissner et al,         | 2017 | Home healthcare now. 2017; 35(2):105-112                                                                                                                      | non pertinent |
| 1881 | Beissner et al,         | 2017 | Biological psychiatry. 2017 Aug.                                                                                                                              | non pertinent |

|      |                       |      |                                                                                                                                                             |               |
|------|-----------------------|------|-------------------------------------------------------------------------------------------------------------------------------------------------------------|---------------|
| 1882 | Beinholz et al.,      | 2017 | European psychopharmacology. 2017; 27:718-719                                                                                                               | non pertinent |
| 1883 | Beer et al.,          | 2017 | The lancet. Oncology. 2017; 18(11):1532-1542                                                                                                                | non pertinent |
| 1884 | Beaver et al.,        | 2017 | Clinical cancer research. 2017; 23(14):3479-3483                                                                                                            | non pertinent |
| 1885 | Beall et al.,         | 2017 | Pain Physician. 2017; 20(6):521-528                                                                                                                         | non pertinent |
| 1886 | Bauer et al.,         | 2017 | J Nucl Med. 2017; 58(4):678-681                                                                                                                             | non pertinent |
| 1887 | Barnebey et al.,      | 2017 | American j of ophthalmology. 2017; 176:61-69                                                                                                                | non pertinent |
| 1888 | Barker-Davies et al., | 2017 | BMC musculoskeletal disorders. 2017; 18(1):204                                                                                                              | non pertinent |
| 1889 | Barban et al.,        | 2017 | Brain sciences. 2017; 7(2)                                                                                                                                  | non pertinent |
| 1890 | Baraniuk et al.,      | 2017 | Sci Rep. 2017; 7(1):15338                                                                                                                                   | non pertinent |
| 1891 | Banerji et al.,       | 2017 | New England j of medicine. 2017; 376(8):717-728                                                                                                             | non pertinent |
| 1892 | Bally et al.,         | 2017 | BMJ Open. 2017; 7(7)                                                                                                                                        | non pertinent |
| 1893 | Bally et al.,         | 2017 | Peerj. 2017; 2017(5)                                                                                                                                        | non pertinent |
| 1894 | Badran et al.,        | 2017 | Brain stimulation. Conference: 2nd international brain stimulation conference. Spain. Conference start: 20170305. Conference end: 20170308. 2017; 10(2):378 | non pertinent |
| 1895 | Badday et al.,        | 2017 | American j of respiratory and critical care medicine. 2017; 195                                                                                             | non pertinent |
| 1896 | Babakhani et al.,     | 2017 | J Neurosurg Anesthesiol. 2017; 29(3):291-297                                                                                                                | non pertinent |
| 1897 | Azria et al.,         | 2017 | Annals of oncology. 2017; 28(10):2436-2442                                                                                                                  | non pertinent |
| 1898 | Avrillon et al.,      | 2017 | Future oncology. (london, england). 2017; 13(4):321-335                                                                                                     | non pertinent |
| 1899 | Avidan et al.,        | 2017 | Lancet. 2017; 390(10091):267-275                                                                                                                            | non pertinent |
| 1900 | Auyong et al.,        | 2017 | Anesthesia and Analgesia. 2017; 124(3):959-965                                                                                                              | non pertinent |

|      |                        |      |                                                                       |               |
|------|------------------------|------|-----------------------------------------------------------------------|---------------|
| 1901 | Asgari et al.,         | 2017 | J of clinical anesthesia. 2017; 38:13-17                              | non pertinent |
| 1902 | Asgari et al.,         | 2017 | Pain research & management. 2017;1721460                              | non pertinent |
| 1903 | Asgari et al.,         | 2017 | Pain research & management. 2017                                      | non pertinent |
| 1904 | Arnold et al.,         | 2017 | Neurology. 2017; 89(7):710-713                                        | non pertinent |
| 1905 | Armbruster et al.,     | 2017 | Horm Behav. 2017; 94:97-105                                           | non pertinent |
| 1906 | Arima et al.,          | 2017 | Anticancer research. 2017; 37(2):909-914                              | non pertinent |
| 1907 | Arabmotlagh et al.,    | 2017 | J of orthopaedic research. 2017; 35(1):154-159                        | non pertinent |
| 1908 | Antonini et al.,       | 2017 | European neuropsychopharmacology. 2017; 27:1105-1106                  | non pertinent |
| 1909 | Anton et al.,          | 2017 | Alcoholism, clinical and experimental research. 2017; 41(7):1370-1380 | non pertinent |
| 1910 | Andrews et al.,        | 2017 | Crit Care Med. 2017; 45(5):883-890                                    | non pertinent |
| 1911 | Amiri farahani et al., | 2017 | Archives of gynecology and obstetrics. 2017; 296(2):277-283           | non pertinent |
| 1912 | Alohali et al.,        | 2017 | Brain stimulation. 2017; 10(4):e46-e47                                | non pertinent |
| 1913 | Almadori et al.,       | 2017 | Arthritis & rheumatology. 2017; 69                                    | non pertinent |
| 1914 | Aliberti et al.,       | 2017 | Pulmonary pharmacology & therapeutics. 2017; 45:191-201               | non pertinent |
| 1915 | Alhussien et al.,      | 2017 | Brain stimulation. 2017; 10(4):e47-e48                                | non pertinent |
| 1916 | Alders et al.,         | 2017 | Menopause (New York, N.Y.). 2017; 24(12):1453-                        | non pertinent |
| 1917 | Alamdarsaravi et al.,  | 2017 | Psychiatry research. 2017; 255-59-65                                  | non pertinent |
| 1918 | Aitken et al.,         | 2017 | Osteoporosis international. 2017; 28(1):59-                           | non pertinent |
| 1919 | Ahn et al.,            | 2017 | J of pain. 2017; 18(4):87-88                                          | non pertinent |
| 1920 | Aggarwal et al.,       | 2017 | International J of Oral and Maxillofacial Surgery. 2017; 46:223-      | non pertinent |

|      |                     |      |                                                                  |               |
|------|---------------------|------|------------------------------------------------------------------|---------------|
| 1921 | Adelowo et al.,     | 2017 | Female pelvic medicine & reconstructive surgery. 2017; 23(1):1-7 | non pertinent |
| 1922 | Adams et al.,       | 2017 | Neuropsychopharmacology. 2017; 43:295-                           | non pertinent |
| 1923 | Actrn – Hazratwala  | 2017 | Australian New Zealand Clinical Trials Registry. 2017            | non pertinent |
| 1924 | Actrn - Ho          | 2017 | Australian New Zealand Clinical Trials Registry. 2017            | non pertinent |
| 1925 | Actrn - Fitzgibbon  | 2017 | Australian New Zealand Clinical Trials Registry. 2017            | non pertinent |
| 1926 | Actrn – Innes-Wong  | 2017 | Australian New Zealand Clinical Trials Registry. 2017            | non pertinent |
| 1927 | Actrn – Yates       | 2017 | Australian New Zealand Clinical Trials Registry. 2017            | non pertinent |
| 1928 | Actrn – Haines      | 2017 | Australian New Zealand Clinical Trials Registry. 2017            | non pertinent |
| 1929 | Actrn – Armstrong   | 2017 | Australian New Zealand Clinical Trials Registry. 2017            | non pertinent |
| 1930 | Actrn – Lowe        | 2017 | Australian New Zealand Clinical Trials Registry. 2017            | non pertinent |
| 1931 | Actrn –Rickard      | 2017 | Australian New Zealand Clinical Trials Registry. 2017            | non pertinent |
| 1932 | Actrn – Singh       | 2017 | Australian New Zealand Clinical Trials Registry. 2017            | non pertinent |
| 1933 | Actrn – Wahid       | 2017 | Australian New Zealand Clinical Trials Registry. 2017            | non pertinent |
| 1934 | Actrn – Ewais       | 2017 | Australian New Zealand Clinical Trials Registry. 2017            | non pertinent |
| 1935 | Actrn – Khow        | 2017 | Australian New Zealand Clinical Trials Registry. 2017            | non pertinent |
| 1936 | Abdel-Kader et al., | 2017 | Int Urol Nephrol. 2017; 49(1):27-30                              | non pertinent |
| 1937 | Abbas et al.,       | 2017 | Contraception. 2017; 95(3):251-256                               | non pertinent |

|      |                       |      |                                                                                                                                                                                                                |               |
|------|-----------------------|------|----------------------------------------------------------------------------------------------------------------------------------------------------------------------------------------------------------------|---------------|
| 1938 | Aaron et al.,         | 2017 | Clinical j of sport medicine. 2017; 27(3):271-277                                                                                                                                                              | non pertinent |
| 1939 | Ezhov et al.,         | 2017 | Atherosclerosis supplements. 2017; 30(pp187-192)                                                                                                                                                               | non pertinent |
| 1940 | Feng et al.,          | 2017 | Chinese j of tissue engineering research. 2017; 21(35):5630-5635                                                                                                                                               | non pertinent |
| 1941 |                       | 2017 | Supportive care in cancer. Conference: 2017 international MASCC/ISOO Symposium: Supportive Care in Cancer. United States. 2017; 25(2 Supplement 1):236                                                         | non pertinent |
| 1942 | Bhattacharyya et al., | 2017 | Scientific reports. 2017; 7(1):15025- Osteoporosis international. Conference: World Congress on Osteoporosis, Osteoarthritis and Musculoskeletal Diseases, WCO-IOF-ESCEO 2017. Italy; 28(1 Supplement 1):51-52 | non pertinent |
| 1943 | Geusens et al.,       | 2017 | Annals of oncology. Conference: 42nd ESMO Congress, ESMO 2017. Spain; 28(Supplement 5):v121                                                                                                                    | non pertinent |
| 1944 | Zinkovich et al.,     | 2017 | Neuropsychopharmacology. Conference: 56th Annual Meeting of the American College of Neuropsychopharmacology, ACNP 2017. United States; 43(Supplement 1):198                                                    | non pertinent |
| 1945 |                       | 2017 |                                                                                                                                                                                                                | non pertinent |

|      |                 |      |                                                                                                                                                                                                                                     |               |
|------|-----------------|------|-------------------------------------------------------------------------------------------------------------------------------------------------------------------------------------------------------------------------------------|---------------|
| 1946 |                 | 2017 | Neuropsychopharmacology.<br>Conference: 56th Annual Meeting of the American College of Neuropsychopharmacology, ACNP 2017. United States; 43(Supplement 1):347                                                                      | non pertinent |
| 1947 | Soravia et al., | 2017 | Psychoneuroendocrinology.<br>Conference: 47th Annual Meeting of the International Society of Psychoneuroendocrinology Genes and Hormones: Key Factors of Wellbeing Throughout the Life Span. Switzerland. 2017; 83(Supplement 1):41 | non pertinent |
| 1948 | Gaebel et al.,  | 2017 | European archives of psychiatry and clinical neuroscience.<br>Conference: 6th European Conference on Schizophrenia Research: Advancing Research – Promoting Recovery. Germany. 2017; 267(1 Supplement 1):93-94                      | non pertinent |
| 1949 | Klass et al.,   | 2017 | Neurobiology of learning and memory. 2017; 144(pp235-247)                                                                                                                                                                           | non pertinent |
| 1950 | Jeong et al.,   | 2017 | J of orthopaedic surgery (hong kong). 2017; 25(2):2309499017718908)                                                                                                                                                                 | non pertinent |

|      |                   |      |                                                                                                                                                                                                  |               |
|------|-------------------|------|--------------------------------------------------------------------------------------------------------------------------------------------------------------------------------------------------|---------------|
| 1951 | Patrick et al.,   | 2017 | Biological psychiatry. Conference: 72nd Annual Scientific Convention and Meeting of the Society of Biological Psychiatry, SOBP 2017. United States; 81(10 Supplement 1):70                       | non pertinent |
| 1952 | Karsan et al.,    | 2017 | Cephalalgia. Conference: 18th Congress of the International Headache Society, ICH 2017. Canada; 37(1 Supplement 1):28                                                                            | non pertinent |
| 1953 |                   | 2017 | Neuropsychopharmacology. Conference: 56th Annual Meeting of the American College of Neuropsychopharmacology, ACNP 2017. United States. 43(Supplement 1):569                                      | non pertinent |
| 1954 | Gude et al.,      | 2017 | Implementation science. 2017; 12(1):68<br>Osteoarthritis and cartilage. Conference: 2017 Osteoarthritis Research Society International, OARSI World Congress. United States; 25(Supplement 1):15 | non pertinent |
| 1955 | Bandak et al.,    | 2017 |                                                                                                                                                                                                  | non pertinent |
| 1956 | Zunhammer et al., | 2016 | Sci Rep. 2016; 6:31606                                                                                                                                                                           | non pertinent |
| 1957 | Zielinski et al., | 2016 | The j of trauma and acute care surgery. 2016; 80(2):237-242                                                                                                                                      | non pertinent |
| 1958 | Ziauddeen et al., | 2016 | Neuropsychopharmacology. 2016; 41(11):2647-2657                                                                                                                                                  | non pertinent |
| 1959 | Zhou et al.,      | 2016 | Orthopaedic surgery. 2016; 8(1):44-50                                                                                                                                                            | non pertinent |
| 1960 | Zheng et al.,     | 2016 | Medicine (united states). 2016; 95(24)                                                                                                                                                           | non pertinent |
| 1961 | Zhao et al.,      | 2016 | Anti-cancer drugs. 2016; 27(7):689-694                                                                                                                                                           | non pertinent |

|      |                    |      |                                                                                                  |               |
|------|--------------------|------|--------------------------------------------------------------------------------------------------|---------------|
| 1962 | Zhang et al.,      | 2016 | Biomedical research (india). 2016; 27(2):401-405                                                 | non pertinent |
| 1963 | Zhai et al.,       | 2016 | BMC anesthesiology. 2016; 16(1):80                                                               | non pertinent |
| 1964 | Zhai et al.,       | 2016 | National medical j of china. 2016; 96(28):2229-2233                                              | non pertinent |
| 1965 | Zeidan et al.,     | 2016 | J of neuroscience. 2016; 36(11):3391-3397                                                        | non pertinent |
| 1966 | Zecca et al.,      | 2016 | J of pain and symptom management. 2016; 52(6):783-794.e786                                       | non pertinent |
| 1967 | Zdenkowski et al., | 2016 | Annals of oncology: official j of the european society for medical oncology. 2016; 27(5):806-812 | non pertinent |
| 1968 | Yuksel et al.,     | 2016 | Annals of the rheumatic diseases. 2016; 75:1307-                                                 | non pertinent |
| 1969 | Yuan et al.,       | 2016 | Cancer prevention research (philadelphia, pa.). 2016; 9(5):396-405                               | non pertinent |
| 1970 | Yu et al.,         | 2016 | Medical science monitor. 2016; 22:1687-1693                                                      | non pertinent |
| 1971 | Yovell et al.,     | 2016 | American j of psychiatry. 2016; 173(5):491-498                                                   | non pertinent |
| 1972 | Youssef et al.,    | 2016 | Obesity surgery. 2016; 26(3):494-504                                                             | non pertinent |
| 1973 | Younes et al.,     | 2016 | Lancet oncology. 2016; 17(9):1283-1294                                                           | non pertinent |
| 1974 | Yoshino et al.,    | 2016 | Cancer science. 2016; 107(5):659-665                                                             | non pertinent |
| 1975 | Yoon et al.,       | 2016 | Gut and liver. 2016; 10(4):520-525                                                               | non pertinent |
| 1976 | Yokomizo et al.,   | 2016 | J of urology. 2016; 195(1):41-46                                                                 | non pertinent |
| 1977 | Yin et al.,        | 2016 | Medicine (united states). 2016; 95(12)                                                           | non pertinent |
| 1978 | Yeka et al.,       | 2016 | J of infectious diseases. 2016; 213(7):1134-1142                                                 | non pertinent |
| 1979 | Ydemann et al.,    | 2016 | Danish medical j. 2016; 63(6):1-5                                                                | non pertinent |



|      |                   |      |                                                                                                                            |               |
|------|-------------------|------|----------------------------------------------------------------------------------------------------------------------------|---------------|
| 1980 | Yayehd et al.,    | 2016 | Arch Cardiovasc Dis. 2016; 109(1):412                                                                                      | non pertinent |
| 1981 | Yasuda et al.,    | 2016 | J of diabetes investigation. 2016; 7(1):100-108                                                                            | non pertinent |
| 1982 | Yao et al.,       | 2016 | J of clinical anesthesia. 2016; 31:13-18                                                                                   | non pertinent |
| 1983 | Yao et al.,       | 2016 | Neuroimage. 2016; 130:230-240                                                                                              | non pertinent |
| 1984 | Yao et al.,       | 2016 | Medicine (united states). 2016; 95(26)                                                                                     | non pertinent |
| 1985 | Yan et al.,       | 2016 | PLoS One. 2016; 11(12)                                                                                                     | non pertinent |
| 1986 | Yan et al.,       | 2016 | BMC musculoskeletal disorders. 2016; 17(1)                                                                                 | non pertinent |
| 1987 | Yamaguchi et al., | 2016 | Medical mycology j. 2016; 57(4):E93-E110                                                                                   | non pertinent |
| 1988 | Xu et al.,        | 2016 | Nutrition j. 2016; 15:9                                                                                                    | non pertinent |
| 1989 | Xiao et al.,      | 2016 | Chin J Integr Med. 2016; 22(11):846-854                                                                                    | non pertinent |
| 1990 | Wudneh et al.,    | 2016 | Therapeutics and clinical risk management. 2016; 12:1293-1300                                                              | non pertinent |
| 1991 | Wu et al.,        | 2016 | International j of clinical pharmacology and therapeutics. 2016; 54(12):935-949                                            | non pertinent |
| 1992 | Wu et al.,        | 2016 | Prostaglandins & other lipid mediators. 2016; 126:24-28                                                                    | non pertinent |
| 1993 | Wood et al.,      | 2016 | Spine j. conference: 31st Annual Meeting of the North American Spine Society. United States. 2016; 16(10 Supplement 1):142 | non pertinent |
| 1994 | Winther et al.,   | 2016 | PLoS One. 2016; 11(6)                                                                                                      | non pertinent |
| 1995 | Wilson et al.,    | 2016 | Trials. 2016; 17(1)                                                                                                        | non pertinent |
| 1996 | Willick et al.,   | 2016 | J of nuclear medicine. 2016; 57                                                                                            | non pertinent |
| 1997 | Williams          | 2016 | Neuropsychopharmacology. 2016; 41:75                                                                                       | non pertinent |

|      |                      |      |                                                                                                                                                    |               |
|------|----------------------|------|----------------------------------------------------------------------------------------------------------------------------------------------------|---------------|
| 1998 | Wijayasinghe et al., | 2016 | British j of anaesthesia. 2016; 116(6):829-837                                                                                                     | non pertinent |
| 1999 | Wermke et al.,       | 2016 | British j of haematology. 2016; 175(5):917-924                                                                                                     | non pertinent |
| 2000 | Webster et al.,      | 2016 | Pain medicine (Malden, Mass.). 2016; 17(6):1112-1130                                                                                               | non pertinent |
| 2001 | Webb et al.,         | 2016 | European j of clinical pharmacology. 2016; 72(4):447-457                                                                                           | non pertinent |
| 2002 | Waterschoot et al.,  | 2016 | European urology, supplements. Conference: 8th meeting of the EAU section of genito-urinary reconstructive surgeons. ESGURS 2016. Spain; 15(8):377 | non pertinent |
| 2003 | Ware et al.,         | 2016 | Lancet. 2016; 387(10019):661-670                                                                                                                   | non pertinent |
| 2004 | Wanigasekera et al., | 2016 | Anesthesiology. 2016; 124(1):159-168                                                                                                               | non pertinent |
| 2005 | Wang et al.,         | 2016 | Magn Reson Imaging. 2016; 34(5):609-616                                                                                                            | non pertinent |
| 2006 | Wang et al.,         | 2016 | Osteoarthritis and cartilage. 2016; 24:327-                                                                                                        | non pertinent |
| 2007 | Wang et al.,         | 2016 | J of the pediatric infectious diseases society. 2016; 5(2):170-179                                                                                 | non pertinent |
| 2008 | Wang et al.,         | 2016 | Oncotarget. 2016; 7(14):18705-18712                                                                                                                | non pertinent |
| 2009 | Walter et al.,       | 2016 | Neuropsychopharmacology. 2016; 41(6):1659-1669                                                                                                     | non pertinent |
| 2010 | Walsh et al.,        | 2016 | BMJ Open. 2016; 6(3):e010148                                                                                                                       | non pertinent |
| 2011 | Walsh et al.,        | 2016 | The lancet. Respiratory medicine. 2016; 4(10):807-817                                                                                              | non pertinent |
| 2012 | Wald et al.,         | 2016 | Jama. 2016; 316(23):2495-2503                                                                                                                      | non pertinent |
| 2013 | Waelinitz et al.,    | 2016 | J of obstetrics and gynaecology. 2016; 36(1):106-113                                                                                               | non pertinent |
| 2014 | Wade et al.,         | 2016 | BMJ Open. 2016; 6(1):e008166                                                                                                                       | non pertinent |

|      |                        |      |                                                                                                 |               |
|------|------------------------|------|-------------------------------------------------------------------------------------------------|---------------|
| 2015 | Volz et al.,           | 2016 | Pain. 2016;<br>157(2):429-437                                                                   | non pertinent |
| 2016 | Vinik et al.,          | 2016 | BMC neurology.<br>2016; 16(1)                                                                   | non pertinent |
| 2017 | Vinik et al.,          | 2016 | Target oncology.<br>2016; 11(6):815-824                                                         | non pertinent |
| 2018 | Vidal et al.,          | 2016 | J of pain and symptom<br>management.<br>2016; 52(4):570-574.e579                                | non pertinent |
| 2019 | Vey et al.,            | 2016 | Oncotarget. 2016;<br>7(22):32532-32542                                                          | non pertinent |
| 2020 | Veselis et al.,        | 2016 | Sleep Med. 2016;<br>27-28:115-120                                                               | non pertinent |
| 2021 | Verstovsek et al.,     | 2016 | J of hematology &<br>oncology. 2016;<br>9(1)                                                    | non pertinent |
| 2022 | Vermersch et al.,      | 2016 | European<br>neurology. 2016;<br>76(5-6):216-226                                                 | non pertinent |
| 2023 | Vercruyssen et al.,    | 2016 | Clin Oral Implants<br>Res. 2016;<br>27(4):427-432                                               | non pertinent |
| 2024 | Velipasaoglu et al.,   | 2016 | J of maternal-fetal<br>& neonatal<br>medicine. 2016;<br>29(23):3838-3842                        | non pertinent |
| 2025 | Vecchio et al.,        | 2016 | Neuroscience<br>letters. 2016;<br>626:149-157                                                   | non pertinent |
| 2026 | Vaseghi et al.,        | 2016 | European j of<br>neuroscience.<br>2016; 43(9):1161-1172                                         | non pertinent |
| 2027 | Van Rooij et al.,      | 2016 | Neuropsychophar<br>macology. 2016;<br>41:295-                                                   | non pertinent |
| 2028 | Van Lunzen et al.,     | 2016 | AIDS (london,<br>england). 2016;<br>30(2):251-259                                               | non pertinent |
| 2029 | Van Hoorn et al.,      | 2016 | European j of<br>obstetrics,<br>gynecology and<br>reproductive<br>biology. 2016;<br>197:168-173 | non pertinent |
| 2030 | Van Cutsem et al.,     | 2016 | Targeted<br>oncology. 2016;<br>11(3):383-400                                                    | non pertinent |
| 2031 | Van Broekhoven et al., | 2016 | BMC Cancer.<br>2016; 16:686                                                                     | non pertinent |
| 2032 | Vacas et al.,          | 2016 | Anesthesia and<br>Analgesia. 2016;<br>123(1):206-212                                            | non pertinent |
| 2033 | Ursing et al.,         | 2016 | PLoS One. 2016;<br>11(9)                                                                        | non pertinent |
| 2034 | Urquhart et al.,       | 2016 | Trials. 2016;<br>17(1):514                                                                      | non pertinent |
| 2035 | Urbanska et al.,       | 2016 | Pediatric<br>infectious disease<br>j. 2016; 35(2):142-145                                       | non pertinent |

|      |                    |      |                                                                       |               |
|------|--------------------|------|-----------------------------------------------------------------------|---------------|
| 2036 | Ugwu et al.,       | 2016 | International j of gynaecology and obstetrics. 2016; 133(2):173-177   | non pertinent |
| 2037 | Ueno et al.,       | 2016 | International j of molecular sciences. 2016; 17(6)                    | non pertinent |
| 2038 | Udristoiu et al.,  | 2016 | J of affective disorders. 2016; 199:6-12                              | non pertinent |
| 2039 | Uchida et al.,     | 2016 | Blood. 2016; 127(13):1633-1641                                        | non pertinent |
| 2040 | Tsukada et al.,    | 2016 | The bone & joint j. 2016; 98-B(2):194-200                             | non pertinent |
| 2041 | Tsuchiya et al.,   | 2016 | International j of clinical oncology. 2016; 21(6):1085-1090           | non pertinent |
| 2042 | Tsianakas et al.,  | 2016 | Experimental dermatology. 2016; 25(6):428-433                         | non pertinent |
| 2043 | Tryfonidis et al., | 2016 | European j of cancer (Oxford, England : 1990). 2016; 53:144-154       | non pertinent |
| 2044 | Truong et al.,     | 2016 | J of the american heart association. 2016; 5(3):e003137               | non pertinent |
| 2045 | Trneny et al.,     | 2016 | The lancet. Oncology. 2016; 17(3):319-331                             | non pertinent |
| 2046 | Torres et al.,     | 2016 | Clinical j of the American Society of Nephrology. 2016; 11(5):803-811 | non pertinent |
| 2047 | Tongpeth et al.,   | 2016 | Circulation. 2016; 134                                                | non pertinent |
| 2048 | Thybo et al.,      | 2016 | BMC anesthesiology. 2016; 16:21                                       | non pertinent |
| 2049 | Thomas et al.,     | 2016 | Oral radiology. 2016; 32(3):160-166                                   | non pertinent |
| 2050 | Thirumalai et al., | 2016 | J of clinical endocrinology and metabolism. 2016; 101(7):2937-2944    | non pertinent |
| 2051 | Thera et al.,      | 2016 | Malaria j. 2016; 15(1)                                                | non pertinent |
| 2052 | Tetreault et al.,  | 2016 | PLoS Biol. 2016; 14(10):e1002570                                      | non pertinent |
| 2053 | Tepes et al.,      | 2016 | European j of gastroenterology & hepatology. 2016; 28(6):676-683      | non pertinent |

|      |                     |      |                                                                                                                                                                                                  |               |
|------|---------------------|------|--------------------------------------------------------------------------------------------------------------------------------------------------------------------------------------------------|---------------|
| 2054 | Ten Hove et al.,    | 2016 | J of neuro-ophthalmology. 2016; 36(1):13-19                                                                                                                                                      | non pertinent |
| 2055 | Telles et al.,      | 2016 | Med Sci Monit. 2016; 22:3228-3247                                                                                                                                                                | non pertinent |
| 2056 | Telen et al.,       | 2016 | Vox sanguinis. Conference: 34th international congress of the international society of blood transfusion. United arab emirates. Conference start:20160903. Conference end:20160908. 2016; 111:64 | non pertinent |
| 2057 | Tarrago Mda et al., | 2016 | Medicine (Baltimore). 2016; 95(17):e3353                                                                                                                                                         | non pertinent |
| 2058 | Tang et al.,        | 2016 | J of orthopaedic surgery (hong kong). 2016; 24(2):183-187                                                                                                                                        | non pertinent |
| 2059 | Tang et al.,        | 2016 | Lancet oncology. 2016; 17(12):1720-1731                                                                                                                                                          | non pertinent |
| 2060 | Tandon et al.,      | 2016 | J of psychopharmacology (Oxford, England). 2016; 30(1):69-77                                                                                                                                     | non pertinent |
| 2061 | Tanaka et al.,      | 2016 | Molecular medicine (Cambridge, Mass.). 2016; 22:338-348                                                                                                                                          | non pertinent |
| 2062 | Tan et al.,         | 2016 | Clinical and experimental pharmacology & physiology. 2016; 43(3):304-311                                                                                                                         | non pertinent |
| 2063 | Tan et al.,         | 2016 | Mediators of inflammation. 2016; 2016:4173962                                                                                                                                                    | non pertinent |
| 2064 | Talan et al.,       | 2016 | Annals of emergency medicine. 2016 Jul                                                                                                                                                           | non pertinent |
| 2065 | Takemaru et al.,    | 2016 | J of plastic, reconstructive & aesthetic surgery. 2016; 69(4):493-496                                                                                                                            | non pertinent |

|      |                    |      |                                                                                                                                                                                                                                   |               |
|------|--------------------|------|-----------------------------------------------------------------------------------------------------------------------------------------------------------------------------------------------------------------------------------|---------------|
|      |                    |      | FASEB j.<br>conference:<br>experimental<br>biology 2016, EB<br>San diego, CA<br>united states.                                                                                                                                    |               |
| 2066 | Takahashi et al.,  | 2016 | Conference<br>start:20160402.<br>Conference<br>end:20160406.<br>Conference<br>publication:<br>(var.pagings); 30<br>Neurogastroenter<br>ology and<br>motility. 2016;<br>28(4):487-497                                              | non pertinent |
| 2067 | Tack et al.,       | 2016 | European surgery<br>– acta chirurgica<br>austriaca.<br>Conference: 29th<br>european<br>federation<br>congress of the<br>international<br>college of<br>surgeons, ICS<br>2015. Czech<br>republic; 48(3<br>Supplement<br>1):194-196 | non pertinent |
| 2068 | Svaton et al.,     | 2016 | Asian<br>biomedicine.<br>2016; 10(5):435-<br>445                                                                                                                                                                                  | non pertinent |
| 2069 | Suttiruksa et al., | 2016 | Menopause (New<br>York N.Y.). 2016;<br>23(7):740-748                                                                                                                                                                              | non pertinent |
| 2070 | Sun et al.,        | 2016 | Clinical<br>therapeutics.<br>2016; 38(1):31-38                                                                                                                                                                                    | non pertinent |
| 2071 | Sun et al.,        | 2016 | J of the european<br>academy of<br>dermatology and<br>verenology:<br>JEADV. 2016; 30<br>Suppl 1:9-17                                                                                                                              | non pertinent |
| 2072 | Sulzberger et al., | 2016 | American j of<br>gastroenterology.<br>2016; 111:906-907                                                                                                                                                                           | non pertinent |
| 2073 | Sultana et al.,    | 2016 | J of child and<br>adolescent<br>psychopharmacol<br>ogy. 2016;<br>26(4):362-371                                                                                                                                                    | non pertinent |
| 2074 | Su et al.,         | 2016 | Br J Anaesth.<br>2016; 116(3):405-<br>412                                                                                                                                                                                         | non pertinent |
| 2075 | Stundner et al.,   | 2016 | Reproductive<br>biology and<br>endocrinology.<br>2016; 14(1)                                                                                                                                                                      | non pertinent |
| 2076 | Strowitzki et al., | 2016 |                                                                                                                                                                                                                                   |               |

|      |                           |      |                                                                                                                                                                                    |               |
|------|---------------------------|------|------------------------------------------------------------------------------------------------------------------------------------------------------------------------------------|---------------|
| 2077 | Stoustrup et al.,         | 2016 | J of rheumatology. Conference: 71st annual meeting of the canadian rheumatology association. CRA 2016, Canada. Conference start:20160217. Conference end:20160220; 43(6):1209-1210 | non pertinent |
| 2078 | Storme et al.,            | 2016 | Gynecological surgery. 2016; 13(3):139-146                                                                                                                                         | non pertinent |
| 2079 | Stinson, Conelly et al.,  | 2016 | Pediatric rheumatology. 2016; 14                                                                                                                                                   | non pertinent |
| 2080 | Stinson, Gatsonis et al., | 2016 | Pediatric rheumatology. 2016; 14                                                                                                                                                   | non pertinent |
| 2081 | Stillman et al.,          | 2016 | Am Heart J. 2016; 179:19-28                                                                                                                                                        | non pertinent |
| 2082 | Steiner et al.,           | 2016 | BMC complementary and alternative medicine. 2016; 16(1)                                                                                                                            | non pertinent |
| 2083 | Satrkstein et al.,        | 2016 | J of stroke and cerebrovascular diseases. 2016; 25(5):1119-1127                                                                                                                    | non pertinent |
| 2084 | Srivastava et al.,        | 2016 | J of clinical and diagnostic research. 2016; 10(9):UC01-UC04                                                                                                                       | non pertinent |
| 2085 | Spiridigliozzi et al.,    | 2016 | American j of medical genetics. Part a. 2016; 170(6):1545-1555                                                                                                                     | non pertinent |
| 2086 | Soriano-Maldonado et al., | 2016 | PLoS One. 2016; 11(2)                                                                                                                                                              | non pertinent |
| 2087 | Sonne et al.,             | 2016 | BMC Psychiatry. 2016; 16(1)                                                                                                                                                        | non pertinent |
| 2088 | Song et al.,              | 2016 | J of digestive diseases. 2016; 17(4):260-267                                                                                                                                       | non pertinent |
| 2089 | Song et al.,              | 2016 | Helicobacter. 2016; 21(5):382-388                                                                                                                                                  | non pertinent |
| 2090 | Song et al.,              | 2016 | International orthopaedics. 2016; 40(2):295-299                                                                                                                                    | non pertinent |
| 2091 | Song et al.,              | 2016 | J of acquired immune deficiency syndromes. 2016; 72(4):400-407                                                                                                                     | non pertinent |
| 2092 | Sohoni et al.,            | 2016 | American j of emergency and medicine. 2016; 34(4):730-734                                                                                                                          | non pertinent |

|      |                         |      |                                                                                                   |               |
|------|-------------------------|------|---------------------------------------------------------------------------------------------------|---------------|
| 2093 | Sobell et al.,          | 2016 | Acta dermato-<br>venerologica.<br>2016; 96(4):514-<br>520                                         | non pertinent |
| 2094 | Smallwood et al.,       | 2016 | Psychiatry Res<br>Neuroimaging.<br>2016; 250:12-14                                                | non pertinent |
| 2095 | R.B.R. sjz -            | 2016 |                                                                                                   | non pertinent |
| 2096 | Sivalingam et al.,      | 2016 | J of urology. 2016;<br>195(2):385-390                                                             | non pertinent |
| 2097 | Sinke et al.,           | 2016 | Cortex: a j<br>devoted to the<br>study of the<br>nervous system<br>and behavior.<br>2016; 78:1-14 | non pertinent |
| 2098 | Simpson et al.,         | 2016 | Diabetes care.<br>2016; 39(9):1493-<br>1500                                                       | non pertinent |
| 2099 | Simonelli et al.,       | 2016 | Annals of<br>oncology. 2016;<br>27(9):1782-1787                                                   | non pertinent |
| 2100 | Sidhu et al.,           | 2016 | Liver<br>international.<br>2016; 36(3):378-<br>385                                                | non pertinent |
| 2101 | Shukla et al.,          | 2016 | International j of<br>research in<br>ayuverda and<br>pharmacy. 2016;<br>7(2):8-11                 | non pertinent |
| 2102 | Shoushtarian et<br>al., | 2016 | J Clin Monit<br>Comput. 2016;<br>30(6):833-844                                                    | non pertinent |
| 2103 | Shinozaki et al.,       | 2016 | J Dent Res. 2016;<br>95(10):1138-1146                                                             | non pertinent |
| 2104 | Shimonovich et<br>al.,  | 2016 | BMC emergency<br>medicine. 2016;<br>16(1):43                                                      | non pertinent |
| 2105 | Sheldon et al.,         | 2016 | Vaccine. 2016;<br>34(18):2082-2091                                                                | non pertinent |
| 2106 | Shayan et al.,          | 2016 | J of clinical and<br>diagnostic<br>research. 2016;<br>10(12):QC13-<br>QC16                        | non pertinent |
| 2107 | Shavandi et al.,        | 2016 | J of sports<br>medicine and<br>physical fitness.<br>2016; 56(9):990-<br>996                       | non pertinent |
| 2108 | Sharon et al.,          | 2016 | Am J Med. 2016;<br>129(7):755-758                                                                 | non pertinent |
| 2109 | Sharma et al.,          | 2016 | BMC<br>musculoskeletal<br>disorders. 2016;<br>17(1)                                               | non pertinent |



|      |                  |      |                                                                                                                                                                                                                                                                                                                            |               |
|------|------------------|------|----------------------------------------------------------------------------------------------------------------------------------------------------------------------------------------------------------------------------------------------------------------------------------------------------------------------------|---------------|
|      |                  |      | Blood.<br>Conference: 58th<br>annual meeting of<br>the american<br>society of<br>hematology, ASH<br>2016. United<br>states. Conference<br>start:20161203.<br>Conference<br>end:20161206;<br>128(22)                                                                                                                        | non pertinent |
| 2110 | Shalabi et al.,  | 2016 |                                                                                                                                                                                                                                                                                                                            |               |
| 2111 | Shah et al.,     | 2016 | J of rheumatology.<br>2016; 43(9):1665-<br>1671                                                                                                                                                                                                                                                                            | non pertinent |
|      |                  |      | Alcoholism.<br>Clinical and<br>experimental<br>research.<br>Conference: 39th<br>annual scientific<br>meeting of the<br>research society<br>on alcoholism.<br>New orleans, LA<br>united states.<br>Conference start:<br>20160625.<br>Conference<br>end:20160629.<br>Conference<br>publication:<br>(var.pagings).<br>40:217A |               |
| 2112 | Shah et al.,     | 2016 |                                                                                                                                                                                                                                                                                                                            | non pertinent |
| 2113 | Serrano et al.,  | 2016 | European j of<br>anaesthesiology.<br>2016; 33(6):436-<br>443                                                                                                                                                                                                                                                               | non pertinent |
| 2114 | Sermeus et al.,  | 2016 | J canadien<br>d'anesthesie<br>(Canadian j of<br>anaesthesia).<br>2016; 63(1):46-55<br>Foot & ankle<br>international /<br>American<br>Orthopaedic Foot<br>and Ankle Society<br>(and) Swiss Foot<br>and Ankle Society.<br>2016; 37(9):989-<br>993                                                                            | non pertinent |
| 2115 | Serinken et al., | 2016 |                                                                                                                                                                                                                                                                                                                            | non pertinent |
| 2116 | Segelov et al.,  | 2016 | J of clinical<br>oncology. 2016;<br>34(19):2258-2264<br>J of rehabilitation<br>research and<br>development.<br>2016; 53(6):945-<br>958                                                                                                                                                                                     | non pertinent |
| 2117 | Schwenk et al.,  | 2016 |                                                                                                                                                                                                                                                                                                                            | non pertinent |
| 2118 | Schwenk et al.,  | 2016 | Gerontology.<br>2016; 62(5):553-<br>563                                                                                                                                                                                                                                                                                    | non pertinent |

|      |                      |      |                                                                                                                                                                                                                                                                       |               |
|------|----------------------|------|-----------------------------------------------------------------------------------------------------------------------------------------------------------------------------------------------------------------------------------------------------------------------|---------------|
| 2119 | Schweden et al.,     | 2016 | J Anxiety Disord.<br>2016; 43:99-105<br>Alcoholism:<br>clinical and<br>experimental<br>research.<br>Conference: 39th<br>annual scientific<br>meeting of the<br>research society<br>on alcoholism.                                                                     | non pertinent |
| 2120 | Schwandt et al.,     | 2016 | New orleans. LA<br>united states.<br>Conference start:<br>20160625.<br>Conference end:<br>20160629.<br>Conference<br>publication:<br>(var.pagings).<br>2016; 40:165A<br>AIDS (london,<br>england). 2016;                                                              | non pertinent |
| 2121 | Schürmann et al.,    | 2016 | 30(1):57-63<br>BMC                                                                                                                                                                                                                                                    | non pertinent |
| 2122 | Schrubbe et al.,     | 2016 | musculoskeletal<br>disorders. 2016;<br>17(1):359                                                                                                                                                                                                                      | non pertinent |
| 2123 | Schröder et al.,     | 2016 | Neurourology and<br>urodynamics.<br>2016; 35(5):582-<br>588                                                                                                                                                                                                           | non pertinent |
| 2124 | Schrag et al.,       | 2016 | Obstetrics and<br>gynecology. 2016;<br>127(2):199-201                                                                                                                                                                                                                 | non pertinent |
| 2125 | Schöffski et al.,    | 2016 | Lancet (london,<br>england). 2016;<br>387(10028):1629-<br>1637                                                                                                                                                                                                        | non pertinent |
| 2126 | Schmidt et al.,      | 2016 | Alimentary<br>pharmacology &<br>therapeutics.<br>2016; 44(3):259-<br>270                                                                                                                                                                                              | non pertinent |
| 2127 | Schloesser et al.,   | 2016 | Neuropsychophar<br>macology. 2016;<br>41:555-556<br>J of Pain.<br>Conference: 35th<br>Annual Scientific<br>Meeting of the<br>American Pain<br>Society. Autin, TX<br>United States.<br>Conference<br>Publication:(var.p<br>agings). 2016 Apr;<br>17:(4 SUPPL.<br>1):78 | non pertinent |
| 2128 | Schliessbach et al., | 2016 | Arthritis research<br>& therapy. 2016;<br>18(1):131                                                                                                                                                                                                                   | non pertinent |
| 2129 | Schiopu et al.,      | 2016 | Clin J Sport Med.<br>2016; 26(3):199-<br>205                                                                                                                                                                                                                          | non pertinent |
| 2130 | Schinhan et al.,     | 2016 |                                                                                                                                                                                                                                                                       | non pertinent |

|      |                     |      |                                                                                                                                                          |               |
|------|---------------------|------|----------------------------------------------------------------------------------------------------------------------------------------------------------|---------------|
| 2131 | Schaible et al.,    | 2016 | Movement disorders. 2016; 31:410-                                                                                                                        | non pertinent |
| 2132 | Schadendorf et al., | 2016 | Melanoma research Conference: 16th World Congress on Cancers of the Skin 2016. Austria. Conference start: 20160831. Conference end: 20160903; 26:e43-e44 | non pertinent |
| 2133 | Sbidian et al.,     | 2016 | J of investigative dermatology. 2016; 136(6):1124-1129                                                                                                   | non pertinent |
| 2134 | Saw et al.,         | 2016 | BMC Musculoskeletal Disord. 2016; 17:236                                                                                                                 | non pertinent |
| 2135 | Sarig Bahat et al., | 2016 | Manual therapy. 2016; 25:e35-                                                                                                                            | non pertinent |
| 2136 | Santos et al.,      | 2016 | J of acquired immune deficiency syndromes (1999). 2016; 72(1):21-30                                                                                      | non pertinent |
| 2137 | Samadani            | 2016 | J of neurotrauma. 2016; 33:A4-                                                                                                                           | non pertinent |
| 2138 | Salem et al.,       | 2016 | Gastroenterology. 2016; 151(6):1155-1563.e1152                                                                                                           | non pertinent |
| 2139 | Saad et al.,        | 2016 | Lancet oncology. 2016; 17(9):1306-1316                                                                                                                   | non pertinent |
| 2140 | Ryu et al.,         | 2016 | Eur Spine J. 2016; 25(12):4067-4079                                                                                                                      | non pertinent |
| 2141 | Ruwe et al.,        | 2016 | J of clinical psychopharmacology. 2016; 36(5):457-464                                                                                                    | non pertinent |
| 2142 | Ruperto et al.,     | 2016 | Lancet (london, england). 2016; 387(10019):671-678                                                                                                       | non pertinent |
| 2143 | Runge et al.,       | 2016 | Regional anesthesia and pain medicine. 2016; 41(4):445-451                                                                                               | non pertinent |
| 2144 | Rummel et al.,      | 2016 | The lancet. Oncology. 2016; 17(1):57-66                                                                                                                  | non pertinent |
| 2145 | Roy et al.,         | 2016 | British j of radiology. 2016; 89(1062):2015096                                                                                                           | non pertinent |

|      |                   |      |                                                                                                                                                                                           |               |
|------|-------------------|------|-------------------------------------------------------------------------------------------------------------------------------------------------------------------------------------------|---------------|
| 2146 | Rotter et al.,    | 2016 | European spine j. conference: 11th german spine conference – annual meeting of the german spine society. Germany. Conference start: 20161201. Confernece end: 20161203. 2016; 25(11):3815 | non pertinent |
| 2147 | Rossano et al.,   | 2016 | Trials. 2016; 17(1):523                                                                                                                                                                   | non pertinent |
| 2148 | Ross et al.,      | 2016 | J of orthopaedic research. 2016; 34                                                                                                                                                       | non pertinent |
| 2149 | Rosenfeld et al., | 2016 | Anaesthesia. 2016; 71(4):380-388                                                                                                                                                          | non pertinent |
| 2150 | Rogol et al.,     | 2016 | Andrology. 2016; 4(1):46-54                                                                                                                                                               | non pertinent |
| 2151 | Robleda et al.,   | 2016 | Intensive care medicine. 2016; 42(2):183-191                                                                                                                                              | non pertinent |
| 2152 | Robertson et al., | 2016 | Lancet (london, england). 2016; 388(10063):2997-3005                                                                                                                                      | non pertinent |
| 2153 | Robbins et al.,   | 2016 | Neurology. 2016; 87(24):2522-2526                                                                                                                                                         | non pertinent |
| 2154 | Rini et al.,      | 2016 | Lancet oncology. 2016; 17(11):1599-1611                                                                                                                                                   | non pertinent |
| 2155 | Riel et al.,      | 2016 | BMC musculoskeletal disorders. 2016; 17(1)                                                                                                                                                | non pertinent |
| 2156 | Ricotti et al.,   | 2016 | PLoS One. 2016; 11(4)                                                                                                                                                                     | non pertinent |
| 2157 | Richeldi et al.,  | 2016 | Respiratory medicine. 2016; 113:74-79                                                                                                                                                     | non pertinent |
| 2158 | Richards et al.,  | 2016 | Osteoarthritis and cartilage. 2016; 24:470-                                                                                                                                               | non pertinent |
| 2159 | Rheims et al.,    | 2016 | Trials. 2016; 17(1):529                                                                                                                                                                   | non pertinent |
| 2160 | Reisman et al.,   | 2016 | Chest. Conference: CHEST 2016. United states. Conference start: 20161022. Conference end: 20161026. 2016; 150(4 Supplement 1):928A                                                        | non pertinent |
| 2161 | Reilingh et al.,  | 2016 | American j of sports medicine. 2016; 44(5):1292-1300                                                                                                                                      | non pertinent |
| 2162 | Rebbeck et al.,   | 2016 | J of physiotherapy. 2016; 62(2):111                                                                                                                                                       | non pertinent |

|      |                     |      |                                                                 |               |
|------|---------------------|------|-----------------------------------------------------------------|---------------|
| 2163 | Rauck et al.,       | 2016 | Pain practice. 2016; 16:18                                      | non pertinent |
| 2164 | Ratziu et al.,      | 2016 | Gastroenterology. 2016; 150(5):1147-1159e1145                   | non pertinent |
| 2165 | Rashaan et al.,     | 2016 | Trials. 2016; 17(1)                                             | non pertinent |
| 2166 | Rao et al.,         | 2016 | Headache. 2016; 56(2):331-340                                   | non pertinent |
| 2167 | Rampurwala et al.,  | 2016 | Investigational new drugs. 2016; 1-8                            | non pertinent |
| 2168 | Ramvalho et al.,    | 2016 | Lasers in medical science. 2016; 31(9):1899-1905                | non pertinent |
| 2169 | Raje et al.,        | 2016 | Clinical cancer research. 2016; 22(23):5688-5695                | non pertinent |
| 2170 | Rajan et al.,       | 2016 | J Neurosurg Anesthesiol. 2016; 28(4):282-290                    | non pertinent |
| 2171 | Raghavan et al.,    | 2016 | BJOG. 2016; 123(1):120-127                                      | non pertinent |
| 2172 | Raak et al.,        | 2016 | Homeopathy. 2016; 105(1):37-38                                  | non pertinent |
| 2173 | Quoix et al.,       | 2016 | The lancet. Oncology. 2016; 17(2):212-223                       | non pertinent |
| 2174 | Quenardelle et al., | 2016 | Cerebrovasc Dis. 2016; 42(3-4):205-212                          | non pertinent |
| 2175 | Qi et al.,          | 2016 | Biological & pharmaceutical bulletin. 2016; 39(9):1455-1460     | non pertinent |
| 2176 | Putzier et al.,     | 2016 | Spine j. 2016; 16(7):811-819                                    | non pertinent |
| 2177 | Pursnani et al.,    | 2016 | American j of cardiology. 2016; 117(3):319-324                  | non pertinent |
| 2178 | Puiu et al.,        | 2016 | Arthritis & rheumatology (hoboken, N.J.). 2016; 68(6):1511-1521 | non pertinent |
| 2179 | Pricop et al.,      | 2016 | International urology and nephrology. 2016; 48(2):183-189       | non pertinent |
| 2180 | Preller et al.,     | 2016 | Proc Natl Acad Sci U S A. 2016; 113(18):5119-5124               | non pertinent |
| 2181 | Preece et al.,      | 2016 | BMC Musculoskeletal Disord. 2016; 17(1):372                     | non pertinent |
| 2182 | Prawira et al.,     | 2016 | Investigational new drugs. 2016; 34(5):575-583                  | non pertinent |
| 2183 | Prajna et al.,      | 2016 | JAMA ophthalmology. 2016; 134(12):1365-1372                     | non pertinent |

|      |                    |      |                                                                            |               |
|------|--------------------|------|----------------------------------------------------------------------------|---------------|
| 2184 | Powers et al.,     | 2016 | Contemporary clinical trials. 2016; 50:265-272                             | non pertinent |
| 2185 | Portincasa et al., | 2016 | J of gastrointestinal and liver diseases. 2016; 25(2):151-157              | non pertinent |
| 2186 | Popat et al.,      | 2016 | The lancet haematology. 2016; 3(12):e572-e580                              | non pertinent |
| 2187 | Pons et al.,       | 2016 | Annals of physical and rehabilitation medicine. 2016; 59:e162-             | non pertinent |
| 2188 | Pinsornsak et al., | 2016 | BMC musculoskeletal disorders. 2016; 17:313                                | non pertinent |
| 2189 | Pimenta et al.,    | 2016 | Phytotherapy research:PTR. 2016; 30(4):613-617                             | non pertinent |
| 2190 | Piette et al.,     | 2016 | JMIR research protocols. 5(2):e353.2016 apr                                | non pertinent |
| 2191 | Pieper et al.,     | 2016 | J of the American Geriatrics Society. 2016; 64(2):261-269                  | non pertinent |
| 2192 | Pickut et al.,     | 2016 | Movement disorders. 2016; 31:419-                                          | non pertinent |
| 2193 | Pickering et al.,  | 2016 | Drug design, development and therapy. 2016; 10:3969-3976                   | non pertinent |
| 2194 | Pichon et al.,     | 2016 | International j of radiation oncology biology physics. 2016; 96(4):840-847 | non pertinent |
| 2195 | Phan et al.,       | 2016 | J of gastroenterology and hepatology (australia). 2016; 31:59-             | non pertinent |
| 2196 | Phan et al.,       | 2016 | Vaccine. 2016; 34(45):5449-5456                                            | non pertinent |
| 2197 | Petschow et al.,   | 2016 | PLoS One. 2016; 11(10)                                                     | non pertinent |
| 2198 | Pers et al.,       | 2016 | Stem cells translational medicine. 2016; 5(7):847-856                      | non pertinent |
| 2199 | Perry et al.,      | 2016 | Manual therapy. 2016; 25:e88-                                              | non pertinent |
| 2200 | Pérol et al.,      | 2016 | Lung cancer (Amsterdam, Netherlands). 2016; 93:95-103                      | non pertinent |

|      |                      |      |                                                                                                                    |               |
|------|----------------------|------|--------------------------------------------------------------------------------------------------------------------|---------------|
| 2201 | Perez et al.,        | 2016 | Breast cancer research. 2016; 18(1)                                                                                | non pertinent |
| 2202 | Per - Mateo          | 2016 | Clinical trials peruvian registry – CTPR. 2016                                                                     | non pertinent |
| 2203 | Pepin et al.,        | 2016 | Human vaccines & immunotherapeutics. 2016; 12(12):3072-3078                                                        | non pertinent |
| 2204 | Peng et al.,         | 2016 | Clinical therapeutics. 2016; 38(1//8147835 (NSFC) * National Natural Science Foundation of China*):192e192-201e192 | non pertinent |
| 2205 | Pelletier et al.,    | 2016 | Annals of the rheumatic diseases. 2016; 75:836-                                                                    | non pertinent |
| 2206 | Pekyl et al.,        | 2016 | New England j of medicine. 2016; 374(10):913-927                                                                   | non pertinent |
| 2207 | Peker Tekdal et al., | 2016 | Clinical oral implants research. 2016; 27(5):535-544                                                               | non pertinent |
| 2208 | Pedraza et al.,      | 2016 | Int Orthop. 2016; 40(12):2519-2526                                                                                 | non pertinent |
| 2209 | Pazzaglia et al.,    | 2016 | Neuroscience. 2016; 333:244-251                                                                                    | non pertinent |
| 2210 | Pawsey et al.,       | 2016 | Drugs in R&D. 2016; 16(2):181-191                                                                                  | non pertinent |
| 2211 | Pathan et al.,       | 2016 | Lancet (london, england). 2016; 387(10032):1999-2007                                                               | non pertinent |
| 2212 | Parratte et al.,     | 2016 | Clinical orthopaedics and related research. 2016; 474(10):2085-2093                                                | non pertinent |
| 2213 | Park et al.,         | 2016 | The lancet. Oncology. 2016; 17(5):577-589                                                                          | non pertinent |
| 2214 | Park et al.,         | 2016 | Oncotarget. 2016; 7(46):75482-75491                                                                                | non pertinent |
| 2215 | Park et al.,         | 2016 | Uorl J. 2016; 13(4):2759-2764                                                                                      | non pertinent |
| 2216 | Park et al.,         | 2016 | Pain practice. 2016; 16(7):814-819                                                                                 | non pertinent |
| 2217 | Paramarta et al.,    | 2016 | J of translational medicine. 2016; 14(1):308                                                                       | non pertinent |

|      |                            |      |                                                                                                                                                                                                                                                                                                       |               |
|------|----------------------------|------|-------------------------------------------------------------------------------------------------------------------------------------------------------------------------------------------------------------------------------------------------------------------------------------------------------|---------------|
| 2218 | Papa et al.,               | 2016 | J of translational medicine. 2016; 14(1)                                                                                                                                                                                                                                                              | non pertinent |
| 2219 | Panza et al.,              | 2016 | Med Sci Sports Exerc. 2016; 48(1):1-6                                                                                                                                                                                                                                                                 | non pertinent |
| 2220 | Pandharipande et al.,      | 2016 | Radiology. 2016; 281(3):835-846                                                                                                                                                                                                                                                                       | non pertinent |
| 2221 | Paloyelis et al.,          | 2016 | J Neuroendocrinol. 2016; 28(4)                                                                                                                                                                                                                                                                        | non pertinent |
| 2222 | Palm et al.,               | 2016 | Restor Neurol Neurosci. 2016; 34(2):189-199                                                                                                                                                                                                                                                           | non pertinent |
| 2223 | Pagidipati et al.,         | 2016 | J of the American College of Cardiology. 2016; 67(22):2607-2616                                                                                                                                                                                                                                       | non pertinent |
| 2224 | Ostlund-lagerstrom et al., | 2016 | Nutr J. 2016; 15(1):80                                                                                                                                                                                                                                                                                | non pertinent |
| 2225 | Ost                        | 2016 | Radiotherapy and oncology. 2016; 119:292-293                                                                                                                                                                                                                                                          | non pertinent |
| 2226 | Ormarsson et al.,          | 2016 | Acta paediatrica. 2016; 105(6):689-694                                                                                                                                                                                                                                                                | non pertinent |
| 2227 | Orfila et al.,             | 2016 | Stroke.<br>Conference:<br>american heart association/american stroke association 2016 international stroke conference and state-of-the-science stroke nursing symposium los angeles, CA united states. Conference start: 20160216. Conference end:20160219. Conference publication: (var.pagings). 47 | non pertinent |
| 2228 | Orefice et al.,            | 2016 | Neurotherapeutics . 2016; 13(2):428-438                                                                                                                                                                                                                                                               | non pertinent |
| 2229 | Olsen et al.,              | 2016 | J of critical care. 2016; 36:207-211                                                                                                                                                                                                                                                                  | non pertinent |
| 2230 | Ollivier et al.,           | 2016 | Clinical orthopaedics and related research. 2016; 474(1):60-68                                                                                                                                                                                                                                        | non pertinent |



|      |                          |      |                                                                                                                                                                                                |               |
|------|--------------------------|------|------------------------------------------------------------------------------------------------------------------------------------------------------------------------------------------------|---------------|
|      |                          |      | Pancreatology.<br>Conference: 48th<br>annual meeting of<br>the european<br>pancreatic club,<br>EPC 2016.<br>Liverpool united<br>kingdom.                                                       |               |
| 2231 | Olesen et al.,           | 2016 | Conference start:<br>20160706.<br>Conference end:<br>20160709.<br>Conference<br>publication:<br>(var.pagings).<br>16(3 SUPPL 1):43-<br>44<br>Cancer science.<br>2016;<br>107(12):1791-<br>1799 | non pertinent |
| 2232 | Okusaka et al.,          | 2016 | EBioMedicine.<br>2016; 13:348-355                                                                                                                                                              | non pertinent |
| 2233 | Okebe et al.,            | 2016 | Annals of<br>oncology: official j<br>of the european<br>society for<br>medical oncology.<br>2016; 27(1):106-<br>113                                                                            | non pertinent |
| 2234 | O'Shaughnessy et<br>al., | 2016 | Netherlands Trial<br>Registry. 2016<br>Biomed research<br>international.<br>2016                                                                                                               | non pertinent |
| 2235 | Ntr – Holewijn           | 2016 | Nursing. 2016;<br>46(2):17-23                                                                                                                                                                  | non pertinent |
| 2236 | Nowicka et al.,          | 2016 | Pain practice.<br>2016; 16(6):720-<br>729                                                                                                                                                      | non pertinent |
| 2237 | Notte et al.,            | 2016 | Clinical cancer<br>research. 2016;<br>22(1):54-60                                                                                                                                              | non pertinent |
| 2238 | North et al.,            | 2016 | Nutrition &<br>metabolism. 2016;<br>13(1)                                                                                                                                                      | non pertinent |
| 2239 | Noguchi et al.,          | 2016 | Eur J<br>Gastroenterol<br>Hepatol. 2016;<br>28(5):514-524                                                                                                                                      | non pertinent |
| 2240 | Niv et al.,              | 2016 | Pain practice.<br>2016; 16(7):820-<br>830                                                                                                                                                      | non pertinent |
| 2241 | Nilsson et al.,          | 2016 | J of clinical<br>endocrinology and<br>metabolism. 2016;<br>101(12):4690-<br>4698                                                                                                               | non pertinent |
| 2242 | Nickel et al.,           | 2016 | United european<br>gastroenterology<br>j. 2016; 4(5):A162-                                                                                                                                     | non pertinent |
| 2243 | Nella et al.,            | 2016 | National Library of<br>Medicine. 2016                                                                                                                                                          | non pertinent |
| 2244 | Neijenhuis et al.,       | 2016 |                                                                                                                                                                                                |               |
| 2245 | Nct – Scarlata           | 2016 |                                                                                                                                                                                                |               |

|      |                         |      |                                    |               |
|------|-------------------------|------|------------------------------------|---------------|
| 2246 | Nct – Chi-Wen           | 2016 | National Library of Medicine. 2016 | non pertinent |
| 2247 | Nct – Han               | 2016 | National Library of Medicine. 2016 | non pertinent |
| 2248 | Nct – Grassi            | 2016 | National Library of Medicine. 2016 | non pertinent |
| 2249 | Nct – Hoirisch-Clapauch | 2016 | National Library of Medicine. 2016 | non pertinent |
| 2250 | Nct – Geoffrion         | 2016 | National Library of Medicine. 2016 | non pertinent |
| 2251 | Nct – Bohm-Starke       | 2016 | National Library of Medicine. 2016 | non pertinent |
| 2252 | Nct – Miranda           | 2016 | National Library of Medicine. 2016 | non pertinent |
| 2253 | Nct – Zahran            | 2016 | National Library of Medicine. 2016 | non pertinent |
| 2254 | Nct – Oei               | 2016 | National Library of Medicine. 2016 | non pertinent |
| 2255 | Nct – Pelletier         | 2016 | National Library of Medicine. 2016 | non pertinent |
| 2256 | Nct – Arnold            | 2016 | National Library of Medicine. 2016 | non pertinent |
| 2257 | Nct – Rabinak           | 2016 | National Library of Medicine. 2016 | non pertinent |
| 2258 | Nct – Moro              | 2016 | National Library of Medicine. 2016 | non pertinent |
| 2259 | Nct – Michel-Cherqui    | 2016 | National Library of Medicine. 2016 | non pertinent |
| 2260 | Nct – Suhar             | 2016 | National Library of Medicine. 2016 | non pertinent |
| 2261 | Nct - Bailey            | 2016 | National Library of Medicine. 2016 | non pertinent |
| 2262 | Nct – Facina            | 2016 | National Library of Medicine. 2016 | non pertinent |
| 2263 | Nct – Bhardwaj          | 2016 | National Library of Medicine. 2016 | non pertinent |
| 2264 | Nct - Nazarini          | 2016 | National Library of Medicine. 2016 | non pertinent |
| 2265 | Nct - Waubant           | 2016 | National Library of Medicine. 2016 | non pertinent |
| 2266 | Nct - Miller            | 2016 | National Library of Medicine. 2016 | non pertinent |
| 2267 | Nct – Hall              | 2016 | National Library of Medicine. 2016 | non pertinent |
| 2268 | Nct – Mahajan           | 2016 | National Library of Medicine. 2016 | non pertinent |
| 2269 | Nct - Jia               | 2016 | National Library of Medicine. 2016 | non pertinent |
| 2270 | Nct – Zhang             | 2016 | National Library of Medicine. 2016 | non pertinent |
| 2271 | Nct – Chrisman          | 2016 | National Library of Medicine. 2016 | non pertinent |
| 2272 | Nct – Sussman           | 2016 | National Library of Medicine. 2016 | non pertinent |
| 2273 | Nct – Liechti           | 2016 | National Library of Medicine. 2016 | non pertinent |
| 2274 | Nct – Karatosun         | 2016 | National Library of Medicine. 2016 | non pertinent |
| 2275 | Nct – Nieves            | 2016 | National Library of Medicine. 2016 | non pertinent |
| 2276 | Nct – Namrawy           | 2016 | National Library of Medicine. 2016 | non pertinent |
| 2277 | Nct - Stavropoulou      | 2016 | National Library of Medicine. 2016 | non pertinent |
| 2278 | Nct – Tasian            | 2016 | National Library of Medicine. 2016 | non pertinent |

|      |                                        |      |                                                              |               |
|------|----------------------------------------|------|--------------------------------------------------------------|---------------|
| 2279 | Nct – Beidel                           | 2016 | National Library of Medicine. 2016<br>BMC                    | non pertinent |
| 2280 | Nct – Paul et al.,                     | 2016 | Musculoskelet Disord. 2016 Aug; 17(1):360                    | non pertinent |
| 2281 | Nct – Hughes                           | 2016 | National Library of Medicine. 2016                           | non pertinent |
| 2282 | Nct – Bond                             | 2016 | National Library of Medicine. 2016                           | non pertinent |
| 2283 | Nct – Oh et al.,                       | 2016 | Am J Sports Med. 2018 Mar; 46(3):679-686                     | non pertinent |
| 2284 | Nct – Sheffield Hallam University      | 2016 | National Library of Medicine. 2016                           | non pertinent |
| 2285 | Nct – Cheung                           | 2016 | National Library of Medicine. 2016                           | non pertinent |
| 2286 | Nct – Cristiana Care Health Services   | 2016 | National Library of Medicine. 2016                           | non pertinent |
| 2287 | Nct – Hillis-Trupe                     | 2016 | National Library of Medicine. 2016                           | non pertinent |
| 2288 | Nct – Germanotta et al.,               | 2016 | J Neuroeng Rehabil. 2018 May; 15(1):39                       | non pertinent |
| 2289 | Nct - Kvarstein                        | 2016 | National Library of Medicine. 2016                           | non pertinent |
| 2290 | Nct - Spies                            | 2016 | National Library of Medicine. 2016                           | non pertinent |
| 2291 | Nct – Apkarian                         | 2016 | National Library of Medicine. 2016                           | non pertinent |
| 2292 | Nct – University Hospital, Montpellier | 2016 | National Library of Medicine. 2016                           | non pertinent |
| 2293 | Nct – Roitman                          | 2016 | National Library of Medicine. 2016                           | non pertinent |
| 2294 | Nct - Heapy                            | 2016 | National Library of Medicine. 2016                           | non pertinent |
| 2295 | Nct – Barrera                          | 2016 | National Library of Medicine. 2016                           | non pertinent |
| 2296 | Nct – Crenshaw                         | 2016 | National Library of Medicine. 2016                           | non pertinent |
| 2297 | Nct – Jensen                           | 2016 | National Library of Medicine. 2016                           | non pertinent |
| 2298 | Nct – Madan                            | 2016 | National Library of Medicine. 2016                           | non pertinent |
| 2299 | Nct – Sanzo                            | 2016 | National Library of Medicine. 2016                           | non pertinent |
| 2300 | Nct – Liu-Ambrose                      | 2016 | National Library of Medicine. 2016                           | non pertinent |
| 2301 | Nct – Schuman-Olivier                  | 2016 | National Library of Medicine. 2016                           | non pertinent |
| 2302 | Nct - Putman                           | 2016 | National Library of Medicine. 2016                           | non pertinent |
| 2303 | Nct - Kvarstein                        | 2016 | National Library of Medicine. 2016                           | non pertinent |
| 2304 | Nct - Williams                         | 2016 | National Library of Medicine. 2016                           | non pertinent |
| 2305 | Nan et al.,                            | 2016 | J of neurogastroenterology and motility. 2016; 22(1):118-128 | non pertinent |

|      |                         |      |                                                                                                        |               |
|------|-------------------------|------|--------------------------------------------------------------------------------------------------------|---------------|
| 2306 | Nalamachu et al.,       | 2016 | Current medical research and opinion. 2016; 32(7):1311-1317                                            | non pertinent |
| 2307 | Naik et al.,            | 2016 | Anesthesia and Analgesia. 2016; 122(5):1646-1653                                                       | non pertinent |
| 2308 | Myhre et al.,           | 2016 | Anesthesiology. 2016; 124(1):141-149                                                                   | non pertinent |
| 2309 | Murugaiyan et al.,      | 2016 | Annals of indian academy of neurology. 2016; 19(6):109-                                                | non pertinent |
| 2310 | Muresanu et al.,        | 2016 | Stroke: a j of cerebral circulation. 2016; 47(1):151-159                                               | non pertinent |
| 2311 | Mulvenna et al.,        | 2016 | Lancet. 2016; 388(10055):2004-2014                                                                     | non pertinent |
| 2312 | Mueller et al.,         | 2016 | Experimental dermatology. Conference: 2nd inflammatory skin disease summit. United states. 2016; 25:27 | non pertinent |
| 2313 | Mu et al.,              | 2016 | Clinical rheumatology. 2016; 35(1):165-173                                                             | non pertinent |
| 2314 | Mourad et al.,          | 2016 | European j of cardiovascular nursing. 2016; 15:44-                                                     | non pertinent |
| 2315 | Moulton et al.,         | 2016 | Radiation oncology (london, england). 2016; 11(1)                                                      | non pertinent |
| 2316 | Mosquera et al.,        | 2016 | Cancer genetics. 2016; 209(12):567-581                                                                 | non pertinent |
| 2317 | Mosaffa-Jahromi et al., | 2016 | J of ethnopharmacology. 2016; 194:937-946                                                              | non pertinent |
| 2318 | Moryl et al.,           | 2016 | J of opioid management. 2016; 12(1):47-55                                                              | non pertinent |
| 2319 | Morrow et al.,          | 2016 | Molecular therapy – oncolytics. 2016; 3                                                                | non pertinent |
| 2320 | Morrissey et al.,       | 2016 | Manual therapy. 2016; 25:e107-e108                                                                     | non pertinent |
| 2321 | Morin et al.,           | 2016 | J of sexual medicine. 2016; 13(6):243-                                                                 | non pertinent |
| 2322 | Morin et al.,           | 2016 | Trials. 2016; 17(1)                                                                                    | non pertinent |
| 2323 | Morel et al.,           | 2016 | PLoS One. 2016; 11(4)                                                                                  | non pertinent |

|      |                     |      |                                                                                                                                                                                                                                                                                                      |               |
|------|---------------------|------|------------------------------------------------------------------------------------------------------------------------------------------------------------------------------------------------------------------------------------------------------------------------------------------------------|---------------|
| 2324 | Moore et al.,       | 2016 | BMC<br>anesthesiology. 2016; 16(1)                                                                                                                                                                                                                                                                   | non pertinent |
| 2325 | Mooney et al.,      | 2016 | Clinical<br>pharmacology and<br>therapeutics. 2016; 100(4):344-352                                                                                                                                                                                                                                   | non pertinent |
| 2326 | Moeen               | 2016 | Paediatric<br>anaesthesia. 2016; 26(8):807-814                                                                                                                                                                                                                                                       | non pertinent |
| 2327 | Miyazaki et al.,    | 2016 | Methods in<br>pharmacology and<br>toxicology. 2016; 37-52                                                                                                                                                                                                                                            | non pertinent |
| 2328 | Miyazaki et al.,    | 2016 | Cardiovascular<br>and interventional<br>radiology. 2016; 39(10):1464-1470                                                                                                                                                                                                                            | non pertinent |
| 2329 | Miskowiak et al.,   | 2016 | Neuropsychophar<br>macology. 2016; 41:361-                                                                                                                                                                                                                                                           | non pertinent |
| 2330 | Mischkowski et al., | 2016 | Soc Cogn Affect<br>Neurosci. 2016; 11(9):1345-1353                                                                                                                                                                                                                                                   | non pertinent |
| 2331 | Mir et al.,         | 2016 | The lancet.<br>Oncology. 2016; 17(5):632-641                                                                                                                                                                                                                                                         | non pertinent |
| 2332 | Mir et al.,         | 2016 | Lancet oncology.<br>2016; 17(12):1732-1742                                                                                                                                                                                                                                                           | non pertinent |
| 2333 | Miller et al.,      | 2016 | J of clinical<br>endocrinology and<br>metabolism. 2016; 101(8):3163-3170                                                                                                                                                                                                                             | non pertinent |
| 2334 | Meyers et al.,      | 2016 | Clinical<br>pharmacology in<br>drug<br>development. 2016; 5(6):450-459                                                                                                                                                                                                                               | non pertinent |
| 2335 | Metyas et al.,      | 2016 | Arthritis and<br>rheumatology.<br>Conference:<br>american college<br>of<br>rheumatology/ass<br>ociation of<br>rheumatology<br>health<br>professionals<br>annual scientific<br>meeting,<br>ACR/ARHP 2016.<br>United states.<br>Conference<br>start:20161111.<br>Conference end:<br>20161116; 68:64-65 | non pertinent |

|      |                    |      |                                                                                                                                                                                                                                  |               |
|------|--------------------|------|----------------------------------------------------------------------------------------------------------------------------------------------------------------------------------------------------------------------------------|---------------|
|      |                    |      | Postgraduate<br>medicine.<br>Conference: 2016<br>pain week<br>conference.                                                                                                                                                        |               |
| 2336 | Menzaghi et al.,   | 2016 | United states.<br>Conference start:<br>20160906.<br>Conference end:<br>20160910; 128:86-<br>87                                                                                                                                   | non pertinent |
| 2337 | Mendis et al.,     | 2016 | J Sci Med Sport.<br>2016; 19(11):866-<br>871                                                                                                                                                                                     | non pertinent |
| 2338 | Mendell et al.,    | 2016 | Annals of<br>neurology. 2016;<br>79(2):257-271                                                                                                                                                                                   | non pertinent |
| 2339 | Meissner et al.,   | 2016 | Obstet Gynecol.<br>2016; 128(5):1134-<br>1142                                                                                                                                                                                    | non pertinent |
| 2340 | Meisel et al.,     | 2016 | European j of<br>cancer (Oxford,<br>Enland : 1990).<br>2016; 56:93-100                                                                                                                                                           | non pertinent |
| 2341 | McMurdo et al.,    | 2016 | Arthritis care &<br>research. 2016;<br>68(5):716-721                                                                                                                                                                             | non pertinent |
| 2342 | McLeod et al.,     | 2016 | Brain injury. 2016;<br>30(5-6):635-                                                                                                                                                                                              | non pertinent |
| 2343 | McGowan et al.,    | 2016 | PLoS One. 2016;<br>11(6)                                                                                                                                                                                                         | non pertinent |
| 2344 | McEneny et al.,    | 2016 | Atherosclerosis.<br>2016; 244:172-178                                                                                                                                                                                            | non pertinent |
| 2345 | McCormick et al.,  | 2016 | PM and r. 2016;<br>8(11):1039-1045                                                                                                                                                                                               | non pertinent |
| 2346 | McClelland et al., | 2016 | PLoS One. 2016;<br>11(3):e0148606                                                                                                                                                                                                | non pertinent |
| 2347 | McBain et al.,     | 2016 | Annals of the<br>rheumatic<br>diseases. 2016;<br>75(7):1343-1349                                                                                                                                                                 | non pertinent |
| 2348 | Mazzini et al.,    | 2016 | Amyotrophic<br>lateral sclerosis<br>and<br>frontotemporal<br>degeneration.<br>Conference: 27th<br>international<br>symposium an<br>ALS/MND.<br>Ireland.<br>Conference start:<br>20161207.<br>Conference end:<br>20161209; 17:243 | non pertinent |
| 2349 | Mayr et al.,       | 2016 | British j of<br>anaesthesia. 2016;<br>116(1):90-99                                                                                                                                                                               | non pertinent |
| 2350 | Mauermann et al.,  | 2016 | Anesthesiology.<br>2016; 124(2):453-<br>463                                                                                                                                                                                      | non pertinent |
| 2351 | Mathur et al.,     | 2016 | Indian j of dental<br>research. 2016;<br>27(6):623-629                                                                                                                                                                           | non pertinent |

|      |                        |      |                                                                               |               |
|------|------------------------|------|-------------------------------------------------------------------------------|---------------|
| 2352 | Mathieson et al.,      | 2016 | Trials. 2016; 17(1)                                                           | non pertinent |
| 2353 | Mathialagan et al.,    | 2016 | Oral oncology. 2016; 61:142-145                                               | non pertinent |
| 2354 | Massé-Alarie et al.,   | 2016 | Scandinavian j of pain. 2016; 12:74-83                                        | non pertinent |
| 2355 | Masman et al.,         | 2016 | J Pain Symptom Manage. 2016; 52(2):212-220.e213                               | non pertinent |
| 2356 | Martin et al.,         | 2016 | Drugs in r and d. 2016; 16(1):81-92                                           | non pertinent |
| 2357 | Mariano et al.,        | 2016 | Pain Med. 2016; 17(4):737-745                                                 | non pertinent |
| 2358 | Manvar et al.,         | 2016 | Regional anesthesia and pain medicine. 2016; 41(5)                            | non pertinent |
| 2359 | Manning et al.,        | 2016 | Academic emergency medicine. 2016; 23(7):766-771                              | non pertinent |
| 2360 | Mangas-Sanjuan et al., | 2016 | British j of clincial pharmacology. 2016; 82(1):92-107                        | non pertinent |
| 2361 | Malavera et al.,       | 2016 | J Pain. 2016; 17(8):911-918                                                   | non pertinent |
| 2362 | Malagaria et al.,      | 2016 | Cardiovascular and interventional radiology. 2016; 39(10):1379-1391           | non pertinent |
| 2363 | Maksymowych et al.,    | 2016 | J of rheumatology. 2016; 43(6):1232-1233                                      | non pertinent |
| 2364 | Majumder et al.,       | 2016 | European j of cancer (Oxford, England : 1990). 2016; 65:43-51                 | non pertinent |
| 2365 | Mai et al.,            | 2016 | Guangming j of chinese medicine (guang ming zhong yi). 2016; 31(15):2226-2229 | non pertinent |
| 2366 | Mahshidfar et al.      | 2016 | Indian j of critical care medicine. 2016; 20(8):465-468                       | non pertinent |

|      |                 |      |                                                                                                                                                                                                                                                                                                                                          |               |
|------|-----------------|------|------------------------------------------------------------------------------------------------------------------------------------------------------------------------------------------------------------------------------------------------------------------------------------------------------------------------------------------|---------------|
|      |                 |      | Allergy: european<br>j of allergy and<br>clinical<br>immunology.<br>Conference: 35th<br>Annual Congress<br>of the European<br>Academy of<br>Allergy and<br>Clinical<br>Immunology,<br>EAACI 2016.<br>Austria.<br>Conference start:<br>20160611.<br>Conference end:<br>20160615; 71:298<br>Cancer<br>chemotherapy<br>and<br>pharmacology. |               |
| 2367 | Mahler et al.,  | 2016 | 2016; 78(1):157-165                                                                                                                                                                                                                                                                                                                      | non pertinent |
| 2368 | Mahipal et al., | 2016 | Rheumatologia.<br>2016; 30(2):19-32                                                                                                                                                                                                                                                                                                      | non pertinent |
| 2369 | Maheu et al.,   | 2016 | J of affective<br>disorders. 2016;<br>192:98-103                                                                                                                                                                                                                                                                                         | non pertinent |
| 2370 | Mahabir et al., | 2016 | Anaesthesiol<br>Intensive Ther.<br>2016; 48(4):234-238                                                                                                                                                                                                                                                                                   | non pertinent |
| 2371 | Madro et al.,   | 2016 | BJU international.<br>2016; 118(4):590-597                                                                                                                                                                                                                                                                                               | non pertinent |
| 2372 | Madan et al.,   | 2016 | Toxins (Basel).<br>2016; 8(12)                                                                                                                                                                                                                                                                                                           | non pertinent |
| 2373 | Machado et al., | 2016 | Neuroimage.<br>2016; 135:186-196                                                                                                                                                                                                                                                                                                         | non pertinent |
| 2374 | Ma et al.,      | 2016 | Zhonguo xiu fu<br>chong jian wai ke<br>za zhi (Chinese j<br>of reparative and<br>reconstructive<br>surgery). 2016;<br>30(3):328-335                                                                                                                                                                                                      | non pertinent |
| 2375 | Ma et al.,      | 2016 | Frontiers in<br>behavioral<br>neuroscience.<br>2016; 10(OCT)<br>Brain impairment.                                                                                                                                                                                                                                                        | non pertinent |
| 2376 | Lyu et al.,     | 2016 | 2016; 17(3):286-287                                                                                                                                                                                                                                                                                                                      | non pertinent |
| 2377 | Lyu et al.,     | 2016 | Biomed research<br>international.<br>2016                                                                                                                                                                                                                                                                                                | non pertinent |
| 2378 | Luongo et al.,  | 2016 | Research and<br>reports in urology.<br>2016; 8:217-224                                                                                                                                                                                                                                                                                   | non pertinent |
| 2379 | Luo et al.,     | 2016 | Neuro-oncology.<br>2016; 18(9):1319-1325                                                                                                                                                                                                                                                                                                 | non pertinent |
| 2380 | Lulla et al.,   | 2016 | Nutrition j. 2016;<br>15:14                                                                                                                                                                                                                                                                                                              | non pertinent |
| 2381 | Lugo et al.,    | 2016 |                                                                                                                                                                                                                                                                                                                                          | non pertinent |



|      |                          |      |                                                                           |               |
|------|--------------------------|------|---------------------------------------------------------------------------|---------------|
| 2382 | Luder et al.,            | 2016 | Annals of the<br>rheumatic<br>diseases. 2016;<br>75:1308-                 | non pertinent |
| 2383 | Ludbrook et al.,         | 2016 | British j of<br>dermatology.<br>2016; 174(5):985-<br>995                  | non pertinent |
| 2384 | Lu et al.,               | 2016 | PLoS One. 2016;<br>11(6)                                                  | non pertinent |
| 2385 | Louca Jounger et<br>al., | 2016 | PLoS One. 2016;<br>11(12):e0168703                                        | non pertinent |
| 2386 | Lou et al.,              | 2016 | Clinical<br>otolaryngology.<br>2016; 41(6):744-<br>749                    | non pertinent |
| 2387 | LoRusso et al.,          | 2016 | Clinical cancer<br>research. 2016;<br>22(13):3227-3237                    | non pertinent |
| 2388 | Loret et al.,            | 2016 | Retrovirology.<br>2016; 13(1)                                             | non pertinent |
| 2389 | Lohle et al.,            | 2016 | Cardiovascular<br>and interventional<br>radiology. 2016;<br>39(3):123-124 | non pertinent |
| 2390 | Liu et al.,              | 2016 | Basic & clinical<br>pharmacology &<br>toxicology. 2016;<br>119(1):93-100  | non pertinent |
| 2391 | Lipton et al.,           | 2016 | The lancet.<br>Oncology. 2016;<br>17(5):612-621                           | non pertinent |
| 2392 | Liou et al.,             | 2016 | Gut. 2016;<br>65(11):1784-1792                                            | non pertinent |
| 2393 | Liou et al.,             | 2016 | American j of<br>gastroenterology.<br>2016; 111(3):381-<br>387            | non pertinent |
| 2394 | Lin et al.,              | 2016 | Medicine (united<br>states). 2016;<br>95(34)                              | non pertinent |
| 2395 | Lin et al.,              | 2016 | Canadian j of<br>emergency<br>medicine. 2016;<br>18(4):315-318            | non pertinent |
| 2396 | Lin et al.,              | 2016 | Sci Rep. 2016;<br>6:37816                                                 | non pertinent |
| 2397 | Lin et al.,              | 2016 | BMC<br>musculoskeletal<br>disorders. 2016;<br>17(1):374                   | non pertinent |
| 2398 | Limsrivilai et al.,      | 2016 | American j of<br>gastroenterology.<br>2016; 111(2):217-<br>224            | non pertinent |
| 2399 | Lima et al.,             | 2016 | Arthritis care &<br>research. 2016;<br>68(1):91-98                        | non pertinent |
| 2400 | Liang et al.,            | 2016 | Psychiatry<br>research. 2016;<br>240:80-87                                | non pertinent |

|      |                           |      |                                                                                                                                                                                                                                                                                                               |               |
|------|---------------------------|------|---------------------------------------------------------------------------------------------------------------------------------------------------------------------------------------------------------------------------------------------------------------------------------------------------------------|---------------|
|      |                           |      | Stroke.<br>Conference:<br>american heart<br>association/ameri<br>can stroke<br>association 2016<br>international<br>stroke conference<br>and state-of-the-<br>angeles. CA united<br>states. Conference<br>start: 20160216.<br>Conference end:<br>20160219.<br>Conference<br>publication:<br>(var.pagings); 47 |               |
| 2401 | Li et al.,                | 2016 |                                                                                                                                                                                                                                                                                                               | non pertinent |
| 2402 | Lin et al.,               | 2016 | BMC<br>anesthesiology.<br>2016; 16:24                                                                                                                                                                                                                                                                         | non pertinent |
| 2403 | Lin et al.,               | 2016 | Medicine (united<br>states). 2016;<br>95(15)                                                                                                                                                                                                                                                                  | non pertinent |
| 2404 | LeWitt et al.,            | 2016 | Movement<br>disorders. 2016;<br>31(9):1356-1365                                                                                                                                                                                                                                                               | non pertinent |
| 2405 | Lewis et al.,             | 2016 | PLoS One. 2016;<br>11(4)                                                                                                                                                                                                                                                                                      | non pertinent |
| 2406 | Lewis et al.,             | 2016 | Alcohol Clin Exp<br>Res. 2016;<br>40(12):2519-2527                                                                                                                                                                                                                                                            | non pertinent |
| 2407 | Levy-Cooperman<br>et al., | 2016 | Epilepsy &<br>behavior. 2016;<br>61:63-71                                                                                                                                                                                                                                                                     | non pertinent |
| 2408 | Leung et al.,             | 2016 | Trials. 2016;<br>17(1):421                                                                                                                                                                                                                                                                                    | non pertinent |
| 2409 | Lelic et al.,             | 2016 | Eur J Neurosci.<br>2016; 44(11):2966-<br>2974                                                                                                                                                                                                                                                                 | non pertinent |
| 2410 | Lekander et al.,          | 2016 | Brain Behav<br>Immun. 2016;<br>56:34-41                                                                                                                                                                                                                                                                       | non pertinent |
| 2411 | Lei et al.,               | 2016 | Beneficial<br>microbes. 2016;<br>7(5):631-637                                                                                                                                                                                                                                                                 | non pertinent |
| 2412 | Lee et al.,               | 2016 | Z Orthop Unfall.<br>2016; 154(6):571-<br>577                                                                                                                                                                                                                                                                  | non pertinent |
| 2413 | Lee et al.,               | 2016 | J of rheumatology.<br>2016; 43(1):38-45                                                                                                                                                                                                                                                                       | non pertinent |
| 2414 | Lee et al.,               | 2016 | Clinical<br>therapeutics.<br>2016; 38(3):557-<br>573                                                                                                                                                                                                                                                          | non pertinent |
| 2415 | Lee et al.,               | 2016 | Dermatologic<br>therapy. 2016;<br>29(3):184-190                                                                                                                                                                                                                                                               | non pertinent |

|      |                     |      |                                                                                                                                                                      |               |
|------|---------------------|------|----------------------------------------------------------------------------------------------------------------------------------------------------------------------|---------------|
|      |                     |      | Thorax.                                                                                                                                                              |               |
|      |                     |      | Conference:                                                                                                                                                          |               |
| 2416 | Ledson et al.,      | 2016 | british thoracic society winter meeting 2016. United kingdom; 71:A138-A139                                                                                           | non pertinent |
| 2417 | Leblanc et al.,     | 2016 | Anaesth Crit Care Pain Med. 2016; 35(2):109-114                                                                                                                      | non pertinent |
| 2418 | Leasure et al.,     | 2016 | Ochsner j. 2016; 16(1):e5-e6                                                                                                                                         | non pertinent |
| 2419 | Lazarus et al.,     | 2016 | PLoS One. 2016; 11(11)                                                                                                                                               | non pertinent |
| 2420 | Lauche et al.,      | 2016 | Complementary therapies in medicine. 2016; 26:171-177                                                                                                                | non pertinent |
| 2421 | Larsson et al.,     | 2016 | Radiation protection dosimetry. 2016; 169(1-4):123-129                                                                                                               | non pertinent |
| 2422 | Laque et al.,       | 2016 | Clinical Neurophysiology. 2016; 127(3):e9-                                                                                                                           | non pertinent |
| 2423 | Lambertini et al.,  | 2016 | Supportive care in cancer. 2016; 24(3):1285-1294                                                                                                                     | non pertinent |
| 2424 | Lam et al.,         | 2016 | Gut. 2016; 65(1):91-99                                                                                                                                               | non pertinent |
| 2425 | Labuschagne et al., | 2016 | J of neurology, neurosurgery and psychiatry. 2016; 87:A103-                                                                                                          | non pertinent |
| 2426 | Labrenz et al.,     | 2016 | Neuroimage. 2016; 130:104-114                                                                                                                                        | non pertinent |
| 2427 | Kunz et al.,        | 2016 | J of the european academy of dermatology and venereology : JEADV. 2016; 30(2):293-298                                                                                | non pertinent |
| 2428 | Kunoe et al.,       | 2016 | BMC pharmacology and toxicology. 2016; 17(1)                                                                                                                         | non pertinent |
| 2429 | Kumar et al.,       | 2016 | Blood. Confernece: 58th annual meeting of the american society of hematology. ASH 2016. United states. Conference start: 20161203. Conference end: 20161206; 128(22) | non pertinent |
| 2430 | Kudiganti et al.,   | 2016 | Lipids in health and disease. 2016; 15(1)                                                                                                                            | non pertinent |
| 2431 | Kucyi et al.,       | 2016 | Pain. 2016; 157(9):1895-1904                                                                                                                                         | non pertinent |

|      |                        |      |                                                                                                                                                                      |               |
|------|------------------------|------|----------------------------------------------------------------------------------------------------------------------------------------------------------------------|---------------|
| 2432 | Krumpl et al.,         | 2016 | European j of pharmaceutical sciences. 2016; 92:64-73                                                                                                                | non pertinent |
| 2433 | Kroes et al.,          | 2016 | Neuropsychopharmacology. 2016; 41(6):1569-1578                                                                                                                       | non pertinent |
| 2434 | Kovanen et al.,        | 2016 | European addiction research. 2016; 22(2):70-79                                                                                                                       | non pertinent |
| 2435 | Kosek et al.,          | 2016 | Brain Behav Immun. 2016; 58:218-227                                                                                                                                  | non pertinent |
| 2436 | Koh et al.,            | 2016 | Anaesthesia. 2016; 71(6):692-699                                                                                                                                     | non pertinent |
| 2437 | Koch et al.,           | 2016 | Neuropsychopharmacology. 2016; 41(6):1495-1504                                                                                                                       | non pertinent |
| 2438 | Koch et al.,           | 2016 | Neuropsychopharmacology. 2016; 41(8):2041-2051                                                                                                                       | non pertinent |
| 2439 | Knoop                  | 2016 | Psycho-oncology. 2016; 25:119-121                                                                                                                                    | non pertinent |
| 2440 | Kilic et al.,          | 2016 | Saudi medical j. 2016; 37(11):1191-1195                                                                                                                              | non pertinent |
| 2441 | Kittipeerachon et al., | 2016 | Schizophrenia research. 2016; 176(2-3):231-238                                                                                                                       | non pertinent |
| 2442 | Kise et al.,           | 2016 | Bmj. 2016; 354:i3740                                                                                                                                                 | non pertinent |
| 2443 | King et al.,           | 2016 | Frontiers in Psychiatry. 2016; 7(SEP)                                                                                                                                | non pertinent |
| 2444 | Kimura et al.,         | 2016 | International j of urology. 2016; 23(5):395-403                                                                                                                      | non pertinent |
| 2445 | Kimura et al.,         | 2016 | BMJ Open. 2016; 6(9):e010999                                                                                                                                         | non pertinent |
| 2446 | Kim et al.,            | 2016 | Yonsei medical j. 2016; 57(2):490-495                                                                                                                                | non pertinent |
| 2447 | Kim et al.,            | 2016 | Blood. Conference: 58th annual meeting of the american society of hematology. ASH 2016. United states. Conference start: 20161203. Conference end: 20161206; 128(22) | non pertinent |
| 2448 | Kim et al.,            | 2016 | European spine j. 2016; 25(5):1614-1619                                                                                                                              | non pertinent |
| 2449 | Kim et al.,            | 2016 | Clinical orthopaedics and related research. 2016; 474(3):776-783                                                                                                     | non pertinent |

|      |                     |      |                                                                |               |
|------|---------------------|------|----------------------------------------------------------------|---------------|
| 2450 | Kim et al.,         | 2016 | Medicine. 2016; 95(18):e3593                                   | non pertinent |
| 2451 | Kim et al.,         | 2016 | Yonsei Med J. 2016; 57(4):980-986                              | non pertinent |
| 2452 | Kim et al.,         | 2016 | CNS spectrums. 2016; 21(6):466-477                             | non pertinent |
| 2453 | Khurana et al.,     | 2016 | J of cancer research and therapeutics. 2016; 12(6):69-         | non pertinent |
| 2454 | Khasnavis et al.,   | 2016 | Molecular genetics and metabolism. 2016; 118(3):160-166        | non pertinent |
| 2455 | Khalil et al.,      | 2016 | J of clinical anesthesia. 2016; 32:242-247                     | non pertinent |
| 2456 | Khalil et al.,      | 2016 | Clinical cancer research. 2016; 22(21):5204-5210               | non pertinent |
| 2457 | Khachatryan et al., | 2016 | New armenian medical j. 2016; 10(3):11-16                      | non pertinent |
| 2458 | Kerbrat et al.,     | 2016 | N Engl J Med. 2016; 375(18):1717-1725                          | non pertinent |
| 2459 | Keipert             | 2016 | Advances in experimental medicine and biology. 2016; 923:23-29 | non pertinent |
| 2460 | Keefe et al.,       | 2016 | Annals of oncology. 2016; 27(8):1579-1585                      | non pertinent |
| 2461 | Kearns et al.,      | 2016 | Anaesthesia. 2016; 71(12):1431-1440                            | non pertinent |
| 2462 | Kct - Yoonhee       | 2016 | Clinical Research Information Service – CRIS. 2016             | non pertinent |
| 2463 | Kazandijan et al.,  | 2016 | Oncologist. 2016; 21(5):634-642                                | non pertinent |
| 2464 | Kawai et al.,       | 2016 | Japanese j of clinical oncology. 2016; 46(3):248-253           | non pertinent |
| 2465 | Kasang et al.,      | 2016 | PLoS One. 2016; 11(1)                                          | non pertinent |
| 2466 | Karamanolis et al., | 2016 | Arthritis research & therapy. 2016; 18(1)                      | non pertinent |
| 2467 | Kaput et al.,       | 2016 | J of General Internal Medicine. 2016; 31(2):661-               | non pertinent |
| 2468 | Kangovi et al.,     | 2016 | J of General Internal Medicine. 2016; 31(2):173-174            | non pertinent |

|      |                              |      |                                                                                                                    |               |
|------|------------------------------|------|--------------------------------------------------------------------------------------------------------------------|---------------|
| 2469 | Kang et al.,                 | 2016 | Cancer research and treatment. 2016; 48(2):458-464                                                                 | non pertinent |
| 2470 | Jung et al.,                 | 2016 | BMJ Open. 2016; 6(11)                                                                                              | non pertinent |
| 2471 | Juel et al.,                 | 2016 | Pain Pract. 2016; 16(6):669-679                                                                                    | non pertinent |
| 2472 | Jprn, Umin – Tetsuaki        | 2016 | UMIN-CTR Clinical Trial. 2016                                                                                      | non pertinent |
| 2473 | Jprn, Umin - Nakamura        | 2016 | UMIN-CTR Clinical Trial. 2016                                                                                      | non pertinent |
| 2474 | Jprn, Umin – Shimizu         | 2016 | UMIN-CTR Clinical Trial. 2016                                                                                      | non pertinent |
| 2475 | Jprn, Umin – Shin-ichi konno | 2016 | UMIN-CTR Clinical Trial. 2016                                                                                      | non pertinent |
| 2476 | Jounger et al.,              | 2016 | PLoS One. 2016; 11(12)                                                                                             | non pertinent |
| 2477 | Jones et al.,                | 2016 | Pain and therapy. 2016; 5(1):107-113                                                                               | non pertinent |
| 2478 | Jones et al.,                | 2016 | Dermatologic surgery. 2016; 42(1):38-49                                                                            | non pertinent |
| 2479 | Johansson                    | 2016 | Acta orthopaedica. 2016; 87(1):79-82                                                                               | non pertinent |
| 2480 | Johannesson et al.,          | 2016 | J of lower genital tract disease. 2016; 20(4):6-8                                                                  | non pertinent |
| 2481 | Jia et al.,                  | 2016 | Zhongguo xiu fu chong jian wai ke za zhi (Chinese j of reparative and reconstructive surgery). 2016; 30(3):328-335 | non pertinent |
| 2482 | Jensen et al.,               | 2016 | Int J Clin Exp Hypn. 2016; 64(1):1-23                                                                              | non pertinent |
| 2483 | Janum et al.,                | 2016 | Innate immunity. 2016; 22(7):546-556                                                                               | non pertinent |
| 2484 | Janssens et al.,             | 2016 | Clinical biomechanics (Bristol, Avon). 2016; 32:40-48                                                              | non pertinent |
| 2485 | Janssens et al.,             | 2016 | Radiotherapy and oncology. 2016; 119(2):213-220                                                                    | non pertinent |

|      |                                  |      |                                                               |               |
|------|----------------------------------|------|---------------------------------------------------------------|---------------|
|      |                                  |      | Foot and ankle surgery.                                       |               |
|      |                                  |      | Conference: foot international 2016 congress. Berlin germany. |               |
| 2486 | Janin                            | 2016 | Conference start: 20160623.                                   | non pertinent |
|      |                                  |      | Conference end: 20160625.                                     |               |
|      |                                  |      | Conference publication: (var.pagings); 22(2 SUPPL 1):18       |               |
| 2487 | Jamshed et al.,                  | 2016 | Vaccine. 2016; 34(5):630-635                                  | non pertinent |
| 2488 | James et al.,                    | 2016 | Health technology assessment. 2016; 20(53):1-127              | non pertinent |
| 2489 | Jafarpour et al.,                | 2016 | J of ethnopharmacology. 2016; 179:170-176                     | non pertinent |
| 2490 | Jafarinia et al.,                | 2016 | J of affective disorders. 2016; 204:1-8                       | non pertinent |
| 2491 | Jacobs et al.,                   | 2016 | Breast cancer research and treatment. 2016; 155(1):77-84      | non pertinent |
| 2492 | Jackson et al.,                  | 2016 | Heart (British Cardiac Society). 2016; 102:A95-               | non pertinent |
| 2493 | Izurietta et al.,                | 2016 | Pediatric infectious disease j. 2016; 35(2):e35-e47           | non pertinent |
| 2494 | Isrctn – Linni                   | 2016 | ISRCTN registry. 2016                                         | non pertinent |
| 2495 | Isrctn – Tschugg                 | 2016 | ISRCTN registry. 2016                                         | non pertinent |
| 2496 | Isrctn – Gordon                  | 2016 | ISRCTN registry. 2016                                         | non pertinent |
| 2497 | Isrctn – Foster                  | 2016 | ISRCTN registry. 2016                                         | non pertinent |
| 2498 | Isrctn – Gliner                  | 2016 | ISRCTN registry. 2016                                         | non pertinent |
| 2499 | Isrctn – Bhattacharyya           | 2016 | ISRCTN registry. 2016                                         | non pertinent |
| 2500 | Isrctn - Stathi                  | 2016 | ISRCTN registry. 2016                                         | non pertinent |
| 2501 | Isabelle et al.,                 | 2016 | J of clinical oncology. 2016; 34(36):4345-4353                | non pertinent |
| 2502 | Ironside et al.,                 | 2016 | Biol Psychiatry. 2016; 79(10):823-830                         | non pertinent |
| 2503 | Irct2016092125067N – Hosieni     | 2016 | Iranian Registry of Clinical Trials – IRCT. 2016              | non pertinent |
| 2504 | Irct2016022926846N - Ghanbarinia | 2016 | Iranian Registry of Clinical Trials – IRCT. 2016              | non pertinent |
| 2505 | Irct2015111625067N – Hosieni     | 2016 | Iranian Registry of Clinical Trials – IRCT. 2016              | non pertinent |

|      |                                           |      |                                                                                                                                                                                                                                                                                                           |               |
|------|-------------------------------------------|------|-----------------------------------------------------------------------------------------------------------------------------------------------------------------------------------------------------------------------------------------------------------------------------------------------------------|---------------|
| 2506 | Irct201512194443<br>N –<br>Zakerimoghadam | 2016 | Iranian Registry of<br>Clinical Trials –<br>IRCT. 2016                                                                                                                                                                                                                                                    | non pertinent |
| 2507 | Isrct20150110106<br>1N                    | 2016 | Iranian Registry of<br>Clinical Trials –<br>IRCT. 2016                                                                                                                                                                                                                                                    | non pertinent |
| 2508 | Iosifidis et al.,                         | 2016 | Surgical and<br>radiological<br>anatomy. 2016;<br>38(1):33                                                                                                                                                                                                                                                | non pertinent |
| 2509 | Ickmans et al.,                           | 2016 | J Physiother. 2016;<br>62(3):165                                                                                                                                                                                                                                                                          | non pertinent |
| 2510 | Ichesco et al.,                           | 2016 | Arthritis and<br>rheumatology.<br>Conference:<br>american college<br>of<br>rheumatology/ass<br>ociation of<br>rheumatology<br>health<br>professionals<br>annual scientific<br>meeting.<br>ACR/ARHP 2016.<br>United states.<br>Conference start:<br>20161111.<br>Conference<br>end:20161116;<br>68:54-55   | non pertinent |
| 2511 | Hussain et al.,                           | 2016 | Clinical cancer<br>research. 2016;<br>22(13):3192-3200                                                                                                                                                                                                                                                    | non pertinent |
| 2512 | Hurlemann et al.,                         | 2016 | Neuropsychophar<br>macology. 2016;<br>41:333-                                                                                                                                                                                                                                                             | non pertinent |
| 2513 | Hung et al.,                              | 2016 | The lancet.<br>Infectious<br>diseases. 2016;<br>16(2):209-218                                                                                                                                                                                                                                             | non pertinent |
| 2514 | Hughes-Austin et<br>al.,                  | 2016 | Arthritis and<br>rheumatology.<br>Conference:<br>american college<br>of<br>rheumatology/ass<br>ociation of<br>rheumatology<br>health<br>professionals<br>annual scientific<br>meeting.<br>ACR/ARHP 2016.<br>United states.<br>Conference start:<br>20161111.<br>Conference end:<br>20161116. 68:10-<br>11 | non pertinent |
| 2515 | Huang et al.,                             | 2016 | Oral Dis. 2016;<br>22(8):766-774                                                                                                                                                                                                                                                                          | non pertinent |



|      |                        |      |                                                                                                                                        |               |
|------|------------------------|------|----------------------------------------------------------------------------------------------------------------------------------------|---------------|
| 2516 | Hsieh et al.,          | 2016 | PM & r : the j of injury, function, and rehabilitation. 2016; 8(12):1127-1135                                                          | non pertinent |
| 2517 | Hopulele-Petri et al., | 2016 | European neuropsychopharmacology. 2016; 26:416-                                                                                        | non pertinent |
| 2518 | Holmes et al.,         | 2016 | J of pediatrics. 2016; 169:128-134e121                                                                                                 | non pertinent |
| 2519 | Holm et al.,           | 2016 | Eur J Pain. 2016; 20(4):626-638                                                                                                        | non pertinent |
| 2520 | Hofmann et al.,        | 2016 | Palliative medicine. 2016; 30(6):NP 79-NP80                                                                                            | non pertinent |
| 2521 | Hofmann et al.,        | 2016 | J of opioid management. 2016; 12(5):323-331                                                                                            | non pertinent |
| 2522 | Hmamouchi et al.,      | 2016 | Clinical and experimental rheumatology. 2016; 34(3):396-403                                                                            | non pertinent |
| 2523 | Hillila et al.,        | 2016 | Scandinavian j of gastroenterology. 2016; 51(1):16-21                                                                                  | non pertinent |
| 2524 | Hill et al.,           | 2016 | Annals of the rheumatic diseases. 2016; 75(1):23-29                                                                                    | non pertinent |
| 2525 | Higurashi et al.,      | 2016 | The lancet. Oncology. 2016; 17(4):475-483                                                                                              | non pertinent |
| 2526 | Higashikawa et al.,    | 2016 | European j of clinical nutrition. 2016; 70(5):582-587                                                                                  | non pertinent |
| 2527 | Hickey et al.,         | 2016 | Breast cancer research and treatment. 2016; 158(1):79-90                                                                               | non pertinent |
| 2528 | Hickey et al.,         | 2016 | Malaria j. 2016; 15(1)                                                                                                                 | non pertinent |
| 2529 | Hermanowicz et al.,    | 2016 | CNS Drugs. 2016; 30(5):443-454                                                                                                         | non pertinent |
| 2530 | Heo et al.,            | 2016 | Korean J Intern Med. 2016; 31(2):260-266                                                                                               | non pertinent |
| 2531 | Henriquez et al.,      | 2016 | Manual therapy. Conference: IFOMPT 2016 conference. United kingdom. Conference start: 20160704. Conference end: 20160708; 25:e103-e104 | non pertinent |
| 2532 | Henriksen et al.,      | 2016 | Osteoarthritis and cartilage. 2016; 24:437-                                                                                            | non pertinent |

|      |                    |      |                                                                                                     |               |
|------|--------------------|------|-----------------------------------------------------------------------------------------------------|---------------|
| 2533 | Hendren et al.,    | 2016 | J of child and adolescent psychopharmacology. 2016; 26(9):774-783                                   | non pertinent |
| 2534 | Henckens et al.,   | 2016 | Social cognitive and effective neuroscience. 2016; 11(4):663-673                                    | non pertinent |
| 2535 | Heapy et al.,      | 2016 | BMC musculoskeletal disorders. 2016 Feb; 17:85                                                      | non pertinent |
| 2536 | Healey et al.,     | 2016 | BMJ Open. 2016; 6(9)                                                                                | non pertinent |
| 2537 | Hayamizu et al.,   | 2016 | Neuroimage. 2016; 130:175-183                                                                       | non pertinent |
| 2538 | Hassan et al.,     | 2016 | European spine j. 2016; 25(4):1056-1063                                                             | non pertinent |
| 2539 | Hasanpour Dehkordi | 2016 | J Sports Med Phys Fitness. 2016; 56(11):1417-1422                                                   | non pertinent |
| 2540 | Hasanain et al.,   | 2016 | Brazilian j of infectious diseases. 2016; 20(3):250-254                                             | non pertinent |
| 2541 | Hartling et al.,   | 2016 | Clin Psychol Psychother. 2016; 23(6):509-522                                                        | non pertinent |
| 2542 | Harte et al.,      | 2016 | Pain. 2016; 157(9):1933-1945                                                                        | non pertinent |
| 2543 | Harrison et al.,   | 2016 | Alimentary pharmacology & therapeutics. 2016; 44(11-12):1183-1198                                   | non pertinent |
| 2544 | Harris et al.,     | 2016 | JAMS j of acupuncture and meridian studies. 2016; 9(4):346-                                         | non pertinent |
| 2545 | Harrington et al., | 2016 | Oncotargets and therapy. 2016; 9:7081-7093                                                          | non pertinent |
| 2546 | Harbeck et al.,    | 2016 | Annals of oncology : official j of the european society for medical oncology. 2016; 27(6):1047-1054 | non pertinent |
| 2547 | Hanling et al.,    | 2016 | Regional anesthesia and pain medicine. 2016; 41(4):494-500                                          | non pertinent |
| 2548 | Haney et al.,      | 2016 | Neuropsychopharmacology. 2016; 41(8):1974-1982                                                      | non pertinent |
| 2549 | Halvorsen et al.,  | 2016 | Manual therapy. 2016; 25:e72-                                                                       | non pertinent |

|      |                   |      |                                                                                                                                                                                                                                                                      |               |
|------|-------------------|------|----------------------------------------------------------------------------------------------------------------------------------------------------------------------------------------------------------------------------------------------------------------------|---------------|
| 2550 | Hakim et al.,     | 2016 | J Extra Corpor Technol. 2016; 48(4):173-178                                                                                                                                                                                                                          | non pertinent |
| 2551 | Hachulla et al.,  | 2016 | Annals of the rheumatic diseases. 2016; 75(6):1009-1015                                                                                                                                                                                                              | non pertinent |
| 2552 | Habiger et al.,   | 2016 | Behavioural neurology. 2016;7036415                                                                                                                                                                                                                                  | non pertinent |
| 2553 | Gurler et al.,    | 2016 | Minerva stomatologica. 2016; 65(4):207-212                                                                                                                                                                                                                           | non pertinent |
| 2554 | Gupta et al.,     | 2016 | Pain Physician. 2016; 19(6):349-356                                                                                                                                                                                                                                  | non pertinent |
| 2555 | Gu et al.,        | 2016 | Drug design, development and therapy. 2016; 10:1525-1531                                                                                                                                                                                                             | non pertinent |
| 2556 | Grimm et al.,     | 2016 | European neuropsychopharmacology. 2016; 26:218-                                                                                                                                                                                                                      | non pertinent |
| 2557 | Griggs et al.,    | 2016 | Neurology. 2016; 87(20):2123-2131                                                                                                                                                                                                                                    | non pertinent |
| 2558 | Greenway et al.,  | 2016 | Clinical obesity. 2016; 6(5):285-295                                                                                                                                                                                                                                 | non pertinent |
| 2559 | Greenberg et al., | 2016 | PLoS One. 2016; 11(6)                                                                                                                                                                                                                                                | non pertinent |
| 2560 | Gray et al.,      | 2016 | Trials. 2016; 17(1):579                                                                                                                                                                                                                                              | non pertinent |
| 2561 | Gras              | 2016 | Drugs of today (barcelona, spain : 1998). 2016; 52(10):543-550                                                                                                                                                                                                       | non pertinent |
| 2562 | Grant et al.,     | 2016 | Pediatr Crit Care Med. 2016; 17(12):1131-1141                                                                                                                                                                                                                        | non pertinent |
| 2563 | Gozzi et al.,     | 2016 | Neuropsychopharmacology. 2016                                                                                                                                                                                                                                        | non pertinent |
| 2564 | Gowin et al.,     | 2016 | Alcohol Clin Exp Res. 2016; 40(5):979-987                                                                                                                                                                                                                            | non pertinent |
| 2565 | Gowin et al.,     | 2016 | Alcoholism: clinical and experimental research. Conference: 39th annual scientific meeting of the research society on alcoholism. New orleans. LA united states. Conference start: 20160625. Conference end: 20160629. Conference publication (var.pagings); 40:263A | non pertinent |

|      |                   |      |                                                                                                                                                                                                     |               |
|------|-------------------|------|-----------------------------------------------------------------------------------------------------------------------------------------------------------------------------------------------------|---------------|
| 2566 | Gougeon et al.,   | 2016 | Clin J Pain. 2016; 32(3):238-245                                                                                                                                                                    | non pertinent |
| 2567 | Gorka et al.,     | 2016 | Neuropsychopharmacology. 2016; 41(7):1888-1896                                                                                                                                                      | non pertinent |
| 2568 | Goren et al.,     | 2016 | Dermatologic therapy. 2016; 29(3):160-163                                                                                                                                                           | non pertinent |
| 2569 | Gordon et al.,    | 2016 | Annals of emergency medicine. Conference: american college of emergency physicians. ACEP 2016research forum. United states; 68(4 Supplement 1):47-                                                  | non pertinent |
| 2570 | Goossens et al.,  | 2016 | European j of cancer. 2016; 69:9-18                                                                                                                                                                 | non pertinent |
| 2571 | Goody et al.,     | 2016 | International j of radiation oncology biology physics. 2016; 96(5):994-1002                                                                                                                         | non pertinent |
| 2572 | Goncalves et al., | 2016 | J of neurology, neurosurgery and psychiatry. 2016; 87(10):1127-1132                                                                                                                                 | non pertinent |
| 2573 | Gomez et al.,     | 2016 | Lancet oncology. 2016; 17(12):1672-1682                                                                                                                                                             | non pertinent |
| 2574 | Goldwater et al., | 2016 | Clinical pharmacology: advances and applications. 2016; 8:203-212                                                                                                                                   | non pertinent |
| 2575 | Goldstein et al., | 2016 | Neuropsychopharmacology. Confernece: 55th annual meeting of the american college of neuropsychopharmacology. ACNP 2016. United states. Conference start: 20161204. Conference end: 20161208; 41:373 | non pertinent |
| 2576 | Goksen et al.,    | 2016 | Eur J Phys Rehabil Med. 2016; 52(4):431-439                                                                                                                                                         | non pertinent |
| 2577 | Goh et al.,       | 2016 | PLoS medicine. 2016; 13(12)                                                                                                                                                                         | non pertinent |
| 2578 | Goettel et al.,   | 2016 | BMC Anesthesiol. 2016; 16(1):118                                                                                                                                                                    | non pertinent |
| 2579 | Goettel et al.,   | 2016 | Br J Anaesth. 2016; 116(6):811-821                                                                                                                                                                  | non pertinent |

|      |                       |      |                                                                                                                                                                                                                                                                                        |               |
|------|-----------------------|------|----------------------------------------------------------------------------------------------------------------------------------------------------------------------------------------------------------------------------------------------------------------------------------------|---------------|
| 2580 | Glover et al.,        | 2016 | The lancet.<br>Oncology. 2016;<br>17(2):224-233                                                                                                                                                                                                                                        | non pertinent |
| 2581 | Glassman et al.,      | 2016 | Behav Modif.<br>2016; 40(5):748-776                                                                                                                                                                                                                                                    | non pertinent |
| 2582 | Glasser et al.,       | 2016 | J of the peripheral<br>nervous system.<br>2016; 21(3):260-261                                                                                                                                                                                                                          | non pertinent |
| 2583 | Giusti                | 2016 | Annals of the<br>rheumatic<br>diseases. 2016;<br>75:45-                                                                                                                                                                                                                                | non pertinent |
| 2584 | Girish et al.,        | 2016 | Biomedical j.<br>2016; 39(1):72-80                                                                                                                                                                                                                                                     | non pertinent |
| 2585 | Gingnell et al.,      | 2016 | Br J Psychiatry.<br>2016; 209(3):229-235                                                                                                                                                                                                                                               | non pertinent |
| 2586 | Gimbel et al.,        | 2016 | Pain. 2016;<br>157(11):2517-2526                                                                                                                                                                                                                                                       | non pertinent |
| 2587 | Germain et al.,       | 2016 | Sleep. Conference:<br>30th annual<br>meeting of the<br>associated<br>professional sleep<br>societies. LLC,<br>SLEEP 2016.<br>Denver, CO united<br>states. Conference<br>start: 20160611.<br>Conference end:<br>20160615.<br>Conference<br>publication:<br>(var.pagings);<br>39:A96-A97 | non pertinent |
| 2588 | Gerber et al.,        | 2016 | Clinical lung<br>cancer. 2016;<br>17(3):169-176                                                                                                                                                                                                                                        | non pertinent |
| 2589 | Georgopoulos et al.,  | 2016 | European j of<br>internal medicine.<br>2016; 32:84-90                                                                                                                                                                                                                                  | non pertinent |
| 2590 | Gentile et al.,       | 2016 | European j of<br>vascular and<br>endovascular<br>surgery. 2016;<br>52(5):643-649                                                                                                                                                                                                       | non pertinent |
| 2591 | Geiger et al.,        | 2016 | Head & neck.<br>2016; 38(12):1759-1764                                                                                                                                                                                                                                                 | non pertinent |
| 2592 | Geha et al.,          | 2016 | JAMA neurology.<br>2016; 73(6):659-667                                                                                                                                                                                                                                                 | non pertinent |
| 2593 | Gbadeyan et al.,      | 2016 | Brain stimulation.<br>2016; 9(4):545-552                                                                                                                                                                                                                                               | non pertinent |
| 2594 | Garg et al.,          | 2016 | Clinical infectious<br>diseases. 2016;<br>62(3):383-391                                                                                                                                                                                                                                | non pertinent |
| 2595 | Garcia-Manero et al., | 2016 | The lancet.<br>Oncology. 2016;<br>17(4):496-508                                                                                                                                                                                                                                        | non pertinent |

|      |                   |      |                                                                                                     |               |
|------|-------------------|------|-----------------------------------------------------------------------------------------------------|---------------|
| 2596 | Gao et al.,       | 2016 | Brain research. 2016; 1632:73-81                                                                    | non pertinent |
| 2597 | Ganz et al.,      | 2016 | Lancet (london, england). 2016; 387(10021):857-865                                                  | non pertinent |
| 2598 | Ganderton et al., | 2016 | BMC women's health. 2016; 16:32                                                                     | non pertinent |
| 2599 | Gaber et al.,     | 2016 | J of obstetrics and gynaecology research. 2016; 42(12):1773-1781                                    | non pertinent |
| 2600 | Furie et al.,     | 2016 | Lupus science and medicine. 2016; 3(1)                                                              | non pertinent |
| 2601 | Ftouni et al.,    | 2016 | Scottish medical j. 2016; 61(1):NP37-NP38                                                           | non pertinent |
| 2602 | Frijling et al.,  | 2016 | Social cognitive and affective neuroscience. 2016; 11(2):327-336                                    | non pertinent |
| 2603 | Friedland et al., | 2016 | J of acquired immune deficiency syndromes. 2016; 73(5):489-496                                      | non pertinent |
| 2604 | Frick et al.,     | 2016 | Eur neuropsychopharmacol. 2016; 26(11):1775-1783                                                    | non pertinent |
| 2605 | Freeman et al.,   | 2016 | Trials. 2016; 17(1):134                                                                             | non pertinent |
| 2606 | Francis et al.,   | 2016 | Health technology assessment. 2016; 20(19)                                                          | non pertinent |
| 2607 | Fonzo et al.,     | 2016 | Neuropsychopharmacology. 2016; 41:291-292                                                           | non pertinent |
| 2608 | Folprecht et al., | 2016 | Annals of oncology : official j of the european society for medical oncology. 2016; 27(7):1273-1279 | non pertinent |
| 2609 | Flury et al.,     | 2016 | Am J Sports Med. 2016; 44(8):2136-2146                                                              | non pertinent |
| 2610 | Flood et al.,     | 2016 | J of Pain. 2016; 17(5):600-605                                                                      | non pertinent |
| 2611 | Flohr et al.,     | 2016 | J of vascular surgery. 2016; 63(2):399-406                                                          | non pertinent |
| 2612 | Fiteni et al.,    | 2016 | The european respiratory j. 2016; 48(3):861-872                                                     | non pertinent |
| 2613 | Firouzian et al., | 2016 | American j of emergency medicine. 2016; 34(3):443-448                                               | non pertinent |

|      |                      |      |                                                                       |               |
|------|----------------------|------|-----------------------------------------------------------------------|---------------|
| 2614 | Findling et al.,     | 2016 | Pediatric drugs. 2016; 18(5):367-378                                  | non pertinent |
| 2615 | Fernández et al.,    | 2016 | Clinical infectious diseases. 2016; 62(5):568-573                     | non pertinent |
| 2616 | Fenton et al.,       | 2016 | JAMA Intern Med. 2016; 176(2):191-197                                 | non pertinent |
| 2617 | Feliu-Soler et al.,  | 2016 | BMC Complement Altern Med. 2016;                                      | non pertinent |
| 2618 | Fehrenbacher et al., | 2016 | Lancet (london, england). 2016; 387(10030):1837-1846                  | non pertinent |
| 2619 | Falsini et al.,      | 2016 | J of translational medicine. 2016; 14(1)                              | non pertinent |
| 2620 | Fallon et al.,       | 2016 | J of clinical oncology. 2016; 34(6):550-556                           | non pertinent |
| 2621 | Falcone et al.,      | 2016 | Brain stimulation. 2016; 9(2):191-196                                 | non pertinent |
| 2622 | Fagotti et al.,      | 2016 | European j of cancer (Oxford, England : 1990). 2016; 59:22-3          | non pertinent |
| 2623 | Fabrizi et al.,      | 2016 | Sci Rep. 2016; 6:28642                                                | non pertinent |
| 2624 | Fabbri et al.,       | 2016 | Respiratory research. 2016; 17(1)                                     | non pertinent |
| 2625 | Euctr – N.L.         | 2016 | EU Clinical Trial Register. 2016                                      | non pertinent |
| 2626 | Euctr – E.S.         | 2016 | EU Clinical Trial Register. 2016                                      | non pertinent |
| 2627 | Euctr – E.S.         | 2016 | EU Clinical Trial Register. 2016                                      | non pertinent |
| 2628 | Euctr – D.E.         | 2016 | EU Clinical Trial Register. 2016                                      | non pertinent |
| 2629 | Euctr – D.E.         | 2016 | EU Clinical Trial Register. 2016                                      | non pertinent |
| 2630 | Estepa et al.,       | 2016 | Psycho-oncology. 2016; 25:130-131                                     | non pertinent |
| 2631 | English et al.,      | 2016 | Archives of physical medicine and rehabilitation. 2016; 97(2):273-280 | non pertinent |
| 2632 | Engel et al.,        | 2016 | United european gastroenterology j. 2016; 4(5):A618-                  | non pertinent |
| 2633 | Ellis et al.,        | 2016 | Annals of allergy, asthma and immunology. 2016; 117(3):310-317        | non pertinent |
| 2634 | Ellingsrud et al.,   | 2016 | International j of cardiology. 2016; 202:870-873                      | non pertinent |
| 2635 | Ellegaard et al.,    | 2016 | Arthritis research & therapy. 2016; 18(1)                             | non pertinent |

|      |                     |      |                                                                                                                                                                                                                     |               |
|------|---------------------|------|---------------------------------------------------------------------------------------------------------------------------------------------------------------------------------------------------------------------|---------------|
| 2636 | El-Karakasy et al., | 2016 | J of interferon & cytokine research. 2016; 36(1):1-8                                                                                                                                                                | non pertinent |
| 2637 | Eisenried et al.,   | 2016 | Anesthesia and analgesia. Conference: 2016 annual meeting of the international anesthesia research society. IARS 2016. United states. Conference start: 20160321. Conference end: 20160324; 122(5 Supplement 3):347 | non pertinent |
| 2638 | Eigentler et al.,   | 2016 | Annals of oncology. 2016; 27(8):1625-1632                                                                                                                                                                           | non pertinent |
| 2639 | Edwards et al.,     | 2016 | Pain medicine (Malden, Mass). 2016; 17(10):1882-1891                                                                                                                                                                | non pertinent |
| 2640 | Eckstein et al.,    | 2016 | Neuropsychopharmacology. 2016; 41(4):932-939                                                                                                                                                                        | non pertinent |
| 2641 | Eaton et al.,       | 2016 | Annals of surgical oncology. 2016; 23(7):2137-2145                                                                                                                                                                  | non pertinent |
| 2642 | Dymond et al.,      | 2016 | Clinical therapeutics. 2016; 38(11):2447-2458                                                                                                                                                                       | non pertinent |
| 2643 | Duval et al.,       | 2016 | Sci Rep. 2016; 6:22542                                                                                                                                                                                              | non pertinent |
| 2644 | Durgam et al.,      | 2016 | International clinical psychopharmacology. 2016; 31(2):61-68                                                                                                                                                        | non pertinent |
| 2645 | Ducreux et al.,     | 2016 | Annals of oncology. Conference: 41st european society for medical oncology congress, ESMO 2016. Denmark. Conference start: 20161007. Conference end: 20161011; 27                                                   | non pertinent |



|      |                           |      |                                                                                                                                                                                                    |               |
|------|---------------------------|------|----------------------------------------------------------------------------------------------------------------------------------------------------------------------------------------------------|---------------|
|      |                           |      | Blood.<br>Conference: 58th<br>annual meeting of<br>the american<br>society of<br>hematology. ASH<br>2016. United<br>states. Conference<br>start: 20161203.<br>Conference end:<br>20161206; 128(22) |               |
| 2646 | Drummond et al.,          | 2016 |                                                                                                                                                                                                    | non pertinent |
| 2647 | Drks - Bethge             | 2016 | Deutsches<br>Register<br>Klinischer Studien<br>- DRKS. 2016                                                                                                                                        | non pertinent |
| 2648 | Drks - Cabanel            | 2016 | Deutsches<br>Register<br>Klinischer Studien<br>- DRKS. 2016                                                                                                                                        | non pertinent |
| 2649 | Drks - Feirreira de<br>Sá | 2016 | Deutsches<br>Register<br>Klinischer Studien<br>- DRKS. 2016                                                                                                                                        | non pertinent |
| 2650 | Drks - Magerl             | 2016 | Deutsches<br>Register<br>Klinischer Studien<br>- DRKS. 2016                                                                                                                                        | non pertinent |
| 2651 | Drks - Kinfe              | 2016 | Deutsches<br>Register<br>Klinischer Studien<br>- DRKS. 2016                                                                                                                                        | non pertinent |
| 2652 | Drks - Meissner           | 2016 | Deutsches<br>Register<br>Klinischer Studien<br>- DRKS. 2016                                                                                                                                        | non pertinent |
| 2653 | Driessen et al.,          | 2016 | European j of<br>cancer (Oxford,<br>England : 1990).<br>2016; 52:77-84                                                                                                                             | non pertinent |
| 2654 | Draper-Rodi et al.,       | 2016 | Manual therapy.<br>2016; 25:e167-<br>e168                                                                                                                                                          | non pertinent |
| 2655 | Downs-Canner et<br>al.,   | 2016 | Molecular<br>therapy. 2016;<br>24(8):1492-1501                                                                                                                                                     | non pertinent |
| 2656 | Dou et al.,               | 2016 | Medicine<br>(Baltimore). 2016;<br>95(42):e5193                                                                                                                                                     | non pertinent |
| 2657 | Dolder et al.,            | 2016 | Neuropsychophar<br>macology. 2016;<br>41(11):2638-2646                                                                                                                                             | non pertinent |
| 2658 | Ding et al.,              | 2016 | Osteoarthritis and<br>cartilage. 2016;<br>24:49-                                                                                                                                                   | non pertinent |
| 2659 | Dimopoulos et al.,        | 2016 | Lancet oncology.<br>2016; 17(1):27-38                                                                                                                                                              | non pertinent |
| 2660 | Dicko et al.,             | 2016 | The lancet.<br>Infectious<br>diseases. 2016;<br>16(6):674-684                                                                                                                                      | non pertinent |
| 2661 | Diaz-Piedra et al.,       | 2016 | Brain Imaging<br>Behav. 2016;<br>10(4):1184-1197                                                                                                                                                   | non pertinent |

|      |                     |      |                                                                                         |               |
|------|---------------------|------|-----------------------------------------------------------------------------------------|---------------|
| 2662 | Di Stefano et al.,  | 2016 | Digestive and liver disease. 2016; 48:e92                                               | non pertinent |
| 2663 | Di Pierro et al.,   | 2016 | Acta bio-medica. 2016; 87(3):259-265                                                    | non pertinent |
| 2664 | Deterding et al.,   | 2016 | Lancet infectious diseases. 2016                                                        | non pertinent |
| 2665 | Desai et al.,       | 2016 | Zeitschrift für Kinderchirurgie (Surgery in infancy and childhood). 2016; 26(2):160-163 | non pertinent |
| 2666 | Deppermann et al.,  | 2016 | Behav Brain Res. 2016; 307:208-217                                                      | non pertinent |
| 2667 | Deplanque et al.,   | 2016 | J of the American Academy of Dermatology. 2016; 74(6):1077-1085                         | non pertinent |
| 2668 | Deogaonkar et al.,  | 2016 | Neuromodulation. 2016; 19(2):142-153                                                    | non pertinent |
| 2669 | Denis et al.,       | 2016 | Eur J Pain. 2016; 20(5):800-810                                                         | non pertinent |
| 2670 | Dempster et al.,    | 2016 | J of bone and mineral research. 2016; 31(7):1429-1439                                   | non pertinent |
| 2671 | Delgado et al.,     | 2016 | Pediatrics. 2016; 137(2)                                                                | non pertinent |
| 2672 | Dedic et al.,       | 2016 | J of the American College of Cardiology. 2016; 67(1):16-26                              | non pertinent |
| 2673 | De Wit et al.,      | 2016 | J of internal medicine. 2016; 279(3):283-292                                            | non pertinent |
| 2674 | De Souza et al.,    | 2016 | Menopause (New York, N.Y.). 2016; 23(11):1252-1256                                      | non pertinent |
| 2675 | De Santis et al.,   | 2016 | The lancet. Infectious diseases. 2016; 16(3):311-320                                    | non pertinent |
| 2676 | De Ridder et al.,   | 2016 | Neuromodulation. 2016; 19(1):47-59                                                      | non pertinent |
| 2677 | De Neve et al.,     | 2016 | Radiotherapy and oncology. 2016; 119:246-247                                            | non pertinent |
| 2678 | De Mey et al.,      | 2016 | Drug research. 2016; 66(7):384-392                                                      | non pertinent |
| 2679 | De Looze et al.,    | 2016 | European j of general practice. 2016; 22(2):111-118                                     | non pertinent |
| 2680 | De la Torre et al., | 2016 | The lancet. Neurology. 2016; 15(8):801-810                                              | non pertinent |
| 2681 | De lure et al.,     | 2016 | Injury. 2016; 47:44-48                                                                  | non pertinent |

|      |                                      |      |                                                                             |               |
|------|--------------------------------------|------|-----------------------------------------------------------------------------|---------------|
| 2682 | De Greef, B.T.A.,<br>Merkies et al., | 2016 | Trials. 2016; 17(1)                                                         | non pertinent |
| 2683 | De Greef, B.T.A.,<br>Geerts et al.,  | 2016 | Trials. 2016; 17(1)                                                         | non pertinent |
| 2684 | De Francesco et<br>al.,              | 2016 | J of<br>gastrointestinal<br>and liver diseases.<br>2016; 25(2):147-<br>150  | non pertinent |
| 2685 | Dawson et al.,                       | 2016 | Stroke: a j of<br>cerebral<br>circulation. 2016;<br>47(1):143-150           | non pertinent |
| 2686 | Davis et al.,                        | 2016 | J of pediatrics.<br>2016; 172:136-<br>141e131                               | non pertinent |
| 2687 | Das et al.,                          | 2016 | Saudi j of<br>gastroenterology.<br>2016; 22(4):309-<br>315                  | non pertinent |
| 2688 | Das Nair et al.,                     | 2016 | Trials. 2016; 17:54                                                         | non pertinent |
| 2689 | Das et al.,                          | 2016 | J of opioid<br>management.<br>2016; 12(6):421-<br>430                       | non pertinent |
| 2690 | Darnall et al.,                      | 2016 | Pain Med. 2016;<br>17(2):250-263                                            | non pertinent |
| 2691 | Dancey et al.,                       | 2016 | Pain. 2016;<br>157(8):1682-1695                                             | non pertinent |
| 2692 | Curran et al.,                       | 2016 | Trials. 2016; 17(1)                                                         | non pertinent |
| 2693 | Curigliano et al.,                   | 2016 | Breast (edinburgh,<br>scotland). 2016;<br>28:191-198                        | non pertinent |
| 2694 | Ctrl – Wakankar                      | 2016 | Clinical Trials<br>Registry – India.<br>2016                                | non pertinent |
| 2695 | Ctrl - Deolekar                      | 2016 | Clinical Trials<br>Registry – India.<br>2016                                | non pertinent |
| 2696 | Cristofanilli et al.,                | 2016 | The lancet.<br>Oncology. 2016;<br>17(4):425-439                             | non pertinent |
| 2697 | Couturier et al.,                    | 2016 | Revue de<br>medecine interne.<br>2016; 37(12):834-<br>839                   | non pertinent |
| 2698 | Couture et al.,                      | 2016 | AANA j. 2016;<br>84(3):159-165                                              | non pertinent |
| 2699 | Cote et al.,                         | 2016 | Annals of otology,<br>rhinology and<br>laryngology. 2016;<br>125(4):317-324 | non pertinent |
| 2700 | Cosme et al.,                        | 2016 | Helicobacter.<br>2016; 21(1):29-34                                          | non pertinent |
| 2701 | Correll et al.,                      | 2016 | J of clincial<br>psychiatry. 2016;<br>77:3-24                               | non pertinent |

|      |                      |      |                                                                                |               |
|------|----------------------|------|--------------------------------------------------------------------------------|---------------|
| 2702 | Cornpropst et al.,   | 2016 | Allergy: european j of allergy and clinical immunology. 2016; 71(12):1676-1683 | non pertinent |
| 2703 | Coriat et al.,       | 2016 | International j of nanomedicine. 2016; 11:6207-6216                            | non pertinent |
| 2704 | Conaghan et al.,     | 2016 | Annals of the rheumatic diseases. 2016; 75(6):1024-1033                        | non pertinent |
| 2705 | Comninou et al.,     | 2016 | Endocrine reviews. 2016; 37(2)                                                 | non pertinent |
| 2706 | Colonnello et al.,   | 2016 | Psychoneuroendocrinology. 2016; 68:69-73                                       | non pertinent |
| 2707 | Colloca et al.,      | 2016 | Biological psychiatry. 2016; 79(10):794-802                                    | non pertinent |
| 2708 | Colletti et al.,     | 2016 | Therapeutics and clinical risk management. 2016; 12:1365-1376                  | non pertinent |
| 2709 | Collett et al.,      | 2016 | American j of cardiovascular drugs. 2016; 16(1):43-53                          | non pertinent |
| 2710 | Clive et al.,        | 2016 | The lancet oncology. 2016; 17(8):1094-1104                                     | non pertinent |
| 2711 | Clark et al.,        | 2016 | Cardiovascular and interventional radiology. 2016; 39(3):124-125               | non pertinent |
| 2712 | Chuah et al.,        | 2016 | Medicine (united states). 2016; 95(19)                                         | non pertinent |
| 2713 | Choi et al.,         | 2016 | American j of preventive medicine. 2016; 51(5 Supplement 3):743-751            | non pertinent |
| 2714 | Cho et al.,          | 2016 | Joint, bone, spine. 2016; 83(3):324-329                                        | non pertinent |
| 2715 | Chi, Ctr Ior - Zhifu | 2016 | Chinese Clinical Trial Registry – ChCTR. 2016                                  | non pertinent |
| 2716 | Chi, Ctr Inr – Sun   | 2016 | Chinese Clinical Trial Registry – ChCTR. 2016                                  | non pertinent |
| 2717 | Chi, Ctr Ior - Huang | 2016 | Chinese Clinical Trial Registry – ChCTR. 2016                                  | non pertinent |
| 2718 | Chi, Ctr Inr - Chen  | 2016 | Chinese Clinical Trial Registry – ChCTR. 2016                                  | non pertinent |

|      |                        |      |                                                                                                                                                                                                                                        |               |
|------|------------------------|------|----------------------------------------------------------------------------------------------------------------------------------------------------------------------------------------------------------------------------------------|---------------|
| 2719 | Chhabra et al,         | 2016 | International j of oral and maxillofacial surgery. 2016; 45(12):1644-1651                                                                                                                                                              | non pertinent |
| 2720 | Cheng et al.,          | 2016 | Hepatology. 2016; (baltimore, md). 2016; 64(3):774-784                                                                                                                                                                                 | non pertinent |
| 2721 | Chen et al,            | 2016 | Acta pharmacologica sinica. 2016; 37(11):1509-1515                                                                                                                                                                                     | non pertinent |
| 2722 | Chen et al,            | 2016 | J Orthop Surg Res. 2016; 11(1):47                                                                                                                                                                                                      | non pertinent |
| 2723 | Chen et al,            | 2016 | Medicine (Baltimore). 2016; 95(2):e2292                                                                                                                                                                                                | non pertinent |
| 2724 | Chan et al,            | 2016 | Sleep. Conference: 30th annual meeting of the associated professional sleep societies. LLC, SLEEP 2016. Denver, CO united states. Conference start: 20160611. Conference end: 20160615. Conference publication: (var.pagings); 39:A205 | non pertinent |
| 2725 | Chan et al,            | 2016 | The lancet. Oncology. 2016; 17(3):367-377                                                                                                                                                                                              | non pertinent |
| 2726 | Chalkiadis et al,      | 2016 | Developmental medicine and child neurology. 2016; 58(4):402-408                                                                                                                                                                        | non pertinent |
| 2727 | Cerezo-Téliez et al.,  | 2016 | Pain. 2016; 157(9):1905-1917                                                                                                                                                                                                           | non pertinent |
| 2728 | Cavelti-Weder et al.,  | 2016 | Molecular therapy. 2016; 24(5):1003-1012                                                                                                                                                                                               | non pertinent |
| 2729 | Castro-Marrero et al., | 2016 | Clinical nutrition (edinburgh, scotland). 2016; 35(4):826-834                                                                                                                                                                          | non pertinent |
| 2730 | Caserini et al,        | 2016 | International j of clinical pharmacology and therapeutics. 2016; 54(1):19-27                                                                                                                                                           | non pertinent |
| 2731 | Case et al,            | 2016 | Eneuro. 2016; 3(1):1312-1327                                                                                                                                                                                                           | non pertinent |
| 2732 | Cardenas et al,        | 2016 | Revista colombiana de psiquiatria. 2016                                                                                                                                                                                                | non pertinent |

|      |                     |      |                                                                                                                                                                                                            |               |
|------|---------------------|------|------------------------------------------------------------------------------------------------------------------------------------------------------------------------------------------------------------|---------------|
| 2733 | Cao et al.,         | 2016 | Clinical pharmacology in drug development. 2016; 5(6):435-449                                                                                                                                              | non pertinent |
| 2734 | Campbell et al.,    | 2016 | Pain. 2016; 157(6):1297-1304                                                                                                                                                                               | non pertinent |
| 2735 | Caltagirone et al., | 2016 | Transl Stroke Res. 2016; 7(1):54-69                                                                                                                                                                        | non pertinent |
| 2736 | Callegari et al.,   | 2016 | Cardiology in the young. Conference: 50th annual meeting of the association for european paediatric and congenital cardiology, AEPC. Italy. Conference start: 20160601. Conference end: 20160604; 26:42-43 | non pertinent |
| 2737 | Buvanendran et al., | 2016 | Regional anesthesia and pain medicine. 2016; 41(5)                                                                                                                                                         | non pertinent |
| 2738 | Butler et al.,      | 2016 | Endocrine reviews. 2016; 37(2)                                                                                                                                                                             | non pertinent |
| 2739 | Burke et al.,       | 2016 | Clinical lymphoma, myeloma & leukemia. 2016; 16(4):182-190.e181                                                                                                                                            | non pertinent |
| 2740 | Burhan et al.,      | 2016 | Behavioural neurology. 2016:1637392                                                                                                                                                                        | non pertinent |
| 2741 | Bunge et al.,       | 2016 | J of acquired immune deficiency syndromes (1999). 2016; 71(5)                                                                                                                                              | non pertinent |
| 2742 | Buerkle et al.,     | 2016 | Haematologica. 2016; 101:61-                                                                                                                                                                               | non pertinent |
| 2743 | Buerkle et al.,     | 2016 | Haematologica. 2016; 101:146-147                                                                                                                                                                           | non pertinent |
| 2744 | Buckley             | 2016 | Irish j of medical science. 2016; 185(3):561-564                                                                                                                                                           | non pertinent |
| 2745 | Bschleipfer et al., | 2016 | European surgery – acta chirurgica austriaca. 2016; 48(3):211-213                                                                                                                                          | non pertinent |
| 2746 | Bruce et al.,       | 2016 | Neurology. 2016; 87(18):1871-1877                                                                                                                                                                          | non pertinent |
| 2747 | Brown et al.,       | 2016 | PLoS One. 2016; 11(5)                                                                                                                                                                                      | non pertinent |

|      |                     |      |                                                                                                                                  |               |
|------|---------------------|------|----------------------------------------------------------------------------------------------------------------------------------|---------------|
| 2748 | Brouwers et al.,    | 2016 | Oncotarget. 2016; 7(21):29977-29988                                                                                              | non pertinent |
| 2749 | Brose et al.,       | 2016 | Lancet oncology. 2016; 17(9):1272-1282                                                                                           | non pertinent |
| 2750 | Brinkhuizen et al., | 2016 | J of the American Academy of Dermatology. 2016; 75(1):126-134                                                                    | non pertinent |
| 2751 | Brietzke et al.,    | 2016 | Frontiers in neuroscience. 2016; 9(JAN)                                                                                          | non pertinent |
| 2752 | Bridgewater et al., | 2016 | BMC Cancer. 2016; 16(1)                                                                                                          | non pertinent |
| 2753 | Bray et al.,        | 2016 | J of traumatic stress. 2016; 29(4):340-348                                                                                       | non pertinent |
| 2754 | Braden et al.,      | 2016 | Brain and behavior. 2016; 6(3):1-13                                                                                              | non pertinent |
| 2755 | Broye et al.,       | 2016 | Clinical lung cancer. 2016; 17(2):150-160                                                                                        | non pertinent |
| 2756 | Boyce et al.,       | 2016 | British j of pharmacology. 2016; 173(10):1580-1588                                                                               | non pertinent |
| 2757 | Bourcier et al.,    | 2016 | Annals of intensive care. 2016; 6(1)                                                                                             | non pertinent |
| 2758 | Borlak et al.,      | 2016 | Oncotarget. 2016; 7(19):28059-28074                                                                                              | non pertinent |
| 2759 | Bonani et al.,      | 2016 | American j of transplantation. 2016; 16(6):1882-1891                                                                             | non pertinent |
| 2760 | Boku et al.,        | 2016 | Revista brasileira de anesthesiologia. 2016; 66(1):37-43                                                                         | non pertinent |
| 2761 | Bois et al.,        | 2016 | Lancet oncology. 2016; 17(1):78-89                                                                                               | non pertinent |
| 2762 | Blom et al.,        | 2016 | Clinical cardiology. Conference: 2016 congress on atherosclerotic cardiovascular disease prevention. United states. 2016; 39:5-6 | non pertinent |
| 2763 | Bloch et al.,       | 2016 | J of child and adolescent psychopharmacology. 2016; 26(4):327-334                                                                | non pertinent |
| 2764 | Blikman et al.,     | 2016 | BMJ Open. 2016; 6(3)                                                                                                             | non pertinent |
| 2765 | Blackhall et al.,   | 2016 | Annals of oncology. 2016; 27:iii35-iii41                                                                                         | non pertinent |

|      |                         |      |                                                                     |               |
|------|-------------------------|------|---------------------------------------------------------------------|---------------|
| 2766 | Binder et al.,          | 2016 | Pain management. 2016; 6(3):229-229                                 | non pertinent |
| 2767 | Bilhim                  | 2016 | Cardiovascular and interventional radiology. 2016; 39(3):64-65      | non pertinent |
| 2768 | Bhatnager               | 2016 | Supportive care in cancer. 2016; 24(1):29-30                        | non pertinent |
| 2769 | Bhandari et al.,        | 2016 | Clinical orthopaedics and related research. 2016; 474(5):1234-1244  | non pertinent |
| 2770 | Betsy et al.,           | 2016 | Photodiagnosis and photodynamic therapy. 2016; 14:84-90             | non pertinent |
| 2771 | Bernabe-Garcia et al.,  | 2016 | Annals of nutrition & metabolism. 2016; 69(2):150-160               | non pertinent |
| 2772 | Bermudez-Millan et al., | 2016 | J Nutr. 2016; 146(10):2051-2057                                     | non pertinent |
| 2773 | Bergfeld et al.,        | 2016 | JAMA Psychiatry. 2016; 73(5):456-464                                | non pertinent |
| 2774 | Bergeron et al.,        | 2016 | J of consulting and clinical psychology. 2016; 84(3):259-268        | non pertinent |
| 2775 | Benes et al.,           | 2016 | Gastroenterologie a hepatologie. 2016; 70(6):491-499                | non pertinent |
| 2776 | Benedetti et al.,       | 2016 | J of physiology. 2016; 594(19):5647-5660                            | non pertinent |
| 2777 | Ben-Ami et al.,         | 2016 | Annals of oncology. 2016; 27(9):1794-1799                           | non pertinent |
| 2778 | Bell et al.,            | 2016 | Current medical research and opinion. 2016; 32(5):959-965           | non pertinent |
| 2779 | Behre et al.,           | 2016 | J of clinical endocrinology and metabolism. 2016; 101(12):4779-4788 | non pertinent |



|      |                      |      |                                                                                                                                                                                                                                                                                                             |               |
|------|----------------------|------|-------------------------------------------------------------------------------------------------------------------------------------------------------------------------------------------------------------------------------------------------------------------------------------------------------------|---------------|
|      |                      |      | Arthritis and<br>rheumatology.<br>Conference:<br>american college<br>of<br>rheumatology/ass<br>ociation of<br>rheumatology<br>health<br>professionals<br>annual scientific<br>meeting.<br>ACR/ARHP 2016.<br>United states.<br>Conference start:<br>20161111.<br>Conference end:<br>20161116; 68:957-<br>958 |               |
| 2780 | Batticciotto et al., | 2016 |                                                                                                                                                                                                                                                                                                             | non pertinent |
| 2781 | Bart et al.,         | 2016 | Medicine (united<br>states). 2016;<br>95(3)<br>Pain practice.<br>2016; 16(7):856-<br>868                                                                                                                                                                                                                    | non pertinent |
| 2782 | Barrett et al.,      | 2016 | The lancet.<br>Infectious<br>diseases. 2016;<br>16(4):421-430                                                                                                                                                                                                                                               | non pertinent |
| 2783 | Barrera et al.,      | 2016 | Anesthesia and<br>Analgesia. 2016;<br>122(4):986-995                                                                                                                                                                                                                                                        | non pertinent |
| 2784 | Barrachina et al.,   | 2016 | Gut. 2016;<br>65(1):82-90                                                                                                                                                                                                                                                                                   | non pertinent |
| 2785 | Barbara et al.,      | 2016 | Arch Phys Med<br>Rehabil. 2016;<br>97(8):1254-1261                                                                                                                                                                                                                                                          | non pertinent |
| 2786 | Banks et al.,        | 2016 | Current<br>therapeutic<br>research clinical<br>and experimental.<br>2016; 78:1-7                                                                                                                                                                                                                            | non pertinent |
| 2787 | Balius et al.,       | 2016 | Eur Heart J. 2016;<br>37(19):1504-1513                                                                                                                                                                                                                                                                      | non pertinent |
| 2788 | Bairey et al.,       | 2016 | Clinical<br>therapeutics.<br>2016; 38(2):358-<br>369                                                                                                                                                                                                                                                        | non pertinent |
| 2789 | Bai et al.,          | 2016 | Neuropsychophar<br>macology.<br>Conference: 55th<br>annual meeting of<br>the american<br>college of<br>neuropsychophar<br>macology, ACNP<br>2016. United<br>states. Conference<br>start: 20161204.<br>Conference end:<br>20161208; 41:464                                                                   | non pertinent |
| 2790 | Badran et al.,       | 2016 | Addiction biology.<br>2016; 21(1):146-<br>158                                                                                                                                                                                                                                                               | non pertinent |
| 2791 | Babalonis et al.,    | 2016 |                                                                                                                                                                                                                                                                                                             |               |

|      |                         |      |                                                                                                                                                               |               |
|------|-------------------------|------|---------------------------------------------------------------------------------------------------------------------------------------------------------------|---------------|
|      |                         |      | Blood.                                                                                                                                                        |               |
|      |                         |      | Conference: 58th annual meeting of the american society of hematology, ASH 2016. United states. Conference start: 20161203. Conference end: 20161206; 128(22) |               |
| 2792 | Aydinok et al.,         | 2016 |                                                                                                                                                               | non pertinent |
| 2793 | Ayache et al.,          | 2016 | Frontiers in neuroscience. 2016; 10(APR) F1000research. 2016; 5                                                                                               | non pertinent |
| 2794 | Ather et al.,           | 2016 |                                                                                                                                                               | non pertinent |
| 2795 | Assouline et al.,       | 2016 | Blood. 2016; 128(2):185-194                                                                                                                                   | non pertinent |
| 2796 | Assem et al.,           | 2016 | Hepatology international. 2016; 10(2):377-385                                                                                                                 | non pertinent |
| 2797 | Arzola-Paniagua et al., | 2016 | Obesity (silver spring, md.). 2016; 24(7):1454-1463                                                                                                           | non pertinent |
| 2798 | Armstrong et al.,       | 2016 | Lancet (london, england). 2016; 387(10019):679-690                                                                                                            | non pertinent |
| 2799 | Armstrong et al.,       | 2016 | The lancet. Oncology. 2016; 17(3):378-388                                                                                                                     | non pertinent |
| 2800 | Armand et al.,          | 2016 | British j of haematology. 2016; 173(1):96-104                                                                                                                 | non pertinent |
| 2801 | Arjadi et al.,          | 2016 | Trials. 2016; 17(1)                                                                                                                                           | non pertinent |
| 2802 | Argoff et al.,          | 2016 | Clin J Pain. 2016; 32(7):555-561                                                                                                                              | non pertinent |
| 2803 | Arendt-Nielsen et al.,  | 2016 | Pain. 2016; 157(9):2057-2067                                                                                                                                  | non pertinent |
| 2804 | Arden et al.,           | 2016 | Osteoarthritis and cartilage. 2016; 24(11):1858-1866                                                                                                          | non pertinent |
| 2805 | Aragones et al.,        | 2016 | BMC Psychiatry. 2016; 16(1)                                                                                                                                   | non pertinent |
| 2806 | Apostolopoulos et al.,  | 2016 | Scandinavian j of gastroenterology. 2016; 51(2):145-151                                                                                                       | non pertinent |
| 2807 | Anonymous               | 2016 | Lancet. 2016; 388(10043):464                                                                                                                                  | non pertinent |
| 2808 | Anonymous               | 2016 | Frontiers in computational neuroscience. 2016; 19(DEC)                                                                                                        | non pertinent |
| 2809 | Angiolillo et al.,      | 2016 | J of the American College of Cardiology. 2016; 67(6):603-613                                                                                                  | non pertinent |
| 2810 | Andresen et al.,        | 2016 | Pain. 157(9):2097-2103                                                                                                                                        | non pertinent |

|      |                    |      |                                                                 |               |
|------|--------------------|------|-----------------------------------------------------------------|---------------|
| 2811 | Andersson et al.,  | 2016 | Human reproduction (Oxford, England). 2016; 31(1):67-74         | non pertinent |
| 2812 | An et al.,         | 2016 | Endocrine j. 2016; 63(10):885-895                               | non pertinent |
| 2813 | Almallah et al.,   | 2016 | J of clinical and diagnostic research. 2016; 10(11):ZC23-ZC28   | non pertinent |
| 2814 | Allison et al.,    | 2016 | J of neuroinflammation. 2016; 13(1)                             | non pertinent |
| 2815 | Alexander et al.,  | 2016 | J of clinical oncology. 2016; 34(34):4094-4101                  | non pertinent |
| 2816 | Albu et al.,       | 2016 | Int J Psychophysiol. 2016; 109:147-152                          | non pertinent |
| 2817 | Al-Motowa et al.,  | 2016 | Middle east african j of ophthalmology. 2016; 23(4):307-310     | non pertinent |
| 2818 | Al-Batran et al.,  | 2016 | Lancet oncology. 2016; 17(12):1697-1708                         | non pertinent |
| 2819 | Akural et al.,     | 2016 | Scandinavian j of pain. 2016; 11:59-64                          | non pertinent |
| 2820 | Akeju et al.,      | 2016 | PLoS One. 2016; 11(10):e0163431                                 | non pertinent |
| 2821 | Ahn et al.,        | 2016 | J of the American College of Cardiology. 2016; 67(12):1412-1422 | non pertinent |
| 2822 | Ahn et al.,        | 2016 | Clinics in orthopedic surgery. 2016; 8(1):78-83                 | non pertinent |
| 2823 | Ahmad et al.,      | 2016 | J of nuclear cardiology. 2016; 23(2):287-297                    | non pertinent |
| 2824 | Addy et al.,       | 2016 | Clinical pharmacology in drug development. 2016; 5(5):374-382   | non pertinent |
| 2825 | Actrn – Hart       | 2016 | ANZCTR – Australian New Zealand Clinical Trials Registry. 2016  | non pertinent |
| 2826 | Actrn – Fitzgibbon | 2016 | ANZCTR – Australian New Zealand Clinical Trials Registry. 2016  | non pertinent |

|      |                     |      |                                                                                                                                                                      |               |
|------|---------------------|------|----------------------------------------------------------------------------------------------------------------------------------------------------------------------|---------------|
| 2827 | Actrn – Nordin      | 2016 | ANZCTR – Australian New Zealand Clinical Trials Registry. 2016                                                                                                       | non pertinent |
| 2828 | Actrn – Kim         | 2016 | ANZCTR – Australian New Zealand Clinical Trials Registry. 2016                                                                                                       | non pertinent |
| 2829 | Actrn – Knaevelsrud | 2016 | ANZCTR – Australian New Zealand Clinical Trials Registry. 2016                                                                                                       | non pertinent |
| 2830 | Actrn – Halaki      | 2016 | ANZCTR – Australian New Zealand Clinical Trials Registry. 2016                                                                                                       | non pertinent |
| 2831 | Acosta et al.,      | 2016 | J of neurogastroenterology and motility. 2016; 22(1):69-77                                                                                                           | non pertinent |
| 2832 | Abonour et al.,     | 2016 | Blood. Conference: 58th annual meeting of the american society of hematology. ASH 2016. United states. Conference start: 20161203. Conference end: 20161206; 128(22) | non pertinent |
| 2833 | Abend et al.,       | 2016 | Transl Psychiatry. 2016; 6(10):e913                                                                                                                                  | non pertinent |
| 2834 | Abdulatif et al.,   | 2016 | Anaesthesia. 2016; 71(10):1177-1185                                                                                                                                  | non pertinent |
| 2835 | Abdelmagied et al., | 2016 | Am J Obstet Gynecol. 2016; 215(3):388.e318                                                                                                                           | non pertinent |
| 2836 | Abdel-Kadar et al., | 2016 | Obesity surgery. 2016; 26(12):2899-2905                                                                                                                              | non pertinent |
| 2837 | Abdallah et al.,    | 2016 | Anesthesiology. 2016; 124(5):1053-1064                                                                                                                               | non pertinent |
| 2838 | Sugiyama et al.,    | 2016 | J of clinical oncology. 2016 Aug; 34(24):2881-2887                                                                                                                   | non pertinent |
| 2839 | Poiley et al.,      | 2016 | Arthritis and rheumatology. 2016 Aug; 68(8):2027-2034                                                                                                                | non pertinent |
| 2840 | Hodge et al.,       | 2016 | PLoS One. 2016 Apr; 11(4):e0153151                                                                                                                                   | non pertinent |
| 2841 | Reck et al.,        | 2016 | J of thoracic oncology. 2016; 11(6):808-818                                                                                                                          | non pertinent |

|      |                   |      |                                                                                  |               |
|------|-------------------|------|----------------------------------------------------------------------------------|---------------|
| 2842 | Kiru et al.,      | 2016 | Health technology assessment. 2016 Aug; 20(59):1-180                             | non pertinent |
| 2843 | Allas et al.,     | 2016 | Diabetes, obesity and metabolism. 2016 Sep; 18(9):868-874                        | non pertinent |
| 2844 | Schaller et al.,  | 2016 | J of the european academy of dermatology and venerology. 2016; 30(6):966-973     | non pertinent |
| 2845 | Park et al.,      | 2016 | Clinical therapeutics. 2016 Aug; 38(8):1858-1868.e2                              | non pertinent |
| 2846 | Yanaranop et al., | 2016 | Asia-pacific j of clinical oncology. 2016 Sep; 12(3):289-299                     | non pertinent |
| 2847 | Gerrits et al.,   | 2016 | Fertility and sterility. 2016 Apr; 105(4):1056-1062                              | non pertinent |
| 2848 | Imamura et al.,   | 2016 | Annals of surgical oncology. 2016 Sep; 23(9):2928-2935                           | non pertinent |
| 2849 | Wang et al.,      | 2016 | Medicine (united states). 2016 Jul; 95(28):e4135                                 | non pertinent |
| 2850 | Meador et al.,    | 2016 | Epilepsy and behavior. 2016 Sep; 62:267-275                                      | non pertinent |
| 2851 | Xu et al.,        | 2016 | Integrative cancer therapies. 2016 Sep; 15(3):349-357                            | non pertinent |
| 2852 | Shabsigh et al.,  | 2016 | Sexual medicine. 2016 Sep; 4(3):135-144                                          | non pertinent |
| 2853 | Park et al.,      | 2016 | Otolaryngology – head and neck surgery (united states). 2016 Aug; 155(2):324-331 | non pertinent |
| 2854 | Régis et al.,     | 2016 | J of neurosurgery. 2016 Apr; 124(4):1079-1087                                    | non pertinent |
| 2855 | Yao et al.,       | 2016 | Medicine (united states). 2016 Jul; 95(29):e4274                                 | non pertinent |
| 2856 | Zhao et al.,      | 2016 | Thyroid. 2016 Aug; 26(8):1019-1029                                               | non pertinent |
| 2857 | Chao et al.,      | 2016 | Elife. 2016 Aug; e15691                                                          | non pertinent |
| 2858 | Kimura et al.,    | 2016 | International j of urology. 2016 May; 23(5):395-403                              | non pertinent |
| 2859 | Fisher et al.,    | 2016 | Clinical ophthalmology. 2016 Jul; 10:1297-1303                                   | non pertinent |

|      |                          |      |                                                                   |               |
|------|--------------------------|------|-------------------------------------------------------------------|---------------|
| 2860 | Sheehan et al.,          | 2016 | New england j of medicine. 2016 Aug; 375(7):619-630               | non pertinent |
| 2861 | Eberl et al.,            | 2016 | European j of anaesthesiology. 2016 Sep; 33(9):631-637            | non pertinent |
| 2862 | Knudson et al.,          | 2016 | Diseases of the colon and rectum. 2016 Sep; 59(9):862-869         | non pertinent |
| 2863 | Kumar                    | 2016 | World j of gastroenterology. 2016 Aug; 22(31):7069-7079           | non pertinent |
| 2864 | Thompson et al.,         | 2016 | Clinical infectious diseases. 2016 Aug; 63(3):356-362             | non pertinent |
| 2865 | Morris et al.,           | 2016 | Clinical cancer research. 2016 Aug; 22(15):3774-3781              | non pertinent |
| 2866 | Jakacki et al.,          | 2016 | J of neuro-oncology. 2016 Aug; 129(1):131-138                     | non pertinent |
| 2867 | Dunn et al.,             | 2016 | British j of haematology. 2016 Apr; 173(2):253-259                | non pertinent |
| 2868 | Leung et al.,            | 2016 | Trials. 2016 Aug; 17(1):421                                       | non pertinent |
| 2869 | Simons et al.,           | 2016 | Anesthesiology. 2016 Sep; 125(3):525-534                          | non pertinent |
| 2870 | Dowlati et al.,          | 2016 | J of pharmacology and experimental therapeutics. 2016 May; 357(2) | non pertinent |
| 2871 | Solomon et al.,          | 2016 | J of clinical oncology. 2016 Aug; 34(24):2858-2865                | non pertinent |
| 2872 | Crews et al.,            | 2016 | Diabetes care. 2016 Aug; 39(8):1371-1377                          | non pertinent |
| 2873 | Rhee et al.,             | 2016 | Drug design, development and therapy. 2016 Aug; 10:2525-2534      | non pertinent |
| 2874 | Prostran et al.,         | 2016 | Frontiers in aging neuroscience. 2016 Jun; 8:144                  | non pertinent |
| 2875 | Punga et al.,            | 2016 | Dermatologic surgery. 2016; 42(8):967-976                         | non pertinent |
| 2876 | Da Graca-Tarragó et al., | 2016 | Pain medicine (united states). 2016 May; 17(5):877-891            | non pertinent |

|      |                        |      |                                                                           |               |
|------|------------------------|------|---------------------------------------------------------------------------|---------------|
| 2877 | No authors listed      | 2016 | Prescrire international. 2016 Mar; 25(169):61-64                          | non pertinent |
| 2878 | Younes et al.,         | 2016 | The lancet oncology. 2016 May; 17(5):622-631                              | non pertinent |
| 2879 | Graff et al.,          | 2016 | Cancer. 2016 Aug; 122(16):2524-2533                                       | non pertinent |
| 2880 | Harrison et al.,       | 2016 | Leukemia. 2016 Aug; 30(8):1701-1707                                       | non pertinent |
| 2881 | Van Broekhoven et al., | 2016 | BMC cancer. 2016 Aug; 16(1):686                                           | non pertinent |
| 2882 | Cooper et al.,         | 2016 | Clinical cancer research. 2016 Aug; 22(16):4014-4022                      | non pertinent |
| 2883 | Brodosi et al.,        | 2016 | Annals of hepatology. 2016 Sep-Oct; 15(5):673-681                         | non pertinent |
| 2884 | Schweizer et al.,      | 2016 | Prostate. 2016 Sep; 76(13):1218-1226                                      | non pertinent |
| 2885 | Asghar et al.,         | 2016 | PLoS ONE. 2016 Mar; 11(3):e0150334                                        | non pertinent |
| 2886 | Krishna et al.,        | 2016 | Clinical science. 2016; 130(3):127-150                                    | non pertinent |
| 2887 | Gan et al.,            | 2016 | J of clinical anesthesia. 2016 Jun; 31:249-258                            | non pertinent |
| 2888 | Kimball et al.,        | 2016 | New england j of medicine. 2016 Aug; 375(5):422-434                       | non pertinent |
| 2889 | Kopp et al.,           | 2016 | BMJ open. 2016 Jul; 6(7):e0106651                                         | non pertinent |
| 2890 | Schrubbe et al.,       | 2016 | BMC musculoskeletal disorders. 2016 Aug; 17(1):359                        | non pertinent |
| 2891 | Giusti et al.,         | 2016 | COPD: j of chronic obstructive pulmonary disease. 2016 Sep; 13(5):555-560 | non pertinent |
| 2892 | Medeiros et al.,       | 2016 | Pain medicine. (united states). 2016 Jan; 17(1):122-135                   | non pertinent |
| 2893 | Norton et al.,         | 2016 | J of anxiety disorders. 2016 May; 40:18-28                                | non pertinent |
| 2894 | Nikulina et al.,       | 2016 | Pain. 2016 Jun; 157(8):1791-1798                                          | non pertinent |

|      |                    |      |                                                                           |               |
|------|--------------------|------|---------------------------------------------------------------------------|---------------|
| 2895 | Shi et al.,        | 2016 | Complementary therapies in medicine. 2016 Apr; 25:71-77                   | non pertinent |
| 2896 | Arnold et al.,     | 2016 | Pediatric rheumatology. 2016 Jul; 14(1):46                                | non pertinent |
| 2897 | Kirichenko et al., | 2016 | Phytomedicine. 2016 Oct; 23(11):1198-1210                                 | non pertinent |
| 2898 | Li et al.,         | 2016 | Scientific reports. 2016; 6:20298                                         | non pertinent |
| 2899 | Zunhammer et al.,  | 2015 | Psychosom Med. 2015; 77(2):156-166                                        | non pertinent |
| 2900 | Zongo et al.,      | 2015 | Antimicrobial agents and chemotherapy. 2015; 59(8):4387-4396              | non pertinent |
| 2901 | Zimran et al.,     | 2015 | Blood cells, molecules & diseases. 2015; 54(1):9-16                       | non pertinent |
| 2902 | Zhu et al.,        | 2015 | British j of cancer. 2015; 112(3):429-437                                 | non pertinent |
| 2903 | Zhu et al.,        | 2015 | The lancet. Oncology. 2015; 16(7):859-870                                 | non pertinent |
| 2904 | Zhou et al.,       | 2015 | Hematology (amsterdam, netherlands). 2015; 20(3):129-136                  | non pertinent |
| 2905 | Zheng et al.,      | 2015 | Clinical gastroenterology and hepatology. 2015; 13(7//30772878):1285-1292 | non pertinent |
| 2906 | Zheng et al.,      | 2015 | Current medical research and opinion. 2015; 31(6):1191-1200               | non pertinent |
| 2907 | Zhao et al.,       | 2015 | Chin J Integr Med. 2015; 21(11):855-865                                   | non pertinent |
| 2908 | Zhang et al.,      | 2015 | Medical oncology (Northwood. London, England). 2015; 32(5):147            | non pertinent |
| 2909 | Zhang et al.,      | 2015 | Gut. 2015; 64(11):1715-1720                                               | non pertinent |
| 2910 | Zhang et al.,      | 2015 | Medicine (united states). 2015; 94(4)                                     | non pertinent |
| 2911 | Zeuzem et al.,     | 2015 | Alimentary pharmacology & therapeutics. 2015; 42(7):829-844               | non pertinent |



|      |                  |      |                                                                                                                                                                                        |               |
|------|------------------|------|----------------------------------------------------------------------------------------------------------------------------------------------------------------------------------------|---------------|
| 2912 | Zeidan et al.,   | 2015 | J Neurosci. 2015; 35(46):15307-15325                                                                                                                                                   | non pertinent |
| 2913 | Zapater et al.,  | 2015 | Basic & clinical pharmacology & toxicology. 2015; 116(3):257-263                                                                                                                       | non pertinent |
| 2914 | Zaman et al.,    | 2015 | European j of cancer (Oxford, England : 1990). 2016; 51(10):1212-1220                                                                                                                  | non pertinent |
| 2915 | Zaghloul et al., | 2015 | Pediatric blood and cancer. Conference: 2015 american society of pediatric hematology/oncology. ASPHO 2015. United states. Conference start: 20150506. Conference end: 20150509; 62:80 | non pertinent |
| 2916 | Zaghloul et al., | 2015 | Pediatric blood and cancer. Conference: 2015 american society of pediatric hematology/oncology. ASPHO 2015. United states. Conference start: 20150506. Conference end: 20150509; 62:53 | non pertinent |
| 2917 | Yun et al.,      | 2015 | Movement disorders. 2015; 30(2):206-213                                                                                                                                                | non pertinent |
| 2918 | Yuen et al.,     | 2015 | J of hepatology. 2015; 62(3):526-532                                                                                                                                                   | non pertinent |
| 2919 | Yu et al.,       | 2015 | Lung cancer: targets and therapy. 2015; 6:1-11                                                                                                                                         | non pertinent |
| 2920 | Young et al.,    | 2015 | Neurosurgery. 2015; 77(6):908-915                                                                                                                                                      | non pertinent |
| 2921 | You et al.,      | 2015 | Medicine. 2016; 94(45):e1968                                                                                                                                                           | non pertinent |
| 2922 | Yokoe et al.,    | 2015 | J Oral Maxillofac Surg. 2015; 73(3):402-409                                                                                                                                            | non pertinent |
| 2923 | Yin et al.,      | 2015 | Pharmacology. 2015; 96(3-4):155-162                                                                                                                                                    | non pertinent |
| 2924 | Yeo et al.,      | 2015 | Pain physician. 2015; 18(2):173-178                                                                                                                                                    | non pertinent |
| 2925 | Ye et al.,       | 2015 | Oncotarget. 2015; 7(6):6639-6648                                                                                                                                                       | non pertinent |

|      |                   |      |                                                                                             |               |
|------|-------------------|------|---------------------------------------------------------------------------------------------|---------------|
| 2926 | Yazer et al.,     | 2015 | Regional anesthesia and pain medicine. 2015; 40(1):11-15                                    | non pertinent |
| 2927 | Yang et al.,      | 2015 | BMC anesthesiology. 2015; 15:161                                                            | non pertinent |
| 2928 | Yang et al.,      | 2015 | J of oral and maxillofacial surgery. 2015; 73(6):1065-1072                                  | non pertinent |
| 2929 | Yang et al.,      | 2015 | Addict Biol. 2015; 20(3):523-533                                                            | non pertinent |
| 2930 | Wright et al.,    | 2015 | Otolaryngology – head and neck surgery (united states). 2015; 153(1 SUPPL. 1):132-134       | non pertinent |
| 2931 | Worden et al.,    | 2015 | Endocrine-related cancer. 2015; 22(6):877-887                                               | non pertinent |
| 2932 | Wolinsky et al.,  | 2015 | Multiple sclerosis and related disorders. 2015; 4(4):370-376                                | non pertinent |
| 2933 | Wolf et al.,      | 2015 | Radiotherapy and oncology. 2015; 115:27                                                     | non pertinent |
| 2934 | Wojtalik et al.,  | 2015 | Schizophrenia bulletin. 2015; 41:243                                                        | non pertinent |
| 2935 | Wilens et al.,    | 2015 | J of the American Academy of Child and Adolescent Psychiatry. 2015; 54(11):916-925.e912     | non pertinent |
| 2936 | Wierzba et al.,   | 2015 | PLoS One. 2015; 10(7):e0132305                                                              | non pertinent |
| 2937 | Whitehorn et al., | 2015 | Clinical infectious diseases. 2015; 62(4):468-476                                           | non pertinent |
| 2938 | Westman et al.,   | 2015 | Alcoholism: clinical and experimental research. 2015; 39:149A                               | non pertinent |
| 2939 | Wenzler et al.,   | 2015 | Antimicrobial agents and chemotherapy. 2015; 59(12):7232-7239                               | non pertinent |
| 2940 | Weiss et al.,     | 2015 | Pediatric rheumatology. 2015; 13(1)                                                         | non pertinent |
| 2941 | Weisel et al.,    | 2015 | Clinical lymphoma, myeloma & leukemia. 2015; 15(9// (GSK) *Novartis* // *Novartis*):519-530 | non pertinent |

|      |                            |      |                                                                                                                                        |               |
|------|----------------------------|------|----------------------------------------------------------------------------------------------------------------------------------------|---------------|
| 2942 | Weinstock et al.,          | 2015 | Diabetes, obesity & metabolism. 2015; 17(9):849-858                                                                                    | non pertinent |
| 2943 | Weigel et al.,             | 2015 | Pain Physician. 2015; 18(2):185-194                                                                                                    | non pertinent |
| 2944 | Wehry et al.,              | 2015 | Current psychiatry reports. 2015; 17(7// 1R01MH086517 (NIH) *National Institutes of Health* // (NIMH) *National Institutes of Health*) | non pertinent |
| 2945 | Warren Olanow et al.,      | 2015 | Annals of neurology. 2015; 78(2):248-257                                                                                               | non pertinent |
| 2946 | Wang et al.,               | 2015 | Trials. 2015; 16:584                                                                                                                   | non pertinent |
| 2947 | Wang et al.,               | 2015 | J of alternative and complementary medicine (New York. N.Y.); 21(11):667-672                                                           | non pertinent |
| 2948 | Wang et al.,               | 2015 | Chinese medical j. 2015; 128(1):46-50                                                                                                  | non pertinent |
| 2949 | Wang et al.,               | 2015 | Oral Dis. 2015; 21(5):572-582                                                                                                          | non pertinent |
| 2950 | Wang et al.,               | 2015 | International j of clinical and experimental medicine. 2015; 8(3):3579-3584                                                            | non pertinent |
| 2951 | Walti et al.,              | 2015 | Musculoskelet Disord. 2015; 16:83                                                                                                      | non pertinent |
| 2952 | Wall et al.,               | 2015 | BMJ Open. 2015; 5(12)                                                                                                                  | non pertinent |
| 2953 | Walker et al.,             | 2015 | PLoS One. 2015; 10(2)                                                                                                                  | non pertinent |
| 2954 | Wagenlehner et al.,        | 2015 | Lancet (london, england). 2015; 385(9981):1949-1956                                                                                    | non pertinent |
| 2955 | Volz et al.,               | 2015 | BMC Neurosci. 2015; 16:15                                                                                                              | non pertinent |
| 2956 | Volticovschi-Iosob et al., | 2015 | Cephalalgia. 2015; 35(6 SUPPL. 1):63                                                                                                   | non pertinent |
| 2957 | Vogel et al.,              | 2015 | Biol Psychiatry. 2015; 78(12):830-839                                                                                                  | non pertinent |
| 2958 | Vodicar et al.,            | 2015 | European spine j. (var.pagings). 2015; 24(6 SUPPL. 1):775-776                                                                          | non pertinent |

|      |                      |      |                                                                       |               |
|------|----------------------|------|-----------------------------------------------------------------------|---------------|
| 2959 | Visser et al.,       | 2015 | Psychoneuroendocrinology. 2015; 55:8-20                               | non pertinent |
| 2960 | Viscusi et al.,      | 2015 | Pain. 2015; 157(1):264-272                                            | non pertinent |
| 2961 | Vincent et al.,      | 2015 | Reproductive sciences. 2015; 22:111A                                  | non pertinent |
| 2962 | Vijan et al.,        | 2015 | JAMA – j of the american medical association. 2015; 314(17):1861-1862 | non pertinent |
| 2963 | Vierimaa et al.,     | 2015 | Diseases of the colon and rectum. 2015; 58(10):943-949                | non pertinent |
| 2964 | Vesikari et al.,     | 2015 | Pediatric infectious disease j. 2015; 34(12):e298-e307                | non pertinent |
| 2965 | Verstovsek et al.,   | 2015 | Haematologica. 2015; 100(4):479-488                                   | non pertinent |
| 2966 | Verkleij et al.,     | 2015 | British j of general practice. 2015; 65(637):e530-e537                | non pertinent |
| 2967 | Verduri et al.,      | 2015 | PLoS One. 2015; 10(3):e0118241                                        | non pertinent |
| 2968 | Venkitaraman et al., | 2015 | European urology. 2015; 67(4):673-679                                 | non pertinent |
| 2969 | Vega et al.,         | 2015 | Transplantation. 2015; 99(8):1681-1690                                | non pertinent |
| 2970 | Vaseghi et al.,      | 2015 | Frontiers in human neuroscience. 2015; 9(SEPTEMBER)                   | non pertinent |
| 2971 | Vaseghi et al.,      | 2015 | European j of neuroscience. 2015; 42(7):2426-2437                     | non pertinent |
| 2972 | Vardi et al.,        | 2015 | Aliment Pharmacol Ther. 2015; 42(3):365-374                           | non pertinent |
| 2973 | Vanelderen et al.,   | 2015 | Anesthesiology. 2015;122(2):399-406                                   | non pertinent |
| 2974 | Van Zundert          | 2015 | Regional anesthesia and pain medicine. 2015; 40(5):e32-e34            | non pertinent |
| 2975 | Van Rooij et al.,    | 2015 | Neuropsychopharmacology. 2015; 40(3):667-675                          | non pertinent |
| 2976 | Van Dulmen et al.,   | 2015 | Physiotherapy (united kingdom). 2015; 101:e1573-1574                  | non pertinent |

|      |                        |      |                                                                                                                      |               |
|------|------------------------|------|----------------------------------------------------------------------------------------------------------------------|---------------|
| 2977 | Van der Heijde et al., | 2015 | Rheumatology (oxford, england). 2015; 54(7):1210-1219                                                                | non pertinent |
| 2978 | Van den Elsen et al.,  | 2015 | Neurology. 2015; 84(23):2338-2346                                                                                    | non pertinent |
| 2979 | Van den Bosch et al.,  | 2015 | Neonatology. 2015; 108(1):8-15                                                                                       | non pertinent |
| 2980 | Van Cutsem et al.,     | 2015 | Annals of oncology: official j of the european society for medical oncology. 2015; 26(1):149-156                     | non pertinent |
| 2981 | Valle et al.,          | 2015 | The lancet. Oncology. 2015; 16(8):967-978                                                                            | non pertinent |
| 2982 | Unlu et al.,           | 2015 | Pain research & managemet. 2015; 20(2):107-111                                                                       | non pertinent |
| 2983 | Unger et al.,          | 2015 | BMC medicine. 2015; 13(1)                                                                                            | non pertinent |
| 2984 | Ulgey et al.,          | 2015 | Turkish j of medical sciences. 2015; 45(6):1292-1299                                                                 | non pertinent |
| 2985 | Ubel et al.,           | 2015 | Biological psychology. 2015; 108:78-84                                                                               | non pertinent |
| 2986 | Tuttle et al.,         | 2015 | Pain. 2015; 156(12):2616-2626                                                                                        | non pertinent |
| 2987 | Tutag Lehr et al.,     | 2015 | Clinical J of Pain. 2015; 31(5//*Gerber Foundation*):451-458                                                         | non pertinent |
| 2988 | Tucci et al.,          | 2015 | Therapeutic advances in endocrinology and metabolism. 2015; 6(4):155-162                                             | non pertinent |
| 2989 | Tsukada et al.,        | 2015 | J of bone and joint surgery. American volume. 2015; 97(5):367-373                                                    | non pertinent |
| 2990 | Troyer et al.,         | 2015 | Academic emergency medicine. 2015; 22(5):525-535                                                                     | non pertinent |
| 2991 | Trotti et al.,         | 2015 | Annals of neurology. 2015; 78(3//UL1TR0004 54(NCATS) *National Center for Advancing Translational Sciences*):454-465 | non pertinent |

|      |                         |      |                                                                   |               |
|------|-------------------------|------|-------------------------------------------------------------------|---------------|
| 2992 | Trimble et al,          | 2015 | Lancet (london, england). 2015; 386(10008):2078-2088              | non pertinent |
| 2993 | Trenkwalder et al.,     | 2015 | The lancet. Neurology. 2015; 14(12):1161-1170                     | non pertinent |
| 2994 | Trédan et al.,          | 2015 | Clinical breast cancer. 2015; 15(1):8-15                          | non pertinent |
| 2995 | Trapp et al.,           | 2015 | Back Musculoskelet Rehabil. 2015; 28(4):651-660                   | non pertinent |
| 2996 | Trachtman et al.,       | 2015 | BMC nephrology. 2015; 16(1)                                       | non pertinent |
| 2997 | Toosizadeh et al.,      | 2015 | Gerontology. 2015; 61(1):3-14                                     | non pertinent |
| 2998 | Tomel et al.,           | 2015 | Psycho-oncology. 2015; 24:158-159                                 | non pertinent |
| 2999 | Toledo et al.,          | 2015 | BMC gastroenterology. 2015; 15(1)                                 | non pertinent |
| 3000 | Togashi et al.,         | 2015 | Neurosurgery. 2015;76(2):125-134                                  | non pertinent |
| 3001 | Tilbrook et al.,        | 2015 | Trails. 2015: 16(1)                                               | non pertinent |
| 3002 | Tiemann et al.,         | 2015 | Pain. 2015; 156(2):289-296                                        | non pertinent |
| 3003 | Tiberg et al.,          | 2015 | British j of clinical pharmacology. 2015; 80(3):460-472           | non pertinent |
| 3004 | Thomas                  | 2015 | Physiotherapy (united kingdom). 2015; 101:e1512                   | non pertinent |
| 3005 | Tetreault et al.,       | 2015 | Osteoarthritis and cartilage. 2015; 23_A354-                      | non pertinent |
| 3006 | Terkawi et al.,         | 2015 | Pain Physician. 2015; 18(2):E139-E146                             | non pertinent |
| 3007 | Telnes et al.,          | 2015 | Acta anaesthesiologica Scandinavica. 2015; 59(4):496-504          | non pertinent |
| 3008 | Tedesco Triccas et al., | 2015 | Physiotherapy (united kingdom). 2015; 101:e1496-1497              | non pertinent |
| 3009 | Tatsugami et al.,       | 2015 | International j of cardiovascular imaging. 2015; 31(5):1045-1052  | non pertinent |
| 3010 | Tasdelen et al.,        | 2015 | J of child and adolescent psychopharmacology. 2015; 25(6):494-500 | non pertinent |
| 3011 | Tas et al.,             | 2015 | Medical science monitor. 2015; 21:2382-2386                       | non pertinent |

|      |                         |      |                                                          |                              |
|------|-------------------------|------|----------------------------------------------------------|------------------------------|
| 3012 | Tarantino et al.,       | 2015 | Annals of surgery. 2015; 262(6):934-940                  | non pertinent                |
| 3013 | Tang et al.,            | 2015 | Mediators of inflammation. 2015; 2015:939431             | non pertinent                |
| 3014 | Tan et al.,             | 2015 | European j of pain (united kingdom). 2015; 19(2):271-280 | hypnosis for lower back pain |
| 3015 | Talpur et al.,          | 2015 | Iranian red crescent medical j. 2015; 17(2)              | non pertinent                |
| 3016 | Tajadini et al.,        | 2015 | Complementary therapies in medicine. 2015; 23(6):767-772 | non pertinent                |
| 3017 | Tai et al.,             | 2015 | Biomed research international. 2015                      | non pertinent                |
| 3018 | Taguchi et al.,         | 2015 | J of pain research. 2015; 8:487-497                      | non pertinent                |
| 3019 | Tack et al.,            | 2015 | Neurogastroenterology and motility. 2015; 27(2):258-268  | non pertinent                |
| 3020 | Syal et al.,            | 2015 | Psychoneuroendocrinology. 2015; 53:10-15                 | non pertinent                |
| 3021 | Swenson et al.,         | 2015 | J Clin Anesth. 2015; 27(8):652-657                       | non pertinent                |
| 3022 | Svenningsson et al.,    | 2015 | Brain. 2015; 138(Pt 4):963-973                           | non pertinent                |
| 3023 | Suter et al.,           | 2015 | BMC Med Imaging. 2015; 15:11                             | non pertinent                |
| 3024 | Sur et al.,             | 2015 | European urology. 2015; 67(5):959-964                    | non pertinent                |
| 3025 | Sullivan-Bolyai et al., | 2015 | Diabetes educator. 2015; 41(5):537-549                   | non pertinent                |
| 3026 | Stundner et al.,        | 2015 | Regional anesthesia and pain medicine. 2015; 40(5)       | non pertinent                |
| 3027 | Stuart et al.,          | 2015 | British j of haematology. 2015; 168(6):796-805           | non pertinent                |
| 3028 | Strauss et al.,         | 2015 | Clinical neurophysiology. 2015; 126(8):e83               | non pertinent                |
| 3029 | Stoddard et al.,        | 2015 | Neuropsychopharmacology. 2015; 40:290-291                | non pertinent                |
| 3030 | Stinson et al.,         | 2015 | Arthritis and rheumatology. 2015; 67                     | non pertinent                |

|      |                           |      |                                                                         |               |
|------|---------------------------|------|-------------------------------------------------------------------------|---------------|
| 3031 | Steinman et al.,          | 2015 | J of behavoir therapy and experimental psychiatry. 2015; 49(Pt A):53-60 | non pertinent |
| 3032 | Steffens et al.,          | 2015 | Physiotherapy (united kingdom). 2015; 101:e520-                         | non pertinent |
| 3033 | Steenen et al.,           | 2015 | Trails. 2015; 16:536                                                    | non pertinent |
| 3034 | Stahel et al.,            | 2015 | The lancet. Oncology. 2015; 16(16):1651-1658                            | non pertinent |
| 3035 | Song et al.,              | 2015 | Human reproduction (Oxford, England). 2015; 31(2):332-338               | non pertinent |
| 3036 | Song et al.,              | 2015 | Haematologica. 2015; 100(2):e63-67                                      | non pertinent |
| 3037 | Song et al.,              | 2015 | Vaccine. 2015; 33(41):5437-5444                                         | non pertinent |
| 3038 | Soeter et al.,            | 2015 | Biological psychiatry. 2015; 78(12):880-886                             | non pertinent |
| 3039 | Soen et al.,              | 2015 | Current medical research and opinion. 2015; 31(9):1771-1779             | non pertinent |
| 3040 | Snodgrass et al.,         | 2015 | Physiotherapy (united kingdom). 2015; 101:e1414-                        | non pertinent |
| 3041 | Smolen et al.,            | 2015 | Annals of the rheumatic diseases. 2015; 74(5):843-850                   | non pertinent |
| 3042 | Smith et al.,             | 2015 | JAMA neurology. 2015; 72(1):88-95                                       | non pertinent |
| 3043 | Small et al.,             | 2015 | Trials. 2015; 16:329                                                    | non pertinent |
| 3044 | Slctr – Hapangama et al., | 2015 | Sri Lanka Clinical Trials Registry. 2015                                | non pertinent |
| 3045 | Singla et al.,            | 2015 | Physician and sportsmedicine. 2015; 43(2):126-137                       | non pertinent |
| 3046 | Singh et al.,             | 2015 | Indian heart j. 2015; 67:27-28                                          | non pertinent |
| 3047 | Simmons et al.,           | 2015 | Clinical ophthalmology (auckland, N.Z.). 2015; 9:657-664                | non pertinent |
| 3048 | Sieper et al.,            | 2015 | Annals of the rheumatic diseases. 2015; 74:271-272                      | non pertinent |
| 3049 | Siepe et al.,             | 2015 | Eur Spine J. 2015; 24(4):838-851                                        | non pertinent |
| 3050 | Sienkiewicz et al.,       | 2015 | European j of pediatrics. 2015; 174(11):1475-1480                       | non pertinent |



|      |                   |      |                                                                                          |               |
|------|-------------------|------|------------------------------------------------------------------------------------------|---------------|
| 3051 | Shukuya et al.,   | 2015 | The lancet.<br>Oncology. 2015;<br>16(16):1630-1638                                       | non pertinent |
| 3052 | Shin et al.,      | 2015 | PLoS One. 2015;<br>10(9):e0138422                                                        | non pertinent |
| 3053 | Shin et al.,      | 2015 | Neuropsychophar<br>macology. 2015;<br>40(8):1919-1927                                    | non pertinent |
| 3054 | Shin et al.,      | 2015 | Neural Plast.<br>2015; 2015:630932                                                       | non pertinent |
| 3055 | Shin et al.,      | 2015 | clinical<br>gastroenterology<br>and hepatology.<br>2015; 13(4):701-<br>708               | non pertinent |
| 3056 | Shang et al.,     | 2015 | J of child and<br>adolescent<br>psychopharmacol<br>ogy. 2015;<br>25(7):566-573           | non pertinent |
| 3057 | Shaaban et al.,   | 2015 | Contraception.<br>2015; 92(4):301-<br>307                                                | non pertinent |
| 3058 | Setnik et al.,    | 2015 | J of clinical<br>pharmacology.<br>2015; 55(12):1351-<br>1361                             | non pertinent |
| 3059 | Seo et al.,       | 2015 | Clinical and<br>vaccine<br>immunology.<br>2015; 22(11):1160-<br>1165                     | non pertinent |
| 3060 | Sener et al.,     | 2015 | Turkish j of<br>medical sciences.<br>2015; 45(3):694-<br>699                             | non pertinent |
| 3061 | Senda et al.,     | 2015 | European j of<br>nuclear medicine<br>and molecular<br>imaging. 2015;<br>42(1):89-96      | non pertinent |
| 3062 | Sen et al.,       | 2015 | Urology. 2015;<br>85(6):1247-1251                                                        | non pertinent |
| 3063 | Sekiguchi et al., | 2015 | J of orthopaedic<br>science. 2015;<br>20(4):617-623                                      | non pertinent |
| 3064 | Scott et al.,     | 2015 | Pain research and<br>management.<br>2015; 20(3):e67                                      | non pertinent |
| 3065 | Sclafani et al.,  | 2015 | International j of<br>radiation<br>oncology, biology,<br>physics. 2015;<br>93(2):303-312 | non pertinent |
| 3066 | Schuind et al.,   | 2015 | J of infectious<br>diseases. 2015;<br>212(4):531-541                                     | non pertinent |
| 3067 | Schroer et al.,   | 2015 | J of arthroplasty.<br>2015; 30(9<br>Supplement):64-<br>67                                | non pertinent |
| 3068 | Schreiner et al., | 2015 | Schizophrenia<br>research. 2015;<br>169(1-3):393-399                                     | non pertinent |

|      |                     |      |                                                                                                                                                                                                                                                                                                                                |               |
|------|---------------------|------|--------------------------------------------------------------------------------------------------------------------------------------------------------------------------------------------------------------------------------------------------------------------------------------------------------------------------------|---------------|
| 3069 | Scholl et al.,      | 2015 | Regional anesthesia and pain medicine. Conference: 40th annual regional anesthesia and acute pain medicine meeting of the american society of regional anesthesia and pain medicine. ASRA 2015 las vegas. NV united states. Conference start: 20150514. Conference end: 20150516. Conference publication: (var.pagings); 40(5) | non pertinent |
| 3070 | Schneider et al.,   | 2015 | Physiotherapy (united kingdom). 2015; 101:e1349                                                                                                                                                                                                                                                                                | non pertinent |
| 3071 | Schmitt et al.,     | 2015 | J of cardiovascular pharmacology. 2015; 65(6//*Roche*):611-619                                                                                                                                                                                                                                                                 | non pertinent |
| 3072 | Schmidt et al.,     | 2015 | American j of respiratory and critical care medicine. 2015; 191                                                                                                                                                                                                                                                                | non pertinent |
| 3073 | Schmidt et al.,     | 2015 | Brain. 2015; 138(Pt 1):217-228                                                                                                                                                                                                                                                                                                 | non pertinent |
| 3074 | Schlaeger et al.,   | 2015 | J of sexual medicine. 2015; 12(4):1019-1027                                                                                                                                                                                                                                                                                    | non pertinent |
| 3075 | Schietroma et al.,  | 2015 | J of the american college of surgeons. 2015; 220(5):921-933                                                                                                                                                                                                                                                                    | non pertinent |
| 3076 | Scherz et al.,      | 2015 | J of clinical pharmacology. 2015; 55(6):688-697                                                                                                                                                                                                                                                                                | non pertinent |
| 3077 | Schaub et al.,      | 2015 | BMC Psychiatry. 2015; 15(1)                                                                                                                                                                                                                                                                                                    | non pertinent |
| 3078 | Schadendorf et al., | 2015 | European j of cancer (Oxford, England : 1990). 2015; 51(7):833-840                                                                                                                                                                                                                                                             | non pertinent |
| 3079 | Scahill et al.,     | 2015 | American j of psychiatry. 2015; 172(12):1197-1206                                                                                                                                                                                                                                                                              | non pertinent |

|      |                      |      |                                                                                                        |               |
|------|----------------------|------|--------------------------------------------------------------------------------------------------------|---------------|
| 3080 | Scagliotti et al.,   | 2015 | Annals of oncology: official journal of the european society for medical oncology. 2015; 26(3):497-504 | non pertinent |
| 3081 | Sato et al.,         | 2015 | Sci Rep. 2015; 5:12432                                                                                 | non pertinent |
| 3082 | Sargin et al.,       | 2015 | Paediatric anaesthesia. 2015; 25(9):950-955                                                            | non pertinent |
| 3083 | Sardar et al.,       | 2015 | Spine j. 2015; 15(10 SUPPL. 1):89                                                                      | non pertinent |
| 3084 | Sanford et al.,      | 2015 | British j of haematology. 2015; 171(4):471-477                                                         | non pertinent |
| 3085 | Sandor et al.,       | 2015 | International j of cardiology. 2015; 179:470-475                                                       | non pertinent |
| 3086 | Sandhu et al.,       | 2015 | Trials. 2015; 16(1)                                                                                    | non pertinent |
| 3087 | Sanders et al.,      | 2015 | Arthritis Rheumatol. 2015; 67(3):741-751                                                               | non pertinent |
| 3088 | Sandborn et al.,     | 2015 | Alimentary pharmacology & therapeutics. 2015; 41(5):409-418                                            | non pertinent |
| 3089 | Sanci et al.,        | 2015 | PLoS One. 2015; 10(9):566849                                                                           | non pertinent |
| 3090 | Salehi et al.,       | 2015 | Annals of cardiac anaesthesia. 2015; 18(4):486-490                                                     | non pertinent |
| 3091 | Sahraian et al.,     | 2015 | Trials. 2015; 16:94                                                                                    | non pertinent |
| 3092 | Saez-Llorens et al., | 2015 | Human vaccines & immunotherapeutics. 2015; 11(6):1507-1517                                             | non pertinent |
| 3093 | Saeed et al.,        | 2015 | International j of surgery (London, England). 2015; 13:76-79                                           | non pertinent |
| 3094 | Sacheck et al.,      | 2015 | Clinical trials (london, england). 2015; 12(1):45-53                                                   | non pertinent |
| 3095 | Sabatine et al.,     | 2015 | New England j of medicine. 2015; 372(16):1500-1509                                                     | non pertinent |
| 3096 | Saanijoki et al.,    | 2015 | Med Sci Sports Exerc. 2015; 47(12):2604-2611                                                           | non pertinent |
| 3097 | Saad et al.,         | 2015 | European urology. 2015; 68(4):570-577                                                                  | non pertinent |

|      |                       |      |                                                                                                           |               |
|------|-----------------------|------|-----------------------------------------------------------------------------------------------------------|---------------|
| 3098 | Rynn et al.,          | 2015 | J of the American Academy of Child and Adolescent Psychiatry. 2015; 54(3):180-190                         | non pertinent |
| 3099 | Rütgen et al.,        | 2015 | Proceedings of the National Academy of Sciences of the United States of America. 2015; 112(41):E5638-5646 | non pertinent |
| 3100 | Rutgen et al.,        | 2015 | J Neurosci. 2015; 35(23):8938-3947                                                                        | non pertinent |
| 3101 | Rosenfield et al.,    | 2015 | N Engl J Med. 2015; 373(2):145-153                                                                        | non pertinent |
| 3102 | Röllig et al.,        | 2015 | The lancet. Oncology. 2015; 16(16):1691-1699                                                              | non pertinent |
| 3103 | Rogers et al.,        | 2015 | J of thoracic and cardiovascular surgery. 2015; 150(6):1610-1619.e1613                                    | non pertinent |
| 3104 | Roerink et al.,       | 2015 | Trials. 2015; 16:439                                                                                      | non pertinent |
| 3105 | Rivolta et al.,       | 2015 | Schizophr Bull. 2015; 41(5):1105-1114                                                                     | non pertinent |
| 3106 | Riley et al.,         | 2015 | Man Ther. 2015; 20(3):469-474                                                                             | non pertinent |
| 3107 | Riegersperger et al., | 2015 | Trials. 2015; 16:182                                                                                      | non pertinent |
| 3108 | Rief et al.,          | 2015 | PLoS One. 2015; 10(9):e0136737                                                                            | non pertinent |
| 3109 | Riederer              | 2015 | J fur neurologie, neurochirurgie und psychiatrie. 2015; 16(2):82-83                                       | non pertinent |
| 3110 | Riederer              | 2015 | J fur neurologie, neurochirurgie und psychiatrie. 2015; 16(3):119-120                                     | non pertinent |
| 3111 | Richardson et al.,    | 2015 | NeuroRehabilitati on. 2015; 36(1):115-126                                                                 | non pertinent |
| 3112 | Remenova et al.,      | 2015 | Orphanet j of rare diseases. 2015; 10:81                                                                  | non pertinent |
| 3113 | Reinisch et al.,      | 2015 | Gut. 2015; 64(6):894-900                                                                                  | non pertinent |
| 3114 | Ranawaka et al.,      | 2015 | International j of dermatology. 2015; 54(5):555-563                                                       | non pertinent |
| 3115 | Ramsauer et al.,      | 2015 | The lancet. Infectious diseases. 2015; 15(5):519-527                                                      | non pertinent |
| 3116 | Rambaldi et al.,      | 2015 | The lancet. Oncology. 2015; 16(15):1525-1536                                                              | non pertinent |

|      |                          |      |                                                                                                    |               |
|------|--------------------------|------|----------------------------------------------------------------------------------------------------|---------------|
| 3117 | Ramalingam et al.,       | 2015 | Annals of oncology: official j of the european society for medical oncology. 2015; 26(8):1741-1748 | non pertinent |
| 3118 | Rajan et al.,            | 2015 | Urologic oncology: seminars and originals investigations. 2015; 33(8):337.e331-337.e336            | non pertinent |
| 3119 | Raghu et al.,            | 2015 | European respiratory j. 2015; 46(6):1740-1750                                                      | non pertinent |
| 3120 | Pursnani et al.,         | 2015 | Circulation. Cardiovascular imaging. 2015; 8(3)                                                    | non pertinent |
| 3121 | Puiu et al.,             | 2015 | Neurology. 2015; 84                                                                                | non pertinent |
| 3122 | Pryor et al.,            | 2015 | Br J Anaesth. 2015; 115 Suppl. 1:i104-i113                                                         | non pertinent |
| 3123 | Provenza et al.,         | 2015 | Clinical rheumatology. 2015; 34(8):1455-1462                                                       | non pertinent |
| 3124 | Prossin et al.,          | 2015 | Neuropsychopharmacology. 2015; 40(3):554-565                                                       | non pertinent |
| 3125 | Pross et al.,            | 2015 | British j of clinical pharmacology. 2015; 80(3):480-492                                            | non pertinent |
| 3126 | Prestgaard et al.,       | 2015 | Pain. 2015; 156(9):1683-1691                                                                       | non pertinent |
| 3127 | Preller et al.,          | 2015 | European psychiatry. 2015; 30:22                                                                   | non pertinent |
| 3128 | Preller et al.,          | 2015 | Biological psychiatry. 77(9 SUPPL 1):134S-135S                                                     | non pertinent |
| 3129 | Preis et al.,            | 2015 | PLoS One. 2015; 10(8):e0137056                                                                     | non pertinent |
| 3130 | Postow et al.,           | 2015 | New England j of medicine. 2015; 372(21):2006-2017                                                 | non pertinent |
| 3131 | Pollo-Flores et al.,     | 2015 | Digestive and liver disease. 2015; 47(11):957-963                                                  | non pertinent |
| 3132 | Pogacnik Murillo et al., | 2015 | Osteoarthritis and cartilage. 2015; 23:A389-A390                                                   | non pertinent |

|      |                          |      |                                                                                                                                                                                        |               |
|------|--------------------------|------|----------------------------------------------------------------------------------------------------------------------------------------------------------------------------------------|---------------|
| 3133 | Pleguezuelos et al.,     | 2015 | Clinical and vaccine immunology. 2015; 22(7):828-835                                                                                                                                   | non pertinent |
| 3134 | Place et al.,            | 2015 | The lancet. Oncology. 2015; 16(16):1677-1690                                                                                                                                           | non pertinent |
| 3135 | Pirio Richardson et al., | 2015 | PLoS One. 2015; 10(4):e0124937                                                                                                                                                         | non pertinent |
| 3136 | Pilge et al.,            | 2015 | Eur J Anaesthesiol. 2015; 32(5):354-365                                                                                                                                                | non pertinent |
| 3137 | Pijnenburg et al.,       | 2015 | Brain connectivity. 2015; 5(5):303-311                                                                                                                                                 | non pertinent |
| 3138 | Pignata et al.,          | 2015 | The lancet. Oncology. 2015; 16(5):561-568                                                                                                                                              | non pertinent |
| 3139 | Piessevaux et al.,       | 2015 | Neurogastroenterology and motility. 2015; 27(6):805-815                                                                                                                                | non pertinent |
| 3140 | Pierce et al.,           | 2015 | Drug design, development and therapy. 2015; 9:1257-1268                                                                                                                                | non pertinent |
| 3141 | Pickering et al.,        | 2015 | Pain Physician. 2015; 18(3):249-257                                                                                                                                                    | non pertinent |
| 3142 | Pickering et al.,        | 2015 | Drug Des Devel Ther. 2015; 9:3853-3862                                                                                                                                                 | non pertinent |
| 3143 | Pickard et al.,          | 2015 | Lancet. 2015; 386(9991):341-349                                                                                                                                                        | non pertinent |
| 3144 | Phillips                 | 2015 | Osteoarthritis and cartilage. 2015; 23:A357                                                                                                                                            | non pertinent |
| 3145 | Pezzuolo et al.,         | 2015 | Annals of oncology. Conference: 17th national congress of medical oncology rome italy. Conference start: 20151023. Conference end: 20151025. Conference publication: (var.pagings); 26 | non pertinent |
| 3146 | Petre et al.,            | 2015 | Hum Brain Mapp. 2015; 36(2):683-694                                                                                                                                                    | non pertinent |
| 3147 | Perrone et al.,          | 2015 | Annals of oncology: official journal of the european society for medical oncology. 2015; 26(4):675-682                                                                                 | non pertinent |

|      |                    |      |                                                                        |               |
|------|--------------------|------|------------------------------------------------------------------------|---------------|
| 3148 | Perotti et al.,    | 2015 | Anesthesia and Analgesia. 2015; 121(2):348-356                         | non pertinent |
| 3149 | Perez et al.,      | 2015 | The lancet. Oncology. 2015; 16(15):1556-1568                           | non pertinent |
| 3150 | Pereira et al.,    | 2015 | Trials. 2015; 16(1)                                                    | non pertinent |
| 3151 | Pelletier et al.,  | 2015 | Arthritis and rheumatology. 2015; 67                                   | non pertinent |
| 3152 | Peerdeman et al.,  | 2015 | PLoS One. 2015; 10(10):e0139563                                        | non pertinent |
| 3153 | Pauls et al.,      | 2015 | American j of obstetrics and gynecology. 2015; 213(5):718e711-e718e717 | non pertinent |
| 3154 | Pascher et al.,    | 2015 | American j of transplantation. 2015; 15(5):1283-1292                   | non pertinent |
| 3155 | Pasalar et al.,    | 2015 | Explore: the j of science and healing. 2015; 11(3):199-207             | non pertinent |
| 3156 | Park et al.,       | 2015 | Surgical endoscopy. 2015; 29(2):453-457                                | non pertinent |
| 3157 | Park et al.,       | 2015 | Pain Physician. 2015; 18(1):93-99                                      | non pertinent |
| 3158 | Papaoiu et al.,    | 2015 | J of investigative dermatology. 2015; 135(2):560-568                   | non pertinent |
| 3159 | Papi et al.,       | 2015 | The lancet respiratory medicine. 2015; 3(2):109-119                    | non pertinent |
| 3160 | Papakostas et al., | 2015 | American j of psychiatry. 2015; 172(12):1251-1258                      | non pertinent |
| 3161 | Paintsil et al.,   | 2015 | AIDS Care. 2015; 27 Suppl 1:18-27                                      | non pertinent |
| 3162 | Packman et al.,    | 2015 | J of pharmaceutical health care and sciences. 2015; 1(1)               | non pertinent |
| 3163 | Ozturk et al.,     | 2015 | BMC anesthesiology. 2015; 15:104                                       | non pertinent |
| 3164 | Ozdemir et al.,    | 2015 | J Back Musculoskelet Rehabil. 2015; 28(4):749-753                      | non pertinent |
| 3165 | Oza et al.,        | 2015 | The lancet. Oncology. 2015; 16(1):87-97                                | non pertinent |
| 3166 | Overton et al.,    | 2015 | Anal of internal medicine. 2015; 162(12):815-824                       | non pertinent |
| 3167 | Otsuka et al.,     | 2015 | J of nippon medical school. 2015; 82(1):21-26                          | non pertinent |

|      |                   |      |                                                                                    |               |
|------|-------------------|------|------------------------------------------------------------------------------------|---------------|
| 3168 | Otruba            | 2015 | Bolest. 2015; 18(1):29-35<br>Clinical J of Pain. 2015;                             | non pertinent |
| 3169 | Ostenfeld et al., | 2015 | 31(4)/(GSK)*GlaxoSmithKline*):283-293<br>JAMA Psychiatry. 2015; 72(5):430-437      | non pertinent |
| 3170 | Oslin et al.,     | 2015 | JAMA dermatology. 2015; 151(8):854-861                                             | non pertinent |
| 3171 | Ormerod et al.,   | 2015 | Anesthesiology. 2015; 122(4):759-767                                               | non pertinent |
| 3172 | Orliaguet et al., | 2015 | PLoS One. 2015; 10(5)/(USAID)*United States Agency for International Development*) | non pertinent |
| 3173 | Omosa-Manyonyi    | 2015 | Cephalalgia. 2015; 35(6):43-44                                                     | non pertinent |
| 3174 | Oliveira et al.,  | 2015 | Anesthesia and Analgesia. 2015; 121(5):1165-1175                                   | non pertinent |
| 3175 | Olesen et al.,    | 2015 | Scandinavian j of gastroenterology. 2015; 50(2):138-144                            | non pertinent |
| 3176 | Olesen et al.,    | 2015 | Spine j. 2015; 15(10):195S-196S                                                    | non pertinent |
| 3177 | Ohnmeiss et al.,  | 2015 | PLoS One. 2015; 10(3)                                                              | non pertinent |
| 3178 | Ogata et al.,     | 2015 | Trials. 2015; 16:186                                                               | non pertinent |
| 3179 | O'Neill et al.,   | 2015 | Physiotherapy (united kingdom). 2015; 101:eS1140-eS1141                            | non pertinent |
| 3180 | O'Malley et al.,  | 2015 | Alzheimer's research & therapy. 2015; 7(1)                                         | non pertinent |
| 3181 | Nygaard et al.,   | 2015 | Netherlands Trial Register. 2015                                                   | non pertinent |
| 3182 | Ntr – Evers       | 2015 | Cancer immunology, immunotherapy. 2015; 64(4):493-505                              | non pertinent |
| 3183 | Noguchi et al.,   | 2015 | Health technology assessment. 2015; 19(83):1-93                                    | non pertinent |
| 3184 | Noble et al.,     | 2015 | Medecine nucleaire. 2015; 39(6):502-513                                            | non pertinent |
| 3185 | Nisand et al.,    | 2015 | Basic & clinical pharmacology & toxicology. 2015; 116(2):140-145                   | non pertinent |
| 3186 | Nielsen et al.,   | 2015 |                                                                                    | non pertinent |



|      |                                   |      |                                                                                 |               |
|------|-----------------------------------|------|---------------------------------------------------------------------------------|---------------|
| 3187 | Nguyen-Lu et al.,                 | 2015 | Canadian j of<br>anesthesia. 2015;<br>62(8):866-874                             | non pertinent |
| 3188 | Nguyen et al.,                    | 2015 | Arthritis research<br>& therapy. 2015;<br>17(1)                                 | non pertinent |
| 3189 | Newby                             | 2015 | Lancet. 2015;<br>385(9985):2383-<br>2391                                        | non pertinent |
| 3190 | Nenke et al.,                     | 2015 | Psychoneuroendo<br>crinology. 2015;<br>56:157-167                               | non pertinent |
| 3191 | Neilson et al.,                   | 2015 | BMJ Open. 2015;<br>5(4):e006874                                                 | non pertinent |
| 3192 | Ndounga et al.,                   | 2015 | Malaria j. 2015;<br>14(1)/(EDCTP):*<br>World Health<br>Organization*/(          | non pertinent |
| 3193 | Nct - Walsh                       | 2015 | WHO)*World<br>Health<br>Organization*)<br>National Library of<br>Medicine. 2015 | non pertinent |
| 3194 | Nct - Tuuli                       | 2015 | National Library of<br>Medicine. 2015                                           | non pertinent |
| 3195 | Nct - Isaac                       | 2015 | National Library of<br>Medicine. 2015                                           | non pertinent |
| 3196 | Nct - Lindberg-<br>Larsen et al., | 2015 | Acta Anaesthesiol<br>Scand. 2018 Aug;<br>62(7):882-892                          | non pertinent |
| 3197 | Nct - Zhang                       | 2015 | National Library of<br>Medicine. 2015                                           | non pertinent |
| 3198 | Nct - Li                          | 2015 | National Library of<br>Medicine. 2015                                           | non pertinent |
| 3199 | Nct - Pattison                    | 2015 | National Library of<br>Medicine. 2015                                           | non pertinent |
| 3200 | Nct - van<br>Poppelen et al.,     | 2015 | BMC Neurol. 2020<br>Jan; 20(1):40                                               | non pertinent |
| 3201 | Nct - Maruani et<br>al.,          | 2015 | Trials. 2018 Jun;<br>19(1):340                                                  | non pertinent |
| 3202 | Nct - Cataldo                     | 2015 | National Library of<br>Medicine. 2015                                           | non pertinent |
| 3203 | Nct - Woolley                     | 2015 | National Library of<br>Medicine. 2015                                           | non pertinent |
| 3204 | Nct - Chan                        | 2015 | National Library of<br>Medicine. 2015                                           | non pertinent |
| 3205 | Nct - Hanling                     | 2015 | National Library of<br>Medicine. 2015                                           | non pertinent |
| 3206 | Nct - Morse                       | 2015 | National Library of<br>Medicine. 2015                                           | non pertinent |
| 3207 | Nct - Neuts et al.,               | 2015 | Reg Anesth Pain<br>Med. 2018 Oct;<br>43(7):738-744                              | non pertinent |
| 3208 | Nct - Vogt                        | 2015 | National Library of<br>Medicine. 2015                                           | non pertinent |
| 3209 | Nct - Coleman                     | 2015 | National Library of<br>Medicine. 2015                                           | non pertinent |
| 3210 | Nct - Kyriacou                    | 2015 | National Library of<br>Medicine. 2015                                           | non pertinent |
| 3211 | Nct - Kim                         | 2015 | National Library of<br>Medicine. 2015                                           | non pertinent |
| 3212 | Nct - McDonald                    | 2015 | National Library of<br>Medicine. 2015                                           | non pertinent |
| 3213 | Nct - Menderes                    | 2015 | National Library of<br>Medicine. 2015                                           | non pertinent |

|      |                                                    |      |                                                                     |               |
|------|----------------------------------------------------|------|---------------------------------------------------------------------|---------------|
| 3214 | Nct – Schuster                                     | 2015 | National Library of Medicine. 2015                                  | non pertinent |
| 3215 | Nct – Visser                                       | 2015 | National Library of Medicine. 2015                                  | non pertinent |
| 3216 | Nct – Butler                                       | 2015 | National Library of Medicine. 2015                                  | non pertinent |
| 3217 | Nct – Universitair Ziekenhuis Brussel              | 2015 | National Library of Medicine. 2015                                  | non pertinent |
| 3218 | Nct – Liaw                                         | 2015 | National Library of Medicine. 2015                                  | non pertinent |
| 3219 | Nct – Barnes                                       | 2015 | National Library of Medicine. 2015                                  | non pertinent |
| 3220 | Nct – Hendler                                      | 2015 | National Library of Medicine. 2015                                  | non pertinent |
| 3221 | Nct - Lefebvre                                     | 2015 | National Library of Medicine. 2015                                  | non pertinent |
| 3222 | Nct – Sprecher                                     | 2015 | National Library of Medicine. 2015                                  | non pertinent |
| 3223 | Nct – Gouin                                        | 2015 | National Library of Medicine. 2015                                  | non pertinent |
| 3224 | Nct – Caumo                                        | 2015 | National Library of Medicine. 2015                                  | non pertinent |
| 3225 | Nct – Le et al.,                                   | 2015 | Biol Psychiatry Cogn Neurosci Neuroimaging. 2018 Oct; 3(10):836-843 | non pertinent |
| 3226 | Nct – Thastum et al.,                              | 2015 | EClinicalMedicine . 2019 Dec; 17:100214                             | non pertinent |
| 3227 | Nct – Ritvo et al.,                                | 2015 | JMIR Res Protoc. 2017 Aug; 6(8):e165                                | non pertinent |
| 3228 | Nct – Buxbaum                                      | 2015 | National Library of Medicine. 2015                                  | non pertinent |
| 3229 | Nct – Malluche                                     | 2015 | National Library of Medicine. 2015                                  | non pertinent |
| 3230 | Nct – Goddard                                      | 2015 | National Library of Medicine. 2015                                  | non pertinent |
| 3231 | Nct – Prüss-Volz                                   | 2015 | National Library of Medicine. 2015                                  | non pertinent |
| 3232 | Nct – Bruun Wyller                                 | 2015 | National Library of Medicine. 2015                                  | non pertinent |
| 3233 | Nct – Teachman                                     | 2015 | National Library of Medicine. 2015                                  | non pertinent |
| 3234 | Nct – Deitos et al.,                               | 2015 | Front Hum Neurosci. 2018 Nov; 12:406                                | non pertinent |
| 3235 | Nct – Dornbierer et al.,                           | 2015 | Int J Neuropsychopharmacol. 2019 Oct; 22(10):631-639                | non pertinent |
| 3236 | Nct – Gordon                                       | 2015 | National Library of Medicine. 2015                                  | non pertinent |
| 3237 | Nct – Oken                                         | 2015 | National Library of Medicine. 2015                                  | non pertinent |
| 3238 | Nct – Cerritelli                                   | 2015 | National Library of Medicine. 2015                                  | non pertinent |
| 3239 | Nct – Kara                                         | 2015 | National Library of Medicine. 2015                                  | non pertinent |
| 3240 | Nct – American University of Beirut Medical Center | 2015 | National Library of Medicine. 2015                                  | non pertinent |

|      |                      |      |                                                                               |               |
|------|----------------------|------|-------------------------------------------------------------------------------|---------------|
| 3241 | Nct – Ostacoli       | 2015 | National Library of Medicine. 2015                                            | non pertinent |
| 3242 | Nct – Kong et al.,   | 2015 | Trials. 2018 Dec; 19(1):685                                                   | non pertinent |
| 3243 | Nct – Day et al.,    | 2015 | Rehabil Psychol. 2019 Aug; 64(3):279-287                                      | non pertinent |
| 3244 | Nct – Rakel          | 2015 | National Library of Medicine. 2015                                            | non pertinent |
| 3245 | Nct – Lin            | 2015 | National Library of Medicine. 2015                                            | non pertinent |
| 3246 | Nct – Anderson       | 2015 | National Library of Medicine. 2015                                            | non pertinent |
| 3247 | Nct – Calmo          | 2015 | National Library of Medicine. 2015                                            | non pertinent |
| 3248 | Nct – Rawdon et al., | 2015 | Psychiatry Res. 2018 May; 263:257-267                                         | non pertinent |
| 3249 | Nct – Verma          | 2015 | National Library of Medicine. 2015                                            | non pertinent |
| 3250 | Nct – Brill          | 2015 | National Library of Medicine. 2015                                            | non pertinent |
| 3251 | Nct – Fashokun       | 2015 | National Library of Medicine. 2015                                            | non pertinent |
| 3252 | Nct – Borckardt      | 2015 | National Library of Medicine. 2015                                            | non pertinent |
| 3253 | Nct – Caumo          | 2015 | National Library of Medicine. 2015                                            | non pertinent |
| 3254 | Nayak et al.,        | 2015 | J of neuro-oncology. 2015; 123(1):129-134                                     | non pertinent |
| 3255 | Nawijn et al.,       | 2015 | European neuropsychopharmacology. 2015; 25:323-324                            | non pertinent |
| 3256 | Natelson et al.,     | 2015 | J Pain. 2015; 16(11):1211-1219                                                | non pertinent |
| 3257 | Najafi et al.,       | 2015 | Progress in orthodontics. 2015; 16(1)                                         | non pertinent |
| 3258 | Murphy et al.,       | 2015 | J of child and adolescent psychopharmacology. 2015; 25(1):57-64               | non pertinent |
| 3259 | Murakami et al.,     | 2015 | Arthritis research & therapy. 2015; 17:224                                    | non pertinent |
| 3260 | Mullane et al.,      | 2015 | Antimicrobial agents and chemotherapy. 2015; 59(3):1435-1440                  | non pertinent |
| 3261 | Morin et al.,        | 2015 | International urogynecology j and pelvic floor dysfunction. 2015; 26(1):47-49 | non pertinent |
| 3262 | Moreau et al.,       | 2015 | Blood. 2015; 126(23):395                                                      | non pertinent |
| 3263 | Mooney et al.,       | 2015 | Drug and alcohol dependence. 2015; 153:94-103                                 | non pertinent |
| 3264 | Montandon et al.,    | 2015 | Sleep. 2015; 38:A143-A144                                                     | non pertinent |

|      |                           |      |                                                                                                          |               |
|------|---------------------------|------|----------------------------------------------------------------------------------------------------------|---------------|
| 3265 | Monserenusorn et al.,     | 2015 | Chotmaiht<br>thangphaet (J of<br>the Medical<br>Association of<br>Thailand). 2015;<br>98(4):358-364      | non pertinent |
| 3266 | Monnig et al.,            | 2015 | Alcoholism:<br>clinical and<br>experimental<br>research. 2015;<br>39:149A                                | non pertinent |
| 3267 | Monagle et al.,           | 2015 | Anesthesia and<br>Analgesia. 2015;<br>121(4):914-924                                                     | non pertinent |
| 3268 | Molina et al.,            | 2015 | New England j of<br>medicine. 2015;<br>373(23//)*Bill and<br>Melinda Gates<br>Foundation*):2237-<br>2246 | non pertinent |
| 3269 | Moliadze et al.,          | 2015 | Brain research<br>bulletin. 2015;<br>119(Pt A):25-33                                                     | non pertinent |
| 3270 | Moisset et al.,           | 2015 | Brain Stimul.<br>2015; 8(1):135-<br>141                                                                  | non pertinent |
| 3271 | Mohammadinejad<br>et al., | 2015 | Annals of<br>pharmacotherapy.<br>2015; 49(9):953-<br>961                                                 | non pertinent |
| 3272 | Mitchell et al.,          | 2015 | J of pain and<br>symptom<br>management.<br>2015; 50(3):289-<br>296                                       | non pertinent |
| 3273 | Mistraletti et al.,       | 2015 | Minerva<br>Anesthesiologica.<br>2015; 81(12):1298-<br>1310                                               | non pertinent |
| 3274 | Min et al.,               | 2015 | Chinese j of tissue<br>engineering<br>research. 2015;<br>19(3):335-339                                   | non pertinent |
| 3275 | Mily et al.,              | 2015 | PLoS One. 2015;<br>10(9):2013-<br>0366*Hjart-<br>Lungfonden                                              | non pertinent |
| 3276 | Mills et al.,             | 2015 | Patient. 2015;<br>8(4):359-371                                                                           | non pertinent |
| 3277 | Miller et al.,            | 2015 | Orthop Nurs. 2015;<br>34(4):227-234                                                                      | non pertinent |
| 3278 | Miller et al.,            | 2015 | BMC<br>pharmacology and<br>toxicology. 2015;<br>16(1)                                                    | non pertinent |
| 3279 | Milani et al.,            | 2015 | J of arthroplasty.<br>2015; 30(11):2038-<br>2042                                                         | non pertinent |
| 3280 | Miclescu et al.,          | 2015 | Scandinavian j of<br>pain. 2015; 8:37-<br>44                                                             | non pertinent |

|      |                            |      |                                                                                                              |               |
|------|----------------------------|------|--------------------------------------------------------------------------------------------------------------|---------------|
| 3281 | Mestre et al.,             | 2015 | Parkinsonism & related disorders. 2015; 21(11):1349-1354                                                     | non pertinent |
| 3282 | Mesa et al.,               | 2015 | Haematologica. 2015; 100:336-337                                                                             | non pertinent |
| 3283 | Meng et al.,               | 2015 | Chin Med J (Engl). 2015; 128(10):1321-1325                                                                   | non pertinent |
| 3284 | Mello et al.,              | 2015 | Neural plasticity. 2015                                                                                      | non pertinent |
| 3285 | Meeus et al.,              | 2015 | Pain practice. 2015; 15(2):98-106                                                                            | non pertinent |
| 3286 | McRae et al.,              | 2015 | J of emergency medicine. 2015; 48(5):581-589                                                                 | non pertinent |
| 3287 | McQuaid et al.,            | 2015 | CMAJ: Canadian Medical Association j. 2015; 187(7)/(NIHR)*National Institute for Health Research*):E215-E225 | non pertinent |
| 3288 | McNamee et al.,            | 2015 | Sleep. 2015; 38:A116                                                                                         | non pertinent |
| 3289 | McKavanagh et al.,         | 2015 | European heart j cardiovascular imaging. 2015; 16(4):441-448                                                 | non pertinent |
| 3290 | McCaskey et al.,           | 2015 | Trials. 2015; 16:571                                                                                         | non pertinent |
| 3291 | Mayer et al.,              | 2015 | New England j of medicine. 2015; 372(20):1909-1919                                                           | non pertinent |
| 3292 | May et al.,                | 2015 | J of neuroscience. 2015; 35(3):1199-1210                                                                     | non pertinent |
| 3293 | Maurice-Szamburski et al., | 2015 | JAMA – j of the american medical association. 2015; 313(9):916-925                                           | non pertinent |
| 3294 | Matre et al.,              | 2015 | Sleep. 38(10):1607-1617                                                                                      | non pertinent |
| 3295 | Martini et al.,            | 2015 | PLoS One. 2015; 10(6)                                                                                        | non pertinent |
| 3296 | Martinez et al.,           | 2015 | Lancet (london, england). 2015; 385(9971):857-866                                                            | non pertinent |
| 3297 | Martin et al.,             | 2015 | J of clinical oncology. 2015; 33(9):1045-1052                                                                | non pertinent |
| 3298 | Martel-Pelletier et al.,   | 2015 | Osteoporosis international. 2015; 26(1 SUPPL 1):144-145                                                      | non pertinent |

|      |                       |      |                                                                             |               |
|------|-----------------------|------|-----------------------------------------------------------------------------|---------------|
| 3299 | Marseglia et al.,     | 2015 | J of biological regulators and homeostatic agents. 2015; 29(2):509-514      | non pertinent |
| 3300 | Marrs et al.,         | 2015 | British j of dermatology. 2015; 173(5):1125-1129                            | non pertinent |
| 3301 | Marottoli et al.,     | 2015 | J of the american geriatrics society. 2015; 63:184                          | non pertinent |
| 3302 | Mardjuadi et al.,     | 2015 | Targeted oncology. 2015; 10(3):375-383                                      | non pertinent |
| 3303 | Marder et al.,        | 2015 | Biological psychiatry. 2015; 77(9 Suppl 1):300                              | non pertinent |
| 3304 | Marashi et al.,       | 2015 | Acta medica iranica. 2015; 53(12):733-737                                   | non pertinent |
| 3305 | Mao et al.,           | 2015 | Appl Ergon. 2015; 51:80-84                                                  | non pertinent |
| 3306 | Manwani et al.,       | 2015 | American j of hematology. 2015; 90(5):381-385                               | non pertinent |
| 3307 | Manimmanakorn et al., | 2015 | Int J Sports Physiol Perform. 2015; 10(3):388-395                           | non pertinent |
| 3308 | Major et al.,         | 2015 | Gut. 2015; 64:A33                                                           | non pertinent |
| 3309 | Mahner et al.,        | 2015 | European j of cancer (Oxford, England : 1990). 2015; 51(3):352-358          | non pertinent |
| 3310 | Mahler et al.,        | 2015 | Respiratory medicine. 2015; 109(8):1031-1039                                | non pertinent |
| 3311 | Maggiore et al.,      | 2015 | Therapeutics and clinical risk management. 2015; 11:557-563                 | non pertinent |
| 3312 | Macian et al.,        | 2015 | Trials. 2015; 16:134                                                        | non pertinent |
| 3313 | Maas et al.,          | 2015 | BMC medical education. 2015; 15:203                                         | non pertinent |
| 3314 | Maas et al.,          | 2015 | Physiotherapy (united kingdom). 2015; 101:e921-e922                         | non pertinent |
| 3315 | Lv et al.,            | 2015 | International j of clinical and experimental medicine. 2015; 8(5):7359-7366 | non pertinent |
| 3316 | Luo et al.,           | 2015 | Chinese traditional and herbal drugs. 2015; 46(6):878-880                   | non pertinent |
| 3317 | Lunn et al.,          | 2015 | Anesthesiology. 2015; 122(4):884-894                                        | non pertinent |

|      |                    |      |                                                                                                                                                                                                                                                                                                                               |               |
|------|--------------------|------|-------------------------------------------------------------------------------------------------------------------------------------------------------------------------------------------------------------------------------------------------------------------------------------------------------------------------------|---------------|
| 3318 | Lund et al.,       | 2015 | Radiation oncology (london, england). 2015; 10(1)                                                                                                                                                                                                                                                                             | non pertinent |
| 3319 | Lueken et al.,     | 2015 | J of affective disorders. 2015; 184:182-192                                                                                                                                                                                                                                                                                   | non pertinent |
| 3320 | Lueken et al.,     | 2015 | J Neural Transm (Vienna). 2015; 122(1):135-144                                                                                                                                                                                                                                                                                | non pertinent |
| 3321 | Luckenbill et al., | 2015 | Archives of orthopaedic and trauma surgery. 2015; 135(4):455-464                                                                                                                                                                                                                                                              | non pertinent |
| 3322 | Loomba et al.,     | 2015 | Regional anesthesia and pain medicine. Conference: 40th annual regional anesthesia and acute pain medicine meeting of the american society of regional anesthesia and pain medicine, ASRA 2015 las vegas, NV united states. Conference start: 20150514. Conference end: 20150516. Conference publication (var.pagings); 40(5) | non pertinent |
| 3323 | Lonial et al.,     | 2015 | New England j of medicine. 2015; 373(7):621-631                                                                                                                                                                                                                                                                               | non pertinent |
| 3324 | Lomonte et al.,    | 2015 | J of rheumatology. 2015; 42(9):1677-1684                                                                                                                                                                                                                                                                                      | non pertinent |
| 3325 | Liu et al.,        | 2015 | J of neurosurgery. Spine. 2015; 23(1):94-98                                                                                                                                                                                                                                                                                   | non pertinent |
| 3326 | Lin et al.,        | 2015 | Internet interventions. 2015; 2(1):7-16                                                                                                                                                                                                                                                                                       | non pertinent |
| 3327 | Lin et al.,        | 2015 | Respiratory medicine. 2015; 109(1):44-53                                                                                                                                                                                                                                                                                      | non pertinent |
| 3328 | Lim et al.,        | 2015 | Cinical drug investigation. 2015; 35(12):833-842                                                                                                                                                                                                                                                                              | non pertinent |
| 3329 | Lim                | 2015 | Evidence-based medicine. 2015; 20(3):105                                                                                                                                                                                                                                                                                      | non pertinent |
| 3330 | Lier et al.,       | 2015 | Pain practice. 2015; 15(5):487-495                                                                                                                                                                                                                                                                                            | non pertinent |

|      |                      |      |                                                                               |               |
|------|----------------------|------|-------------------------------------------------------------------------------|---------------|
| 3331 | Liebowitz et al,     | 2015 | The lancet. Infectious diseases. 2015; 15(9):1041-1048                        | non pertinent |
| 3332 | Li et al.,           | 2015 | Frontiers in pharmacology. 2015; 6(NOV)                                       | non pertinent |
| 3333 | Levy et al,          | 2015 | Human vaccines & immunotherapeutics. 2015; 11(3):620-631                      | non pertinent |
| 3334 | Levkovitz et al.,    | 2015 | World psychiatry. 2015; 14(1):64-73                                           | non pertinent |
| 3335 | Leung et al.,        | 2015 | Trials. 2015; 16:200                                                          | non pertinent |
| 3336 | Letko et al.,        | 2015 | Ophthalmology. 2015; 122(5):939-948                                           | non pertinent |
| 3337 | Leroux-Roels et al., | 2015 | Vaccine. 2015; 33(4):577-584                                                  | non pertinent |
| 3338 | Leombruni et al.,    | 2015 | Clinical and experimental rheumatology. 2015; 33(1 Suppl 88):82-85            | non pertinent |
| 3339 | Leng et al,          | 2015 | Clinical J of Pain. 2015; 31(7):612-620                                       | non pertinent |
| 3340 | Leitgeb et al.,      | 2015 | Haematologica. 2015; 100:468                                                  | non pertinent |
| 3341 | Leffler et al,       | 2015 | Gastroenterology. 2015; 148(7):1311-1319.e1316                                | non pertinent |
| 3342 | Lee et al.,          | 2015 | Br J Anaesth. 2015; 114(4):663-668                                            | non pertinent |
| 3343 | Lee et al,           | 2015 | International j of hyperthermia. 2015; 31(8):869-874                          | non pertinent |
| 3344 | Lee et al,           | 2015 | Cancer. 2015; 121(3/*National Cancer Institute*):432-440                      | non pertinent |
| 3345 | Lee et al,           | 2015 | International j of clinical and experimental medicine. 2015; 8(8):12135-12148 | non pertinent |
| 3346 | Lee et al.,          | 2015 | Arch Gerontol Geriatr. 2015; 61(2):154-160                                    | non pertinent |
| 3347 | Lee et al.,          | 2015 | Physiol Behav. 2015; 140:148-155                                              | non pertinent |
| 3348 | Lee et al.,          | 2015 | World j of gastroenterology. 2015; 21(1):351-359                              | non pertinent |
| 3349 | Lee et al,           | 2015 | Spine j. 2015; 15(7):1519-1526                                                | non pertinent |



|      |                    |      |                                                                             |               |
|------|--------------------|------|-----------------------------------------------------------------------------|---------------|
| 3350 | Lee et al.,        | 2015 | Clinics and research in hepatology and gastroenterology. 2015; 39(2):237-24 | non pertinent |
| 3351 | Ledgerwood et al., | 2015 | Contemporary clinical trials. 2015; 44:112-118                              | non pertinent |
| 3352 | Ledgerwood et al., | 2015 | PLoS One. 10(5):e0125914                                                    | non pertinent |
| 3353 | Lechner et al.,    | 2015 | Evidence-based complementary and alternative medicine. 2015                 | non pertinent |
| 3354 | Le et al.,         | 2015 | J of clinical oncology. 2015; 33(12):1325-1333                              | non pertinent |
| 3355 | Lazaridou et al.,  | 2015 | J of pain. 2015; 16(4 SUPPL 1):105                                          | non pertinent |
| 3356 | Lauruskus et al.,  | 2015 | Physiotherapy (united kingdom). 2015; 101:e838-                             | non pertinent |
| 3357 | Lankhorst et al.,  | 2015 | Osteoarthritis and cartilage. 2015; 23:A375-                                | non pertinent |
| 3358 | Langley et al.,    | 2015 | J of the pediatric infectious diseases society. 2015; 4(3):242-251          | non pertinent |
| 3359 | Langenfeld et al., | 2015 | Trials. 16:233                                                              | non pertinent |
| 3360 | Lange et al.,      | 2015 | J of General Internal Medicine. 2015; 30:177-                               | non pertinent |
| 3361 | Lal et al.,        | 2015 | New England j of medicine. 2015; 372(22):2087-2096                          | non pertinent |
| 3362 | Lak et al.,        | 2015 | Trauma monthly. 2015; 20(2):12-16                                           | non pertinent |
| 3363 | Lacy et al.,       | 2015 | PLoS One. 2015; 10(7)                                                       | non pertinent |
| 3364 | Lacourt et al.,    | 2015 | Brain, behavior, and immunity. 2015; 44:32-36                               | non pertinent |
| 3365 | Kwako et al.,      | 2015 | Psychopharmacology (Berl). 2015; 232(1):295-304                             | non pertinent |
| 3366 | Kurmann et al.,    | 2015 | 157(1):144-154                                                              | non pertinent |
| 3367 | Kurganova et al.,  | 2015 | Zhurnal nevrologii i psikiatrii imeni S.S. Korsakova. 2015; 115(4):30-35    | non pertinent |
| 3368 | Kuoppamäki et al., | 2015 | J of neural transmission (vienna, austria : 1990). 122(12):1709-1714        | non pertinent |

|      |                   |      |                                                                             |               |
|------|-------------------|------|-----------------------------------------------------------------------------|---------------|
| 3369 | Kummar et al.,    | 2015 | Clinical cancer research. 2015; 21(7):1574-1582                             | non pertinent |
| 3370 | Kumar et al.,     | 2015 | Exp Brain Res. 2015; 233(6):1745-1759                                       | non pertinent |
| 3371 | Kukkonen et al.,  | 2015 | J Bone Joint Surg Am. 2015; 97(21):1729-1737                                | non pertinent |
| 3372 | Kucukoglu et al., | 2015 | Italian j of pediatrics. 2015; 41:61                                        | non pertinent |
| 3373 | Krug et al.,      | 2015 | New England j of medicine. 2015; 372(21):1987-1995                          | non pertinent |
| 3374 | Kroger et al.,    | 2015 | Neurology. 2015; 84(21):2124-2131                                           | non pertinent |
| 3375 | Kowatch et al.,   | 2015 | J of child and adolescent psychopharmacology. 2015; 25(4):306-313           | non pertinent |
| 3376 | Kovacheva et al., | 2015 | Anesthesiology. 2015; 123(1):92-100                                         | non pertinent |
| 3377 | Kotela et al.,    | 2015 | Biomed Res Int. 2015; 2015:165908                                           | non pertinent |
| 3378 | Koike et al.,     | 2015 | J of neurology. 2015; 262(3):752-759                                        | non pertinent |
| 3379 | Kogure et al.,    | 2015 | J of nippon medical school = nippon ika daigaku zasshi. 2015; 82(3):124-129 | non pertinent |
| 3380 | Koenig et al.,    | 2015 | BMC Psychiatry. 2015; 15:150                                                | non pertinent |
| 3381 | Koch et al.,      | 2015 | European neuropsychopharmacology. 2015; 25:266-267                          | non pertinent |
| 3382 | Klein et al.,     | 2015 | British j of dermatology. 2015; 173(1):192-200                              | non pertinent |
| 3383 | Klafke et al.,    | 2015 | Trials. 2015; 16(1)                                                         | non pertinent |
| 3384 | Kingsbury et al., | 2015 | Trials. 2015; 16:77                                                         | non pertinent |
| 3385 | Kimby et al.,     | 2015 | Leukemia & lymphoma. 2015; 56(9):2598-2607                                  | non pertinent |
| 3386 | Kim et al.,       | 2015 | Anticancer research. 2015; 35(6):3531-3536                                  | non pertinent |
| 3387 | Kim et al.,       | 2015 | Pharmacology. 2015; 96(1-2):68-75                                           | non pertinent |
| 3388 | Kim et al.,       | 2015 | Surgical endoscopy. 2015; 29(12):3795-3802                                  | non pertinent |
| 3389 | Kim et al.,       | 2015 | PLoS One. 2015; 10(4)                                                       | non pertinent |

|      |                              |      |                                                                                                                                                                                                                                                                                                                               |               |
|------|------------------------------|------|-------------------------------------------------------------------------------------------------------------------------------------------------------------------------------------------------------------------------------------------------------------------------------------------------------------------------------|---------------|
| 3390 | Kim et al.,                  | 2015 | Digestive diseases and sciences. 2015; 60(6):1724-1732                                                                                                                                                                                                                                                                        | non pertinent |
| 3391 | Kim et al.,                  | 2015 | Current medical research and opinion. 2015; 31(2):379-389                                                                                                                                                                                                                                                                     | non pertinent |
| 3392 | Kim et al.,                  | 2015 | BMC anesthesiology. 2015; 15:139                                                                                                                                                                                                                                                                                              | non pertinent |
| 3393 | Khodayari-Rostamabad et al., | 2015 | Anesthesiology. 2015; 122(1):140-149                                                                                                                                                                                                                                                                                          | non pertinent |
| 3394 | Khayat et al.,               | 2015 | Complementary therapies in medicine. 2015; 23(3):318-324                                                                                                                                                                                                                                                                      | non pertinent |
| 3395 | Khalili-Mahani et al.,       | 2015 | Neuroimage. 2015; 108:396-409                                                                                                                                                                                                                                                                                                 | non pertinent |
| 3396 | Kereiakes et al.,            | 2015 | American heart j. 2015; 169(6):906-915                                                                                                                                                                                                                                                                                        | non pertinent |
| 3397 | Kelly et al.,                | 2015 | Diabetes, obesity & metabolism. 2015; 17(4):414-422                                                                                                                                                                                                                                                                           | non pertinent |
| 3398 | Kehoe et al.,                | 2015 | Lancet (london, england). 2015; 386(9990):249-257                                                                                                                                                                                                                                                                             | non pertinent |
| 3399 | Kazandijan et al.,           | 2015 | J of clinical oncology. 2015; 33(15 SUPPL 1)                                                                                                                                                                                                                                                                                  | non pertinent |
| 3400 | Kaya et al.,                 | 2015 | Nephrology dialysis transplantation. 2015; 30:iii549                                                                                                                                                                                                                                                                          | non pertinent |
| 3401 | Kataria et al.,              | 2015 | Regional anesthesia and pain medicine. Conference: 40th annual regional anesthesia and acute pain medicine meeting of the american society of regional anesthesia and pain medicine. ASRA 2015 las vegas, NV united states. Conferece start: 20150514. Conference end: 20150516. Conference publication: (var.pagings):40(5 ) | non pertinent |
| 3402 | Kass-Iliyya et al.,          | 2015 | Parkinsonism Relat Disord. 2015; 21(12):1454-1460                                                                                                                                                                                                                                                                             | non pertinent |

|      |                     |      |                                                                                                      |               |
|------|---------------------|------|------------------------------------------------------------------------------------------------------|---------------|
| 3403 | Kashefi et al.,     | 2015 | Physiotherapy research: PTR. 2015; 29(1):114-119                                                     | non pertinent |
| 3404 | Karthikeyan et al., | 2015 | Circulation. 2015; 132                                                                               | non pertinent |
| 3405 | Karsdal et al.,     | 2015 | Osteoarthritis and cartilage. 2015; 23:A394-A395                                                     | non pertinent |
| 3406 | Karsdal et al.,     | 2015 | Osteoarthritis and cartilage. 2015; 23(4):550-558                                                    | non pertinent |
| 3407 | Kapil et al.,       | 2015 | Clinical therapeutics. 2015; 37(10):2286-2296                                                        | non pertinent |
| 3408 | Kang et al.,        | 2015 | Annals of oncology : official j of the european society for medical oncology. 2015; 26(12):2457-2463 | non pertinent |
| 3409 | Kanat et al.,       | 2015 | Neuropsychopharmacology. 2015; 40(11):2632-2638                                                      | non pertinent |
| 3410 | Kanamoto et al.,    | 2015 | J of ocular pharmacology and therapeutics. 2015; 31(3):156-164                                       | non pertinent |
| 3411 | Jund et al.,        | 2015 | Acta otolaryngologica. 2015; 135(1):42-50                                                            | non pertinent |
| 3412 | Jprn - Sakuhara     | 2015 | UMIN.-CTR Clinical Trial. 2015                                                                       | non pertinent |
| 3413 | Joura et al.,       | 2015 | New England j of medicine. 2015; 372(8):711-723                                                      | non pertinent |
| 3414 | Joe et al.,         | 2015 | Cancer prevention research (philadelphia, pa). 2015; 8(12):1131-1137                                 | non pertinent |
| 3415 | Jicha et al.,       | 2015 | Drug and alcohol dependence. 2015; 157:179-183                                                       | non pertinent |
| 3416 | Ji et al.,          | 2015 | J of clinical oncology. 2015; 33(34):4093-4098                                                       | non pertinent |
| 3417 | Jeyamohan et al.,   | 2015 | Neurosurg Spine. 2015; 23(2):137-143                                                                 | non pertinent |
| 3418 | Jensterie et al.,   | 2015 | Hormones. 2015; 14(1):81-90                                                                          | non pertinent |
| 3419 | Jenkins et al.,     | 2015 | Alimentary pharmacology & therapeutics. 2015; 41(7):636-648                                          | non pertinent |

|      |                                      |      |                                                              |               |
|------|--------------------------------------|------|--------------------------------------------------------------|---------------|
| 3420 | Jarvik et al.,                       | 2015 | Contemporary clinical trials. 2015; 45(Pt B):157-163         | non pertinent |
| 3421 | Jaramillo et al.,                    | 2015 | Brain Imaging Behav. 2015; 9(3):445-455                      | non pertinent |
| 3422 | Jaracz et al.,                       | 2015 | General hospital psychiatry. 2015; 37(1):36-39               | non pertinent |
| 3423 | Jackson et al.,                      | 2015 | Jama. 2015; 314(3):237-246                                   | non pertinent |
| 3424 | Jaberzadeh et al.,                   | 2015 | Brain stimulation. 2015; 8(2):337-338                        | non pertinent |
| 3425 | Izikson et al.,                      | 2015 | Vaccine. 2015; 33(48):6622-6628                              | non pertinent |
| 3426 | Iwamura et al.,                      | 2015 | BMC urology. 2015; 15:120                                    | non pertinent |
| 3427 | Isrctn – Critchley                   | 2015 | ISRCTN registry. 2015                                        | non pertinent |
| 3428 | Isrctn – Hunter                      | 2015 | ISRCTN registry. 2015                                        | non pertinent |
| 3429 | Isrctn – Kirkham                     | 2015 | ISRCTN registry. 2015                                        | non pertinent |
| 3430 | Isrctn - Bruin                       | 2015 | ISRCTN registry. 2015                                        | non pertinent |
| 3431 | Ishida et al.,                       | 2015 | Antimicrobial agents and chemotherapy. 2015; 59(8):4919-4929 | non pertinent |
| 3432 | Irct201505092216<br>5N - Nejatbakhsh | 2015 | Iranian Registry of Clinical Trials. 2015                    | non pertinent |
| 3433 | Irct201504142177<br>3N - Mozafari    | 2015 | Iranian Registry of Clinical Trials. 2015                    | non pertinent |
| 3434 | Irct201412102027<br>2N – Dahmardeh   | 2015 | Iranian Registry of Clinical Trials. 2015                    | non pertinent |
| 3435 | Irct201412021562<br>0N - Alireza     | 2015 | Iranian Registry of Clinical Trials. 2015                    | non pertinent |
| 3436 | Irct201411288729<br>N – Javadi       | 2015 | Iranian Registry of Clinical Trials. 2015                    | non pertinent |
| 3437 | Irct201406154443<br>N – Moghadam     | 2015 | Iranian Registry of Clinical Trials. 2015                    | non pertinent |
| 3438 | Inan et al.,                         | 2015 | Acta neurologica scandinavica. 2015; 132(4):270-277          | non pertinent |
| 3439 | Ichesco et al.,                      | 2015 | Arthritis and rheumatology. 2015; 67                         | non pertinent |
| 3440 | Hwang et al.,                        | 2015 | World neurosurgery. 2015; 83(1):108-113                      | non pertinent |
| 3441 | Hwang et al.,                        | 2015 | World j of gastroenterology. 2015; 21(35):10234-10241        | non pertinent |

|      |                   |      |                                                                              |               |
|------|-------------------|------|------------------------------------------------------------------------------|---------------|
| 3442 | Hurwitz et al.,   | 2015 | J of clinical oncology. 2015; 33(34):4039-4047                               | non pertinent |
| 3443 | Hurvitz et al.,   | 2015 | The lancet. Oncology. 2015; 16(7):816-829                                    | non pertinent |
| 3444 | Hurt et al.,      | 2015 | International j of radiation oncology, biology, physics. 2015; 93(4):810-818 | non pertinent |
| 3445 | Hunter et al.,    | 2015 | Gastroenterology. 2015; 148(2):324-333                                       | non pertinent |
| 3446 | Hunter et al.,    | 2015 | Osteoarthritis Cartilage. 2015; 23(7):1090-1098                              | non pertinent |
| 3447 | Hung et al.,      | 2015 | Nephrology, dialysis, transplantation. 2015; 30(2):266-274                   | non pertinent |
| 3448 | Hubacher et al.,  | 2015 | Contraception. 2015; 91(3):185-192                                           | non pertinent |
| 3449 | Huang et al.,     | 2015 | Gastroenterology. 2015; 148(4 SUPPL 1):678-679                               | non pertinent |
| 3450 | Hu et al.,        | 2015 | Plos neglected tropical diseases. 2015; 9(3)                                 | non pertinent |
| 3451 | Hu et al.,        | 2015 | PLoS One. 2015; 10(3):e0121264                                               | non pertinent |
| 3452 | Hu et al.,        | 2015 | Chinese j of tissue engineering research. 2015; 19(13):1995-1999             | non pertinent |
| 3453 | Hsu et al.,       | 2015 | PLoS One. 2015; 10(2)                                                        | non pertinent |
| 3454 | Hsin-Ti et al.,   | 2015 | Current pharmaceutical biotechnology. 2015; 16(12):1063-1069                 | non pertinent |
| 3455 | Hofmann et al.,   | 2015 | Contemporary clinical trials. 2015; 43:223-230                               | non pertinent |
| 3456 | Hoffmann et al.,  | 2015 | Circulation. 2015; 132                                                       | non pertinent |
| 3457 | Hodkinson et al., | 2015 | Pain. 2015; 156(7):1301-1310                                                 | non pertinent |
| 3458 | Hisey et al.,     | 2015 | J Spinal Disord Tech. 2015; 28(4):E237-243                                   | non pertinent |
| 3459 | Hill et al.,      | 2015 | J of clinical rheumatology. 2015; 21(3):120-125                              | non pertinent |
| 3460 | Hiemstra et al.,  | 2015 | European child & adolescent psychiatry. 2015; 24(1 SUPPL 1):162-163          | non pertinent |

|      |                         |      |                                                                                       |               |
|------|-------------------------|------|---------------------------------------------------------------------------------------|---------------|
| 3461 | Herren                  | 2015 | BMC proceedings. 2015; 9(3)                                                           | non pertinent |
| 3462 | Herigstad et al.,       | 2015 | Chest. 2015; 148(4):953-961                                                           | non pertinent |
| 3463 | Heo et al.,             | 2015 | J of gastroenterology and hepatology (australia). 2015; 30(9):1361-1366               | non pertinent |
| 3464 | Henningsson et al.,     | 2015 | Transl Psychiatry. 2015; 5:e688                                                       | non pertinent |
| 3465 | Helistrom et al.,       | 2015 | Urology. 2015; 86(2):291-298                                                          | non pertinent |
| 3466 | Heidrich et al.,        | 2015 | PLoS One. 2015; 10(6)                                                                 | non pertinent |
| 3467 | He et al.,              | 2015 | Clin Neurol Neurosurg. 2015; 134:130-135                                              | non pertinent |
| 3468 | He et al.,              | 2015 | Sleep. 2015; 38(3):423-431                                                            | non pertinent |
| 3469 | He et al.,              | 2015 | J of spinal disorders & techniques. 2015; 28(7):E427-432                              | non pertinent |
| 3470 | Hatemi et al.,          | 2015 | New England j of medicine. 2015; 372(16):1510-1518                                    | non pertinent |
| 3471 | Hartvickson et al.,     | 2015 | International j of infectious diseases. 2015; 41:65-72                                | non pertinent |
| 3472 | Harris et al.,          | 2015 | PLoS Med. 2015; 12(2):e1001783                                                        | non pertinent |
| 3473 | Harrington et al.,      | 2015 | Expert review of anticancer therapy. 2015; 15(12):1389-1403                           | non pertinent |
| 3474 | Hara et al.,            | 2015 | Physiotherapy (united kingdom). 2015; 101:e523-524                                    | non pertinent |
| 3475 | Hansen et al.,          | 2015 | Basic Clin Pharmacol Toxicol. 2015; 117(5):316-322                                    | non pertinent |
| 3476 | Hansen et al.,          | 2015 | Br J Clin Pharmacol. 2015; 79(6):926-936                                              | non pertinent |
| 3477 | Hansen                  | 2015 | BMC Complement Altern Med. 2015; Trials. 2015; 16:166                                 | non pertinent |
| 3478 | Hansen et al.,          | 2015 | Chotmaihet thangphaet (J of the Medical Association of Thailand). 2015; 98(8):734-738 | non pertinent |
| 3479 | Handprasertpong et al., | 2015 |                                                                                       | non pertinent |

|      |                           |      |                                                                                    |               |
|------|---------------------------|------|------------------------------------------------------------------------------------|---------------|
| 3480 | Handen et al.,            | 2015 | J of the American Academy of Child and Adolescent Psychiatry. 2015; 54(11):905-915 | non pertinent |
| 3481 | Han et al.,               | 2015 | Human vaccines and immunotherapeutics. 2015; 11(5):1094-1101                       | non pertinent |
| 3482 | Halota et al.,            | 2015 | J of viral hepatitis. 2015; 22(8):651-657                                          | non pertinent |
| 3483 | Halligan et al.,          | 2015 | Health technology assessment. 2015; 19(54)                                         | non pertinent |
| 3484 | Hale et al.,              | 2015 | J of pain research. 2015; 8:623-636                                                | non pertinent |
| 3485 | Halasa et al.,            | 2015 | J of the pediatric infectious diseases society. 2015; 4(3):214-224                 | non pertinent |
| 3486 | Hainsworth et al.,        | 2015 | Cancer. 2015; 121(10):1654-1661                                                    | non pertinent |
| 3487 | Hahn et al.,              | 2015 | JAMA Psychiatry. 2015; 72(1):68-74                                                 | non pertinent |
| 3488 | Hagenaars et al.,         | 2015 | Frontiers in Psychiatry. 2015; 6(JUN)                                              | non pertinent |
| 3489 | Hadi et al.,              | 2015 | International j of pediatric otorhinolaryngology. 2015; 79(5):671-676              | non pertinent |
| 3490 | Guo et al.,               | 2015 | Trials. 2015; 16:124                                                               | non pertinent |
| 3491 | Guevara-gutierrez et al., | 2015 | J of dermatological treatment. 2015; 26(6):548-550                                 | non pertinent |
| 3492 | Gudavalli et al.,         | 2015 | Trials. 2015; 16:259                                                               | non pertinent |
| 3493 | Guazzi et al.,            | 2015 | European j of oral implantology. 2015; 8(3):283-290                                | non pertinent |
| 3494 | Guan et al.,              | 2015 | PLoS One. 2015; 10(4):e0123675                                                     | non pertinent |
| 3495 | Gross et al.,             | 2015 | The lancet HIV. 2015; 2(1):e12-e19                                                 | non pertinent |
| 3496 | Grob et al.,              | 2015 | The lancet. Oncology. 2015; 16(13):1389-1398                                       | non pertinent |
| 3497 | Grillon et al.,           | 2015 | Neuropsychopharmacology. 2015; 40(5):1064-1071                                     | non pertinent |



|      |                             |      |                                                                                |               |
|------|-----------------------------|------|--------------------------------------------------------------------------------|---------------|
| 3498 | Grigg-Damberger et al.,     | 2015 | Child and adolescent psychiatric clinics of north america. 2015; 24(1):145-176 | non pertinent |
| 3499 | Green et al.,               | 2015 | Oncologist. 2015; 20(5):516-522                                                | non pertinent |
| 3500 | Green et al.,               | 2015 | J of clinical psychiatry. 2015; 76(10):1359-1365                               | non pertinent |
| 3501 | Graversen et al.,           | 2015 | Neuropsychobiology. 2015; 71(4):241-252                                        | non pertinent |
| 3502 | Graversen et al.,           | 2015 | Basic Clin Pharmacol Toxicol. 2015; 116(5):414-422                             | non pertinent |
| 3503 | Grant et al.,               | 2015 | J of clinical apheresis. 2015; 30(2):126-127                                   | non pertinent |
| 3504 | Grainger et al.,            | 2015 | Lancet (london, england). 2015; 386(10004):1649-1658                           | non pertinent |
| 3505 | Gracies et al.,             | 2015 | Lancet Neurol. 2015; 14(10):992-1001                                           | non pertinent |
| 3506 | Gough et al.,               | 2015 | JAMA surgery. 2015; 150(9):835-840                                             | non pertinent |
| 3507 | Gorse et al.,               | 2015 | Vaccine. 2015; 33(9):1151-1159                                                 | non pertinent |
| 3508 | Gorka et al.,               | 2015 | Neuropsychopharmacology. 2015; 40(2):278-286                                   | non pertinent |
| 3509 | Gorka et al.,               | 2015 | International j of neuropsychopharmacology. 2015; 18(3)                        | non pertinent |
| 3510 | Gorka et al.,               | 2015 | Neuropsychopharmacology. 2015; 40:447                                          | non pertinent |
| 3511 | Gong et al.,                | 2015 | J of arthroplasty. 2015; 30(11):1897-1901                                      | non pertinent |
| 3512 | Gollwitzer et al.,          | 2015 | J Bone Joint Surg Am. 2015; 97(9):701-708                                      | non pertinent |
| 3513 | Goldstein-Piekarski et al., | 2015 | Biological psychiatry. 2015; 77(9 SUPPL 1):243                                 | non pertinent |
| 3514 | Godeaux et al.,             | 2015 | Vaccine. 2015; 33(18):2189-2195                                                | non pertinent |
| 3515 | Gnant et al.,               | 2015 | Lancet. 2015; 386(9992):433-443                                                | non pertinent |
| 3516 | Gladkov et al.,             | 2015 | Oncologist. 2015; 21(1):7-15                                                   | non pertinent |
| 3517 | Gisbert et al.,             | 2015 | Alimentary pharmacology & therapeutics. 2015; 41(8):768-775                    | non pertinent |

|      |                        |      |                                                                                      |               |
|------|------------------------|------|--------------------------------------------------------------------------------------|---------------|
| 3518 | Gilron et al.,         | 2015 | Pain. 2015; 156(8):1440-1448                                                         | non pertinent |
| 3519 | Ghanima et al.,        | 2015 | Lancet (london, england). 2015; 385(9978):1653-1661                                  | non pertinent |
| 3520 | Ghaleiha et al.,       | 2015 | Psychiatry research. 2015; 229(1-2):181-187                                          | non pertinent |
| 3521 | Ghaeminia et al.,      | 2015 | J of cranio-maxillo-facial surgery. 2015; 43(10):2158-2167                           | non pertinent |
| 3522 | Genovese et al.,       | 2015 | J of clinical rheumatology. 2015; 21(5):231-238                                      | non pertinent |
| 3523 | Geng et al.,           | 2015 | Conf Proc IEEE Eng Med Biol Soc. 2015:2071-2074                                      | non pertinent |
| 3524 | Gaztanaga et al.,      | 2015 | Atherosclerosis. 2015; 240(1):53-60                                                  | non pertinent |
| 3525 | Gauvreau et al.,       | 2015 | American j of respiratory and critical care medicine. 2015; 191(2):161-167           | non pertinent |
| 3526 | Gatlin et al.,         | 2015 | Foot Ankle Int. 2015; 36(3):288-292                                                  | non pertinent |
| 3527 | Garland et al.,        | 2015 | J of behavioral medicine. 2015; 38(2):327-336                                        | non pertinent |
| 3528 | Garcia-Aguilar et al., | 2015 | Lancet oncology. 2015; 16(15):1537-1546                                              | non pertinent |
| 3529 | Garcia et al.,         | 2015 | Lancet oncology. 2015; 16(1):108-116                                                 | non pertinent |
| 3530 | Fukushima et al.,      | 2015 | Supportive care in cancer. 2015; 23(1 SUPPL 1):100                                   | non pertinent |
| 3531 | Fruhauf et al.,        | 2015 | J of the european academy of dermatology and venerology : JEADV. 2015; 29(5):919-924 | non pertinent |
| 3532 | Frey et al.,           | 2015 | Vaccine. 2015; 33(1):163-173                                                         | non pertinent |
| 3533 | Freeman et al.,        | 2015 | BMJ (online). 2015; 350                                                              | non pertinent |
| 3534 | Fredrickson et al.,    | 2015 | Anaesthesia and intensive care. 2015; 43(4):449-453                                  | non pertinent |
| 3535 | Frass et al.,          | 2015 | Complementary therapies in medicine. 2015; 23(3):309-317                             | non pertinent |
| 3536 | Fox et al.,            | 2015 | BMJ Open. 2015; 5(1)                                                                 | non pertinent |

|      |                     |      |                                                                   |               |
|------|---------------------|------|-------------------------------------------------------------------|---------------|
| 3537 | Forward et al.,     | 2015 | Perm J. 2015; 19(4):18-28                                         | non pertinent |
| 3538 | Forsth et al.,      | 2015 | European spine j. (var.pagings). 2015; 24(6 SUPPL 1):683          | non pertinent |
| 3539 | Forst et al.,       | 2015 | J of rehabilitation research and development. 2015; 52(4):397-406 | non pertinent |
| 3540 | Fonzo et al.,       | 2015 | Neuropsychopharmacology. 2015; 40:278-279                         | non pertinent |
| 3541 | Foerster et al.,    | 2015 | Arthritis and rheumatology. 2015; 67(2):576-581                   | non pertinent |
| 3542 | Florkiewicz et al., | 2015 | Acta anaesthesiologica Scandinavica. 2015; 59(8):999-1008         | non pertinent |
| 3543 | Fleming et al.,     | 2015 | Neurorehabilitation and neural repair. 2015; 29(2):143-152        | non pertinent |
| 3544 | Fleet et al.,       | 2015 | BJOG. 2015; 122(7):983-992                                        | non pertinent |
| 3545 | Flaherty et al.,    | 2015 | J of clinical oncology. 2015; 33(21):2384-2391                    | non pertinent |
| 3546 | Fisher et al.,      | 2015 | Neuropsychopharmacology. 2015; 40(6):1510-1518                    | non pertinent |
| 3547 | Finn et al.,        | 2015 | The lancet. Oncology. 2015; 16(1):25-35                           | non pertinent |
| 3548 | Feuerbach et al.,   | 2015 | British j of pharmacology. 2015; 172(5):1292-1304                 | non pertinent |
| 3549 | Feng et al.,        | 2015 | Dermatologic surgery. 2015; 41:56-63                              | non pertinent |
| 3550 | Fei et al.,         | 2015 | European j of gynaecological oncology. 2015; 36(4):442-446        | non pertinent |
| 3551 | Fehse et al.,       | 2015 | Pain medicine (united states). 2015; 16(10):1967-1974             | non pertinent |
| 3552 | Feger et al.,       | 2015 | Radiol. 2015; 25(7):2115-2124                                     | non pertinent |
| 3553 | Farell et al.,      | 2015 | Obesity surgery. 2015; 25(11):1996-1997                           | non pertinent |
| 3554 | Fang et al.,        | 2015 | Pain Pract. 2015; 15(7):595-603                                   | non pertinent |
| 3555 | Fald Elmula et al., | 2015 | J of hypertension. 2015; 33(12):2534-2545                         | non pertinent |
| 3556 | Everaerd et al.,    | 2015 | Neuroimage. 2015; 112:218-224                                     | non pertinent |

|      |                             |      |                                                                        |               |
|------|-----------------------------|------|------------------------------------------------------------------------|---------------|
| 3557 | Euctr N.L.                  | 2015 | EU Clinical Trials Register. 2015                                      | non pertinent |
| 3558 | Euctr G. B.                 | 2015 | EU Clinical Trials Register. 2015                                      | non pertinent |
| 3559 | Euctr G. B.                 | 2015 | EU Clinical Trials Register. 2015                                      | non pertinent |
| 3560 | Euctr F. R.                 | 2015 | EU Clinical Trials Register. 2015                                      | non pertinent |
| 3561 | Euctr F. R.                 | 2015 | EU Clinical Trials Register. 2015                                      | non pertinent |
| 3562 | Euctr F. R.                 | 2015 | EU Clinical Trials Register. 2015                                      | non pertinent |
| 3563 | Euctr F. R.                 | 2015 | EU Clinical Trials Register. 2015                                      | non pertinent |
| 3564 | Euctr E. S.                 | 2015 | EU Clinical Trials Register. 2015                                      | non pertinent |
| 3565 | Esposito et al.,            | 2015 | Eur J Oral Implantol. 2015; 8(3):257-268                               | non pertinent |
| 3566 | Emrich et al.,              | 2015 | Mmw-fortschritte der medizin. 2015; 157:9-16                           | non pertinent |
| 3567 | Embree et al.,              | 2015 | Clinical and vaccine immunology. 2015; 22(3):282-290                   | non pertinent |
| 3568 | Elsenbruch et al.,          | 2015 | Neurogastroenterology and motility. 2015; Pain. 2015; 156(7):1342-1347 | non pertinent |
| 3569 | Egorova et al.,             | 2015 | Diagn Intery Radiol. 2015; 21(3):215-221                               | non pertinent |
| 3570 | Egbers et al.,              | 2015 | Biological psychiatry. 2015; 77(9):47-                                 | non pertinent |
| 3571 | Eckstein et al.,            | 2015 | Biol Psychiatry. 2015; 78(3):194-202                                   | non pertinent |
| 3572 | Eckstein et al.,            | 2015 | Arthritis Rheumatol. 2015; 67(12):3184-3189                            | non pertinent |
| 3573 | Eckstein et al.,            | 2015 | European j of cancer (Oxford, England : 1990). 2015; 51(3):292-300     | non pertinent |
| 3574 | Eckhoff et al.,             | 2015 | BMC complementary and alternative medicine. 2015; 15:406               | non pertinent |
| 3575 | Eberl et al.,               | 2015 | JAMA – j of the american medical association. 2015; 313(7):687-694     | non pertinent |
| 3576 | Ebbert et al.,              | 2015 | Registro Brasileiro de Ensaios Clinicos. 2015                          | non pertinent |
| 3578 | R. B. R. dxp3k – de Freitas | 2015 |                                                                        |               |

|      |                      |      |                                                                          |               |
|------|----------------------|------|--------------------------------------------------------------------------|---------------|
| 3579 | Dwivedi et al,       | 2015 | International j of research in ayurveda and pharmacy. 2015; 6(2):157-160 | non pertinent |
| 3580 | Duffy et al,         | 2015 | Nutrition (Burbank, Los Angeles County, Calif.). 2015; 31(10):1247-1254  | non pertinent |
| 3581 | Drumond Marra et al, | 2015 | Behavioural neurology. 2015                                              | non pertinent |
| 3582 | Drks - Donath        | 2015 | Deutsches Register klinischer Studien. 2015                              | non pertinent |
| 3583 | Drks – Heissel       | 2015 | Deutsches Register klinischer Studien. 2015                              | non pertinent |
| 3584 | Drks – Straube       | 2015 | Deutsches Register klinischer Studien. 2015                              | non pertinent |
| 3585 | Drks – Szabo         | 2015 | Deutsches Register klinischer Studien. 2015                              | non pertinent |
| 3586 | Driban et al,        | 2015 | Arthritis and rheumatology. 2015; 67                                     | non pertinent |
| 3587 | Douglas et al,       | 2015 | New England j of medicine. 2015; 372(14):1291-1300                       | non pertinent |
| 3588 | Doring et al,        | 2015 | European j of pain (united kingdom). 2015; 19(7):966-972                 | non pertinent |
| 3589 | Donnell et al,       | 2015 | Brain stimulation. 2015; 8(6):1085-1092                                  | non pertinent |
| 3590 | Dongre et al,        | 2015 | Biomed research international. 2015;284154                               | non pertinent |
| 3591 | Dongol et al,        | 2015 | J of oral and maxillofacial surgery. 2015; 73(6):1124-1132               | non pertinent |
| 3592 | Doebele et al,       | 2015 | Cancer. 2015; 121(6):883-892                                             | non pertinent |
| 3593 | Do et al,            | 2015 | J of breast cancer. 2015; 18(1):87-96                                    | non pertinent |
| 3594 | Dixon-Gordon et al,  | 2015 | Compr Psychiatry. 2015;                                                  | non pertinent |
| 3595 | Dixon et al,         | 2015 | Respiratory research. 2015; 16(1)                                        | non pertinent |
| 3596 | Dingemans et al,     | 2015 | Annals of oncology. 2015; 26(11):2286-2293                               | non pertinent |
| 3597 | Dinat et al,         | 2015 | PLoS One. 2015; 10(5)                                                    | non pertinent |
| 3598 | Diers et al,         | 2015 | Brain Res. 2015; 1594:173-182                                            | non pertinent |

|      |                          |      |                                                                                                                                                                                                                                                                                                                                |               |
|------|--------------------------|------|--------------------------------------------------------------------------------------------------------------------------------------------------------------------------------------------------------------------------------------------------------------------------------------------------------------------------------|---------------|
| 3599 | Diaz-Piedra et al.,      | 2015 | Sleep. 2015; 38:A310                                                                                                                                                                                                                                                                                                           | non pertinent |
| 3600 | Di Vasta et al.,         | 2015 | Obstetrics and gynecology. 2015; 126(3):617-627                                                                                                                                                                                                                                                                                | non pertinent |
| 3601 | Deplanque et al.,        | 2015 | Annals of oncology : official j of the european society for medical oncology. 2015; 26(6):1194-1200                                                                                                                                                                                                                            | non pertinent |
| 3602 | Denduluri et al.,        | 2015 | Regional anesthesia and pain medicine. Conference: 40th annual regional anesthesia and acute pain medicine meeting of the american society of regional anesthesia and pain medicine, ASRA 2015 las vegas, NV united states. Conference start: 20150514. Conference end: 20150516. Conference publication: (var.pagings); 40(5) | non pertinent |
| 3603 | Della Negra et al.,      | 2015 | Pediatric infectious disease j. 2015; 34(4):398-405                                                                                                                                                                                                                                                                            | non pertinent |
| 3604 | Del Valle Rubido et al., | 2015 | European neuropsychopharmacology. 2015; 25:646-647                                                                                                                                                                                                                                                                             | non pertinent |
| 3605 | Deichmann et al.,        | 2015 | Vaccine. 2015; 33(20):2379-2386                                                                                                                                                                                                                                                                                                | non pertinent |
| 3606 | Deftereos et al.,        | 2015 | Circulation. 2015; 132(15):1395-1403                                                                                                                                                                                                                                                                                           | non pertinent |
| 3607 | De Wolf et al.,          | 2015 | Radiotherapy and oncology. 2015; 115:27                                                                                                                                                                                                                                                                                        | non pertinent |
| 3608 | De Silva et al.,         | 2015 | British j of cancer. 2015; 113(9):1305-1312                                                                                                                                                                                                                                                                                    | non pertinent |
| 3609 | De Lange-Brokaar et al., | 2015 | Arthritis Rheumatol. 2015; 67(3):733-740                                                                                                                                                                                                                                                                                       | non pertinent |
| 3610 | De La Garza et al.,      | 2015 | Progress in neuro-psychopharmacology & biological psychiatry. 2015; 59:40-48                                                                                                                                                                                                                                                   | non pertinent |

|      |                          |      |                                                                        |               |
|------|--------------------------|------|------------------------------------------------------------------------|---------------|
| 3611 | De Kleine et al.,        | 2015 | J of anxiety disorders. 2015; 34:63-67                                 | non pertinent |
| 3612 | De Dreu et al.,          | 2015 | Soc Cogn Affect Neurosci. 2015; 10(5):721-728                          | non pertinent |
| 3613 | De Bejczy et al.,        | 2015 | Alcoholism, clinical and experimental research. 2015; 39(11):2189-2199 | non pertinent |
| 3614 | Davis et al.,            | 2015 | European j of cancer (Oxford, England : 1990). 2015; 51(13):1794-1802  | non pertinent |
| 3615 | Davies et al.,           | 2015 | Jama. 2015; 314(7):687-699                                             | non pertinent |
| 3616 | Das et al.,              | 2015 | European j of anaesthesiology. 2015; 32(4):278-280                     | non pertinent |
| 3617 | Danese et al.,           | 2015 | Gut. 2015; 64(2):243-249                                               | non pertinent |
| 3618 | Dahlke et al.,           | 2015 | J of clinical pharmacology. 2015; 55(4):415-422                        | non pertinent |
| 3619 | Da Silva Ribeiro et al., | 2015 | Topics in stroke rehabilitation. 2015; 22(4):299-305                   | non pertinent |
| 3620 | D'Haens et al.,          | 2015 | Gut. 2015; 64(8):1227-1235                                             | non pertinent |
| 3621 | Currow et al.,           | 2015 | J of pain and symptom management. 2015; 49(5):814-821                  | non pertinent |
| 3622 | Crunelle et al.,         | 2015 | Human brain mapping. 2015; 36(10):4222-4230                            | non pertinent |
| 3623 | Crockett et al.,         | 2015 | Curr Biol. 2015; 25(14):1852-1859                                      | non pertinent |
| 3624 | Crevat et al.,           | 2015 | Pediatric infectious disease j. 2015; 34(8):884-892                    | non pertinent |
| 3625 | Cozzi et al.,            | 2015 | Joint, bone, spine. 2015; 82(2):104-108                                | non pertinent |
| 3626 | Coughtrey et al.,        | 2015 | Behav Cogn Psychother. 2015; 43(3):257-269                             | non pertinent |
| 3627 | Cotreau et al.,          | 2015 | Clinical pharmacology in drug development. 2015; 4(2):137-142          | non pertinent |
| 3628 | Cortes et al.,           | 2015 | Breast cancer research and treatment. 2015; 154(3):509-520             | non pertinent |

|      |                      |      |                                                                               |               |
|------|----------------------|------|-------------------------------------------------------------------------------|---------------|
| 3629 | Corte et al.,        | 2015 | Respiratory research. 2015; 16(1)                                             | non pertinent |
| 3630 | Corli et al.,        | 2015 | J Rheumatol. 2015; 42(12):2376-2382                                           | non pertinent |
| 3631 | Cömert Kilic et al., | 2015 | J of oral and maxillofacial surgery. 2015; 73(8):1473-1483                    | non pertinent |
| 3632 | Combs et al.,        | 2015 | American j of obstetrics and gynecology. 2015; 213(3):364e361-364e312         | non pertinent |
| 3633 | Collins et al.,      | 2015 | British j of haematology. 2015; 170(6):886-890                                | non pertinent |
| 3634 | Clavijo et al.,      | 2015 | Cardiovascular revascularization medicine. 2015; 16(8):450-454                | non pertinent |
| 3635 | Clark-Elford et al., | 2015 | International j of neuropsychopharmacology. 2015; 18(2):1-7                   | non pertinent |
| 3636 | Chu et al.,          | 2015 | Drug Alcohol Depend. 2015; 153:314-322                                        | non pertinent |
| 3637 | Chowdhury et al.,    | 2015 | Annals of indian academy of neurology. 2015; 18(6 SUPPL 1):79                 | non pertinent |
| 3638 | Chow et al.,         | 2015 | The lancet. Oncology. 2015; 16(15):1463-1472                                  | non pertinent |
| 3639 | Childress et al.,    | 2015 | J of child and adolescent psychopharmacology. 2015; 25(5):402-414             | non pertinent |
| 3640 | Chen et al.,         | 2015 | Mol Pain. 2015; 11:67                                                         | non pertinent |
| 3641 | Chen et al.,         | 2015 | Zhongguo zhen jiu (Chinese acupuncture & moxibustion). 2015; 35(10):1005-1009 | non pertinent |
| 3642 | Chen et al.,         | 2015 | J of cataract and refractive surgery. 2015; 41(2):415-421                     | non pertinent |
| 3643 | Chapman et al.,      | 2015 | Lancet. 2015; 386(9991):360-368                                               | non pertinent |
| 3644 | Chang et al.,        | 2015 | Turkish j of gastroenterology. 2015; 26(5):417-422                            | non pertinent |
| 3645 | Chang et al.,        | 2015 | Pain medicine (Malden, Mass.). 2015; 16(12):2397-2404                         | non pertinent |



|      |                        |      |                                                                                |               |
|------|------------------------|------|--------------------------------------------------------------------------------|---------------|
| 3646 | Chandra et al.,        | 2015 | Malaria j. 2015; 14:108                                                        | non pertinent |
| 3647 | Chandar et al.,        | 2015 | J of pediatric gastroenterology and nutrition. 2015; 60(6):762-768             | non pertinent |
| 3648 | Cesne et al.,          | 2015 | Lancet oncology. 2015; 16(3):312-319                                           | non pertinent |
| 3649 | Cerit et al.,          | 2015 | European neuropsychopharmacology. 2015; 25(12):2289-2299                       | non pertinent |
| 3650 | Celik et al.,          | 2015 | Biomed research international. 2015; 349806                                    | non pertinent |
| 3651 | Ceko et al.,           | 2015 | J Neurosci. 2015; 35(33):11595-11605                                           | non pertinent |
| 3652 | Catus et al.,          | 2015 | The lancet neurology. 2015; 14(10):992-1001                                    | non pertinent |
| 3653 | Castelo-Branco et al., | 2015 | Maturitas. 2015; 81(1):76-82                                                   | non pertinent |
| 3654 | Case et al.,           | 2015 | Neuromuscular disorders. 2015; 25(4):321-332                                   | non pertinent |
| 3655 | Cao et al.,            | 2015 | Scandinavian j of gastroenterology. 2015; 50(10):1185-1190                     | non pertinent |
| 3656 | Calvaruso et al.,      | 2015 | American j of hematology. 2015; 90(7):634-638                                  | non pertinent |
| 3657 | Calcaterra et al.,     | 2015 | PLoS One. 2015; 10(6):e0125813                                                 | non pertinent |
| 3658 | Cakir-Özkan et al.,    | 2015 | J of craniofacial surgery. 2015; 26(7):e595-599                                | non pertinent |
| 3659 | Cai et al.,            | 2015 | International j of clinical pharmacology and therapeutics. 2015; 53(9):765-771 | non pertinent |
| 3660 | Cady et al.,           | 2015 | Headache. 2015; 55(4):529-542                                                  | non pertinent |
| 3661 | Byrne et al.,          | 2015 | Depression and anxiety. 2015; 32(6):408-414                                    | non pertinent |
| 3662 | Butchart et al.,       | 2015 | Neurology. 2015; 84(21):2161-2168                                              | non pertinent |
| 3663 | Burton et al.,         | 2015 | American j of medical genetics. Part a. 2015; 167A(10):2272-2281               | non pertinent |
| 3664 | Burmester et al.,      | 2015 | Annals of the rheumatic diseases. 2015; 74(6):1037-1044                        | non pertinent |

|      |                       |      |                                                                    |               |
|------|-----------------------|------|--------------------------------------------------------------------|---------------|
| 3665 | Burfein et al.,       | 2015 | J of sport rehabilitation. 2015; 24(4):405-412                     | non pertinent |
| 3666 | Budde et al.,         | 2015 | Clinical nephrology. 2015; 83(1):11-21                             | non pertinent |
| 3667 | Brunner et al.,       | 2015 | Arthritis & rheumatology (hoboken, N.J.). 2015; 67(5):1377-1385    | non pertinent |
| 3668 | Bruix et al.,         | 2015 | The lancet. Oncology. 2015; 16(13):1344-1354                       | non pertinent |
| 3669 | Bruehl et al.,        | 2015 | J of Pain. 2015; 16(7):666-675                                     | non pertinent |
| 3670 | Broom et al.,         | 2015 | Clinical genitourinary cancer. 2015; 13(1):50-58                   | non pertinent |
| 3671 | Brodaty               | 2015 | International psychogeriatrics. 2015; 27:22-23                     | non pertinent |
| 3672 | Brenke et al.,        | 2015 | European spine j. 2015; 24(12):2832-2840                           | non pertinent |
| 3673 | Brayer et al.,        | 2015 | American j of hematology. 2015; 90(7):602-607                      | non pertinent |
| 3674 | Brandao Filho et al., | 2015 | Trials. 2015; 16:415                                               | non pertinent |
| 3675 | Bradley et al.,       | 2015 | The lancet. Oncology. 2015; 16(2):187-199                          | non pertinent |
| 3676 | Bradfield et al.,     | 2015 | Pediatric blood & cancer. 2015; 62(6):1004-1010                    | non pertinent |
| 3677 | Boyle et al.,         | 2015 | European j of cancer (Oxford, England : 1990). 2015; 51(6):685-696 | non pertinent |
| 3678 | Bottelier et al.,     | 2015 | European neuropsychopharmacology. 2015; 25:461-462                 | non pertinent |
| 3679 | Bochicchio et al.,    | 2015 | J of the american college of surgeons. 2015; 220(1):70-81          | non pertinent |
| 3680 | Blay et al.,          | 2015 | The lancet. Oncology. 2015; 16(5):531-540                          | non pertinent |
| 3681 | Bissonnette et al.,   | 2015 | British j of dermatology. 2015; 172(5):1395-1406                   | non pertinent |
| 3682 | Bilen et al.,         | 2015 | Cancer. 2015; 121(1):69-76                                         | non pertinent |
| 3683 | Bhosale et al.,       | 2015 | J Basic Clin Physiol Pharmacol. 2015; 26(3):217-222                | non pertinent |

|      |                       |      |                                                                                                                                                                                                                                                                                                                                |               |
|------|-----------------------|------|--------------------------------------------------------------------------------------------------------------------------------------------------------------------------------------------------------------------------------------------------------------------------------------------------------------------------------|---------------|
| 3684 | Beydon et al.,        | 2015 | Anaesthesia, critical care & pain medicine. 2015; 34(3):165-171                                                                                                                                                                                                                                                                | non pertinent |
| 3685 | Berwouts et al.,      | 2015 | Radiotherapy and oncology. 2015; 115(2):272-278                                                                                                                                                                                                                                                                                | non pertinent |
| 3686 | Berthelot et al.,     | 2015 | Joint, bone, spine. 2015; 82(6):397-401                                                                                                                                                                                                                                                                                        | non pertinent |
| 3687 | Bernhard et al.,      | 2015 | The lancet. Oncology. 2015; 16(7):848-858                                                                                                                                                                                                                                                                                      | non pertinent |
| 3688 | Bernasconi et al.,    | 2015 | European neuropsychopharmacology. 2015; 25(4):474-482                                                                                                                                                                                                                                                                          | non pertinent |
| 3689 | Berlit et al.,        | 2015 | Archives of gynecology and obstetrics. 2015; 291(3):585-590                                                                                                                                                                                                                                                                    | non pertinent |
| 3690 | Bergman et al.,       | 2015 | BMC Public Health. 2015; 15:632                                                                                                                                                                                                                                                                                                | non pertinent |
| 3691 | Bergeron et al.,      | 2015 | American j of respiratory and critical care medicine. 2015; 191(11):1242-1249                                                                                                                                                                                                                                                  | non pertinent |
| 3692 | Bezon et al.,         | 2015 | Regional anesthesia and pain medicine. Conference: 40th annual regional anesthesia and acute pain medicine meeting of the american society of regional anesthesia and pain medicine. ASRA 2015 las vegas, NV united states. Conference start: 20150514. Conference end: 20150516. Conference publication: (var.pagings); 40(5) | non pertinent |
| 3693 | Benson et al.,        | 2015 | Brain Behav Immun. 2015; 48:222-231                                                                                                                                                                                                                                                                                            | non pertinent |
| 3694 | Benitez-Camps et al., | 2015 | BMC cardiovascular disorders. 2015; 15(1)                                                                                                                                                                                                                                                                                      | non pertinent |

|      |                        |      |                                                                                     |               |
|------|------------------------|------|-------------------------------------------------------------------------------------|---------------|
| 3695 | Bender Ignacio et al., | 2015 | J of infectious diseases. 2015; 212(12):1949-1956                                   | non pertinent |
| 3696 | Belkouch et al.,       | 2015 | Pan african medical j. 2015; 20                                                     | non pertinent |
| 3697 | Beinert et al.,        | 2015 | Eur J Phys Rehabil Med. 2015; 51(6):825-832                                         | non pertinent |
| 3698 | Becker et al.,         | 2015 | The lancet. Diabetes & endocrinology. 2015; 3(12):948-957                           | non pertinent |
| 3699 | Bear et al.,           | 2015 | The lancet. Oncology. 2015; 16(9):1037-1048                                         | non pertinent |
| 3700 | Bayer et al.,          | 2015 | Obstetrics and gynecology. 2015; 126(1):37-46                                       | non pertinent |
| 3701 | Bauer et al.,          | 2015 | American j of tropical medicine and hygiene. 2015; 93(3):441-453                    | non pertinent |
| 3702 | Basgol et al.,         | 2015 | International urogynecology j and pelvic floor dysfunction. 2015; 26(1 SUPPL 1):113 | non pertinent |
| 3703 | Baron et al.,          | 2015 | Pain practice. 2015; 15(5):455-470                                                  | non pertinent |
| 3704 | Bannwarth et al.,      | 2015 | Rheumatology (united kingdom). 2015; 54(11):2116-2117                               | non pertinent |
| 3705 | Bamford et al.,        | 2015 | J of psychopharmacology (Oxford, England). 2015; 29(5):634-641                      | non pertinent |
| 3706 | Balta et al.,          | 2015 | American surgeon. 2015; 81(2):182-186                                               | non pertinent |
| 3707 | Ball et al.,           | 2015 | Health technology assessment. 2015; 19(12):1-187                                    | non pertinent |
| 3708 | Baker et al.,          | 2015 | J Oral Rehabil. 2015; 42(10):742-750                                                | non pertinent |
| 3709 | Baker et al.,          | 2015 | European j of integrative medicine. 2015; 7(2):136-142                              | non pertinent |
| 3710 | Bai et al.,            | 2015 | Asian j of andrology. 2015; 17(1):61-67                                             | non pertinent |
| 3711 | Bagger-Sjoberg et al., | 2015 | PLoS One. 2015; 10(3)                                                               | non pertinent |

|      |                     |      |                                                                       |               |
|------|---------------------|------|-----------------------------------------------------------------------|---------------|
| 3712 | Bae et al.,         | 2015 | Spine (Phila Pa 1976). 2015; 40(11):759-766                           | non pertinent |
| 3713 | Avallone et al.,    | 2015 | Oncotarget. 2015; 6(30):30394-30407                                   | non pertinent |
| 3714 | Ataei et al.,       | 2015 | Hematological oncology. 2015; 33(2):67-74                             | non pertinent |
| 3715 | Ashford et al.,     | 2015 | Physiotherapy. 2015; 101(1):88-94                                     | non pertinent |
| 3716 | Ash et al.,         | 2015 | Kidney international. 2015; 88(2):404-411                             | non pertinent |
| 3717 | Arnold et al.,      | 2015 | Pediatric rheumatology. 2015; 13(1)                                   | non pertinent |
| 3718 | Arakane et al.,     | 2015 | Vaccine. 2015; 33(46):6340-6350                                       | non pertinent |
| 3719 | Antoun et al.,      | 2015 | European j of cancer (Oxford, England : 1990). 2015; 51(17):2570-2577 | non pertinent |
| 3720 | Anota et al.,       | 2015 | PLoS One. 2015; 10(5)                                                 | non pertinent |
| 3721 | Andrews et al.,     | 2015 | N Engl J Med. 2015; 373(25):2403-2412                                 | non pertinent |
| 3722 | Andersson et al.,   | 2015 | JAMA Psychiatry. 2015; 72(7):659-667                                  | non pertinent |
| 3723 | Anderson et al.,    | 2015 | Drug and alcohol dependence. 2015; 150:170-174                        | non pertinent |
| 3724 | Anagnostou et al.,  | 2015 | Lancet. 2015; 383(9925):1297-1304                                     | non pertinent |
| 3725 | Altafini et al.,    | 2015 | Clinical ophthalmology (auckland, N.Z.). 2015; 9:2263-2270            | non pertinent |
| 3726 | Alsohaibani et al., | 2015 | Saudi j of gastroenterology. 2015; 21(4):220-225                      | non pertinent |
| 3727 | Allen et al.,       | 2015 | Physiotherapy (united kingdom). 2015; 101:e55-e56                     | non pertinent |
| 3728 | Allen et al.,       | 2015 | Can J Anaesth. 2015; 62(11):1169-1178                                 | non pertinent |
| 3729 | Ali et al.,         | 2015 | BMJ Open. 2015; 5(7):e008254                                          | non pertinent |
| 3730 | Alam et al.,        | 2015 | JAMA dermatology. 2015; 151(11):1194-1199                             | non pertinent |

|      |                       |      |                                                                  |               |
|------|-----------------------|------|------------------------------------------------------------------|---------------|
| 3731 | Aktas et al.,         | 2015 | European j of gastroenterology & hepatology. 2015; 27(7):769-775 | non pertinent |
| 3732 | Akcam et al.,         | 2015 | Saudi medical j. 2015; 36(3):286-290                             | non pertinent |
| 3733 | Aiello et al.,        | 2015 | JAMA ophthalmology. 2015; 133(8):888-896                         | non pertinent |
| 3734 | Aichinger et al.,     | 2015 | Clinical and vaccine immunology. 2015; 22(1):46-55               | non pertinent |
| 3735 | Actrn – Howe          | 2015 | Australian New Zealand Clinical Trials Registry. 2015            | non pertinent |
| 3736 | Actrn – Hochsprung    | 2015 | Australian New Zealand Clinical Trials Registry. 2015            | non pertinent |
| 3737 | Acheson et al.,       | 2015 | Depression and anxiety. 2015; 32(6):400-407                      | non pertinent |
| 3738 | Aboltins et al.,      | 2015 | J of antimicrobial chemotherapy. 2015; 70(2):581-586             | non pertinent |
| 3739 | Abdulqawi et al.,     | 2015 | Lancet (london, england). 2015; 385(9974):1198-1205              | non pertinent |
| 3740 | Abdel-Ghaffar et al., | 2015 | Clinical otolaryngology. 2015; 40(3):219-226                     | non pertinent |
| 3741 | Abane et al.,         | 2015 | The bone & joint j. 2015; 97-B(1):56-63                          | non pertinent |
| 3742 | Westberg et al.,      | 2015 | Clinical infectious diseases. 2015 Jun; 60(12):1752-1759         | non pertinent |
| 3743 | Adamson et al.,       | 2015 | Lancet (london, england). 2015; 385(9985):2383-2391              | non pertinent |
| 3744 | Zhong et al.,         | 2015 | Tohoku j of experimental medicine. 2015 Oct; 237(3):183-191      | non pertinent |
| 3745 | Wirth et al.,         | 2015 | European urology. 2015 Mar; 67(3):482-491                        | non pertinent |
| 3746 | Budoff et al.,        | 2015 | Coronary artery disease. 2015 Dec; 26(4):301-307                 | non pertinent |

|      |                          |      |                                                                              |               |
|------|--------------------------|------|------------------------------------------------------------------------------|---------------|
| 3747 | Carbajal et al,          | 2015 | The lancet respiratory medicine. 2015 Oct; 3(10):796-812                     | non pertinent |
| 3748 | Zeiders et al,           | 2015 | International j of pediatric otorhinolaryngology. 2015 Dec; 79(12):2416-2423 | non pertinent |
| 3749 | Bennett et al,           | 2015 | Drug design, development and therapy. 2015; 9:4639-4647                      | non pertinent |
| 3750 | Attipoe et al,           | 2015 | Annals of the rheumatic diseases. 2015; 74(SUPPL 2):987                      | non pertinent |
| 3751 | Farnia et al,            | 2015 | Pharmacopsychiatry. 2015; 48:156-163                                         | non pertinent |
| 3752 | Saad et al,              | 2015 | Lancet oncology. 2015; 16(3):338-348                                         | non pertinent |
| 3753 | Panagopoulos et al,      | 2015 | European j of pain (united kingdom). 2015; 19(7):899-907                     | non pertinent |
| 3754 | Norton et al,            | 2015 | Spine. 2015; 40(10):726-733                                                  | non pertinent |
| 3755 | ?                        | 2015 | Current psychiatry. 2015; 14(3):41-42                                        | non pertinent |
| 3756 | SCOT-HEART investigators | 2015 | Lancet. 2015; 385(9985):2383-2391                                            | non pertinent |
| 3757 | Zorzi et al,             | 2014 | Osteoarthritis and cartilage. 2014; 22:194                                   | non pertinent |
| 3758 | Zoric et al,             | 2014 | British j of anaesthesia. 2014; 112(4):722-728                               | non pertinent |
| 3759 | Zivadinov et al,         | 2014 | PLoS One. 2014; 9(3)                                                         | non pertinent |
| 3760 | Zhu et al,               | 2014 | BMC Complement Altern Med. 2014; BMC                                         | non pertinent |
| 3761 | Zhu et al,               | 2014 | complementary and alternative medicine. 2014; 14                             | non pertinent |
| 3762 | Zhu et al,               | 2014 | The lancet. Oncology. 2014; 15(6):612-619                                    | non pertinent |
| 3763 | Zhu et al,               | 2014 | New England j of medicine. 2014; 370(9):818-828                              | non pertinent |
| 3764 | Zhao et al,              | 2014 | PLoS One. 2014; 9(6):e99538                                                  | non pertinent |
| 3765 | Zhang et al,             | 2014 | Magn Reson Imaging. 2014; 32(4):359-365                                      | non pertinent |

|      |                    |      |                                                                                                                  |               |
|------|--------------------|------|------------------------------------------------------------------------------------------------------------------|---------------|
| 3766 | Zhang et al.,      | 2014 | Zhongguo gu shang (China j of orthopaedics and traumatology). 2014; 27(1):38-40                                  | non pertinent |
| 3767 | Zhang et al.,      | 2014 | J of clinical pharmacology. 2014; 54(4):415-421                                                                  | non pertinent |
| 3768 | Zhang et al.,      | 2014 | Minimally invasive therapy & allied technologies: MITAT. 2014; 23(3):173-178                                     | non pertinent |
| 3769 | Zhang et al.,      | 2014 | J Popul Ther Clin Pharmacol. 2014; 21(3):e346-356                                                                | non pertinent |
| 3770 | Zhang et al.,      | 2014 | Neurological sciences. 2014; 35(8):1209-1214                                                                     | non pertinent |
| 3771 | Zeng et al.,       | 2014 | Zhongguo xiu fu chong jian wai ke za zhi (Chinese j of reparative and reconstructive surgery). 2014; 28(1):74-78 | non pertinent |
| 3772 | Zeinoddini et al., | 2014 | J of psychiatric research. 2014; 59:125-131                                                                      | non pertinent |
| 3773 | Yuvaraj et al.,    | 2014 | Behavioral and brain functions. 2014; 10(1)                                                                      | non pertinent |
| 3774 | Yu et al.,         | 2014 | J of gastroenterology and hepatology. 2014; 29(6):1200-1206                                                      | non pertinent |
| 3775 | Yoon et al.,       | 2014 | Neurorehabil Neural Repair. 2014; 28(3):250-259                                                                  | non pertinent |
| 3776 | Yee et al.,        | 2014 | British j of haematology. 2014; 166(3):401-409                                                                   | non pertinent |
| 3777 | Yang et al.,       | 2014 | Statistics in medicine. 2014; 33(20):3547-3555                                                                   | non pertinent |
| 3778 | Yang et al.,       | 2014 | J of international medicine research. 2014; 42(2):307-319                                                        | non pertinent |
| 3779 | Wynn et al.,       | 2014 | Neuropsychopharmacology. 2014; 39:502                                                                            | non pertinent |
| 3780 | Wylde et al.,      | 2014 | Osteoarthritis and cartilage. 2014; 22:433-                                                                      | non pertinent |
| 3781 | Wu et al.,         | 2014 | Anesthesia and Analgesia. 2014; 119(3):686-692                                                                   | non pertinent |



|      |                         |      |                                                                                    |               |
|------|-------------------------|------|------------------------------------------------------------------------------------|---------------|
| 3782 | Wu et al.,              | 2014 | The lancet.<br>Oncology. 2014;<br>15(2):213-222                                    | non pertinent |
| 3783 | Wu et al.,              | 2014 | Brain stimulation.<br>2014; 7(2):212-<br>218                                       | non pertinent |
| 3784 | Wu et al.,              | 2014 | Pediatrics<br>international.<br>2014; 56(3):315-<br>322                            | non pertinent |
| 3785 | Wu et al.,              | 2014 | Helicobacter.<br>2014; 19(3):207-<br>213                                           | non pertinent |
| 3786 | Wu et al.,              | 2014 | Complementary<br>therapies in<br>medicine. 2014;<br>22(3):456-462                  | non pertinent |
| 3787 | Wu et al.,              | 2014 | Molecular and<br>clinical oncology.<br>2014; 2(5):695-<br>700                      | non pertinent |
| 3788 | Wood et al.,            | 2014 | Emotion. 2014;<br>14(4):693-700                                                    | non pertinent |
| 3789 | Wojtysiak et al.,       | 2014 | Spine. 39(21):1792-<br>1800                                                        | non pertinent |
| 3790 | Winter et al.,          | 2014 | J of pediatric<br>gastroenterology<br>and nutrition.<br>2014; 59(6):767-<br>772    | non pertinent |
| 3791 | Winhusen et al.,        | 2014 | J of clinical<br>psychiatry. 2014;<br>75(7):757-764                                | non pertinent |
| 3792 | Winhusen et al.,        | 2014 | J of clinical<br>psychiatry. 2014;<br>75(4):336-343                                | non pertinent |
| 3793 | Winchester et al.,      | 2014 | J of pharmacology<br>and experimental<br>therapeutics.<br>2014; 351(2):259-<br>269 | non pertinent |
| 3794 | Williams et al.,        | 2014 | Lancet (london,<br>england). 2014;<br>384(9954):1586-<br>1596                      | non pertinent |
| 3795 | Wilke et al.,           | 2014 | The lancet.<br>Oncology. 2014;<br>15(11):1224-1235                                 | non pertinent |
| 3796 | Wilder-Smith et<br>al., | 2014 | Neurogastroenter<br>ol Motil. 2014;<br>26(4):489-498                               | non pertinent |
| 3797 | Wigal et al.,           | 2014 | J of child and<br>adolescent<br>psychopharmacol<br>ogy. 2014;<br>24(10):562-569    | non pertinent |
| 3798 | Wierckx et al.,         | 2014 | J of sexual<br>medicine. 2014;<br>11(8):1999-2011                                  | non pertinent |
| 3799 | Widemann et al.,        | 2014 | Neuro-oncology.<br>2014; 16(5):707-<br>718                                         | non pertinent |

|      |                       |      |                                                              |               |
|------|-----------------------|------|--------------------------------------------------------------|---------------|
| 3800 | Wick et al.,          | 2014 | Clinical cancer research. 2014; 20(24):6304-6313             | non pertinent |
| 3801 | Wibbenmeyer et al.,   | 2014 | J of burn care & research. 2014; 35(2):136-142               | non pertinent |
| 3802 | Westritschnig et al., | 2014 | Human vaccines and immunotherapeutics. 2014; 10(1):2846-2859 | non pertinent |
| 3803 | Westhoff et al.,      | 2014 | BMC Cancer. 2014; 14(1)                                      | non pertinent |
| 3804 | Wepner et al.,        | 2014 | Pain. 2014; 155(2):261-268                                   | non pertinent |
| 3805 | Weisstanner et al.,   | 2014 | Neuroradiology. 2014; 56:231-232                             | non pertinent |
| 3806 | Weiss et al.,         | 2014 | Drug Alcohol Depend. 2014; 140:118-122                       | non pertinent |
| 3807 | Weiss et al.,         | 2014 | Pediatr Blood Cancer. 2014; 61(6):982-986                    | non pertinent |
| 3808 | Weisler et al.,       | 2014 | Neuropsychiatric disease and treatment. 2014; 10:1-12        | non pertinent |
| 3809 | Weiser et al.,        | 2014 | Bipolar disorders. 2014; 16(4):441-447                       | non pertinent |
| 3810 | Weiland et al.,       | 2014 | Acta Radiol. 2014; 55(6):715-724                             | non pertinent |
| 3811 | Webster et al.,       | 2014 | J of drugs in dermatology. 2014; 13(6):665-670               | non pertinent |
| 3812 | Watz et al.,          | 2014 | The lancet. Respiratory medicine. 2014; 2(1):63-72           | non pertinent |
| 3813 | Watson et al.,        | 2014 | Molecular therapy. 2014; 22:292                              | non pertinent |
| 3814 | Wang et al.,          | 2014 | American j of cardiovascular drug. 2014; 14(2):147-154       | non pertinent |
| 3815 | Wang et al.,          | 2014 | J of anesthesia. 2014; 28(5):790-793                         | non pertinent |
| 3816 | Wall et al.,          | 2014 | JAMA neurology. 2014; 71(6):693-701                          | non pertinent |
| 3817 | Vollmer et al.,       | 2014 | J of neurology. 2014; 261(4):773-783                         | non pertinent |
| 3818 | Vollmer et al.,       | 2014 | Pain practice. 2014; 14(8):732-744                           | non pertinent |
| 3819 | Volkman et al.,       | 2014 | The lancet. Neurology. 2014; 13(9):875-884                   | non pertinent |
| 3820 | Voit et al.,          | 2014 | The lancet. Neurology. 2014; 13(10):987-996                  | non pertinent |

|      |                         |      |                                                                         |               |
|------|-------------------------|------|-------------------------------------------------------------------------|---------------|
| 3821 | Vlaev et al.,           | 2014 | Health Psychol. 2014; 33(1):66-76                                       | non pertinent |
| 3822 | Viscusi et al.,         | 2014 | Clinical J of Pain. 2014; 30(2):102-110                                 | non pertinent |
| 3823 | Vinik et al.,           | 2014 | Diabetes care. 2014; 37(8):2302-2309                                    | non pertinent |
| 3824 | Vestergaard et al.,     | 2014 | Annals of thoracic surgery. 2014; 97(1):153-160                         | non pertinent |
| 3825 | Verdijk et al.,         | 2014 | Vaccine. 2014; 32(39):4938-4944                                         | non pertinent |
| 3826 | Van Tilburg et al.,     | 2014 | Complementary therapies in medicine. 2014; 22(1):17-20                  | non pertinent |
| 3827 | Van Rhee et al.,        | 2014 | The lancet. Oncology. 2014; 15(9):966-974                               | non pertinent |
| 3828 | Van Geest et al.,       | 2014 | BMC musculoskeletal disorders. 2014; 15:129                             | non pertinent |
| 3829 | Van der Velden et al.,  | 2014 | J of infectious diseases. 2014; 209(1):12-23                            | non pertinent |
| 3830 | Van Der Straten et al., | 2014 | PLoS One. 2014; 9(2)                                                    | non pertinent |
| 3831 | Van den Heuvel et al.,  | 2014 | Radiotherapy and oncology. 2014; 110(1):126-131                         | non pertinent |
| 3832 | Van Den Berg et al.,    | 2014 | PLoS One. 2014; 9(10)                                                   | non pertinent |
| 3833 | Van de Glind et al.,    | 2014 | Trials. 2014; 15(1)                                                     | non pertinent |
| 3834 | Van Cutsem et al.,      | 2014 | Clinical cancer research. 2014; 20(16):4240-4250                        | non pertinent |
| 3835 | Valentino et al.,       | 2014 | Haemophilia. 2014; 20(3):398-406                                        | non pertinent |
| 3836 | Valayannopoulos et al., | 2014 | J of hepatology. 2014; 61(5):1135-1142                                  | non pertinent |
| 3837 | Umbricht et al.,        | 2014 | Neuropsychopharmacology. 2014; 39(7):1568-1577                          | non pertinent |
| 3838 | Ucmak et al.,           | 2014 | Cutaneous and ocular toxicology. 2014; 33(1):54-59                      | non pertinent |
| 3839 | Turner et al.,          | 2014 | Headache. 2014; 54(2):269-277                                           | non pertinent |
| 3840 | Turner et al.,          | 2014 | American j of obstetrics and gynecology. 2014; 211(5):479.e471-479.e413 | non pertinent |
| 3841 | Turncliff et al.,       | 2014 | Schizophrenia research. 2014; 159(2-3):404-410                          | non pertinent |

|      |                       |      |                                                                           |               |
|------|-----------------------|------|---------------------------------------------------------------------------|---------------|
| 3842 | Tsukada et al.,       | 2014 | J of bone and joint surgery. American volume. 2014; 96(17):1433-1438      | non pertinent |
| 3843 | Tse et al.,           | 2014 | European neuropsychopharmacology. 2014; 24(10):1641-1649                  | non pertinent |
| 3844 | Tristram et al.,      | 2014 | The lancet. Oncology. 2014; 15(12):1361-1368                              | non pertinent |
| 3845 | Toth et al.,          | 2014 | Clin J Pain. 2014; 30(2):111-118                                          | non pertinent |
| 3846 | Topazio et al.,       | 2014 | BMC urology. 2014; 14(1)                                                  | non pertinent |
| 3847 | Toosizadeh et al.,    | 2014 | Gerontology. 2014; 61(1):3-14                                             | non pertinent |
| 3848 | Tombal et al.,        | 2014 | Lancet oncology. 2014; 15(6):592-600                                      | non pertinent |
| 3849 | Toledo Junior et al., | 2014 | Revista da sociedade brasileira de medicina tropical. 2014; 47(6):756-762 | non pertinent |
| 3850 | Tinoco et al.,        | 2014 | Vaccine. 2014; 32(13):1480-1487                                           | non pertinent |
| 3851 | Thollot et al.,       | 2014 | Pediatric infectious disease j. 2014; 33(12):1246-1254                    | non pertinent |
| 3852 | Thienthong et al.,    | 2014 | Anaesthesia, pain and intensive care. 2014; 18(1):38-42                   | non pertinent |
| 3853 | Theysohn et al.,      | 2014 | Neurogastroenterol Motil. 2014; 26(12):1743-1753                          | non pertinent |
| 3854 | Theysohn et al.,      | 2014 | J Altern Complement Med. 2014; 20(12):893-900                             | non pertinent |
| 3855 | Thankamony et al.,    | 2014 | J of clinical endocrinology and metabolism. 2015; 99(2):639-647           | non pertinent |
| 3856 | Tevaarwerk et al.,    | 2014 | J of clinical oncology. 2014; 32(35):3948-3958                            | non pertinent |
| 3857 | Terras et al.,        | 2014 | JAMA dermatology. 2014; 150(6):621-627                                    | non pertinent |
| 3858 | Terkelsen et al.,     | 2014 | Anesthesiology. 2014; 120(5):1225-1236                                    | non pertinent |
| 3859 | Telch et al.,         | 2014 | Am J Psychiatry. 2014; 171(10):1091-1098                                  | non pertinent |

|      |                         |      |                                                                         |               |
|------|-------------------------|------|-------------------------------------------------------------------------|---------------|
| 3860 | Tedesco Triccas et al., | 2014 | Cerebrovascular diseases (basel, switzerland). 2014; 37:59-             | non pertinent |
| 3861 | Tassorelli et al.,      | 2014 | Parkinsonism & related disorders. 2014; 20(11):1140-1144                | non pertinent |
| 3862 | Tanaka et al.,          | 2014 | J Clin Monit Comput. 2014; 28(6):561-566                                | non pertinent |
| 3863 | Tan et al.,             | 2014 | American j of ophthalmology. 2014; 157(1):237-247.e231                  | non pertinent |
| 3864 | Tamburella et al.,      | 2014 | Frontiers in human neuroscience. 2014; 8(MAY)                           | non pertinent |
| 3865 | Taieb et al.,           | 2014 | The lancet. Oncology. 2014;15(8):862-873                                | non pertinent |
| 3866 | Syngle et al.,          | 2014 | Neurological sciences. 2014; 35(7):1067-1073                            | non pertinent |
| 3867 | Swenson et al.,         | 2014 | European j of radiology. 2014; 83(4):733-738                            | non pertinent |
| 3868 | Swart et al.,           | 2014 | BMC Musculoskelet Disord. 2014; 15:63                                   | non pertinent |
| 3869 | Suzuki et al.,          | 2014 | Neurogastroenterology and motility. 2014; 26(7):950-961                 | non pertinent |
| 3870 | Sulkowski et al.,       | 2014 | New England j of medicine. 2014; 370(3):211-221                         | non pertinent |
| 3871 | Suffoletto et al.,      | 2014 | Annals of emergency medicine. 2014; 64(6):664-672                       | non pertinent |
| 3872 | Strigo et al.,          | 2014 | Translational psychiatry. 2014; 4                                       | non pertinent |
| 3873 | Streicher et al.,       | 2014 | J Bodyw Mov Ther. 2014; 18(3):489-496                                   | non pertinent |
| 3874 | Strebkova et al.,       | 2014 | Annals of the rheumatic diseases. 2014; 73                              | non pertinent |
| 3875 | Straube et al.,         | 2014 | Transl Psychiatry. 2014; 4:e490                                         | non pertinent |
| 3876 | Straube et al.,         | 2014 | Psychother Psychosom. 2014; 83(4):222-233                               | non pertinent |
| 3877 | Stovner et al.,         | 2014 | Cephalalgia. 2014; 34(7):523-532                                        | non pertinent |
| 3878 | Stevenson et al.,       | 2014 | Nutrition (Burbank, Los Angeles County, Calif.). 2014; 30(10):1151-1157 | non pertinent |

|      |                    |      |                                                                      |               |
|------|--------------------|------|----------------------------------------------------------------------|---------------|
| 3879 | Sternlicht et al., | 2014 | Local and regional anesthesia. 2014; 7:69-74                         | non pertinent |
| 3880 | Staud et al.,      | 2014 | European j of pain (London, England). 2014; 18(6):803-812            | non pertinent |
| 3881 | Stasi et al.,      | 2014 | Lung cancer: targets and therapy. 2014; 5:43-50                      | non pertinent |
| 3882 | Srinivasan et al., | 2014 | American j of geriatric psychiatry. 2014; 22(3):135-136              | non pertinent |
| 3883 | Spreen et al.,     | 2014 | J of acquired immune deficiency syndrome (1999). 2014; 67(5):481-486 | non pertinent |
| 3884 | Spierings et al.,  | 2014 | Pain medicine (united states). 2014; 15(2):264-271                   | non pertinent |
| 3885 | Spick et al.,      | 2014 | Eur J Radiol. 2014; 83(6):980-983                                    | non pertinent |
| 3886 | Speierer et al.,   | 2014 | Swiss medical weekly. 2014; 144:13-                                  | non pertinent |
| 3887 | Soravia et al.,    | 2014 | Depression and anxiety. 2014; 31(5):429-435                          | non pertinent |
| 3888 | Sood et al.,       | 2014 | European urology, supplements. 2014; 13(1):e1020-e1020b              | non pertinent |
| 3889 | Song et al.,       | 2014 | Human vaccines & immunotherapeutics. 2014; 10(10):2958-2964          | non pertinent |
| 3890 | Son et al.,        | 2014 | Stereotact Funct Neurosurg. 2014; 92(4):218-226                      | non pertinent |
| 3891 | Smith et al.,      | 2014 | Obesity (silver spring, md.). 2014; 22(10):2137-2146                 | non pertinent |
| 3892 | Smith et al.,      | 2014 | J of clinical oncology. 2014; 21(30):3391-3399                       | non pertinent |
| 3893 | Slatkovska et al., | 2014 | Calcified tissue international. 2014; 95(6):547-556                  | non pertinent |
| 3894 | Sisson et al.,     | 2014 | Alimentary pharmacology & therapeutics. 2014; 40(1):51-62            | non pertinent |

|      |                  |      |                                                                     |               |
|------|------------------|------|---------------------------------------------------------------------|---------------|
| 3895 | Singla et al.,   | 2014 | Current medical research and opinion. 2014; 30(3):349-359           | non pertinent |
| 3896 | Simpson et al.,  | 2014 | Pain. 2014; 155(10):1943-1954                                       | non pertinent |
| 3897 | Simon et al.,    | 2014 | Menopause. 2014; 21(6):633-640                                      | non pertinent |
| 3898 | Siddiqui et al., | 2014 | Pain practice. 2014; 14(2):132-139                                  | non pertinent |
| 3899 | Shpaner et al.,  | 2014 | Neuroimage Clin. 2014; 5:365-376                                    | non pertinent |
| 3900 | Short et al.,    | 2014 | Anesth Analg. 2014; 118(5):981-986                                  | non pertinent |
| 3901 | Shin et al.,     | 2014 | Pediatric critical care medicine. 2014; 15(5):451-455               | non pertinent |
| 3902 | Sheta et al.,    | 2014 | Paediatric anaesthesia. 2014; 24(2):181-189                         | non pertinent |
| 3903 | Shervin et al.,  | 2014 | American j of emergency medicine. 2014; 32(9):1011-1015             | non pertinent |
| 3904 | Sheppard et al., | 2014 | Investigative ophthalmology & visual science. 2014; 55(5):2993-3002 | non pertinent |
| 3905 | Shenhav et al.,  | 2014 | Emotion (Washington, D.C.). 2014; 14(2):301-309                     | non pertinent |
| 3906 | Shen et al.,     | 2014 | J of clinical neuroscience. 2014; 21(9):1612-1616                   | non pertinent |
| 3907 | Shen et al.,     | 2014 | Neurorehabilitation and neural repair. 2014; 28(6):524-535          | non pertinent |
| 3908 | Shen et al.,     | 2014 | Clinical respiratory j. 2014; 8(1):100-107                          | non pertinent |
| 3909 | Shavakhi et al., | 2014 | Endoscopy. 2014; 46(8):633-639                                      | non pertinent |
| 3910 | Sharma et al.,   | 2014 | J of oral and maxillofacial surgery. 2014; 14(3):611-615            | non pertinent |
| 3911 | Sharma et al.,   | 2014 | Cardiovascular and interventional radiology. 2014; 37(2):142-143    | non pertinent |
| 3912 | Sharara et al.,  | 2014 | United european gastroenterology j. 2014; 2(3):179-188              | non pertinent |
| 3913 | Shapiro          | 2014 | World neurosurg. 2014; 81(5-6):830-835                              | non pertinent |

|      |                         |      |                                                                                                  |               |
|------|-------------------------|------|--------------------------------------------------------------------------------------------------|---------------|
| 3914 | Shamji et al.,          | 2014 | J of spinal disorders & techniques. 2014; 27(7):370-375                                          | non pertinent |
| 3915 | Shakoor et al.,         | 2014 | BMJ Open. 2014; 4(12):e005360                                                                    | non pertinent |
| 3916 | Shah et al.,            | 2014 | Blood. 2014; 123(15):2317-2324                                                                   | non pertinent |
| 3917 | Serour et al.,          | 2014 | Reproductive biology and endocrinology. 2014; 12(1)                                              | non pertinent |
| 3918 | Seo et al.,             | 2014 | Clinical and vaccine immunology. 2014; 21(7):989-996                                             | non pertinent |
| 3919 | Selvaraj et al.,        | 2014 | Neuropsychopharmacology. 2014; 39:223-224                                                        | non pertinent |
| 3920 | Seino et al.,           | 2014 | Diabetes, obesity & metabolism. 2014; 16(8):739-747                                              | non pertinent |
| 3921 | Scott et al.,           | 2014 | Health technology assessment. 2014; 18(66):i-xxiv+1-164                                          | non pertinent |
| 3922 | Schwartz et al.,        | 2014 | Clinical drug investigation. 2014; 35(2):95-108                                                  | non pertinent |
| 3923 | Schuh-Hofer et al.,     | 2014 | Somnologie. 2014; 18(1 SUPPL 1):74-75                                                            | non pertinent |
| 3924 | Schmidt-Wilcke et al.,  | 2014 | Neuroimage Clin. 2014; 6:252-261                                                                 | non pertinent |
| 3925 | Schmidt-Erfurth et al., | 2014 | Ophthalmology. 2014; 121(1):193-201                                                              | non pertinent |
| 3926 | Schmidt et al.,         | 2014 | Biol Psychiatry. 2014; 76(4):289-296                                                             | non pertinent |
| 3927 | Schistad et al.,        | 2014 | Clinical j of pain. 2014; 30(10):869-874                                                         | non pertinent |
| 3928 | Schadendorf et al.,     | 2014 | Annals of oncology: official j of the european society for medical oncology. 2014; 25(3):700-706 | non pertinent |
| 3930 | Satoh et al.,           | 2014 | J of clinical oncology. 2014; 32(19):2039-2049                                                   | non pertinent |
| 3931 | Satoh et al.,           | 2014 | Oncologist. 2014; 19(7):712-719                                                                  | non pertinent |
| 3932 | Sarchielli et al.,      | 2014 | European neuropsychopharmacology. 2014; 24(8):1289-1297                                          | non pertinent |



|      |                     |      |                                                                                                                                                                                          |               |
|------|---------------------|------|------------------------------------------------------------------------------------------------------------------------------------------------------------------------------------------|---------------|
| 3933 | Sandvik et al.,     | 2014 | European j of pain (united kingdom). 2014; 18(10):1490-1500                                                                                                                              | non pertinent |
| 3934 | San-Miguel et al.,  | 2014 | The lancet. Oncology. 2014; 15(11):1195-1206                                                                                                                                             | non pertinent |
| 3935 | Samarbakhsh et al., | 2014 | Global spine j. 2014; 4                                                                                                                                                                  | non pertinent |
| 3936 | Sallinen et al.,    | 2014 | BMC surgery. 2014; 14:77                                                                                                                                                                 | non pertinent |
| 3937 | Sakrajai et al.,    | 2014 | Clinical J of Pain. 2014; 30(12):1076-1083                                                                                                                                               | non pertinent |
| 3938 | Sahinovic et al.,   | 2014 | Anesth Analg. 2014; 119(2):288-301                                                                                                                                                       | non pertinent |
| 3939 | Saccomanno et al.,  | 2014 | Arthroscopy – j of arthroscopic and related surgery. 2014; 30(11):1491-1498                                                                                                              | non pertinent |
| 3940 | Saari et al.,       | 2014 | Hip international. 2014; 24(1):49-55                                                                                                                                                     | non pertinent |
| 3941 | Ryan et al.,        | 2014 | BMC Musculoskelet Disord. 2014; 15:59                                                                                                                                                    | non pertinent |
| 3942 | Ruz et al.,         | 2014 | Investigative ophthalmology and visual science. Conference: 2014 annual meeting of the association for research in vision and ophthalmology, AROV 2014. United states. 2014; 55(13):3673 | non pertinent |
| 3943 | Ruetzler et al.,    | 2014 | J of anesthesia. 2014; 28(4):580-586                                                                                                                                                     | non pertinent |
| 3944 | Rubel et al.,       | 2014 | British j of dermatology. 2014; 171(5):1164-1171                                                                                                                                         | non pertinent |
| 3945 | Rowley et al.,      | 2014 | Blood. 2014; 123(20):3101-3104                                                                                                                                                           | non pertinent |
| 3946 | Roue et al.,        | 2014 | Achrives of disease in childhood. 2014; 99:A163                                                                                                                                          | non pertinent |
| 3947 | Rothgange et al.,   | 2014 | Pain practice. 2014; 14:99-                                                                                                                                                              | non pertinent |
| 3948 | Roth et al.,        | 2014 | International j of cardiology. 2014; 176(1):55-61                                                                                                                                        | non pertinent |
| 3949 | Roth et al.,        | 2014 | American j of clinical nutrition. 2014; 100(6):1587-1595                                                                                                                                 | non pertinent |

|      |                          |      |                                                                  |               |
|------|--------------------------|------|------------------------------------------------------------------|---------------|
| 3950 | Rodriguez-Torres et al., | 2014 | Annals of hepatology. 2014; 13(4):364-375<br>BMC                 | non pertinent |
| 3951 | Roddy et al.,            | 2014 | musculoskeletal disorders. 2014; 15(1)                           | non pertinent |
| 3952 | Robinson et al.,         | 2014 | Jama. 2014; 311(18):1870-1882                                    | non pertinent |
| 3953 | Robbie et al.,           | 2014 | Infectious diseases and therapy. 2014; 3(2):203-214              | non pertinent |
| 3954 | Riquelme et al.,         | 2014 | BMC Neuroscience. 2014; 15:10                                    | non pertinent |
| 3955 | Rice et al.,             | 2014 | Lancet (london, england). 2014; 383(9929):1637-1647              | non pertinent |
| 3956 | Ribeiro et al.,          | 2014 | J Orthop Sports Phys Ther. 2014; 44(9):702-711                   | non pertinent |
| 3957 | Ribas et al.,            | 2014 | J of clinical pharmacology. 2014; 54(4):368-374                  | non pertinent |
| 3958 | Resik et al.,            | 2014 | Vaccine. 2014; 32(42):5399-5404                                  | non pertinent |
| 3959 | Rempe et al.,            | 2014 | PLoS One. 2014; 9(11):e112325                                    | non pertinent |
| 3960 | Reisinger et al.,        | 2014 | Human vaccines and immunotherapeutics. 2014; 10(8):2395-2407     | non pertinent |
| 3961 | Reif et al.,             | 2014 | Mol Psychiatry. 2014; 19(1):122-128                              | non pertinent |
| 3962 | Reed et al.,             | 2014 | Obstetrics and gynecology. 2014; 124(2 Pt 1):233-241             | non pertinent |
| 3963 | Reddy et al.,            | 2014 | Oral oncology. 2014; 50(5):498-505                               | non pertinent |
| 3964 | Reck et al.,             | 2014 | The lancet. Oncology. 2014; 15(2):143-155                        | non pertinent |
| 3965 | Read et al.,             | 2014 | Lancet (london, england). 2014; 384(9960):2123-2131              | non pertinent |
| 3966 | Ravn et al.,             | 2014 | Basic & clinical pharmacology & toxicology. 2014; 115(3):257-267 | non pertinent |
| 3967 | Raskin et al.,           | 2014 | Clinical J of Pain. 2014; 30(5):379-390                          | non pertinent |
| 3968 | Raskin et al.,           | 2014 | Gastroenterology. 2014; 147(4):793-802                           | non pertinent |

|      |                      |      |                                                                                        |               |
|------|----------------------|------|----------------------------------------------------------------------------------------|---------------|
| 3969 | Ramtvedt et al,      | 2014 | J of child and adolescent psychopharmacology. 2014; 24(3):130-139                      | non pertinent |
| 3970 | Ramo-Tello et al,    | 2014 | Multiple sclerosis (houndmills, basingstoke, england). 2014; 20(6):717-725             | non pertinent |
| 3971 | Raksakietisak et al, | 2014 | Chotmai het thangphaet (J of the Medical Association of Thailand). 2014; 97(5):530-535 | non pertinent |
| 3972 | Rajan et al,         | 2014 | Lancet oncology. 2014; 15(2):191-200                                                   | non pertinent |
| 3973 | Rahe-Meyer et al,    | 2014 | Anesthesiology. 2014; 121(5):969-977                                                   | non pertinent |
| 3974 | Raftopoulos et al,   | 2014 | Supportive care in cancer. 2014; 23(3):723-732                                         | non pertinent |
| 3975 | Radnovich et al,     | 2014 | J of pain research. 2014; 7:727-735                                                    | non pertinent |
| 3976 | Raby et al,          | 2014 | The american j on addictions. 2014; 23(1):68-75                                        | non pertinent |
| 3977 | Rabinak et al,       | 2014 | Neurobiol Learn Mem. 2014; 113:125-134                                                 | non pertinent |
| 3978 | Querellou et al,     | 2014 | Clin Nucl Med. 2014; 39(1):8-13                                                        | non pertinent |
| 3979 | Quaedflieg et al,    | 2014 | J Psychopharmacol. 2014; 28(1):39-48                                                   | non pertinent |
| 3980 | Qi et al,            | 2014 | Regional anesthesia and pain medicine. 2014; 39(3):208-213                             | non pertinent |
| 3981 | Pozzi et al,         | 2014 | Eur J Oral Implantol. 2014; 7(3):229-242                                               | non pertinent |
| 3982 | Powell et al,        | 2014 | J Magn Reson Imaging. 2014; 39(2):419-426                                              | non pertinent |
| 3983 | Pourmoghaddas et al, | 2014 | Biomed research international. 2014;191026                                             | non pertinent |
| 3984 | Post et al,          | 2014 | Neuropsychopharmacology. 2014; 39:346-647                                              | non pertinent |
| 3985 | Porsteinsson et al,  | 2014 | JAMA-journal of the american medical association. 2014; 311(7):682-691                 | non pertinent |
| 3986 | Popova et al,        | 2014 | Neuroimage Clin. 2014; 6:156-165                                                       | non pertinent |

|      |                    |      |                                                                   |               |
|------|--------------------|------|-------------------------------------------------------------------|---------------|
| 3987 | Poonai et al.,     | 2014 | CMAJ: Canadian Medical Association j. 2014; 186(18):1358-1363     | non pertinent |
| 3988 | Poder et al.,      | 2014 | Vaccine. 2014; 32(9):1121-1129                                    | non pertinent |
| 3989 | Pistilli et al.,   | 2014 | Eur J Oral Implantol. 2014; 7(2):153-171                          | non pertinent |
| 3990 | Pinkerton et al.,  | 2014 | J of clinical endocrinology and metabolism. 2014; 99(2):E189-E198 | non pertinent |
| 3991 | Pinkerton et al.,  | 2014 | J of women's health (2002). 2014; 23(1):18-28                     | non pertinent |
| 3992 | Pimentel et al.,   | 2014 | Digestive diseases and sciences. 2014; 59(6):1278-1285            | non pertinent |
| 3993 | Pignata et al.,    | 2014 | The lancet. Oncology. 2014; 15(4):396-405                         | non pertinent |
| 3994 | Phan               | 2014 | Biological psychiatry. 2014; 75(9 SUPPL 1):27                     | non pertinent |
| 3995 | Pfleiderer et al., | 2014 | J of neural transmission. 2014; 121(11):1417-1428                 | non pertinent |
| 3996 | Petersen et al.,   | 2014 | Pain. 2014; 155(5):929-936                                        | non pertinent |
| 3997 | Peng et al.,       | 2014 | PLoS One. 2014; 9(3):e91052                                       | non pertinent |
| 3998 | Pellegrino et al., | 2014 | J of spinal disorders & techniques. 2014; 27(8):409-414           | non pertinent |
| 3999 | Pekyavas et al.,   | 2014 | Fizyoterapi rehabilitasyon. 2014; 25(1 SUPPL 1):31                | non pertinent |
| 4000 | Pedersen et al.,   | 2014 | Pain. 2014; 155(5):881-888                                        | non pertinent |
| 4001 | Pecina et al.,     | 2014 | J of neuroscience. 2014; 34(17):5874-5881                         | non pertinent |
| 4002 | Pecina et al.,     | 2014 | Mol Psychiatry. 2014; 19(3):385-391                               | non pertinent |
| 4003 | Paulsen et al.,    | 2014 | J of clinical oncology. 2014; 32(29):3221-3228                    | non pertinent |
| 4004 | Pattee et al.,     | 2014 | Current medical research and opinion. 2014; 30(11):2255-2265      | non pertinent |
| 4005 | Patel et al.,      | 2014 | Diabetes technology & therapeutics. 2014; 16(1):15-19             | non pertinent |

|      |                          |      |                                                                         |               |
|------|--------------------------|------|-------------------------------------------------------------------------|---------------|
| 4006 | Papaconstantinou et al., | 2014 | Cutaneous and ocular toxicology. 2014; 33(3):173-180                    | non pertinent |
| 4007 | Paech et al.,            | 2014 | Anaesthesia and intensive care. 2014; 42(1):15-22                       | non pertinent |
| 4008 | Padhi et al.,            | 2014 | J of clinical pharmacology. 2014; 54(2):168-178                         | non pertinent |
| 4009 | Oxlund et al.,           | 2014 | J of the american society of hypertension : JASH. 2014; 8(12):872-881   | non pertinent |
| 4010 | Owonikoko et al.,        | 2014 | Cancer chemotherapy and pharmacology. 2014; 73(1):171-180               | non pertinent |
| 4011 | Ory-Magne et al.,        | 2014 | Neurology. 2014; 82(4):300-307                                          | non pertinent |
| 4012 | Olsen et al.,            | 2014 | Osteoporos Int. 2014; 25(8):2017-2025                                   | non pertinent |
| 4013 | Olivares et al.,         | 2014 | British j of nutrition. 2014; 112(1):30-40                              | non pertinent |
| 4014 | Olischar et al.,         | 2014 | Paediatr Anaesth. 2014; 24(11):1149-1157                                | non pertinent |
| 4015 | Olanow et al.,           | 2014 | The lancet. Neurology. 2014; 13(2):141-149                              | non pertinent |
| 4016 | Okihara et al.,          | 2014 | International j of urology. 2014; 21(3):271-276                         | non pertinent |
| 4017 | Oh et al.,               | 2014 | J of gastroenterology and hepatology (australia). 2014; 29(6):1171-1176 | non pertinent |
| 4018 | Ogotu et al.,            | 2014 | Malaria j. 2014; 13(1)                                                  | non pertinent |
| 4019 | Ogino et al.,            | 2014 | Anesth Analg. 2014; 118(6):1317-1325                                    | non pertinent |
| 4020 | Oertel et al.,           | 2014 | Clin Pharmacol Ther. 2014; 96(6):684-693                                | non pertinent |
| 4021 | O'Riordan et al.,        | 2014 | J of aerosol medicine and pulmonary drug delivery. 2014; 27(3):200-208  | non pertinent |
| 4022 | Novotna et al.,          | 2014 | Clinical therapeutics. 2014; 36(3):357-367                              | non pertinent |
| 4023 | Noveck et al.,           | 2014 | J of the american heart association. 2014; 3(4)                         | non pertinent |

|      |                             |      |                                                               |               |
|------|-----------------------------|------|---------------------------------------------------------------|---------------|
| 4024 | Norman et al.,              | 2014 | Vaccine. 2014; 32(16):1856-1862                               | non pertinent |
| 4025 | Nolte et al.,               | 2014 | Annals of allergy, asthma and immunology. 2014; 113(1):93-100 | non pertinent |
| 4026 | Nistal-Nuno et al.,         | 2014 | F1000research. 2014; 3                                        | non pertinent |
| 4027 | Niesters et al.,            | 2014 | Brain Connect. 2014; 4(6):404-416                             | non pertinent |
| 4028 | Nielsen et al.,             | 2014 | Physical therapy. 2014; 94(2):197-209                         | non pertinent |
| 4029 | Newby et al.,               | 2014 | Lancet (london, england). 2014; 384(9949):1187-1195           | non pertinent |
| 4030 | Nelson et al.,              | 2014 | J Vasc Surg. 2014; 59(5):1181-1193                            | non pertinent |
| 4031 | Nct – Vendittoli            | 2014 | National Library of Medicine. 2014                            | non pertinent |
| 4032 | Nct – Moss et al.,          | 2014 | JACC Cardiovasc Imaging. 2019 Aug; pii:1936-878X(19)30557-1   | non pertinent |
| 4033 | Nct – Lindberg-Larsen       | 2014 | National Library of Medicine. 2014                            | non pertinent |
| 4034 | Nct – Andersen              | 2014 | National Library of Medicine. 2014                            | non pertinent |
| 4035 | Nct – Imhof et al.,         | 2014 | Int Sch Res Notices. 2015 Feb; 2015:785497                    | non pertinent |
| 4036 | Nct – Breebaart             | 2014 | National Library of Medicine. 2014                            | non pertinent |
| 4037 | Nct – Rodríguez             | 2014 | National Library of Medicine. 2014                            | non pertinent |
| 4038 | Nct – Black                 | 2014 | National Library of Medicine. 2014                            | non pertinent |
| 4039 | Nct – University of Alberta | 2014 | National Library of Medicine. 2014                            | non pertinent |
| 4040 | Nct – Irwin                 | 2014 | National Library of Medicine. 2014                            | non pertinent |
| 4041 | Nct – Drew                  | 2014 | National Library of Medicine. 2014                            | non pertinent |
| 4042 | Nct – Nair                  | 2014 | National Library of Medicine. 2014                            | non pertinent |
| 4043 | Nct – Mendonca              | 2014 | National Library of Medicine. 2014                            | non pertinent |
| 4044 | Nct – Rabinak               | 2014 | National Library of Medicine. 2014                            | non pertinent |
| 4045 | Nct – Ramasubbu             | 2014 | National Library of Medicine. 2014                            | non pertinent |
| 4046 | Nct – Fisher et al.         | 2014 | Diabetes Care. 2018 Sep; 41(9):1862-1869                      | non pertinent |
| 4047 | Nct – Turhanoglu            | 2014 | National Library of Medicine. 2014                            | non pertinent |
| 4048 | Nct – Huang                 | 2014 | National Library of Medicine. 2014                            | non pertinent |
| 4049 | Nct – Waxman                | 2014 | National Library of Medicine. 2014                            | non pertinent |
| 4050 | Nct – Choi                  | 2014 | National Library of Medicine. 2014                            | non pertinent |

|      |                          |      |                                               |               |
|------|--------------------------|------|-----------------------------------------------|---------------|
| 4051 | Nct – Meldrum            | 2014 | National Library of Medicine. 2014            | non pertinent |
| 4052 | Nct – Del Coso           | 2014 | National Library of Medicine. 2014            | non pertinent |
| 4053 | Nct – Feitosa et al.,    | 2014 | Rev Assoc Med Bras. 2019 Mar; 65(3):316-318   | non pertinent |
| 4054 | Nct – Sly                | 2014 | National Library of Medicine. 2014            | non pertinent |
| 4055 | Nct – Sung               | 2014 | National Library of Medicine. 2014            | non pertinent |
| 4056 | Nct – Stevens-Lapsley    | 2014 | National Library of Medicine. 2014            | non pertinent |
| 4057 | Nct – Buccino            | 2014 | National Library of Medicine. 2014            | non pertinent |
| 4058 | Nct – Braten et al.,     | 2014 | BMJ. 2019 Oct; 367:l5654                      | non pertinent |
| 4059 | Nct – Mendonca et al.,   | 2014 | Eur J Anaesthesiol. 2020 Mar; 37(3):224-234   | non pertinent |
| 4060 | Nct – Khemiri et al.,    | 2014 | Alcohol Clin Exp Res. 2019 Jan; 43(1):135-146 | non pertinent |
| 4061 | Nct – Elbogen            | 2014 | National Library of Medicine. 2014            | non pertinent |
| 4062 | Nct – Aframian           | 2014 | National Library of Medicine. 2014            | non pertinent |
| 4063 | Nct – Asarnow            | 2014 | National Library of Medicine. 2014            | non pertinent |
| 4064 | Nct – Pigeon             | 2014 | National Library of Medicine. 2014            | non pertinent |
| 4065 | Nct – Apkarian           | 2014 | National Library of Medicine. 2014            | non pertinent |
| 4066 | Nct – Poulin             | 2014 | National Library of Medicine. 2014            | non pertinent |
| 4067 | Nct – Reckziegel et al., | 2014 | BMJ Open. 2017 Jun; 7(6):e014013              | non pertinent |
| 4068 | Nct – Pfizer             | 2014 | National Library of Medicine. 2014            | non pertinent |
| 4069 | Nct – Allen              | 2014 | National Library of Medicine. 2014            | non pertinent |
| 4070 | Nct – Weiner             | 2014 | National Library of Medicine. 2014            | non pertinent |
| 4071 | Nct – Keith              | 2014 | National Library of Medicine. 2014            | non pertinent |
| 4072 | Nct – Chang              | 2014 | National Library of Medicine. 2014            | non pertinent |
| 4073 | Nct – Graco et al.,      | 2014 | Thorax. 2018 Sep; 73(9):864-871               | non pertinent |
| 4074 | Nct – Lepage             | 2014 | National Library of Medicine. 2014            | non pertinent |
| 4075 | Nct – Mahajan            | 2014 | National Library of Medicine. 2014            | non pertinent |
| 4076 | Nct – Adamson            | 2014 | National Library of Medicine. 2014            | non pertinent |
| 4077 | Nct – Vereecke           | 2014 | National Library of Medicine. 2014            | non pertinent |
| 4078 | Nct – Sharon             | 2014 | National Library of Medicine. 2014            | non pertinent |
| 4079 | Navarro Coy et al.,      | 2014 | BMC musculoskeletal disorders. 2014; 15:452   | non pertinent |

|      |                    |      |                                                                                |               |
|------|--------------------|------|--------------------------------------------------------------------------------|---------------|
| 4080 | Nasser et al.,     | 2014 | Arthritis care & research. 2014; 66(2):293-300                                 | non pertinent |
| 4081 | Narouze et al.,    | 2014 | Regional anesthesia and pain medicine. 2014; 39(5 SUPPL 1):e112-e116           | non pertinent |
| 4082 | Naoumova et al.,   | 2014 | Swedish dental j. Supplement. 2014; 234:7-118                                  | non pertinent |
| 4083 | Nankabirwa et al., | 2014 | Clinical infectious diseases. 2014; 58(10):1404-1412                           | non pertinent |
| 4084 | Nam et al.,        | 2014 | Clinical rheumatology. 2014; 33(12):1807-1814                                  | non pertinent |
| 4085 | Nam et al.,        | 2014 | Annals of rheumatic diseases. 2014; 73(1):75-85                                | non pertinent |
| 4086 | Nakae et al.,      | 2014 | European j of anaesthesiology. 2014; 31:122                                    | non pertinent |
| 4087 | Nagata et al.,     | 2014 | Eur J Radiol. 2014; 83(12):2172-2176                                           | non pertinent |
| 4088 | Nagahara et al.,   | 2014 | Scandinavian j of gastroenterology. 2014; 49(4):409-417                        | non pertinent |
| 4089 | Naderer et al.,    | 2014 | Antimicrobial agents and chemotherapy. 2014; 58(1):419-423                     | non pertinent |
| 4090 | Murdoch et al.,    | 2014 | International j of clinical pharmacology and therapeutics. 2014; 52(4):267-276 | non pertinent |
| 4091 | Mungee et al.,     | 2014 | Neuroreport. 2014; 25(7):480-484                                               | non pertinent |
| 4092 | Mundt et al.,      | 2014 | Sleep. 2014; 37:A266                                                           | non pertinent |
| 4093 | Mugie et al.,      | 2014 | Gastroenterology. 2014; 147(6):1285-1295.e1281                                 | non pertinent |
| 4094 | Mudaliar et al.,   | 2014 | Diabetes technology & therapeutics. 2014; 16(3):137-144                        | non pertinent |
| 4095 | Motzer et al.,     | 2014 | The lancet. Oncology. 2014; 15(3):286-296                                      | non pertinent |
| 4096 | Motomura et al.,   | 2014 | BMC neuroscience. 2014; 15(1)                                                  | non pertinent |
| 4097 | Moss et al.,       | 2014 | Paediatric anaesthesia. 2014; 24(5):483-489                                    | non pertinent |



|      |                           |      |                                                                                   |               |
|------|---------------------------|------|-----------------------------------------------------------------------------------|---------------|
| 4098 | Moser et al.,             | 2014 | AJNR. American j of neuroradiology. 2014; 35(8):1467-1474                         | non pertinent |
| 4099 | Moosmayer et al.,         | 2014 | J Bone Joint Surg Am. 2014; 96(18):1504-1514                                      | non pertinent |
| 4100 | Montaser-Kouhsari et al., | 2014 | J of dermatological treatment. 2014; 25(4):337-341                                | non pertinent |
| 4101 | Monk et al.,              | 2014 | The lancet. Oncology. 2014; 15(8):799-808                                         | non pertinent |
| 4102 | Monga et al.,             | 2014 | International Journal of Clinical and Experimental Hypnosis. 2014; 62(2): 164-178 | non pertinent |
| 4103 | Moen et al.,              | 2014 | British j of sports medicine. 2014; 48(18):1358-1363                              | non pertinent |
| 4104 | Mischoulon et al.,        | 2014 | J of clinical psychiatry. 2014; 75(4):370-376                                     | non pertinent |
| 4105 | Miokovic et al.,          | 2014 | Med Sci Sports Exerc. 2014; 46(8):1506-1516                                       | non pertinent |
| 4106 | Miller et al.,            | 2014 | Clinical j of Pain. 2014; 30(12):1015-1022                                        | non pertinent |
| 4107 | Miller et al.,            | 2014 | Physiol Behav. 2014; 124:8-14                                                     | non pertinent |
| 4108 | Miki et al.,              | 2014 | Psycho-oncology. 2014; 23(8):906-913                                              | non pertinent |
| 4109 | Miehlke et al.,           | 2014 | Gastroenterology. 2014; 146(5):1222-1230.e1222                                    | non pertinent |
| 4110 | Middleton et al.,         | 2014 | The lancet. Oncology. 2014; 15(8):829-840                                         | non pertinent |
| 4111 | Mickelson et al.,         | 2014 | J of hand surgery. 2014; 39(10):1933-1941                                         | non pertinent |
| 4112 | Michalak et al.,          | 2014 | Current medical research and opinion. 2014; 30(4):711-718                         | non pertinent |
| 4113 | Mesa et al.,              | 2014 | Haematologica. 2014; 99(2):292-298                                                | non pertinent |
| 4114 | Merz et al.,              | 2014 | Soc Cogn Affect Neurosci. 2014; 9(9):1426-1434                                    | non pertinent |
| 4115 | Menzies et al.,           | 2014 | J of behavioral medicine. 2014; 37(1):70-80                                       | non pertinent |
| 4116 | Menz et al.,              | 2014 | BMC musculoskeletal disorders. 2014; 15:86                                        | non pertinent |
| 4117 | Meissner et al.,          | 2014 | Anesthesiology. 2014; 121(6):1281-1291                                            | non pertinent |

|      |                     |      |                                                             |               |
|------|---------------------|------|-------------------------------------------------------------|---------------|
| 4118 | Meier et al.,       | 2014 | Osteoporosis international. 2014; 25(1):359-366             | non pertinent |
| 4119 | McQuaid et al.,     | 2014 | J of pain. 2014; 15(4 SUPPL 1):108                          | non pertinent |
| 4120 | McNicholl et al.,   | 2014 | Gut. 2014; 63(2):244-249                                    | non pertinent |
| 4121 | McManus et al.,     | 2014 | Pediatric blood & cancer. 2014; 61(5):815-820               | non pertinent |
| 4122 | McLeod et al.,      | 2014 | British j of anaesthesia. 2014; 113(5):875-883              | non pertinent |
| 4123 | McKeever et al.,    | 2014 | Paediatr Anaesth. 2014; 24(7):766-773                       | non pertinent |
| 4124 | McKavanagh et al.,  | 2014 | Irish j of medical science. 2014; 183(8):420-421            | non pertinent |
| 4125 | McIntyre et al.,    | 2014 | Arthritis and rheumatology. 2014; 66(2):451-460             | non pertinent |
| 4126 | McGrouther et al.,  | 2014 | Current medical research and opinion. 2014; 30(4):733-739   | non pertinent |
| 4127 | McGlinchey et al.,  | 2014 | Brain injury. 2014; 28(5-6):624-625                         | non pertinent |
| 4128 | McDonald et al.,    | 2014 | BMC Cancer. 2014; 14:264                                    | non pertinent |
| 4129 | McCrae et al.,      | 2014 | Sleep. 2014; 37:A176-A177                                   | non pertinent |
| 4130 | McClinton et al.,   | 2014 | Trials. 2014; 15:238                                        | non pertinent |
| 4131 | Mayer et al.,       | 2014 | Gut. 2014; 63(3):442-450                                    | non pertinent |
| 4132 | Mauger et al.,      | 2014 | Experimental physiology. 2014; 99(1):164-171                | non pertinent |
| 4133 | Mattia et al.,      | 2014 | Neuromodulation. 2014; 17(3):e29-e30                        | non pertinent |
| 4134 | Matro et al.,       | 2014 | Alimentary pharmacology & therapeutics. 2014; 40(6):610-619 | non pertinent |
| 4135 | Mataix-Cols et al., | 2014 | British j of psychiatry. 2014; 204(1):77-78                 | non pertinent |
| 4136 | Masala et al.,      | 2014 | Cardiovasc Intervent Radiol. 2014; 37(2):476-481            | non pertinent |
| 4137 | Martinsen et al.,   | 2014 | PLoS One. 2014; 9(9):e108637                                | non pertinent |
| 4138 | Martin et al.,      | 2014 | J of women's health. 2014; 23(5):389-396                    | non pertinent |

|      |                       |      |                                                                                |               |
|------|-----------------------|------|--------------------------------------------------------------------------------|---------------|
| 4139 | Martin et al.,        | 2014 | International j of clinical pharmacology and therapeutics. 2014; 53(4):301-316 | non pertinent |
| 4140 | Martin et al.,        | 2014 | Anesthesiology. 2014; 121(4):740-752                                           | non pertinent |
| 4141 | Marques et al.,       | 2014 | Frontiers in human neuroscience. 2014; 8(AUG)                                  | non pertinent |
| 4142 | Marks et al.,         | 2014 | Trials. 2014; 15:503                                                           | non pertinent |
| 4143 | Margaret et al.,      | 2014 | BMJ Open. 2014; 4(10)                                                          | non pertinent |
| 4144 | Marek et al.,         | 2014 | Alzheimer's & dementia. 2014; 10(5 Suppl):364-373                              | non pertinent |
| 4145 | Marciniak et al.,     | 2014 | World j of gastroenterology. 2014; 20(43):16323-16333                          | non pertinent |
| 4146 | Mannick et al.,       | 2014 | Science translational medicine. 2014; 6(268):268ra179                          | non pertinent |
| 4147 | Manitpisitkul et al., | 2014 | Epilepsy research. 2014; 108(9):1519-1532                                      | non pertinent |
| 4148 | Manchikanti et al.,   | 2014 | Pain Physician. 2014; 17(1):E61-74                                             | non pertinent |
| 4149 | Mamolo et al.,        | 2014 | J Eur Acad Dermatol Venereol. 2014; 28(2):192-203                              | non pertinent |
| 4150 | Mamell et al.,        | 2014 | Rheumatology international. 2014; 34(8):1047-1052                              | non pertinent |
| 4151 | Maksimow et al.,      | 2014 | PLoS One. 2014; 9(11):e113616                                                  | non pertinent |
| 4152 | Maintz et al.,        | 2014 | J of tropical medicine. 2014                                                   | non pertinent |
| 4153 | Mainardi et al.,      | 2014 | J of Pain. 2014; 15(4):388-394                                                 | non pertinent |
| 4154 | Maheu et al.,         | 2014 | Annals of the rheumatic diseases. 2014; 73(2):376-384                          | non pertinent |
| 4155 | Macdonald et al.,     | 2014 | Medicine and science in sports and exercise. 2014; 46(1):131-142               | non pertinent |
| 4156 | Lumba-Brown et al.,   | 2014 | Pediatric emergency care. 2014; 30(3):139-145                                  | non pertinent |

|      |                        |      |                                                                 |               |
|------|------------------------|------|-----------------------------------------------------------------|---------------|
| 4157 | Lueken et al.,         | 2014 | Psychol Med. 2014; 44(2):381-394                                | non pertinent |
| 4158 | Lueken et al.,         | 2014 | European neuropsychopharmacology. 2014; 24:142-                 | non pertinent |
| 4159 | Ludidi et al.,         | 2014 | Neurogastroenterology and motility. 2014; 26(5):705-714         | non pertinent |
| 4160 | Luciano et al.,        | 2014 | J of the experimental analysis of behavior. 2014; 101(1):94-111 | non pertinent |
| 4161 | Lotvall et al.,        | 2014 | J of negative results in biomedicine. 2014; 13(1)               | non pertinent |
| 4162 | Lonsdorf et al.,       | 2014 | Soc Cogn Affect Neurosci. 2014; 9(12):1973-1983                 | non pertinent |
| 4163 | Lonsdorf et al.,       | 2014 | Psychopharmacology (Berl). 2014; 231(9):1949-1962               | non pertinent |
| 4164 | Lohmander et al.,      | 2014 | Arthritis & rheumatology (hoboken, N.J.). 2014; 66(7):1820-1831 | non pertinent |
| 4165 | Lockwood et al.,       | 2014 | Fertility and sterility. 2014; 101(1):112-119.e113              | non pertinent |
| 4166 | Lluch et al.,          | 2014 | J Manipulative Physiol Ther. 2014; 37(9):660-666                | non pertinent |
| 4167 | Llanos-Cuentas et al., | 2014 | Lancet (london, england). 2014; 383(9922):1049-1058             | non pertinent |
| 4168 | Liu et al.,            | 2014 | Menopause (New York, N.Y.). 2014; 21(6):653-660                 | non pertinent |
| 4169 | Liu et al.,            | 2014 | Gut. 2014; 63(9):1410-1415                                      | non pertinent |
| 4170 | Liu et al.,            | 2014 | Clinical interventions in aging. 2014; 9:341-350                | non pertinent |
| 4171 | Liu et al.,            | 2014 | J of palliative medicine. 2014; 17(7):837-840                   | non pertinent |
| 4172 | Liu et al.,            | 2014 | Chinese medical j. 2014; 127(5):825-829                         | non pertinent |
| 4173 | Ling et al.,           | 2014 | Chinese medical j. 2014; 127(5):905-910                         | non pertinent |
| 4174 | Lindsay et al.,        | 2014 | Trials. 2014; 15:12                                             | non pertinent |

|      |                   |      |                                                                   |               |
|------|-------------------|------|-------------------------------------------------------------------|---------------|
| 4175 | Lin et al.,       | 2014 | International J of Psychophysiology. 2014; 94(3):292-297          | non pertinent |
| 4176 | Lin et al.,       | 2014 | J of child and adolescent psychopharmacology. 2014; 24(4):190-200 | non pertinent |
| 4177 | Lim et al.,       | 2014 | J of bone and joint surgery. American volume. 2014; 96(7):597-602 | non pertinent |
| 4178 | Lim et al.,       | 2014 | BMC infectious diseases. 2014; 14:530                             | non pertinent |
| 4179 | Liebowitz et al., | 2014 | American j of psychiatry. 2014; 171(6):675-682                    | non pertinent |
| 4180 | Libri et al.,     | 2014 | British j of anaesthesia. 2014; 112(2):337-347                    | non pertinent |
| 4181 | Liao et al.,      | 2014 | Chinese j of contemporary pediatrics. 2014; 16(5):508-512         | non pertinent |
| 4182 | Liang et al.,     | 2014 | Human vaccines & immunotherapeutics. 2014; 10(5):1382-1390        | non pertinent |
| 4183 | Li et al.,        | 2014 | Human vaccines & immunotherapeutics. 2014; 10(3):557-565          | non pertinent |
| 4184 | Li et al.,        | 2014 | J of endourology/Endourology Society. 2014; 28(7):881-886         | non pertinent |
| 4185 | Li et al.,        | 2014 | New England j of medicine. 2014; 370(9):829-837                   | non pertinent |
| 4186 | Li et al.,        | 2014 | Chinese j of tissue engineering research. 2014; 18(34):5561-5565  | non pertinent |
| 4187 | Lewis et al.,     | 2014 | J of bone and mineral research. 2014; 29(11):2489-2497            | non pertinent |
| 4188 | Levy et al.,      | 2014 | J of clinical oncology. 2014; 32(17):1797-1803                    | non pertinent |
| 4189 | Levy et al.,      | 2014 | American j of transplantation. 2014; 14(3):635-646                | non pertinent |
| 4190 | Levy et al.,      | 2014 | Annals of oncology. 2014; 25(12):2351-2356                        | non pertinent |

|      |                      |      |                                                                                                                                                    |               |
|------|----------------------|------|----------------------------------------------------------------------------------------------------------------------------------------------------|---------------|
| 4191 | Levy et al.,         | 2014 | J of thoracic oncology. 2014; 9(7):1031-1035                                                                                                       | non pertinent |
| 4192 | Letko et al.,        | 2014 | Female pelvic medicine & reconstructive medicine. 2014; 20:291-292                                                                                 | non pertinent |
| 4193 | Leownorasate et al., | 2014 | Chotmai het thangphaet (J of the Medical Association of Thailand). 2014; 97(12):1332-1337                                                          | non pertinent |
| 4194 | Lelic et al.,        | 2014 | Neuropharmacology. 2014; 77:422-427                                                                                                                | non pertinent |
| 4195 | Lei et al.,          | 2014 | Hua zhong ke ji da xue xue bao. Yi xue Ying De wen ban (J of Huazhong University of Science and Technology. Medical sciences). 2014; 34(4):616-620 | non pertinent |
| 4196 | Lee et al.,          | 2014 | J of clinical endocrinology and metabolism. 2014; 99(9):3153-3159                                                                                  | non pertinent |
| 4197 | Lee et al.,          | 2014 | Eur Neuropsychopharmacology. 2014; 24(9):1483-1491                                                                                                 | non pertinent |
| 4198 | Lee et al.,          | 2014 | Respiratory medicine. 2014; 109(1):54-62                                                                                                           | non pertinent |
| 4199 | Lee et al.,          | 2014 | Scandinavian j of gastroenterology. 2014; 49(8):917-924                                                                                            | non pertinent |
| 4200 | Lee et al.,          | 2014 | Investigational new drugs. 2014; 32(3):561-568                                                                                                     | non pertinent |
| 4201 | Lee et al.,          | 2014 | Yonsei medical j. 2014; 55(4):928-936                                                                                                              | non pertinent |
| 4202 | Lee et al.,          | 2014 | J Shoulder Elbow Surg. 2014; 23(3):e53-60                                                                                                          | non pertinent |
| 4203 | Lee et al.,          | 2014 | New England j of medicine. 2014; 370(25):2377-2386                                                                                                 | non pertinent |
| 4204 | Lee et al.,          | 2014 | Endoscopy. 2014; 46(4):291-298                                                                                                                     | non pertinent |
| 4205 | Lee et al.,          | 2014 | J of the National Cancer Institute. 2014; 106(12)                                                                                                  | non pertinent |

|      |                   |      |                                                                          |               |
|------|-------------------|------|--------------------------------------------------------------------------|---------------|
| 4206 | Lean et al.,      | 2014 | International j of obesity (2005). 2014; 38(5):689-697                   | non pertinent |
| 4207 | Le Lamer et al.,  | 2014 | J of translational medicine. 2014; 12(1)                                 | non pertinent |
| 4208 | Le Guen et al.,   | 2014 | Anesthesiology. 2014; 120(2):355-364                                     | non pertinent |
| 4209 | Lawitz et al.,    | 2014 | Lancet (london, england). 2014; 383(9916):515-523                        | non pertinent |
| 4210 | Laursen et al.,   | 2014 | The lancet. Respiratory medicine. 2014; 2(8):638-646                     | non pertinent |
| 4211 | Lauretti et al.,  | 2014 | The korean j of pain. 2014; 27(4):345-352                                | non pertinent |
| 4212 | Laurà et al.,     | 2014 | Muscle & nerve. 2014; 50(3):366-371                                      | non pertinent |
| 4213 | Latner et al.,    | 2014 | Appetite. 2014; 77:77-82                                                 | non pertinent |
| 4214 | Larsen et al.,    | 2014 | Breast cancer: targets and therapy. 2014; 6:179-189                      | non pertinent |
| 4215 | Langer et al.,    | 2014 | J of clinical oncology. 2014; 32(19):2059-2066                           | non pertinent |
| 4216 | Landis et al.,    | 2014 | BMC Urol. 2014; 14:58                                                    | non pertinent |
| 4217 | Lamothe et al.,   | 2014 | PLoS One. 2014; 9(6)                                                     | non pertinent |
| 4218 | Lalla et al.,     | 2014 | Oral Oncol. 2014; 50(11):1098-1103                                       | non pertinent |
| 4219 | Lai et al.,       | 2014 | Gut. 2014; 63(6):996-1004                                                | non pertinent |
| 4220 | Labrie et al.,    | 2014 | J of sexual medicine. 2014; 11(7):1766-1785                              | non pertinent |
| 4221 | La Cesa et al.,   | 2014 | Magn Reson Imaging. 2014; 32(3):236-240                                  | non pertinent |
| 4222 | Kwon et al.,      | 2014 | The lancet. Oncology. 2014; 15(7):700-712                                | non pertinent |
| 4223 | Kutluk et al.,    | 2014 | European j of gastroenterology & hepatology. 2014; 26(11):1202-1208      | non pertinent |
| 4224 | Kurganova et al., | 2014 | Zhurnal nevrologii i psikiatrii imeni S.S. Korsakova. 2014; 114(6):31-37 | non pertinent |

|      |                 |      |                                                                     |               |
|------|-----------------|------|---------------------------------------------------------------------|---------------|
| 4225 | Kumar et al.,   | 2014 | JAMA dermatology. 2014; 150(10):1072-1078                           | non pertinent |
| 4226 | Krysiak et al., | 2014 | Cardiovascular therapeutics. 2014; 32(2):40-46                      | non pertinent |
| 4227 | Kruis et al.,   | 2014 | Gastroenterology. 2014; 146(5 SUPPL 1):-187                         | non pertinent |
| 4228 | Kroes et al.,   | 2014 | Neuroimage. 2014; 84:825-832                                        | non pertinent |
| 4229 | Krenk et al.,   | 2014 | J of clinical sleep medicine. 2014; 10(3):321-326                   | non pertinent |
| 4230 | Kowdley et al., | 2014 | New England j of medicine. 2014; 370(3):222-232                     | non pertinent |
| 4231 | Kowdley et al., | 2014 | New England j of medicine. 2014; 370(20):1879-1888                  | non pertinent |
| 4232 | Kosugi et al.,  | 2014 | J of pain and symptom management. 2014; 47(6):990-1000              | non pertinent |
| 4233 | Korkmaz et al., | 2014 | Paediatrics and international child health. 2014; 34(3):198-202     | non pertinent |
| 4234 | Koceja et al.,  | 2014 | J of rehabilitation research and development. 2014; 51(8):1331-1338 | non pertinent |
| 4235 | Knoop et al.,   | 2014 | Arthritis care & research. 2014; 66(1):63-68                        | non pertinent |
| 4236 | Kline et al.,   | 2014 | Circulation. Cardiovascular imaging. 2014; 7(1):66-73               | non pertinent |
| 4237 | Klein et al.,   | 2014 | J of affective disorders. 2014; 166:93-97                           | non pertinent |
| 4238 | Kita et al.,    | 2014 | Clinical therapeutics. 2014; 36(12):1958-1971                       | non pertinent |
| 4239 | Kim et al.,     | 2014 | J of oral and maxillofacial surgery. 2014; 72(7):1281-1290          | non pertinent |
| 4240 | Kim et al.,     | 2014 | Spine j. 2014; 14(8):1559-1566                                      | non pertinent |
| 4241 | Kim et al.,     | 2014 | J Clin Monit Comput. 2014; 28(4):371-376                            | non pertinent |
| 4242 | Kim et al.,     | 2014 | Gut and liver. 2014; 8(4):371-379                                   | non pertinent |



|      |                              |      |                                                                             |               |
|------|------------------------------|------|-----------------------------------------------------------------------------|---------------|
| 4243 | Kim et al.,                  | 2014 | Human vaccines & immunotherapeutics. 2014; 10(9):2656-2663                  | non pertinent |
| 4244 | Kibuuka et al.,              | 2014 | Lancet. 2014; 385(9977):1545-1554                                           | non pertinent |
| 4245 | Khodayari-Rostamabad et al., | 2014 | Conf Proc IEEE Eng Med Biol Soc; 2014:4290-4293                             | non pertinent |
| 4246 | Khodaie-Ardakani et al.,     | 2014 | Psychiatry research. 2014; 215(3):540-546                                   | non pertinent |
| 4247 | Khan et al.,                 | 2014 | J canadien d'anesthesie ( Canadian j of anaesthesia). 2014; 61(3):242-248   | non pertinent |
| 4248 | Kessner et al.,              | 2014 | PLoS One. 2014; 9(9):e109014                                                | non pertinent |
| 4249 | Kct – Ki-Ok                  | 2014 | CRIS – Clinical Research Information Service. 2014                          | non pertinent |
| 4250 | Kaufman et al.,              | 2014 | Human gene therapy. 2014; 25(5):452-460                                     | non pertinent |
| 4251 | Kassubek et al.,             | 2014 | BMC neurology. 2014; 14:42                                                  | non pertinent |
| 4252 | Karlson et al.,              | 2014 | Cardiology. 2014; 127(2):73-82                                              | non pertinent |
| 4253 | Kapusuz et al.,              | 2014 | Biomed research international. 2014                                         | non pertinent |
| 4254 | Kanungo et al.,              | 2014 | PLoS One. 2014; 9(7):e99381                                                 | non pertinent |
| 4255 | Kane et al.,                 | 2014 | J of clinical psychiatry. 2014; 75(11):1254-1260                            | non pertinent |
| 4256 | Kamboj et al.,               | 2014 | European j of pain (London, England). 2014; 18(10):1376-1384                | non pertinent |
| 4257 | Kalita et al.,               | 2014 | J of the neurological sciences. 2014; 342(1-2):127-132                      | non pertinent |
| 4258 | Kahn et al.,                 | 2014 | Lancet. 2014; 383(9920):880-888                                             | non pertinent |
| 4259 | Jung et al.,                 | 2014 | Arthroscopy – j of arthroscopic and related surgery. 2014; 30(10):1261-1268 | non pertinent |
| 4260 | Jprn, Umin – Tatsuhiko       | 2014 | UMIN-CTR Clinical Trial. 2014                                               | non pertinent |
| 4261 | Jprn, Umin – Meigen          | 2014 | UMIN-CTR Clinical Trial. 2014                                               | non pertinent |

|      |                                    |      |                                                                                       |               |
|------|------------------------------------|------|---------------------------------------------------------------------------------------|---------------|
| 4262 | Jprn, Umin – Shimada               | 2014 | UMIN-CTR Clinical Trial. 2014                                                         | non pertinent |
| 4263 | Joo et al.,                        | 2014 | J Clin Anesth. 2014; 26(6):475-479                                                    | non pertinent |
| 4264 | Joly et al.,                       | 2014 | BJU international. 2014; 115(1):65-73                                                 | non pertinent |
| 4265 | Johansson et al.,                  | 2014 | Brain injury. 2014; 28(3):304-310                                                     | non pertinent |
| 4266 | Ji et al.,                         | 2014 | Clinical therapeutics. 2014; 36(1):84-100.e109                                        | non pertinent |
| 4267 | Jensen et al.,                     | 2014 | J Pain. 2014; 15(12):1328-1337                                                        | non pertinent |
| 4268 | Jenkins et al.,                    | 2014 | J of bone and joint surgery. American volume. 2014; 96(10):851-858                    | non pertinent |
| 4269 | Jahangard et al.,                  | 2014 | European neuropsychopharmacology. 2014; 24(8):1210-1221                               | non pertinent |
| 4270 | Jagla et al.,                      | 2014 | Pain. 2014; 155(10):2056-2062                                                         | non pertinent |
| 4271 | Jafari et al.,                     | 2014 | Archives of Iranian medicine. 2014; 17(7):466-470                                     | non pertinent |
| 4272 | Iveson et al.,                     | 2014 | The lancet. Oncology. 2014; 15(9):1007-1018                                           | non pertinent |
| 4273 | Ittichaikulthol et al.,            | 2014 | Chotmaihet thangphaet (J of the Medical Association of Thailand). 2014; 97(7):705-709 | non pertinent |
| 4274 | Isrctn – Schaefer                  | 2014 | ISRCTN Registry. 2014                                                                 | non pertinent |
| 4275 | Isrctn – Alberts                   | 2014 | ISRCTN Registry. 2014                                                                 | non pertinent |
| 4276 | Ishoy et al.,                      | 2014 | BMJ Open. 2014; 4(1)                                                                  | non pertinent |
| 4277 | Irct2014031016919N - Tavakkolizade | 2014 | IRCT – Iranian Registry of Clinical Trials. 2014                                      | non pertinent |
| 4278 | Irct201407228717N - Asgari         | 2014 | IRCT – Iranian Registry of Clinical Trials. 2014                                      | non pertinent |
| 4279 | Irct201407048872N - Saeedi         | 2014 | IRCT – Iranian Registry of Clinical Trials. 2014                                      | non pertinent |
| 4280 | Inagaki et al.,                    | 2014 | Psychosomatic medicine. 2014; 76(3):A-108                                             | non pertinent |

|      |                           |      |                                                                     |               |
|------|---------------------------|------|---------------------------------------------------------------------|---------------|
| 4281 | Ilfeld et al.,            | 2014 | Regional anesthesia and pain medicine. 2014; 39(2):89-96            | non pertinent |
| 4282 | Ihle et al.,              | 2014 | Pain. 2014; 155(10):2080-2087                                       | non pertinent |
| 4283 | Hysek et al.,             | 2014 | The international j of neuropsychopharmacology. 2014; 17(3):371-381 | non pertinent |
| 4284 | Hye et al.,               | 2014 | J of vascular surgery. 2014; 60(2):454-461.e451                     | non pertinent |
| 4285 | Hwang et al.,             | 2014 | Int J Rehabil Res. 2014; 37(2):167-172                              | non pertinent |
| 4286 | Hussein et al.,           | 2014 | Eur Spine J. 2014; 23(9):1992-1999                                  | non pertinent |
| 4287 | Husebo et al.,            | 2014 | European j of pain (London, England). 2014; 18(10):1419-1430        | non pertinent |
| 4288 | Hughbanks-Wheaton et al., | 2014 | Investigative ophthalmology & visual science. 2014; 55(8):4958-4966 | non pertinent |
| 4289 | Huei Hern                 | 2014 | Irish j of medical science. 2014; 183(4 SUPPL 1):176-178            | non pertinent |
| 4290 | Huang et al.,             | 2014 | J of arthroplasty. 2014; 29(12):2342-2346                           | non pertinent |
| 4291 | Huang et al.,             | 2014 | Human vaccines and immunotherapeutics. 2014; 10(1):2790-2795        | non pertinent |
| 4292 | Hu et al.,                | 2014 | Chinese medical j. 2014; 127(15):2721-2726                          | non pertinent |
| 4293 | Howard et al.,            | 2014 | Cardiovascular diabetology. 2014; 13(1)                             | non pertinent |
| 4294 | Hoskin et al.,            | 2014 | The lancet. Oncology. 2014; 15(12):1397-1406                        | non pertinent |
| 4295 | Hosbond et al.,           | 2014 | Atherosclerosis. 2014; 236(2):230-236                               | non pertinent |
| 4296 | Horta de Marcedo et al.,  | 2014 | Psychiatry research. 2014; 220(1-2):125-128                         | non pertinent |
| 4297 | Hopkins et al.,           | 2014 | American j of respiratory and critical care medicine. 2014; 189     | non pertinent |

|      |                       |      |                                                                  |               |
|------|-----------------------|------|------------------------------------------------------------------|---------------|
| 4298 | Homan et al.,         | 2014 | Int J Neuropsychopharmacol. 2014; 17(9):1419-1428                | non pertinent |
| 4299 | Hollander             | 2014 | Neuropsychopharmacology. 2014; 39:63                             | non pertinent |
| 4300 | Hollanda et al.,      | 2014 | Neurology international. 2014; 6(4):70-73                        | non pertinent |
| 4301 | Hoeger Bement et al., | 2014 | J Clin Neurophysiol. 2014; 31(1):94-98                           | non pertinent |
| 4302 | Hobl et al.,          | 2014 | J of the American College of Cardiology. 2014; 63(7):630-635     | non pertinent |
| 4303 | Hirsh et al.,         | 2014 | J of thoracic oncology. 2014; 9(1):83-90                         | non pertinent |
| 4304 | Hirsch et al.,        | 2014 | Clinical J of Pain. 2014; 30(12):1023-1032                       | non pertinent |
| 4305 | Heyse et al.,         | 2014 | Clinical orthopaedics and related research. 2014; 472(1):272-276 | non pertinent |
| 4306 | Herbinger et al.,     | 2014 | Human vaccines and immunotherapeutics. 2014; 10(1):2768-2775     | non pertinent |
| 4307 | Heo et al.,           | 2014 | Digestive and liver disease. 2014; 46(11):980-984                | non pertinent |
| 4308 | Henry et al.,         | 2014 | J of diabetes and its complications. 2014; 28(3):393-398         | non pertinent |
| 4309 | Henley et al.,        | 2014 | Current medical research and opinion. 2014; 30(10):2021-2032     | non pertinent |
| 4310 | Heller et al.,        | 2014 | J of ocular pharmacology and therapeutics. 2014; 30(10):815-822  | non pertinent |
| 4311 | Heinemann et al.,     | 2014 | The lancet. Oncology. 2014; 15(10):1065-1075                     | non pertinent |
| 4312 | Hedengran et al.,     | 2014 | Lipids. 2014; 50(2):165-175                                      | non pertinent |
| 4313 | Hayton et al.,        | 2014 | PLoS One. 2014; 9(7)                                             | non pertinent |
| 4314 | Hawkes et al.,        | 2014 | American j of tropical medicine and hygiene. 2014; 91(5):452-    | non pertinent |
| 4315 | Hawkes et al.,        | 2014 | Contemporary clinical trials. 2014; 39(1):14-21                  | non pertinent |

|      |                     |      |                                                                                                                     |               |
|------|---------------------|------|---------------------------------------------------------------------------------------------------------------------|---------------|
| 4316 | Hatherill et al.,   | 2014 | Vaccine. 2014; 32(31):3982-3988                                                                                     | non pertinent |
| 4317 | Haruna et al.,      | 2014 | J of interferon & cytokine research. 2014; 34(2):111-116                                                            | non pertinent |
| 4318 | Harfterkamp et al., | 2014 | J of child and adolescent psychopharmacology. 2014; 24(9):481-485                                                   | non pertinent |
| 4319 | Hansen              | 2014 | Danish medical j. 2014; 61(2):B4801                                                                                 | non pertinent |
| 4320 | Han et al.,         | 2014 | J korean geriatr soc. 2014; 18(3):153-161                                                                           | non pertinent |
| 4321 | Hammitt et al.,     | 2014 | PLoS One. 2014; 9(1)                                                                                                | non pertinent |
| 4322 | Hamada              | 2014 | J of oral and maxillofacial surgery. 2014; 72(9):e91-e92                                                            | non pertinent |
| 4323 | Halliday et al.,    | 2014 | PLoS medicine. 2014; 11(1)                                                                                          | non pertinent |
| 4324 | Hall et al.,        | 2014 | European j of cancer (Oxford, England : 1990). 2014; 50(14):2375-2389                                               | non pertinent |
| 4325 | Haffizulla et al.,  | 2014 | The lancet. Infectious diseases. 2014; 14(7):609-618                                                                | non pertinent |
| 4326 | Hadji et al.,       | 2014 | Breast cancer research and treatment. 2014; 144(2):343-351                                                          | non pertinent |
| 4327 | Hackett et al.,     | 2014 | International j of clinical practice. 2014; 68(2):203-215                                                           | non pertinent |
| 4328 | Gupta et al.,       | 2014 | Int J Pediatr Otorhinolaryngol. 2014; 78(10):1686-1691                                                              | non pertinent |
| 4329 | Guo et al.,         | 2014 | Supportive care in cancer. 2014; 22(5):1223-1231                                                                    | non pertinent |
| 4330 | Guo et al.,         | 2014 | Chinese j of experimental traditional medical formulae (zhong guo shi yan fang ji xue za zhi). 2014; 20(15):195-199 | non pertinent |
| 4331 | Guhn et al.,        | 2014 | Frontiers in behavioral neuroscience. 2014; 8(FEB)                                                                  | non pertinent |
| 4332 | Guerrini et al.,    | 2014 | Epilepsia. 2014; 55(4):568-578                                                                                      | non pertinent |

|      |                             |      |                                                                                 |               |
|------|-----------------------------|------|---------------------------------------------------------------------------------|---------------|
| 4333 | Gubelin Harcha et al.,      | 2014 | J of the American Academy of Dermatology. 2014; 70(3):489-498-498               | non pertinent |
| 4334 | Guan et al.,                | 2014 | Zhongguo gu shang (China j of orthopaedics and traumatology). 2014; 27(1):13-16 | non pertinent |
| 4335 | Grillon et al.,             | 2014 | Neuropsychopharmacology. 2014; 40(5):1064-1071                                  | non pertinent |
| 4336 | Gracies et al.,             | 2014 | Archives of physical medicine and rehabilitation. 2014; 95(7):1303-1311         | non pertinent |
| 4337 | Gowin et al.,               | 2014 | Neuropsychopharmacology. 2014; 39:274                                           | non pertinent |
| 4338 | Gorka et al.,               | 2014 | Int J Neuropsychopharmacology. 2014; 18(3)                                      | non pertinent |
| 4339 | Gorka et al.,               | 2014 | J Psychopharmacol. 2014; 28(12):1115-1124                                       | non pertinent |
| 4340 | Gordon et al.,              | 2014 | British j of dermatology. 2014; 170(3):705-715                                  | non pertinent |
| 4341 | Gonzales et al.,            | 2014 | Clinical pharmacology and therapeutics. 2014; 96(3):390-396                     | non pertinent |
| 4342 | Goldstein-Piekarski et al., | 2014 | Neuropsychopharmacology. 2014; 39:249                                           | non pertinent |
| 4343 | Goldberg et al.,            | 2014 | British j of ophthalmology. 2014; 98(7):926-931                                 | non pertinent |
| 4344 | Gold et al.,                | 2014 | J of drugs in dermatology. 2014; 13(11):1380-1386                               | non pertinent |
| 4345 | Gokhale et al.,             | 2014 | Experimental hematology and oncology. 2014; 3(1)                                | non pertinent |
| 4346 | Gohil et al.,               | 2014 | Knee Surg Sports Traumatol Arthrosc. 2014; 22(5):1090-1096                      | non pertinent |
| 4347 | Goforth et al.,             | 2014 | Sleep. 2014; 37(6):1053-1060                                                    | non pertinent |
| 4348 | Goebel et al.,              | 2014 | Trials. 2014; 15:404                                                            | non pertinent |
| 4349 | Gligorov et al.,            | 2014 | The lancet. Oncology. 2014; 15(12):1351-1360                                    | non pertinent |

|      |                          |      |                                                                              |               |
|------|--------------------------|------|------------------------------------------------------------------------------|---------------|
| 4350 | Giovannoni et al.,       | 2014 | The lancet.<br>Neurology. 2014;<br>13(5):472-481                             | non pertinent |
| 4351 | Gimenez et al.,          | 2014 | J Rheumatol.<br>2014; 41(11):2240-<br>2248                                   | non pertinent |
| 4352 | Gimenez et al.,          | 2014 | Eur<br>Neuropsychophar<br>macol. 2014;<br>24(1):105-116                      | non pertinent |
| 4353 | Gibson et al.,           | 2014 | Schizophrenia<br>research. 2014;<br>156(2-3):261-265                         | non pertinent |
| 4354 | Giannantoni et al.,      | 2014 | Urology. 2014;<br>83(2):400-405                                              | non pertinent |
| 4355 | Gewandter et al.,        | 2014 | Supportive care in<br>cancer. 2014;<br>22(7):1807-1814                       | non pertinent |
| 4356 | Germain et al.,          | 2014 | Sleep. 2014;<br>37:A276-                                                     | non pertinent |
| 4357 | Geraghty et al.,         | 2014 | BMJ Open. 2014;<br>4(7):e005871                                              | non pertinent |
| 4358 | George et al.,           | 2014 | Brain stimulation.<br>2014; 7(3):421-<br>431                                 | non pertinent |
| 4359 | Genovese et al.,         | 2014 | J of rheumatology.<br>2014; 41(4):629-<br>639                                | non pertinent |
| 4360 | Geisthoff et al.,        | 2014 | Thrombosis<br>research. 2014;<br>134(3):565-571                              | non pertinent |
| 4361 | Gay et al.,              | 2014 | J Manipulative<br>Physiol Ther.<br>2014; 37(9):614-<br>627                   | non pertinent |
| 4362 | Gasser et al.,           | 2014 | J of nervous and<br>mental disease.<br>2014; 202(7):513-<br>520              | non pertinent |
| 4363 | Garvey et al.,           | 2014 | Diabetes care.<br>2014; 37(12):3309-<br>3316                                 | non pertinent |
| 4364 | Garcia-Manero et<br>al., | 2014 | American j of<br>hematology. 2014;<br>89(9):E156-E162                        | non pertinent |
| 4365 | Garbelotti et al.,       | 2014 | Gait Posture.<br>2014; 40(1):150-<br>153                                     | non pertinent |
| 4366 | Gao et al.,              | 2014 | J of cranio-maxillo-<br>facial surgery.<br>2014; 42(8):1577-<br>1582         | non pertinent |
| 4367 | Gadelha et al.,          | 2014 | The lancet.<br>Diabetes &<br>endocrinology.<br>2014; 2(11):875-<br>884       | non pertinent |
| 4368 | Fu et al.,               | 2014 | British j of<br>anaesthesia. 2014;<br>112(3):506-513                         | non pertinent |
| 4369 | Fu et al.,               | 2014 | Clinical<br>schizophrenia &<br>related psychoses.<br>2014; 8(2):101-<br>109A | non pertinent |

|      |                     |      |                                                                    |               |
|------|---------------------|------|--------------------------------------------------------------------|---------------|
| 4370 | Frijling et al.,    | 2014 | European<br>neuropsychophar<br>macology. 2014;<br>24:602           | non pertinent |
| 4371 | French et al.,      | 2014 | Acta neurologica<br>scandinavica.<br>2014; 129(3):143-<br>153      | non pertinent |
| 4372 | Frederiksen et al., | 2014 | European<br>neuropsychophar<br>macology. 2014;<br>24(12):1873-1884 | non pertinent |
| 4373 | Franconi et al.,    | 2014 | Neurological<br>sciences. 2014;<br>35(SUPPL 1):99-<br>105          | non pertinent |
| 4374 | Francavilla et al., | 2014 | J of clinical<br>gastroenterology.<br>2014; 48(5):407-<br>413      | non pertinent |
| 4375 | Fracalanza et al.,  | 2014 | J Anxiety Disord.<br>2014; 28(6):559-<br>569                       | non pertinent |
| 4376 | Ford et al.,        | 2014 | British j of clinical<br>pharmacology.<br>2014; 78(3):498-<br>508  | non pertinent |
| 4377 | Ford et al.,        | 2014 | The lancet.<br>Oncology. 2014;<br>15(1):78-86                      | non pertinent |
| 4378 | Forcelini et al.,   | 2014 | Neurogastroenter<br>ol Motil. 2014;<br>26(2):187-195               | non pertinent |
| 4379 | Fooladi et al.,     | 2014 | J of sexual<br>medicine. 2014;<br>11(3):831-839                    | non pertinent |
| 4380 | Flodin et al.,      | 2014 | Brain<br>connectivity.<br>2014; 4(8):587-<br>594                   | non pertinent |
| 4381 | Flaim et al.,       | 2014 | J of the american<br>heart association.<br>2014; 3(2)              | non pertinent |
| 4382 | Fizazi et al.,      | 2014 | The lancet.<br>Oncology. 2014;<br>15(10):1147-1156                 | non pertinent |
| 4383 | Fizazi et al.,      | 2014 | The lancet.<br>Oncology. 2014;<br>15(9):975-985                    | non pertinent |
| 4384 | Finckh et al.,      | 2014 | Arthritis research<br>& therapy. 2014;<br>16(5):458                | non pertinent |
| 4385 | Figus et al.,       | 2014 | Eye (london,<br>england). 2014;<br>28(4):422-429                   | non pertinent |
| 4386 | Ferrucci et al.,    | 2014 | Melanoma<br>research. 2014;<br>25(3):239-245                       | non pertinent |
| 4387 | Fernandes et al.,   | 2014 | J of sexual<br>medicine. 2014;<br>11(5):1262-1270                  | non pertinent |
| 4388 | Fayed et al.,       | 2014 | CNS neuroscience<br>& therapeutics.<br>2014; 20(11):999-<br>1007   | non pertinent |



|      |                     |      |                                                                    |               |
|------|---------------------|------|--------------------------------------------------------------------|---------------|
| 4389 | Favrat et al.,      | 2014 | PLoS One. 2014; 9(4):e94217                                        | non pertinent |
| 4390 | Fanelli et al.,     | 2014 | Minerva Anesthesiologica. 2014; 80(1):66-75                        | non pertinent |
| 4391 | Fan et al.,         | 2014 | Annals of surgical oncology. 2014; 21(12):3876-3881                | non pertinent |
| 4392 | Fallah et al.,      | 2014 | Arch Iran Med. 2014; 17(11):741-745                                | non pertinent |
| 4393 | Eudract_number - ?  | 2014 | ?                                                                  | non pertinent |
| 4394 | Euctr N.L.          | 2014 | EU Clinical Trial Register. 2014                                   | non pertinent |
| 4395 | Euctr H.R.          | 2014 | EU Clinical Trial Register. 2014                                   | non pertinent |
| 4396 | Euctr E.S.          | 2014 | EU Clinical Trial Register. 2014                                   | non pertinent |
| 4397 | Euctr D.K.          | 2014 | EU Clinical Trial Register. 2014                                   | non pertinent |
| 4398 | Euctr D.E.          | 2014 | EU Clinical Trial Register. 2014                                   | non pertinent |
| 4399 | Euctr C.Z.          | 2014 | EU Clinical Trial Register. 2014                                   | non pertinent |
| 4400 | Esposito et al.,    | 2014 | Eur J Oral Implantol. 2014; 7(2):129-137                           | non pertinent |
| 4401 | Espey et al.,       | 2014 | American j of obstetrics and gynecology. 2014; 210(3):208.e201-205 | non pertinent |
| 4402 | Eslamparast et al., | 2014 | American j of clinical nutrition. 2014; 99(3):535-542              | non pertinent |
| 4403 | Eskin et al.,       | 2014 | J of emergency medicine. 2014; 47(1):65-70                         | non pertinent |
| 4404 | Escalante et al.,   | 2014 | Cancer j (sudbury, mass.). 2014; 20(1):8-14                        | non pertinent |
| 4405 | Emslie et al.,      | 2014 | J of child and adolescent psychopharmacology. 2014; 24(4):170-179  | non pertinent |
| 4406 | Emmert et al.,      | 2014 | Frontiers in behavioral neuroscience. 2014; 8(OCT)                 | non pertinent |
| 4407 | Ellis et al.,       | 2014 | The lancet. Oncology. 2014; 15(12):1379-1388                       | non pertinent |
| 4408 | El-Kheir et al.,    | 2014 | Cell transplantation. 2014; 23(6):729-745                          | non pertinent |
| 4409 | Eckstein et al.,    | 2014 | Neuropsychopharmacology. 2014; 39:192-193                          | non pertinent |
| 4410 | Eberl et al.,       | 2014 | Techniques in coloproctology. 2014; 18(8):745-752                  | non pertinent |

|      |                      |      |                                                                                 |               |
|------|----------------------|------|---------------------------------------------------------------------------------|---------------|
| 4411 | Eathakkattu et al.,  | 2014 | Internal medicine j. 2014; 44:5-<br>Lancet Oncol.                               | non pertinent |
| 4412 | Dutton et al.,       | 2014 | 2014; 15(8):894-<br>904                                                         | non pertinent |
| 4413 | Dunlop et al.,       | 2014 | Trials. 2014;<br>15:240                                                         | non pertinent |
| 4414 | Ducieux et al.,      | 2014 | European j of<br>cancer. 2014;<br>50(18):3098-3106                              | non pertinent |
| 4415 | Dubeau et al.,       | 2014 | J of urology. 2014;<br>191(2):395-404                                           | non pertinent |
| 4416 | Du et al.,           | 2014 | J of clinical<br>gastroenterology.<br>2014; 48(4):328-<br>335                   | non pertinent |
| 4417 | Du Bois et al.,      | 2014 | J of clinical<br>oncology. 2014;<br>32(30):3374-3381                            | non pertinent |
| 4418 | Droitcourt et al.,   | 2014 | Chest. 2014;<br>146(4):1046-1054                                                | non pertinent |
| 4419 | Dreicer et al.,      | 2014 | Clinical cancer<br>research. 2014;<br>20(5):1335-1344                           | non pertinent |
| 4420 | Douillard et al.,    | 2014 | Clinical colorectal<br>cancer. 2014;<br>13(1):14-26.e11                         | non pertinent |
| 4421 | Doslikova et al.,    | 2014 | Osteoarthritis and<br>cartilage. 2014;<br>22:89                                 | non pertinent |
| 4422 | Dong et al.,         | 2014 | J of neurosurgery:<br>spine. 2014;<br>20(1):53-59                               | non pertinent |
| 4423 | Doedee et al.,       | 2014 | PLoS One. 2014;<br>9(6)                                                         | non pertinent |
| 4424 | Dodick et al.,       | 2014 | The lancet.<br>Neurology. 2014;<br>13(9):885-892                                | non pertinent |
| 4425 | Dodick et al.,       | 2014 | The lancet<br>neurology. 2014;<br>13(11):1100-1107                              | non pertinent |
| 4426 | Dilger et al.,       | 2014 | J of Crohn's &<br>colitis. 2014;<br>8(9):970-980                                | non pertinent |
| 4427 | Difede et al.,       | 2014 | Neuropsychophar<br>macology. 2014;<br>39(5):1052-1058                           | non pertinent |
| 4428 | Diamond et al.,      | 2014 | Reproductive<br>sciences<br>(thousands oaks,<br>calif.). 2014;<br>21(3):363-371 | non pertinent |
| 4429 | Diamant et al.,      | 2014 | The lancet.<br>Diabetes &<br>endocrinology.<br>2014; 2(6):464-<br>473           | non pertinent |
| 4430 | Di Simplicio et al., | 2014 | Psychol Med.<br>2014; 44(2):241-<br>252                                         | non pertinent |
| 4431 | Di Cicco et al.,     | 2014 | J of cystic fibrosis.<br>2014; 13(4):455-<br>460                                | non pertinent |

|      |                      |      |                                                                         |               |
|------|----------------------|------|-------------------------------------------------------------------------|---------------|
| 4432 | Dewhirst et al.,     | 2014 | International j of pediatric otorhinolaryngology. 2014; 78(7):1090-1094 | non pertinent |
| 4433 | Devlin et al.,       | 2014 | Chest. 2014; 145(6):1204-1212                                           | non pertinent |
| 4434 | Devane et al.,       | 2014 | Current medical research and opinion. 2014; 30(6):1179-1187             | non pertinent |
| 4435 | Detke et al.,        | 2014 | J of clinical psychopharmacology. 2014; 34(4):426-434                   | non pertinent |
| 4436 | Detert et al.,       | 2014 | Trials. 2014; 15(1)                                                     | non pertinent |
| 4437 | Denison et al.,      | 2014 | Diabetes, obesity & metabolism. 2014; 16(4):334-343                     | non pertinent |
| 4438 | Demant et al.,       | 2014 | Pain. 2014; 155(11):2263-2273                                           | non pertinent |
| 4439 | Dehghani et al.,     | 2014 | J of isfahan medical school. 2014; 31(267):2155-2161                    | non pertinent |
| 4440 | Deharo et al.,       | 2014 | Annales de cardiologie ET d'angiologie. 2014; 63(4):222-227             | non pertinent |
| 4441 | Deeks                | 2014 | Biodrugs. 2014; 28(4):403-410                                           | non pertinent |
| 4442 | De Wit et al.,       | 2014 | Diabetologia. 2014; 57(9):1812-1819                                     | non pertinent |
| 4443 | De Waele et al.,     | 2014 | Surgical infections. 2014; 15(5):567-575                                | non pertinent |
| 4444 | De Kam et al.,       | 2014 | Platelets. 2014; 25(7):480-487                                          | non pertinent |
| 4445 | De Francesco et al., | 2014 | J of medical microbiology. 2014; 63(Pt 5):748-752                       | non pertinent |
| 4446 | Davis et al.,        | 2014 | Cancer j (united states). 2014; 20(5):330-344                           | non pertinent |
| 4447 | Dang et al.,         | 2014 | Drug design, development and therapy. 2014; 8:1441-1449                 | non pertinent |
| 4448 | Dancey et al.,       | 2014 | Experimental brain research. 2014; 232(9):2879-2889                     | non pertinent |
| 4449 | Dall'Agnol et al.,   | 2014 | J of Pain. 2014; 15(8):845-855                                          | non pertinent |
| 4450 | Daggett et al.,      | 2014 | Brain injury. 2014; 28(5-6):554-555                                     | non pertinent |

|      |                      |      |                                                                                      |               |
|------|----------------------|------|--------------------------------------------------------------------------------------|---------------|
| 4451 | Cuzick et al.,       | 2014 | Lancet (london, england). 2014; 383(9922):1041-1048                                  | non pertinent |
| 4452 | Cuttler et al.,      | 2014 | J Subst Abuse Treat. 2014; 47(4):299-305                                             | non pertinent |
| 4453 | Cutler et al.,       | 2014 | J of the American Academy of Child and Adolescent Psychiatry. 2014; 53(10):1092-1101 | non pertinent |
| 4454 | Cummings et al.,     | 2014 | Vaccine. 2014; 32(19):2251-2259                                                      | non pertinent |
| 4455 | Crockett et al.,     | 2014 | Proc Natl Acad Sci U S A. 2014; 111(48):17320-17325                                  | non pertinent |
| 4456 | Cravioto et al.,     | 2014 | Contraception. 2014; 90(2):147-153                                                   | non pertinent |
| 4457 | Cranston et al.,     | 2014 | AIDS research and human retroviruses. 2014; 30(2):184-189                            | non pertinent |
| 4458 | Craggs et al.,       | 2014 | J Pain. 2014; 15(4):435-446                                                          | non pertinent |
| 4459 | Courcoulas et al.,   | 2014 | JAMA surgery. 2014; 149(7):707-715                                                   | non pertinent |
| 4460 | Costantini et al.,   | 2014 | International urogynecology j. 2014; 25(9):1173-1178                                 | non pertinent |
| 4461 | Corsini-Munt et al., | 2014 | Trials. 2014; 15(1)                                                                  | non pertinent |
| 4462 | Corrie et al.,       | 2014 | The lancet. Oncology. 2014; 15(6):620-630                                            | non pertinent |
| 4463 | Cornwell et al.,     | 2014 | Behav Brain Res. 2014; 261:258-264                                                   | non pertinent |
| 4464 | Corey et al.,        | 2014 | Antimicrobial agents and chemotherapy. 2014; 58(11):6518-6527                        | non pertinent |
| 4465 | Cooper et al.,       | 2014 | Health technology assessment (Winchester, England). 2014; 18(54):1-128               | non pertinent |
| 4466 | Cook et al.,         | 2014 | The lancet. Oncology. 2014; 15(8):874-885                                            | non pertinent |
| 4467 | Constantine et al.,  | 2014 | Pediatric emergency care. 2014; 30(7):474-478                                        | non pertinent |
| 4468 | Conroy et al.,       | 2014 | The lancet. Oncology. 2014; 15(3):305-314                                            | non pertinent |
| 4469 | Coll et al.,         | 2014 | Cytotherapy. 2014; 16:97-98                                                          | non pertinent |

|      |                                                                   |      |                                                                                          |               |
|------|-------------------------------------------------------------------|------|------------------------------------------------------------------------------------------|---------------|
| 4470 | Cohen et al.,                                                     | 2014 | Anesthesiology.<br>2014; 121(5):1045-1055                                                | non pertinent |
| 4471 | Cohen et al.,                                                     | 2014 | Pain medicine<br>(Malden, Mass.).<br>2014; 15(4):588-602                                 | non pertinent |
| 4472 | Coffey et al.,                                                    | 2014 | Emergency<br>medicine j. 2014;<br>31(8):613-618                                          | non pertinent |
| 4473 | Clausen et al.,                                                   | 2014 | Trials. 2014; 15(1)                                                                      | non pertinent |
| 4474 | Choy et al.,                                                      | 2014 | BMC Cancer.<br>2014; 14(1)                                                               | non pertinent |
| 4475 | Chopra et al.,                                                    | 2014 | Arthritis &<br>rheumatology<br>(hoboken, N.J.).<br>2014; 66(2):319-326                   | non pertinent |
| 4476 | Chong et al.,                                                     | 2014 | Phytotherapy<br>research: PTR.<br>2014; 28(10):1520-1526                                 | non pertinent |
| 4477 | Choi et al.,                                                      | 2014 | International j of<br>clinical<br>pharmacology and<br>therapeutics.<br>2014; 52(1):55-63 | non pertinent |
| 4478 | Cho et al.,                                                       | 2014 | Europace. 2014;<br>16(7):1000-1006                                                       | non pertinent |
| 4479 | Chi – Peking<br>University School<br>& Hospital of<br>Stomatology | 2014 | Chinese Clinical<br>Trial Registry.<br>2014                                              | non pertinent |
| 4480 | Chi – Guangdong<br>999 Brain Hospital                             | 2014 | Chinese Clinical<br>Trial Registry.<br>2014                                              | non pertinent |
| 4481 | Chey et al.,                                                      | 2014 | New England j of<br>medicine. 2014;<br>370(25):2387-2396                                 | non pertinent |
| 4482 | Chen et al.,                                                      | 2014 | Sci Rep. 2014;<br>4:6482                                                                 | non pertinent |
| 4483 | Chen et al.,                                                      | 2014 | Clinical<br>pharmacokinetics.<br>2014; 53(11):1033-1044                                  | non pertinent |
| 4484 | Charles et al.,                                                   | 2014 | Parkinsonism &<br>related disorders.<br>2014; 20(7):731-737                              | non pertinent |
| 4485 | Chapman et al.,                                                   | 2014 | J<br>Psychopharmacol.<br>2014; 28(12):1135-1142                                          | non pertinent |
| 4486 | Chang et al.,                                                     | 2014 | Academic<br>emergency<br>medicine. 2014;<br>21(3):228-235                                | non pertinent |
| 4487 | Chandon et al.,                                                   | 2014 | PLoS One. 2014;<br>9(8)                                                                  | non pertinent |

|      |                         |      |                                                                                |               |
|------|-------------------------|------|--------------------------------------------------------------------------------|---------------|
| 4488 | Chan et al.,            | 2014 | J of the american medical directors association. 2014; 15(8):607.e605-607.e612 | non pertinent |
| 4489 | Chan et al.,            | 2014 | International j of radiation oncology, biology, physics. 2014; 90(4):756-764   | non pertinent |
| 4490 | Cecchetti et al.,       | 2014 | Trials. 2014; 15(1)                                                            | non pertinent |
| 4491 | Catley et al.,          | 2014 | Manual therapy. 2014; 19(5):461-466                                            | non pertinent |
| 4492 | Carrieri et al.,        | 2014 | PLoS One. 2014; 9(11)                                                          | non pertinent |
| 4493 | Cannata et al.,         | 2014 | Minerva Anestesiologica. 2014; 80(1):58-65                                     | non pertinent |
| 4494 | Camuri et al.,          | 2014 | European neuropsychopharmacology. 2014; 24:61-62                               | non pertinent |
| 4495 | Campisi et al.,         | 2014 | Osteoarthritis and cartilage. 2014; 22:475-476                                 | non pertinent |
| 4496 | Campbell et al.,        | 2014 | Neurobiology of aging. 2014; 35(10):2246-2248                                  | non pertinent |
| 4497 | Cady et al.,            | 2014 | Headache. 2014; 54(1):80-93                                                    | non pertinent |
| 4498 | Cabido et al.,          | 2014 | J Strength Cond Res. 2014; 28(4):1050-1057                                     | non pertinent |
| 4499 | Butts et al.,           | 2014 | The lancet. Oncology. 2014; 15(1):59-68                                        | non pertinent |
| 4500 | Burke et al.,           | 2014 | American j of hematology. 2014; 89(9):889-895                                  | non pertinent |
| 4501 | Bureau et al.,          | 2014 | AJNR Am J Neuroradiol. 2014; 35(8):1467-1474                                   | non pertinent |
| 4502 | Buijze et al.,          | 2014 | J Hand Surg Am. 2014; 39(4):621-627                                            | non pertinent |
| 4503 | Bugarski-Kirola et al., | 2014 | European neuropsychopharmacology. 2014; 24(7):1024-1036                        | non pertinent |
| 4504 | Bucci et al.,           | 2014 | Techniques in coloproctology. 2014; 18(4):345-353                              | non pertinent |
| 4505 | Bruinsma et al.,        | 2014 | BMC musculoskeletal disorders. 2014; 15(1)                                     | non pertinent |
| 4506 | Breitschaft et al.,     | 2014 | Diabetes research and clinical practice. 2014; 103(3):458-465                  | non pertinent |

|      |                          |      |                                                                                                  |               |
|------|--------------------------|------|--------------------------------------------------------------------------------------------------|---------------|
| 4507 | Boyle et al.,            | 2014 | The lancet.<br>Respiratory<br>medicine. 2014;<br>2(7):527-538                                    | non pertinent |
| 4508 | Boyer et al.,            | 2014 | Neurology. 2014;<br>82(14):1231-1238                                                             | non pertinent |
| 4509 | Bowen et al.,            | 2014 | Lancet (london,<br>england). 2014;<br>384(9960):2132-<br>2140                                    | non pertinent |
| 4510 | Bot et al.,              | 2014 | Clinical<br>orthopaedics and<br>related research.<br>2014; 472(8):2542-<br>2549                  | non pertinent |
| 4511 | Bosma et al.,            | 2014 | Magn Reson<br>Imaging. 2014;<br>32(5):473-481                                                    | non pertinent |
| 4512 | Bortone et al.,          | 2014 | Paediatric<br>anaesthesia. 2014;<br>24(6):614-619                                                | non pertinent |
| 4513 | Böning et al.,           | 2014 | Hormone research<br>in paediatrics.<br>2014; 82:395-                                             | non pertinent |
| 4514 | Bonham                   | 2014 | Obstetrical &<br>gynecological<br>survey. 2014;<br>70(4):274-283                                 | non pertinent |
| 4515 | Bolinder et al.,         | 2014 | Diabetes, obesity<br>& metabolism.<br>2014; 16(2):159-<br>169                                    | non pertinent |
| 4516 | Boccard-Binet et<br>al., | 2014 | Stereotactic and<br>functional<br>neurosurgery.<br>2014; 92:38                                   | non pertinent |
| 4517 | Blom et al.,             | 2014 | New England j of<br>medicine. 2014;<br>370(19):1809-<br>1819                                     | non pertinent |
| 4518 | Blackhall et al.,        | 2014 | J of thoracic<br>oncology. 2014;<br>9(11):1625-1633                                              | non pertinent |
| 4519 | Biswal et al.,           | 2014 | International j of<br>clinical<br>pharmacology and<br>therapeutics.<br>2014; 52(11):996-<br>1004 | non pertinent |
| 4520 | Billy et al.,            | 2014 | Pm r. 2014;<br>6(9):790-795                                                                      | non pertinent |
| 4521 | Bieber et al.,           | 2014 | J of drugs in<br>dermatology.<br>2014; 13(7):791-<br>798                                         | non pertinent |
| 4522 | Bible et al.,            | 2014 | J of clinical<br>endocrinology and<br>metabolism. 2014;<br>99(5):1687-1693                       | non pertinent |
| 4523 | Bharti et al.,           | 2014 | Paediatric<br>anaesthesia. 2014;<br>24(11):1158-1163                                             | non pertinent |

|      |                         |      |                                                                       |               |
|------|-------------------------|------|-----------------------------------------------------------------------|---------------|
| 4524 | Berry et al.,           | 2014 | Global advances in health and medicine. 2014; 3(2):28-33              | non pertinent |
| 4525 | Bernasconi et al.,      | 2014 | Cerebral cortex (new york, N.Y. : 1991). 2014; 24(12):3221-3231       | non pertinent |
| 4526 | Berlin et al.,          | 2014 | BMJ (online). 2014; 348                                               | non pertinent |
| 4527 | Berende et al.,         | 2014 | BMC Infect Dis. 2014; 14:543                                          | non pertinent |
| 4528 | Benson et al.,          | 2014 | Brain, behavior and immunity. 2014; 40:e49                            | non pertinent |
| 4529 | Belfer et al.,          | 2014 | Pain Med. 2014; 15(9):1590-1602                                       | non pertinent |
| 4530 | Beken et al.,           | 2014 | J Child Neurol. 2014; 29(5):617-622                                   | non pertinent |
| 4531 | Beck et al.,            | 2014 | International j of colorectal disease. 2014; 29(12):1527-1534         | non pertinent |
| 4532 | Baumunk et al.,         | 2014 | Urologia internationalis. 2014; 93(2):193-201                         | non pertinent |
| 4533 | Batki et al.,           | 2014 | Alcoholism, clinical and experimental research. 2014; 38(8):2169-2177 | non pertinent |
| 4534 | Bath-Hextall et al.,    | 2014 | The lancet. Oncology. 2014; 15(1):96-105                              | non pertinent |
| 4535 | Basiri-Moghadam et al., | 2014 | JPMA. The j of the pakistan medical association. 2014; 64(8):874-878  | non pertinent |
| 4536 | Bartolo et al.,         | 2014 | J of the neurological sciences. 2014; 349(1-2):117-123                | non pertinent |
| 4537 | Bart et al.,            | 2014 | Science translational medicine. 2014; 6(234):234ra255                 | non pertinent |
| 4538 | Barrett-Lee et al.,     | 2014 | The lancet. Oncology. 2014; 15(1):114-122                             | non pertinent |
| 4539 | Barkan et al.,          | 2014 | Emergency medicine j. 2014; 31(8):649-653                             | non pertinent |
| 4540 | Barchuk et al.,         | 2014 | Pulmonary pharmacology & therapeutics. 2014; 29(1):15-23              | non pertinent |
| 4541 | Bang et al.,            | 2014 | Die pharmazie. 2014; 70(4):269-273                                    | non pertinent |
| 4542 | Ballinger et al.,       | 2014 | J Autism Dev Disord. 2014; 44(10):2536-2546                           | non pertinent |



|      |                    |      |                                                              |               |
|------|--------------------|------|--------------------------------------------------------------|---------------|
| 4543 | Ball et al.,       | 2014 | J of affective disorders. 2014; 167:215-223                  | non pertinent |
| 4544 | Balanescu et al.,  | 2014 | Annals of the rheumatic diseases. 2014; 73(9):1665-1672      | non pertinent |
| 4545 | Bakish et al.,     | 2014 | J of psychiatry & neuroscience. 2014; 39(1):40-49            | non pertinent |
| 4546 | Baas et al.,       | 2014 | Frontiers in behavioral neuroscience. 2014; 8(SEP)           | non pertinent |
| 4547 | Aysenne et al.,    | 2014 | Neurocritical care. 2014; 21(1 SUPPL 1):61                   | non pertinent |
| 4548 | Aurora et al.,     | 2014 | Acta neurologica scandinavica. 2014; 129(1):61-70            | non pertinent |
| 4549 | Auliac et al.,     | 2014 | Lung cancer (Amsterdam, Netherlands). 2014; 85(3):415-419    | non pertinent |
| 4550 | Auffret et al.,    | 2014 | American j of emergency medicine. 2014; 32(6):655-659        | non pertinent |
| 4551 | Atukunda et al.,   | 2014 | PLoS medicine. 2014; 11(11):e1001752                         | non pertinent |
| 4552 | Attie et al.,      | 2014 | American j of hematology. 2014; 89(7):766-770                | non pertinent |
| 4553 | Attarian et al.,   | 2014 | Orphanet j of rare diseases. 2014; 9(1)                      | non pertinent |
| 4554 | Attari et al.,     | 2014 | J of research in medical sciences. 2014; 19(7):592-598       | non pertinent |
| 4555 | Atsmon et al.,     | 2014 | Vaccine. 2014; 32(44):5816-5823                              | non pertinent |
| 4556 | Asrani et al.,     | 2014 | American j of transplantation. 2014; 14(2):356-366           | non pertinent |
| 4557 | Aslaksen et al.,   | 2014 | Exp Brain Res. 2014; 232(6):1865-1873                        | non pertinent |
| 4558 | Ashrafi et al.,    | 2014 | Pediatric neurology. 2014; 51(4):503-508                     | non pertinent |
| 4559 | Asadollahi et al., | 2014 | Headache. 2014; 54(1):94-108                                 | non pertinent |
| 4560 | Aronson et al.,    | 2014 | Diabetes care. 2014; 37(10):2746-2754                        | non pertinent |
| 4561 | Arnold et al.,     | 2014 | Current medical research and opinion. 2014; 30(10):2069-2083 | non pertinent |

|      |                   |      |                                                                 |               |
|------|-------------------|------|-----------------------------------------------------------------|---------------|
| 4562 | Areces et al.,    | 2014 | Amino acids. 2014; 46(5):1169-1176                              | non pertinent |
| 4563 | Arden et al.,     | 2014 | Current medical research and opinion. 2014; 30(2):279-286       | non pertinent |
| 4564 | Araujo et al.,    | 2014 | Regional anesthesia and pain medicine. 2014; 39(5 SUPPL 1):e321 | non pertinent |
| 4565 | Anseline et al.,  | 2014 | Photodiagnosis and photodynamic therapy. 2014; 11(4):467-471    | non pertinent |
| 4566 | André et al.,     | 2014 | The lancet. Oncology. 2014; 15(6):580-591                       | non pertinent |
| 4567 | Andersson et al., | 2014 | American j of cardiovascular drugs. 2014; 14(3):217-227         | non pertinent |
| 4568 | Amr et al.,       | 2014 | J of pain and symptom management. 2014; 48(5):944-956.e942      | non pertinent |
| 4569 | Amorim et al.,    | 2014 | Acta anaesthesiologica Scandinavica. 2014; 58(9):1101-1110      | non pertinent |
| 4570 | Amin et al.,      | 2014 | Lancet. 2014; 383(9927):1474-1482                               | non pertinent |
| 4571 | Amin et al.,      | 2014 | Brain. 2014; 137(Pt 3):779-794                                  | non pertinent |
| 4572 | Amemiya et al.,   | 2014 | J of atherosclerosis and thrombosis. 2014; 21(12):1298-1307     | non pertinent |
| 4573 | Alsallom et al.,  | 2014 | Neurosciences (Riyadh). 2014; 19(3):218-223                     | non pertinent |
| 4574 | Alberer et al.,   | 2014 | Travel medicine and infectious disease. 2014; 12(5):485-493     | non pertinent |
| 4575 | Alavi et al.,     | 2014 | Asian cardiovascular & thoracic annals. 2014; 22(6):694-699     | non pertinent |
| 4576 | Ahrén et al.,     | 2014 | Diabetologia. 2014; 57(7):1304-1307                             | non pertinent |
| 4577 | Ahmed et al.,     | 2014 | European neuropsychopharmacology. 2014; 24(9):1475-1482         | non pertinent |

|      |                          |      |                                                                    |               |
|------|--------------------------|------|--------------------------------------------------------------------|---------------|
| 4578 | Aggrawal et al.,         | 2014 | J of ayuverda and integrative medicine. 2014; 5(2):117-124         | non pertinent |
| 4579 | Adelman et al.,          | 2014 | J of General Internal Medicine. 2014; 29:371-                      | non pertinent |
| 4580 | Actrn – Rodriguez-Blanco | 2014 | Australian New Zealand Clinical Trials Registry. 2014              | non pertinent |
| 4581 | Actrn – Brosseau         | 2014 | Australian New Zealand Clinical Trials Registry. 2014              | non pertinent |
| 4582 | Actrn - Alvarez          | 2014 | Australian New Zealand Clinical Trials Registry. 2014              | non pertinent |
| 4583 | Abuelkheir et al.,       | 2014 | J of international medical research. 2014; 42(2):329-336           | non pertinent |
| 4584 | Abdulkadyrov et al.,     | 2014 | British j of haematology. 2014; 165(6):814-823                     | non pertinent |
| 4585 | Abdallah et al.,         | 2014 | Anesthesiology. 2014; 121(6):1302-1310                             | non pertinent |
| 4586 | Heinemann et al.,        | 2014 | Lancet Oncology. 2014; 15(10):1065-1075                            | non pertinent |
| 4587 | Moon et al.,             | 2014 | J of neurosurgery. 2014; 121(5):1085-1092                          | non pertinent |
| 4588 | Aronne et al.,           | 2014 | Postgraduate medicine. 2014; 126(6):7-18                           | non pertinent |
| 4589 | Tung et al.,             | 2014 | Annals of clinical and translational neurology. 2014; 1(9):633-638 | non pertinent |
| 4590 | EACTA Abstracts          | 2014 | Applied cardiopulmonary pathophysiology. 2014; 17(2):233-234       | non pertinent |
| 4591 | Zhang et al.,            | 2013 | J of alternative and complementary medicine. 2013; 19(7):A31       | non pertinent |
| 4592 | Zhang et al.,            | 2013 | Prog Neuropsychopharmacol Biol Psychiatry. 2013; 40:364-373        | non pertinent |
| 4593 | Zhang et al.,            | 2013 | Cardiology in the young. 2013; 23(1):54-60                         | non pertinent |

|      |                          |      |                                                                                   |               |
|------|--------------------------|------|-----------------------------------------------------------------------------------|---------------|
| 4594 | Yuan et al.,             | 2013 | Experimental<br>brain research.<br>2013; 226(1):15-<br>24                         | non pertinent |
| 4595 | Yim et al.,              | 2013 | Am J Sports Med.<br>2013; 41(7):1565-<br>1570                                     | non pertinent |
| 4596 | Yang et al.,             | 2013 | Vaccine. 2013;<br>31(40):4389-4397                                                | non pertinent |
| 4597 | Yang et al.,             | 2013 | Turkish j of<br>gastroenterology.<br>2013; 24(3):197-<br>203                      | non pertinent |
| 4598 | Yan et al.,              | 2013 | Asian pacific j of<br>tropical medicine.<br>2013; 6(11):912-<br>915               | non pertinent |
| 4599 | Wright et al.,           | 2013 | British j of clinical<br>pharmacology.<br>2013; 76(6):917-<br>931                 | non pertinent |
| 4600 | Wollmer et al.,          | 2013 | Toxicon. 2013;<br>68:72                                                           | non pertinent |
| 4601 | Williams et al.,         | 2013 | Contraception.<br>2013; 88(3):401-<br>407                                         | non pertinent |
| 4602 | Williams et al.,         | 2013 | Neuropsychophar<br>macology. 2013;<br>38:217-218                                  | non pertinent |
| 4603 | William Hanke et<br>al., | 2013 | Dermatologic<br>surgery. 2013;<br>39(6):891-899                                   | non pertinent |
| 4604 | Wijburg et al.,          | 2013 | Molecular<br>genetics and<br>metabolism. 2013;<br>108(2):99                       | non pertinent |
| 4605 | Wietecha et al.,         | 2013 | J of child and<br>adolescent<br>psychopharmacol<br>ogy. 2013;<br>23(9):605-613    | non pertinent |
| 4606 | Wickström et al.,        | 2013 | Acta obstetrica<br>ET gynecologica<br>scandinavica.<br>2013; 92(12):1375-<br>1382 | non pertinent |
| 4607 | Whiteley                 | 2013 | J of science and<br>medicine in sport.<br>2013; 16:e54-                           | non pertinent |
| 4608 | Werner et al.,           | 2013 | J of bone and joint<br>surgery. American<br>volume. 2013;<br>95(7):577-584        | non pertinent |
| 4609 | Weng et al.,             | 2013 | Psychol Sci. 2013;<br>24(7):1171-1180                                             | non pertinent |
| 4610 | Weiland et al.,          | 2013 | Molecular<br>therapy. 2013;<br>21(9):1796-1805                                    | non pertinent |
| 4611 | Weigand et al.,          | 2013 | Brain Stimul.<br>2013; 6(6):905-<br>912                                           | non pertinent |
| 4612 | Wegner et al.,           | 2013 | Brain, behavior,<br>and immunity.<br>2013; 29:19                                  | non pertinent |

|      |                     |      |                                                                 |               |
|------|---------------------|------|-----------------------------------------------------------------|---------------|
| 4613 | Wang-Gillam et al., | 2013 | Investigational new drugs. 2013; 31(3):707-713<br>BMC           | non pertinent |
| 4614 | Waller et al.,      | 2013 | Musculoskeletal Disord. 2013; 14:82                             | non pertinent |
| 4615 | Waibel et al.,      | 2013 | J Drugs Dermatol. 2013; 12(11):1237-1242                        | non pertinent |
| 4616 | Wadden et al.,      | 2013 | International j of obesity (2015). 2013; 37(11):1443-1451       | non pertinent |
| 4617 | Vourvahis et al.,   | 2013 | Antiviral therapy. 2013; 18(6):745-754                          | non pertinent |
| 4618 | Vorsanger et al.,   | 2013 | J of opioid management. 2013; 9(4):281-290                      | non pertinent |
| 4619 | Volz et al.,        | 2013 | PLoS One. 2013; 8(1):e52968                                     | non pertinent |
| 4620 | Villa et al.,       | 2013 | Leukemia & lymphoma. 2013; 54(7):1387-1395                      | non pertinent |
| 4621 | Vik-Mo et al.,      | 2013 | Cancer immunology, immunotherapy. 2013; 62(9):1499-1509         | non pertinent |
| 4622 | Verstovsek et al.,  | 2013 | Haematologica. 2013; 98(12):1865-1871                           | non pertinent |
| 4623 | Vera-Llonch et al., | 2013 | Alimentary pharmacology & therapeutics. 2013; 38(2):124-133     | non pertinent |
| 4624 | Vassal et al.,      | 2013 | Clin Neurophysiol. 2013; 124(9):1861-1867                       | non pertinent |
| 4625 | Vanuytsel et al.,   | 2013 | Neurogastroenterology and motility. 2013; 25(5):e353-361        | non pertinent |
| 4626 | Vanuytsel et al.,   | 2013 | Clinical gastroenterology and hepatology. 2013; 11(9):1115-1121 | non pertinent |
| 4627 | Van Zundert         | 2013 | Regional anesthesia and pain medicine. 2013; 38(5):E5-E8        | non pertinent |
| 4628 | Van Tiel et al.,    | 2013 | PLoS One. 2013; 8(11)                                           | non pertinent |
| 4629 | Van Ast et al.,     | 2013 | Biological psychiatry. 2013; 74(11):809-816                     | non pertinent |
| 4630 | Tzabazis et al.,    | 2013 | Mol Pain. 2013; 9:33                                            | non pertinent |

|      |                   |      |                                                                     |               |
|------|-------------------|------|---------------------------------------------------------------------|---------------|
| 4631 | Turkoz et al.,    | 2013 | Paediatr Anaesth. 2013; 23(11):1078-1083                            | non pertinent |
| 4632 | Tsujino et al.,   | 2013 | J of gastroenterology. 2013; 48(8):982-988                          | non pertinent |
| 4633 | Tse et al.,       | 2013 | J of clinical nursing. 2013; 22(13-14):1843-1856                    | non pertinent |
| 4634 | Tsai et al.,      | 2013 | Childs Nerv Syst. 2013; 29(7):1123-1129                             | non pertinent |
| 4635 | Truong et al.,    | 2013 | Circulation. 2013; 127(25):2494-2502                                | non pertinent |
| 4636 | Treister et al.,  | 2013 | Neuroscience letters. 2013; 548:115-119                             | non pertinent |
| 4637 | Töx et al.,       | 2013 | Endoscopy. 2013; 45(6):439-444                                      | non pertinent |
| 4638 | Toro et al.,      | 2013 | Supportive care in cancer. 2013; 21:139                             | non pertinent |
| 4639 | Thomaes et al.,   | 2013 | Soc Cogn Affect Neurosci. 2013; 8(2):190-200                        | non pertinent |
| 4640 | Terry et al.,     | 2013 | Pain. 2013; 154(12):2759-2768                                       | non pertinent |
| 4641 | Terburg et al.,   | 2013 | Neuropsychopharmacology. 2013; 38(13):2708-2716                     | non pertinent |
| 4642 | Taylor et al.,    | 2013 | Archives of physical medicine and rehabilitation. 2013; 94(10):e29- | non pertinent |
| 4643 | Taylor et al.,    | 2013 | Neuropsychopharmacology. 2013; 38:149-150                           | non pertinent |
| 4644 | Tanaka et al.,    | 2013 | Explore (new york, N.Y.). 2013; 9(2):82-86                          | non pertinent |
| 4645 | Tanaka et al.,    | 2013 | PLoS One. 2013; 8(11):e80731                                        | non pertinent |
| 4646 | Tabor et al.,     | 2013 | Pain. 2013; 154(10):1961-1965                                       | non pertinent |
| 4647 | Suzuki et al.,    | 2013 | Neuropsychiatric disease and treatment. 2013; 9:1281-1287           | non pertinent |
| 4648 | Suris et al.,     | 2013 | Annals of clinical psychiatry. 2013; 25(1):33-40                    | non pertinent |
| 4649 | Sulkowski et al., | 2013 | Annals of internal medicine. 2013; 159(2):86-96                     | non pertinent |
| 4650 | Sugimoto et al.,  | 2013 | World j of surgery. 2013; 37(10):2454-2457                          | non pertinent |
| 4651 | Stumpf et al.,    | 2013 | PLoS One. 2013; 8(11):e79123                                        | non pertinent |
| 4652 | Stefani et al.,   | 2013 | PLoS One. 2013; 8(10):e74107                                        | non pertinent |

|      |                         |      |                                                                |               |
|------|-------------------------|------|----------------------------------------------------------------|---------------|
| 4653 | Spaeth et al.,          | 2013 | Arthritis research & therapy. 2013; 15(6)                      | non pertinent |
| 4654 | Soliman et al.,         | 2013 | Experimental and clinical transplantation. 2013; 11(6):494-498 | non pertinent |
| 4655 | Smits et al.,           | 2013 | J of psychiatric research. 2013; 47(10):1455-1461              | non pertinent |
| 4656 | Smith et al.,           | 2013 | Breast cancer research and treatment. 2013; 142(2):381-388     | non pertinent |
| 4657 | Smaill et al.,          | 2013 | Science translational medicine. 2013; 5(205)                   | non pertinent |
| 4658 | Sloan-Lancaster et al., | 2013 | Diabetes care. 2013; 36(8):2239-2246                           | non pertinent |
| 4659 | Slingerland et al.,     | 2013 | Clinical therapeutics. 2013; 35(12):1946-1954                  | non pertinent |
| 4660 | Sieper et al.,          | 2013 | Annals of the rheumatic disease. 2013; 71                      | non pertinent |
| 4661 | Sidharta et al.,        | 2013 | J of clinical pharmacology. 2013; 53(11):1131-1138             | non pertinent |
| 4662 | Shepherd                | 2013 | Phlebology (pp. 1-65). 2013; 20(1):27-29                       | non pertinent |
| 4663 | Sheng et al.,           | 2013 | Biol Psychol. 2013; 92(2):380-386                              | non pertinent |
| 4664 | Shamay-Tsoory et al.,   | 2013 | Psychoneuroendocrinology. 2013; 38(12):3139-3144               | non pertinent |
| 4665 | Sewell                  | 2013 | Biological psychiatry. 2013; 73(9 SUPPL 1):46                  | non pertinent |
| 4666 | Sethi et al.,           | 2013 | Paediatric anaesthesia. 2013; 23(12):1131-1137                 | non pertinent |
| 4667 | Seminowicz et al.,      | 2013 | J of Pain. 2013; 14(12 SUPPL):1573-1584                        | non pertinent |
| 4668 | Seidman et al.,         | 2013 | Clinical breast cancer. 2013; 13(4):239-246.e231               | non pertinent |
| 4669 | Seddik et al.,          | 2013 | European j of clinical pharmacology. 2013; 69(9):1709-1715     | non pertinent |
| 4670 | Schneider et al.,       | 2013 | Emotion (Washington, D.C.). 2013; 13(5):852-866                | non pertinent |

|      |                      |      |                                                                        |               |
|------|----------------------|------|------------------------------------------------------------------------|---------------|
| 4671 | Schmid et al.,       | 2013 | Cardiovasc Ther. 2013; 31(3):e1-6                                      | non pertinent |
| 4672 | Schmid et al.,       | 2013 | Pain. 2013; 154(11):2372-2380                                          | non pertinent |
| 4673 | Schmid et al.,       | 2013 | Gastroenterology. 2013; 144(5 SUPPL 1):555                             | non pertinent |
| 4674 | Scheifele et al.,    | 2013 | Human vaccines & immunotherapeutics. 2013; 9(11):2460-2473             | non pertinent |
| 4675 | Scavuzzi et al.,     | 2013 | Human reproduction (Oxford, England). 2013; 28(8):2118-2125            | non pertinent |
| 4676 | Saxena et al.,       | 2013 | PLoS One. 2013; 8(3):e57685                                            | non pertinent |
| 4677 | Savaiano et al.,     | 2013 | Nutrition j. 2013; 12:160                                              | non pertinent |
| 4678 | Sassi et al.,        | 2013 | Neuromodulation. 2013; 16(5):401-406                                   | non pertinent |
| 4679 | Sarinopoulos et al., | 2013 | Patient Educ Couns. 2013; 90(2):220-225                                | non pertinent |
| 4680 | Sansone et al.,      | 2013 | J of orthopaedics and traumatology. 2013; 14(1):110-                   | non pertinent |
| 4681 | Sanga et al.,        | 2013 | Pain. 2013; 154(10):1910-1919                                          | non pertinent |
| 4682 | Sampath et al.,      | 2013 | Leukemia research. 2013; 37(11):1461-1467                              | non pertinent |
| 4683 | Salminen et al.,     | 2013 | Acta oncologica. 2013; 52(1):30-37                                     | non pertinent |
| 4684 | Sahlström et al.,    | 2013 | International J of Oral and Maxillofacial Surgery. 2013; 42(3):356-363 | non pertinent |
| 4685 | Rowland et al.,      | 2013 | Human vaccines and immunotherapeutics. 2013; 9(1):50-62                | non pertinent |
| 4686 | Rosenstock et al.,   | 2013 | Diabetes care. 2013; 36(3):498-504                                     | non pertinent |
| 4687 | Rosati et al.,       | 2013 | Cancer chemotherapy and pharmacology. 2013; 71(1):257-264              | non pertinent |
| 4688 | Rodrigues et al.,    | 2013 | Arg Bras Cardiol. 2013; 101(2):149-153                                 | non pertinent |
| 4689 | Roddy et al.,        | 2013 | Br J Gen Pract. 2013; 63(607):e141-148                                 | non pertinent |



|      |                            |      |                                                                                       |               |
|------|----------------------------|------|---------------------------------------------------------------------------------------|---------------|
| 4690 | Rochas et al.,             | 2013 | Cerebral cortex<br>(new york, N.Y. :<br>1991). 2014;<br>23(7):1517-1525               | non pertinent |
| 4691 | Robinson et al.,           | 2013 | Neuroimage.<br>2013; 78:217-223                                                       | non pertinent |
| 4692 | Robertson et al.,          | 2013 | Breast cancer<br>research. 2013;<br>15(2)                                             | non pertinent |
| 4693 | Ring et al.,               | 2013 | Biol Psychol.<br>2013; 93(3):373-<br>376                                              | non pertinent |
| 4694 | Rhee et al.,               | 2013 | Endocrine j. 2013;<br>60(2):167-172                                                   | non pertinent |
| 4695 | Reichmann                  | 2013 | J of neurology.<br>2013; 260:6-7                                                      | non pertinent |
| 4696 | Reginster                  | 2013 | Osteoporosis<br>international.<br>2013; 24(1 SUPPL<br>1):75-76                        | non pertinent |
| 4697 | Ravn et al.,               | 2013 | J of pain research.<br>2013; 6:23-38                                                  | non pertinent |
| 4698 | Rauck et al.,              | 2013 | Pain practice.<br>2013; 13(6):485-<br>496                                             | non pertinent |
| 4699 | Rajpal et al.,             | 2013 | Advances in<br>therapy. 2013;<br>30(10):907-923                                       | non pertinent |
| 4700 | Radulescu et al.,          | 2013 | PLoS One. 2013;<br>8(7):e68485                                                        | non pertinent |
| 4701 | Rabinak et al.,            | 2013 | Biological<br>psychiatry. 2013;<br>73(9 SUPPL 1):34                                   | non pertinent |
| 4702 | Rabago et al.,             | 2013 | American j of<br>physical medicine<br>& rehabilitation.<br>2013; 92(7):587-<br>596    | non pertinent |
| 4703 | Rabago et al.,             | 2013 | Archives of<br>physical medicine<br>and rehabilitation.<br>2013; 94(11):2075-<br>2082 | non pertinent |
| 4704 | Rabago et al.,             | 2013 | PM and r. 2013;<br>5(9):225-                                                          | non pertinent |
| 4705 | Quigley et al.,            | 2013 | Vox sanguinis.<br>2013; 105:250-251                                                   | non pertinent |
| 4706 | Purdon et al.,             | 2013 | Proc Natl Acad<br>Sci U S A. 2013;<br>110(12):E1142-<br>1151                          | non pertinent |
| 4707 | Pujade-Lauraine<br>et al., | 2013 | J of clinical<br>oncology. 2013;<br>31(15 SUPPL 1)                                    | non pertinent |
| 4708 | Predel et al.,             | 2013 | BMC<br>musculoskeletal<br>disorders. 2013; 14                                         | non pertinent |
| 4709 | Prasad et al.,             | 2013 | Schizophrenia<br>bulletin. 2013;<br>39(4):857-866                                     | non pertinent |

|      |                   |      |                                                                       |               |
|------|-------------------|------|-----------------------------------------------------------------------|---------------|
| 4710 | Polacco et al,    | 2013 | European j of inflammation. 2013; 11(3):847-853                       | non pertinent |
| 4711 | Plow et al,       | 2013 | Trials. 2013; 14:241                                                  | non pertinent |
| 4712 | Pietsch et al,    | 2013 | Knee Surg Sports Traumatol Arthrosc. 2013; 21(10):2234-2240           | non pertinent |
| 4713 | Pienta et al,     | 2013 | Investigational new drugs. 2013; 31(3):760-768                        | non pertinent |
| 4714 | Perry et al,      | 2013 | JAMA – j of the american medical association. 2013; 310(12):1248-1255 | non pertinent |
| 4715 | Perrino et al,    | 2013 | Clinical drug investigation. 2013; 33(6):441-449                      | non pertinent |
| 4716 | Pereyra et al,    | 2013 | World j of gastroenterology. 2013; 19(31):5103-5110                   | non pertinent |
| 4717 | Pereira et al,    | 2013 | Experimental neurology. 2013; 239:248-255                             | non pertinent |
| 4718 | Perdikakis et al, | 2013 | Skeletal Radiol. 2013; 42(1):99-105                                   | non pertinent |
| 4719 | Pépin et al,      | 2013 | Vaccine. 2013; 31(47):5572-5578                                       | non pertinent |
| 4720 | Peolsson et al,   | 2013 | Spine (Phila Pa 1976). 2013; 38(4):300-307                            | non pertinent |
| 4721 | Pelletier et al,  | 2013 | Basic and clinical pharmacology and toxicology. 2013; 113:17          | non pertinent |
| 4722 | Peciña et al,     | 2013 | Neuropsychopharmacology. 2013; 38(4):639-646                          | non pertinent |
| 4723 | Pavia-Ruz et al,  | 2013 | Human vaccines and immunotherapeutics. 2013; 9(9):1978-1988           | non pertinent |
| 4724 | Paulis et al,     | 2013 | Inflammation and allergy – drug targets. 2013; 12(1):61-67            | non pertinent |
| 4725 | Patua et al,      | 2013 | Archives of gynecology and obstetrics. 2013; 288(6):1243-1248         | non pertinent |
| 4726 | Park et al,       | 2013 | J of nutritional biochemistry. 2013; 24(7):1367-1372                  | non pertinent |
| 4727 | Parente et al,    | 2013 | International j of colorectal disease. 2013; 28(10):1423-1431         | non pertinent |

|      |                        |      |                                                                                                |               |
|------|------------------------|------|------------------------------------------------------------------------------------------------|---------------|
| 4728 | Papanicolaou et al.,   | 2013 | J of nutrition, health & aging. 2013; 17(6):533-543                                            | non pertinent |
| 4729 | Pan et al.,            | 2013 | Wei mian yu gan ran za zhi (J of microbiology, immunology, and infection). 2013; 46(6):448-455 | non pertinent |
| 4730 | Packer et al.,         | 2013 | JACC. Heart failure. 2013; 1(4):308-314                                                        | non pertinent |
| 4731 | Ouedraogo et al.,      | 2013 | PLoS One. 2013; 8(11)                                                                          | non pertinent |
| 4732 | Otsyula et al.,        | 2013 | Malaria j. 2013; 12(1)                                                                         | non pertinent |
| 4733 | Ostenson et al.,       | 2013 | Diabetes, metabolic syndrome and obesity: targets and therapy. 2013; 6:171-185                 | non pertinent |
| 4734 | Orellana Silva et al., | 2013 | Pain medicine (united states). 2013; 14(3):422-429                                             | non pertinent |
| 4735 | Onesti et al.,         | 2013 | European j of pain (London, England). 2013; 17(9):1347-1356                                    | non pertinent |
| 4736 | Omair et al.,          | 2013 | BMC musculoskeletal disorders. 2013; 14:105                                                    | non pertinent |
| 4737 | Oka et al.,            | 2013 | Psychotherapy and psychosomatics. 2013; 82:78-79                                               | non pertinent |
| 4738 | Ojurongbe et al.,      | 2013 | J of infection in developing countries. 2013; 7(12):975-982                                    | non pertinent |
| 4739 | Ohtori et al.,         | 2013 | Spine. 2013; 38(8):E487-E492                                                                   | non pertinent |
| 4740 | Ohtori et al.,         | 2013 | Yonsei medical j. 2013; 54(5):1253-1258                                                        | non pertinent |
| 4741 | Odekerken et al.,      | 2013 | The lancet. Neurology. 2013; 12(1):37-44                                                       | non pertinent |
| 4742 | Nwankwo et al.,        | 2013 | Investigational new drugs. 2013; 31(3):653-660                                                 | non pertinent |
| 4743 | Ntr - Helmond          | 2013 | Netherlands Trial Register. 2013                                                               | non pertinent |
| 4744 | Ntr - Schotanus        | 2013 | Netherlands Trial Register. 2013                                                               | non pertinent |
| 4745 | Ntr - Lith             | 2013 | Netherlands Trial Register. 2013                                                               | non pertinent |
| 4746 | Novack et al.,         | 2013 | J of ocular pharmacology and therapeutics. 2013; 29(7):674-680                                 | non pertinent |

|      |                                             |      |                                                                                   |               |
|------|---------------------------------------------|------|-----------------------------------------------------------------------------------|---------------|
| 4747 | Nolte et al.,                               | 2013 | Ann Hematol. 2013; 92(2):191-198                                                  | non pertinent |
| 4748 | Niesvizky et al.,                           | 2013 | Clinical cancer research. 2013; 19(8):2248-2256                                   | non pertinent |
| 4749 | Nicholas et al.,                            | 2013 | Neurology. 2013; 80(1 MeetingAbstracts )                                          | non pertinent |
| 4750 | Nguyen et al.,                              | 2013 | Gastrointestinal endoscopy. 2013; 78(6):892-901                                   | non pertinent |
| 4751 | Newhouse et al.,                            | 2013 | Neuropsychopharmacology. 2013; 38(13):2632-2643                                   | non pertinent |
| 4752 | Newcorn et al.,                             | 2013 | J of the American Academy of Child and Adolescent Psychiatry. 2013; 52(9):921-930 | non pertinent |
| 4753 | Nesioonpour et al.,                         | 2013 | Hernia. 2013; 17(4):465-470                                                       | non pertinent |
| 4754 | Nes et al.,                                 | 2013 | Patient education and counseling. 2013; 93(3):451-458                             | non pertinent |
| 4755 | Nelson et al.,                              | 2013 | Trials. 2013; 14:325                                                              | non pertinent |
| 4756 | Nct - Rustaden                              | 2013 | National Library of Medicine. 2013                                                | non pertinent |
| 4757 | Nct – Ishibe et al.,                        | 2013 | Surg Endosc. 2017 Oct; 31(10):3890-3897                                           | non pertinent |
| 4758 | Nct – Toritani et al.,                      | 2013 | Int J Colorectal Dis. 2019 Jul; 34(7):1211-1220                                   | non pertinent |
| 4759 | Nct – Chiu                                  | 2013 | National Library of Medicine. 2013                                                | non pertinent |
| 4760 | Nct – Duarte                                | 2013 | National Library of Medicine. 2013                                                | non pertinent |
| 4761 | Nct – Randelli et al.,                      | 2013 | J Arthroplasty. 2019 Jul; 34(7):1374-1381                                         | non pertinent |
| 4762 | Nct – Longmuir                              | 2013 | National Library of Medicine. 2013                                                | non pertinent |
| 4763 | Nct – Clinical Sciences & Operations Sanofi | 2013 | National Library of Medicine. 2013                                                | non pertinent |
| 4764 | Nct – Hendler                               | 2013 | National Library of Medicine. 2013                                                | non pertinent |
| 4765 | Nct – Camilleri                             | 2013 | National Library of Medicine. 2013                                                | non pertinent |
| 4766 | Nct – Boyles                                | 2013 | National Library of Medicine. 2013                                                | non pertinent |
| 4767 | Nct – Naranjo-Rodriguez                     | 2013 | National Library of Medicine. 2013                                                | non pertinent |
| 4768 | Nct – Johnson                               | 2013 | National Library of Medicine. 2013                                                | non pertinent |
| 4769 | Nct – Datta                                 | 2013 | National Library of Medicine. 2013                                                | non pertinent |
| 4770 | Nct – Paulus                                | 2013 | National Library of Medicine. 2013                                                | non pertinent |
| 4771 | Nct – Curatolo                              | 2013 | National Library of Medicine. 2013                                                | non pertinent |

|      |                                 |      |                                                               |               |
|------|---------------------------------|------|---------------------------------------------------------------|---------------|
| 4772 | Nct – Finnes et al.,            | 2013 | J Occup Health Psychol. 2019 Feb.; 24(1):198-212              | non pertinent |
| 4773 | Nct – AgoneX Biopharmaceuticals | 2013 | National Library of Medicine. 2013                            | non pertinent |
| 4774 | Nct – Somers et al.,            | 2013 | JMIR Mhealth Uhealth. 2018 Mar; 6(3):e66                      | non pertinent |
| 4775 | Nct – Silva                     | 2013 | National Library of Medicine. 2013                            | non pertinent |
| 4776 | Nct – Lau                       | 2013 | National Library of Medicine. 2013                            | non pertinent |
| 4777 | Nct – Agarwal                   | 2013 | National Library of Medicine. 2013                            | non pertinent |
| 4778 | Nct – Haythornthwaite           | 2013 | National Library of Medicine. 2013                            | non pertinent |
| 4779 | Nct – Sørensen                  | 2013 | National Library of Medicine. 2013                            | non pertinent |
| 4780 | Nct – Yarnitsky                 | 2013 | National Library of Medicine. 2013                            | non pertinent |
| 4781 | Nct – OSF Healthcare System     | 2013 | National Library of Medicine. 2013                            | non pertinent |
| 4782 | Nct – DiProspero                | 2013 | National Library of Medicine. 2013                            | non pertinent |
| 4783 | Nct – Tarragó                   | 2013 | National Library of Medicine. 2013                            | non pertinent |
| 4784 | Nct – Ehde                      | 2013 | National Library of Medicine. 2013                            | non pertinent |
| 4785 | Nct – Caumo                     | 2013 | National Library of Medicine. 2013                            | non pertinent |
| 4786 | Nct – Pickrell                  | 2013 | National Library of Medicine. 2013                            | non pertinent |
| 4787 | Nct – Straudi                   | 2013 | National Library of Medicine. 2013                            | non pertinent |
| 4788 | Nct – Thorn                     | 2013 | National Library of Medicine. 2013                            | non pertinent |
| 4789 | Nct – Thomas                    | 2013 | National Library of Medicine. 2013                            | non pertinent |
| 4790 | Nct – Simons                    | 2013 | National Library of Medicine. 2013                            | non pertinent |
| 4791 | Nct – Schlegel                  | 2013 | National Library of Medicine. 2013                            | non pertinent |
| 4792 | Naumann et al.,                 | 2013 | Strahlenther Onkol. 2013; 189(9):745-752                      | non pertinent |
| 4793 | Nasa et al.,                    | 2013 | Indian j of gastroenterology. 2013; 32(6):392-396             | non pertinent |
| 4794 | Motomura et al.,                | 2013 | PLoS One. 2013; 8(2):e56578                                   | non pertinent |
| 4795 | Moreno-Duarte et al.,           | 2013 | Topics in spinal cord injury rehabilitation. 2013; 19(1):9-10 | non pertinent |
| 4796 | Moore et al.,                   | 2013 | Pain medicine (Malden, Mass.). 2013; 14(11):1730-1740         | non pertinent |
| 4797 | Moodie et al.,                  | 2013 | Pain medicine (Malden, Mass.). 2013; 14(6):916-924            | non pertinent |

|      |                    |      |                                                                     |               |
|------|--------------------|------|---------------------------------------------------------------------|---------------|
| 4798 | Montag et al.,     | 2013 | Eur Arch Psychiatry Clin Neurosci. 2013; 263 Suppl 2: 169-175       | non pertinent |
| 4799 | Monfort et al.,    | 2013 | Arthritis and rheumatism. 2013; 65:913-914                          | non pertinent |
| 4800 | Mondelli et al.,   | 2013 | Neurophysiologie clinique. 2013; 43(4):205-215                      | non pertinent |
| 4801 | Mohebati et al.,   | 2013 | Cancer prevention research (philadelphia, pa.). 2013; 6(7):646-655  | non pertinent |
| 4802 | Mohammadi et al.,  | 2013 | Clinical neuropharmacology. 2013; 36(6):179-184                     | non pertinent |
| 4803 | Moein et al.,      | 2013 | Brain injury. 2013; 27(12):1454-1460                                | non pertinent |
| 4804 | Modabber et al.,   | 2013 | Trials. 2013; 14:238                                                | non pertinent |
| 4805 | Mochizuki et al.,  | 2013 | Pain. 2013; 154(10):1989-1998                                       | non pertinent |
| 4806 | Miner et al.,      | 2013 | Acad Emerg Med. 2013; 20(4):330-337                                 | non pertinent |
| 4807 | Miguel et al.,     | 2013 | The lancet. Oncology. 2013; 14(11):1055-1066                        | non pertinent |
| 4808 | Meulenbeld et al., | 2013 | Cancer chemotherapy and pharmacology. 2013; 72(4):909-916           | non pertinent |
| 4809 | Messier et al.,    | 2013 | BMC musculoskeletal disorders. 2013; 14:208                         | non pertinent |
| 4810 | Meissner et al.,   | 2013 | Anesthesiology. 2013; 119(4):941-953                                | non pertinent |
| 4811 | Meek et al.,       | 2013 | Eur J Clin Pharmacol. 2013; 69(3):365-371                           | non pertinent |
| 4812 | Mease et al.,      | 2013 | Therapeutic advances in musculoskeletal disease. 2013; 5(3):113-126 | non pertinent |
| 4813 | McNaughton et al., | 2013 | J Affect Disord. 2013; 148(1):104-111                               | non pertinent |
| 4814 | McKavanagh et al., | 2013 | International j of cardiovascular imaging. 2013; 29(7):1547-1555    | non pertinent |
| 4815 | McKavanagh et al., | 2013 | European heart j. 2013; 34:320-321                                  | non pertinent |

|      |                              |      |                                                                           |               |
|------|------------------------------|------|---------------------------------------------------------------------------|---------------|
| 4816 | McAlindon et al.,            | 2013 | Jama. 2013;<br>309(2):155-162                                             | non pertinent |
| 4817 | Matthey et al.,              | 2013 | Pain Physician.<br>2013; 16(5):E553-562                                   | non pertinent |
| 4818 | Martinez et al.,             | 2013 | Pain. 2013;<br>154(8):1197-1203                                           | non pertinent |
| 4819 | Martin et al.,               | 2013 | Arthritis research<br>& therapy. 2013;<br>15(5)                           | non pertinent |
| 4820 | Marsh et al.,                | 2013 | J Child Psychol<br>Psychiatry. 2013;<br>54(8):900-910                     | non pertinent |
| 4821 | Markenson et al.,            | 2013 | J of clinical<br>rheumatology.<br>2013; 19(6):317-323                     | non pertinent |
| 4822 | Marhofer et al.,             | 2013 | Br J Anaesth.<br>2013; 110(3):438-442                                     | non pertinent |
| 4823 | Mansson et al.,              | 2013 | Psychiatry<br>research –<br>neuroimaging.<br>2013; 214(3):229-237         | non pertinent |
| 4824 | Mansson et al.,              | 2013 | Biological<br>psychiatry. 2013;<br>73(9 SUPPL 1):72                       | non pertinent |
| 4825 | Mansson et al.,              | 2013 | Psychiatry Res.<br>2013; 214(3):229-237                                   | non pertinent |
| 4826 | Manor et al.,                | 2013 | European<br>psychiatry. 2013;<br>28(6):386-391                            | non pertinent |
| 4827 | Malinka et al.,              | 2013 | Clinical<br>transplantation.<br>2013; 27(5):E538-545                      | non pertinent |
| 4828 | Ly et al.,                   | 2013 | Pain. 2013;<br>154(10):2072-2077                                          | non pertinent |
| 4829 | Luo et al.,                  | 2013 | Human vaccines<br>&<br>immunotherapeut<br>ics. 2013;<br>9(8):1725-1734    | non pertinent |
| 4830 | Lueken et al.,               | 2013 | American j of<br>psychiatry. 2013;<br>170(11):1345-1355                   | non pertinent |
| 4831 | Lougee et al.,               | 2013 | J Bodyw Mov<br>Ther. 2013;<br>17(1):59-68                                 | non pertinent |
| 4832 | Lotsch et al.,               | 2013 | Naunyn-<br>schmiedeberg's<br>archives of<br>pharmacology.<br>2013; 386:48 | non pertinent |
| 4833 | Lopez-Castellanos<br>et al., | 2013 | Movement<br>disorders. 2013;<br>28:35-36                                  | non pertinent |
| 4834 | Loebermann et<br>al.,        | 2013 | PLoS One. 2013;<br>8(8)                                                   | non pertinent |

|      |                      |      |                                                                                          |               |
|------|----------------------|------|------------------------------------------------------------------------------------------|---------------|
| 4835 | Liu et al.,          | 2013 | Clinical orthopaedics and related research. 2013; 471(2):562-568                         | non pertinent |
| 4836 | Liu et al.,          | 2013 | CNS Drugs. 2013; 27(12):1093-1102                                                        | non pertinent |
| 4837 | Liu et al.,          | 2013 | Obesity (silver spring, md.). 2013; 21(10):1991-1996                                     | non pertinent |
| 4838 | Lind et al.,         | 2013 | Am J Sports Med. 2013; 41(12):2753-2758                                                  | non pertinent |
| 4839 | Lind et al.,         | 2013 | Arthroscopy – j of arthroscopic and related surgery. 2013; 29(10 SUPPL 1):e148           | non pertinent |
| 4840 | Liaw et al.,         | 2013 | International j of nursing studies. 2013; 50(7):883-894                                  | non pertinent |
| 4841 | Li et al.,           | 2013 | Chinese j of cancer research. 2013; 25(6):749-755                                        | non pertinent |
| 4842 | Li et al.,           | 2013 | J of the european academy of dermatology and venereology : JEADV. 2013; 28(12):1821-1826 | non pertinent |
| 4843 | Lev et al.,          | 2013 | Headache. 2013; 53(7):1054-1070                                                          | non pertinent |
| 4844 | Leknes et al.,       | 2013 | Pain. 2013; 154(3):402-410                                                               | non pertinent |
| 4845 | Lee et al.,          | 2013 | Pain medicine (Malden, Mass.). 2013; 14(1):5-13                                          | non pertinent |
| 4846 | Lee et al.,          | 2013 | Pain. 2013; 154(1):124-134                                                               | non pertinent |
| 4847 | Lee et al.,          | 2013 | Korean j of anesthesiology. 2013; 64(2):138-142                                          | non pertinent |
| 4848 | Lee et al.,          | 2013 | J of gastroenterology and hepatology (australia). 2013; 28(11):1699-1704                 | non pertinent |
| 4849 | Leblicq et al.,      | 2013 | Pediatr Blood Cancer. 2013; 60(5): 741-747                                               | non pertinent |
| 4850 | Le Graverand et al., | 2013 | Annals of the rheumatic diseases. 2013; 72(2):187-195                                    | non pertinent |
| 4851 | Lathrop et al.,      | 2013 | Contraception. 2013; 88(6):725-729                                                       | non pertinent |



|      |                        |      |                                                                   |               |
|------|------------------------|------|-------------------------------------------------------------------|---------------|
| 4852 | Langhorst et al,       | 2013 | Alimentary pharmacology & therapeutics. 2013; 38(5):490-500       | non pertinent |
| 4853 | Lang et al,            | 2013 | Clinical genitourinary cancer. 2013; 11(4):407-415                | non pertinent |
| 4854 | Lalezari et al,        | 2013 | Antiviral therapy. 2013; 18(6):755-764                            | non pertinent |
| 4855 | Labus et al,           | 2013 | Gastroenterology. 2013; 145(6):1253-1261.e1253                    | non pertinent |
| 4856 | Laaksonen et al,       | 2013 | Alcohol and alcoholism (oxford, oxfordshire). 2013; 48(6):687-693 | non pertinent |
| 4857 | Kullgren et al,        | 2013 | J of General Internal Medicine. 2013; 28:5-                       | non pertinent |
| 4858 | Kulkantrakorn et al,   | 2013 | Pain practice. 2013; 13(6):497-503                                | non pertinent |
| 4859 | Kuivalainen et al,     | 2013 | European j of pain (London, England). 2013; 17(9):1357-1364       | non pertinent |
| 4860 | Kristjansdottir et al, | 2013 | J Med Internet Res. 2013; 15(1):e5                                | non pertinent |
| 4861 | Krischak et al,        | 2013 | J of shoulder and elbow surgery. 2013; 22(9):1173-1179            | non pertinent |
| 4862 | Krein et al,           | 2013 | J of medical internet research. 2013; 15(8):e181                  | non pertinent |
| 4863 | Kostandy et al,        | 2013 | Neonatal Netw. 2013; 32(4):274-280                                | non pertinent |
| 4864 | Kortekaas et al,       | 2013 | PLoS One. 2013; 8(4):e61926                                       | non pertinent |
| 4865 | Kohn et al,            | 2013 | Am J Sports Med. 2013; 41(9):2128-2135                            | non pertinent |
| 4866 | Knolle et al,          | 2013 | Pain. 2013; 154(12):2729-2736                                     | non pertinent |
| 4867 | Knezveic et al,        | 2013 | Regional anesthesia and pain medicine. 2013; 38(1)                | non pertinent |
| 4868 | Klumpp et al,          | 2013 | Prog Neuropsychopharmacol Biol Psychiatry. 2013; 45:83-91         | non pertinent |
| 4869 | Kloppenburger          | 2013 | Annals of the rheumatic diseases. 2013; 72                        | non pertinent |

|      |                   |      |                                                                                 |               |
|------|-------------------|------|---------------------------------------------------------------------------------|---------------|
| 4870 | Klapwijk et al.,  | 2013 | Horm Behav.<br>2013; 64(2):314-322                                              | non pertinent |
| 4871 | Kircher et al.,   | 2013 | Biol Psychiatry.<br>2013; 73(1):93-101                                          | non pertinent |
| 4872 | King et al.,      | 2013 | Ergonomics. 2013;<br>56(1):59-68                                                | non pertinent |
| 4873 | Kim et al.,       | 2013 | International j of<br>medical sciences.<br>2013; 10(10):1327-1332               | non pertinent |
| 4874 | Kim et al.,       | 2013 | Clinical<br>therapeutics.<br>2013; 35(7):934-940                                | non pertinent |
| 4875 | Kim et al.,       | 2013 | Minerva<br>Anesthesiologica.<br>2013; 79(11):1248-1258                          | non pertinent |
| 4876 | Kim et al.,       | 2013 | Clinical<br>therapeutics.<br>2013; 35(9):1350-1360.e1351                        | non pertinent |
| 4877 | Kim et al.,       | 2013 | Clinical<br>therapeutics.<br>2013; 35(11):1734-1743                             | non pertinent |
| 4878 | Kim et al.,       | 2013 | Primary care<br>companion to the<br>j of clinical<br>psychiatry. 2013;<br>15(6) | non pertinent |
| 4879 | Kim et al.,       | 2013 | J of alternative<br>and<br>complementary<br>medicine. 2013;<br>19(7):A8         | non pertinent |
| 4880 | Kim et al.,       | 2013 | J Clin Anesth.<br>2013; 25(3):173-176                                           | non pertinent |
| 4881 | Kilinc et al.,    | 2013 | Annals of the<br>rheumatic<br>diseases. 2013; 72                                | non pertinent |
| 4882 | Kieninger et al., | 2013 | BMC infectious<br>diseases. 2013;<br>13(1)                                      | non pertinent |
| 4883 | Kerlan et al.,    | 2013 | Annales<br>d'endocrinologie.<br>2013; 74(5-6):487-490                           | non pertinent |
| 4884 | Kelly et al.,     | 2013 | J Am Coll Surg.<br>2013; 217(6):1080-1089                                       | non pertinent |
| 4885 | Kaur et al.,      | 2013 | J Behav Ther Exp<br>Psychiatry. 2013;<br>44(4):469-476                          | non pertinent |
| 4886 | Karolczak et al., | 2013 | Pharmacological<br>research. 2013;<br>74:7-22                                   | non pertinent |
| 4887 | Karadas et al.,   | 2013 | European<br>neurology. 2013;<br>70(1-2):95-101                                  | non pertinent |

|      |                            |      |                                                                             |               |
|------|----------------------------|------|-----------------------------------------------------------------------------|---------------|
| 4888 | Kaliomäki et al.,          | 2013 | European j of pain (London, England). 2013; 17(10):1465-1471                | non pertinent |
| 4889 | Jungquist et al.,          | 2013 | Sleep. 2013; 36:A266-267                                                    | non pertinent |
| 4890 | Jprn – Saori Nishio        | 2013 | UMIN-CTR Clinical Trial. 2013                                               | non pertinent |
| 4891 | Jprn – Chen-Ta Li          | 2013 | UMIN-CTR Clinical Trial. 2013                                               | non pertinent |
| 4892 | Jo et al.,                 | 2013 | American j of sports medicine. 2013; 41(10):2240-2248                       | non pertinent |
| 4893 | Jinzaki et al.,            | 2013 | International j of cardiovascular imaging. 2013; 29(1 SUPPL):7-20           | non pertinent |
| 4894 | Ji et al.,                 | 2013 | PLoS One. 2013; 8(2)                                                        | non pertinent |
| 4895 | Jeyamohan et al.,          | 2013 | Clinical neurosurgery. 2013; 60:172-173                                     | non pertinent |
| 4896 | Jetté et al.,              | 2013 | Neurorehabilitation and neural repair. 2013; 27(7):636-643                  | non pertinent |
| 4897 | Jensen et al.,             | 2013 | European j of contraception & reproductive health care. 2013; 18(4):274-283 | non pertinent |
| 4898 | Jelsness-Jørgensen et al., | 2013 | Scandinavian j of gastroenterology. 2013; 48(7):890-895                     | non pertinent |
| 4899 | Jayasudha                  | 2013 | Nurs J India. 2013; 104(1):10-13                                            | non pertinent |
| 4900 | Jarcho et al.,             | 2013 | Pain. 2013; 154(7):987-996                                                  | non pertinent |
| 4901 | Jacquet et al.,            | 2013 | JIAS – J of the international aids society. 2013                            | non pertinent |
| 4902 | Janssen et al.,            | 2013 | Vaccine. 2013; 31(46):5306-5313                                             | non pertinent |
| 4903 | Jakobsen et al.,           | 2013 | J of thoracic oncology. 2013; 8:390-391                                     | non pertinent |
| 4904 | Jacek et al.,              | 2013 | J of neuroimmunology . 2013; 255(1-2):85-91                                 | non pertinent |
| 4905 | Isserles et al.,           | 2013 | Brain Stimuli. 2013; 6(3):377-383                                           | non pertinent |
| 4906 | Isrctn – Ross              | 2013 | ISRCTN registry. 2013                                                       | non pertinent |
| 4907 | Isrctn – Fallon            | 2013 | ISRCTN registry. 2013                                                       | non pertinent |
| 4908 | Isrctn – Aeberli           | 2013 | ISRCTN registry. 2013                                                       | non pertinent |
| 4909 | Isrctn – Ryan              | 2013 | ISRCTN registry. 2013                                                       | non pertinent |

|      |                                    |      |                                                                 |               |
|------|------------------------------------|------|-----------------------------------------------------------------|---------------|
| 4910 | Isrctn – de Bruin                  | 2013 | ISRCTN registry. 2013                                           | non pertinent |
| 4911 | Ishii et al.,                      | 2013 | Brain Res. 2013; 1529-105-112                                   | non pertinent |
| 4912 | Irct201303221284<br>8N - Tahririan | 2013 | Iranian Registry of Clinical Trials. 2013                       | non pertinent |
| 4913 | Iorno et al.,                      | 2013 | Current medical research and opinion. 2013; 29(12):1685-1690    | non pertinent |
| 4914 | Incayawar                          | 2013 | J of pain. 2013; 14(4 SUPPL 1):103                              | non pertinent |
| 4915 | Imbimbo et al.,                    | 2013 | Alzheimer disease and associated disorders. 2013; 27(3):278-286 | non pertinent |
| 4916 | Hutson et al.,                     | 2013 | Lancet oncology. 2013; 14(13):1287-1294                         | non pertinent |
| 4917 | Hussey et al.,                     | 2013 | BMC pharmacology and toxicology. 2013; 14                       | non pertinent |
| 4018 | Huneke et al.,                     | 2013 | PLoS One. 2013; 8(10):e78278                                    | non pertinent |
| 4919 | Hughes et al.,                     | 2013 | Obesity (silver spring, md.). 2013; 21(9):1782-1788             | non pertinent |
| 4920 | Hughes et al.,                     | 2013 | Molecular genetics and metabolism. 2013; 109(3):269-275         | non pertinent |
| 4921 | Huber et al.,                      | 2013 | Pain. 2013; 154(9):1509-1518                                    | non pertinent |
| 4922 | Hougaard et al.,                   | 2013 | Scandinavian j of pain. 2013; 4(1):48-52                        | non pertinent |
| 4923 | Hostetler et al.,                  | 2013 | J Pharmacol Exp Ther. 2013; 347(2):478-486                      | non pertinent |
| 4924 | Hornboll et al.,                   | 2013 | J Psychopharmacol. 2013; 27(10):903-914                         | non pertinent |
| 4925 | Hooker et al.,                     | 2013 | Psychiatry Res. 2013; 213(2):99-107                             | non pertinent |
| 4926 | Honoris et al.,                    | 2013 | J of cardiovascular computed tomography. 2013; 7:89-90          | non pertinent |
| 4927 | Hong et al.,                       | 2013 | Clinical cancer research. 2013; 19(17):4824-4831                | non pertinent |
| 4928 | Hollander et al.,                  | 2013 | Diabetes care. 2013; 36(12):4022-4029                           | non pertinent |
| 4929 | Hoexter et al.,                    | 2013 | European neuropsychopharmacology. 2013; 23(7):569-580           | non pertinent |

|      |                             |      |                                                             |               |
|------|-----------------------------|------|-------------------------------------------------------------|---------------|
| 4930 | Hobl et al.,                | 2013 | Circulation. 2013; 128(22 SUPPL 1)                          | non pertinent |
| 4931 | Hillmen et al.,             | 2013 | British j of haematology. 2013; 162(1):62-73                | non pertinent |
| 4932 | Henry et al.,               | 2013 | Psychiatry research. 2013; 213(3):217-224                   | non pertinent |
| 4933 | Henningsson et al.,         | 2013 | European neuropsychopharmacology. 2013; 23:214-215          | non pertinent |
| 4934 | Hencel et al.,              | 2013 | Neuro Endocrinol Lett. 2013; 34(3):217-221                  | non pertinent |
| 4935 | Hemstreet et al.,           | 2013 | J of immunotherapy. 2013; 36(1):57-65                       | non pertinent |
| 4936 | Hellio le Graverand et al., | 2013 | Ann Rheum Dis. 2013; 72(2):187-195                          | non pertinent |
| 4937 | Hellio le Graverand et al., | 2013 | Semin Arthritis Rheum. 2013; 43(1):1-8                      | non pertinent |
| 4938 | He et al.,                  | 2013 | Eur Spine J. 2013; 22(10):2256-2263                         | non pertinent |
| 4939 | Hassan et al.,              | 2013 | Medical forum monthly. 2013; 24(4):66-69                    | non pertinent |
| 4940 | Hart et al.,                | 2013 | Arch Orthop Trauma Surg. 2013; 133(9):1295-1301             | non pertinent |
| 4941 | Harrison et al.,            | 2013 | British j of haematology. 2013; 162(2):229-239              | non pertinent |
| 4942 | Harris et al.,              | 2013 | Anesthesiology. 2013; 119(6):1453-1464                      | non pertinent |
| 4943 | Hao et al.,                 | 2013 | J of thoracic oncology. 2013; 8:48-49                       | non pertinent |
| 4944 | Han et al.,                 | 2013 | European j of endocrinology. 2013; 168(6):887-893           | non pertinent |
| 4945 | Han et al.,                 | 2013 | Human vaccines and immunotherapeutics. 2013; 9(9):1971-1977 | non pertinent |
| 4946 | Haefeli et al.,             | 2013 | J Clin Neurophysiol. 2013; 30(3):291-298                    | non pertinent |
| 4947 | Haddad et al.,              | 2013 | Contraception. 2013; 88(6):737-743                          | non pertinent |
| 4948 | Haaker et al.,              | 2013 | Proc Natl Acad Sci U S A. 2013; 110(26):E2428-2436          | non pertinent |

|      |                    |      |                                                                              |               |
|------|--------------------|------|------------------------------------------------------------------------------|---------------|
| 4949 | Gupta et al.,      | 2013 | J of neurosurgical anesthesiology. 2013; 25(3):271-278                       | non pertinent |
| 4950 | Guereca et al.,    | 2013 | J of pain. 2013; 14(4 SUPPL 1):47                                            | non pertinent |
| 4951 | Guedj et al.,      | 2013 | European j of nuclear medicine and molecular imaging. 2013; 40:217           | non pertinent |
| 4952 | Guarany et al.,    | 2013 | PLoS One. 2013; 8(2)                                                         | non pertinent |
| 4953 | Greif et al.,      | 2013 | Heart (British Cardiac Society). 2013; 99(14):1004-1011                      | non pertinent |
| 4954 | Graudins et al.,   | 2013 | Trials. 2013; 14(1)                                                          | non pertinent |
| 4955 | Grahn et al.,      | 2013 | J of neurology. 2013; 260(7):1813-1821                                       | non pertinent |
| 4956 | Grady et al.,      | 2013 | Eur Neuropsychopharmacol. 2013; 23(5):368-378                                | non pertinent |
| 4957 | Gould et al.,      | 2013 | Regulatory toxicology and pharmacology : RTP. 2013; 67(1):89-97              | non pertinent |
| 4958 | Gorka et al.,      | 2013 | Psychopharmacology. 2013; 229(1):141-154                                     | non pertinent |
| 4959 | Gontero et al.,    | 2013 | Urologic oncology: seminars and original investigations. 2013; 31(5):671-675 | non pertinent |
| 4960 | Gong et al.,       | 2013 | J of arthroplasty. 2013; 28(8):1301-1305                                     | non pertinent |
| 4961 | Gobert et al.,     | 2013 | Regional anesthesia and pain medicine. 2013; 38(5 SUPPL 1):E122              | non pertinent |
| 4962 | Gitelman et al.,   | 2013 | The lancet. Diabetes & endocrinology. 2013; 1(4):306-316                     | non pertinent |
| 4963 | Giorgi et al.,     | 2013 | Clinical therapeutics. 2013; 35(9):1321-1336                                 | non pertinent |
| 4964 | Gilron et al.,     | 2013 | Clin J Pain. 2013; 29(2):124-131                                             | non pertinent |
| 4965 | Gigante et al.,    | 2013 | Helicobacter. 2013; 18:134                                                   | non pertinent |
| 4966 | Ghanizadeh et al., | 2013 | Depression and anxiety. 2013; 30(11):1084-1088                               | non pertinent |

|      |                      |      |                                                                                                                                                               |               |
|------|----------------------|------|---------------------------------------------------------------------------------------------------------------------------------------------------------------|---------------|
| 4967 | Geuter et al.,       | 2013 | Neuroimage. 2013; 67:227-236                                                                                                                                  | non pertinent |
| 4968 | Genovese et al.,     | 2013 | J of endocrinological investigation. 2013; 36(8):606-616                                                                                                      | non pertinent |
| 4969 | Geiger et al.,       | 2013 | J of therapeutic ultrasound. Conference: 2nd european symposium on focused ultrasound therapy. Italy. Conference start: 20131010. Conference end: 20131011; 2 | non pertinent |
| 4970 | Gammaitoni et al.,   | 2013 | J of pain research. 2013; 6:565-570                                                                                                                           | non pertinent |
| 4971 | Galea et al.,        | 2013 | J of neuroscience. 2013; 33(9):3981-3988                                                                                                                      | non pertinent |
| 4972 | Furl et al.,         | 2013 | J Neurosci. 2013; 33(44):17435-17443                                                                                                                          | non pertinent |
| 4973 | French et al.,       | 2013 | PLoS One. 2013; 8(6):e65471                                                                                                                                   | non pertinent |
| 4974 | Freman et al.,       | 2013 | Spine. 2013; 38(23):1986-1994                                                                                                                                 | non pertinent |
| 4975 | Fountain et al.,     | 2013 | Epilepsia. 2013; 54(1):58-65                                                                                                                                  | non pertinent |
| 4976 | Fortin et al.,       | 2013 | Phys Ther. 2013; 93(11):1540-1550                                                                                                                             | non pertinent |
| 4977 | Forkmann et al.,     | 2013 | J Neurosci. 2013; 33(6):2571-2581                                                                                                                             | non pertinent |
| 4978 | Fonseca et al.,      | 2013 | Case reports in oncology. 2013; 6(2):441-449                                                                                                                  | non pertinent |
| 4979 | Fisher et al.,       | 2013 | European neuropsychopharmacology. 2013; 23:272-273                                                                                                            | non pertinent |
| 4980 | Fisher et al.,       | 2013 | Biological psychiatry. 2013; 73(9 SUPPL 1):104                                                                                                                | non pertinent |
| 4981 | Fischer et al.,      | 2013 | Pain medicine (Malden, Mass.). 2013; 14(9):1388-1399                                                                                                          | non pertinent |
| 4982 | Finocchietti et al., | 2013 | Med Biol Eng Comput. 2013; 51(1-2):113-122                                                                                                                    | non pertinent |
| 4983 | Findling et al.,     | 2013 | J of child and adolescent psychopharmacology. 2013; 23(7):468-480                                                                                             | non pertinent |

|      |                    |      |                                                                   |               |
|------|--------------------|------|-------------------------------------------------------------------|---------------|
| 4984 | Findling et al.,   | 2013 | J of child and adolescent psychopharmacology. 2013; 23(1):11-21   | non pertinent |
| 4985 | Findling et al.,   | 2013 | J of child and adolescent psychopharmacology. 2013; 23(8):545-557 | non pertinent |
| 4986 | Felson et al.,     | 2013 | Arthritis and rheumatism. 2013; 65:717                            | non pertinent |
| 4987 | Felmingham et al., | 2013 | Biol Psychiatry. 2013; 73(11):1059-1063                           | non pertinent |
| 4988 | Fardo et al.,      | 2013 | PLoS One. 2013; 8(11):e81964                                      | non pertinent |
| 4989 | Fallah et al.,     | 2013 | Indian Pediatr. 2013; 50(2):233-235                               | non pertinent |
| 4990 | Euctr, N.L.        | 2013 | EU Clinical Trials Register. 2013                                 | non pertinent |
| 4991 | Euctr, G.B.        | 2013 | EU Clinical Trials Register. 2013                                 | non pertinent |
| 4992 | Euctr, E.S.        | 2013 | EU Clinical Trials Register. 2013                                 | non pertinent |
| 4993 | Euctr, E.S.        | 2013 | EU Clinical Trials Register. 2013                                 | non pertinent |
| 4994 | Euctr, D.K.        | 2013 | EU Clinical Trials Register. 2013                                 | non pertinent |
| 4995 | Euctr, D.E.        | 2013 | EU Clinical Trials Register. 2013                                 | non pertinent |
| 4996 | Euctr, D.E.        | 2013 | EU Clinical Trials Register. 2013                                 | non pertinent |
| 4997 | Ellingsen et al.,  | 2013 | Proc Natl Acad Sci U S A. 2013; 110(44):17993-17998               | non pertinent |
| 4998 | Elimian et al.,    | 2013 | Prenatal diagnosis. 2013; 33(12):1158-1161                        | non pertinent |
| 4999 | Eberl et al.,      | 2013 | BMC gastroenterology. 2013; 13:176                                | non pertinent |
| 5000 | Dy et al.,         | 2013 | Investigational new drugs. 2013; 31(4):891-899                    | non pertinent |
| 5001 | Dubois et al.,     | 2013 | Clinical J of Pain. 2013; 29(8):696-701                           | non pertinent |
| 5002 | Dryer et al.,      | 2013 | Spine j. 2013; 13(9):30-                                          | non pertinent |
| 5003 | Dreyer et al.,     | 2013 | J of clinical investigation. 2013; 123(11):4654-4666              | non pertinent |
| 5004 | Doukky et al.,     | 2013 | International j of cardiovascular imaging. 2013; 29(5):1029-1037  | non pertinent |



|      |                       |      |                                                                        |               |
|------|-----------------------|------|------------------------------------------------------------------------|---------------|
| 5005 | Dmitrovic et al.,     | 2013 | Human reproduction (Oxford, England). 2013; 28(11):2958-2965           | non pertinent |
| 5006 | Dittmann et al.,      | 2013 | CNS Drugs. 2013; 27(12):1081-1092                                      | non pertinent |
| 5007 | Dinning et al.,       | 2013 | Gastroenterology. 2013; 144(5):61-                                     | non pertinent |
| 5008 | Diler et al.,         | 2013 | Psychiatry Res. 2013; 214(3):277-284                                   | non pertinent |
| 5009 | Diers et al.,         | 2013 | Schmerz (berlin, germany). 2013; 27(2):205-211                         | non pertinent |
| 5010 | Diemer et al.,        | 2013 | European neuropsychopharmacology. 2013; 23(11):1551-1560               | non pertinent |
| 5011 | Di Minno et al.,      | 2013 | Experimental and clinical endocrinology & diabetes. 2013; 121(2):91-93 | non pertinent |
| 5012 | Dhillon               | 2013 | Biodrugs. 2013; 27(4):375-392                                          | non pertinent |
| 5013 | Desai et al.,         | 2013 | Thrombosis research. 2013; 132(3):341-345                              | non pertinent |
| 5014 | Derakhshanfar et al., | 2013 | Acta medica Croatica. 2013; 67(5):401-405                              | non pertinent |
| 5015 | De Souza et al.,      | 2013 | Medical science monitor. 2013; 19:716-722                              | non pertinent |
| 5016 | De Ridder et al.,     | 2013 | World Neurosurg. 2013; 80(5):642-649.e641                              | non pertinent |
| 5017 | De Rezende et al.,    | 2013 | J of psychopharmacology (Oxford, England). 2013; 27(12):1124-1133      | non pertinent |
| 5018 | Davies et al.,        | 2013 | Diabetes care. 2013; 36(5):1368-1376                                   | non pertinent |
| 5019 | Dangers et al.,       | 2013 | European respiratory j. 2013; 42                                       | non pertinent |
| 5020 | Dahan et al.,         | 2013 | Molecular medicine (Cambridge, Mass.). 2013; 19:334-345                | non pertinent |
| 5021 | Cunningham et al.,    | 2013 | J of cell communication and signaling. 2013; 7(1):76-                  | non pertinent |
| 5022 | Cui et al.,           | 2013 | Molecular therapy. 2013; 21(7):1456-1463                               | non pertinent |

|      |                          |      |                                                                    |               |
|------|--------------------------|------|--------------------------------------------------------------------|---------------|
| 5023 | Creech et al.,           | 2013 | Human vaccines & immunotherapeutics. 2013; 9(12):2548-2557         | non pertinent |
| 5024 | Cote et al.,             | 2013 | Sleep. 2013; 36:A97                                                | non pertinent |
| 5025 | Corsetti et al.,         | 2013 | Neurogastroenterology and motility. 2013; 25(4):e256-262           | non pertinent |
| 5026 | Corr et al.,             | 2013 | Psychopharmacology. 2013; 225(2):373-379                           | non pertinent |
| 5027 | Cognetti et al.,         | 2013 | Cancer research. 2013; 73(24 SUPPL 1)                              | non pertinent |
| 5028 | Coghill et al.,          | 2013 | European neuropsychopharmacology. 2013; 23(10):1208-1218           | non pertinent |
| 5029 | Clauw et al.,            | 2013 | Arthritis research & therapy. 2013; 15(4):R88                      | non pertinent |
| 5030 | Chiauzzi et al.,         | 2013 | J of pain. 2013; 14(4 SUPPL 1):94                                  | non pertinent |
| 5031 | Chi et al.,              | 2013 | Chinese medical j. 2013; 126(9):1642-1646                          | non pertinent |
| 5032 | Chi - Huang              | 2013 | Chinese Clinical Trial Registry. 2013                              | non pertinent |
| 5033 | Cheng et al.,            | 2013 | Vaccine. 2013; 31(20):2471-2476                                    | non pertinent |
| 5034 | Chaumeron et al.,        | 2013 | Clinical orthopaedics and related research. 2013; 471(7):2284-2295 | non pertinent |
| 5035 | Chase et al.,            | 2013 | Spinal Cord. 2013; 51(11):847-851                                  | non pertinent |
| 5036 | Chadha et al.,           | 2013 | JAMA otolaryngology – head & neck surgery. 2013; 139(12):1301-1305 | non pertinent |
| 5037 | Catanzaro et al.,        | 2013 | Acta bio-medica. 2013; 84(1):30-37                                 | non pertinent |
| 5038 | Casanueva et al.,        | 2013 | Rheumatology international. 2013; 33(10):2665-2670                 | non pertinent |
| 5039 | Carre et al.,            | 2013 | Soc Cogn Affect Neurosci. 2013; 8(2):224-229                       | non pertinent |
| 5040 | Carlorazo Rustia et al., | 2013 | J of gastroenterology and hepatology. 2013; 28:211-                | non pertinent |
| 5041 | Cariou et al.,           | 2013 | Diabetes care. 2013; 36(10):2923-2930                              | non pertinent |

|      |                         |      |                                                                       |               |
|------|-------------------------|------|-----------------------------------------------------------------------|---------------|
| 5042 | Candido et al.,         | 2013 | Pain Physician.<br>2013; 16(5):497-511                                | non pertinent |
| 5043 | Camprubi-Robles et al., | 2013 | J of neuroscience.<br>2013; 33(6):2582-2592                           | non pertinent |
| 5044 | Caliskan et al.,        | 2013 | BMC<br>anesthesiology.<br>2013; 13                                    | non pertinent |
| 5045 | Cahn et al.,            | 2013 | BMC<br>pharmacology and toxicology. 2013; 14                          | non pertinent |
| 5046 | Busch et al.,           | 2013 | Brain Stimul.<br>2013; 6(2):202-209                                   | non pertinent |
| 5047 | Bundred et al.,         | 2013 | Investigational<br>new drugs. 2013; 31(4):949-958                     | non pertinent |
| 5048 | Bryan et al.,           | 2013 | Int J Behav Nutr<br>Phys Act. 2013; 10:139                            | non pertinent |
| 5049 | Bruhn et al.,           | 2013 | BMJ Open. 2013; 3(4)                                                  | non pertinent |
| 5050 | Brown et al.,           | 2013 | Clinical J of Pain.<br>2013; 29(3):233-244                            | non pertinent |
| 5051 | Briasoulis et al.,      | 2013 | BMC Cancer.<br>2013; 13:263                                           | non pertinent |
| 5052 | Boyce et al.,           | 2013 | British j of clinical<br>pharmacology.<br>2013; 76(5):689-698         | non pertinent |
| 5053 | Boxer et al.,           | 2013 | JACC. Heart<br>failure. 2013; 1(1):84-90                              | non pertinent |
| 5054 | Bossong et al.,         | 2013 | Eur<br>Neuropsychophar<br>macol. 2013; 23(12):1687-1697               | non pertinent |
| 5055 | Bos et al.,             | 2013 | Psychoneuroendo<br>crinology. 2013; 38(6):808-817                     | non pertinent |
| 5056 | Borja-Tabora et al.,    | 2013 | BMC infectious<br>diseases. 2013; 13(1)                               | non pertinent |
| 5057 | Borgwardt et al.,       | 2013 | J of inherited<br>metabolic disease.<br>2013; 36(6):1015-1024         | non pertinent |
| 5058 | Borggraefe et al.,      | 2013 | European j of<br>paediatric<br>neurology: EJPN                        | non pertinent |
| 5059 | Borckardt et al.,       | 2013 | Clinical J of Pain.<br>2013; 29(11):925-928                           | non pertinent |
| 5060 | Boostani et al.,        | 2013 | Iranian j of basic<br>medical sciences.<br>2013; 16(3):213-216        | non pertinent |
| 5061 | Bone et al.,            | 2013 | J of clinical<br>endocrinology and metabolism. 2013; 98(12):4691-4701 | non pertinent |

|      |                  |      |                                                                                 |               |
|------|------------------|------|---------------------------------------------------------------------------------|---------------|
| 5062 | Boll et al.,     | 2013 | J of clinical oncology. 2013; 31(12):1522-1529                                  | non pertinent |
| 5063 | Boiko et al.,    | 2013 | Cornea. 2013; 32(10):1349-1353                                                  | non pertinent |
| 5064 | Block et al.,    | 2013 | Nephron. Clinical practice. 2013; 123(1-2):93-101                               | non pertinent |
| 5065 | Blickman et al., | 2013 | Pediatric radiology. 2013; 43:573-574                                           | non pertinent |
| 5066 | Blasiak et al.,  | 2013 | JAMA dermatology. 2013; 149(12):1392-1398                                       | non pertinent |
| 5067 | Blacker et al.,  | 2013 | Stroke research and treatment. 2013                                             | non pertinent |
| 5068 | Biondi et al.,   | 2013 | Pain Physician. 2013; 16(3):E237-246                                            | non pertinent |
| 5069 | Bianchi et al.,  | 2013 | The lancet. Respiratory medicine. 2013;1(5):377-385                             | non pertinent |
| 5070 | Bhatt et al.,    | 2013 | Stroke. 2013; 44(12):e227                                                       | non pertinent |
| 5071 | Bethell et al.,  | 2013 | PLoS One. 2013; 8(3)                                                            | non pertinent |
| 5072 | Bérczi           | 2013 | Cardiovascular and interventional radiology. 2013; 36:182-183                   | non pertinent |
| 5073 | Benson et al.,   | 2013 | Brain, behavior, and immunity. 2013; 32:e17                                     | non pertinent |
| 5074 | Bembich et al.,  | 2013 | Neonatology. 2013; 104(4):255-259                                               | non pertinent |
| 5075 | Belczak et al.,  | 2013 | Phlebology / venous forum of the royal society of medicine. 2013; 29(7):454-460 | non pertinent |
| 5076 | Becerra et al.,  | 2013 | J of pharmacology and experimental therapeutics. 2013; 345(1):41-51             | non pertinent |
| 5077 | Bays et al.,     | 2013 | American j of cardiology. 2013; 112(12):1885-1895                               | non pertinent |
| 5078 | Baudic et al.,   | 2013 | J Psychiatr Res. 2013; 47(1):72-77                                              | non pertinent |
| 5079 | Bateman et al.,  | 2013 | J of pain research. 2013; 6:311-318                                             | non pertinent |
| 5080 | Bareille et al., | 2013 | Current drug therapy. 2013; 8(2):69-75                                          | non pertinent |

|      |                        |      |                                                                                          |               |
|------|------------------------|------|------------------------------------------------------------------------------------------|---------------|
| 5081 | Aziznejad et al.,      | 2013 | J of babol university of medical sciences. 2013; 15(3):16-23                             | non pertinent |
| 5082 | Ascher et al.,         | 2013 | J of the european academy of dermatology and venereology : JEADV. 2013; 28(12):1707-1715 | non pertinent |
| 5083 | Arts et al.,           | 2013 | BMC musculoskeletal disorders. 2013; 14:244                                              | non pertinent |
| 5084 | Armstrong et al.,      | 2013 | Clinical cancer research. 2013; 19(24):6891-6901                                         | non pertinent |
| 5085 | Ansaldi et al.,        | 2013 | Human vaccines & immunotherapeutics. 2013; 9(3):591-598                                  | non pertinent |
| 5086 | Ang et al.,            | 2013 | Clinical J of Pain. 2013; 29(9):747-754                                                  | non pertinent |
| 5087 | Anandakrishnan et al., | 2013 | J canadien d'anesthesie (Canadian j of anaesthesia.). 2013; 60(11):1054-1060             | non pertinent |
| 5088 | Amin et al.,           | 2013 | Egyptian j of chest diseases and tuberculosis. 2013; 62(3):447-451                       | non pertinent |
| 5089 | Amadori et al.,        | 2013 | The lancet. Oncology. 2013; 14(7):663-670                                                | non pertinent |
| 5090 | Allen et al.,          | 2013 | Health technology assessment. 2013; 17(57):1-139                                         | non pertinent |
| 5091 | Allais et al.,         | 2013 | Neurological sciences. 2013; 34(SUPPL 1):83-86                                           | non pertinent |
| 5092 | Alaie et al.,          | 2013 | Biological psychiatry. 2013; 73(9 SUPPL 1): 79                                           | non pertinent |
| 5093 | Al-Aqil et al.,        | 2013 | Poultry science. 2013; 92(1):33-40                                                       | non pertinent |
| 5094 | Ahmed Ali et al.,      | 2013 | BMC gastroenterology. 2013; 13:49                                                        | non pertinent |
| 5095 | Afilalo et al.,        | 2013 | Pain Physician. 2013; 16(1):27-40                                                        | non pertinent |
| 5096 | Adler et al.,          | 2013 | PLoS One. 2013; 8(9)                                                                     | non pertinent |
| 5096 | Actrn - Yang           | 2013 | Australian New Zealand Clinical Trials Registry. 2013                                    | non pertinent |
| 5098 | Ab Rashid et al.,      | 2013 | Urology. 2013; 82(3):194-                                                                | non pertinent |

|      |                                  |      |                                                                                                                      |               |
|------|----------------------------------|------|----------------------------------------------------------------------------------------------------------------------|---------------|
| 5099 | American College of Rheumatology | 2013 | Arthritis and rheumatism. 2013; 65(SUPPL 10):376-377                                                                 | non pertinent |
| 5100 | Westin et al.,                   | 2013 | International j of biological markers. 2013; 28(3):233-241                                                           | non pertinent |
| 5101 | Karsdal et al.,                  | 2013 | Annals of the rheumatic diseases. 2013; 72(SUPPL 3)                                                                  | non pertinent |
| 5102 | ?                                | 2013 | Annals of the academy of medicine singapore. 2013; 42:1-                                                             | non pertinent |
| 5103 | Zhang et al.,                    | 2012 | Evidence-based complementary and alternative medicine. 2012                                                          | non pertinent |
| 5104 | Zhang et al.,                    | 2012 | J Nucl Med. 2012; 53(10):1573-1578                                                                                   | non pertinent |
| 5105 | Zhang et al.,                    | 2012 | Dissertation for doctoral degree of southern medical university (nanfang yike daxue boshi xuewei lunwen). 2012; i-vi | non pertinent |
| 5106 | Zhang et al.,                    | 2012 | Research in developmental disabilities. 2012; 33(4):1136-1146                                                        | non pertinent |
| 5107 | Zhang et al.,                    | 2012 | Acta oto-laryngologica. 2012; 132(6):583-589                                                                         | non pertinent |
| 5108 | Zarraga et al.,                  | 2012 | Circulation: arrhythmia and electrophysiology. 2012; 5(4):739-747                                                    | non pertinent |
| 5109 | Yoshimura et al.,                | 2012 | Experimental and therapeutic medicine. 2012; 3(3):457-462                                                            | non pertinent |
| 5110 | Yoon et al.,                     | 2012 | J of diabetes investigation. 2012; 3(3):309-317                                                                      | non pertinent |
| 5111 | Yoon et al.,                     | 2012 | J Neurosurg Anesthesiology. 2012; 24(2):146-151                                                                      | non pertinent |
| 5112 | Yang et al.,                     | 2012 | J of xi'an jiaotong university (medical sciences). 2012; 33(4):494-497                                               | non pertinent |
| 5113 | Yang et al.,                     | 2012 | BMC Complement Altern Med. 2012;                                                                                     | non pertinent |

|      |                          |      |                                                                    |               |
|------|--------------------------|------|--------------------------------------------------------------------|---------------|
| 5114 | Williams et al.,         | 2012 | Neuropsychopharmacology. 2012; 38:301-302                          | non pertinent |
| 5115 | Williams et al.,         | 2012 | J of clinical psychiatry. 2012; 73(5):654-660                      | non pertinent |
| 5116 | Wieser et al.,           | 2012 | Biol Psychol. 2012; 90(3):242-248                                  | non pertinent |
| 5117 | Wibral et al.,           | 2012 | PLoS One. 2012; 7(10)                                              | non pertinent |
| 5118 | West et al.,             | 2012 | J of oral and maxillofacial surgery. 2012; 70(9 SUPPL 2):e109-e110 | non pertinent |
| 5119 | Weininger et al.,        | 2012 | European j of radiology. 2012; 81(12):3703-3710                    | non pertinent |
| 5120 | Volz et al.,             | 2012 | PLoS One. 2012; 7(3):e34273                                        | non pertinent |
| 5121 | Volkman et al.,          | 2012 | The lancet. Neurology. 2012; 11(12):1029-1038                      | non pertinent |
| 5122 | Vissers                  | 2012 | Regional anesthesia and pain medicine. 2012; 37(5):E70-E72         | non pertinent |
| 5123 | Vesikari et al.,         | 2012 | Human vaccines and immunotherapeutics. 2012; 8(9):1283-1292        | non pertinent |
| 5124 | Vesikari et al.,         | 2012 | Human vaccines and immunotherapeutics. 2012; 8(12):1882-1891       | non pertinent |
| 5125 | Versmessen et al.,       | 2012 | BMC Cancer. 2012; 12:495                                           | non pertinent |
| 5126 | Verbeek et al.,          | 2012 | BMC Musculoskeletal Disord. 2012; 13:16                            | non pertinent |
| 5127 | Vazquez-Roque et al.,    | 2012 | Gastroenterology. 2012; 142(5 SUPPL 1):132-133                     | non pertinent |
| 5128 | Vasilakis et al.,        | 2012 | Orthopedics. 2012; 35(12):e1684-1691                               | non pertinent |
| 5129 | Vanelderden et al.,      | 2012 | Regional anesthesia and pain medicine. 2012; 37(5):E98-E101        | non pertinent |
| 5130 | Van Nieuwenhoven et al., | 2012 | Eur J Gastroenterol Hepatol. 2012; 24(11):1259-1265                | non pertinent |
| 5131 | Upadhyay et al.,         | 2012 | Neuroimage. 2012; 59(4):3762-3773                                  | non pertinent |

|      |                     |      |                                                                                   |               |
|------|---------------------|------|-----------------------------------------------------------------------------------|---------------|
| 5132 | Ueberall et al.,    | 2012 | Pain practice. 2012; 12:80                                                        | non pertinent |
| 5133 | Ueberall et al.,    | 2012 | Current medical research and opinion. 2012; 28(10):1617-1634                      | non pertinent |
| 5134 | Tucker et al.,      | 2012 | Gut. 2012; 61:A316                                                                | non pertinent |
| 5135 | Tousignant et al.,  | 2012 | Disabil Rehabil. 2012; 34(3):196-201                                              | non pertinent |
| 5136 | Torkildsen et al.,  | 2012 | Archives of neurology. 2012; 69(8):1044-1051                                      | non pertinent |
| 5137 | Tobinick et al.,    | 2012 | CNS Drugs. 2012; 26(12):1051-1070                                                 | non pertinent |
| 5138 | Tillisch et al.,    | 2012 | Aliment Pharmacol Ther. 2012; 35(3):360-367                                       | non pertinent |
| 5139 | Thanh et al.,       | 2012 | Malaria j. 2012; 11                                                               | non pertinent |
| 5140 | Taylor et al.,      | 2012 | Pain. 2012; 153(6):1219-1225                                                      | non pertinent |
| 5141 | Tassorelli et al.,  | 2012 | Neurorehabilitation and neural repair. 2012; 26(6):669                            | non pertinent |
| 5142 | Tao et al.,         | 2012 | American j of psychiatry. 2012; 169(4):381-388                                    | non pertinent |
| 5143 | Tang et al.,        | 2012 | Clinical rheumatology. 2012; 31(7):1079-1086                                      | non pertinent |
| 5144 | Tahtinen et al.,    | 2012 | Pediatric infectious disease j. 2012; 31(12):1227-1232                            | non pertinent |
| 5145 | Suzuki et al.,      | 2012 | Therapeutic advances in psychopharmacology. 2012; 2(6):227-234                    | non pertinent |
| 5146 | Strosberg et al.,   | 2012 | Annals of oncology. 2012; 23(9):2335-2341                                         | non pertinent |
| 5147 | Strawn et al.,      | 2012 | J of the American Academy of Child and Adolescent Psychiatry. 2012; 51(6):642-651 | non pertinent |
| 5148 | Stoppe et al.,      | 2012 | Br J Anaesth. 2012; 108(1):80-88                                                  | non pertinent |
| 5149 | Stacchiotti et al., | 2012 | J Clin Oncol. 2012; 30(9):914-920                                                 | non pertinent |
| 5150 | Spitz et al.,       | 2012 | Prostate cancer and prostatic disease. 2012; 15(1):93-99                          | non pertinent |
| 5151 | Soravia et al.,     | 2012 | Clinical EEG and neuroscience. 2012; 43(1):80                                     | non pertinent |



|      |                     |      |                                                                   |               |
|------|---------------------|------|-------------------------------------------------------------------|---------------|
| 5152 | Smith et al.,       | 2012 | Soc Cogn Affect Neurosci. 2012; 7(7):831-840                      | non pertinent |
| 5153 | Skogseid et al.,    | 2012 | Eur J Neurol. 2012; 19(4):610-615                                 | non pertinent |
| 5154 | Sinha et al.,       | 2012 | Anesth Analg. 2012; 115(1):202-206                                | non pertinent |
| 5155 | Siepe et al.,       | 2012 | Eur Spine J. 2012; 21(11):2287-2299                               | non pertinent |
| 5156 | Sibunruang et al.,  | 2012 | Clinical microbiology and infection. 2012; 18:238-239             | non pertinent |
| 5157 | Shin et al.,        | 2012 | Arthroscopy. 2012; 28(5):628-635                                  | non pertinent |
| 5158 | Shigihara et al.,   | 2012 | Brain Res. 2012; 1457:44-50                                       | non pertinent |
| 5159 | Sheaves et al.,     | 2012 | J of orthopaedic and sports physical therapy. 2012; 42(2):114-124 | non pertinent |
| 5160 | Sharpe et al.,      | 2012 | Psychother Psychosom. 2012; 81(3):145-152                         | non pertinent |
| 5161 | Shamim et al.,      | 2012 | J of the pakistan medical association. 2012; 62(8):561-565        | non pertinent |
| 5162 | Seymour et al.,     | 2012 | J of neuroscience. 2012; 32(17):5833-5842                         | non pertinent |
| 5163 | Seo et al.,         | 2012 | PLoS One. 2012; 7(6):e37808                                       | non pertinent |
| 5164 | Selvan et al.,      | 2012 | The scientific world j. 2012                                      | non pertinent |
| 5165 | Selker et al.,      | 2012 | American heart j. 2012; 163(3):315-322                            | non pertinent |
| 5166 | Schuurman et al.,   | 2012 | Stereotactic and functional neurosurgery. 2012; 90:47-            | non pertinent |
| 5167 | Schutz et al.,      | 2012 | BMC Med. 2012; 10:78                                              | non pertinent |
| 5168 | Schmitz et al.,     | 2012 | Frontiers in Psychiatry. 2012; 3(AUG)                             | non pertinent |
| 5169 | Schabrun et al.,    | 2012 | PLoS One. 2012; 7(12):e51298                                      | non pertinent |
| 5170 | Sardar et al.,      | 2012 | Spine j. 2012; 12(9 SUPPL 1):152                                  | non pertinent |
| 5171 | Sala-Blanch et al., | 2012 | Anesthesia and Analgesia. 2012; 114(5):1121-1127                  | non pertinent |
| 5172 | Rowbotham et al.,   | 2012 | Pain. 2012; 153(4):862-868                                        | non pertinent |
| 5173 | Rousseau et al.,    | 2012 | Annals of oncology. 2012; 23(2):450-457                           | non pertinent |

|      |                       |      |                                                             |               |
|------|-----------------------|------|-------------------------------------------------------------|---------------|
| 5174 | Rousseau et al.,      | 2012 | Paediatr Anaesth. 2012; 22(8):799-804                       | non pertinent |
| 5175 | Roomer et al.,        | 2012 | Antiviral therapy. 2012; 17(3):509-517                      | non pertinent |
| 5176 | Roderick et al.,      | 2012 | Rheumatology (united kingdom). 2012; 51:viii11-             | non pertinent |
| 5177 | River et al.,         | 2012 | Clin J Pain. 2012; 28(9):790-796                            | non pertinent |
| 5178 | Ridker et al.,        | 2012 | Circulation. 2012; 126(23):2739-2748                        | non pertinent |
| 5179 | Ren et al.,           | 2012 | Chin Med J (Engl). 2012; 125(9):1627-1632                   | non pertinent |
| 5180 | Reidler et al.,       | 2012 | J of Pain. 2012; 13(5):450-458                              | non pertinent |
| 5181 | Reardon et al.,       | 2012 | Cancer chemotherapy and pharmacology. 2012; 69(4):849-860   | non pertinent |
| 5182 | Railhac et al.,       | 2012 | Clinical rheumatology. 2012; 31(9):1347-1357                | non pertinent |
| 5183 | Rabinak et al.,       | 2012 | Biological psychiatry. 2012; 71(8 SUPPL 1):177              | non pertinent |
| 5184 | Rabinak et al.,       | 2012 | Neuropsychopharmacology. 2012; 38:287                       | non pertinent |
| 5185 | Quintard et al.,      | 2012 | Annals of intensive care. 2012; 2(1)                        | non pertinent |
| 5186 | Qin et al.,           | 2012 | J Neurosci. 2012; 32(12):4032-4041                          | non pertinent |
| 5187 | Poole et al.,         | 2012 | Arthritis and rheumatism. 2012; 64:1111-                    | non pertinent |
| 5188 | Plumhans et al.,      | 2012 | J Med Imaging Radiat Oncol. 2012; 56(5):532-537             | non pertinent |
| 5189 | Pishvaian et al.,     | 2012 | Cancer chemotherapy and pharmacology. 2012; 70(6):843-853   | non pertinent |
| 5190 | Pfenningsdorf et al., | 2012 | Clinical ophthalmology (auckland, N.Z.). 2012; 6(1):739-746 | non pertinent |
| 5191 | Paul et al.,          | 2012 | Global spine j. 2012; 2                                     | non pertinent |
| 5192 | Patel et al.,         | 2012 | Knee Surg Sports Traumatol Arthrosc. 2012; 20(6):1152-1158  | non pertinent |

|      |                    |      |                                                                   |               |
|------|--------------------|------|-------------------------------------------------------------------|---------------|
| 5193 | Patel et al.,      | 2012 | Thorax. 2012; 67(5):418-425                                       | non pertinent |
| 5194 | Pasha et al.,      | 2012 | J of babol university of medical sciences. 2012; 14(1):71-76      | non pertinent |
| 5195 | Park et al.,       | 2012 | Alimentary pharmacology & therapeutics. 2012; 35(1):56-65         | non pertinent |
| 5196 | Panahi et al.,     | 2012 | Thescientificworld j. 2012:285274                                 | non pertinent |
| 5197 | Paakkonen et al.,  | 2012 | Pediatric infectious disease j. 2012; 31(5):436-438               | non pertinent |
| 5198 | Ostergaard et al., | 2012 | Vaccine. 2012; 30(4):774-783                                      | non pertinent |
| 5199 | Osteras et al.,    | 2012 | J Bodyw Mov Ther. 2012; 16(4):456-463                             | non pertinent |
| 5200 | Olsson et al.,     | 2012 | Scandinavian j of pain. 2012; 3(3):183-                           | non pertinent |
| 5201 | Oliver et al.,     | 2012 | Clinical and translational allergy. 2012; 2(1):11                 | non pertinent |
| 5202 | Olischar et al.,   | 2012 | Neonatology. 2012; 101(4):293-300                                 | non pertinent |
| 5203 | Ohtori et al.,     | 2012 | Spine (Phila Pa 1976). 2012; 37(6):439-444                        | non pertinent |
| 5204 | Odekerken et al.,  | 2012 | Movement disorders. 2012; 27:165                                  | non pertinent |
| 5205 | Nystrom et al.,    | 2012 | J of clinical endocrinology and metabolism. 2012; 97(9):3185-3195 | non pertinent |
| 5206 | Nunley et al.,     | 2012 | Spine (Phila Pa 1976). 2012; 37(6):445-451                        | non pertinent |
| 5207 | Ntr – Fernández    | 2012 | Netherlands Trial Register. 2012                                  | non pertinent |
| 5208 | Ntr - Nieuwhof     | 2012 | Netherlands Trial Register. 2012                                  | non pertinent |
| 5209 | Ntr - Dahan        | 2012 | Netherlands Trial Register. 2012                                  | non pertinent |
| 5210 | Nojima et al.,     | 2012 | J of neuroscience. 2012; 32(4):1293-1300                          | non pertinent |
| 5211 | Nir et al.,        | 2012 | Clin Neurophysiol. 2012; 123(3):605-612                           | non pertinent |
| 5212 | Niesters et al.,   | 2012 | Anesthesiology. 2012; 117(4):868-877                              | non pertinent |
| 5213 | Nct - Buxbaum      | 2012 | National Library of Medicine. 2012                                | non pertinent |
| 5214 | Nct – Ismail       | 2012 | National Library of Medicine. 2012                                | non pertinent |

|      |                        |      |                                                                  |               |
|------|------------------------|------|------------------------------------------------------------------|---------------|
| 5215 | Nct – Richer           | 2012 | National Library of Medicine. 2012                               | non pertinent |
| 5216 | Nct – Taylor           | 2012 | National Library of Medicine. 2012                               | non pertinent |
| 5217 | Nct – van der Does     | 2012 | National Library of Medicine. 2012                               | non pertinent |
| 5218 | Nct – Carletto et al., | 2012 | Front Psychol. 2016 Apr; 7:526                                   | non pertinent |
| 5219 | Nct – Soravia et al.,  | 2012 | Depress Anxiety. 2018 Oct; 35(10):925-934                        | non pertinent |
| 5220 | Nct – Gouin            | 2012 | National Library of Medicine. 2012                               | non pertinent |
| 5221 | Nct – Chastan          | 2012 | National Library of Medicine. 2012                               | non pertinent |
| 5222 | Nct – Hunter           | 2012 | National Library of Medicine. 2012                               | non pertinent |
| 5223 | Nct – Modi             | 2012 | National Library of Medicine. 2012                               | non pertinent |
| 5224 | Nct – Rini             | 2012 | National Library of Medicine. 2012                               | non pertinent |
| 5225 | Nct – Shani            | 2012 | National Library of Medicine. 2012                               | non pertinent |
| 5226 | Nct – Wegener          | 2012 | National Library of Medicine. 2012                               | non pertinent |
| 5227 | Nct – Airaksinen       | 2012 | National Library of Medicine. 2012                               | non pertinent |
| 5228 | Nct – McCusker et al., | 2012 | Can J Psychiatry. 2017 Jan; 62(1):67-72                          | non pertinent |
| 5229 | Nct – Hendler          | 2012 | National Library of Medicine. 2012                               | non pertinent |
| 5230 | Nct – Borckardt        | 2012 | National Library of Medicine. 2012                               | non pertinent |
| 5231 | Nayak et al.,          | 2012 | African j of urology. 2012; 18(3):135-137                        | non pertinent |
| 5232 | Nave et al.,           | 2012 | J of clinical psychiatry. 2012; 73(9):1179-1186                  | non pertinent |
| 5233 | Nathan et al.,         | 2012 | J of clinical pharmacology. 2012; 52(10):1456-1467               | non pertinent |
| 5234 | Mylona et al.,         | 2012 | Cardiovascular and interventional radiology. 2012; 35(4):875-882 | non pertinent |
| 5235 | Munoz Garcia et al.,   | 2012 | Int J Oral Maxillofac Implants. 2012; 27(2):375-382              | non pertinent |
| 5236 | Multanen et al.,       | 2012 | J of bone and mineral research. 2012; 27                         | non pertinent |
| 5237 | Mukesh et al.,         | 2012 | European j of surgical oncology. 2012; 38(10):918-924            | non pertinent |
| 5238 | Moore et al.,          | 2012 | American j of the medical sciences. 2012; 344(2):90-95           | non pertinent |
| 5239 | Moont et al.,          | 2012 | Brain Res. 2012; 1435:105-117                                    | non pertinent |

|      |                         |      |                                                               |               |
|------|-------------------------|------|---------------------------------------------------------------|---------------|
| 5240 | Mondillon et al.,       | 2012 | Neuropsychologia. 2012; 50(12):2869-2879                      | non pertinent |
| 5241 | Molica                  | 2012 | International j of hematologic oncology. 2012; 1(1):47-55     | non pertinent |
| 5242 | Miguel et al.,          | 2012 | Neuropsychopharmacology. 2012; 38:273-                        | non pertinent |
| 5243 | Mesa et al.,            | 2012 | Value in health. 2012; 15(4):A227                             | non pertinent |
| 5244 | Meeusen et al.,         | 2012 | Annals of neurology. 2012; 71(3):417-426                      | non pertinent |
| 5245 | McDonald et al.,        | 2012 | Pain Med. 2012; 13(11):1397-1406                              | non pertinent |
| 5246 | McCabe                  | 2012 | International j of neuropsychopharmacology. 2012; 15:44       | non pertinent |
| 5247 | Mauclere-Denost et al., | 2012 | European j of endocrinology. 2012; 166(2):261-268             | non pertinent |
| 5248 | Martini et al.,         | 2012 | J of pain research. 2012; 5:51-59                             | non pertinent |
| 5249 | Mansour et al.,         | 2012 | Osteoarthritis and cartilage. 2012; 20:47                     | non pertinent |
| 5250 | Manconi et al.,         | 2012 | Annals of neurology. 2012; 71(6):834-844                      | non pertinent |
| 5251 | Malpeso et al.,         | 2012 | Expert review of cardiovascular therapy. 2012; 10(2):155-157  | non pertinent |
| 5252 | Maeoka et al.,          | 2012 | Neurosci Lett. 2012; 512(1):12-16                             | non pertinent |
| 5253 | Madeddu et al.,         | 2012 | Clinical nutrition (edinburgh, scotland). 2012; 31(2):176-182 | non pertinent |
| 5254 | MacCoon et al.,         | 2012 | Behav Res Ther. 2012; 50(1):3-12                              | non pertinent |
| 5255 | Lu et al.,              | 2012 | Vaccine. 2012; 30(24):3526-3533                               | non pertinent |
| 5256 | Lopez et al.,           | 2012 | Trials. 2012; 13                                              | non pertinent |
| 5257 | Lonsdale et al.,        | 2012 | BMC musculoskeletal disorders. 2012; 13:104                   | non pertinent |
| 5258 | Liu et al.,             | 2012 | Chinese j of cardiology. 2012; 40(10):840-843                 | non pertinent |
| 5259 | Lischke et al.,         | 2012 | Psychoneuroendocrinology. 2012; 37(9):1431-1438               | non pertinent |
| 5260 | Linstedt et al.,        | 2012 | Acta Anaesthesiol Scand. 2012; 56(6):762-769                  | non pertinent |

|      |                     |      |                                                                                                 |               |
|------|---------------------|------|-------------------------------------------------------------------------------------------------|---------------|
| 5261 | Lim et al.,         | 2012 | Clinical endocrinology. 2012; 77(2):215-233                                                     | non pertinent |
| 5262 | Liekweg et al.,     | 2012 | Supportive care in cancer. 2012; 20(11):2669-2677                                               | non pertinent |
| 5263 | Li et al.,          | 2012 | World chinese j of digestology. 2012; 20(24):2276-2280                                          | non pertinent |
| 5264 | Lelic et al.,       | 2012 | Eur J Pain. 2012; 16(6):827-837                                                                 | non pertinent |
| 5265 | Lee et al.,         | 2012 | Pain. 2012; 153(6):1301-1310                                                                    | non pertinent |
| 5266 | Lee et al.,         | 2012 | Complement Ther Med. 2012; 20(6):409-416                                                        | non pertinent |
| 5267 | Lee et al.,         | 2012 | Arthroscopy. 2012; 28(1):34-42                                                                  | non pertinent |
| 5268 | Lebon et al.,       | 2012 | Appl Psychophysiol Biofeedback. 2012; 37(1):45-51                                               | non pertinent |
| 5269 | Latif               | 2012 | Malaysian orthopaedic j. 2012; 6:43-                                                            | non pertinent |
| 5270 | Labuschagne et al., | 2012 | International j of neuropsychopharmacology. 2012; 15(7):883-896                                 | non pertinent |
| 5271 | Kruger et al.,      | 2012 | European psychiatry. 2012; 27                                                                   | non pertinent |
| 5272 | Kraus et al.,       | 2012 | Osteoarthritis and cartilage. 2012; 20(4):271-278                                               | non pertinent |
| 5273 | Krahn et al.,       | 2012 | Circulation: arrhythmia and electrophysiology. 2012; 5(5):933-940                               | non pertinent |
| 5274 | Kotsis et al.,      | 2012 | Neurogastroenterology and motility. 2012; 24(10):935-e462                                       | non pertinent |
| 5275 | Korovessis et al.,  | 2012 | European j of orthopaedic surgery & traumatology: orthopedie traumatologie. 2012; 22(8):639-645 | non pertinent |
| 5276 | Kocyigit et al.,    | 2012 | Clin J Pain. 2012; 28(7):581-588                                                                | non pertinent |
| 5277 | Knorr et al.,       | 2012 | Psychiatry Res. 2012; 200(2-3):354-360                                                          | non pertinent |
| 5278 | Kinsman et al.,     | 2012 | Australian j of rural health. 2012; 20(2):59-66                                                 | non pertinent |
| 5279 | Kim et al.,         | 2012 | American j of sports medicine. 2012; 40(4):815-821                                              | non pertinent |

|      |                     |      |                                                                    |               |
|------|---------------------|------|--------------------------------------------------------------------|---------------|
| 5280 | Kessous et al.,     | 2012 | Archives of gynecology and obstetrics. 2012; 286(1):75-79          | non pertinent |
| 5281 | Kemp et al.,        | 2012 | Pain Physician. 2012; 15(5):E693-699                               | non pertinent |
| 5282 | Kawasaki et al.,    | 2012 | J of cognitive neuroscience. 2012; 24(6):1358-1370                 | non pertinent |
| 5283 | Katz et al.,        | 2012 | European neuropsychopharmacology. 2012; 22:220-221                 | non pertinent |
| 5284 | Karadas et al.,     | 2012 | Balkan medical j. 2012; 29(2):184-187                              | non pertinent |
| 5285 | Kapural             | 2012 | Regional anesthesia and pain medicine. 2012; 37(5 SUPPL 1):E56-60  | non pertinent |
| 5286 | Kader et al.,       | 2012 | Ortopedia, traumatologia, rehabilitacija. 2012; 14(3):251-259      | non pertinent |
| 5287 | Jones et al.,       | 2012 | Arthritis and rheumatism. 2012; 64:418-                            | non pertinent |
| 5288 | Jeong et al.,       | 2012 | Alimentary pharmacology & therapeutics. 2012; 35(9):1088-1096      | non pertinent |
| 5289 | Jeong et al.,       | 2012 | Anesthesiology. 2012; 116(5):1047-1056                             | non pertinent |
| 5290 | Jensen et al.,      | 2012 | American j of clinical nutrition. 2012; 96(1):5-13                 | non pertinent |
| 5291 | Jensen et al.,      | 2012 | Pain. 2012; 153(7):1495-1503                                       | non pertinent |
| 5292 | Jakobsen et al.,    | 2012 | J of cardiothoracic and vascular anesthesia. 2012; 26(6):1039-1047 | non pertinent |
| 5293 | Isrctn - Torkington | 2012 | ISRCTN Registry. 2012                                              | non pertinent |
| 5294 | Isrctn - Clark      | 2012 | ISRCTN Registry. 2012                                              | non pertinent |
| 5295 | Inagaki et al.,     | 2012 | Neuroimage. 2012 , 59(4):3222-3226                                 | non pertinent |
| 5296 | Iikuni et al.,      | 2012 | J of bone and mineral metabolism. 2012; 30(6):674-682              | non pertinent |
| 5297 | Huling et al.,      | 2012 | J Oral Pathol Med. 2012; 41(2):149-152                             | non pertinent |

|      |                     |      |                                                                                      |               |
|------|---------------------|------|--------------------------------------------------------------------------------------|---------------|
| 5298 | Huang et al.,       | 2012 | Gastroenterology. 2012; 142(5 SUPPL 1):450                                           | non pertinent |
| 5299 | Hu et al.,          | 2012 | National medical j of china. 2012; 92(10):679-684                                    | non pertinent |
| 5300 | Horneff et al.,     | 2012 | Arthritis Res Ther. 2012; 14(5):R230                                                 | non pertinent |
| 5301 | Hoffmann et al.,    | 2012 | New England j of medicine. 2012; 367(4):299-308                                      | non pertinent |
| 5302 | Hindi Attar et al., | 2012 | PLoS One. 2012; 7(8):e42397                                                          | non pertinent |
| 5303 | Henke et al.,       | 2012 | J of clinical oncology. 2012; 30(15 SUPPL 1)                                         | non pertinent |
| 5304 | Henke et al.,       | 2012 | Onkologie. 2012; 35:139-                                                             | non pertinent |
| 5305 | Hendel et al.,      | 2012 | Clinical cardiology. 2012; 35(6):354-358                                             | non pertinent |
| 5306 | Heiney et al.,      | 2012 | Cancer. 2012; 118(15):3822-3832                                                      | non pertinent |
| 5307 | Hawkey et al.,      | 2012 | Alimentary pharmacology & therapeutics. 2012; 35(7):819-827                          | non pertinent |
| 5308 | Hatz et al.,        | 2012 | Vaccine. 2012; 30(23):3470-3477                                                      | non pertinent |
| 5309 | Hashmi et al.,      | 2012 | Molecular pain. 2012; 8:29                                                           | non pertinent |
| 5310 | Hamza et al.,       | 2012 | Pain medicine (united states). 2012; 13(10):1304-1313                                | non pertinent |
| 5311 | Hampstead et al.,   | 2012 | Neuropsychology. 2012; 26(3):385-399                                                 | non pertinent |
| 5312 | Gulec               | 2012 | J of the european academy of dermatology and venereology: JEADV. 2012; 26(3):314-318 | non pertinent |
| 5313 | Guilfoyle et al.,   | 2012 | Spine J. 2012; 12(8):646-651                                                         | non pertinent |
| 5314 | Goff                | 2012 | Neuropsychopharmacology. 2012; 38:21-22                                              | non pertinent |
| 5315 | Godlewska et al.,   | 2012 | Psychol Med. 2012; 42(12):2609-2617                                                  | non pertinent |
| 5316 | Gisbert et al.,     | 2012 | Alimentary pharmacology & therapeutics. 2012; 35(8):941-947                          | non pertinent |
| 5317 | Gilman et al.,      | 2012 | Neuropsychopharmacology. 2012; 37(2):467-477                                         | non pertinent |



|      |                          |      |                                                               |               |
|------|--------------------------|------|---------------------------------------------------------------|---------------|
| 5318 | Giles et al,             | 2012 | J of clinical hypertension. 2012; 14(5):299-306               | non pertinent |
| 5319 | George et al,            | 2012 | Alcoholism: clinical and experimental research. 2012; 36:269A | non pertinent |
| 5320 | Geliebter et al,         | 2012 | Appetite. 2012; 59(3):956-959                                 | non pertinent |
| 5321 | Gedde-Dahl et al,        | 2012 | Complement Ther Clin Pract. 2012; 18(1):60-65                 | non pertinent |
| 5322 | Gamble et al,            | 2012 | Pediatr Emerg Care. 2012; 28(10):1003-1008                    | non pertinent |
| 5323 | Gabbay et al,            | 2012 | Pediatrics. 2012; 129(5):e1439-e1500                          | non pertinent |
| 5324 | Fukase et al,            | 2012 | Vaccine. 2012; 30(33):5030-5037                               | non pertinent |
| 5325 | Fujimoto et al,          | 2012 | Circ J. 2012; 76(10):2419-2425                                | non pertinent |
| 5326 | French et al,            | 2012 | Epilepsy currents. 2012; 12(1 SUPPL 1)                        | non pertinent |
| 5327 | Fonteyne et al,          | 2012 | Int J Radiat Oncol Biol Phys. 2012; 83(1):46-52               | non pertinent |
| 5328 | Finan et al,             | 2012 | Clin J Pain. 2012; 28(8):687-692                              | non pertinent |
| 5329 | Feng et al,              | 2012 | J of clinical neuroscience. 2012; 19(8):1130-1133             | non pertinent |
| 5330 | Fasmer et al,            | 2012 | J Acupunct Meridian Stud. 2012; 5(1):15-20                    | non pertinent |
| 5331 | Fairhurst et al,         | 2012 | PLoS One. 2012; 7(10):e48711                                  | non pertinent |
| 5332 | Eudract number - Dörfler | 2012 | EU Clinical Trial Register. 2012                              | non pertinent |
| 5333 | Euctr, I.T.              | 2012 | EU Clinical Trials Register. 2012                             | non pertinent |
| 5334 | Euctr, E.S.              | 2012 | EU Clinical Trials Register. 2012                             | non pertinent |
| 5335 | Euctr, E.S.              | 2012 | EU Clinical Trials Register. 2012                             | non pertinent |
| 5336 | Euctr, D.E.              | 2012 | EU Clinical Trials Register. 2012                             | non pertinent |
| 5337 | Euctr, C.Z.              | 2012 | EU Clinical Trials Register. 2012                             | non pertinent |
| 5338 | England et al,           | 2012 | Stroke: a j of cerebral circulation. 2012; 43(2):405-411      | non pertinent |
| 5339 | Elwir et al,             | 2012 | Gastrointestinal endoscopy. 2012; 75(4):AB308-                | non pertinent |
| 5340 | Ellingson et al,         | 2012 | J Pain. 2012; 13(2):195-206                                   | non pertinent |
| 5341 | Edginton et al,          | 2012 | Clinical pharmacology and therapeutics. 2012; 91:45-46        | non pertinent |

|      |                         |      |                                                              |               |
|------|-------------------------|------|--------------------------------------------------------------|---------------|
| 5342 | Ebert et al.,           | 2012 | Am J Sports Med. 2012; 40(7):1527-1537                       | non pertinent |
| 5343 | Duval et al.,           | 2012 | BMC infectious diseases. 2012; 12 J Back                     | non pertinent |
| 5344 | Durmus et al.,          | 2012 | Musculoskeletal Rehabil. 2012; 25(4):275-284                 | non pertinent |
| 5345 | Dubsky et al.,          | 2012 | J of clinical oncology. 2012; 30(7):722-728                  | non pertinent |
| 5346 | Drks - Martin           | 2012 | Deutsches Register Klinischer Studien. 2012                  | non pertinent |
| 5347 | Drescher et al.,        | 2012 | Headache. 2012; 52(4):573-581                                | non pertinent |
| 5348 | Drake et al.,           | 2012 | PLoS One. 2012; 7(4)                                         | non pertinent |
| 5349 | Downar et al.,          | 2012 | Biological psychiatry. 2012; 71(8):28-                       | non pertinent |
| 5350 | Diers et al.,           | 2012 | Exp Brain Res. 2012; 218(4):619-628                          | non pertinent |
| 5351 | Demyttenaere et al.,    | 2012 | Current medical research and opinion. 2012; 28(1):41-48      | non pertinent |
| 5352 | Demir et al.,           | 2012 | Rev Bras Anesthesiol. 2012; 62(4):511-519                    | non pertinent |
| 5353 | Dellapina et al.,       | 2012 | Pain. 2012; 153(11):2267-2273                                | non pertinent |
| 5354 | Della Cioppa et al.,    | 2012 | Human vaccines and immunotherapeutics. 2012; 8(2):216-227    | non pertinent |
| 5355 | Del-Ben et al.,         | 2012 | Psychopharmacol. 2012; 26(4):443-451                         | non pertinent |
| 5356 | Deakin et al.,          | 2012 | Neuropsychopharmacology. 2012; 38:209-210                    | non pertinent |
| 5357 | Deakin et al.,          | 2012 | International j of neuropsychopharmacology. 2012; 15:144     | non pertinent |
| 5358 | De Wijkerslooth et al., | 2012 | Gut. 2012; 61(11):1552-1559                                  | non pertinent |
| 5359 | Davis et al.,           | 2012 | Age Ageing. 2012; 41(4):495-501                              | non pertinent |
| 5360 | Dasilva et al.,         | 2012 | Headache. 2012; 52(8):1283-1295                              | non pertinent |
| 5361 | Damiano et al.,         | 2012 | Human vaccines and immunotherapeutics. 2012; 8(10):1425-1430 | non pertinent |

|      |                     |      |                                                                                                       |               |
|------|---------------------|------|-------------------------------------------------------------------------------------------------------|---------------|
| 5362 | Daly et al.,        | 2012 | Archives of<br>general<br>psychiatry. 2012;<br>69(10):1003-1013                                       | non pertinent |
| 5363 | Cortes et al.,      | 2012 | New England j of<br>medicine. 2012;<br>367(22):2075-<br>2088                                          | non pertinent |
| 5364 | Collins et al.,     | 2012 | Am J Obstet<br>Gynecol. 2012;<br>206(5):438.e431-<br>436                                              | non pertinent |
| 5365 | Cluze et al.,       | 2012 | Annals of<br>oncology. 2012;<br>23(4):882-890                                                         | non pertinent |
| 5366 | Citerio et al.,     | 2012 | Eur J Anaesthesiol.<br>2012; 29(8):371-<br>379                                                        | non pertinent |
| 5367 | Chung et al.,       | 2012 | J of<br>gastroenterology<br>and hepatology.<br>2012; 27(11):1675-<br>1680                             | non pertinent |
| 5368 | Chua et al.,        | 2012 | Brain injury. 2012;<br>26(4-5):492-493                                                                | non pertinent |
| 5369 | Chu et al.,         | 2012 | J of<br>neurogastroentero<br>logy and motility.<br>2012;<br>18(3):305//316                            | non pertinent |
| 5370 | Christanell et al., | 2012 | Sports medicine,<br>arthroscopy,<br>rehabilitation,<br>therapy and<br>technology. 2012;<br>4(1)       | non pertinent |
| 5371 | Cho et al.,         | 2012 | Cancer. 2012;<br>118(24):6055-<br>6062                                                                | non pertinent |
| 5372 | Cheng et al.,       | 2012 | J of cognitive<br>neuroscience.<br>2012; 24(6):1411-<br>1419                                          | non pertinent |
| 5373 | Chen et al.,        | 2012 | J Ocul Pharmacol<br>Ther. 2012;<br>28(4):414-419                                                      | non pertinent |
| 5374 | Chan et al.,        | 2012 | PLoS One. 2012;<br>7(6):e40215                                                                        | non pertinent |
| 5375 | Chambers et al.,    | 2012 | Clinical cancer<br>research. 2012;<br>18(9):2668-2678                                                 | non pertinent |
| 5376 | Cardoso et al.,     | 2012 | Int J Radiat Oncol<br>Biol Phys. 2012;<br>82(3):1285-1291                                             | non pertinent |
| 5377 | Cao et al.,         | 2012 | Trials. 2012;<br>13:131                                                                               | non pertinent |
| 5378 | Camilleri et al.,   | 2012 | American j of<br>physiology.<br>Gastrointestinal<br>and liver<br>physiology. 2012;<br>303(1):G120-128 | non pertinent |

|      |                        |      |                                                                                |               |
|------|------------------------|------|--------------------------------------------------------------------------------|---------------|
| 5379 | Calvanese et al.,      | 2012 | Open colorectal cancer j. 2012; 5(1):9-14                                      | non pertinent |
| 5380 | Buttagat et al.,       | 2012 | Complement Ther Med. 2012; 20(4):167-174                                       | non pertinent |
| 5381 | Busch et al.,          | 2012 | Pain Med. 2012; 13(2):215-228                                                  | non pertinent |
| 5382 | Buijze et al.,         | 2012 | J of hand surgery. 2012; 37(8):24-                                             | non pertinent |
| 5383 | Brovold et al.,        | 2012 | Arch Gerontol Geriatr. 2012; 55(2):453-459                                     | non pertinent |
| 5384 | Brakemeier et al.,     | 2012 | Nephrology dialysis transplantation. 2012; 27(1):423-428                       | non pertinent |
| 5385 | Bossong et al.,        | 2012 | J of cognitive neuroscience. 2012; 24(3):588-599                               | non pertinent |
| 5386 | Borglum et al.,        | 2012 | Reg Anesth Pain Med. 2012; 37(3):294-301                                       | non pertinent |
| 5387 | Blow et al.,           | 2012 | Alcoholism: clinical and experimental research. 2012; 36:24A-                  | non pertinent |
| 5388 | Beusterien et al.,     | 2012 | Health and quality of life outcomes. 2012; 10                                  | non pertinent |
| 5389 | Benson et al.,         | 2012 | Pain. 2012; 153(4):794-799                                                     | non pertinent |
| 5390 | Behmanesth et al.,     | 2012 | Koomesh. 2012; 14(3):309-315                                                   | non pertinent |
| 5391 | Barti et al.,          | 2012 | Arch Orthop Trauma Surg. 2012; 132(1):41-50                                    | non pertinent |
| 5392 | Barraclough            | 2012 | J of thoracic oncology. 2012; 7(9 SUPPL 3):159                                 | non pertinent |
| 5393 | Azedevio Silva et al., | 2012 | Revista brasileira de anestesiologia. 2012; 62(1):3-9                          | non pertinent |
| 5394 | Aversa et al.,         | 2012 | J of maternal-fetal and neonatal medicine. 2012; 25:134                        | non pertinent |
| 5395 | Aupperle et al.,       | 2012 | Frontiers in human neuroscience. 2012; 6(MAR)                                  | non pertinent |
| 5396 | Arndt et al.,          | 2012 | Orthopaedics and traumatology: surgery and research. 2012; 98(SUPPL 6):131-138 | non pertinent |
| 5397 | Armstrong et al.,      | 2012 | J Nutr. 2012; 142(2):382-388                                                   | non pertinent |

|      |                    |      |                                                                                                            |               |
|------|--------------------|------|------------------------------------------------------------------------------------------------------------|---------------|
| 5398 | Armitage et al.,   | 2012 | Anxiety Stress<br>Coping. 2012;<br>25(2):155-165                                                           | non pertinent |
| 5399 | Aluwini et al.,    | 2012 | Radiotherapy and<br>oncology. 2012;<br>103:84-85                                                           | non pertinent |
| 5400 | Alegre et al.,     | 2012 | Pain. 2012;<br>153(7):1382-1389                                                                            | non pertinent |
| 5401 | Al-Shoha et al.,   | 2012 | Spine. 2012;<br>37(25):E1567-<br>E1571                                                                     | non pertinent |
| 5402 | Akbar et al.,      | 2012 | BMC<br>complementary<br>and alternative<br>medicine. 2012;<br>12                                           | non pertinent |
| 5403 | Alkawa et al.,     | 2012 | J of rheumatology.<br>2012; 39(1):167-<br>173                                                              | non pertinent |
| 5404 | Ahn et al.,        | 2012 | Hepatology<br>international.<br>2012; 6(4):696-<br>706                                                     | non pertinent |
| 5405 | Agren et al.,      | 2012 | Science. 2012;<br>337(6101):1550-<br>1552                                                                  | non pertinent |
| 5406 | Actrn – Lehman     | 2012 | Australian New<br>Zealand Clinical<br>Trials Registry.<br>2012                                             | non pertinent |
| 5407 | Acheson et al.,    | 2012 | Human<br>psychopharmacol<br>ogy. 2012;<br>27(4):419-427                                                    | non pertinent |
| 5408 | Ziefle et al.,     | 2011 | J of<br>immunotherapy.<br>2011; 34(4):403-<br>408                                                          | non pertinent |
| 5409 | Zhou et al.,       | 2011 | Fertil Steril. 2011;<br>95(3):900-905                                                                      | non pertinent |
| 5410 | Zhao et al.,       | 2011 | Drug and alcohol<br>dependence. 2011;<br>118(2-3):224-229                                                  | non pertinent |
| 5411 | Zhao et al.,       | 2011 | Zhongguo wie<br>zhong bing ji jiu yi<br>xue (Chinese<br>critical care<br>medicine). 2011;<br>23(4):220-223 | non pertinent |
| 5412 | Zeng et al.,       | 2011 | Chinese j of<br>oncology. 2011;<br>33(7):517-519                                                           | non pertinent |
| 5413 | Zanette et al.,    | 2011 | SAAD Dig. 2011;<br>27:8-15                                                                                 | non pertinent |
| 5414 | Zaffagnini et al., | 2011 | Am J Sports Med.<br>2011; 39(5):977-<br>985                                                                | non pertinent |
| 5415 | Yoo et al.,        | 2011 | European child &<br>adolescent<br>psychiatry. 2011;<br>20(3):127-135                                       | non pertinent |

|      |                       |      |                                                                   |               |
|------|-----------------------|------|-------------------------------------------------------------------|---------------|
| 5416 | Yasuda et al.,        | 2011 | J of diabetes investigation. 2011; 2(2):132-139                   | non pertinent |
| 5417 | Yang                  | 2011 | Drugs. 2011; 71(15):2067-2077                                     | non pertinent |
| 5418 | Wyndaele et al.,      | 2011 | BJU international. 2011; 107(4):603-611                           | non pertinent |
| 5419 | Wolfensberger et al., | 2011 | Nucl Med Commun. 2011; 32(10):896-902                             | non pertinent |
| 5420 | Willy et al.,         | 2011 | J of orthopaedic and sports physical therapy. 2011; 41(9):625-632 | non pertinent |
| 5421 | Wigal et al.,         | 2011 | J of child and adolescent psychopharmacology. 2011; 21(2):121-131 | non pertinent |
| 5422 | Wehrfritz et al.,     | 2011 | European j of pain (London, England). 2011; 15(9):907-912         | non pertinent |
| 5423 | Wang et al.,          | 2011 | PLoS One. 2011; 6(8):e23536                                       | non pertinent |
| 5424 | Wang et al.,          | 2011 | Lancet. 2011; 377(9778):1663-1672                                 | non pertinent |
| 5425 | Wang et al.,          | 2011 | Chinese medical j. 2011; 124(24):4144-4148                        | non pertinent |
| 5426 | Walter et al.,        | 2011 | Naunyn-Schmiedeberg's archives of pharmacology. 2011; 383:75      | non pertinent |
| 5427 | Wallentine et al.,    | 2011 | Anesth Analg. 2011; 113(4):738-741                                | non pertinent |
| 5428 | Wallach et al.,       | 2011 | Iraael j of psychiatry and related sciences. 2011; 48(2):91-97    | non pertinent |
| 5429 | Von Wagner et al.,    | 2011 | Eur Radiol. 2011; 21(10):2046-2055                                | non pertinent |
| 5430 | Vokurka et al.,       | 2011 | Medical science monitor. 2011; 17(10):CR572-CR576                 | non pertinent |
| 5431 | Verstovsek et al.,    | 2011 | Blood. 2011; 118(21)                                              | non pertinent |
| 5432 | Verstovsek et al.,    | 2011 | Blood. 2011; 118(21)                                              | non pertinent |
| 5433 | Veldhuyzen et al.,    | 2011 | Alimentary pharmacology & therapeutics. 2011; 34(7):714-723       | non pertinent |

|      |                        |      |                                                                   |               |
|------|------------------------|------|-------------------------------------------------------------------|---------------|
| 5434 | Van Noord et al.,      | 2011 | Pulmonary pharmacology & therapeutics. 2011; 24(6):666-672        | non pertinent |
| 5435 | Van den Broeke et al., | 2011 | Mol Pain. 2011; 7:28                                              | non pertinent |
| 5436 | Van den Berg et al.,   | 2011 | Psycho-oncology. 2011; 20:67-68                                   | non pertinent |
| 5437 | Van Damme et al.,      | 2011 | Vaccine. 2011; 29(35):5932-5939                                   | non pertinent |
| 5438 | Tulloch et al.,        | 2011 | Phyiotherapy (united kingdom). 2011; 97:e1261-e1262               | non pertinent |
| 5439 | Torres et al.,         | 2011 | American j of kidney diseases. 2011; 57(5):692-699                | non pertinent |
| 5440 | Tompkins et al.,       | 2011 | Knee Surg Sports Traumatol Arthrosc. 2011; 19(5):787-791          | non pertinent |
| 5441 | Tettamanti et al.,     | 2011 | Physiotherapy (united kingdom). 2011; 97(var.pagings):e1224-e1225 | non pertinent |
| 5442 | Tadini et al.,         | 2011 | J ect. 2011; 27(2):134-140                                        | non pertinent |
| 5443 | Surguladze et al.,     | 2011 | J Psychopharmacol. 2011; 25(6):722-733                            | non pertinent |
| 5444 | Strasser et al.,       | 2011 | Clin Rheumatol. 2011; 30(5):623-632                               | non pertinent |
| 5445 | Stancak et al.,        | 2011 | PLoS One. 2011; 6(5):e19744                                       | non pertinent |
| 5446 | Staahl et al.,         | 2011 | Basic ClinPharmacol Toxicol. 2011; 109(5):321-327                 | non pertinent |
| 5447 | Sripada et al.,        | 2011 | Neuroimage. 2011; 55(1):371-380                                   | non pertinent |
| 5448 | Sprenger et al.,       | 2011 | Pain. 2011; 152(2):428-439                                        | non pertinent |
| 5449 | Spironelli et al.,     | 2011 | PLoS One. 2011; 6(9):e24932                                       | non pertinent |
| 5450 | Soliman et al.,        | 2011 | Middle East J Anaesthesiol. 2011; 21(3):325-334                   | non pertinent |
| 5451 | Smith et al.,          | 2011 | Neurogastroenter ol Motil. 2011; 23(7):648-e260                   | non pertinent |
| 5452 | Skriapas et al.,       | 2011 | Urology. 2011; 77(4):905-908                                      | non pertinent |
| 5453 | Simonsson et al.,      | 2011 | Blood. 2011; 118(12):3228-3235                                    | non pertinent |
| 5454 | Sieper et al.,         | 2011 | Arthritis and rheumatism. 2011; 63(10                             | non pertinent |

|      |                    |      |                                                                 |               |
|------|--------------------|------|-----------------------------------------------------------------|---------------|
| 5455 | Shukla et al.,     | 2011 | Mol Pain. 2011; 7:45                                            | non pertinent |
| 5456 | Short et al.,      | 2011 | Pain. 2011; 152(11):2477-2484                                   | non pertinent |
| 5457 | Shiratori et al.,  | 2011 | Neurogastroenterol Motil. 2011; 23(4):323-329, e155-326         | non pertinent |
| 5458 | Shahab et al.,     | 2011 | Health psychol. 2011; 30(1):49-57                               | non pertinent |
| 5459 | Sedegah et al.,    | 2011 | PLoS One. 2011; 6(10)                                           | non pertinent |
| 5460 | Scott              | 2011 | CNS Drugs. 2011; 25(12):1073-1085                               | non pertinent |
| 5461 | Schuster et al.,   | 2011 | Physiotherapy (united kingdom). 2011; 97:e1116-                 | non pertinent |
| 5462 | Schunck et al.,    | 2011 | J Psychopharmacol. 2011; 25(1):52-59                            | non pertinent |
| 5463 | Schoffski et al.,  | 2011 | Lancet oncology. 2011; 12(11):1045-1052                         | non pertinent |
| 5464 | Schlimp et al.,    | 2011 | Schmerz (berlin, germany). 2011; 25(3):290-295                  | non pertinent |
| 5465 | Satoh et al.,      | 2011 | J of diabetes investigation. 2011; 2(6):457-463                 | non pertinent |
| 5466 | Ruutu et al.,      | 2011 | Haematologica. 2011; 96(9):1344-1350                            | non pertinent |
| 5467 | Rutter et al.,     | 2011 | Antiviral therapy. 2011; 16(8):1327-1333                        | non pertinent |
| 5468 | Rudwaleit et al.,  | 2011 | J of rheumatology. 2011; 38(1):79-86                            | non pertinent |
| 5469 | Rubinstein et al., | 2011 | CMAJ: Canadian Medical Association j. 2011; 183(13):E1033-E1037 | non pertinent |
| 5470 | Rothrock et al.,   | 2011 | Current medical research and opinion. 2011; 27(11):2185-2191    | non pertinent |
| 5471 | Roth et al.,       | 2011 | Postgraduate medicine. 2011; 123(6):180-188                     | non pertinent |
| 5472 | Roth et al.,       | 2011 | International j of andrology. 2011; 34(6 PART 1):541-547        | non pertinent |
| 5473 | Rota et al.,       | 2011 | J of headache and pain. 2011; 12(3):339-345                     | non pertinent |
| 5474 | Rose et al.,       | 2011 | BMC complementary and alternative medicine. 2011; 11:45         | non pertinent |



|      |                          |      |                                                                    |               |
|------|--------------------------|------|--------------------------------------------------------------------|---------------|
| 5475 | Romics et al.,           | 2011 | Urologia internationalis. 2011; 86(1):102-109                      | non pertinent |
| 5476 | Rogers et al.,           | 2011 | American j of cardiology. 2011; 107(5):643-650                     | non pertinent |
| 5477 | Roessler et al.,         | 2011 | European j of pain supplements. 2011; 5(1):156                     | non pertinent |
| 5478 | Richebe et al.,          | 2011 | J Cardiothorac Vasc Anesth. 2011; 25(6):917-925                    | non pertinent |
| 5479 | Rezvani et al.,          | 2011 | Haematologica. 2011; 96(3):432-440                                 | non pertinent |
| 5480 | Renkawitz et al.,        | 2011 | BMC musculoskeletal disorders. 2011; 12:192                        | non pertinent |
| 5481 | Reinke et al.,           | 2011 | Transplantation proceedings. 2011; 43(5):1641-1646                 | non pertinent |
| 5482 | Razak et al.,            | 2011 | British j of cancer. 2011; 104(5):756-762                          | non pertinent |
| 5483 | Randelli et al.,         | 2011 | J of shoulder and elbow surgery. 2011; 20(4):518-528               | non pertinent |
| 5484 | Raj et al.,              | 2011 | Indian j of physiology and pharmacology. 2011; 55(5 SUPPL 1):63-64 | non pertinent |
| 5485 | Pinera et al.,           | 2011 | Eur Spine J. 2011; 20 Suppl. 3: 408-414                            | non pertinent |
| 5486 | Phatak et al.,           | 2011 | J Pediatr Gastroenterol Nutr. 2011; 53(1):71-74                    | non pertinent |
| 5487 | Perez-Monteverde et al., | 2011 | International j of clinical practice. 2011; 65(9):930-938          | non pertinent |
| 5488 | Pelkonen et al.,         | 2011 | Lancet infectious diseases. 2011; 11(8):613-621                    | non pertinent |
| 5489 | Pavelka et al.,          | 2011 | Osteoarthritis and cartilage. 2011; 19(11):1294-1300               | non pertinent |
| 5490 | Park et al.,             | 2011 | Acta anaesthesiologica Scandinavica. 2011; 55(1):87-91             | non pertinent |
| 5491 | Park et al.,             | 2011 | Cancer chemotherapy and pharmacology. 2011; 68(5):1263-1271        | non pertinent |

|      |                   |      |                                                                 |               |
|------|-------------------|------|-----------------------------------------------------------------|---------------|
| 5492 | Parhizgar et al., | 2011 | European j of medical research. 2011; 16:59                     | non pertinent |
| 5493 | Pareyson et al.,  | 2011 | The lancet. Neurology. 2011; 10(4):320-328                      | non pertinent |
| 5494 | Pareyson et al.,  | 2011 | J of the peripheral nervous system. 2011; 16:104-105            | non pertinent |
| 5495 | Pareyson et al.,  | 2011 | Lancet neurology. 2011; 10(4):320-328                           | non pertinent |
| 5496 | Pakzad et al.,    | 2011 | Physiotherapy (united kingdom). 2011; 97(var.pagings):e956      | non pertinent |
| 5497 | Padula et al.,    | 2011 | Alcohol and alcoholism. 2011; 46(5):547-552                     | non pertinent |
| 5498 | Otten et al.,     | 2011 | J of rheumatology. 2011; 38(10):2258-2263                       | non pertinent |
| 5499 | Osteras et al.,   | 2011 | Physiotherapy (united kingdom). 2011; 97:e946-e947              | non pertinent |
| 5500 | Orvieto et al.,   | 2011 | BJU international. 2011; 108(7):1185-1189                       | non pertinent |
| 5501 | Olesen et al.,    | 2011 | Aliment Pharmacol Ther. 2011; 34(8):878-887                     | non pertinent |
| 5502 | Oh et al.,        | 2011 | Urology. 2011; 78(3):626-630                                    | non pertinent |
| 5503 | Oh et al.,        | 2011 | Clinics in orthopedic surgery. 2011; 3(1):55-61                 | non pertinent |
| 5504 | Ogura et al.,     | 2011 | Alternative therapies in health and medicine. 2011; 17(6):12-17 | non pertinent |
| 5505 | O'Connell et al., | 2011 | Physiotherapy (united kingdom). 2011; 97(var.pagings):e913-e914 | non pertinent |
| 5506 | Nunes et al.,     | 2011 | Revista brasileira de anestesiologia. 2011; 61(3):304-310       | non pertinent |
| 5507 | Ntr - Wijnhoven   | 2011 | Netherlands Trial Register. 2011                                | non pertinent |
| 5508 | Ntr - Boonen      | 2011 | Netherlands Trial Register. 2011                                | non pertinent |
| 5509 | Novotna et al.,   | 2011 | European j of neurology. 2011; 18(9):1122-1131                  | non pertinent |

|      |                         |      |                                                                                 |               |
|------|-------------------------|------|---------------------------------------------------------------------------------|---------------|
| 5510 | Norholt et al.,         | 2011 | International j of clinical pharmacology and therapeutics. 2011; 49(12):722-729 | non pertinent |
| 5511 | Nicholson et al.,       | 2011 | Health technology assessment. 2011; 14(55):193-334                              | non pertinent |
| 5512 | Newberg et al.,         | 2011 | Clin Ther. 2011; 33(12):1894-1903                                               | non pertinent |
| 5513 | Neves et al.,           | 2011 | Anais brasileiros de dermatologia. 2011; 86(6):1092-1101                        | non pertinent |
| 5514 | Nct – Heiney            | 2011 | National Library of Medicine. 2011                                              | non pertinent |
| 5515 | Nct – De Neve           | 2011 | National Library of Medicine. 2011                                              | non pertinent |
| 5516 | Nct – Kingwell          | 2011 | National Library of Medicine. 2011                                              | non pertinent |
| 5517 | Nct – Yerramasu et al., | 2011 | Eur Heart J Cardiovasc Imaging. 2014 Aug; 15(8):886-92                          | non pertinent |
| 5518 | Nct – Rosenfeld         | 2011 | National Library of Medicine. 2011                                              | non pertinent |
| 5519 | Nct – Pickering         | 2011 | National Library of Medicine. 2011                                              | non pertinent |
| 5520 | Nct – Wai               | 2011 | National Library of Medicine. 2011                                              | non pertinent |
| 5521 | Nct – Pitman            | 2011 | National Library of Medicine. 2011                                              | non pertinent |
| 5522 | Nct – Essving           | 2011 | National Library of Medicine. 2011                                              | non pertinent |
| 5523 | Nct – Hölzel et al.,    | 2011 | Front Behav Neurosci. 2016 Jun; 10:124                                          | non pertinent |
| 5524 | Nct – Gouin             | 2011 | National Library of Medicine. 2011                                              | non pertinent |
| 5525 | Nct – Cermak            | 2011 | National Library of Medicine. 2011                                              | non pertinent |
| 5526 | Nct – Choy              | 2011 | National Library of Medicine. 2011                                              | non pertinent |
| 5527 | Nct – Slonim            | 2011 | National Library of Medicine. 2011                                              | non pertinent |
| 5528 | Nct – Lee et al.,       | 2011 | Arthritis Rheumatol. 2018 Aug; 70(8):1308-1318                                  | non pertinent |
| 5529 | Nct – King              | 2011 | National Library of Medicine. 2011                                              | non pertinent |
| 5530 | Nct – Yarnitsky         | 2011 | National Library of Medicine. 2011                                              | non pertinent |
| 5531 | Nct – d_yarnitsky       | 2011 | National Library of Medicine. 2011                                              | non pertinent |
| 5532 | Nct – Söderlund         | 2011 | National Library of Medicine. 2011                                              | non pertinent |
| 5533 | Nct – Rosenblum         | 2011 | National Library of Medicine. 2011                                              | non pertinent |
| 5534 | Navari et al.,          | 2011 | J of supportive oncology. 2011; 9(5):188-195                                    | non pertinent |

|      |                    |      |                                                                       |               |
|------|--------------------|------|-----------------------------------------------------------------------|---------------|
| 5535 | Nabhan et al.,     | 2011 | J of neurosurgery. 2011; 114(1):240-244                               | non pertinent |
| 5536 | Mosges et al.,     | 2011 | Current medical research and opinion. 2011; 27(4):871-878             | non pertinent |
| 5537 | Morris et al.,     | 2011 | BMC Musculoskelet Disord. 2011; 12(1):85                              | non pertinent |
| 5538 | Möri et al.,       | 2011 | J of bodywork and movement therapies. 2011; 15(3):309-318             | non pertinent |
| 5539 | Moore et al.,      | 2011 | European j of anaesthesiology. 2011; 28(6):427-432                    | non pertinent |
| 5540 | Mohanty et al.,    | 2011 | Indian j of palliative care. 2011; 17(4):91-103                       | non pertinent |
| 5541 | Moe et al.,        | 2011 | BMC musculoskeletal disorders. 2011; 257-                             | non pertinent |
| 5542 | Miller et al.,     | 2011 | Academic emergency medicine. 2011; 18(5):458-467                      | non pertinent |
| 5543 | Mieres et al.,     | 2011 | J Womens Health (Larchmt). 2011; 20(9):1261-1268                      | non pertinent |
| 5544 | Mhalla et al.,     | 2011 | Pain. 2011; 152(7):1478-1485                                          | non pertinent |
| 5545 | Mennemeier et al., | 2011 | Laryngoscope. 2011; 121(4):815-822                                    | non pertinent |
| 5546 | Mendonca et al.,   | 2011 | J Pain. 2011; 12(5):610-617                                           | non pertinent |
| 5547 | Melilli et al.,    | 2011 | European j of drug metabolism and pharmacokinetics. 2011; 36(2):71-78 | non pertinent |
| 5548 | Mehdikhani et al., | 2011 | Acta cardiologica. 2011; 66(2):219-224                                | non pertinent |
| 5549 | Meara et al.,      | 2011 | Cleft palate-craniofacial j. 2011; 48(6):690-694                      | non pertinent |
| 5550 | McPherson et al.,  | 2011 | Osteoarthritis and cartilage. 2011; 19:35-36                          | non pertinent |
| 5551 | McLoughlin et al., | 2011 | J Pain. 2011; 12(6):640-651                                           | non pertinent |
| 5552 | McCarthy et al.,   | 2011 | PLoS One. 2011; 6(9)                                                  | non pertinent |
| 5553 | McCann et al.,     | 2011 | Psychopharmacology (Berl). 2011; 217(4):475-484                       | non pertinent |

|      |                         |      |                                                               |               |
|------|-------------------------|------|---------------------------------------------------------------|---------------|
| 5554 | Matthey et al.,         | 2011 | Basic and clinical pharmacology and toxicology. 2011; 109:120 | non pertinent |
| 5555 | Manheimer               | 2011 | Fertility and sterility. 2011; 95(8):2456-2461                | non pertinent |
| 5556 | Manani et al.,          | 2011 | Minerva Stomatol. 2011; 60(7-8):365-381                       | non pertinent |
| 5557 | Lueken et al.,          | 2011 | Eur Neuropsychopharmacol. 2011; 21(7):516-525                 | non pertinent |
| 5558 | Lu et al.,              | 2011 | Clinical drug investigation. 2011; 31(4):221-229              | non pertinent |
| 5559 | Louzada et al.,         | 2011 | Thromb Res. 2011; 128(6):530-535                              | non pertinent |
| 5560 | Lopez-Contreras et al., | 2011 | Movement disorders. 2011; 26:217                              | non pertinent |
| 5561 | Loggia et al.,          | 2011 | PLoS One. 2011; 6(11):e27764                                  | non pertinent |
| 5562 | Locatelli               | 2011 | NDT plus. 2011; 4(SUPPL 1):i3-i5                              | non pertinent |
| 5563 | Ljotsson et al.,        | 2011 | BMC Gastroenterol. 2011; 11:110                               | non pertinent |
| 5564 | Linnebank et al.,       | 2011 | Annals of neurology. 2011; 69(2):352-359                      | non pertinent |
| 5565 | Lindstedt et al.,       | 2011 | PLoS One. 2011; 6(3):e18252                                   | non pertinent |
| 5566 | Liang et al.,           | 2011 | Acta anaesthesiologica Scandinavica. 2011; 55(9):1113-1117    | non pertinent |
| 5567 | Li et al.,              | 2011 | Chinese medical j. 2011; 124(19):3049-3053                    | non pertinent |
| 5568 | Lee et al.,             | 2011 | Canadian j of anesthesia. 2011; 58(11):1001-1006              | non pertinent |
| 5569 | Lee et al.,             | 2011 | Physiotherapy (united kingdom). 2011; 97:e674-                | non pertinent |
| 5570 | Leal et al.,            | 2011 | Pain. 2011; 152(10):2357-2364                                 | non pertinent |
| 5571 | Laslett et al.,         | 2011 | Internal medicine j. 2011; 41:34-                             | non pertinent |
| 5572 | Lang et al.,            | 2011 | Cancer immunology, immunotherapy. 2011; 60(10):1447-1460      | non pertinent |
| 5573 | Ku et al.,              | 2011 | PLoS One. 2011; 6(10):e25155                                  | non pertinent |

|      |                         |      |                                                                |               |
|------|-------------------------|------|----------------------------------------------------------------|---------------|
| 5574 | Kross et al.,           | 2011 | Proc Natl Acad Sci U S A. 2011; 108(15):6270-6275              | non pertinent |
| 5575 | Kristjansdottir et al., | 2011 | European j of pain supplements. 2011; 5(1):259-260             | non pertinent |
| 5576 | Kret et al.,            | 2011 | Neuropsychologia. 2011; 49(5):1187-1193                        | non pertinent |
| 5577 | Kolykhalov et al.,      | 2011 | Neuroscience and behavioral physiology. 2011; 41(5):542-547    | non pertinent |
| 5578 | Kollins et al.,         | 2011 | Pediatrics. 2011; 127(6):e1406-1413                            | non pertinent |
| 5579 | Kjotrod et al.,         | 2011 | Human reproduction (Oxford, England). 2011; 26(8):2045-2053    | non pertinent |
| 5580 | Kim et al.,             | 2011 | Anaesth Intensive Care. 2011; 39(3):418-425                    | non pertinent |
| 5581 | Kim et al.,             | 2011 | Paediatr Anaesth. 2011; 21(4):394-398                          | non pertinent |
| 5582 | Kim et al.,             | 2011 | J Vasc Surg. 2011; 54(2):316-324                               | non pertinent |
| 5583 | Kim et al.,             | 2011 | Pediatric infectious disease j. 2011; 30(12):e235-e243         | non pertinent |
| 5584 | Khan et al.,            | 2011 | British j of cancer. 2011; 104(5):750-755                      | non pertinent |
| 5585 | Kct – Seung-Hyun Yoon   | 2011 | CRIS – Clinical Research Information Service. 2011             | non pertinent |
| 5586 | Karschner et al.,       | 2011 | Clinical chemistry. 2011; 57(1):66-75                          | non pertinent |
| 5587 | Karim et al.,           | 2011 | AIDS (london, england). 2011; 25(7):957-966                    | non pertinent |
| 5588 | Jung et al.,            | 2011 | Acta Anaesthesiol Scand. 2011; 55(1):110-117                   | non pertinent |
| 5589 | Jprn, Umin -            | 2011 | Japan Primary Registries Network. 2011                         | non pertinent |
| 5590 | Jprn, Umin -            | 2011 | Japan Primary Registries Network. 2011                         | non pertinent |
| 5591 | Joseph et al.,          | 2011 | Indian j of medical research, supplement. 2011; 133(5):529-534 | non pertinent |
| 5592 | Jo et al.,              | 2011 | Korean j of anesthesiology. 2011; 60(3):198-204                | non pertinent |

|      |                       |      |                                                       |               |
|------|-----------------------|------|-------------------------------------------------------|---------------|
| 5593 | Jo et al.,            | 2011 | Am J Sports Med. 2011; 39(10):2082-2090               | non pertinent |
| 5594 | Janne et al.,         | 2011 | Clinical cancer research. 2011; 17(5):1131-1139       | non pertinent |
| 5595 | Jadidi et al.,        | 2011 | European j of oral sciences. 2011; 119(3):211-218     | non pertinent |
| 5596 | Isrctn - Ropars       | 2011 | ISRCTN Registry. 2011                                 | non pertinent |
| 5597 | Isrctn – Koskina      | 2011 | ISRCTN Registry. 2011                                 | non pertinent |
| 5598 | Isrctn – Yiqun        | 2011 | ISRCTN Registry. 2011                                 | non pertinent |
| 5599 | Isrctn – Morno-Egea   | 2011 | ISRCTN Registry. 2011                                 | non pertinent |
| 5600 | Isrctn - Bögels       | 2011 | ISRCTN Registry. 2011                                 | non pertinent |
| 5601 | Hursel et al.,        | 2011 | American j of clinical nutrition. 2011; 94(3):804-808 | non pertinent |
| 5602 | Hunstman et al.,      | 2011 | European spine j. 2011; 20(4):503-504                 | non pertinent |
| 5603 | Hubbard et al.,       | 2011 | J Neurosci. 2011; 31(35):12491-12500                  | non pertinent |
| 5604 | Horst                 | 2011 | Physiotherapy (united kingdom). 2011; 97:e1516-1517   | non pertinent |
| 5605 | Holtmann et al.,      | 2011 | Digestion. 2011; 84(4):289-298                        | non pertinent |
| 5606 | Hoft et al.,          | 2011 | J of infectious diseases. 2011; 204(6):845-853        | non pertinent |
| 5607 | Hesse et al.,         | 2011 | Neurologie und rehabilitation. 2011; 17(5-6):233-238  | non pertinent |
| 5608 | Hess et al.,          | 2011 | Proc Natl Acad Sci U S A. 2011; 108(9):3731-3736      | non pertinent |
| 5609 | Henry et al.,         | 2011 | Diabetes, obesity & metabolism. 2011; 13(9):850-858   | non pertinent |
| 5610 | Hara et al.,          | 2011 | Vaccine. 2011; 29(46):8323-8329                       | non pertinent |
| 5611 | Hadjigeorgiou et al., | 2011 | Physiotherapy (united kingdom). 2011; 97:e442-e443    | non pertinent |
| 5612 | Gu et al.,            | 2011 | Circulation j. 2011; 75(4):955-963                    | non pertinent |
| 5613 | Gronlund et al.,      | 2011 | Clinical drug investigation. 2011; 31(3):143-153      | non pertinent |

|      |                      |      |                                                                                      |               |
|------|----------------------|------|--------------------------------------------------------------------------------------|---------------|
| 5614 | Gronlund et al.,     | 2011 | Antimicrobial agents and chemotherapy. 2011; 55(3):1063-1067                         | non pertinent |
| 5615 | Griffin et al.,      | 2011 | J Neurol. 2011; 258(6):991-1000                                                      | non pertinent |
| 5616 | Graversen et al.,    | 2011 | J Neural Eng. 2011; 8(5):056014                                                      | non pertinent |
| 5617 | Goral et al.,        | 2011 | Anaesthesia. 2011; 66(12):1140-1145                                                  | non pertinent |
| 5618 | Gooch et al.,        | 2011 | Behav Pharmacol. 2011; 22(4):354-361                                                 | non pertinent |
| 5619 | Gomez Conesa et al., | 2011 | Physiotherapy (united kingdom). 2011; 97:e418                                        | non pertinent |
| 5620 | Goldstein et al.,    | 2011 | J of the American College of Cardiology. 2011; 58(14):1414-1422                      | non pertinent |
| 5621 | Goktay et al.,       | 2011 | J of oral and maxillofacial surgery. 2011; 69(6):1594-1599                           | non pertinent |
| 5622 | Gatti et al.,        | 2011 | J of orthopaedic and sports physical therapy. 2011; 41(8):542-552                    | non pertinent |
| 5623 | Garnock-Jones        | 2011 | CNS Drugs. 2011; 25(5):435-445                                                       | non pertinent |
| 5624 | Gambus et al.,       | 2011 | Anesth Analg. 2011; 112(2):331-339                                                   | non pertinent |
| 5625 | Gajdos et al.,       | 2011 | Human vaccines. 2011; 7(5):549-556                                                   | non pertinent |
| 5626 | Fung et al.,         | 2011 | Physiotherapy (united kingdom). 2011; 97:e419-                                       | non pertinent |
| 5627 | Fujita et al.,       | 2011 | J of bone and mineral metabolism. 2011; 29(5):588-597                                | non pertinent |
| 5628 | Froholdt et al.,     | 2011 | Spine j. 2011; 11(8):718-725                                                         | non pertinent |
| 5629 | Fritz et al.,        | 2011 | American j of respiratory and critical care medicine. 2011; 183(1 MeetingAbstracts ) | non pertinent |
| 5630 | Frenck et al.,       | 2011 | Vaccine. 2011; 29(34):5666-5674                                                      | non pertinent |
| 5631 | Foroughi et al.,     | 2011 | Clin Biomech (Bristol, Avon). 2011; 26(1):71-77                                      | non pertinent |
| 5632 | Fonseca et al.,      | 2011 | Physiotherapy (united kingdom). 2011; 97:e350-                                       | non pertinent |



|      |                            |      |                                                                                   |               |
|------|----------------------------|------|-----------------------------------------------------------------------------------|---------------|
| 5633 | Foley et al.,              | 2011 | AJR Am J<br>Roentgenol. 2011;<br>197(2):367-373                                   | non pertinent |
| 5634 | Fitzpatrick et al.,        | 2011 | Bone. 2011;<br>49(4):845-852                                                      | non pertinent |
| 5635 | Fedak et al.,              | 2011 | Annals of thoracic<br>surgery. 2011;<br>92(4):1444-1450                           | non pertinent |
| 5636 | Euctr, P.T.                | 2011 | EU Clinical Trials<br>Register. 2011                                              | non pertinent |
| 5637 | Euctr, I.T.                | 2011 | EU Clinical Trials<br>Register. 2011                                              | non pertinent |
| 5638 | Euctr, D.E.                | 2011 | EU Clinical Trials<br>Register. 2011                                              | non pertinent |
| 5639 | Eric et al.,               | 2011 | Annals of surgery.<br>2011; 253(2):328-<br>335                                    | non pertinent |
| 5640 | Einsiedel et al.,          | 2011 | Zeitschrift fur<br>orthopadie und<br>unfallchirurgie.<br>2011; 149(3):288-<br>295 | non pertinent |
| 5641 | Eichbaum et al.,           | 2011 | BMC Cancer.<br>2011; 11                                                           | non pertinent |
| 5642 | Drks - Meissner            | 2011 | Deutsches<br>Register<br>Klinischer Studien.<br>2011                              | non pertinent |
| 5643 | Drks - Kotchoubey          | 2011 | Deutsches<br>Register<br>Klinischer Studien.<br>2011                              | non pertinent |
| 5644 | Diekhof et al.,            | 2011 | Neuroimage.<br>2011; 54(2):1703-<br>1714                                          | non pertinent |
| 5645 | Dellapina et al.,          | 2011 | Mov Disord. 2011;<br>26(1):153-157                                                | non pertinent |
| 5646 | De Wijkerslooth et<br>al., | 2011 | Gastroenterology.<br>2011; 140(5):409-<br>International j of                      | non pertinent |
| 5647 | Daz-Insa et al.,           | 2011 | neuroscience.<br>2011; 121(12):655-<br>661                                        | non pertinent |
| 5648 | Davis et al.,              | 2011 | J of clinical sleep<br>medicine. 2011;<br>7(6):622-631                            | non pertinent |
| 5649 | Dastidar                   | 2011 | J of thoracic<br>oncology. 2011;<br>6(6):832-833                                  | non pertinent |
| 5650 | Dasilva et al.,            | 2011 | Cephalalgia. 2011;<br>31:41                                                       | non pertinent |
| 5651 | Damush et al.,             | 2011 | Circulation:<br>cardiovascular<br>quality and<br>outcomes. 2011;<br>4(6)          | non pertinent |
| 5652 | Cox et al.,                | 2011 | Vaccine. 2011;<br>29(45):8049-8059                                                | non pertinent |
| 5653 | Cortot et al.,             | 2011 |                                                                                   | non pertinent |
| 5654 | Cong et al.,               | 2011 | Biol Res Nurs.<br>2011; 13(2):204-<br>216                                         | non pertinent |

|      |                     |      |                                                                                |               |
|------|---------------------|------|--------------------------------------------------------------------------------|---------------|
| 5655 | Comstock et al.,    | 2011 | Clinical ophthalmology (auckland, N.Z.). 2011; 5(1):177-186                    | non pertinent |
| 5656 | Coen et al.,        | 2011 | Gastroenterology. 2011; 141(3):909-917.e901                                    | non pertinent |
| 5657 | Christidis et al.,  | 2011 | Rheumatology. 2011; 50:iii32-iii33                                             | non pertinent |
| 5658 | Christensen et al., | 2011 | J of rheumatology. 2011; 38(8):1563-1568                                       | non pertinent |
| 5659 | Chrispijn et al.,   | 2011 | Trials. 2011; 12:246                                                           | non pertinent |
| 5660 | Choi et al.,        | 2011 | Korean j of biological psychiatry. 2011; 18(3):148-158                         | non pertinent |
| 5661 | Chiaretti et al.,   | 2011 | Arch Dis Child. 2011; 96(2):160-163                                            | non pertinent |
| 5662 | Chi, Ctr Trc - Wang | 2011 | Chinese Clinical Trial Registry. 2011                                          | non pertinent |
| 5663 | Chevet et al.,      | 2011 | Annales francaises d'anesthesie ET de reanimation. 2011; 30(1):17-24           | non pertinent |
| 5664 | Cahn et al.,        | 2011 | PLoS One. 2011; 6(8)                                                           | non pertinent |
| 5665 | Cady et al.,        | 2011 | Headache. 2011; 51(7):1078-1086                                                | non pertinent |
| 5666 | Buller              | 2011 | J of thrombosis and haemostasis : JTH. 2011; 9(1):92-99                        | non pertinent |
| 5667 | Budde et al.,       | 2011 | Transplantation. 2011; 92(3):321-327                                           | non pertinent |
| 5668 | Brovold et al.,     | 2011 | European geriatric medicine. 2011; 2:101-102                                   | non pertinent |
| 5669 | Boy et al.,         | 2011 | PLoS One. 2011; 6(8)                                                           | non pertinent |
| 5670 | Borckardt et al.,   | 2011 | Clinical J of Pain. 2011; 27(6):486-494                                        | non pertinent |
| 5671 | Bokov et al.,       | 2011 | Pain Physician. 2011; 14(6):545-557                                            | non pertinent |
| 5672 | Bókkon et al.,      | 2011 | Electromagnetic biology and medicine. 2011; 30(3):115-127                      | non pertinent |
| 5673 | Bohmer et al.,      | 2011 | International j of clinical pharmacology and therapeutics. 2011; 49(7):451-460 | non pertinent |

|      |                     |      |                                                                         |               |
|------|---------------------|------|-------------------------------------------------------------------------|---------------|
| 5674 | Boellaard et al.,   | 2011 | BMC Gastroenterol. 2011; 11:128                                         | non pertinent |
| 5675 | Bø et al.,          | 2011 | Neurology and urodynamics. 2011; 30(6):1104-1105                        | non pertinent |
| 5676 | Bernardini et al.,  | 2011 | Minerva pediatrics. 2011; 63(4):247-255                                 | non pertinent |
| 5677 | Bennell et al.,     | 2011 | Bmj. 2011; 342:d2912                                                    | non pertinent |
| 5678 | Bellapianta et al., | 2011 | Orthopedics. 2011; 34(11):e708-e712                                     | non pertinent |
| 5679 | Beerekamp et al.,   | 2011 | BMC Musculoskelet Disord. 2011; 12:151                                  | non pertinent |
| 5680 | Baxter et al.,      | 2011 | Vaccine. 2011; 29(12):2272-2278                                         | non pertinent |
| 5681 | Bates et al.,       | 2011 | Pharmacotherapy . 2011; 31(11):1092-1110                                | non pertinent |
| 5682 | Bar et al.,         | 2011 | J of clinical psychopharmacology. 2011; 31(1):103-107                   | non pertinent |
| 5683 | Aziz et al.,        | 2011 | International j of clinical pharmacy. 2011; 33(2):150-154               | non pertinent |
| 5684 | Aydeniz et al.,     | 2011 | Turkiye fiziksel tip ve rehabilitasyon dergisi. 2011; 57:254            | non pertinent |
| 5685 | Atack et al.,       | 2011 | J Psychopharmacol. 2011; 25(3):329-344                                  | non pertinent |
| 5686 | Arts et al.,        | 2011 | Eur Spine J. 2011; 20(1):51-57                                          | non pertinent |
| 5687 | Aran et al.,        | 2011 | Clinical and experimental rheumatology. 2011; 29(3):513-518             | non pertinent |
| 5688 | Anderson et al.,    | 2011 | American j of obstetrics and gynecology. 2011; 204(3):267.e261-267.e263 | non pertinent |
| 5689 | Aminabadi et al.,   | 2011 | J Clin Pediatr Dent. 2011; 36(2):127-132                                | non pertinent |
| 5690 | Alvarez et al.,     | 2011 | Annals of hepatology. 2011; 10(4):458-468                               | non pertinent |
| 5691 | Alphs et al.,       | 2011 | Annals of general psychiatry. 2011; 10                                  | non pertinent |
| 5692 | Ali et al.,         | 2011 | Cancers. 2011; 3(2):1593-1604                                           | non pertinent |

|      |                  |      |                                                                                          |               |
|------|------------------|------|------------------------------------------------------------------------------------------|---------------|
| 5693 | Alegre et al.,   | 2011 | Rheumatology. 2011; 50:iii87                                                             | non pertinent |
| 5694 | Alberto et al.,  | 2011 | Archives of orthopaedic and trauma surgery. 2011; 131(12):1677-1685                      | non pertinent |
| 5695 | Aikins et al.,   | 2011 | Psychiatry Res. 2011; 188(3):453-455                                                     | non pertinent |
| 5696 | Ahn et al.,      | 2011 | J Acupunct Meridian Stud. 2011; 4(1):29-43                                               | non pertinent |
| 5697 | Adenauer et al., | 2011 | BMC Neurosci. 2011; 12:127                                                               | non pertinent |
| 5698 | Actrn - ?        | 2011 | Australian New Zealand Clinical Trials Registry. 2011                                    | non pertinent |
| 5699 | Actrn - ?        | 2011 | Australian New Zealand Clinical Trials Registry. 2011                                    | non pertinent |
| 5700 | Actrn - ?        | 2011 | Australian New Zealand Clinical Trials Registry. 2011                                    | non pertinent |
| 5701 | Lawrence et al., | 2011 | Clinical orthopaedics and related research. 2011; 469(12):3522-3526                      | non pertinent |
| 5702 | Zyloney et al.,  | 2010 | Mol Pain. 2010; 6:80                                                                     | non pertinent |
| 5703 | Zink et al.,     | 2010 | J Neurosci. 2010; 30(20):7017-7022                                                       | non pertinent |
| 5704 | Zeng et al.,     | 2010 | J of clinical rehabilitative tissue engineering research. 2010; 14(33):6117-6120         | non pertinent |
| 5705 | Yin et al.,      | 2010 | British j of dermatology. 2010; 163(5):1064-1071                                         | non pertinent |
| 5706 | Yang et al.,     | 2010 | European j of integrative medicine. 2010; 2(4):190                                       | non pertinent |
| 5707 | Xiong et al.,    | 2010 | Nan fang yi ke da xue xue bao (J of Southern Medical University). 2010; 30(11):2558-2561 | non pertinent |
| 5708 | Wigal et al.,    | 2010 | Postgraduate medicine. 2011; 122(5):27-34                                                | non pertinent |
| 5709 | Wiech et al.,    | 2010 | J Neurosci. 2010; 30(48):16324-16331                                                     | non pertinent |

|      |                     |      |                                                                   |               |
|------|---------------------|------|-------------------------------------------------------------------|---------------|
| 5710 | Wesnes et al.,      | 2010 | J of psychopharmacology (Oxford, England). 2010; 24(11):1659-1669 | non pertinent |
| 5711 | Wallace et al.,     | 2010 | Regional anesthesia and pain medicine. 2010; 35(6):507-513        | non pertinent |
| 5712 | Van Peer et al.,    | 2010 | Psychoneuroendocrinology. 2010; 35(1):21-32                       | non pertinent |
| 5713 | Upadhyay et al.,    | 2010 | Brain. 2010; 133(Pt 7):2098-2114                                  | non pertinent |
| 5714 | Tullo et al.,       | 2010 | Neurological sciences. 2010; 31(SUPPL 1):51-54                    | non pertinent |
| 5715 | Tomas et al.,       | 2010 | Hip international. 2010; 20(3):314-319                            | non pertinent |
| 5716 | Toll et al.,        | 2010 | Drug Alcohol Depend. 2010; 111(3):200-206                         | non pertinent |
| 5717 | Theiss et al.,      | 2010 | International j of cardiology. 2010; 145(2):282-284               | non pertinent |
| 5718 | Tan et al.,         | 2010 | J Burn Care Res. 2010; 31(4):590-597                              | non pertinent |
| 5719 | Tan et al.,         | 2010 | Clinical and experimental dermatology. 2010; 35(4):e109-e112      | non pertinent |
| 5720 | Tabbert et al.,     | 2010 | Neurobiol Learn Mem. 2010; 94(3):392-401                          | non pertinent |
| 5721 | Sykora              | 2010 | Farmaceuticky obzor. 2010; 79(11-12):330-337                      | non pertinent |
| 5722 | Svensson et al.,    | 2010 | Acta Radiol. 2010; 51(7):722-726                                  | non pertinent |
| 5723 | Suris et al.,       | 2010 | Annals of clinical psychiatry. 2010; 22(4):274-279                | non pertinent |
| 5724 | Strigo et al.,      | 2010 | PLoS One. 2010; 5(11):e15093                                      | non pertinent |
| 5725 | Steinmiller et al., | 2010 | Exp Clin Psychopharmacol. 2010; 18(3):277-283                     | non pertinent |
| 5726 | Spitzer et al.,     | 2010 | Physician and sportsmedicine. 2010; 38(2):35-47                   | non pertinent |
| 5727 | Solanki et al.,     | 2010 | European j of anaesthesiology. 2010; 27(8):708-713                | non pertinent |

|      |                   |      |                                                                                |               |
|------|-------------------|------|--------------------------------------------------------------------------------|---------------|
| 5728 | Slomovitz et al., | 2010 | Cancer. 2010; 116(23):5415-5419                                                | non pertinent |
| 5729 | Slater et al.,    | 2010 | Lancet. 2010; 376(9748):1225-1232                                              | non pertinent |
| 5730 | Sjogaard et al.,  | 2010 | Eur J Appl Physiol. 2010; 108(4):657-669                                       | non pertinent |
| 5731 | Sitges et al.,    | 2010 | International J of Psychophysiology. 2010; 77(2):176-183                       | non pertinent |
| 5732 | Simon et al.,     | 2010 | CNS spectrums. 2010; 15(7):436-443                                             | non pertinent |
| 5733 | Sheftell et al.,  | 2010 | Cephalalgia. 2010; 30(7):838-846                                               | non pertinent |
| 5734 | Shaw et al.,      | 2010 | Health technology assessment (Winchester, England). 2010; 14(26):1-113, iii-iv | non pertinent |
| 5735 | Scrivani et al.,  | 2010 | Pain medicine (Malden, Mass.). 2010; 11(6):920-941                             | non pertinent |
| 5736 | Schulz et al.,    | 2010 | J of child and adolescent psychopharmacology. 2010; 20(5):377-385              | non pertinent |
| 5737 | Schoffski et al., | 2010 | Eur J Cancer. 2010; 46(12):2206-2215                                           | non pertinent |
| 5738 | Schoell et al.,   | 2010 | PLoS One. 2010; 5(8):e12344                                                    | non pertinent |
| 5739 | Saracco et al.,   | 2010 | Neurological sciences. 2010; 31 Suppl 1:179-180                                | non pertinent |
| 5740 | Sandsjo et al.,   | 2010 | J Telemed Telecare. 2010; 16(6):329-335                                        | non pertinent |
| 5741 | Salman et al.,    | 2010 | Antimicrobial agents and chemotherapy. 2010; 54(1):360-366                     | non pertinent |
| 5742 | Sai et al.,       | 2010 | J of gastroenterology. 2010; 45(3):335-341                                     | non pertinent |
| 5743 | Ryoo et al.,      | 2010 | Clinical psychopharmacology and neuroscience. 2010; 8(1):30-37                 | non pertinent |
| 5744 | Rutkowski et al., | 2010 | J Oral Implantol. 2010; 36(1):11-23                                            | non pertinent |
| 5745 | Rosenberg et al., | 2010 | Expert opinion on drug safety. 2010; 9(4):573-592                              | non pertinent |

|      |                          |      |                                                                                                          |               |
|------|--------------------------|------|----------------------------------------------------------------------------------------------------------|---------------|
| 5746 | Rogers et al.,           | 2010 | Diabetologia. 2010; 53:236-237                                                                           | non pertinent |
| 5747 | Roessing et al.,         | 2010 | Conference: 9th world congress of the international cartilage repair society. Spain 1(2 Supplement 1):55 | non pertinent |
| 5748 | Rodriguez-Raecke et al., | 2010 | J Neurosci. 2010; 30(34):11363-11368                                                                     | non pertinent |
| 5749 | Riegel et al.,           | 2010 | Am Heart J. 2010; 159(3):392-398                                                                         | non pertinent |
| 5750 | Rawlings et al.,         | 2010 | Psychopharmacology (Berl). 2010; 212(4):625-634                                                          | non pertinent |
| 5751 | Rasetti et al.,          | 2010 | Neuropsychopharmacology. 2010; 35(10):2101-2109                                                          | non pertinent |
| 5752 | Rao et al.,              | 2010 | Gastroenterology. 2010; 139(5):1549-1558                                                                 | non pertinent |
| 5753 | Rakesh et al.,           | 2010 | Pharmacologyonline. 2010; 1:458-468                                                                      | non pertinent |
| 5754 | Pruegsanusak et al.,     | 2010 | J Med Assoc Thai. 2010; 93(5):558-565                                                                    | non pertinent |
| 5755 | Pouga et al.,            | 2010 | Hum Brain Mapp. 2010; 31(10):1469-1481                                                                   | non pertinent |
| 5756 | Portenoy et al.,         | 2010 | Pain. 2010; 151(3):617-624                                                                               | non pertinent |
| 5757 | Pogatzki-Zahn et al.,    | 2010 | Anesthesiology. 2010; 112(2):406-417                                                                     | non pertinent |
| 5758 | Pettilä et al.,          | 2010 | Clinical care (london, england). 2010; 14(4):R139                                                        | non pertinent |
| 5759 | Perkins et al.,          | 2010 | Biology of blood and marrow transplantation. 2010; 16(7):937-947                                         | non pertinent |
| 5760 | Patella et al.,          | 2010 | Cartilage. 2010; 1(2):147-155                                                                            | non pertinent |
| 5761 | Orlando et al.,          | 2010 | Clinical and experimental gastroenterology. 2010; 3(1):117-125                                           | non pertinent |
| 5762 | Ogawa et al.,            | 2010 | Japanese j of anesthesiology. 2010; 59(8):961-970                                                        | non pertinent |
| 5763 | Ntr - Verkalk            | 2010 | Netherlands Trial Register. 2010                                                                         | non pertinent |
| 5764 | Ntr – Dahan              | 2010 | Netherlands Trial Register. 2010                                                                         | non pertinent |
| 5765 | Nir et al.,              | 2010 | Brain Res. 2010; 1344:77-86                                                                              | non pertinent |
| 5766 | Nikzad et al.,           | 2010 | J Oral Maxillofac Surg. 2010; 68(6):1353-1359                                                            | non pertinent |

|      |                         |      |                                                                  |               |
|------|-------------------------|------|------------------------------------------------------------------|---------------|
| 5767 | Nicolini et al.,        | 2010 | Clinical lymphoma, myeloma & leukemia. 2010; 10(5):394-399       | non pertinent |
| 5768 | Ni et al.,              | 2010 | Chang gung medical j. 2010; 33(4):443-452                        | non pertinent |
| 5769 | Ng et al.,              | 2010 | Asia-pacific psychiatry. 2010; 2(3):A21-A22                      | non pertinent |
| 5770 | Ng et al.,              | 2010 | Acta radiologica (stockholm, sweden : 1987). 2010; 51(4):368-374 | non pertinent |
| 5771 | Nct – Pape              | 2010 | National Library of Medicine. 2010                               | non pertinent |
| 5772 | Nct - David             | 2010 | National Library of Medicine. 2010                               | non pertinent |
| 5773 | Nct - Sharar            | 2010 | National Library of Medicine. 2010                               | non pertinent |
| 5774 | Nct – Peretti           | 2010 | National Library of Medicine. 2010                               | non pertinent |
| 5775 | Nct – Meredith          | 2010 | National Library of Medicine. 2010                               | non pertinent |
| 5776 | Nct – Datta             | 2010 | National Library of Medicine. 2010                               | non pertinent |
| 5777 | Nct – Hargrove          | 2010 | National Library of Medicine. 2010                               | non pertinent |
| 5778 | Nct – Brunet            | 2010 | Am J Psychiatry. 2018 May; 175(5):427-433                        | non pertinent |
| 5779 | Nct – Olthuis           | 2010 | National Library of Medicine. 2010                               | non pertinent |
| 5780 | Nct – Weck              | 2010 | National Library of Medicine. 2010                               | non pertinent |
| 5781 | Nct – Brill             | 2010 | National Library of Medicine. 2010                               | non pertinent |
| 5782 | Nct – Davidson          | 2010 | National Library of Medicine. 2010                               | non pertinent |
| 5783 | Mustafah Khwaja et al., | 2010 | Canadian j of emergency medicine. 2010; 12(1):39-44              | non pertinent |
| 5784 | Muller et al.,          | 2010 | Arch Orthop Trauma Surg. 2010; 130(7):927-935                    | non pertinent |
| 5785 | Morin et al.,           | 2010 | Regional anesthesia and pain medicine. 2010; 35(2):194-199       | non pertinent |
| 5786 | Miskowiak et al.,       | 2010 | Psychopharmacol ogy. 2010; 210(3):419-428                        | non pertinent |
| 5787 | Mhuirheartaigh et al.,  | 2010 | J Neurosci. 2010; 30(27):9095-9102                               | non pertinent |
| 5788 | Merz et al.,            | 2010 | Psychoneuroendo crinology. 2010; 35(1):33-46                     | non pertinent |
| 5789 | Mehta et al.,           | 2010 | J of perinatology. 2010; 30(11):731-735                          | non pertinent |



|      |                           |      |                                                              |               |
|------|---------------------------|------|--------------------------------------------------------------|---------------|
| 5790 | Martinez-Sandoval et al., | 2010 | J of travel medicine. 2010; 17(2):111-117                    | non pertinent |
| 5791 | Marmotti et al.,          | 2010 | Haematologica. 2010; 95:121                                  | non pertinent |
| 5792 | Marini et al.,            | 2010 | Clinical J of Pain. 2010; 26(7):611-616                      | non pertinent |
| 5793 | Man et al.,               | 2010 | Hong kong j of emergency medicine. 2010; 17(2):126-131       | non pertinent |
| 5794 | Lyubkin et al.,           | 2010 | Depress Anxiety. 2010; 27(11):1011-1016                      | non pertinent |
| 5795 | Lundström et al.,         | 2010 | International J of Psychophysiology. 2010; 78(2):179-189     | non pertinent |
| 5796 | Lundborg et al.,          | 2010 | Diabetic medicine. 2010; 27(7):823-829                       | non pertinent |
| 5797 | Lu et al.,                | 2010 | Pain. 2010; 148(1):75-83                                     | non pertinent |
| 5798 | Lu et al.,                | 2010 | J Formos Med Assoc. 2010; 109(8):589-595                     | non pertinent |
| 5799 | Litt et al.,              | 2010 | Pain. 2010; 151(1):110-116                                   | non pertinent |
| 5800 | Lindeboom et al.,         | 2010 | Clin Oral Implants Res. 2010; 21(4):366-370                  | non pertinent |
| 5801 | Leslie et al.,            | 2010 | Anesth Analg. 2010; 110(3):823-828                           | non pertinent |
| 5802 | Leppert et al.,           | 2010 | International j of clinical practice. 2010; 64(12):1681-1687 | non pertinent |
| 5803 | Lemmens et al.,           | 2010 | BMC anesthesiology. 2010; 10:15<br>TN:NCT00473694            | non pertinent |
| 5804 | Leistritz et al.,         | 2010 | Methods Inf Med. 2010; 49(5):484-491                         | non pertinent |
| 5805 | Lee et al.,               | 2010 | Korean j of anesthesiology. 2010; 58(6):537-541              | non pertinent |
| 5806 | Lauta et al.,             | 2010 | J Neurosurg Anesthesiol. 2010; 22(2):110-118                 | non pertinent |
| 5807 | Laudon et al.,            | 2010 | Mayo clinic proceedings. 2010; 85(4):314-322                 | non pertinent |
| 5808 | Laretzaki et al.,         | 2010 | J Psychopharmacol. 2010; 24(5):667-675                       | non pertinent |
| 5809 | Labuschagne et al.,       | 2010 | Neuropsychopharmacology. 2010; 35(12):2403-2413              | non pertinent |

|      |                                    |      |                                                        |               |
|------|------------------------------------|------|--------------------------------------------------------|---------------|
| 5810 | Kojuri et al.,                     | 2010 | Cardiovasc Ther.<br>2010; 28(3):147-152                | non pertinent |
| 5811 | Knittle et al.,                    | 2010 | Arthritis care & research. 2010; 62(10):1460-1472      | non pertinent |
| 5812 | Keiser et al.,                     | 2010 | Vaccine. 2010; 28(43):6970-6976                        | non pertinent |
| 5813 | Kayiran et al.,                    | 2010 | Appl Psychophysiol Biofeedback. 2010; 35(4):293-302    | non pertinent |
| 5814 | Jprn, Umin - ?                     | 2010 | Japan Primary Registries Network. 2010                 | non pertinent |
| 5815 | Jprn, Umin - ?                     | 2010 | Japan Primary Registries Network. 2010                 | non pertinent |
| 5816 | Jensen et al.,                     | 2010 | European j of integrative medicine. 2010; 2(4):195-196 | non pertinent |
| 5817 | Jensch et al.,                     | 2010 | Eur Radiol. 2010; 20(1):146-156                        | non pertinent |
| 5818 | Jain et al.,                       | 2010 | Paediatr Anaesth. 2010; 20(4):330-337                  | non pertinent |
| 5819 | Isrctn - Marsh                     | 2010 | ISRCTN Registry. 2010                                  | non pertinent |
| 5820 | Isrctn - Friesem                   | 2010 | ISRCTN Registry. 2010                                  | non pertinent |
| 5821 | Isrctn - Hawley                    | 2010 | ISRCTN Registry. 2010                                  | non pertinent |
| 5822 | Isrctn - Aram                      | 2010 | ISRCTN Registry. 2010                                  | non pertinent |
| 5823 | Isrctn - Renton                    | 2010 | ISRCTN Registry. 2010                                  | non pertinent |
| 5824 | Irct138807192573<br>N - Moradveisi | 2010 | Iranian Registry Clinical Trials. 2010                 | non pertinent |
| 5825 | Irct138711151637<br>N - Kahrizi    | 2010 | Iranian Registry Clinical Trials. 2010                 | non pertinent |
| 5826 | Illman et al.,                     | 2010 | J Clin Monit Comput. 2010; 24(5):371-376               | non pertinent |
| 5827 | Hurley et al.,                     | 2010 | BMC musculoskeletal disorders. 2010; 11:70             | non pertinent |
| 5828 | Hurlemann et al.,                  | 2010 | Psychol Med. 2010; 40(11):1839-1848                    | non pertinent |
| 5829 | Ho et al.,                         | 2010 | Br J Anaesth. 2010; 105(3):371-376                     | non pertinent |
| 5830 | Henckens et al.,                   | 2010 | J of neuroscience. 2010; 30(38):12725-12732            | non pertinent |
| 5831 | Heldestad et al.,                  | 2010 | Clin Neurophysiol. 2010; 121(11):1878-1885             | non pertinent |

|      |                      |      |                                                                                                                        |               |
|------|----------------------|------|------------------------------------------------------------------------------------------------------------------------|---------------|
| 5832 | Hegarty et al.,      | 2010 | BMC Public Health. 2010; 10:2                                                                                          | non pertinent |
| 5833 | Hartmann et al.,     | 2010 | Alimentary pharmacology & therapeutics. 2010; 32(3):368-376                                                            | non pertinent |
| 5834 | Gustin et al.,       | 2010 | Pain. 2010; 151(1):69-76                                                                                               | non pertinent |
| 5835 | Goren et al.,        | 2010 | Clinical rehabilitation. 2010; 24(7):623-631                                                                           | non pertinent |
| 5836 | Gobbi                | 2010 | Cartilage. Conference: 9th world congress of the international cartilage repair society. Spain 1(2 Supplement 1):23-26 | non pertinent |
| 5837 | Gierthmuhlen et al., | 2010 | Mov Disord. 2010; 25(9):1195-1202                                                                                      | non pertinent |
| 5838 | Garcia-Leal et al.,  | 2010 | J Psychopharmacol. 2010; 24(5):683-694                                                                                 | non pertinent |
| 5839 | Fusar-Poli et al.,   | 2010 | The international j of neuropsychopharmacology. 2010; 13(4):421-432                                                    | non pertinent |
| 5840 | Frohman et al.,      | 2010 | Therapeutic advances in neurological disorders. 2010; 3(1):15-28                                                       | non pertinent |
| 5841 | Freund et al.,       | 2010 | Clin J Pain. 2010; 26(4):339-347                                                                                       | non pertinent |
| 5842 | Foster et al.,       | 2010 | BMC Musculoskelet Disord. 2010; 11:186                                                                                 | non pertinent |
| 5843 | Fontaine et al.,     | 2010 | J of headache and pain. 2010; 11(1):23-31                                                                              | non pertinent |
| 5844 | Eun et al.,          | 2010 | Laryngoscope. 2010; 120(11):2189-2192                                                                                  | non pertinent |
| 5845 | Euctr, S.E.          | 2010 | EU Clinical Trials Register. 2010                                                                                      | non pertinent |
| 5846 | Euctr, L.T.          | 2010 | EU Clinical Trials Register. 2010                                                                                      | non pertinent |
| 5847 | Euctr, G.B.          | 2010 | EU Clinical Trials Register. 2010                                                                                      | non pertinent |
| 5848 | Euctr, F.R.          | 2010 | EU Clinical Trials Register. 2010                                                                                      | non pertinent |
| 5849 | Erhart et al.,       | 2010 | J Orthop Res. 2010; 28(7):873-879                                                                                      | non pertinent |
| 5850 | Ellis et al.,        | 2010 | PLoS One. 2010; 5(1):1-9                                                                                               | non pertinent |

|      |                            |      |                                                                                                                                                                                                               |               |
|------|----------------------------|------|---------------------------------------------------------------------------------------------------------------------------------------------------------------------------------------------------------------|---------------|
| 5851 | Ellerkmann et al.,         | 2010 | Anaesth Intensive Care. 2010; 38(1):159-166                                                                                                                                                                   | non pertinent |
| 5852 | Elhawary et al.,           | 2010 | Spine j. conference: 25th Annual Meeting of the North American Spine Society. NASS Miami, FL United States. Conference Start: 20101005. Conference End: 20101009. Conference Publication:(10:(9 SUPPL 1)):130 | non pertinent |
| 5853 | Ebert et al.,              | 2010 | Cartilage. 2010; 1(2):51-                                                                                                                                                                                     | non pertinent |
| 5854 | Dulko et al.,              | 2010 | J Am Acad Nurse Pract. 2010; 22(1):45-55                                                                                                                                                                      | non pertinent |
| 5855 | Drescher et al.,           | 2010 | Headache. 2010; 50(8):1328-1334                                                                                                                                                                               | non pertinent |
| 5856 | Distler et al.,            | 2010 | Arthritis Rheum. 2010; 62(1):291-300                                                                                                                                                                          | non pertinent |
| 5857 | Dewall et al.,             | 2010 | Psychological science. 2010; 21(7):931-937                                                                                                                                                                    | non pertinent |
| 5858 | Denegar et al.,            | 2010 | Clin Interv Aging. 2010; 5:199-206                                                                                                                                                                            | non pertinent |
| 5859 | Demirtas-Tatlidede et al., | 2010 | Schizophr Res. 2010; 124(1-3):91-100                                                                                                                                                                          | non pertinent |
| 5860 | Delmastro et al.,          | 2010 | Neurourology and urodynamics. 2010; 29:62-63                                                                                                                                                                  | non pertinent |
| 5861 | De Boer et al.,            | 2010 | Osteoarthritis and cartilage. 2010; 18:145-                                                                                                                                                                   | non pertinent |
| 5862 | Daya et al.,               | 2010 | J Sleep Res. 2010; 19(2):317-322                                                                                                                                                                              | non pertinent |
| 5863 | Davies et al.,             | 2010 | Current drug therapy. 2010; 5(2):118-121                                                                                                                                                                      | non pertinent |
| 5864 | Daly et al.,               | 2010 | Psychopharmacol ogy. 2010; 210(4):499-510                                                                                                                                                                     | non pertinent |
| 5865 | Cutshall et al.,           | 2010 | Complement Ther Clin Pract. 2010; 16(2):92-95                                                                                                                                                                 | non pertinent |
| 5866 | Coslett et al.,            | 2010 | J Int Neuropsychol Soc. 2010; 16(4):603-612                                                                                                                                                                   | non pertinent |
| 5867 | Cosgrove et al.,           | 2010 | Nicotine Tob Res. 2010; 12(5):535-539                                                                                                                                                                         | non pertinent |
| 5868 | Cockayne                   | 2010 | Trials. 2010; 11:12                                                                                                                                                                                           | non pertinent |

|      |                          |      |                                                                       |               |
|------|--------------------------|------|-----------------------------------------------------------------------|---------------|
| 5869 | Chua                     | 2010 | Annals of the academy of medicine singapore. 2010; 39(11 SUPPL 1):338 | non pertinent |
| 5870 | Chu et al.,              | 2010 | Chinese j of integrative medicine. 2010; 16(5):399-405                | non pertinent |
| 5871 | Cho et al.,              | 2010 | Acta Anaesthesiol Scand. 2010; 54(4):453-457                          | non pertinent |
| 5872 | Chiarioni et al.,        | 2010 | Digestive and liver disease. 2010; 42:119-                            | non pertinent |
| 5873 | Chen et al.,             | 2010 | Pain management nursing. 2010; 11(3):159-168                          | non pertinent |
| 5874 | Chen et al.,             | 2010 | International j of clinical practice. 2010; 64(11):1530-1534          | non pertinent |
| 5875 | Celik et al.,            | 2010 | J Spinal Disord Tech. 2010; 23(4):229-235                             | non pertinent |
| 5876 | Carter et al.,           | 2010 | CNS Drugs. 2010; 24(4):337-361                                        | non pertinent |
| 5877 | Carmona et al.,          | 2010 | Vaccine. 2010; 28(36):5837-5844                                       | non pertinent |
| 5878 | Cahill et al.,           | 2010 | Current opinion in obstetrics & gynecology. 2010; 22(2):122-127       | non pertinent |
| 5879 | Büttner et al.,          | 2010 | Der Anaesthesist. 2010; 59(2):126-134                                 | non pertinent |
| 5880 | Briggs et al.,           | 2010 | Pain Physician. 2010; 13(6):E347-E355                                 | non pertinent |
| 5881 | Brander et al.,          | 2010 | Pm r. 2010; 2(4):259-267                                              | non pertinent |
| 5882 | Boudreau et al.,         | 2010 | J of oral rehabilitation. 2010; 37(9):704-718                         | non pertinent |
| 5883 | Borhani Haghighi et al., | 2010 | International j of clinical practice. 2010; 64(4):451-456             | non pertinent |
| 5884 | Bollens et al.,          | 2010 | Annals of physical and rehabilitation medicine. 2010; 53:e177-        | non pertinent |
| 5885 | Bhattacharyya et al.,    | 2010 | Neuropsychopharmacology. 2010; 35(3):764-774                          | non pertinent |
| 5886 | Belavy et al.,           | 2010 | J Appl Physiol (1985). 2010; 109(6):1801-1811                         | non pertinent |
| 5887 | Baygin et al.,           | 2010 | Eur J Anaesthesiol. 2010; 27(4):341-346                               | non pertinent |

|      |                  |      |                                                                    |               |
|------|------------------|------|--------------------------------------------------------------------|---------------|
| 5888 | Aronson et al.,  | 2010 | Plos neglected tropical diseases. 2010; 4(3):e628<br>BMC           | non pertinent |
| 5889 | Apfel et al.,    | 2010 | musculoskeletal disorders. 2010; 11:155                            | non pertinent |
| 5890 | Aoki et al.,     | 2010 | Internal medicine (Tokyo, Japan). 2010; 49(12):1085-1087           | non pertinent |
| 5891 | Anderson et al., | 2010 | Clinical nurse specialist CNS. 2010; 24(3):140-148                 | non pertinent |
| 5892 | Andersen et al., | 2010 | Eur Spine J. 2010; 19(12):2200-2208                                | non pertinent |
| 5893 | Aide et al.,     | 2010 | PLoS One. 2010; 5(11):e13838                                       | non pertinent |
| 5894 | Adolph et al.,   | 2010 | Neuroimage. 2010; 49(1):720-730                                    | non pertinent |
| 5895 | Aderjan et al.,  | 2010 | Pain. 2010; 151(1):97-103                                          | non pertinent |
| 5896 | Actrn – Zacharin | 2010 | Australian New Zealand Clinical Trials Registry. 2010              | non pertinent |
| 5897 | Actrn - Clanchy  | 2010 | Australian New Zealand Clinical Trials Registry. 2010              | non pertinent |
| 5898 | Simon et al.,    | 2010 | CNS spectrums. 2010; 15(7):436-443                                 | non pertinent |
| 5899 | J of neurology   | 2010 | J of neurology. 2010; 257                                          | non pertinent |
| 5900 | Zeni et al.,     | 2009 | J of child and adolescent psychopharmacol ogy. 2009; 19(5):553-561 | non pertinent |
| 5901 | Yu et al.,       | 2009 | Int J Nurs Stud. 2009; 46(11):1423-1430<br>BMC                     | non pertinent |
| 5902 | York et al.,     | 2009 | complementary and alternative medicine. 2009; 9:10                 | non pertinent |
| 5903 | Yen et al.,      | 2009 | J Clin Neurosci. 2009; 16(2):214-219                               | non pertinent |
| 5904 | Xu et al.,       | 2009 | Anesth Analg. 2009; 108(2):478-483                                 | non pertinent |
| 5905 | Wu et al.,       | 2009 | Zhonghua yi xue za zhi. 2009; 89(5):314-317                        | non pertinent |
| 5906 | Wosko et al.,    | 2009 | Anestezjologia intensywna terapia. 2009; 41(1):22-27               | non pertinent |

|      |                     |      |                                                                   |               |
|------|---------------------|------|-------------------------------------------------------------------|---------------|
|      |                     |      | Int J                                                             |               |
| 5907 | Watson et al.,      | 2009 | Neuropsychopharmacol. 2009; 12(3):357-370                         | non pertinent |
| 5908 | Wang et al.,        | 2009 | Soc Cogn Affect Neurosci. 2009; 4(4):357-368                      | non pertinent |
| 5909 | Wang et al.,        | 2009 | Acute pain. 2009; 11(2):43-50                                     | non pertinent |
| 5910 | Wang et al.,        | 2009 | Anesthesiology. 2009; 111(4):871-880                              | non pertinent |
| 5911 | Wang et al.,        | 2009 | Biological psychiatry. 2009; 66(5):516-521                        | non pertinent |
| 5912 | Walker et al.,      | 2009 | Pain. 2009; 141(1-2):79-87                                        | non pertinent |
| 5913 | Walch et al.,       | 2009 | Orthop Traumatol Surg Res. 2009; 95(7):463-470                    | non pertinent |
| 5914 | Von Delius et al.,  | 2009 | Am J Gastroenterol. 2009; 104(2):318-325                          | non pertinent |
| 5915 | Vidailhet et al.,   | 2009 | Lancet Neurol. 2009; 8(8):709-717                                 | non pertinent |
| 5916 | Veldhuijzen et al., | 2009 | Pain. 2009; 141(1-2):104-113                                      | non pertinent |
| 5917 | Van Wingen et al.,  | 2009 | Neuropsychopharmacology. 2009; 34(3):539-547                      | non pertinent |
| 5918 | Vaid et al.,        | 2009 | Archives of gynecology and obstetrics. 2009; 280(6):893-897       | non pertinent |
| 5919 | Tuveson et al.,     | 2009 | Pain. 2009; 143(1-2):84-91                                        | non pertinent |
| 5920 | Tripathi et al.,    | 2009 | Annals of cardiac anaesthesia. 2009; 12(1):34-39                  | non pertinent |
| 5921 | Tan et al.,         | 2009 | Anaesth Intensive Care. 2009; 37(5):807-814                       | non pertinent |
| 5922 | Takahashi et al.,   | 2009 | J of child and adolescent psychopharmacology. 2009; 19(4):341-350 | non pertinent |
| 5923 | Svanborg et al.,    | 2009 | European child & adolescent psychiatry. 2009; 18(12):725-735      | non pertinent |
| 5924 | Suzuki et al.,      | 2009 | Japanese j of chemotherapy. 2009; 57(SUPPL 1):167-185             | non pertinent |
| 5925 | Su et al.,          | 2009 | BJOG. 2009; 116(11):1461-1466                                     | non pertinent |
| 5926 | Smeets et al.,      | 2009 | Eur J Pain. 2009; 13(1):71-81                                     | non pertinent |
| 5927 | Sissoko et al.,     | 2009 | PLoS One. 2009; 4(10):e6732                                       | non pertinent |
| 5928 | Silberstein et al., | 2009 | Headache. 2009; 49(8):1153-1162                                   | non pertinent |

|      |                    |      |                                                                                   |               |
|------|--------------------|------|-----------------------------------------------------------------------------------|---------------|
| 5929 | Sikand et al.,     | 2009 | Pain. 2009; 144(1-2):66-75                                                        | non pertinent |
| 5930 | Shen et al.,       | 2009 | Medical acupuncture. 2009; 21(4):263-268                                          | non pertinent |
| 5931 | Schumacher et al., | 2009 | Anesthesiology. 2009; 111(4):790-804                                              | non pertinent |
| 5932 | Scheller et al.,   | 2009 | Anesthesiology. 2009; 111(2):340-355                                              | non pertinent |
| 5933 | Schanz et al.,     | 2009 | JDDG – j of the german society of dermatology. 2009; 7(12):1055-1059              | non pertinent |
| 5934 | Saps et al.,       | 2009 | J of pediatric gastroenterology and nutrition. 2009; 48(SUPPL 2):101-103          | non pertinent |
| 5935 | Santa Ana et al.,  | 2009 | Drug Alcohol Depend. 2009; 104(3):220-227                                         | non pertinent |
| 5936 | Samangaya et al.,  | 2009 | Hypertension in pregnancy. 2009; 28(4):369-382                                    | non pertinent |
| 5937 | Sallee et al.,     | 2009 | J of the American Academy of Child and Adolescent Psychiatry. 2009; 48(2):155-165 | non pertinent |
| 5938 | Sagara et al.,     | 2009 | Malaria j. 2009; 8:63                                                             | non pertinent |
| 5939 | Roy et al.,        | 2009 | Proc Natl Acad Sci U S A. 2009; 106(49):20900-20905                               | non pertinent |
| 5940 | Roth et al.,       | 2009 | Primary care companion to the j of clinical psychiatry. 2009; 11(6):292-301       | non pertinent |
| 5941 | Raynauld et al.,   | 2009 | Ann Rheum Dis. 2009; 68(6):938-947                                                | non pertinent |
| 5942 | Raynauld et al.,   | 2009 | Osteoarthritis and cartilage. 2009; 17:176-                                       | non pertinent |
| 5943 | Radpay et al.,     | 2009 | Tanaffos. 2009; 8(3):51-57                                                        | non pertinent |
| 5944 | Raddi et al.,      | 2009 | Archives of medical science. 2009; 5(1):57-62                                     | non pertinent |
| 5945 | Puttini et al.,    | 2009 | European j of pain (London, England). 2009; 13:5-6                                | non pertinent |
| 5946 | Poreisz et al.,    | 2009 | BMC Neurosci. 2009; 10:54                                                         | non pertinent |



|      |                           |      |                                                                     |               |
|------|---------------------------|------|---------------------------------------------------------------------|---------------|
| 5947 | Philip et al.,            | 2009 | J of allergy and clinical immunology. 2009; 124(5):942-948.e941-949 | non pertinent |
| 5948 | Petrucchi et al.,         | 2009 | J of cardiovascular electrophysiology. 2009; 20(3):299-306          | non pertinent |
| 5949 | Perkins et al.,           | 2009 | J Neurosci. 2009; 29(40):12617-12624                                | non pertinent |
| 5950 | Perez-Palomares et al.,   | 2009 | BMC musculoskeletal disorders. 2009; 10:92                          | non pertinent |
| 5951 | Park et al.,              | 2009 | J of endourology / Endourological Society. 2009; 23(11):1913-1917   | non pertinent |
| 5952 | Padmanabhan et al.,       | 2009 | Anesth Analg. 2009; 109(5):1448-1455                                | non pertinent |
| 5953 | Ortega et al.,            | 2009 | Exercise immunology review. 2009; 15:42-65                          | non pertinent |
| 5954 | Onur et al.,              | 2009 | Soc Cogn Affect Neurosci. 2009; 4(2):119-126                        | non pertinent |
| 5955 | Ohtori et al.,            | 2009 | J of Pain. 2009; 10(8):870-875                                      | non pertinent |
| 5956 | Ogutu et al.,             | 2009 | PLoS One. 2009; 4(3):e4708                                          | non pertinent |
| 5957 | Nutt et al.,              | 2009 | J of psychopharmacology (Oxford, England). 2009; 23(8):867-873      | non pertinent |
| 5958 | Ndiaye et al.,            | 2009 | Malaria j. 2009; 8:125                                              | non pertinent |
| 5959 | Nct – Abrahão             | 2009 | National Library of Medicine. 2009                                  | non pertinent |
| 5960 | Nct – MFox                | 2009 | National Library of Medicine. 2009                                  | non pertinent |
| 5961 | Nct – Olivo               | 2009 | National Library of Medicine. 2009                                  | non pertinent |
| 5962 | Nct – Chu                 | 2009 | National Library of Medicine. 2009                                  | non pertinent |
| 5963 | Nct – Froelich            | 2009 | National Library of Medicine. 2009                                  | non pertinent |
| 5964 | Nct – Skouen              | 2009 | National Library of Medicine. 2009                                  | non pertinent |
| 5965 | Nct – Borckardt et al.,   | 2009 | Pain. 2011 Jan; 152(1):182-7                                        | non pertinent |
| 5966 | Nct – Silva               | 2009 | National Library of Medicine. 2009                                  | non pertinent |
| 5967 | Nct – GSK Clinical Trials | 2009 | National Library of Medicine. 2009                                  | non pertinent |
| 5968 | Nct – Curatolo            | 2009 | National Library of Medicine. 2009                                  | non pertinent |
| 5969 | Nct – Goldman             | 2009 | National Library of Medicine. 2009                                  | non pertinent |

|      |                                               |      |                                                              |               |
|------|-----------------------------------------------|------|--------------------------------------------------------------|---------------|
| 5970 | Nct – Ang                                     | 2009 | National Library of Medicine. 2009                           | non pertinent |
| 5971 | Nct – Vichinsky                               | 2009 | National Library of Medicine. 2009                           | non pertinent |
| 5972 | Nct – National Institute on Drug Abuse (NIDA) | 2009 | National Library of Medicine. 2009                           | non pertinent |
| 5973 | Nahmias et al.,                               | 2009 | Pain. 2009; 147(1-3):224-232                                 | non pertinent |
| 5974 | Murphy et al.,                                | 2009 | British j of psychiatry. 2009; 194(6):535-540                | non pertinent |
| 5975 | Mullally et al.,                              | 2009 | Pain Physician. 2009; 12(6):1005-1011                        | non pertinent |
| 5976 | Mulherin et al.,                              | 2009 | Foot (edinburgh, scotland). 2009; 19(2):98-100               | non pertinent |
| 5977 | Moulson et al.,                               | 2009 | Developmental psychology. 2009; 45(1):17-30                  | non pertinent |
| 5978 | Montoya et al.,                               | 2009 | Current medical research and opinion. 2009; 25(11):2745-2754 | non pertinent |
| 5979 | Miskowiak et al.,                             | 2009 | European neuropsychopharmacology. 2009; 19:189-190           | non pertinent |
| 5980 | Miner et al.,                                 | 2009 | Acad Emerg Med. 2009; 16(9):825-834                          | non pertinent |
| 5981 | Millàn-Guerrero et al.,                       | 2009 | European j of neurology. 2009; 16(1):88-94                   | non pertinent |
| 5982 | Mieres et al.,                                | 2009 | J of nuclear cardiology. 2009; 16(1):105-112                 | non pertinent |
| 5983 | Meunier et al.,                               | 2009 | Osteoporosis international. 2009; 20(10):1663-1673           | non pertinent |
| 5984 | Messier et al.,                               | 2009 | BMC Musculoskelet Disord. 2009; 10:93                        | non pertinent |
| 5985 | Mérelle et al.,                               | 2009 | Cephalalgia. 2009; 29(6):606-615                             | non pertinent |
| 5986 | Mercadante et al.,                            | 2009 | Current medical research and opinion. 2009; 25(11):2805-2815 | non pertinent |
| 5987 | Meininger et al.,                             | 2009 | Amyotrophic lateral sclerosis. 2009; 10(5-6):378-383         | non pertinent |
| 5988 | McDonald et al.,                              | 2009 | J Pain Symptom Manage. 2009; 37(6):1050-1060                 | non pertinent |
| 5989 | McDonald                                      | 2009 | Pain Manag Nurs. 2009; 10(3):142-148                         | non pertinent |
| 5990 | McCluney et al.,                              | 2009 | J of laryngology and otology. 2009; 123(6):626-630           | non pertinent |

|      |                        |      |                                                                                                          |               |
|------|------------------------|------|----------------------------------------------------------------------------------------------------------|---------------|
| 5991 | Masheb et al.,         | 2009 | Pain. 2009; 141(1-2):31-40                                                                               | non pertinent |
| 5992 | Marcus et al.,         | 2009 | J of the American Academy of Child and Adolescent Psychiatry. 2009; 48(11):1110-1119                     | non pertinent |
| 5993 | Mankowski et al.,      | 2009 | Obstetrics and gynecology. 2009; 113(5):1052-1057                                                        | non pertinent |
| 5994 | Manaktala et al.,      | 2009 | Indian j of dermatology. 2009; 54(4):350-356                                                             | non pertinent |
| 5995 | Magni et al.,          | 2009 | Anesth Analg. 2009; 109(2):567-571                                                                       | non pertinent |
| 5996 | Luckett et al.,        | 2009 | Psycho-oncology. 2009; 18(11):1129-1138                                                                  | non pertinent |
| 5997 | Lohle et al.,          | 2009 | Cardiovascular and interventional radiology. 2009; 32:268-                                               | non pertinent |
| 5998 | Litt et al.,           | 2009 | Pain. 2009; 145(1-2):160-168                                                                             | non pertinent |
| 5999 | Leykin et al.,         | 2009 | Arthroscopy. 2009; 25(9):1019-1024                                                                       | non pertinent |
| 6000 | Levy et al.,           | 2009 | Cancer. 2009; 115(1):207-216                                                                             | non pertinent |
| 6001 | Leutgeb et al.,        | 2009 | Biological psychology. 2009; 82(3):293-300                                                               | non pertinent |
| 6002 | Leslie et al.,         | 2009 | Anesthesiology. 2009; 111(3):547-555                                                                     | non pertinent |
| 6003 | Lera et al.,           | 2009 | J of psychosomatic research. 2009; 67(5):433-441                                                         | non pertinent |
| 6004 | Lee et al.,            | 2009 | J of rehabilitation medicine. 2009; 41(9):740-745                                                        | non pertinent |
| 6005 | Lee et al.,            | 2009 | Br J Anaesth. 2009; 103(6):861-866                                                                       | non pertinent |
| 6006 | Lazik et al.,          | 2009 | KIM – komplementare und integrative medizin. Arztezeitschrift fur naturheilverfahren . 2009; 50(3):41-46 | non pertinent |
| 6007 | Lascasas Porto et al., | 2009 | International angiology. 2009; 28(3):222-231                                                             | non pertinent |
| 6008 | Lameris et al.,        | 2009 | BMC (online). 2009; 339(7711):29-33                                                                      | non pertinent |

|      |                            |      |                                                                        |               |
|------|----------------------------|------|------------------------------------------------------------------------|---------------|
| 6009 | Lakse et al.,              | 2009 | American j of physical medicine & rehabilitation. 2009; 88(10):805-811 | non pertinent |
| 6010 | LaForce et al.,            | 2009 | Current medical research and opinion. 2009; 25(10):2353-2359           | non pertinent |
| 6011 | Krishnamoorthy et al.,     | 2009 | Expert review of cardiovascular therapy. 2009; 7(5):473-481            | non pertinent |
| 6012 | Konradsen et al.,          | 2009 | Ambulatory surgery. 2009; 15(1)                                        | non pertinent |
| 6013 | Kong et al.,               | 2009 | Neuroimage. 2009; 47(3):1066-1076                                      | non pertinent |
| 6014 | Kong et al.,               | 2009 | Neuroimage. 2009; 45(3):940-949                                        | non pertinent |
| 6015 | Kerssens et al.,           | 2009 | Anesthesiology. 2009; 111(3):518-524                                   | non pertinent |
| 6016 | Kanovsky et al.,           | 2009 | Clinical neuropharmacology. 2009; 32(5):259-265                        | non pertinent |
| 6017 | Johal et al.,              | 2009 | J of trauma. 2009; 67(4):875-882                                       | non pertinent |
| 6018 | Iwanaga et al.,            | 2009 | Diabetes technology & therapeutics. 2009; 11(2):81-86                  | non pertinent |
| 6019 | Isrctn - Biffi             | 2009 | ISRCTN Registry. 2009                                                  | non pertinent |
| 6020 | Isrctn - Ong               | 2009 | ISRCTN Registry. 2009                                                  | non pertinent |
| 6021 | Isrctn - Österman          | 2009 | ISRCTN Registry. 2009                                                  | non pertinent |
| 6022 | Ishinova et al.,           | 2009 | Span J Psychol. 2009; 12(2):715-724                                    | non pertinent |
| 6023 | Irct38804082093N - Moin    | 2009 | Iranian Registry of Clinical Trials. 2009                              | non pertinent |
| 6024 | Irct138712111719 N - Otadi | 2009 | Iranian Registry of Clinical Trials. 2009                              | non pertinent |
| 6025 | Hurley et al.,             | 2009 | BMC musculoskeletal disorders. 2009; 10:79                             | non pertinent |
| 6026 | Hurlemann et al.,          | 2009 | European neuropsychopharmacology. 2009; 19:307                         | non pertinent |
| 6027 | Hunter et al.,             | 2009 | Pain Med. 2009; 10(4):730-738                                          | non pertinent |
| 6028 | Hun et al.,                | 2009 | Postgraduate medicine. 2009; 121(2):119-124                            | non pertinent |
| 6029 | Holguin et al.,            | 2009 | Spine J. 2009; 9(6):470-477                                            | non pertinent |

|      |                             |      |                                                                  |               |
|------|-----------------------------|------|------------------------------------------------------------------|---------------|
| 6030 | Herrndobler et al.,         | 2009 | Schmerz (berlin, germany). 2009; 23(2):134-144                   | non pertinent |
| 6031 | Hellings et al.,            | 2009 | J of clinical psychopharmacol ogy. 2009; 29(5):492-495           | non pertinent |
| 6032 | Harris et al.,              | 2009 | Neuroimage. 2009; 47(3):1077-1085                                | non pertinent |
| 6033 | Gwee et al.,                | 2009 | European j of gastroenterology & hepatology. 2009; 21(4):417-424 | non pertinent |
| 6034 | Gunzler                     | 2009 | Expert opinion on pharmacotherapy. 2009; 10(6):1027-1038         | non pertinent |
| 6035 | Gruenewald et al.,          | 2009 | Br J Anaesth. 2009; 103(4):586-593                               | non pertinent |
| 6036 | Gilron et al.,              | 2009 | Lancet. 2009; 374(9697):1252-1261                                | non pertinent |
| 6037 | Gatchel et al.,             | 2009 | J of occupational rehabilitation. 2009; 19(1):49-55              | non pertinent |
| 6038 | García-Campayo et al.,      | 2009 | Trials. 2009; 10:24                                              | non pertinent |
| 6039 | Gacto et al.,               | 2009 | Burns. 2009; 35(3):343-347                                       | non pertinent |
| 6040 | Fusar-Poli et al.,          | 2009 | Arch Gen Psychiatry. 2009; 66(1):95-105                          | non pertinent |
| 6041 | Furuzawa-carballeda et al., | 2009 | European j of clinical investigation. 2009; 39(7):598-606        | non pertinent |
| 6042 | Foley et al.,               | 2009 | International j of dermatology. 2009; 48(11):1236-1245           | non pertinent |
| 6043 | Fokkema et al.,             | 2009 | Circulation. Cardiovascular interventions. 2009; 2(4):323-329    | non pertinent |
| 6044 | Faraoni et al.,             | 2009 | Br J Anaesth. 2009; 102(3):336-339                               | non pertinent |
| 6045 | Fang et al.,                | 2009 | Hum Brain Mapp. 2009; 30(4):1196-1206                            | non pertinent |
| 6046 | Euctr, G.B.                 | 2009 | EU Clinical Trials Register. 2009                                | non pertinent |
| 6047 | Eser et al.,                | 2009 | J Psychiatr Res. 2009; 43(4):393-400                             | non pertinent |
| 6048 | Eisenberger et al.,         | 2009 | Neuroimage. 2009; 47(3):881-890                                  | non pertinent |
| 6049 | Eippert et al.,             | 2009 | Science. 2009; 326(5951):404                                     | non pertinent |

|      |                           |      |                                                                                                     |               |
|------|---------------------------|------|-----------------------------------------------------------------------------------------------------|---------------|
| 6050 | Eippert et al.,           | 2009 | Neuron. 2009; 63(4):533-543                                                                         | non pertinent |
| 6051 | Dychter et al.,           | 2009 | Current therapeutic research – clinical and experimental. 2009; 70(6):421-438                       | non pertinent |
| 6052 | Doufas et al.,            | 2009 | Anesth Analg. 2009; 109(4):1097-1104                                                                | non pertinent |
| 6053 | Di Clemente et al.,       | 2009 | Pain. 2009; 144(1-2):156-161                                                                        | non pertinent |
| 6054 | Dharmapalaiah et al.,     | 2009 | Rheumatology. 2009; 48:i42-i43                                                                      | non pertinent |
| 6055 | Derntl et al.,            | 2009 | Psychoneuroendocrinology. 2009; 34(5):687-693                                                       | non pertinent |
| 6056 | Deng et al.,              | 2009 | Chinese j of traumatology = zhonghua chuang shang za zhi. 2009; 12(4):223-227                       | non pertinent |
| 6057 | Del-Ben et al.,           | 2009 | European neuropsychopharmacology. 2009; 19:609-610                                                  | non pertinent |
| 6058 | Del Campo et al.,         | 2009 | Annals of oncology: official j of the european society for medical oncology. 2009; 20(11):1794-1802 | non pertinent |
| 6059 | Daniels et al.,           | 2009 | Current medical research and opinion. 2009; 25(3):765-776                                           | non pertinent |
| 6060 | Cunningham-Bussel et al., | 2009 | Psychoneuroendocrinology. 2009; 34(5):694-704                                                       | non pertinent |
| 6061 | Coyle                     | 2009 | Annals of indian academy of neurology. 2009; 12(4):273-282                                          | non pertinent |
| 6062 | Corsinovi et al.,         | 2009 | Arch Gerontol Geriatr. 2009; 49(3):378-382                                                          | non pertinent |
| 6063 | Corinaldesi et al.,       | 2009 | Alimentary pharmacology & therapeutics. 2009; 30(3):245-252                                         | non pertinent |
| 6064 | Coppens et al.,           | 2009 | Neuropsychologia. 2009; 47(12):2496-2503                                                            | non pertinent |
| 6065 | Cong et al.,              | 2009 | Early Hum Dev. 2009; 85(9):561-567                                                                  | non pertinent |
| 6066 | Cohen et al.,             | 2009 | BMJ (Clinical research ed.). 2009; 338:b1088                                                        | non pertinent |

|      |                     |      |                                                                                    |               |
|------|---------------------|------|------------------------------------------------------------------------------------|---------------|
| 6067 | Coen et al.,        | 2009 | Gastroenterology. 2009                                                             | non pertinent |
| 6068 | Coakley et al.,     | 2009 | Complement Ther Clin Pract. 2009; 15(3):141-146                                    | non pertinent |
| 6069 | Chu et al.,         | 2009 | Zhong xi yi jie he xue bao (j of chinese integrative medicine). 2009; 7(8):729-735 | non pertinent |
| 6070 | Childress et al.,   | 2009 | J of child and adolescent psychopharmacology. 2009; 19(4):351-361                  | non pertinent |
| 6071 | Chi, Ctr Trc -      | 2009 | Chinese Clinical Trial Registry. 2009                                              | non pertinent |
| 6072 | Chi, Ctr Tcc -      | 2009 | Chinese Clinical Trial Registry. 2009                                              | non pertinent |
| 6073 | Chi, Ctr Trc -      | 2009 | Chinese Clinical Trial Registry. 2009                                              | non pertinent |
| 6074 | Chae et al.,        | 2009 | Neurosci Lett. 2009; 450(2):80-84                                                  | non pertinent |
| 6075 | Carey et al.,       | 2009 | HIV medicine. 2009; 10(3):163-172                                                  | non pertinent |
| 6076 | Cantiello et al.,   | 2009 | BJU international. 2009; 103(9):1195-1198                                          | non pertinent |
| 6077 | Busto et al.,       | 2009 | Synapse. 2009; 63(8):681-689                                                       | non pertinent |
| 6078 | Bresolin et al.,    | 2009 | European review for medical and pharmacological sciences. 2009; 13(5):365-370      | non pertinent |
| 6079 | Bovend'Eerd et al., | 2009 | Clin Rehabil. 2009; 23(2):137-145                                                  | non pertinent |
| 6080 | Borruto et al.,     | 2009 | Archives of gynecology and obstetrics. 2009; 280(5):707-712                        | non pertinent |
| 6081 | Borckardt et al.,   | 2009 | Pain Med. 2009; 10(5):840-849                                                      | non pertinent |
| 6082 | Boggio et al.,      | 2009 | Clinical j of Pain. 2009; 25(8):691-695                                            | non pertinent |
| 6083 | Blonde et al.,      | 2009 | Diabetes, obesity & metabolism. 2009; 11(10):978-986                               | non pertinent |
| 6084 | Blake et al.,       | 2009 | Anaesthesia and intensive care. 2009; 37(5):720-725                                | non pertinent |
| 6085 | Berlemann et al.,   | 2009 | European spine j. 2009; 18(11):1706-1712                                           | non pertinent |

|      |                         |      |                                                                                      |               |
|------|-------------------------|------|--------------------------------------------------------------------------------------|---------------|
| 6086 | Berger et al.,          | 2009 | American heart j. 2009; 158(6):998-1004.e1001                                        | non pertinent |
| 6087 | Berberoglu et al.,      | 2009 | Endocrinologist. 2009; 19(6):271-279                                                 | non pertinent |
| 6088 | Beran et al.,           | 2009 | BMC infectious diseases. 2009; 9:2                                                   | non pertinent |
| 6089 | Ben Salah et al.,       | 2009 | Plos neglected tropical diseases. 2009; 3(5):e432                                    | non pertinent |
| 6090 | Bell et al.,            | 2009 | Malaria j. 2009; 8:204                                                               | non pertinent |
| 6091 | Bedi et al.,            | 2009 | Psychopharmacology (Berl). 2009; 207(1):73-83                                        | non pertinent |
| 6092 | Banzhoff et al.,        | 2009 | PLoS One. 2009; 4(2):e4384                                                           | non pertinent |
| 6093 | Aupperle et al.,        | 2009 | CNS spectrums. 2009; 14(10):556-571                                                  | non pertinent |
| 6094 | Ashwathnarayana et al., | 2009 | Vaccine. 2009; 28(1):148-151                                                         | non pertinent |
| 6095 | Arolt et al.,           | 2009 | Pmp psychotherapie psychosomatik medizinische psychologie. 2009; 59(3-4):124-131     | non pertinent |
| 6096 | Apiliogullari et al.,   | 2009 | Paediatric anaesthesia. 2009; 19(11):1078-1083                                       | non pertinent |
| 6097 | Apfel et al.,           | 2009 | Pain practice. 2009; 9:119-                                                          | non pertinent |
| 6098 | Apan et al.,            | 2009 | Minerva Anesthesiol. 2009; 75(5):239-244                                             | non pertinent |
| 6099 | Andersen et al.,        | 2009 | Spine (Phila Pa 1976). 2009; 34(21):2248-2253                                        | non pertinent |
| 6100 | Amaravadi et al.,       | 2009 | Clinical cancer research. 2009; 15(24):7711-7718                                     | non pertinent |
| 6101 | Aman et al.,            | 2009 | J of the American Academy of Child and Adolescent Psychiatry. 2009; 48(12):1143-1154 | non pertinent |
| 6102 | Al-Azemi et al.,        | 2009 | BJOG. 2009; 116(12):1646-1656                                                        | non pertinent |
| 6103 | Ackerstaff et al.,      | 2009 | Head & neck. 2009; 31(1):77-84                                                       | non pertinent |
| 6104 | Zatloukal et al.,       | 2008 | J of thoracic oncology. 2008; 3(8):894-901                                           | non pertinent |
| 6105 | Yurgelun-Todd et al.,   | 2008 | Experimental and clinical psychopharmacology. 2008; 16(3):191-198                    | non pertinent |



|      |                           |      |                                                                       |               |
|------|---------------------------|------|-----------------------------------------------------------------------|---------------|
| 6106 | Yuge et al.,              | 2008 | Anesthesia and resuscitation. 2008; 44(SUPPL):135-149                 | non pertinent |
| 6107 | Young et al.,             | 2008 | Haemophilia. 2008; 14(2):287-294                                      | non pertinent |
| 6108 | Yi et al.,                | 2008 | Br J Anaesth. 2008; 101(2):234-238                                    | non pertinent |
| 6109 | Xu et al.,                | 2008 | PLoS One. 2008; 3(7):e2565                                            | non pertinent |
| 6110 | Xie et al.,               | 2008 | Nutrition j. 2008; 7:31                                               | non pertinent |
| 6111 | Wurgler-Hauri et al.,     | 2008 | Spine (Phila Pa 1976). 2008; 33(3):E66-72                             | non pertinent |
| 6112 | Worcester et al.,         | 2008 | Primary care – clinics in office practice. 2008; 35(2):369-391        | non pertinent |
| 6113 | White et al.,             | 2008 | J of clinical hypertension (Greenwich, Conn.). 2008; 10(6):450-458    | non pertinent |
| 6114 | Whalen et al.,            | 2008 | Biol Psychiatry. 2008; 63(9):858-863                                  | non pertinent |
| 6115 | Westin et al.,            | 2008 | Int J Audiol. 2008; 47 Suppl 2:112-118                                | non pertinent |
| 6116 | Weinblatt et al.,         | 2008 | Arthritis and rheumatism. 2008; 58(11):3309-                          | non pertinent |
| 6117 | Warrell et al.,           | 2008 | Plos neglected tropical diseases. 2008; 2(4):e224                     | non pertinent |
| 6118 | Wang et al.,              | 2008 | Acute pain. 2008; 10(2):65-71                                         | non pertinent |
| 6119 | Vincenti et al.,          | 2008 | American j of transplantation. 2008; 8(2):307-316                     | non pertinent |
| 6120 | Vemuri et al.,            | 2008 | Physiology & behavior. 2008; 93(4-5):671-686                          | non pertinent |
| 6121 | Unlu et al.,              | 2008 | J of manipulative and physiological therapeutics. 2008; 31(3):191-198 | non pertinent |
| 6122 | Tveita et al.,            | 2008 | BMC musculoskeletal disorders. 2008; 9:53                             | non pertinent |
| 6123 | Tufanogullari et al.,     | 2008 | Anesthesia and Analgesia. 2008; 106(6):1741-1748                      | non pertinent |
| 6124 | Tuchman et al.,           | 2008 | CNS Drugs. 2008; 22(10):877-886                                       | non pertinent |
| 6125 | Tournier-Rangeard et al., | 2008 | Radiother Oncol. 2008; 87(3):391-397                                  | non pertinent |

|      |                      |      |                                                                                   |               |
|------|----------------------|------|-----------------------------------------------------------------------------------|---------------|
| 6126 | Togha et al.,        | 2008 | J of headache and pain. 2008; 9(2):77-82                                          | non pertinent |
| 6127 | Thera et al.,        | 2008 | PLoS One. 2008; 3(1):e1465                                                        | non pertinent |
| 6128 | Terpos et al.,       | 2008 | Expert opinion on drug metabolism & toxicology. 2008; 4(5):639-654                | non pertinent |
| 6129 | Terney et al.,       | 2008 | J Pain Symptom Manage. 2008; 36(1):79-91                                          | non pertinent |
| 6130 | Taucher et al.,      | 2008 | Breast cancer research and treatment. 2008; 112(2):309-316                        | non pertinent |
| 6131 | Szmuk et al.,        | 2008 | Anesthesia and Analgesia. 2008; 107(1):77-80                                      | non pertinent |
| 6132 | Sundy et al.,        | 2008 | Arthritis and rheumatism. 2008; 58(9):2882-                                       | non pertinent |
| 6133 | Streitberger et al., | 2008 | J of alternative and complementary medicine (New York, N.Y.). 2008; 14(5):505-513 | non pertinent |
| 6134 | Stracke et al.,      | 2008 | Experimental and clinical endocrinology & diabetes. 2008; 116(10):600-605         | non pertinent |
| 6135 | Stegmann et al.,     | 2008 | Current medical research and opinion. 2008; 24(11):3185-3196                      | non pertinent |
| 6136 | Soyka et al.,        | 2008 | J of clinical psychopharmacology. 2008; 28(3):317-324                             | non pertinent |
| 6137 | Sokunbi et al.,      | 2008 | Nigerian quarterly j of hospital medicine. 2008; 18(4):231-243                    | non pertinent |
| 6138 | Sng et al.,          | 2008 | Anaesthesia and intensive care. 2008; 36(5):659-664                               | non pertinent |
| 6139 | Smeets et al.,       | 2008 | Pain. 2008; 134(3):263-276                                                        | non pertinent |
| 6140 | Singer et al.,       | 2008 | Emotion. 2008; 8(6):781-791                                                       | non pertinent |
| 6141 | Sierra et al.,       | 2008 | BMC Cancer. 2008; 8:195                                                           | non pertinent |
| 6142 | Siddiqui et al.,     | 2008 | Saudi medical j. 2008; 29(7):966-970                                              | non pertinent |
| 6143 | Shoham et al.,       | 2008 | Clinical endocrinology. 2008; 69(3):471-478                                       | non pertinent |

|      |                          |      |                                                             |               |
|------|--------------------------|------|-------------------------------------------------------------|---------------|
| 6144 | Sheldon et al.,          | 2008 | Clinical and experimental rheumatology. 2008; 26(4):611-619 | non pertinent |
| 6145 | Shah et al.,             | 2008 | Indian pediatrics. 2008; 45(10):819-823                     | non pertinent |
| 6146 | Sewell et al.,           | 2008 | Neuroreport. 2008; 19(13):1339-1343                         | non pertinent |
| 6147 | Sengupta et al.,         | 2008 | Arthritis research & therapy. 2008; 10(4):R85               | non pertinent |
| 6148 | Scott et al.,            | 2008 | Arch Gen Psychiatry. 2008; 65(2):220-231                    | non pertinent |
| 6149 | Schroeter et al.,        | 2008 | Neurobiology of aging. 2008; 29(3):418-426                  | non pertinent |
| 6150 | Scherbaum et al.,        | 2008 | Diabetes, obesity & metabolism. 2008; 10(11):1114-1124      | non pertinent |
| 6151 | Santarcangelo et al.,    | 2008 | Brain Res Bull. 2008; 75(5):692-697                         | non pertinent |
| 6152 | Sánchez-Guerrero et al., | 2008 | J of rheumatology. 2008; 35(8):1567-1575                    | non pertinent |
| 6153 | Roitberg et al.,         | 2008 | Neurosurgery. 2008; 63(1):115-120                           | non pertinent |
| 6154 | Roijezon et al.,         | 2008 | J of neuroengineering and rehabilitation. 2008; 5           | non pertinent |
| 6155 | Roestenberg et al.,      | 2008 | PLoS One. 2008; 3(12):e3960                                 | non pertinent |
| 6156 | Rawlani et al.,          | 2008 | Plastic and reconstructive surgery. 2008; 122(1):39-52      | non pertinent |
| 6157 | Ramos-Reyna et al.,      | 2008 | Archivos de neurociencias. 2008; 13(4):237-241              | non pertinent |
| 6158 | Ramlau et al.,           | 2008 | J of thoracic oncology. 2008; 3(7):735-744                  | non pertinent |
| 6159 | Putzier et al.,          | 2008 | J Neurosurg Spine. 2008; 8(6):536-543                       | non pertinent |
| 6160 | Pradhan et al.,          | 2008 | Kathmandu university medical j (KUJM). 2008; 6(2):166-172   | non pertinent |
| 6161 | Poreisz et al.,          | 2008 | Neuroreport. 2008; 19(2):193-196                            | non pertinent |
| 6162 | Pihan et al.,            | 2008 | Brain Lang. 2008; 105(2):141-147                            | non pertinent |
| 6163 | Phan et al.,             | 2008 | J Neurosci. 2008; 28(10):2313-2319                          | non pertinent |

|      |                                               |      |                                                              |               |
|------|-----------------------------------------------|------|--------------------------------------------------------------|---------------|
| 6164 | Pascual et al.,                               | 2008 | J Headache Pain. 2008; 9(5):259-266                          | non pertinent |
| 6165 | Panzer et al.,                                | 2008 | Respiratory medicine. 2008; 102(9):1296-1304                 | non pertinent |
| 6166 | Palomba et al.,                               | 2008 | Menopause (New York, N.Y.). 2008; 15(4 Pt 1):730-736         | non pertinent |
| 6167 | Paick et al.,                                 | 2008 | J of sexual medicine. 2008; 5(11):2672-2680                  | non pertinent |
| 6168 | Ozone et al.,                                 | 2008 | Pharmacopsychiatry. 2008; 41(3):106-114                      | non pertinent |
| 6169 | Owusu-Agyei et al.,                           | 2008 | PLoS One. 2008; 3(6):e2530                                   | non pertinent |
| 6170 | Oelkers-Ax et al.,                            | 2008 | Eur J Pain. 2008; 12(3):301-313                              | non pertinent |
| 6171 | O'Dea et al.,                                 | 2008 | Current medical research and opinion. 2008; 24(10):2785-2793 | non pertinent |
| 6172 | Ntr – Wall                                    | 2008 | Netherlands Trial Register. 2008                             | non pertinent |
| 6173 | Ntr – Bodden                                  | 2008 | Netherlands Trial Register. 2008                             | non pertinent |
| 6174 | Nor Azlin et al.,                             | 2008 | J of obstetrics and gynaecology. 2008; 28(4):424-426         | non pertinent |
| 6175 | Nir et al.,                                   | 2008 | J Pain. 2008; 9(11):1058-1069                                | non pertinent |
| 6176 | Nguyen et al.,                                | 2008 | BMC pregnancy and childbirth. 2008; 8:17                     | non pertinent |
| 6177 | Nguyen et al.,                                | 2008 | Brain stimulation. 2008; 1(2):89-96                          | non pertinent |
| 6178 | Negaard et al.,                               | 2008 | Scand J Gastroenterol. 2008; 43(1):44-51                     | non pertinent |
| 6179 | Ndiaye et al.,                                | 2008 | Malaria j. 2008; 7:16                                        | non pertinent |
| 6180 | Nct – Keener                                  | 2008 | National Library of Medicine. 2008                           | non pertinent |
| 6181 | Nct – Haenggi                                 | 2008 | National Library of Medicine. 2008                           | non pertinent |
| 6182 | Nct - Sambrook                                | 2008 | National Library of Medicine. 2008                           | non pertinent |
| 6183 | Nct – Heyer                                   | 2008 | National Library of Medicine. 2008                           | non pertinent |
| 6184 | Nct – National University Hospital, Singapore | 2008 | National Library of Medicine. 2008                           | non pertinent |
| 6185 | Nct – Pitman                                  | 2008 | National Library of Medicine. 2008                           | non pertinent |
| 6186 | Nct - Heishman                                | 2008 | National Library of Medicine. 2008                           | non pertinent |
| 6187 | Nct - Paludetti                               | 2008 | National Library of Medicine. 2008                           | non pertinent |
| 6188 | Nct - Baraniuk                                | 2008 | National Library of Medicine. 2008                           | non pertinent |
| 6189 | Nct - Schwartz                                | 2008 | National Library of Medicine. 2008                           | non pertinent |

|      |                          |      |                                                             |               |
|------|--------------------------|------|-------------------------------------------------------------|---------------|
| 6190 | Nct - Sobell             | 2008 | National Library of Medicine. 2008                          | non pertinent |
| 6191 | Nct - Ekici              | 2008 | National Library of Medicine. 2008                          | non pertinent |
| 6192 | Nct - Ortho-McNeil       | 2008 | National Library of Medicine. 2008                          | non pertinent |
| 6193 | Nct - Weisbord           | 2008 | National Library of Medicine. 2008                          | non pertinent |
| 6194 | Nct - Naylor             | 2008 | National Library of Medicine. 2008                          | non pertinent |
| 6195 | Mullen et al.,           | 2008 | PLoS One. 2008; 3(8):e2940                                  | non pertinent |
| 6196 | Moore et al.,            | 2008 | European j of anaesthesiology. 2008; 25(11):876-883         | non pertinent |
| 6197 | Misra et al.,            | 2008 | J Pain. 2008; 9(12):1116-1122                               | non pertinent |
| 6198 | Miskowiak et al.,        | 2008 | Neuropsychopharmacology. 2008; 33(3):611-618                | non pertinent |
| 6199 | Minnemann et al.,        | 2008 | J of endocrinological investigation. 2008; 31(8):718-723    | non pertinent |
| 6200 | Miller et al.,           | 2008 | Surgical endoscopy. 2008; 22(11):2478-2484                  | non pertinent |
| 6201 | Milanés-Virelles et al., | 2008 | BMC infectious diseases. 2008; 8:17                         | non pertinent |
| 6202 | Mercadante et al.,       | 2008 | J of clinical monitoring and computing. 2008; 22(4):293-298 | non pertinent |
| 6203 | Mendelson et al.,        | 2008 | Neuropsychopharmacology. 2008; 33(4):749-760                | non pertinent |
| 6204 | Mehta et al.,            | 2008 | Psychopharmacology (Berl). 2008; 196(1):157-165             | non pertinent |
| 6205 | McCormack et al.,        | 2008 | Drugs. 2008; 68(4):487-506                                  | non pertinent |
| 6206 | Maurer et al.,           | 2008 | J Spinal Disord Tech. 2008; 21(1):55-62                     | non pertinent |
| 6207 | Mastronardi et al.,      | 2008 | Spine (Phila Pa 1976). 2008; 33(14):1562-1566               | non pertinent |
| 6208 | Marquis et al.,          | 2008 | Osteoporosis international. 2008; 19(4):503-510             | non pertinent |
| 6209 | Margetts et al.,         | 2008 | European j of anaesthesiology. 2008; 25(12):1009-1013       | non pertinent |
| 6210 | Marcellin et al.,        | 2008 | New England j of medicine. 2008; 359(23):2442-2455          | non pertinent |
| 6211 | Mañas et al.,            | 2008 | Clinical & translational oncology. 2008; 10(5):281-287      | non pertinent |

|      |                          |      |                                                                           |               |
|------|--------------------------|------|---------------------------------------------------------------------------|---------------|
| 6212 | Maiteki-Sebuguzi et al., | 2008 | Malaria j. 2008; 7:106                                                    | non pertinent |
| 6213 | Magnusson et al.,        | 2008 | Spine. 2008; 33(16):E532-538                                              | non pertinent |
| 6214 | Mackay-Sim et al.,       | 2008 | Brain. 2008; 131(Pt 9):2376-2386                                          | non pertinent |
| 6215 | Machata et al.,          | 2008 | Br J Anaesth. 2008; 101(2):239-243                                        | non pertinent |
| 6216 | Liu et al.,              | 2008 | Phytotherapy research : PTR. 2008; 22(11):1539-1543                       | non pertinent |
| 6217 | Liu et al.,              | 2008 | Acta Neurochir Suppl. 2008; 101:71-76                                     | non pertinent |
| 6218 | Lee et al.,              | 2008 | International clinical psychopharmacology. 2008; 23(6):337-341            | non pertinent |
| 6219 | Lee et al.,              | 2008 | Korean j of biological psychiatry. 2008; 15(1):35-45                      | non pertinent |
| 6220 | Leach et al.,            | 2008 | Pediatric infectious disease j. 2008; 27(8):692-698                       | non pertinent |
| 6221 | Lauwick et al.,          | 2008 | J canadien d'anesthesie (Canadian j of anaesthesia). 2008; 55(11):754-760 | non pertinent |
| 6222 | Lamm et al.,             | 2008 | Brain Res. 2008; 1227:153-161                                             | non pertinent |
| 6223 | Kyle et al.,             | 2008 | International j of clinical practice. 2008; 62(11):1684-1692              | non pertinent |
| 6224 | Kweku et al.,            | 2008 | PLoS One. 2008; 3(12):e4000                                               | non pertinent |
| 6225 | Kowalski et al.,         | 2008 | Clinical pharmacology and therapeutics. 2008; 83(6):857-866               | non pertinent |
| 6226 | Korovessis et al.,       | 2008 | J of spinal disorders & techniques. 2008; 21(4):293-298                   | non pertinent |
| 6227 | Kordon et al.,           | 2008 | J of clinical psychopharmacology. 2008; 28(5):550-554                     | non pertinent |
| 6228 | Kocaman et al.,          | 2008 | Turkiye fiziksel tip ve rehabilitasyon dergisi. 2008; 54(2):54-58         | non pertinent |

|      |                   |      |                                                                               |               |
|------|-------------------|------|-------------------------------------------------------------------------------|---------------|
| 6229 | Kobayashi et al., | 2008 | Japanese j of chemotherapy. 2008; 56(SUPPL 1):36-48                           | non pertinent |
| 6230 | Ko et al.,        | 2008 | Arthroscopy. 2008; 24(9):1005-1012                                            | non pertinent |
| 6231 | Kleinert et al.,  | 2008 | Anesthesia and Analgesia. 2008; 107(6):2048-2055                              | non pertinent |
| 6232 | Kim et al.,       | 2008 | Helicobacter. 2008; 13(6):542-549                                             | non pertinent |
| 6233 | Kim et al.,       | 2008 | Helicobacter. 2008; 13(4):261-268                                             | non pertinent |
| 6234 | Kim et al.,       | 2008 | J Neurosurg Anesthesiol. 2008; 20(1):1-7                                      | non pertinent |
| 6235 | Killgore et al.,  | 2008 | Neuroreport. 2008; 19(15):1523-1527                                           | non pertinent |
| 6236 | Kilic et al.,     | 2008 | Digestive diseases and sciences. 2008; 53(12):3133-3137                       | non pertinent |
| 6237 | Keystone et al.,  | 2008 | Arthritis and rheumatism. 2008; 58(11):3319-                                  | non pertinent |
| 6238 | Keller et al.,    | 2008 | Pain Med. 2008; 9(6):680-687                                                  | non pertinent |
| 6239 | Kearney et al.,   | 2008 | Nature clinical practice gastroenterology and hepatology. 2008; 5(11):624-636 | non pertinent |
| 6240 | Kaye              | 2008 | Canadian urological association j. 2008; 2(6):604-608                         | non pertinent |
| 6241 | Kaviani et al.,   | 2008 | World j of surgery. 2008; 32(11):2464-2470                                    | non pertinent |
| 6242 | Katz et al.,      | 2008 | International j of clinical practice. 2008; 62(9):1455-1464                   | non pertinent |
| 6243 | Karabekir et al., | 2008 | Neurosciences (riyadh, saudi arabia). 2008; 13(3):248-252                     | non pertinent |
| 6244 | Kang et al.,      | 2008 | J Clin Anesth. 2008; 20(1):12-16                                              | non pertinent |
| 6245 | Kalman et al.,    | 2008 | Nutrition j. 2008; 7:3                                                        | non pertinent |
| 6246 | Kalia et al.,     | 2008 | The lancet neurology. 2008; 7(8):742-755                                      | non pertinent |
| 6247 | Jones et al.,     | 2008 | Arthritis Rheum. 2008; 58(2):612-622                                          | non pertinent |
| 6248 | Jensch et al.,    | 2008 | AJR Am J Roentgenol. 2008; 191(1):158-167                                     | non pertinent |

|      |                    |      |                                                             |               |
|------|--------------------|------|-------------------------------------------------------------|---------------|
| 6249 | Jadidi et al.,     | 2008 | J of oral rehabilitation. 2008; 35(3):171-183               | non pertinent |
| 6250 | Isrctn - Bongi     | 2008 | ISRCTN Registry. 2008                                       | non pertinent |
| 6251 | Isrctn – Choy      | 2008 | ISRCTN Registry. 2008                                       | non pertinent |
| 6252 | Isrctn – Toukhsati | 2008 | ISRCTN Registry. 2008                                       | non pertinent |
| 6253 | Isrctn - Jiya      | 2008 | ISRCTN Registry. 2008                                       | non pertinent |
| 6254 | Huang et al.,      | 2008 | BMC musculoskeletal disorders. 2008; 9:77                   | non pertinent |
| 6255 | Hua et al.,        | 2008 | Cell Mol Neurobiol. 2008; 28(1):57-70                       | non pertinent |
| 6256 | Hu et al.,         | 2008 | PLoS One. 2008; 3(4):e1952                                  | non pertinent |
| 6257 | Hong et al.,       | 2008 | Eur J Anaesthesiol. 2008; 25(6):460-467                     | non pertinent |
| 6258 | Hong et al.,       | 2008 | Anesthesia and Analgesia. 2008; 107(3):1005-1010            | non pertinent |
| 6259 | Holmes et al.,     | 2008 | Epilepsy Res. 2008; 82(2-3):124-132                         | non pertinent |
| 6260 | Hoft et al.,       | 2008 | J of infectious diseases. 2008; 198(10):1491-1501           | non pertinent |
| 6261 | Hirsch et al.,     | 2008 | European j of medical research. 2008; 13(11):505-510        | non pertinent |
| 6262 | Harms et al.,      | 2008 | PLoS One. 2008; 3(5):e2158                                  | non pertinent |
| 6263 | Harada et al.,     | 2008 | Japanese pharmacology and therapeutics. 2008; 36(2):129-140 | non pertinent |
| 6264 | Hadjikhani et al., | 2008 | Brain Cogn. 2008; 68(1):1-8                                 | non pertinent |
| 6265 | Habib et al.,      | 2008 | Anesthesia and Analgesia. 2008; 107(3):999-1004             | non pertinent |
| 6266 | Habib et al.,      | 2008 | Anesthesiology. 2008; 109(6):1085-1091                      | non pertinent |
| 6267 | Gürkov et al.,     | 2008 | Malaria j. 2008; 7:179                                      | non pertinent |
| 6268 | Gurbet et al.,     | 2008 | European spine j. 2008; 17(9):1237-1241                     | non pertinent |
| 6269 | Graziani et al.,   | 2008 | J of craniofacial surgery. 2008; 19(4):1061-1066            | non pertinent |
| 6270 | Goff et al.,       | 2008 | Schizophrenia research. 2008; 106(2-3):320-327              | non pertinent |



|      |                              |      |                                                             |               |
|------|------------------------------|------|-------------------------------------------------------------|---------------|
| 6271 | Godard et al.,               | 2008 | Respiratory medicine. 2008; 102(8):1124-1131                | non pertinent |
| 6272 | Goadsby et al.,              | 2008 | Cephalalgia. 2008; 28(4):383-391                            | non pertinent |
| 6273 | Goadsby                      | 2008 | Cephalalgia. 2008; 28(Suppl 2):36-41                        | non pertinent |
| 6274 | Ge et al.,                   | 2008 | Exp Brain Res. 2008; 187(4):623-629                         | non pertinent |
| 6275 | Ganesh et al.,               | 2008 | Anesthesiology. 2008; 109(5):890-894                        | non pertinent |
| 6276 | Galan-Herrera et al.,        | 2008 | Clinical therapeutics. 2008; 30(9):1667-1674                | non pertinent |
| 6277 | Furie et al.,                | 2008 | Arthritis research & therapy. 2008; 10(5):R109              | non pertinent |
| 6278 | Frestedt et al.,             | 2008 | Nutrition j. 2008; 7:9                                      | non pertinent |
| 6279 | Fregni et al.,               | 2008 | J Clin Psychiatry. 2008; 69(1):32-40                        | non pertinent |
| 6280 | Franzen-Korzendorfer et al., | 2008 | Ostomy Wound Manage. 2008; 54(6):16-31                      | non pertinent |
| 6281 | Foley et al.,                | 2008 | Spine J. 2008; 8(3):436-442                                 | non pertinent |
| 6282 | Feldblum et al.,             | 2008 | PLoS One. 2008; 3(1):e1474                                  | non pertinent |
| 6283 | Fassoulaki et al.,           | 2008 | Anesthesia and Analgesia. 2008; 107(5):1715-1719            | non pertinent |
| 6284 | Fadel et al.,                | 2008 | Egyptian j of anaesthesia. 2008; 24(4):275-284              | non pertinent |
| 6285 | Euctr, S.E.                  | 2008 | EU Clinical Trials Register. 2008                           | non pertinent |
| 6286 | Euctr, N.L.                  | 2008 | EU Clinical Trials Register. 2008                           | non pertinent |
| 6287 | Elewski et al.,              | 2008 | J of the American Academy of Dermatology. 2008; 59(1):41-54 | non pertinent |
| 6288 | Eippert et al.,              | 2008 | J Neurosci. 2008; 28(21):5465-5472                          | non pertinent |
| 6289 | Ebell                        | 2008 | Contemporary hypnosis. 2008; 25(1):46-56                    | non pertinent |
| 6290 | E Silva et al.,              | 2008 | Paediatric anaesthesia. 2008; 18(2):176-183                 | non pertinent |
| 6291 | Drapier et al.,              | 2008 | Neuropsychologia. 2008; 46(11):2796-2801                    | non pertinent |
| 6292 | Dougherty et al.,            | 2008 | Behav Brain Res. 2008; 193(1):63-68                         | non pertinent |
| 6293 | Derntl et al.,               | 2008 | Psychoneuroendocrinology. 2008; 33(8):1031-1040             | non pertinent |

|      |                           |      |                                                                  |               |
|------|---------------------------|------|------------------------------------------------------------------|---------------|
| 6294 | Denenberg et al.,         | 2008 | J Am Vet Med Assoc. 2008; 233(12):1874-1882                      | non pertinent |
| 6295 | Delmas et al.,            | 2008 | Osteoporosis international. 2008; 19(7):1039-1045                | non pertinent |
| 6296 | De Leeuw et al.,          | 2008 | Pain practice. 2008; 8(4):241-247                                | non pertinent |
| 6297 | De La Garza et al.,       | 2008 | Int J Neuropsychopharmacol. 2008; 11(6):729-741                  | non pertinent |
| 6298 | Davidson et al.,          | 2008 | Reviews in cardiovascular medicine. 2008; 9(SUPPL 1):24-34       | non pertinent |
| 6299 | Cornwell et al.,          | 2008 | Brain Res. 2008; 1244:103-112                                    | non pertinent |
| 6300 | Cornuz et al.,            | 2008 | PLoS One. 2008; 3(6):e2547                                       | non pertinent |
| 6301 | Cok et al.,               | 2008 | Acta anaesthesiologica belgica. 2008; 59(1):27-32                | non pertinent |
| 6302 | Codipietro et al.,        | 2008 | Pediatrics. 2008; 122(3):e716-721                                | non pertinent |
| 6303 | Chuang et al.,            | 2008 | J Clin Neurosci. 2008; 15(11):1210-1215                          | non pertinent |
| 6304 | Chotpitayasunondh et al., | 2008 | PLoS One. 2008; 3(12):e4028                                      | non pertinent |
| 6305 | Chacko et al.,            | 2008 | J Pediatr Adolesc Gynecol. 2008; 21(4):187-193                   | non pertinent |
| 6306 | Cerqueira et al.,         | 2008 | JACC Cardiovasc Imaging. 2008; 1(3):307-316                      | non pertinent |
| 6307 | Casey et al.,             | 2008 | Psychopharmacology. 2008; 200(3):317-331                         | non pertinent |
| 6308 | Casale et al.,            | 2008 | Neuroreport. 2008; 19(16):1633-1636                              | non pertinent |
| 6309 | Casajuana et al.,         | 2008 | BMC blood disorders. 2008; 8:1TN:NCT00137579/ClinicalTrials.gov. | non pertinent |
| 6310 | Cartwright et al.,        | 2008 | Clinical colorectal cancer. 2008; 7(6):390-397                   | non pertinent |
| 6311 | Carneiro et al.,          | 2008 | Rev Bras Anesthesiol. 2008; 58(6):569-581                        | non pertinent |
| 6312 | Carey et al.,             | 2008 | Neurorehabil Neural Repair. 2008; 22(2):185-192                  | non pertinent |
| 6313 | Carbajal et al.,          | 2008 | Pediatrics. 2008; 121(6):e1591-1598                              | non pertinent |

|      |                     |      |                                                                                      |               |
|------|---------------------|------|--------------------------------------------------------------------------------------|---------------|
| 6314 | Calabrese et al.,   | 2008 | J of alternative and complementary medicine (New York, N.Y.). 2008; 14(6):707-713    | non pertinent |
| 6315 | Cakan et al.,       | 2008 | J of neurosurgical anesthesiology. 2008; 20(3):169-173                               | non pertinent |
| 6316 | Bryant et al.,      | 2008 | J of psychiatry & neuroscience. 2008; 33(2):142-146                                  | non pertinent |
| 6317 | Brandt et al.,      | 2008 | European j of obstetrics, gynecology, and reproductive biology. 2008; 141(2):158-162 | non pertinent |
| 6318 | Boggio et al.,      | 2008 | Eur J Neurol. 2008; 15(10):1124-1130                                                 | non pertinent |
| 6319 | Bodsworth et al.,   | 2008 | Sexual health. 2008; 5(3):219-225                                                    | non pertinent |
| 6320 | Bjorkman et al.,    | 2008 | Aging clinical and experimental research. 2008; 20(4):315-321                        | non pertinent |
| 6321 | Bhagat et al.,      | 2008 | Anesth Analg. 2008; 107(4):1348-1355                                                 | non pertinent |
| 6322 | Berman et al.,      | 2008 | J Neurosci. 2008; 28(2):349-359                                                      | non pertinent |
| 6323 | Belavy et al.,      | 2008 | Spine (Phila Pa 1976). 2008; 33(5):E121-131                                          | non pertinent |
| 6324 | Behets et al.,      | 2008 | Sexually transmitted diseases. 2008; 35(9):818-826                                   | non pertinent |
| 6325 | Baumgartner et al., | 2008 | Neuron. 2008; 58(4):639-650                                                          | non pertinent |
| 6326 | Batra et al.,       | 2008 | Biological psychiatry. 2008; 63(12):1178-1184                                        | non pertinent |
| 6327 | Barkay et al.,      | 2008 | Surgical endoscopy. 2008; 22(9):1971-1976                                            | non pertinent |
| 6328 | Barakat et al.,     | 2008 | Anesth Analg. 2008; 106(3):823-829                                                   | non pertinent |
| 6329 | Banzett et al.,     | 2008 | Am J Respir Crit Care Med. 2008; 177(12):1384-1390                                   | non pertinent |
| 6330 | Balconi et al.,     | 2008 | International j of neuroscience. 2008; 118(10):1412-1424                             | non pertinent |

|      |                   |      |                                                                                             |               |
|------|-------------------|------|---------------------------------------------------------------------------------------------|---------------|
| 6331 | Babiloni et al.,  | 2008 | Brain Res Bull.<br>2008; 75(5):581-590                                                      | non pertinent |
| 6332 | Babiloni et al.,  | 2008 | J Pain. 2008;<br>9(10):902-911                                                              | non pertinent |
| 6333 | Ash et al.,       | 2008 | AJNR Am J<br>Neuroradiol. 2008;<br>29(6):1098-1103                                          | non pertinent |
| 6334 | Arle et al.,      | 2008 | J Neurosurg. 2008;<br>109(1):133-139                                                        | non pertinent |
| 6335 | Arai et al.,      | 2008 | J of cancer<br>research and<br>clinical oncology.<br>2008;<br>134(12):1385-1396             | non pertinent |
| 6336 | Apostol et al.,   | 2008 | Headache. 2008;<br>48(7):1012-1025                                                          | non pertinent |
| 6337 | Andersen et al.,  | 2008 | Exp Brain Res.<br>2008; 191(3):371-382                                                      | non pertinent |
| 6338 | Al'Absi et al.,   | 2008 | Psychosom Med.<br>2008; 70(8):928-935                                                       | non pertinent |
| 6339 | Aggarwal et al.,  | 2008 | Indian j of medical<br>sciences. 2008;<br>62(5):179-184                                     | non pertinent |
| 6340 | Addeo et al.,     | 2008 | Cancer. 2008;<br>113(9):2524-2531                                                           | non pertinent |
| 6341 | Abulmagd et al.,  | 2008 | Egyptian j of<br>anaesthesia. 2008;<br>24(2):153-159                                        | non pertinent |
| 6342 | Aasvang et al.,   | 2008 | Anesthesia and<br>Analgesia. 2008;<br>107(1):282-291                                        | non pertinent |
| 6343 | Zimbroff et al.,  | 2007 | International<br>clinical<br>psychopharmacol<br>ogy. 2007;<br>22(6):363-370                 | non pertinent |
| 6344 | Zhou et al.,      | 2007 | Pediatric<br>infectious disease<br>j. 2007;<br>26(11):1001-1005                             | non pertinent |
| 6345 | Zaba et al.,      | 2007 | CNS Drugs. 2007;<br>21(2):165-171                                                           | non pertinent |
| 6346 | Yu et al.,        | 2007 | Am J Chin Med.<br>2007; 35(6):937-945                                                       | non pertinent |
| 6347 | Yang et al.,      | 2007 | Br J Anaesth.<br>2007; 98(4):515-518                                                        | non pertinent |
| 6348 | Yamashiro et al., | 2007 | J Neurol Neurosurg<br>Psychiatry. 2007;<br>78(5):497-500                                    | non pertinent |
| 6349 | Xiao et al.,      | 2007 | J of clinical<br>rehabilitative<br>tissue engineering<br>research. 2007;<br>11(8):1443-1446 | non pertinent |

|      |                             |      |                                                                                              |               |
|------|-----------------------------|------|----------------------------------------------------------------------------------------------|---------------|
| 6350 | Wu et al.,                  | 2007 | Zhonghua shao<br>shang za zhi<br>(Chinese j of<br>burns). 2007;<br>23(6):440-443             | non pertinent |
| 6351 | Wu et al.,                  | 2007 | Helicobacter.<br>2007; 12(6):633-<br>637                                                     | non pertinent |
| 6352 | White et al.,               | 2007 | Clinical J of Pain.<br>2007; 23(8):714-<br>719                                               | non pertinent |
| 6353 | Watson et al.,              | 2007 | Neuroreport.<br>2007; 18(8):771-<br>775                                                      | non pertinent |
| 6354 | Wang et al.,                | 2007 | J Altern<br>Complement<br>Med. 2007;<br>13(2):241-246                                        | non pertinent |
| 6355 | Wang et al.,                | 2007 | Anesth Analg.<br>2007; 104(2):325-<br>331                                                    | non pertinent |
| 6356 | Wang et al.,                | 2007 | J of clinical<br>rehabilitative<br>tissue engineering<br>research. 2007;<br>11(28):5536-5539 | non pertinent |
| 6357 | Von Arnim et al.,           | 2007 | American j of<br>gastroenterology.<br>2007; 102(6):1268-<br>1275                             | non pertinent |
| 6358 | Vandenberghe et<br>al.,     | 2007 | Gastroenterology.<br>2007; 132(5):1684-<br>1693                                              | non pertinent |
| 6359 | Van Der Veen et<br>al.,     | 2007 | Neuropsychophar<br>macology. 2007;<br>32(1):216-224                                          | non pertinent |
| 6360 | Vad et al.,                 | 2007 | Arch Phys Med<br>Rehabil. 2007;<br>88(5):577-582                                             | non pertinent |
| 6361 | Tursi et al.,               | 2007 | Medical science<br>monitor. 2007;<br>13(4):CR187-190                                         | non pertinent |
| 6362 | Torisu et al.,              | 2007 | Clin Neurophysiol.<br>2007; 118(5):999-<br>1009                                              | non pertinent |
| 6363 | Tekin et al.,               | 2007 | Current<br>therapeutic<br>reseach – clinical<br>and experimental.<br>2007; 68(5):313-<br>324 | non pertinent |
| 6364 | Takahashi-Yanaga<br>et al., | 2007 | J of<br>pharmacological<br>sciences. 2007;<br>104(4):293-302                                 | non pertinent |
| 6365 | Suzuki et al.,              | 2007 | Arch Oral Biol.<br>2007; 52(8):797-<br>802                                                   | non pertinent |
| 6366 | Struys et al.,              | 2007 | Br J Anaesth.<br>2007; 99(3):359-<br>367                                                     | non pertinent |

|      |                           |      |                                                            |               |
|------|---------------------------|------|------------------------------------------------------------|---------------|
| 6367 | Stravodimos et al.,       | 2007 | International urology and nephrology. 2007; 39(3):893-896  | non pertinent |
| 6368 | Staud et al.,             | 2007 | Pain. 2007; 129(1-2):130-142                               | non pertinent |
| 6369 | Skouteri et al.,          | 2007 | Acta anaesthesiologica belgica. 2007; 58(3):169-175        | non pertinent |
| 6370 | Sinis et al.,             | 2007 | Clin J Pain. 2007; 23(3):237-243                           | non pertinent |
| 6371 | Silvanto et al.,          | 2007 | Acta anaesthesiologica Scandinavica. 2007; 51(9):1147-1154 | non pertinent |
| 6372 | Siemer et al.,            | 2007 | European urology. 2007; 52(4):1156-1163                    | non pertinent |
| 6373 | Sesti et al.,             | 2007 | Fertility and sterility. 2007; 88(6):1541-1547             | non pertinent |
| 6374 | Seidel et al.,            | 2007 | Rheumatology international. 2007; 27(11):1025-1030         | non pertinent |
| 6375 | Schmidt et al.,           | 2007 | Anesthesiology. 2007; 106(4):707-714                       | non pertinent |
| 6376 | Schienle et al.,          | 2007 | Eur Arch Psychiatry Clin Neurosci. 2007; 257(8):486-493    | non pertinent |
| 6377 | Sansone-Parsons et al.,   | 2007 | Pharmacotherapy . 2007; 27(6):825-834                      | non pertinent |
| 6378 | Sänger et al.,            | 2007 | European j of pediatrics. 2007; 166(12):1229-1236          | non pertinent |
| 6379 | Saletu et al.,            | 2007 | Neuropsychobiology. 2007; 55(3-4):184-193                  | non pertinent |
| 6380 | Saarela et al.,           | 2007 | Cereb Cortex. 2007; 17(1):230-237                          | non pertinent |
| 6381 | Saad et al.,              | 2007 | Clinical genitourinary cancer. 2007; 5(6):390-396          | non pertinent |
| 6382 | Rudick et al.,            | 2007 | Ann Neurol. 2007; 62(4):335-346                            | non pertinent |
| 6383 | Rodriguez-Navarro et al., | 2007 | Anesthesiology. 2007; 106(2):339-345                       | non pertinent |
| 6384 | Robertson et al.,         | 2007 | J Clin Psychiatry. 2007; 68(2):261-267                     | non pertinent |
| 6385 | Robbins et al.,           | 2007 | Clinical therapeutics. 2007; 29(11):2349-2364              | non pertinent |

|      |                         |      |                                                                                   |               |
|------|-------------------------|------|-----------------------------------------------------------------------------------|---------------|
| 6386 | Rios et al.,            | 2007 | Neurourology and urodynamics. 2007; 26(6):773-778                                 | non pertinent |
| 6387 | Ringe et al.,           | 2007 | Rheumatology international. 2007; 27(5):425-434                                   | non pertinent |
| 6388 | Ray et al.,             | 2007 | J Physiol. 2007; 585(Pt 1):287-294                                                | non pertinent |
| 6389 | Rauck et al.,           | 2007 | J of opioid management. 2007; 3(1):35-43                                          | non pertinent |
| 6390 | Rahman Al-Refai et al., | 2007 | Minerva Anestesiologica. 2007; 73(4):219-223                                      | non pertinent |
| 6391 | Quan et al.,            | 2007 | Zhongguo yi xue ke xue bao. Acta academiae medicinae sinicae. 2007; 29(1):107-110 | non pertinent |
| 6392 | Prevenzano et al.,      | 2007 | Clinical nephrology. 2007; 67(5):306-317                                          | non pertinent |
| 6393 | Price et al.,           | 2007 | Pain. 2007; 127(1-2):63-72                                                        | non pertinent |
| 6394 | Prairie et al.,         | 2007 | Contraception. 2007; 76(5):383-388                                                | non pertinent |
| 6395 | Phillips et al.,        | 2007 | J Oral Maxillofac Surg. 2007; 65(6):1162-1173                                     | non pertinent |
| 6396 | Patrocinio et al.,      | 2007 | Brazilian j of otorhinolaryngology. 2007; 73(3):339-342                           | non pertinent |
| 6397 | Patil et al.,           | 2007 | Nature medicine. 2007; 13(9):1102-1107                                            | non pertinent |
| 6398 | Passard et al.,         | 2007 | Brain. 2007; 130(Pt 10):2661-2670                                                 | non pertinent |
| 6399 | Park et al.,            | 2007 | Current treatment options in cardiovascular medicine. 2007; 9(1):37-45            | non pertinent |
| 6400 | Park et al.,            | 2007 | Nuclear medicine communications. 2007; 28(10):766-770                             | non pertinent |
| 6401 | Papp et al.,            | 2007 | J of cutaneous medicine and surgery. 2007; 11(2):57-66                            | non pertinent |
| 6402 | Oz et al.,              | 2007 | Saudi medical j. 2007; 28(7):1055-1058                                            | non pertinent |
| 6403 | Ondo et al.,            | 2007 | Clinical neuropharmacology. 2007; 30(5):295-300                                   | non pertinent |

|      |                           |      |                                                                                                     |               |
|------|---------------------------|------|-----------------------------------------------------------------------------------------------------|---------------|
| 6404 | Oncken et al.,            | 2007 | Addict Behav.<br>2007; 32(2):296-309                                                                | non pertinent |
| 6405 | Omer et al.,              | 2007 | Phytomedicine.<br>2007; 14(2-3):87-95                                                               | non pertinent |
| 6406 | Ochia et al.,             | 2007 | Spine. 2007;<br>32(13):1394-1399                                                                    | non pertinent |
| 6407 | Norbury et al.,           | 2007 | British j of<br>psychiatry. 2007;<br>190(JUNE):531-532                                              | non pertinent |
| 6408 | Niddam et al.,            | 2007 | Clin J Pain. 2007;<br>23(5):440-448                                                                 | non pertinent |
| 6409 | Nct – NuVasive            | 2007 | National Library of<br>Medicine. 2007                                                               | non pertinent |
| 6410 | Nct – Redaelli            | 2007 | National Library of<br>Medicine. 2007                                                               | non pertinent |
| 6411 | Nct – Fitzgerald          | 2007 | National Library of<br>Medicine. 2007                                                               | non pertinent |
| 6412 | Nct – Brefel-<br>Courbon  | 2007 | National Library of<br>Medicine. 2007                                                               | non pertinent |
| 6413 | Nct – Kusek               | 2007 | National Library of<br>Medicine. 2007                                                               | non pertinent |
| 6414 | Nct - Bell                | 2007 | National Library of<br>Medicine. 2007                                                               | non pertinent |
| 6415 | Nct – Barber              | 2007 | National Library of<br>Medicine. 2007                                                               | non pertinent |
| 6416 | Nct – Avery               | 2007 | National Library of<br>Medicine. 2007                                                               | non pertinent |
| 6417 | Nct - Morone              | 2007 | National Library of<br>Medicine. 2007                                                               | non pertinent |
| 6418 | Napadow et al.,           | 2007 | Pain. 2007;<br>130(3):254-266                                                                       | non pertinent |
| 6419 | Nagy et al.,              | 2007 | J of B. O. ON. 2007;<br>389-394                                                                     | non pertinent |
| 6420 | Moréot-Panzini et<br>al., | 2007 | J of<br>neurophysiology.<br>2007; 97(2):1396-1404                                                   | non pertinent |
| 6421 | Miskowiak et al.,         | 2007 | Biol Psychiatry.<br>2007; 62(11):1244-1250                                                          | non pertinent |
| 6422 | Miner et al.,             | 2007 | J Emerg Med.<br>2007; 32(3):249-255                                                                 | non pertinent |
| 6423 | Messier et al.,           | 2007 | Osteoarthritis and<br>cartilage. 2007;<br>15(11):1256-1266                                          | non pertinent |
| 6424 | Mehrkens et al.,          | 2007 | Acta Neurochir<br>Suppl. 2007; 97(Pt 2):91-97                                                       | non pertinent |
| 6425 | Mathias et al.,           | 2007 | Clinical<br>therapeutics.<br>2007; 29(5):950-962                                                    | non pertinent |
| 6426 | Mason et al.,             | 2007 | Exp Brain Res.<br>2007; 182(1):81-91                                                                | non pertinent |
| 6427 | Marson et al.,            | 2007 | Health technology<br>assessment<br>(Winchester,<br>England). 2007;<br>11(37):iii-iv, ix-x,<br>1-134 | non pertinent |



|      |                       |      |                                                               |               |
|------|-----------------------|------|---------------------------------------------------------------|---------------|
| 6428 | Marier et al.,        | 2007 | J of clinical pharmacology. 2007; 47(11):1381-1389            | non pertinent |
| 6429 | Maihofner et al.,     | 2007 | Eur J Neurosci. 2007; 26(5):1344-1356                         | non pertinent |
| 6430 | Madisch et al.,       | 2007 | International j of colorectal disease. 2007; 22(12):1445-1451 | non pertinent |
| 6431 | Ma et al.,            | 2007 | Cancer chemotherapy and pharmacology. 2007; 59(2):207-215     | non pertinent |
| 6432 | Lundquist             | 2007 | Advances in therapy. 2007; 24(2):333-345                      | non pertinent |
| 6433 | Lundahl et al.,       | 2007 | Psychopharmacology (Berl). 2007; 195(1):139-146               | non pertinent |
| 6434 | Loo et al.,           | 2007 | Singapore medical j. 2007; 48(9):834-839                      | non pertinent |
| 6435 | Ledowski et al.,      | 2007 | Br J Anaesth. 2007; 99(4):547-551                             | non pertinent |
| 6436 | Le Pera et al.,       | 2007 | Eur J Neurosci. 2007; 25(6):1900-1907                         | non pertinent |
| 6437 | Lanzi et al.,         | 2007 | Psychopathology. 2007; 40(1):1-7                              | non pertinent |
| 6438 | Kujundzic et al.,     | 2007 | J of surgical oncology. 2007; 96(6):518-524                   | non pertinent |
| 6439 | Krzeski et al.,       | 2007 | Arthritis research & therapy. 2007; 9(5):R109                 | non pertinent |
| 6440 | Kramer et al.,        | 2007 | Pain. 2007; 133(1-3):72-78                                    | non pertinent |
| 6441 | Korostenskaja et al., | 2007 | Brain Res Bull. 2007; 72(4-6):275-283                         | non pertinent |
| 6442 | Ko et al.,            | 2007 | J of musculoskeletal pain. 2007; 15(1):11-19                  | non pertinent |
| 6443 | Klausner et al.,      | 2007 | Current medical research and opinion. 2007; 23(11):2637-2645  | non pertinent |
| 6444 | Klarenbeek et al.,    | 2007 | BMC Surg. 2007; 7:16                                          | non pertinent |
| 6445 | Kiss et al.,          | 2007 | Brain. 2007; 130(Pt 11):2879-2886                             | non pertinent |
| 6446 | Kisicki et al.,       | 2007 | Clinical therapeutics. 2007; 29(9):1967-1979                  | non pertinent |
| 6447 | Kim et al.,           | 2007 | Clinical therapeutics. 2007; 29(9):1924-1936                  | non pertinent |

|      |                          |      |                                                                                    |               |
|------|--------------------------|------|------------------------------------------------------------------------------------|---------------|
| 6448 | Khaw et al.,             | 2007 | Ophthalmology.<br>2007;<br>114(10):1822-<br>1830                                   | non pertinent |
| 6449 | Kettenmann et<br>al.,    | 2007 | Clin J Pain. 2007;<br>23(8):663-668                                                | non pertinent |
| 6450 | Kazemisaeid et<br>al.,   | 2007 | Indian heart j.<br>2007; 59(6):454-<br>458                                         | non pertinent |
| 6451 | Karlsen et al.,          | 2007 | J Endourol. 2007;<br>21(1):28-33                                                   | non pertinent |
| 6452 | Kang et al.,             | 2007 | Helicobacter.<br>2007; 12(6):623-<br>628                                           | non pertinent |
| 6453 | Jabbari                  | 2007 | Current pain and<br>headache reports.<br>2007; 11(5):352-<br>358                   | non pertinent |
| 6454 | Ito et al.,              | 2007 | Muscle & nerve.<br>2007; 35(3):379-<br>382                                         | non pertinent |
| 6455 | Isrctn - Levine          | 2007 | ISRCTN Registry.<br>2007                                                           | non pertinent |
| 6456 | Ingelmo et al.,          | 2007 | Paediatric<br>anaesthesia. 2007;<br>17(12):1166-1175                               | non pertinent |
| 6457 | Hunt et al.,             | 2007 | J of behavior<br>therapy and<br>experimental<br>psychiatry. 2007;<br>38(4):329-344 | non pertinent |
| 6458 | Hui et al.,              | 2007 | BMC<br>Complement<br>Altern Med. 2007;<br>7:33                                     | non pertinent |
| 6459 | Horsley et al.,          | 2007 | Aust J Physiother.<br>2007; 53(4):239-<br>245                                      | non pertinent |
| 6460 | Hoff et al.,             | 2007 | Scand J<br>Gastroenterol.<br>2007; 42(7):885-<br>889                               | non pertinent |
| 6461 | Hirsh et al.,            | 2007 | Trials. 2007; 8                                                                    | non pertinent |
| 6462 | Hemmeter et al.,         | 2007 | J Psychiatr Res.<br>2007; 41(10):876-<br>884                                       | non pertinent |
| 6463 | Hatem et al.,            | 2007 | Clin Neurophysiol.<br>2007; 118(7):1503-<br>1516                                   | non pertinent |
| 6464 | Harrison et al.,         | 2007 | J of clinical<br>pharmacology.<br>2007; 47(8):962-<br>969                          | non pertinent |
| 6465 | Hamann et al.,           | 2007 | J of opioid<br>management.<br>2007; 3(3):137-<br>143                               | non pertinent |
| 6466 | Hagenbach et al.,        | 2007 | Spinal Cord. 2007;<br>45(8):551-562                                                | non pertinent |
| 6467 | Haavik-Taylor et<br>al., | 2007 | Clinical<br>Neurophysiology.<br>2007; 118(2):391-<br>402                           | non pertinent |

|      |                          |      |                                                                                                         |               |
|------|--------------------------|------|---------------------------------------------------------------------------------------------------------|---------------|
| 6468 | Gurpegui et al.,         | 2007 | European<br>neuropsychophar<br>macology. 2007;<br>17(11):725-734                                        | non pertinent |
| 6469 | Guedj et al.,            | 2007 | European j of<br>nuclear medicine<br>and molecular<br>imaging. 2007;<br>34(12):2115-2119                | non pertinent |
| 6470 | Gross et al.,            | 2007 | J of the european<br>academy of<br>dermatology and<br>venereology :<br>JEADV. 2007;<br>21(10):1404-1412 | non pertinent |
| 6471 | Gridelli et al.,         | 2007 | Lancet Oncol.<br>2007; 8(6):500-<br>512                                                                 | non pertinent |
| 6472 | Gordon et al.,           | 2007 | J of neuroscience<br>methods. 2007;<br>159(2):300-307                                                   | non pertinent |
| 6473 | Goossens et al.,         | 2007 | Biol Psychiatry.<br>2007; 62(10):1119-<br>1125                                                          | non pertinent |
| 6474 | Glassman et al.,         | 2007 | Spine. 2007;<br>32(15):1693-1698                                                                        | non pertinent |
| 6475 | Giamberardino et<br>al., | 2007 | J of Pain. 2007;<br>8(11):869-878                                                                       | non pertinent |
| 6476 | Ghosh et al.,            | 2007 | J of the indian<br>medical<br>association. 2007;<br>105(5):260-262                                      | non pertinent |
| 6477 | Ghafoor et al.,          | 2007 | American j of<br>health-system<br>pharmacy. 2007;<br>64(23):2447-2461                                   | non pertinent |
| 6478 | Gerich et al.,           | 2007 | Current medical<br>research and<br>opinion. 2007;<br>23(8):1791-1798                                    | non pertinent |
| 6479 | George et al.,           | 2007 | Schizophrenia<br>research. 2007;<br>93(1-3):42-50                                                       | non pertinent |
| 6480 | Geha et al.,             | 2007 | Pain. 2007; 128(1-<br>2):88-100                                                                         | non pertinent |
| 6481 | Gega et al.,             | 2007 | International j of<br>nursing studies.<br>2007; 44(3):397-<br>405                                       | non pertinent |
| 6482 | Gau et al.,              | 2007 | J of child and<br>adolescent<br>psychopharmacol<br>ogy. 2007;<br>17(4):447-460                          | non pertinent |
| 6483 | Garside et al.,          | 2007 | Health technology<br>assessment. 2007;<br>11(45):iii-128                                                | non pertinent |
| 6484 | Ga et al.,               | 2007 | J of rehabilitation<br>medicine. 2007;<br>39(5):374-378                                                 | non pertinent |
| 6485 | Franken et al.,          | 2007 | Alcohol Clin Exp<br>Res. 2007;<br>31(6):919-927                                                         | non pertinent |

|      |                             |      |                                                                            |               |
|------|-----------------------------|------|----------------------------------------------------------------------------|---------------|
| 6486 | Filipov et al.,             | 2007 | Anaesthesiology and intensive care. 2007; 34(4):3-13                       | non pertinent |
| 6487 | Ferreira et al.,            | 2007 | Pain. 2007; 131(1-2):31-37                                                 | non pertinent |
| 6488 | Fernández-Montequin et al., | 2007 | International wound j. 2007; 4(4):333-343                                  | non pertinent |
| 6489 | Euctr, I.T.                 | 2007 | EU Clinical Trials Register. 2007                                          | non pertinent |
| 6490 | Etienne-Grimaldi et al.,    | 2007 | Clinical pharmacokinetics. 2007; 46(11):953-963                            | non pertinent |
| 6491 | Ekman et al.,               | 2007 | Anesth Analg. 2007; 105(3):688-695                                         | non pertinent |
| 6492 | Dubey et al.,               | 2007 | American j of respiratory and critical care medicine. 2007; 175(9):868-874 | non pertinent |
| 6493 | Driessen et al.,            | 2007 | BMC Psychiatry. 2007; 7:58                                                 | non pertinent |
| 6494 | Down et al.,                | 2007 | British j of sports medicine. 2007; 41(8):501-505                          | non pertinent |
| 6495 | Donati et al.,              | 2007 | Seizure. 2007; 16(8):670-679                                               | non pertinent |
| 6496 | Domes et al.,               | 2007 | Biological psychiatry. 2007; 62(10):1187-1190                              | non pertinent |
| 6497 | DiPalma et al.,             | 2007 | Southern medical j. 2007; 100(11):1085-1090                                | non pertinent |
| 6498 | Dicko et al.,               | 2007 | PLoS One. 2007; 2(10):e1045                                                | non pertinent |
| 6499 | Dib et al.,                 | 2007 | Brazilian j of otorhinolaryngology. 2007; 73(3):390-397                    | non pertinent |
| 6500 | Dawood et al.,              | 2007 | American j of obstetrics and gynecology. 2007; 196(1):35.e31-35            | non pertinent |
| 6501 | Dall'Era et al.,            | 2007 | Arthritis and rheumatism. 2007; 56(12):4142-                               | non pertinent |
| 6502 | Curry et al.,               | 2007 | J of emergency medicine. 2007; 33(4):407-411                               | non pertinent |
| 6503 | Couppé et al.,              | 2007 | Clinical J of Pain. 2007; 23(1):23-27                                      | non pertinent |
| 6504 | Conklin et al.,             | 2007 | J of pediatric psychology. 2007; 32(9):1127-1139                           | non pertinent |
| 6505 | Cole                        | 2007 | Current pain and headache reports. 2007; 11(2):89-92                       | non pertinent |
| 6506 | Citrome et al.,             | 2007 | International clinical psychopharmacology. 2007; 22(6):356-362             | non pertinent |

|      |                   |      |                                                                                            |               |
|------|-------------------|------|--------------------------------------------------------------------------------------------|---------------|
| 6507 | Chung et al.,     | 2007 | Annals of surgery.<br>2007; 246(5):728-733                                                 | non pertinent |
| 6508 | Choi et al.,      | 2007 | Helicobacter.<br>2007; 12(6):638-642                                                       | non pertinent |
| 6509 | Chiappori et al., | 2007 | Clinical cancer<br>research. 2007;<br>13(7):2091-2099                                      | non pertinent |
| 6510 | Ceballos et al.,  | 2007 | Biol Psychol.<br>2007; 74(3):414-416                                                       | non pertinent |
| 6511 | Cavusoglu et al., | 2007 | Turk Neurosurg.<br>2007; 17(2):100-108                                                     | non pertinent |
| 6512 | Caumo et al.,     | 2007 | Anesthesia and<br>Analgesia. 2007;<br>105(5):1263-1271                                     | non pertinent |
| 6513 | Caliskan et al.,  | 2007 | European j of<br>contraception &<br>reproductive<br>health care. 2007;<br>12(4):372-377    | non pertinent |
| 6514 | Buxbaum et al.,   | 2007 | American j of<br>physical medicine<br>& rehabilitation.<br>2007; 86(7):527-537             | non pertinent |
| 6515 | Butts et al.,     | 2007 | J of clinical<br>oncology. 2007;<br>25(36):5777-5784                                       | non pertinent |
| 6516 | Busch et al.,     | 2007 | Cephalalgia. 2007;<br>27(2):165-172                                                        | non pertinent |
| 6517 | Busch et al.,     | 2007 | Cephalalgia. 2007;<br>27(11):1206-1214                                                     | non pertinent |
| 6518 | Brown et al.,     | 2007 | Calcified tissue<br>international.<br>2007; 81(5):341-351                                  | non pertinent |
| 6519 | Britton et al.,   | 2007 | CNS Spectr. 2007;<br>12(8):600-605                                                         | non pertinent |
| 6520 | Brearley et al.,  | 2007 | International j of<br>clinical<br>pharmacology and<br>therapeutics.<br>2007; 45(6):307-318 | non pertinent |
| 6521 | Borner et al.,    | 2007 | Der Anaesthesist.<br>2007; 56(11):1120-1127                                                | non pertinent |
| 6522 | Borckardt et al., | 2007 | Pain Res Manag.<br>2007; 12(4):287-290                                                     | non pertinent |
| 6523 | Bonnema et al.,   | 2007 | J Clin Endocrinol<br>Metab. 2007;<br>92(9):3424-3428                                       | non pertinent |
| 6524 | Bonhomme et al.,  | 2007 | J of neurosurgical<br>anesthesiology.<br>2007; 19(1):49-55                                 | non pertinent |

|      |                   |      |                                                                        |               |
|------|-------------------|------|------------------------------------------------------------------------|---------------|
| 6525 | Bone et al.,      | 2007 | J of clinical endocrinology and metabolism. 2007; 92(12):4671-4677     | non pertinent |
| 6526 | Boly et al.,      | 2007 | Proc Natl Acad Sci U S A. 2007; 104(29):12187-12192                    | non pertinent |
| 6527 | Boddaert et al.,  | 2007 | Blood. 2007; 110(1):401-408                                            | non pertinent |
| 6528 | Block et al.,     | 2007 | Antimicrobial agents and chemotherapy. 2007; 51(11):4001-4008          | non pertinent |
| 6529 | Blanchard et al., | 2007 | Behav Res Ther. 2007; 45(4):633-648                                    | non pertinent |
| 6530 | Biasiotta et al., | 2007 | Clin Neurophysiol. 2007; 118(10):2180-2188                             | non pertinent |
| 6531 | Bennell et al.,   | 2007 | BMC Musculoskelet Disord. 2007; 8:96                                   | non pertinent |
| 6532 | Becker et al.,    | 2007 | Hepatology (baltimore, md.). 2007; 45(1):9-15                          | non pertinent |
| 6533 | Bays et al.,      | 2007 | Diabetes & vascular disease research. 2007; 4(3):181-193               | non pertinent |
| 6534 | Barst             | 2007 | Expert opinion on pharmacotherapy. 2007; 8(1):95-109                   | non pertinent |
| 6535 | Barbanoj et al.,  | 2007 | Neuropsychobiology. 2007; 55(3-4):203-212                              | non pertinent |
| 6536 | Bangs et al.,     | 2007 | J of child and adolescent psychopharmacology. 2007; 17(4):407-420      | non pertinent |
| 6537 | Babiloni et al.,  | 2007 | Brain Res Bull. 2007; 71(5):475-484                                    | non pertinent |
| 6538 | Azzaro et al.,    | 2007 | J of clinical pharmacology. 2007; 47(8):978-990                        | non pertinent |
| 6539 | Ashwin et al.,    | 2007 | Neuropsychologia. 2007; 45(1):2-14                                     | non pertinent |
| 6540 | Arntz et al.,     | 2007 | J of behavior therapy and experimental psychiatry. 2007; 38(4):345-370 | non pertinent |
| 6541 | Apte et al.,      | 2007 | Ophthalmology. 2007; 114(9):1702-1712                                  | non pertinent |
| 6542 | Anderson et al.,  | 2007 | Neuroreport. 2007; 18(13):1351-1355                                    | non pertinent |

|      |                     |      |                                                                                                                          |               |
|------|---------------------|------|--------------------------------------------------------------------------------------------------------------------------|---------------|
| 6543 | Akcaboy et al.,     | 2007 | Saudi medical j.<br>2007; 28(10):1550-1554                                                                               | non pertinent |
| 6544 | Aidar et al.,       | 2007 | Revista de neurologia. 2007; 45(9):518-522                                                                               | non pertinent |
| 6545 | - No authors listed | 2007 | Drugs in r and d. 2007; 8(1):61-68                                                                                       | non pertinent |
| 6546 | Zubieta et al.,     | 2006 | Brain Behav Immun. 2006; 20(1):15-26                                                                                     | non pertinent |
| 6547 | Zohnhöfer et al.,   | 2006 | Jama. 2006; 295(9):1003-1010                                                                                             | non pertinent |
| 6548 | Zhou et al.,        | 2006 | Respirology (carlton, vic.). 2006; 11(5):603-610                                                                         | non pertinent |
| 6549 | Zepp et al.,        | 2006 | J of pediatrics. 2006; 149(5):603-610                                                                                    | non pertinent |
| 6550 | Yuen et al.,        | 2006 | Antiviral therapy. 2006; 11(8):977-983                                                                                   | non pertinent |
| 6551 | Yakhno et al.,      | 2006 | Clinical drug investigation. 2006; 26(5):267-277                                                                         | non pertinent |
| 6552 | Xiong et al.,       | 2006 | Brazilian j of medical and biological research = revista brasileira de pesquisas medicas e biologicas. 2006; 39(1):85-90 | non pertinent |
| 6553 | Wu et al.,          | 2006 | European j of clinical investigation. 2006; 36(11):803-809                                                               | non pertinent |
| 6554 | Wright et al.       | 2006 | Neuroimage. 2006; 29(2):628-636                                                                                          | non pertinent |
| 6555 | Wright et al.       | 2006 | Health technology assessment. 2006; 10(21):iii-93                                                                        | non pertinent |
| 6556 | Wolfs et al.,       | 2006 | BMC musculoskeletal disorders. 2006; 7:14                                                                                | non pertinent |
| 6557 | Witting et al.,     | 2006 | Pain. 2006; 120(1-2):145-154                                                                                             | non pertinent |
| 6558 | Winner et al.,      | 2006 | Headache. 2006; 46(2):212-222                                                                                            | non pertinent |
| 6559 | Winner et al.,      | 2006 | Clinical therapeutics. 2006; 28(10):1582-1591                                                                            | non pertinent |
| 6560 | Winhusen et al.,    | 2006 | Pharmacology, biochemistry, and behavior. 2006; 85(1):29-38                                                              | non pertinent |
| 6561 | Williams et al.,    | 2006 | Neuroimage. 2006; 29(2):347-357                                                                                          | non pertinent |

|      |                        |      |                                                                                      |               |
|------|------------------------|------|--------------------------------------------------------------------------------------|---------------|
| 6562 | Williams et al.,       | 2006 | J Neurosci. 2006; 26(36):9264-9271                                                   | non pertinent |
| 6563 | Williams et al.,       | 2006 | Health technology assessment (Winchester, England). 2006; 10(40):iii-iv, ix-x, 1-195 | non pertinent |
| 6564 | Wilens et al.,         | 2006 | Archives of pediatrics & adolescent medicine. 2006; 160(1):82-90                     | non pertinent |
| 6565 | Wilder-Smith et al.,   | 2006 | Scandinavian j of gastroenterology. 2006; 41(3):264-273                              | non pertinent |
| 6566 | Wik et al.,            | 2006 | Int J Neurosci. 2006; 116(1):1-8                                                     | non pertinent |
| 6567 | White et al.,          | 2006 | Anesth Analg. 2006; 103(1):76-80                                                     | non pertinent |
| 6568 | Weisler et al.,        | 2006 | CNS spectrums. 2006; 11(8):625-639                                                   | non pertinent |
| 6569 | Warpechowski et al.,   | 2006 | Pacing and clinical electrophysiology : PACE. 2006; 29(12):1375-1382                 | non pertinent |
| 6570 | Wang et al.,           | 2006 | J of the chinese medical association. 2006; 69(10):453-460                           | non pertinent |
| 6571 | Walsh et al.,          | 2006 | Sleep medicine. 2006; 7(2):155-161                                                   | non pertinent |
| 6572 | Wallace et al.,        | 2006 | Neuromodulation. 2006; 9(2):75-86                                                    | non pertinent |
| 6573 | Wagner et al.,         | 2006 | J of the American Academy of Child and Adolescent Psychiatry. 2006; 45(3):280-288    | non pertinent |
| 6574 | Viola et al.,          | 2006 | J of diabetes and its complications. 2006; 20(1):34-39                               | non pertinent |
| 6575 | Vinciguerra et al.,    | 2006 | Angiology. 2006; 57(3):331-339                                                       | non pertinent |
| 6576 | Veldhuijzen et al.,    | 2006 | Psychopharmacology (Berl). 2006; 183(4):462-470                                      | non pertinent |
| 6577 | Vejdani et al.,        | 2006 | Digestive diseases and sciences. 2006; 51(8):1501-1507                               | non pertinent |
| 6578 | VanNatta et al.,       | 2006 | American j of gastroenterology. 2006; 101(10):2209-2217                              | non pertinent |
| 6579 | Van der Heijde et al., | 2006 | Arthritis and rheumatism. 2006; 54(4):1063-                                          | non pertinent |



|      |                      |      |                                                                 |               |
|------|----------------------|------|-----------------------------------------------------------------|---------------|
| 6580 | Van Aart et al.,     | 2006 | Thrombosis research. 2006; 118(3):313-320                       | non pertinent |
| 6581 | Valovirta et al.,    | 2006 | Allergy. 2006; 61(10):1177-1183                                 | non pertinent |
| 6582 | Valjus et al.,       | 2006 | Acta Anaesthesiol Scand. 2006; 50(1):32-39                      | non pertinent |
| 6583 | Vaideanu et al.,     | 2006 | British j of ophthalmology. 2006; 90(6):713-717                 | non pertinent |
| 6584 | Usui et al.,         | 2006 | Pain. 2006; 121(3):276-280                                      | non pertinent |
| 6585 | Ustün et al.,        | 2006 | J of oral and maxillofacial surgery. 2006; 64(9):1353-1358      | non pertinent |
| 6586 | Uhl et al.,          | 2006 | Clinical toxicology (Philadelphia, Pa.). 2006; 44 Suppl 1:17-28 | non pertinent |
| 6587 | Tuchman et al.,      | 2006 | CNS Drugs. 2006; 20(12):1019-1026                               | non pertinent |
| 6588 | Tu et al.,           | 2006 | Gastrointestinal endoscopy. 2006; 63(1):87-94                   | non pertinent |
| 6589 | Torradabella et al., | 2006 | Diseases of the colon and rectum. 2006; 49(6):865-868           | non pertinent |
| 6590 | Tomida et al.,       | 2006 | J of glaucoma. 2006; 15(5):349-353                              | non pertinent |
| 6591 | Tohda et al.,        | 2006 | J of asthma. 2006; 43(8):613-618                                | non pertinent |
| 6592 | Titta et al.,        | 2006 | J of sexual medicine. 2006; 3(2):267-273                        | non pertinent |
| 6593 | Thurnher et al.,     | 2006 | Neuroradiology. 2006; 48(11):795-801                            | non pertinent |
| 6594 | Thuluvath et al.,    | 2006 | Alimentary pharmacology & therapeutics. 2006; 24(6):973-982     | non pertinent |
| 6595 | Thom                 | 2006 | J of international medical research. 2006; 34(5):514-519        | non pertinent |
| 6596 | Tfelt-Hansen et al., | 2006 | J of headache and pain. 2006; 7(6):389-394                      | non pertinent |
| 6597 | Teppo et al.,        | 2006 | Clinical otolaryngology. 2006; 31(4):303-309                    | non pertinent |
| 6598 | Taylor et al.,       | 2006 | Retrovirology. 2006; 3:63                                       | non pertinent |
| 6599 | Tauchmanová et al.,  | 2006 | Bone marrow transplantation. 2006; 37(1):81-88                  | non pertinent |

|      |                             |      |                                                                                                                   |               |
|------|-----------------------------|------|-------------------------------------------------------------------------------------------------------------------|---------------|
| 6600 | Tariot et al.,              | 2006 | American j of<br>geriatric<br>psychiatry. 2006;<br>14(9):767-776                                                  | non pertinent |
| 6601 | Tan et al.,                 | 2006 | J of rehabilitation<br>research and<br>development.<br>2006; 43(4):461-<br>474                                    | non pertinent |
| 6602 | Takamatsu et al.,           | 2006 | Br J Anaesth.<br>2006; 96(5):620-<br>626                                                                          | non pertinent |
| 6603 | Tak et al.,                 | 2006 | Child. 2006;<br>32(3):257-268                                                                                     | non pertinent |
| 6604 | Symonds et al.,             | 2006 | J Neurophysiol.<br>2006; 95(6):3823-<br>3830                                                                      | non pertinent |
| 6605 | Swanson et al.,             | 2006 | J of clinical<br>psychiatry. 2006;<br>67(1):137-147                                                               | non pertinent |
| 6606 | Sunshine et al.,            | 2006 | Clinical<br>therapeutics.<br>2006; 28(8):1107-<br>1115                                                            | non pertinent |
| 6607 | Stonell et al.,             | 2006 | Anaesthesia. 2006;<br>61(3):240-247                                                                               | non pertinent |
| 6608 | Stewart et al.,             | 2006 | Diabetic<br>medicine. 2006;<br>23(10):1069-1078                                                                   | non pertinent |
| 6609 | Steele et al.,              | 2006 | J canadien de<br>pharmacologie<br>clinique (Canadian<br>j of clinical<br>pharmacology).<br>2006; 13(1):e50-<br>62 | non pertinent |
| 6610 | Stark et al.,               | 2006 | Neuroimage.<br>2006; 32(3):1290-<br>1298                                                                          | non pertinent |
| 6611 | Stan et al.,                | 2006 | J of clinical<br>endocrinology and<br>metabolism. 2006;<br>91(12):4817-4824                                       | non pertinent |
| 6612 | Sripada et al.,             | 2006 | BJOG. 2006;<br>113(7):835-838                                                                                     | non pertinent |
| 6613 | Springhart et al.,          | 2006 | J Endourol. 2006;<br>20(10):713-716                                                                               | non pertinent |
| 6614 | Sprenger et al.,            | 2006 | Anesth Analg.<br>2006; 103(3):729-<br>737                                                                         | non pertinent |
| 6615 | Sprenger et al.,            | 2006 | Pain. 2006; 122(1-<br>2):63-67                                                                                    | non pertinent |
| 6616 | Spoelstra-de Man<br>et al., | 2006 | J of human<br>hypertension.<br>2006; 20(8):599-<br>611                                                            | non pertinent |
| 6617 | Spencer et al.,             | 2006 | Clinical<br>therapeutics.<br>2006; 28(3):402-<br>418                                                              | non pertinent |

|      |                     |      |                                                                     |               |
|------|---------------------|------|---------------------------------------------------------------------|---------------|
| 6618 | Soetens et al.,     | 2006 | Anesthesia and Analgesia. 2006; 103(1):182-186                      | non pertinent |
| 6619 | Sobo et al.,        | 2006 | J Holist Nurs. 2006; 24(1):51-57                                    | non pertinent |
| 6620 | Soares et al.,      | 2006 | Obstetrics and gynecology. 2006; 108(6):1402-1410                   | non pertinent |
| 6621 | Smits et al.,       | 2006 | Consult Clin Psychol. 2006; 74(6):1203-1212                         | non pertinent |
| 6622 | Smits et al.,       | 2006 | Behaviour research and therapy. 2006; 44(12):1773-1785              | non pertinent |
| 6623 | Smita et al.,       | 2006 | AIDS research and therapy. 2006; 3(1)                               | non pertinent |
| 6624 | Smeets et al.,      | 2006 | BMC Musculoskelet Disord. 2006; 7:5                                 | non pertinent |
| 6625 | Smeets et al.,      | 2006 | J of Pain. 2006; 7(4):261-271                                       | non pertinent |
| 6626 | Small et al.,       | 2006 | Pain. 2006; 120(1-2):124-130                                        | non pertinent |
| 6627 | Skiveren et al.,    | 2006 | Acta dermatovenereologica. 2006; 86(5):409-411                      | non pertinent |
| 6628 | Siquier et al.,     | 2006 | J of antimicrobial chemotherapy. 2006; 57(3):536-545                | non pertinent |
| 6629 | Sinatra et al.,     | 2006 | Reg Anesth Pain Med. 2006; 31(2):134-142                            | non pertinent |
| 6630 | Silva et al.,       | 2006 | J of child and adolescent psychopharmacology. 2006; 16(3):239-251   | non pertinent |
| 6631 | Silva et al.,       | 2006 | J of hepatology. 2006; 45(2):204-213                                | non pertinent |
| 6632 | Silberstein et al., | 2006 | Clinical therapeutics. 2006; 28(7):1002-1011                        | non pertinent |
| 6633 | Shirakami et al.,   | 2006 | J of anesthesia. 2006; 20(2):78-85                                  | non pertinent |
| 6634 | Shinefield et al.,  | 2006 | Pediatric infectious disease j. 2006; 25(4):287-292                 | non pertinent |
| 6635 | Shelton et al.,     | 2006 | J of clinical psychiatry. 2006; 67(11):1674-1681                    | non pertinent |
| 6636 | Sheedy et al.,      | 2006 | J of clinical and experimental neuropsychology. 2006; 28(5):755-772 | non pertinent |
| 6637 | Shao et al.,        | 2006 | American j of surgery. 2006; 191(2):245-249                         | non pertinent |

|      |                        |      |                                                                  |               |
|------|------------------------|------|------------------------------------------------------------------|---------------|
| 6638 | Shafiq et al.,         | 2006 | Pharmacology. 2006; 78(3):136-143                                | non pertinent |
| 6639 | Semiglazov et al.,     | 2006 | Anticancer research. 2006; 26(2B):1519-1529                      | non pertinent |
| 6640 | Sciamanna et al.,      | 2006 | Headache. 2006; 46(1):92-100                                     | non pertinent |
| 6641 | Schwartz et al.,       | 2006 | Contraception. 2006; 74(2):133-140                               | non pertinent |
| 6642 | Schuurmans et al.,     | 2006 | American j of geriatric psychiatry. 2006; 14(3):255-263          | non pertinent |
| 6643 | Schutter et al.,       | 2006 | J of psychiatry & neuroscience. 2006; 31(2):101-104              | non pertinent |
| 6644 | Schreiber et al.,      | 2006 | Clinical gastroenterology and hepatology. 2006; 4(3):325-334     | non pertinent |
| 6645 | Schmitt et al.,        | 2006 | Nephrology, dialysis, transplantation. 2006; 21(12):3520-3524    | non pertinent |
| 6646 | Schmidt-Wilcke et al., | 2006 | Pain. 2006; 125(1-2):89-97                                       | non pertinent |
| 6647 | Schlaff et al.,        | 2006 | Fertility and sterility. 2006; 85(2):314-325                     | non pertinent |
| 6648 | Schifitto et al.,      | 2006 | J of neurovirology. 2006; 12(4):328-331                          | non pertinent |
| 6649 | Schiano et al.,        | 2006 | Liver transplantation. 2006; 12(9):1381-1389                     | non pertinent |
| 6650 | Schell                 | 2006 | J of surgical research. 2006; 134(1):124-132                     | non pertinent |
| 6651 | Scaccianoce et al.,    | 2006 | Canadian j of gastroenterology. 2006; 20(2):113-117              | non pertinent |
| 6652 | Santo et al.,          | 2006 | Diabetes research and clinical practice. 2006; 72(3):231-237     | non pertinent |
| 6653 | Sangal et al.,         | 2006 | Sleep. 2006; 29(12):1573-1585                                    | non pertinent |
| 6654 | Sami et al.,           | 2006 | Neuroscience. 2006; 140(1):269-279                               | non pertinent |
| 6655 | Salk et al.,           | 2006 | J of bone and joint surgery American volume. 2006; 88(2):295-302 | non pertinent |
| 6656 | Salinas et al.,        | 2006 | Anesthesia and Analgesia. 2006; 102(4):1234-1239                 | non pertinent |

|      |                     |      |                                                                                          |               |
|------|---------------------|------|------------------------------------------------------------------------------------------|---------------|
| 6657 | Salim et al.,       | 2006 | British j of dermatology. 2006; 154(6):1169-1174                                         | non pertinent |
| 6658 | Sakamoto et al.,    | 2006 | J of gastroenterology. 2006; 41(1):70-76                                                 | non pertinent |
| 6659 | Sahney              | 2006 | Pediatric drugs. 2006; 8(6):357-373                                                      | non pertinent |
| 6660 | Sahin et al.,       | 2006 | Clinical rheumatology. 2006; 25(2):143-148                                               | non pertinent |
| 6661 | Ryan et al.,        | 2006 | J of urology. 2006; 176(3):972-978                                                       | non pertinent |
| 6662 | Rowland et al.,     | 2006 | J of clinical psychology in medical settings. 2006; 13(3):263-271                        | non pertinent |
| 6663 | Rowan et al.,       | 2006 | Clinical therapeutics. 2006; 28(6):921-932                                               | non pertinent |
| 6664 | Rothstein et al.,   | 2006 | Gastroenterology. 2006; 131(3):704-712                                                   | non pertinent |
| 6665 | Rothner et al.,     | 2006 | Headache. 2006; 46(1):101-109                                                            | non pertinent |
| 6666 | Roth et al.,        | 2006 | Sleep medicine. 2006; 7(4):312-318                                                       | non pertinent |
| 6667 | Ross et al.,        | 2006 | Sexually transmitted infectious. 2006; 82(6):446-451                                     | non pertinent |
| 6668 | Ronkainen et al.,   | 2006 | J of pediatrics. 2006; 149(2):241-247                                                    | non pertinent |
| 6669 | Romsauerova et al., | 2006 | Physiol Meas. 2006; 27(5):211-219                                                        | non pertinent |
| 6670 | Rojnuckarin et al., | 2006 | Transactions of the Royal Society of Tropical Medicine and Hygiene. 2006; 100(9):879-884 | non pertinent |
| 6671 | Rogers et al.,      | 2006 | Academic emergency medicine. 2006; 13(6):617-622                                         | non pertinent |
| 6672 | Roes et al.,        | 2006 | European j of obstetrics, gynecology, and reproductive biology. 2006; 127(1):61-67       | non pertinent |
| 6673 | Roback et al.,      | 2006 | Annals of emergency medicine. 2006; 48(5):605-612                                        | non pertinent |

|      |                     |      |                                                                                                                   |               |
|------|---------------------|------|-------------------------------------------------------------------------------------------------------------------|---------------|
| 6674 | Righart et al.,     | 2006 | Cereb Cortex.<br>2006; 16(9):1249-1257                                                                            | non pertinent |
| 6675 | Riest et al.,       | 2006 | European j of anaesthesiology.<br>2006; 23(3):219-226                                                             | non pertinent |
| 6676 | Reyes et al.,       | 2006 | American j of psychiatry. 2006; 163(3):402-410                                                                    | non pertinent |
| 6677 | Reuben et al.,      | 2006 | Regional anesthesia and pain medicine.<br>2006; 31(1):6-13                                                        | non pertinent |
| 6678 | Reni et al.,        | 2006 | Pancreatology.<br>2006; 6(5):454-463                                                                              | non pertinent |
| 6679 | Renda et al.,       | 2006 | Clinical pharmacology and therapeutics.<br>2006; 80(3):264-274                                                    | non pertinent |
| 6680 | Reesink et al.,     | 2006 | Gastroenterology.<br>2006; 131(4):997-1002                                                                        | non pertinent |
| 6681 | Reed et al.,        | 2006 | European j of cancer (Oxford, England : 1990).<br>2006; 42(2):179-185                                             | non pertinent |
| 6682 | Reddy et al.,       | 2006 | Obstetrics and gynecology. 2006; 108(1):41-48                                                                     | non pertinent |
| 6683 | Reading et al.,     | 2006 | Clinical microbiology and infection. 2006; 12(11):1082-1088                                                       | non pertinent |
| 6684 | Raskin et al.,      | 2006 | Pain Medicine (Malden, Mass.).<br>2006; 7(5):373-385                                                              | non pertinent |
| 6685 | Raffaelli et al.,   | 2006 | European j of anaesthesiology.<br>2006; 23(7):605-610                                                             | non pertinent |
| 6686 | Qvistgaard et al.,  | 2006 | Osteoarthritis and cartilage. 2006; 14(2):163-170                                                                 | non pertinent |
| 6687 | Pud et al.,         | 2006 | Pain. 2006; 120(1-2):155-160                                                                                      | non pertinent |
| 6688 | Primavera et al.,   | 2006 | Cutaneous and ocular toxicology.<br>2006; 25(3):165-171                                                           | non pertinent |
| 6689 | Preutthipan et al., | 2006 | Fertility and sterility. 2006; 86(4):990-994                                                                      | non pertinent |
| 6690 | Pratley et al.,     | 2006 | Hormon- und Stoffwechselforschung / Hormones et metabolisme (Hormone and metabolic research). 2006; 38(6):423-428 | non pertinent |

|      |                   |      |                                                                    |               |
|------|-------------------|------|--------------------------------------------------------------------|---------------|
| 6691 | Prasad et al.,    | 2006 | Heart (British Cardiac Surgery). 2006; 92(6):798-803               | non pertinent |
| 6692 | Powles et al.,    | 2006 | Breast cancer research. 2006; 8(2):R13                             | non pertinent |
| 6693 | Poston et al.,    | 2006 | J of internal medicine. 2006; 260(4):388-398                       | non pertinent |
| 6694 | Ploner et al.,    | 2006 | Cereb Cortey. 2006; 16(4):537-540                                  | non pertinent |
| 6695 | Pilatti et al.,   | 2006 | J of periodontology. 2006; 77(11):1809-1814                        | non pertinent |
| 6696 | Pignata et al.,   | 2006 | BMC Cancer. 2006; 6:202                                            | non pertinent |
| 6697 | Philip et al.,    | 2006 | BJU international. 2006; 97(2):263-265                             | non pertinent |
| 6698 | Pessoa et al.,    | 2006 | Cereb Cortex. 2006; 16(3):366-375                                  | non pertinent |
| 6699 | Pendleton et al., | 2006 | J of urology. 2006; 176(4 Pt 1):1372-1375                          | non pertinent |
| 6700 | Peeters et al.,   | 2006 | Anesthesiology. 2006; 105(6):1135-1146                             | non pertinent |
| 6701 | Patkar et al.,    | 2006 | J of clinical psychopharmacology. 2006; 26(6):653-656              | non pertinent |
| 6702 | Patil et al.,     | 2006 | J of hand surgery (edinburgh, scotland). 2006; 31(6):683-686       | non pertinent |
| 6703 | Patel et al.,     | 2006 | International j of clincial practice. 2006; 60(8):914-921          | non pertinent |
| 6704 | Patel et al.,     | 2006 | J of the American Academy of Dermatology. 2006; 54(6):1025-1032    | non pertinent |
| 6705 | Paspatis et al.,  | 2006 | J of pediatric gastroenterology and nutrition. 2006; 43(2):195-199 | non pertinent |
| 6706 | Parlak et al.,    | 2006 | Academic emergency medicine. 2006; 13(5):493-499                   | non pertinent |
| 6707 | Pareek et al.,    | 2006 | Current medical research and opinion. 2006; 22(5):977-988          | non pertinent |
| 6708 | Paick et al.,     | 2006 | Prostata cancer and prostatic diseases. 2006; 9(3):261-265         | non pertinent |

|      |                                                              |      |                                                                                |               |
|------|--------------------------------------------------------------|------|--------------------------------------------------------------------------------|---------------|
| 6709 | Ozkose et al.,                                               | 2006 | Tohoku j of<br>experimental<br>medicine. 2006;<br>210(2):153-160               | non pertinent |
| 6710 | Osmanagaoglu et<br>al.,                                      | 2006 | Climacteric. 2006;<br>9(6):464-472                                             | non pertinent |
| 6711 | Oliver et al.,                                               | 2006 | Hypertension<br>(dallas, tex. :<br>1979). 2006;<br>48(4):622-627               | non pertinent |
| 6712 | Ochsner et al.,                                              | 2006 | Pain. 2006; 120(1-<br>2):69-77                                                 | non pertinent |
| 6713 | O'Shaughnessy et<br>al.,                                     | 2006 | Clinical breast<br>cancer. 2006;<br>6(6):505-510                               | non pertinent |
| 6714 | Nuñez et al.,                                                | 2006 | Osteoarthritis and<br>cartilage. 2006;<br>14(3):279-285                        | non pertinent |
| 6715 | Ntr - Hogenhuis                                              | 2006 | Netherlands Trial<br>Register. 2006                                            | non pertinent |
| 6716 | Nitti et al.,                                                | 2006 | BJU international.<br>2006; 97(6):1262-<br>1266                                | non pertinent |
| 6717 | Nikkola et al.,                                              | 2006 | Acta obstetrica<br>ET gynecologica<br>scandinavica.<br>2006; 85(2):188-<br>194 | non pertinent |
| 6718 | Newcorn et al.,                                              | 2006 | Pediatrics. 2006;<br>118(6):e1701-<br>1706                                     | non pertinent |
| 6719 | Neumanitis et al.,                                           | 2006 | J of clinical<br>oncology. 2006;<br>24(29):4721-4730                           | non pertinent |
| 6720 | Nct - Rosin                                                  | 2006 | National Library of<br>Medicine. 2006                                          | non pertinent |
| 6721 | Nct – National<br>Institutes of<br>Health Clinical<br>Center | 2006 | National Library of<br>Medicine. 2006                                          | non pertinent |
| 6722 | Nct – Gan                                                    | 2006 | National Library of<br>Medicine. 2006                                          | non pertinent |
| 6723 | Nct – Heilig                                                 | 2006 | National Library of<br>Medicine. 2006                                          | non pertinent |
| 6724 | Nct – Pomeroy                                                | 2006 | National Library of<br>Medicine. 2006                                          | non pertinent |
| 6725 | Nct – Borckardt                                              | 2006 | National Library of<br>Medicine. 2006                                          | non pertinent |
| 6726 | Nct – Paulus                                                 | 2006 | National Library of<br>Medicine. 2006                                          | non pertinent |
| 6727 | Nct – Garg                                                   | 2006 | National Library of<br>Medicine. 2006                                          | non pertinent |
| 6728 | Nct - Edinger                                                | 2006 | National Library of<br>Medicine. 2006                                          | non pertinent |
| 6729 | Nct – Mirski                                                 | 2006 | National Library of<br>Medicine. 2006                                          | non pertinent |
| 6730 | Nakatsuka et al.,                                            | 2006 | Canadian j of<br>anesthesia. 2006;<br>53(11):1103-1110                         | non pertinent |
| 6731 | Nakahara et al.,                                             | 2006 | International j of<br>eating disorders.<br>2006; 39(1):20-26                   | non pertinent |



|      |                     |      |                                                                      |               |
|------|---------------------|------|----------------------------------------------------------------------|---------------|
| 6732 | Naja et al,         | 2006 | Regional anesthesia and pain medicine. 2006; 31(3):196-201           | non pertinent |
| 6733 | Muzii et al.,       | 2006 | Fertility and sterility. 2006; 85(3):689-693                         | non pertinent |
| 6734 | Munizza et al,      | 2006 | Current medical research and opinion. 2006; 22(9):1703-1713          | non pertinent |
| 6735 | Mulgaonkar et al,   | 2006 | American j of transplantation. 2006; 6(8):1848-1857                  | non pertinent |
| 6736 | Mukherjee           | 2006 | Thrombosis and haematosi. 2006; 96(4):407-412                        | non pertinent |
| 6737 | Muellejans et al,   | 2006 | Critical care (london, england). 2006; 10(3):R91                     | non pertinent |
| 6738 | Muehlbacher et al., | 2006 | Clinical J of Pain. 2006; 22(6):526-531                              | non pertinent |
| 6739 | Movafegh et al,     | 2006 | Anesthesia and Analgesia. 2006; 102(1):263-267                       | non pertinent |
| 6740 | Moulton et al,      | 2006 | Am J Physiol Regul Integr Comp Physiol. 2006; 291(2):R257-267        | non pertinent |
| 6741 | Moulin et al,       | 2006 | Diabetes care. 2006; 29(3):515-520                                   | non pertinent |
| 6742 | Moskowitz et al,    | 2006 | Osteoarthritis and cartilage. 2006; 14(11):1111-1118                 | non pertinent |
| 6743 | Morley et al,       | 2006 | Addiction (Abingdon, England). 2006; 101(10):1451-1462               | non pertinent |
| 6744 | Morgan et al,       | 2006 | J of bone and joint surgery. American volume. 2006; 88(12):2606-2612 | non pertinent |
| 6745 | Moratti et al,      | 2006 | Psychophysiology. 2006; 43(2):216-226                                | non pertinent |
| 6746 | Morales et al,      | 2006 | J of the American Geriatrics Society. 2006; 54(1):70-76              | non pertinent |
| 6747 | Montaner et al,     | 2006 | Medgenmed: medscape general medicine. 2006; 8(2):36                  | non pertinent |
| 6748 | Mistraletti et al,  | 2006 | Regional anesthesia and pain medicine. 2006; 31(3):260-269           | non pertinent |

|      |                      |      |                                                                               |               |
|------|----------------------|------|-------------------------------------------------------------------------------|---------------|
| 6749 | Misbahuddin et al.,  | 2006 | Clinical toxicology (Philadelphia, Pa.). 2006; 44(2):135-141                  | non pertinent |
| 6750 | Miner et al.,        | 2006 | Clinical therapeutics. 2006; 28(5):725-733                                    | non pertinent |
| 6751 | Miller et al.,       | 2006 | Pain Physician. 2006; 9(2):115-121                                            | non pertinent |
| 6752 | Mikkelsen et al.,    | 2006 | Acta anaesthesiologica Scandinavica. 2006; 50(7):809-815                      | non pertinent |
| 6753 | Michalská et al.,    | 2006 | J of clinical endocrinology and metabolism. 2006; 91(3):870-877               | non pertinent |
| 6754 | Michael Hill et al., | 2006 | Clinical therapeutics. 2006; 28(9):1279-1295                                  | non pertinent |
| 6755 | Meisel et al.,       | 2006 | European spine j. 2006; 15 Suppl 3:397-405                                    | non pertinent |
| 6756 | McQuellon et al.,    | 2006 | Gynecologic oncology. 2006; 101(2):296-304                                    | non pertinent |
| 6757 | McLaughlin et al.,   | 2006 | American j of respiratory and critical care medicine. 2006; 174(11):1257-1263 | non pertinent |
| 6758 | McCutcheon et al.,   | 2006 | Anesthesia and Analgesia. 2006; 102(3):668-675                                | non pertinent |
| 6759 | McCall et al.,       | 2006 | Current medical research and opinion. 2006; 22(9):1633-1642                   | non pertinent |
| 6760 | Mazzola et al.,      | 2006 | Cereb Cortex. 2006; 16(7):960-968                                             | non pertinent |
| 6761 | Mayhew et al.,       | 2006 | Clin Neurophysiol. 2006; 117(6):1331-1344                                     | non pertinent |
| 6762 | Mayer et al.,        | 2006 | Anesthesia and Analgesia. 2006; 102(2):400-404                                | non pertinent |
| 6763 | May et al.,          | 2006 | J Neurosci. 2006; 26(13):3589-3593                                            | non pertinent |
| 6764 | Matsuhisa et al.,    | 2006 | Helicobacter. 2006; 11(3):152-158                                             | non pertinent |
| 6765 | Mathieu et al.,      | 2006 | J canadien d'anesthésie (Canadian j of anaesthesia). 2006; 53(1):60-66        | non pertinent |

|      |                        |      |                                                                  |               |
|------|------------------------|------|------------------------------------------------------------------|---------------|
| 6766 | Masuda et al.,         | 2006 | Clin Biomech<br>(Bristol, Avon).<br>2006; 21(3):245-<br>253      | non pertinent |
| 6767 | Massad et al.,         | 2006 | Saudi medical j.<br>2006; 27(7):997-<br>1000                     | non pertinent |
| 6768 | Maruyama et al.,       | 2006 | International j of<br>urology. 2006;<br>13(10):1280-1285         | non pertinent |
| 6769 | Marcus et al.,         | 2006 | Medical science<br>monitor. 2006;<br>12(1):P11-7                 | non pertinent |
| 6770 | Manninen et al.,       | 2006 | Anesthesia and<br>Analgesia. 2006;<br>102(1):237-242             | non pertinent |
| 6771 | Manicourt et al.,      | 2006 | Arthritis and<br>rheumatism.<br>2006; 54(10):3205-               | non pertinent |
| 6772 | Manchikanti et<br>al., | 2006 | Pain Physician.<br>2006; 9(1):47-51                              | non pertinent |
| 6773 | Manchikanti et<br>al., | 2006 | Pain Physician.<br>2006; 9(1):57-60                              | non pertinent |
| 6774 | Malviya et al.,        | 2006 | Paediatric<br>anaesthesia. 2006;<br>16(5):554-559                | non pertinent |
| 6775 | Maltepe et al.,        | 2006 | Anaesthesia and<br>intensive care.<br>2006; 34(3):353-<br>357    | non pertinent |
| 6776 | MacDermid et al.,      | 2006 | BMC<br>musculoskeletal<br>disorders. 2006;<br>7:25               | non pertinent |
| 6777 | Lustig et al.,         | 2006 | International j of<br>obesity (2005).<br>2006; 30(2):331-<br>341 | non pertinent |
| 6778 | Lundeberg et al.,      | 2006 | Paediatric<br>anaesthesia. 2006;<br>16(2):164-169                | non pertinent |
| 6779 | Luhmann et al.,        | 2006 | Pediatrics. 2006;<br>118(4):e1078-<br>1086                       | non pertinent |
| 6780 | Luginbühl et al.,      | 2006 | British j of<br>anaesthesia. 2006;<br>96(3):323-329              | non pertinent |
| 6781 | Lucas et al.,          | 2006 | Brain Behav<br>Immun. 2006;<br>20(1):49-56                       | non pertinent |
| 6782 | Lu et al.,             | 2006 | Clinical J of Pain.<br>2006; 22(9):799-<br>804                   | non pertinent |
| 6783 | Lloyd et al.,          | 2006 | J of<br>neurophysiology.<br>2006; 95(1):205-<br>214              | non pertinent |
| 6784 | Lin et al.,            | 2006 | Lancet (london,<br>england). 2006;<br>368(9540):991-<br>997      | non pertinent |
| 6785 | Lima et al.,           | 2006 | J Spinal Cord Med.<br>2006; 29(3):191-<br>203                    | non pertinent |

|      |                         |      |                                                                   |               |
|------|-------------------------|------|-------------------------------------------------------------------|---------------|
| 6786 | Lilleby et al.,         | 2006 | Bone marrow transplantation. 2006; 37(11):1031-1035               | non pertinent |
| 6787 | Liedman et al.,         | 2006 | Acta obstetrica ET gynecologica scandinavica. 2006; 85(2):207-211 | non pertinent |
| 6788 | Li et al.,              | 2006 | Clinical therapeutics. 2006; 28(3):419-427                        | non pertinent |
| 6789 | Li et al.,              | 2006 | Human reproduction (Oxford, England). 2006; 21(6):1461-1466       | non pertinent |
| 6790 | Leung et al.,           | 2006 | BJOG. 2006; 113(12):1459-1464                                     | non pertinent |
| 6791 | Lemmens et al.,         | 2006 | Anesthesia and Analgesia. 2006; 102(2):438-442                    | non pertinent |
| 6792 | Lémann et al.,          | 2006 | Gastroenterology. 2006; 130(4):1054-1061                          | non pertinent |
| 6793 | Laurent et al.,         | 2006 | Pacing and clinical electrophysiology : PACE. 2006; 29(4):351-357 | non pertinent |
| 6794 | Lasalvia-Prisco et al., | 2006 | Medical oncology (Northwood, London, England). 2006; 23(1):91-104 | non pertinent |
| 6795 | Larsen et al.,          | 2006 | American j of clinical nutrition. 2006; 83(3):606-612             | non pertinent |
| 6796 | Lam et al.,             | 2006 | American j of psychiatry. 2006; 163(5):805-812                    | non pertinent |
| 6797 | Krolewiecki et al.,     | 2006 | J of acquired immune deficiency syndromes. 2006; 41(4):425-429    | non pertinent |
| 6798 | Kroenke et al.,         | 2006 | J of clinical psychiatry. 2006; 67(1):72-80                       | non pertinent |
| 6799 | Kranzler et al.,        | 2006 | J of clinical psychopharmacology. 2006; 26(1):13-20               | non pertinent |
| 6800 | Konstas et al.,         | 2006 | Ophthalmology. 2006; 113(3):446-450                               | non pertinent |
| 6801 | Kobashigawa et al.,     | 2006 | J of heart and lung transplantation. 2006; 25(8):935-941          | non pertinent |

|      |                   |      |                                                              |               |
|------|-------------------|------|--------------------------------------------------------------|---------------|
| 6802 | Kleinböhl et al., | 2006 | Anesthesia and Analgesia. 2006; 102(3):840-847               | non pertinent |
| 6803 | Kirchner et al.,  | 2006 | Osteoarthritis and cartilage. 2006; 14(2):154-162            | non pertinent |
| 6804 | Kimura et al.,    | 2006 | Current rheumatology reports. 2006; 8(6):480-488             | non pertinent |
| 6805 | Kim et al.,       | 2006 | Anesth Analg. 2006; 102(1):156-159                           | non pertinent |
| 6806 | Kim et al.,       | 2006 | British j of anaesthesia. 2006; 97(3):414-418                | non pertinent |
| 6807 | Khalil et al.,    | 2006 | British j of anaesthesia. 2006; 96(2):171-178                | non pertinent |
| 6808 | Karimi et al.,    | 2006 | American j of hematology. 2006; 81(11):809-816               | non pertinent |
| 6809 | Karges et al.,    | 2006 | Clinical therapeutics. 2006; 28(12):2094-2101                | non pertinent |
| 6810 | Karaaslan et al., | 2006 | J of clinical anesthesia. 2006; 18(8):589-593                | non pertinent |
| 6811 | Kanazi et al.,    | 2006 | Acta anaesthesiologica Scandinavica. 2006; 50(2):222-227     | non pertinent |
| 6812 | Kanai et al.,     | 2006 | Headache. 2006; 46(4):577-582                                | non pertinent |
| 6813 | Kan et al.,       | 2006 | Human reproduction (Oxford, England). 2006; 21(10):2606-2611 | non pertinent |
| 6814 | Kallio et al.,    | 2006 | British j of anaesthesia. 2006; 97(5):704-709                | non pertinent |
| 6815 | Jones et al.,     | 2006 | J of cancer education. 2006; 21(4):237-242                   | non pertinent |
| 6816 | Johnson et al.,   | 2006 | J of human hypertension. 2006; 20(7):496-503                 | non pertinent |
| 6817 | Ji et al.,        | 2006 | J of gastroenterology and hepatology. 2006; 21(9):1381-1387  | non pertinent |
| 6818 | Jensen et al.,    | 2006 | American j of gastroenterology. 2006; 101(9):1991-1999       | non pertinent |
| 6819 | Jenis et al.,     | 2006 | Spine j. 2006; 6(1):14-20                                    | non pertinent |

|      |                  |      |                                                              |               |
|------|------------------|------|--------------------------------------------------------------|---------------|
| 6820 | Jadhav et al.,   | 2006 | J of the American College of Cardiology. 2006; 48(5):956-963 | non pertinent |
| 6821 | Jackson et al.,  | 2006 | J Clin Psychopharmacol. 2006; 26(1):4-8                      | non pertinent |
| 6822 | Iwama et al.,    | 2006 | International j of clinical oncology. 2006; 11(2):133-139    | non pertinent |
| 6823 | Ishiyama et al., | 2006 | J of clinical anesthesia. 2006; 18(3):211-215                | non pertinent |
| 6824 | Inui et al.,     | 2006 | J Neurophysiol. 2006; 96(2):775-784                          | non pertinent |
| 6825 | Imai et al.,     | 2006 | Clinical and experimental nephrology. 2006; 10(1):40-54      | non pertinent |
| 6826 | Hunt et al.,     | 2006 | J Behav Ther Exp Psychiatry. 2006; 37(4):283-298             | non pertinent |
| 6827 | Huh et al.,      | 2006 | Korean j of anesthesiology. 2006; 51(1):70-75                | non pertinent |
| 6828 | Huber et al.,    | 2006 | J of clinical oncology. 2006; 24(27):4397-4404               | non pertinent |
| 6829 | Hu et al.,       | 2006 | Chinese j of clinical rehabilitation. 2006; 10(4):62-64      | non pertinent |
| 6830 | Hsiao et al.,    | 2006 | Acta anaesthesiologica Taiwanica. 2006; 44(2):93-99          | non pertinent |
| 6831 | Houghton et al., | 2006 | Clinical therapeutics. 2006; 28(4):569-581                   | non pertinent |
| 6832 | Hörfelt et al.,  | 2006 | British j of dermatology. 2006; 155(3):608-613               | non pertinent |
| 6833 | Hoogma et al.,   | 2006 | Diabetic medicine. 2006; 23(2):141-147                       | non pertinent |
| 6834 | Hofmann et al.,  | 2006 | Arch Gen Psychiatry. 2006; 63(3):298-304                     | non pertinent |
| 6835 | Hocker et al.,   | 2006 | Anaesthesia. 2006; 61(8):752-757                             | non pertinent |
| 6836 | Hirsh et al.,    | 2006 | Digestive diseases and sciences. 2006; 51(11):1946-1951      | non pertinent |
| 6837 | Hiller et al.,   | 2006 | Anesthesia and Analgesia. 2006; 102(5):1365-1371             | non pertinent |
| 6838 | Hill et al.,     | 2006 | Anesthesiology. 2006; 104(5):1047-1053                       | non pertinent |

|      |                       |      |                                                                                   |               |
|------|-----------------------|------|-----------------------------------------------------------------------------------|---------------|
| 6839 | Herrlinger et al.,    | 2006 | American j of gastroenterology. 2006; 101(4):793-797                              | non pertinent |
| 6840 | Herranz et al.,       | 2006 | European j of clinical pharmacology. 2006; 62(10):805-815                         | non pertinent |
| 6841 | Henderson et al.,     | 2006 | American j of gastroenterology. 2006; 101(1):119-123                              | non pertinent |
| 6842 | Henderson et al.,     | 2006 | Pain. 2006; 120(3):286-296                                                        | non pertinent |
| 6843 | Heiman et al.,        | 2006 | J of psychosomatic obstetrics and gynaecology. 2006; 27(1):31-41                  | non pertinent |
| 6844 | Heiligenstein et al., | 2006 | J of child and adolescent psychopharmacology. 2006; 16(1-2):207-217               | non pertinent |
| 6845 | Hauck et al.,         | 2006 | European j of pain (London, England). 2006; 10(8):757-765                         | non pertinent |
| 6846 | Hashkes et al.,       | 2006 | Current rheumatology reports. 2006; 8(6):450-458                                  | non pertinent |
| 6847 | Harmer et al.,        | 2006 | Biol Psychiatry. 2006; 59(9):816-820                                              | non pertinent |
| 6848 | Han et al.,           | 2006 | J of alternative and complementary medicine (New York, N.Y.). 2006; 12(6):535-541 | non pertinent |
| 6849 | Hall et al.,          | 2006 | Anesth Prog. 2006; 53(2):34-42                                                    | non pertinent |
| 6850 | Habrat et al.,        | 2006 | Psychiatria polska. 2006; 40(3):579-597                                           | non pertinent |
| 6851 | Gutmann et al.,       | 2006 | Paediatr Anaesth. 2006; 16(3):266-274                                             | non pertinent |
| 6852 | Gürkan et al.,        | 2006 | J of periodontology. 2006; 77(3):370-384                                          | non pertinent |
| 6853 | Gupta                 | 2006 | ANZ j of surgery. 2006; 76(8):718-721                                             | non pertinent |
| 6854 | Gupta et al.,         | 2006 | Anesthesiology. 2006; 105(4):784-793                                              | non pertinent |
| 6855 | Guo et al.,           | 2006 | International j of urology. 2006; 13(6):721-727                                   | non pertinent |

|      |                      |      |                                                                                   |               |
|------|----------------------|------|-----------------------------------------------------------------------------------|---------------|
| 6856 | Guo et al.,          | 2006 | Neural regeneration research. 2006; 1(9):859-861                                  | non pertinent |
| 6857 | Gunduz et al.,       | 2006 | Paediatric anaesthesia. 2006; 16(2):158-163                                       | non pertinent |
| 6858 | Guggenberger et al., | 2006 | European j of anaesthesiology. 2006; 23(10):832-840                               | non pertinent |
| 6859 | Grundmann et al.,    | 2006 | Anesthesia and Analgesia. 2006; 103(1):217-222                                    | non pertinent |
| 6860 | Greenway et al.,     | 2006 | International j of obesity (2005). 2006; 30(12):1737-1741                         | non pertinent |
| 6861 | Greenhill et al.,    | 2006 | J of the American Academy of Child and Adolescent Psychiatry. 2006; 45(7):817-823 | non pertinent |
| 6862 | Greenhill et al.,    | 2006 | J of the American Academy of Child and Adolescent Psychiatry. 2006; 45(5):503-511 | non pertinent |
| 6863 | Greenblatt et al.,   | 2006 | J Clin Pharmacol. 2006; 46(12):1469-1480                                          | non pertinent |
| 6864 | Graziani et al.,     | 2006 | International J of Oral and Maxillofacial Surgery. 2006; 35(3):241-246            | non pertinent |
| 6865 | Gramke et al.,       | 2006 | Anesthesia and Analgesia. 2006; 102(3):755-758                                    | non pertinent |
| 6866 | Goldstein et al.,    | 2006 | Current medical research and opinion. 2006; 22(9):1715-1723                       | non pertinent |
| 6867 | Gold et al.,         | 2006 | Cyberpsychol Behav. 2006; 9(2):207-212                                            | non pertinent |
| 6868 | Gold et al.,         | 2006 | HIV medicine. 2006; 7(3):146-155                                                  | non pertinent |
| 6869 | Glueck et al.,       | 2006 | Clinical therapeutics. 2006; 28(6):933-942                                        | non pertinent |
| 6870 | Giri                 | 2006 | Acta clinica Belgica. 2006; 61(5):286-294                                         | non pertinent |
| 6871 | Gille et al.,        | 2006 | Der Anaesthesist. 2006; 55(4):414-422                                             | non pertinent |
| 6872 | Giannini et al.,     | 2006 | J of clinical gastroenterology. 2006; 40(6):515-520                               | non pertinent |



|      |                    |      |                                                                   |               |
|------|--------------------|------|-------------------------------------------------------------------|---------------|
| 6873 | Gau et al.,        | 2006 | J of child and adolescent psychopharmacology. 2006; 16(4):441-455 | non pertinent |
| 6874 | Gasbarrini et al., | 2006 | Digestive diseases (basel, switzerland). 2006; 24(1-2):195-200    | non pertinent |
| 6875 | Gallagher et al.,  | 2006 | Annals of emergency medicine. 2006; 48(2):150-160, 160.e151-154   | non pertinent |
| 6876 | Fuchs et al.,      | 2006 | Osteoarthritis and cartilage. 2006; 14(1):82-88                   | non pertinent |
| 6877 | Friedman et al.,   | 2006 | Headache. 2006; 46(6):934-941                                     | non pertinent |
| 6878 | Fregni et al.,     | 2006 | Arthritis and rheumatism. 2006; 54(12):3988-                      | non pertinent |
| 6879 | Fregni et al.,     | 2006 | Pain. 2006; 122(1-2):197-209                                      | non pertinent |
| 6880 | Franke et al.,     | 2006 | Gynecological endocrinology. 2006; 22(12):692-697                 | non pertinent |
| 6881 | Foss et al.,       | 2006 | J Neurophysiol. 2006; 95(2):730-736                               | non pertinent |
| 6882 | Fornai et al.,     | 2006 | Anesthesiology. 2006 104(1):152-157                               | non pertinent |
| 6883 | Flowers et al.,    | 2006 | Clinical therapeutics. 2006; 28(11):1803-1811                     | non pertinent |
| 6884 | Ferahbas et al.,   | 2006 | American j of therapeutics. 2006; 13(4):332-336                   | non pertinent |
| 6885 | Fellström et al.,  | 2006 | Clinical transplantation. 2006; 20(6):732-739                     | non pertinent |
| 6886 | Feldman et al.,    | 2006 | J of the American College of Cardiology. 2006; 48(6):1198-1205    | non pertinent |
| 6887 | Feld et al.,       | 2006 | J Clin Anesth. 2006; 18(1):24-28                                  | non pertinent |
| 6889 | Fassoulaki et al., | 2006 | European j of anaesthesiology. 2006; 23(2):136-141                | non pertinent |
| 6890 | Faessel et al.,    | 2006 | J Clin Pharmacol. 2006; 46(12):1439-1448                          | non pertinent |
| 6891 | Fabian et al.,     | 2006 | J of cardiovascular electrophysiology. 2006; 17(4):391-395        | non pertinent |

|      |                      |      |                                                                                      |               |
|------|----------------------|------|--------------------------------------------------------------------------------------|---------------|
| 6892 | Euctr, N.L.          | 2006 | EU Clinical Trials Register. 2006                                                    | non pertinent |
| 6893 | Ersayli et al.,      | 2006 | Spine. 2006; 31(19):2221-2226                                                        | non pertinent |
| 6894 | Emslie et al.,       | 2006 | J of the American Academy of Child and Adolescent Psychiatry. 2006; 45(12):1440-1455 | non pertinent |
| 6895 | Ekman et al.,        | 2006 | Arthroscopy. 2006; 22(6):635-642                                                     | non pertinent |
| 6896 | Ekman et al.,        | 2006 | American j of sports medicine. 2006; 34(6):945-955                                   | non pertinent |
| 6897 | Edelman et al.,      | 2006 | Obstetrics and gynecology. 2006; 107(2 Pt 1):269-275                                 | non pertinent |
| 6898 | Ebbens et al.,       | 2006 | J of allergy and clinical immunology. 2006; 118(5):1149-1156                         | non pertinent |
| 6899 | Dunn et al.,         | 2006 | Arthroscopy. 2006; 22(5):479-483                                                     | non pertinent |
| 6900 | Duc et al.,          | 2006 | Eur Radiol. 2006; 16(2):473-478                                                      | non pertinent |
| 6901 | Drewes et al.,       | 2006 | Gut. 2006; 55(5):619-629                                                             | non pertinent |
| 6902 | Drewes et al.,       | 2006 | Exp Brain Res. 2006; 174(3):443-452                                                  | non pertinent |
| 6903 | Drescher et al.,     | 2006 | Headache. 2006; 46(10):1487-1491                                                     | non pertinent |
| 6904 | Donnenfeld et al.,   | 2006 | J of cataract and refractive surgery. 2006; 32(9):1474-1482                          | non pertinent |
| 6905 | Di Liddo et al.,     | 2006 | Annals of emergency medicine. 2006; 48(4):433-440, 440.e431                          | non pertinent |
| 6906 | Demiraran et al.,    | 2006 | Paediatric anaesthesia. 2006; 16(10):1047-1050                                       | non pertinent |
| 6907 | De Francisco et al., | 2006 | International j of clinical practice. 2006; 60(12):1687-1696                         | non pertinent |
| 6908 | Das Neves et al.,    | 2006 | Revista brasileira de anesthesiologica. 2006; 56(4):370-376                          | non pertinent |
| 6909 | Darwish et al.,      | 2006 | Clinical therapeutics. 2006; 28(5):715-724                                           | non pertinent |
| 6910 | Dancey et al.,       | 2006 | Nutrition j. 2006; 5:16                                                              | non pertinent |

|      |                   |      |                                                                                                  |               |
|------|-------------------|------|--------------------------------------------------------------------------------------------------|---------------|
| 6911 | Dalton et al.,    | 2006 | Annals of emergency medicine. 2006; 48(5):615-623                                                | non pertinent |
| 6912 | Dahaba et al.,    | 2006 | Anesthesia and Analgesia. 2006; 103(2):378-384                                                   | non pertinent |
| 6913 | D'Antono et al.,  | 2006 | Can J Cardiol. 2006; 22(5):411-417                                                               | non pertinent |
| 6914 | D'Amico et al.,   | 2006 | Ophthalmology. 2006; 113(6):992-1001.e1006                                                       | non pertinent |
| 6915 | Cyriac et al.,    | 2006 | Expert review of medical devices. 2006; 3(6):777-786                                             | non pertinent |
| 6916 | Cutler et al.,    | 2006 | CNS spectrums. 2006; 11(9):691-702                                                               | non pertinent |
| 6917 | Croom et al.,     | 2006 | American j of cancer. 2006; 5(2):123-136                                                         | non pertinent |
| 6918 | Creinin et al.,   | 2006 | Obstetrics and gynecology. 2006; 108(5):1089-1097                                                | non pertinent |
| 6919 | Cramer et al.,    | 2006 | Acta Neurol Scand. 2006; 113(3):156-162                                                          | non pertinent |
| 6920 | Cosyn et al.,     | 2006 | J of periodontology. 2006; 77(3):406-415                                                         | non pertinent |
| 6921 | Corrocher et al., | 2006 | Clinical therapeutics. 2006; 28(9):1296-1302                                                     | non pertinent |
| 6922 | Cobo Sanz et al., | 2006 | Nutricion hospitalaria. 2006; 21(4):547-551                                                      | non pertinent |
| 6923 | Clegg et al.,     | 2006 | Pediatric infectiousdisease j. 2006; 25(9):761-767                                               | non pertinent |
| 6924 | Cittadini et al., | 2006 | Archives of neurology. 2006; 63(11):1537-1542                                                    | non pertinent |
| 6925 | Church et al.,    | 2006 | Laryngoscopy. 2006; 116(4):602-606                                                               | non pertinent |
| 6926 | Chu et al.,       | 2006 | Hong kong medical j = xianggang yi xue za zhi. 2006; 12(6):442-447                               | non pertinent |
| 6927 | Chong et al.,     | 2006 | Annals of oncology: official j of the european society for medical oncology. 2006; 17(3):437-442 | non pertinent |
| 6928 | Chiron et al.,    | 2006 | J of child neurology. 2006; 21(6):496-502                                                        | non pertinent |

|      |                     |      |                                                                                      |               |
|------|---------------------|------|--------------------------------------------------------------------------------------|---------------|
| 6929 | Chiarioni et al.,   | 2006 | Gastroenterology. 2006; 130(3):657-664                                               | non pertinent |
| 6930 | Chia et al.,        | 2006 | Anesthesia and Analgesia. 2006; 102(1):201-208                                       | non pertinent |
| 6931 | Chevrel et al.,     | 2006 | J of bone and mineral research. 2006; 21(2):300-306                                  | non pertinent |
| 6932 | Cheon et al.,       | 2006 | J of gastroenterology and hepatology. 2006; 21(10):1590-1595                         | non pertinent |
| 6933 | Chen et al.,        | 2006 | Neuroimage. 2006; 29(4):1080-1091                                                    | non pertinent |
| 6934 | Chazova et al.,     | 2006 | Diabetes, obesity & metabolism. 2006; 8(4):456-465                                   | non pertinent |
| 6935 | Chang et al.,       | 2006 | Cerebrovascular diseases (basel, switzerland). 2006; 22(4):258-262                   | non pertinent |
| 6936 | Chang et al.,       | 2006 | Acta anaesthesiologica Taiwanica. 2006; 44(3):153-159                                | non pertinent |
| 6937 | Chandra et al.,     | 2006 | International j of clinical pharmacology and therapeutics. 2006; 44(8):358-363       | non pertinent |
| 6938 | Chan et al.,        | 2006 | International j of obstetric anesthesia. 2006; 15(3):201-205                         | non pertinent |
| 6939 | Chambers et al.,    | 2006 | Oral oncology. 2006; 42(9):946-953                                                   | non pertinent |
| 6940 | Carteni et al.,     | 2006 | Oncologist. 2006; 11(7):841-848                                                      | non pertinent |
| 6941 | Cararach et al.,    | 2006 | European j of obstetrics, gynecology, and reproductive biology. 2006; 127(2):204-208 | non pertinent |
| 6942 | Cañete et al.,      | 2006 | Current medical research and opinion. 2006; 22(11):2131-2136                         | non pertinent |
| 6943 | Canbakan et al.,    | 2006 | J of gastroenterology and hepatology. 2006; 21(4):657-663                            | non pertinent |
| 6944 | Buvanendran et al., | 2006 | Anesthesiology. 2006; 104(3):403-410                                                 | non pertinent |

|      |                   |      |                                                                 |               |
|------|-------------------|------|-----------------------------------------------------------------|---------------|
| 6945 | Busch et al.,     | 2006 | Cephalalgia. 2006; 26(1):50-55                                  | non pertinent |
| 6946 | Bruce et al.,     | 2006 | Paediatric anaesthesia. 2006; 16(3):302-308                     | non pertinent |
| 6947 | Brass et al.,     | 2006 | J of vascular surgery. 2006; 43(4):752-759                      | non pertinent |
| 6948 | Brandt et al.,    | 2006 | Rheumatology (Oxford). 2006; 45(11):1389-1394                   | non pertinent |
| 6949 | Boyle et al.,     | 2006 | Neuroimage. 2006; 31(3):1278-1283                               | non pertinent |
| 6950 | Bousofara et al., | 2006 | Tunisie medicale. 2006; 84(7):427-431                           | non pertinent |
| 6951 | Borrelli et al.,  | 2006 | Clinical gastroenterology and hepatology. 2006; 4(6):744-753    | non pertinent |
| 6952 | Borghi et al.,    | 2006 | American heart j. 2006; 152(3):470-477                          | non pertinent |
| 6953 | Boone et al.,     | 2006 | Digestive diseases and sciences. 2006; 51(6):1103-1112          | non pertinent |
| 6954 | Bonifazi et al.,  | 2006 | Psychoneuroendocrinology. 2006; 31(9):1076-1086                 | non pertinent |
| 6955 | Bolondi et al.,   | 2006 | Clinical gastroenterology and hepatology. 2006; 4(11):1395-1402 | non pertinent |
| 6956 | Bogels            | 2006 | Behav Res Ther. 2006; 44(8):1199-1210                           | non pertinent |
| 6957 | Blockmans et al., | 2006 | American j of medicine. 2006; 119(2):167.e123-130               | non pertinent |
| 6958 | Blesa et al.,     | 2006 | Neurologia (barcelona, spain). 2006; 21(6):289-296              | non pertinent |
| 6959 | Blay et al.,      | 2006 | Regional anesthesia and pain medicine. 2006; 31(2):127-133      | non pertinent |
| 6960 | Black et al.,     | 2006 | Sleep. 2006; 29(7):939-946                                      | non pertinent |
| 6961 | Bjørnstad et al., | 2006 | Acta anaesthesiologica Scandinavica. 2006; 50(3):358-363        | non pertinent |
| 6962 | Bingham et al.,   | 2006 | Arthritis and rheumatism. 2006; 54(11):3494-                    | non pertinent |
| 6963 | Bingel et al.,    | 2006 | Pain. 2006; 120(1-2): 8-15                                      | non pertinent |

|      |                    |      |                                                                                                                              |               |
|------|--------------------|------|------------------------------------------------------------------------------------------------------------------------------|---------------|
| 6964 | Bilotta et al.,    | 2006 | Paediatr Anaesth. 2006; 16(12):1232-1237                                                                                     | non pertinent |
| 6965 | Bijur et al.,      | 2006 | J of Pain. 2006; 7(2):75-81                                                                                                  | non pertinent |
| 6966 | Biederman et al.,  | 2006 | Clinical therapeutics. 2006; 28(2):280-293                                                                                   | non pertinent |
| 6967 | Bhatnagar et al.,  | 2006 | Anaesthesia and intensive care. 2006; 34(5):586-591                                                                          | non pertinent |
| 6968 | Bettucci et al.,   | 2006 | J of headache and pain. 2006; 7(1):34-36                                                                                     | non pertinent |
| 6969 | Bergasa et al.,    | 2006 | Hepatology (baltimore, md.). 2006; 44(5):1317-1323                                                                           | non pertinent |
| 6970 | Benedetti et al.,  | 2006 | Pain. 2006; 121(1-2):133-144                                                                                                 | non pertinent |
| 6971 | Belani et al.,     | 2006 | Lung cancer (Amsterdam, Netherlands). 2006; 53(2):231-239                                                                    | non pertinent |
| 6972 | Bartocci et al.,   | 2006 | Pain. 2006; 122(1-2):109-117                                                                                                 | non pertinent |
| 6973 | Barroso et al.,    | 2006 | Brazilian j of medical and biological research = revista brasileira de pesquisas medicas e biologicas. 2006; 39(9):1241-1247 | non pertinent |
| 6974 | Barrio et al.,     | 2006 | J of immunotherapy. 2006; 29(4):444-454                                                                                      | non pertinent |
| 6975 | Barnes et al.,     | 2006 | Planta medica. 2006; 72(4):378-382                                                                                           | non pertinent |
| 6976 | Barkhuizen et al., | 2006 | J of rheumatology. 2006; 33(9):1805-1812                                                                                     | non pertinent |
| 6977 | Ballas et al.,     | 2006 | Health and quality of life outcomes. 2006; 4:59                                                                              | non pertinent |
| 6978 | Axelsson et al.,   | 2006 | J canadien d'anesthesie (Canadian j of anaesthesia). 2006; 53(4):370-374                                                     | non pertinent |
| 6979 | Armingeat et al.,  | 2006 | Osteoporosis international. 2006; 17(11):1659-1665                                                                           | non pertinent |

|      |                          |      |                                                                                          |               |
|------|--------------------------|------|------------------------------------------------------------------------------------------|---------------|
| 6980 | Arikan et al.,           | 2006 | J of<br>otolaryngology.<br>2006; 35(3):167-<br>172                                       | non pertinent |
| 6981 | Arber et al.,            | 2006 | Gut. 2006;<br>55(3):367-373                                                              | non pertinent |
| 6982 | Antila et al.,           | 2006 | Paediatric<br>anaesthesia. 2006;<br>16(5):548-553                                        | non pertinent |
| 6983 | Anand et al.,            | 2006 | American j of<br>therapeutics.<br>2006; 13(3):183-<br>187                                | non pertinent |
| 6984 | Alvarez-Soria et<br>al., | 2006 | Annals of the<br>rheumatic<br>diseases. 2006;<br>65(8):998-1005                          | non pertinent |
| 6985 | Alhashemi et al.,        | 2006 | J canadien<br>d'anesthesie<br>(Canadian j of<br>anaesthesia).<br>2006; 53(5):449-<br>455 | non pertinent |
| 6986 | Alhashemi et al.,        | 2006 | British j of<br>anaesthesia. 2006;<br>96(6):790-795                                      | non pertinent |
| 6987 | Alessandri et al.,       | 2006 | Acta obstetricia<br>ET gynecologica<br>scandinavica.<br>2006; 85(7):844-<br>849          | non pertinent |
| 6988 | Alberts et al.,          | 2006 | American j of<br>therapeutics.<br>2006; 13(4):291-<br>297                                | non pertinent |
| 6989 | Aiello et al.,           | 2006 | Investigative<br>ophthalmology &<br>visual science.<br>2006; 47(1):86-92                 | non pertinent |
| 6990 | Ahrendt et al.,          | 2006 | Contraception.<br>2006; 74(6):451-<br>457                                                | non pertinent |
| 6991 | Ahles et al.,            | 2006 | Annals of family<br>medicine. 2006;<br>4(4):341-350                                      | non pertinent |
| 6992 | Agren et al.,            | 2006 | Wound repair and<br>regeneration.<br>2006; 14(5):526-<br>535                             | non pertinent |
| 6993 | Agrawal et al.,          | 2006 | J of the American<br>Geriatrics Society.<br>2006; 54(5):790-<br>795                      | non pertinent |
| 6994 | Aftanas et al.,          | 2006 | Neurosci Behav<br>Physiol. 2006;<br>36(2):119-130                                        | non pertinent |
| 6995 | Actrn                    | 2006 | Australian New<br>Zealand Clinical<br>Trials Registry.<br>2006                           | non pertinent |
| 6996 | Buckley et al.,          | 2006 | Annals of nutrition<br>and metabolism.<br>2006; 50(2):108-<br>114                        | non pertinent |

|      |                                                                                    |      |                                                                               |               |
|------|------------------------------------------------------------------------------------|------|-------------------------------------------------------------------------------|---------------|
| 6997 | Multicentre<br>Australian<br>Colorectal-<br>neoplasia<br>Screening (MACS)<br>Group | 2006 | Medical j of<br>Australia. 2006;<br>184(11):546-550                           | non pertinent |
| 6998 | Zubieta et al.,                                                                    | 2005 | J of neuroscience.<br>2005; 25(34):7754-<br>7762                              | non pertinent |
| 6999 | Ziaei et al.,                                                                      | 2005 | BJOG. 2005;<br>112(4):466-469                                                 | non pertinent |
| 7000 | Zhou et al.,                                                                       | 2005 | Chinese j of<br>integrative<br>medicine. 2005;<br>11(1):60-64                 | non pertinent |
| 7001 | Zhan et al.,                                                                       | 2005 | European<br>radiology. 2005;<br>15(8):1752-1756                               | non pertinent |
| 7002 | Zein                                                                               | 2005 | J of hepatology.<br>2005; 42(3):315-<br>322                                   | non pertinent |
| 7003 | Zein et al.,                                                                       | 2005 | Hepatology. 2005;<br>(baltimore, md.).<br>2005; 42(4):762-<br>771             | non pertinent |
| 7004 | Zautra et al.,                                                                     | 2005 | Clinical J of Pain.<br>2005; 21(6):471-<br>477                                | non pertinent |
| 7005 | Zajicek et al.,                                                                    | 2005 | J of neurology,<br>neurosurgery, and<br>psychiatry. 2005;<br>76(12):1664-1669 | non pertinent |
| 7006 | Yousefi et al.,                                                                    | 2005 | J of family<br>practice. 2005;<br>54(12):1094-1095                            | non pertinent |
| 7007 | Yonkers et al.,                                                                    | 2005 | Obstetrics and<br>gynecology. 2005;<br>106(3):492-501                         | non pertinent |
| 7008 | Yogendran et al.,                                                                  | 2005 | Can J Anaesth.<br>2005; 52(1):45-49                                           | non pertinent |
| 7009 | Yin et al.,                                                                        | 2005 | Clinical nutrition<br>(edinburgh,<br>scotland). 2005;<br>24(6):988-997        | non pertinent |
| 7010 | Yardeni et al.,                                                                    | 2005 | Endoscopy. 2005;<br>37(12):1205-1210                                          | non pertinent |
| 7011 | Wu et al.,                                                                         | 2005 | Chinese j of<br>integrative<br>medicine. 2005;<br>11(3):173-178               | non pertinent |
| 7012 | Wright et al.,                                                                     | 2005 | J of viral hepatitis.<br>2005; 12(1):58-66                                    | non pertinent |
| 7013 | Wolff et al.,                                                                      | 2005 | British j of<br>dermatology.<br>2005; 152(6):1296-<br>1303                    | non pertinent |
| 7014 | Winther et al.,                                                                    | 2005 | Scandinavian j of<br>rheumatology.<br>2005; 34(4):302-<br>308                 | non pertinent |
| 7015 | Winner et al.,                                                                     | 2005 | Headache. 2005;<br>45(10):1304-1312                                           | non pertinent |
| 7016 | Win et al.,                                                                        | 2005 | Anesthesia and<br>Analgesia. 2005;<br>101(1):97-102                           | non pertinent |



|      |                      |      |                                                                                     |               |
|------|----------------------|------|-------------------------------------------------------------------------------------|---------------|
| 7017 | Wildgruber et al.,   | 2005 | Neuroimage. 2005; 24(4):1233-1241                                                   | non pertinent |
| 7018 | Wilder-Smith et al., | 2005 | Anesthesiology. 2005; 103(3):619-628                                                | non pertinent |
| 7019 | Wiegel et al.,       | 2005 | Acta Anaesthesiol Scand. 2005; 49(4):552-557                                        | non pertinent |
| 7020 | Wiech et al.,        | 2005 | Neuroimage. 2005; 27(1):59-69                                                       | non pertinent |
| 7021 | Whitlow et al.,      | 2005 | Gynecological surgery. 2005; 2(1):5-6                                               | non pertinent |
| 7022 | Wheeler et al.,      | 2005 | J Neurosurg Anesthesiol. 2005; 17(2):86-90                                          | non pertinent |
| 7023 | Wémeau et al.,       | 2005 | J of clinical endocrinology and metabolism. 2005; 90(2):841-848                     | non pertinent |
| 7024 | Weklsr et al.,       | 2005 | J of anesthesia. 2005; 19(1):36-39                                                  | non pertinent |
| 7025 | Weiss et al.,        | 2005 | J of the American Academy of Child and Adolescent Psychiatry. 2005; 44(7):647-655   | non pertinent |
| 7026 | Watson et al.,       | 2005 | Ambulatory surgery. 2005; 12(1):35-38                                               | non pertinent |
| 7027 | Wassilew             | 2005 | J of the european academy of dermatology and venereology : JEADV. 2005; 19(1):47-55 | non pertinent |
| 7028 | Warshaw et al.,      | 2005 | J of the American Academy of Dermatology. 2005; 53(4):578-584                       | non pertinent |
| 7029 | Vranken et al.,      | 2005 | Pain. 2005; 118(1-2):224-231                                                        | non pertinent |
| 7030 | Volmanen et al.,     | 2005 | Acta anaesthesiologica Scandinavica. 2005; 49(4):453-458                            | non pertinent |
| 7031 | Vladyka et al.,      | 2005 | J Neurosurg. 2005; 102 Suppl:214-219                                                | non pertinent |
| 7032 | Versiani et al.,     | 2005 | CNS Drugs. 2005; 19(2):137-146                                                      | non pertinent |
| 7033 | Vergara et al.,      | 2005 | European j of pediatrics. 2005; 164(6):377-382                                      | non pertinent |
| 7034 | Vercellini et al.,   | 2005 | Fertility and sterility. 2005; 84(5):1375-1387                                      | non pertinent |

|      |                      |      |                                                                                |               |
|------|----------------------|------|--------------------------------------------------------------------------------|---------------|
| 7035 | Van Marle et al.,    | 2005 | International j of clinical pharmacology and therapeutics. 2005; 43(6):282-293 | non pertinent |
| 7036 | Van Ganse et al.,    | 2005 | Pharmacoepidemiology and drug safety. 2005; 14(4):249-255                      | non pertinent |
| 7037 | Van der Post et al., | 2005 | Br J Clin Pharmacol. 2005; 60(2):128-136                                       | non pertinent |
| 7038 | Usher et al.,        | 2005 | Paediatr Anaesth. 2005; 15(1):23-28                                            | non pertinent |
| 7039 | Uher et al.,         | 2005 | Biol Psychiatry. 2005; 58(12):990-997                                          | non pertinent |
| 7040 | Tyrell et al.,       | 2005 | Radiotherapy and oncology. 2005; 76(1):4-10                                    | non pertinent |
| 7041 | Turner et al.,       | 2005 | Psychopharmacology. 2005; 178(2-3):286-295                                     | non pertinent |
| 7042 | Turker et al.,       | 2005 | J of cardiothoracic and vascular anesthesia. 2005; 19(4):468-474               | non pertinent |
| 7043 | Tsui et al.,         | 2005 | Paediatr Anaesth. 2005; 15(5):397-401                                          | non pertinent |
| 7044 | Travis et al.,       | 2005 | Inflammatory bowel diseases. 2005; 11(8):713-719                               | non pertinent |
| 7045 | Torquati et al.,     | 2005 | Neuroimage. 2005; 26(1):48-56                                                  | non pertinent |
| 7046 | Toplak et al.,       | 2005 | Diabetes, obesity & metabolism. 2005; 7(6):699-708                             | non pertinent |
| 7047 | Tong et al.,         | 2005 | J of nephrology. 2005; 18(2):204-208                                           | non pertinent |
| 7048 | Thome et al.,        | 2005 | J Neurosurg Spine. 2005; 3(2):129-141                                          | non pertinent |
| 7049 | Thatcher et al.,     | 2005 | Lancet (london, england). 2005; 366(9496):1527-1537                            | non pertinent |
| 7050 | Taylor et al.,       | 2005 | Academic emergency medicine. 2005                                              | non pertinent |
| 7051 | Taskaynatan et al.,  | 2005 | Tohoku j of experimental medicine. 2005; 205(1):19-25                          | non pertinent |
| 7052 | Tascioglu et al.,    | 2005 | Rheumatology international. 2005; 26(1):21-29                                  | non pertinent |

|      |                        |      |                                                                                       |               |
|------|------------------------|------|---------------------------------------------------------------------------------------|---------------|
| 7053 | Tariq et al.,          | 2005 | JPMA. The j of the pakistan medical association. 2005; 55(5):202-204                  | non pertinent |
| 7054 | Tariot et al.,         | 2005 | American j of geriatric psychiatry. 2005; 13(11):942-949                              | non pertinent |
| 7055 | Tant et al.,           | 2005 | Current therapeutic research – clinical and experimental. 2005; 66(6):511-521         | non pertinent |
| 7056 | Track et al.,          | 2005 | Gut. 2005; 54(12):1707-1713                                                           | non pertinent |
| 7057 | Tabbert et al.,        | 2005 | Int J Psychophysiol. 2005; 57(1):15-23                                                | non pertinent |
| 7058 | Sykora et al.,         | 2005 | J of clinical gastroenterology. 2005; 39(8):692-698                                   | non pertinent |
| 7059 | Swanson et al.,        | 2005 | Treatments in respiratory medicine. 2005; 4(1):31-39                                  | non pertinent |
| 7060 | Sundarathiti et al.,   | 2005 | Chotmaihet thangphaet (J of the Medical Association of Thailand). 2005; 88(4):513-520 | non pertinent |
| 7061 | Sughondhabirom et al., | 2005 | Psychopharmacol ogy. 2005; 180(3):436-446                                             | non pertinent |
| 7062 | Struys et al.,         | 2005 | Anesthesiology. 2005; 103(4):730-743                                                  | non pertinent |
| 7063 | Stegmayr et al.,       | 2005 | Scandinavian j of urology and nephrology. 2005; 39(6):489-497                         | non pertinent |
| 7064 | Staud et al.,          | 2005 | J Pain. 2005; 6(5):323-332                                                            | non pertinent |
| 7065 | Starr et al.,          | 2005 | J of the national medical association. 2005; 97(10 Suppl):11-16                       | non pertinent |
| 7066 | Stamenova et al.,      | 2005 | European j of neurology. 2005; 12(6):453-461                                          | non pertinent |
| 7067 | Spohr et al.,          | 2005 | Minerva anesthesiologica. 2005; 71(6):291-296                                         | non pertinent |
| 7068 | Spencer et al.,        | 2005 | CNS spectrums. 2005; 10(10 SUPPL 15):14-21                                            | non pertinent |
| 7069 | Speel et al.,          | 2005 | J of sexual medicine. 2005; 2(2):207-212                                              | non pertinent |

|      |                    |      |                                                                             |               |
|------|--------------------|------|-----------------------------------------------------------------------------|---------------|
| 7070 | Smeets et al.,     | 2005 | European j of vascular and endovascular surgery. 2005;                      | non pertinent |
| 7071 | Sir et al.,        | 2005 | J of clinical psychiatry. 2005; 66(10):1312-1320                            | non pertinent |
| 7072 | Singh et al.,      | 2005 | Indian j of pediatrics. 2005; 72(9):741-744                                 | non pertinent |
| 7073 | Silva et al.,      | 2005 | J of child and adolescent psychopharmacology. 2005; 15(4):637-654           | non pertinent |
| 7074 | Shelley et al.,    | 2005 | Australian & New Zealand j of obstetrics & gynaecology. 2005; 45(2):122-127 | non pertinent |
| 7075 | Shaheen et al.,    | 2005 | Hepatology (baltimore, md.). 2005; 41(3):588-594                            | non pertinent |
| 7076 | Seikaly et al.,    | 2005 | J of pediatric orthopedics. 2005; 25(6):786-791                             | non pertinent |
| 7077 | Seftel et al.,     | 2005 | International j of impotence research. 2005; 17(5):455-461                  | non pertinent |
| 7078 | Schreiber et al.,  | 2005 | Gastroenterology. 2005; 129(3):807-818                                      | non pertinent |
| 7079 | Schmitter et al.,  | 2005 | J of oral and maxillofacial surgery. 2005; 63(9):1295-1303                  | non pertinent |
| 7080 | Schienle et al.,   | 2005 | Int J Psychophysiol. 2005; 57(1):69-77                                      | non pertinent |
| 7081 | Scheffer et al.,   | 2005 | American j of psychiatry. 2005; 162(1):58-64                                | non pertinent |
| 7082 | Scharf et al.,     | 2005 | Sleep. 2005; 28(6):720-727                                                  | non pertinent |
| 7083 | Sato et al.,       | 2005 | Archives of internal medicine. 2005; 165(15):1743-1748                      | non pertinent |
| 7084 | Sätälä et al.,     | 2005 | American j of physical medicine & rehabilitation. 2005; 84(5):355-365       | non pertinent |
| 7085 | Sathyan et al.,    | 2005 | Clinical pharmacokinetics. 2005; 44 Suppl 1:17-24                           | non pertinent |
| 7086 | Saricaoglu et al., | 2005 | Anesthesia and Analgesia. 2005; 101(3):904-909                              | non pertinent |

|      |                        |      |                                                                       |               |
|------|------------------------|------|-----------------------------------------------------------------------|---------------|
| 7087 | Sandel et al.,         | 2005 | Cancer Nurs. 2005; 28(4):301-309                                      | non pertinent |
| 7088 | Sanchez-Borges et al., | 2005 | Annals of allergy, asthma and immunology. 2005; 94(1):34-38           | non pertinent |
| 7089 | Samarkandi et al.,     | 2005 | European j of anaesthesiology. 2005; 22(3):189-196                    | non pertinent |
| 7090 | Sáez-Llorens et al.,   | 2005 | Pediatric infectious disease j. 2005; 24(4):293-300                   | non pertinent |
| 7091 | Sacchidanand et al.,   | 2005 | International j of infectious diseases. 2005; 9(5):251-261            | non pertinent |
| 7092 | Sabatinelli et al.,    | 2005 | Neuroimage. 2005; 24(4):1265-1270                                     | non pertinent |
| 7093 | Ryans et al.,          | 2005 | Rheumatology (oxford, england). 2005; 44(4):529-535                   | non pertinent |
| 7094 | Roy-Byrne et al.,      | 2005 | Archives of general psychiatry. 2005; 62(3):290-298                   | non pertinent |
| 7095 | Rossignol et al.,      | 2005 | Clinical gastroenterology and hepatology. 2005; 3(10):987-991         | non pertinent |
| 7096 | Rosenberg et al.,      | 2005 | Sleep medicine. 2005; 6(1):15-22                                      | non pertinent |
| 7097 | Rosenberg et al.,      | 2005 | British j of clinical pharmacology. 2005; 60(1):7-16                  | non pertinent |
| 7098 | Ronkin et al.,         | 2005 | Obstetrics and gynecology. 2005; 105(6):1397-1404                     | non pertinent |
| 7099 | Rodrigues et al.,      | 2005 | Pain. 2005; 115(1-2):5-11                                             | non pertinent |
| 7100 | Roca et al.,           | 2005 | J Spinal Disord Tech. 2005; 18 Suppl: 82-89                           | non pertinent |
| 7101 | Reynders et al.,       | 2005 | Epilepsy Behav. 2005; 7(3):419-429                                    | non pertinent |
| 7102 | Reid et al.,           | 2005 | Addiction. 2005; 100 Suppl 1:(SUPPL 1):32-42                          | non pertinent |
| 7103 | Pukall et al.,         | 2005 | Pain. 2005; 115(1-2):118-127                                          | non pertinent |
| 7104 | Prantera et al.,       | 2005 | Inflammatory bowel diseases. 2005; 11(5):421-427                      | non pertinent |
| 7105 | Praditsuwan et al.,    | 2005 | Chotmaiht thangphaet (J of the Medical Association of Thailand). 2005 | non pertinent |

|      |                         |      |                                                                                         |               |
|------|-------------------------|------|-----------------------------------------------------------------------------------------|---------------|
| 7106 | Powers et al.,          | 2005 | Pediatrics. 2005; 115(6):1666-1674                                                      | non pertinent |
| 7107 | Pourtois et al.,        | 2005 | Neuroimage. 2005; 26(1):149-163                                                         | non pertinent |
| 7108 | Pourtois et al.,        | 2005 | Cortex. 2005; 41(1):49-59                                                               | non pertinent |
| 7109 | Potkin et al.,          | 2005 | J of clinical psychopharmacology. 2005; 25(4):301-310                                   | non pertinent |
| 7110 | Posey et al.,           | 2005 | Cancer chemotherapy and pharmacology. 2005; 56(2):182-188                               | non pertinent |
| 7111 | Pleger et al.,          | 2005 | Ann Neurol. 2005 57(3):425-429                                                          | non pertinent |
| 7112 | Piola et al.,           | 2005 | Lancet (london, england). 2005; 365(9469):1467-1473                                     | non pertinent |
| 7113 | Phongmany et al.,       | 2005 | Transactions of the Royal Society of Tropical Medicine and Hygiene. 2005; 99(6):451-458 | non pertinent |
| 7114 | Petrovic et al.,        | 2005 | Neuron. 2005; 46(6):957-969                                                             | non pertinent |
| 7115 | Pelham et al.,          | 2005 | J of the American Academy of Child and Adolescent Psychiatry. 2005; 44(6):522-529       | non pertinent |
| 7116 | Pauli et al.,           | 2005 | Int J Psychophysiol. 2005; 57(1):33-41                                                  | non pertinent |
| 7117 | Paschoalini Mda et al., | 2005 | Chest. 2005; 128(2):684-689                                                             | non pertinent |
| 7118 | Pariente et al.,        | 2005 | Neuroimage. 2005; 25(4):1161-1167                                                       | non pertinent |
| 7119 | Pandey et al.,          | 2005 | J canadien d'anesthesie (Canadian j of anaesthesia). 2005; 52(8):827-831                | non pertinent |
| 7120 | Pandey et al.,          | 2005 | J of neurosurgical anesthesiology. 2005; 17(2):65-68                                    | non pertinent |
| 7121 | Packer et al.,          | 2005 | J of cardiac failure. 2005; 11(1):12-20                                                 | non pertinent |
| 7122 | Overholt et al.,        | 2005 | Gastrointestinal endoscopy. 2005; 62(4):488-498                                         | non pertinent |
| 7123 | Omran et al.,           | 2005 | Egyptian j of anaesthesia. 2005; 21(4):295-300                                          | non pertinent |

|      |                  |      |                                                                                          |               |
|------|------------------|------|------------------------------------------------------------------------------------------|---------------|
| 7124 | Ohmizo et al.,   | 2005 | J canadien<br>d'anesthesie<br>(Canadian j of<br>anaesthesia).<br>2005; 52(6):595-<br>599 | non pertinent |
| 7125 | Oddsson et al.,  | 2005 | Contraception.<br>2005; 71(3):176-<br>182                                                | non pertinent |
| 7126 | O'Riain et al.,  | 2005 | Anesthesia and<br>Analgesia. 2005;<br>100(1):244-249                                     | non pertinent |
| 7127 | O'Mahony et al., | 2005 | Gastroenterology.<br>2005; 128(3):541-<br>551                                            | non pertinent |
| 7128 | Niethard et al., | 2005 | J of rheumatology.<br>2005; 32(12):2384-<br>2392                                         | non pertinent |
| 7129 | Nielsen et al.,  | 2005 | Neuroimage.<br>2005; 27(3):520-<br>532                                                   | non pertinent |
| 7130 | Nickel et al.,   | 2005 | J of urology. 2005;<br>173(4):1252-1255                                                  | non pertinent |
| 7131 | Newton et al.,   | 2005 | Psychopharmacol<br>ogy. 2005;<br>182(3):426-435                                          | non pertinent |
| 7132 | Nehra et al.,    | 2005 | J of urology. 2005;<br>173(6):2067-2071                                                  | non pertinent |
| 7133 | Nct – Jacobsen   | 2005 | National Library of<br>Medicine. 2005                                                    | non pertinent |
| 7134 | Nct – Lee        | 2005 | National Library of<br>Medicine. 2005                                                    | non pertinent |
| 7135 | Nct – Francisco  | 2005 | National Library of<br>Medicine. 2005                                                    | non pertinent |
| 7136 | Nct – Hassett    | 2005 | National Library of<br>Medicine. 2005                                                    | non pertinent |
| 7137 | Nct – Flood      | 2005 | National Library of<br>Medicine. 2005                                                    | non pertinent |
| 7138 | Nct - Shapira    | 2005 | National Library of<br>Medicine. 2005                                                    | non pertinent |
| 7139 | Nct - Gordon     | 2005 | National Library of<br>Medicine. 2005                                                    | non pertinent |
| 7140 | Nct – Zubieta    | 2005 | National Library of<br>Medicine. 2005                                                    | non pertinent |
| 7141 | Nct - Palfi      | 2005 | National Library of<br>Medicine. 2005                                                    | non pertinent |
| 7142 | Nct - Harrison   | 2005 | National Library of<br>Medicine. 2005                                                    | non pertinent |
| 7143 | Nct – Friedman   | 2005 | National Library of<br>Medicine. 2005                                                    | non pertinent |
| 7144 | Nct - Weil       | 2005 | National Library of<br>Medicine. 2005                                                    | non pertinent |
| 7145 | Nct - Martire    | 2005 | National Library of<br>Medicine. 2005                                                    | non pertinent |
| 7146 | Nct - Dumonceau  | 2005 | National Library of<br>Medicine. 2005                                                    | non pertinent |
| 7147 | Nct - Holtrop    | 2005 | National Library of<br>Medicine. 2005                                                    | non pertinent |
| 7148 | Nct – Schnitzer  | 2005 | National Library of<br>Medicine. 2005                                                    | non pertinent |
| 7149 | Nct – Naylor     | 2005 | National Library of<br>Medicine. 2005                                                    | non pertinent |

|      |                       |      |                                                                            |               |
|------|-----------------------|------|----------------------------------------------------------------------------|---------------|
| 7150 | Navan et al.,         | 2005 | European j of neurology. 2005; 12(1):1-8                                   | non pertinent |
| 7151 | Naesh et al.,         | 2005 | European j of anaesthesiology. 2005; 22(10):768-773                        | non pertinent |
| 7152 | Mustola et al.,       | 2005 | Acta anaesthesiologica Scandinavica. 2005; 49(2):215-221                   | non pertinent |
| 7153 | Muñoz et al.,         | 2005 | Anesthesia and Analgesia. 2005; 101(2):371-376                             | non pertinent |
| 7154 | Mukwaya et al.,       | 2005 | Antimicrobial agents and chemotherapy. 2005; 49(12):4903-4910              | non pertinent |
| 7155 | Muehlbacher et al.,   | 2005 | J of clinical psychopharmacology. 2005; 25(6):580-583                      | non pertinent |
| 7156 | Morgan et al.,        | 2005 | Gut. 2005; 54(5):601-607                                                   | non pertinent |
| 7157 | Morgan et al.,        | 2005 | Gastroenterology. 2005; 128(4):882-890                                     | non pertinent |
| 7158 | Moore et al.,         | 2005 | International clinical psychopharmacology. 2005; 20(3):131-137             | non pertinent |
| 7159 | Molimard et al.,      | 2005 | Respiratory medicine. 2005; 99(6):770-778                                  | non pertinent |
| 7160 | Mohammadzadeh et al., | 2005 | Saudi medical j. 2005; 26(8):1231-1234                                     | non pertinent |
| 7161 | Moen et al.,          | 2005 | American j of cancer. 2005; 4(5):327-333                                   | non pertinent |
| 7162 | Modic et al.,         | 2005 | Radiology. 2005; 237(2):597-604                                            | non pertinent |
| 7163 | Miner et al.,         | 2005 | Academic emergency medicine. 2005; 12(3):190-196                           | non pertinent |
| 7164 | Mikol et al.,         | 2005 | Multiple sclerosis (houndmills, basingstoke, england). 2005; 11(5):585-591 | non pertinent |
| 7165 | Michel et al.,        | 2005 | Arthritis and rheumatism. 2005; 52(3):779-                                 | non pertinent |
| 7166 | Merle et al.,         | 2005 | Annales francaises d'anesthesie ET de reanimation. 2005; 24(1):13-18       | non pertinent |
| 7167 | Merenstein et al.,    | 2005 | J of family practice. 2005; 54(2):144-151                                  | non pertinent |



|      |                   |      |                                                                 |               |
|------|-------------------|------|-----------------------------------------------------------------|---------------|
| 7168 | Ménigaux et al.,  | 2005 | Anesthesia and Analgesia. 2005; 100(5):1394-1399                | non pertinent |
| 7169 | Mehta et al.,     | 2005 | Psychopharmacology (Berl). 2005; 180(4):654-663                 | non pertinent |
| 7170 | McLean            | 2005 | J Electromyogr Kinesiol. 2005; 15(6):527-535                    | non pertinent |
| 7171 | McClung et al.,   | 2005 | Archives of internal medicine. 2005; 165(15):1762-1768          | non pertinent |
| 7172 | Mazières et al.,  | 2005 | J of rheumatology. 2005; 32(8):1563-1570                        | non pertinent |
| 7173 | Mathew et al.,    | 2005 | Headache. 2005; 45(4):293-307                                   | non pertinent |
| 7174 | Martoni et al.,   | 2005 | European j of cancer (Oxford, England : 1990); 41(1):81-92      | non pertinent |
| 7175 | Marson et al.,    | 2005 | Lancet (london, england). 2005; 365(9476):2007-2013             | non pertinent |
| 7176 | Marco et al.,     | 2005 | Academic emergency medicine. 2005; 12(4):282-288                | non pertinent |
| 7177 | Mancini et al.,   | 2005 | Neurological sciences. 2005; 26(1):26-31                        | non pertinent |
| 7178 | Maltoni et al.,   | 2005 | Supportive care in cancer. 2005; 13(11):888-894                 | non pertinent |
| 7179 | Malkin et al.,    | 2005 | Infection and immunity. 2005; 73(6):3677-3685                   | non pertinent |
| 7180 | Magnussen et al., | 2005 | J of health psychology. 2005; 10(2):233-243                     | non pertinent |
| 7181 | Magni et al.,     | 2005 | Neurosurg Anesthesiol. 2005; 17(3):134-138                      | non pertinent |
| 7182 | Madisch et al.,   | 2005 | International j of colorectal disease. 2005; 20(4):312-316      | non pertinent |
| 7183 | Ly-Pen et al.,    | 2005 | Arthritis and rheumatism. 2005; 52(2):612-                      | non pertinent |
| 7184 | Lorenz et al.,    | 2005 | Brain Behav Immun. 2005; 19(4):283-295                          | non pertinent |
| 7185 | Lohmander et al., | 2005 | Annals of the rheumatic diseases. 2005; 64(3):449-456           | non pertinent |
| 7186 | Lister et al.,    | 2005 | American j of obstetrics and gynecology. 2005; 193(4):1338-1343 | non pertinent |

|      |                         |      |                                                                                   |               |
|------|-------------------------|------|-----------------------------------------------------------------------------------|---------------|
| 7187 | Lingford-Hughes et al., | 2005 | Psychopharmacology (Berl). 2005; 180(4):595-606                                   | non pertinent |
| 7188 | Leung et al.,           | 2005 | J Altern Complement Med. 2005; 11(4):653-661                                      | non pertinent |
| 7189 | Leslie et al.,          | 2005 | Anaesthesia. 2005; 60(3):239-244                                                  | non pertinent |
| 7190 | Leniger et al.,         | 2005 | Headache. 2005; 45(1):42-46                                                       | non pertinent |
| 7191 | Lehman et al.,          | 2005 | Arthritis and rheumatism. 2005; 52(5):1360-                                       | non pertinent |
| 7192 | Legrain et al.,         | 2005 | Clin Neurophysiol. 2005; 116(9):2165-2174                                         | non pertinent |
| 7193 | Legeby et al.,          | 2005 | Acta anaesthesiologica Scandinavica. 2005; 49(9):1360-1366                        | non pertinent |
| 7194 | Lee et al.,             | 2005 | Acta anaesthesiologica Scandinavica. 2005; 1477-1482                              | non pertinent |
| 7195 | Lee et al.,             | 2005 | Progress in neuro-psychopharmacology & biological psychiatry. 2005; 29(5):639-647 | non pertinent |
| 7196 | LeCheminant et al.,     | 2005 | J of the American College of Nutrition. 2005; 24(5):347-353                       | non pertinent |
| 7197 | Le Loet et al.,         | 2005 | BMC musculoskeletal disorders. 2005; 6                                            | non pertinent |
| 7198 | Laugesen et al.,        | 2005 | Clinical pharmacology and therapeutics. 2005; 77(4):312-323                       | non pertinent |
| 7199 | Lane et al.,            | 2005 | Anaesthesia. 2005; 60(5):453-457                                                  | non pertinent |
| 7200 | Lamet et al.,           | 2005 | Inflammatory bowel diseases. 2005; 11(7):625-630                                  | non pertinent |
| 7201 | Lai et al.,             | 2005 | Ophthalmology. 2005; 112(4):574-579                                               | non pertinent |
| 7202 | Kussman et al.,         | 2005 | J Cardiothorac Vasc Anesth. 2005; 19(3):316-321                                   | non pertinent |
| 7203 | Kushner et al.,         | 2005 | Obstetrics and gynecology. 2005; 106(2):227-233                                   | non pertinent |

|      |                    |      |                                                                                               |               |
|------|--------------------|------|-----------------------------------------------------------------------------------------------|---------------|
| 7204 | Kurihara et al.,   | 2005 | Nephrology<br>dialysis<br>transplantation.<br>2005; 20(2):424-<br>430                         | non pertinent |
| 7205 | Kurata et al.,     | 2005 | Anesth Analg.<br>2005; 101(2):449-<br>456                                                     | non pertinent |
| 7206 | Kudrow et al.,     | 2005 | Headache. 2005;<br>45(9):1151-1162                                                            | non pertinent |
| 7207 | Kucukemre et al.,  | 2005 | European j of<br>anaesthesiology.<br>2005; 22(5):378-<br>385                                  | non pertinent |
| 7208 | Kratochvil et al., | 2005 | J of the American<br>Academy of Child<br>and Adolescent<br>Psychiatry. 2005;<br>44(9):915-924 | non pertinent |
| 7209 | Kozuma et al.,     | 2005 | Hypertension<br>research. 2005;<br>28(9):711-718                                              | non pertinent |
| 7210 | Koyama et al.,     | 2005 | Proc Natl Acad<br>Sci U S A. 2005;<br>102(36):12950-<br>12955                                 | non pertinent |
| 7211 | Korovessis et al., | 2005 | European spine j.<br>2005; 14(7):630-<br>638                                                  | non pertinent |
| 7212 | Komiyama et al.,   | 2005 | J of orofacial pain.<br>2005; 19(2):119-<br>126                                               | non pertinent |
| 7213 | Köksal et al.,     | 2005 | J of<br>gastroenterology<br>and hepatology.<br>2005; 20(4):637-<br>642                        | non pertinent |
| 7214 | Kodama et al.,     | 2005 | European j of<br>clinical nutrition.<br>2005; 59(3):384-<br>392                               | non pertinent |
| 7215 | Knight et al.,     | 2005 | Neuroimage.<br>2005; 26(4):1193-<br>1200                                                      | non pertinent |
| 7216 | Killgore et al.,   | 2005 | Neuroreport.<br>2005; 16(15):1671-<br>1675                                                    | non pertinent |
| 7217 | Kilkens et al.,    | 2005 | Aliment<br>Pharmacol Ther.<br>2005; 22(9):865-<br>874                                         | non pertinent |
| 7218 | Kiderman et al.,   | 2005 | British j of general<br>practice. 2005;<br>55(512):218-221                                    | non pertinent |
| 7219 | Kekec et al.,      | 2005 | Mount Sinal j of<br>medicine. New<br>York. 2005;<br>72(6):385-388                             | non pertinent |
| 7220 | Keidan et al.,     | 2005 | J of urology. 2005;<br>174(4 Pt 2):1598-<br>1600                                              | non pertinent |
| 7221 | Katz et al.,       | 2005 | J of Pain. 2005;<br>6(10):656-661                                                             | non pertinent |

|      |                   |      |                                                                          |               |
|------|-------------------|------|--------------------------------------------------------------------------|---------------|
| 7222 | Kato et al,       | 2005 | Alimentary pharmacology & therapeutics. 2005; 21 Suppl 2:27-31           | non pertinent |
| 7223 | Kasper et al,     | 2005 | American j of geriatric psychiatry. 2005; 13(10):884-891                 | non pertinent |
| 7224 | Karpel et al,     | 2005 | Annals of pharmacotherapy. 2005; 39(12):1977-1983                        | non pertinent |
| 7225 | Kardash et al,    | 2005 | J canadien d'anesthesie (Canadian j of anaesthesia). 2005; 52(6):613-617 | non pertinent |
| 7226 | Kandziora et al,  | 2005 | Injury. 2005; 36 Suppl 2:B27-35                                          | non pertinent |
| 7227 | Kanai et al,      | 2005 | Japanese j of anesthesiology. 2005; 54(1):8-13                           | non pertinent |
| 7228 | Kamiji et al,     | 2005 | Arquivos de gastroenterologia. 2005; 42(3):167-172                       | non pertinent |
| 7229 | Kalisch et al,    | 2005 | J Cogn Neurosci. 2005; 17(6):874-883                                     | non pertinent |
| 7230 | Kakagia et al,    | 2005 | Annals of plastic surgery. 2005; 55(3):258-261                           | non pertinent |
| 7231 | Kain et al,       | 2005 | Anesthesiology. 2005; 102(4):720-726                                     | non pertinent |
| 7232 | Jünemann et al,   | 2005 | European urology. 2005; 48(3):478-482                                    | non pertinent |
| 7233 | Johnstone et al,  | 2005 | Neuroimage. 2005; 25(4):1112-1113                                        | non pertinent |
| 7234 | Johnston et al,   | 2005 | Pediatric infectious disease j. 2005; 24(3):225-232                      | non pertinent |
| 7235 | Jermany et al,    | 2005 | J of clinical pharmacology. 2005; 45(10):1172-1178                       | non pertinent |
| 7236 | Jean et al,       | 2005 | Acta anaesthesiologica Taiwanica. 2005; 43(2):73-77                      | non pertinent |
| 7237 | Järnerot et al,   | 2005 | Gastroenterology. 2005; 128(7):1805-1811                                 | non pertinent |
| 7238 | Janssen et al,    | 2005 | Lancet (london, england). 2005; 365(9454):123-129                        | non pertinent |
| 7239 | Jalowiecki et al, | 2005 | Anesthesiology. 2005; 103(2):269-273                                     | non pertinent |

|      |                          |      |                                                                                                      |               |
|------|--------------------------|------|------------------------------------------------------------------------------------------------------|---------------|
| 7240 | Jacobsohn et al.,        | 2005 | J canadien<br>d'anesthesie<br>(Canadian j of<br>anaesthesia).<br>2005; 52(8):848-<br>857             | non pertinent |
| 7241 | Jackson et al.,          | 2005 | Neuroimage.<br>2005; 24(3):771-<br>779                                                               | non pertinent |
| 7242 | Ivani et al.,            | 2005 | Paediatric<br>anaesthesia. 2005;<br>15(6):491-494                                                    | non pertinent |
| 7243 | Isrctn – McGregor        | 2005 | ISRCTN registry.<br>2005                                                                             | non pertinent |
| 7244 | Ishitani et al.,         | 2005 | Psychiatry Clin<br>Neurosci. 2005;<br>59(6):644-651                                                  | non pertinent |
| 7245 | Inoue et al.,            | 2005 | J of anesthesia.<br>2005; 19(1):12-16                                                                | non pertinent |
| 7246 | Ilfeld et al.,           | 2005 | Anesthesia and<br>Analgesia. 2005;<br>100(4):1172-1178                                               | non pertinent |
| 7247 | Iannetti et al.,         | 2005 | Neuroimage.<br>2005; 28(3):708-<br>719                                                               | non pertinent |
| 7248 | Huguenin et al.,         | 2005 | British j of sports<br>medicine. 2005;<br>39(2):84-90                                                | non pertinent |
| 7249 | Hu et al.,               | 2005 | Chinese j of<br>clinical<br>rehabilitation.<br>2005; 9(18):8-9                                       | non pertinent |
| 7250 | Howard et al.,           | 2005 | J Neurol Neurosurg<br>Psychiatry. 2005;<br>76(11):1558-1564                                          | non pertinent |
| 7251 | Hooper et al.,           | 2005 | Climacteric. 2005;<br>8(3):251-262                                                                   | non pertinent |
| 7252 | Home et al.,             | 2005 | Diabetologia.<br>2005; 48(9):1726-<br>1735                                                           | non pertinent |
| 7253 | Holman et al.,           | 2005 | Arthritis and<br>rheumatism.<br>2005; 52(8):2495-                                                    | non pertinent |
| 7254 | Holger et al.,           | 2005 | American j of<br>emergency<br>medicine. 2005;<br>23(3):248-252                                       | non pertinent |
| 7255 | Holdgate et al.,         | 2005 | J of urology. 2005;<br>174(2):572-575                                                                | non pertinent |
| 7256 | Hirunwiwatkul et<br>al., | 2005 | Chotmaihet<br>thangphaet (J of<br>the Medical<br>Association of<br>Thailand). 2005;<br>88(5):647-650 | non pertinent |
| 7257 | Hellings et al.,         | 2005 | J of child and<br>adolescent<br>psychopharmacol<br>ogy. 2005;<br>15(4):682-692                       | non pertinent |
| 7258 | Heapy et al.,            | 2005 | Pain. 2005;<br>118(3):360-368                                                                        | non pertinent |

|      |                   |      |                                                                              |               |
|------|-------------------|------|------------------------------------------------------------------------------|---------------|
| 7259 | Hayton et al.,    | 2005 | J of bone and joint surgery. American volume. 2005; 87(3):503-507            | non pertinent |
| 7260 | Haupt et al.,     | 2005 | International j of clinical pharmacology and therapeutics. 2005; 43(2):71-77 | non pertinent |
| 7261 | Hasebe et al.,    | 2005 | J of hypertension. 2005; 23(2):445-453                                       | non pertinent |
| 7262 | Han et al.,       | 2005 | Acta Anaesthesiol Scand. 2005; 49(1):85-91                                   | non pertinent |
| 7263 | Haila et al.,     | 2005 | Homeopathy. 2005; 94(3):175-181                                              | non pertinent |
| 7264 | Gurbet et al.,    | 2005 | International j of obstetric anesthesia. 2005; 14(2):121-125                 | non pertinent |
| 7265 | Gunusen et al.,   | 2005 | Turk anesteziyoloji ve reanimasyon dernegi dergisi. 2005; 33(4):298-306      | non pertinent |
| 7266 | Grunau et al.,    | 2005 | Pain. 2005; 113(3):293-300                                                   | non pertinent |
| 7267 | Graziosi et al.,  | 2005 | Human reproduction (Oxford, England). 2005; 20(8):2340-2347                  | non pertinent |
| 7268 | Grabska et al.,   | 2005 | J Perinatol. 2005; 25(1):33-35                                               | non pertinent |
| 7269 | Gotoh et al.,     | 2005 | BJU international. 2005; 96(4):581-586                                       | non pertinent |
| 7270 | Gori et al.,      | 2005 | Brain Res Bull. 2005; 65(4):297-300                                          | non pertinent |
| 7271 | Gordon et al.,    | 2005 | Gut. 2005; 54(4):540-545                                                     | non pertinent |
| 7272 | Goodman et al.,   | 2005 | Regional anesthesia and pain medicine. 2005; 30(2):134-139                   | non pertinent |
| 7273 | Gonenne et al.,   | 2005 | Clinical gastroenterology and hepatology. 2005; 3(8):784-791                 | non pertinent |
| 7274 | Goldstein et al., | 2005 | Pain. 2005; 116(1-2):109-118                                                 | non pertinent |
| 7275 | Goldmeier et al., | 2005 | International j of STD & AIDS. 2005; 16(3):196-200                           | non pertinent |

|      |                  |      |                                                                                   |               |
|------|------------------|------|-----------------------------------------------------------------------------------|---------------|
| 7276 | Goel et al.,     | 2005 | J of anaesthesiology, clinical pharmacology. 2005; 21(4):389-393                  | non pertinent |
| 7277 | Ginström et al., | 2005 | Acta oto-laryngologica. 2005; 125(9):972-975                                      | non pertinent |
| 7278 | Gilron et al.,   | 2005 | Pain. 2005; 113(1-2):191-200                                                      | non pertinent |
| 7279 | Gillath et al.,  | 2005 | Neuroimage. 2005; 28(4):835-847                                                   | non pertinent |
| 7280 | Geraets et al.,  | 2005 | Australian j of physiotherapy. 2005; 51(2):87-94                                  | non pertinent |
| 7281 | Gendreau et al., | 2005 | J of rheumatology. 2005; 32(10):1975-1985                                         | non pertinent |
| 7282 | Gawel et al.,    | 2005 | Headache. 2005; 45(1):7-16                                                        | non pertinent |
| 7283 | Gallez et al.,   | 2005 | J of neurophysiology. 2005; 94(5):3509-3515                                       | non pertinent |
| 7284 | Gagiano et al.,  | 2005 | Psychopharmacol ogy. 2005; 179(3):629-636                                         | non pertinent |
| 7285 | Gach et al.,     | 2005 | Clinical and experimental dermatology. 2005; 30(1):14-16                          | non pertinent |
| 7286 | Frölich et al.,  | 2005 | Anesthesia and Analgesia. 2005; 100(2):481-486                                    | non pertinent |
| 7287 | Freeman et al.,  | 2005 | Spine. 2005; 30(21):2369-2377                                                     | non pertinent |
| 7288 | Freedman et al., | 2005 | Multiple sclerosis (houndmills, basingstoke, england). 2005; 11(1):41-45          | non pertinent |
| 7289 | Frass et al.,    | 2005 | Homeopathy. 2005; 94(2):75-80                                                     | non pertinent |
| 7290 | Fraser et al.,   | 2005 | Annals of the rheumatic diseases. 2005; 64(6):859-864                             | non pertinent |
| 7291 | Foster et al.,   | 2005 | J of the American Academy of Dermatology. 2005; 53(5):789-809                     | non pertinent |
| 7292 | Fong et al.,     | 2005 | Anaesthesia and intensive care. 2005; 33(1):73-77                                 | non pertinent |
| 7293 | Findling et al., | 2005 | J of the American Academy of Child and Adolescent Psychiatry. 2005; 44(5):409-417 | non pertinent |

|      |                    |      |                                                                                          |               |
|------|--------------------|------|------------------------------------------------------------------------------------------|---------------|
| 7294 | Findling et al.,   | 2005 | J of pediatrics.<br>2005; 147(3):348-354                                                 | non pertinent |
| 7295 | Fillingim et al.,  | 2005 | Mayo clinic<br>proceedings. 2005;<br>80(9):1119-1121                                     | non pertinent |
| 7296 | Fiala et al.,      | 2005 | Human<br>reproduction<br>(Oxford, England).<br>2005; 20(11):3072-3077                    | non pertinent |
| 7297 | Faulhaber et al.,  | 2005 | International j of<br>clinical<br>pharmacology and<br>therapeutics.<br>2005; 43(2):63-70 | non pertinent |
| 7298 | Fabian et al.,     | 2005 | Surgical<br>infections. 2005;<br>6(3):269-282                                            | non pertinent |
| 7299 | Ezzet et al.,      | 2005 | Clinical<br>pharmacokinetics.<br>2005; 44(2):211-220                                     | non pertinent |
| 7300 | Euctr, S.E.        | 2005 | EU Clinical Trials<br>Register. 2005                                                     | non pertinent |
| 7301 | Esen et al.,       | 2005 | J of oral and<br>maxillofacial<br>surgery. 2005;<br>63(4):457-463                        | non pertinent |
| 7302 | Engeler et al.,    | 2005 | J of urology. 2005;<br>174(3):933-936                                                    | non pertinent |
| 7303 | El-Agroudy et al., | 2005 | Kidney<br>international.<br>2005; 67(5):2039-2045                                        | non pertinent |
| 7304 | Egeli et al.,      | 2005 | International j of<br>pediatric<br>otorhinolaryngology. 2005;<br>69(6):811-815           | non pertinent |
| 7305 | Duda et al.,       | 2005 | J of vascular and<br>interventional<br>radiology : JVIR.<br>2005; 16(3):331-338          | non pertinent |
| 7306 | Dubey et al.,      | 2005 | Anesthesia and<br>Analgesia. 2005;<br>101(4):1060-1062                                   | non pertinent |
| 7307 | Donofrio et al.,   | 2005 | Clinical<br>therapeutics.<br>2005; 27(9):1420-1431                                       | non pertinent |
| 7308 | Dogra et al.,      | 2005 | European j of pain<br>(London,<br>England). 2005;<br>9(5):543-554                        | non pertinent |
| 7309 | Dodick et al.,     | 2005 | Headache. 2005;<br>45(4):315-324                                                         | non pertinent |
| 7310 | Dodick et al.,     | 2005 | CNS Drugs. 2005;<br>19(2):125-136                                                        | non pertinent |



|      |                       |      |                                                                         |               |
|------|-----------------------|------|-------------------------------------------------------------------------|---------------|
| 7311 | Dobrydnjov et al.,    | 2005 | Acta<br>anaesthesiologica<br>Scandinavica.<br>2005; 49(4):538-<br>545   | non pertinent |
| 7312 | Diener et al.,        | 2005 | Cephalalgia. 2005;<br>25(11):1031-1041                                  | non pertinent |
| 7313 | Diener et al.,        | 2005 | Cephalalgia. 2005;<br>25(10):776-787                                    | non pertinent |
| 7314 | Diener                | 2005 | Current medical<br>research and<br>opinion. 2005;<br>21(10):1603-1610   | non pertinent |
| 7315 | Di Paolo et al.,      | 2005 | International j of<br>artificial organs.<br>2005; 28(10):1039-<br>1050  | non pertinent |
| 7316 | Di Blasi et al.,      | 2005 | BMC health<br>services research.<br>2005; 5                             | non pertinent |
| 7317 | Delaunay et al.,      | 2005 | Regional<br>anesthesia and<br>pain medicine.<br>2005; 30(2):117-<br>122 | non pertinent |
| 7318 | deCharms et al.,      | 2005 | Proc Natl Acad<br>Sci U S A. 2005;<br>102(51):18626-<br>18631           | non pertinent |
| 7319 | De Tommaso et<br>al., | 2005 | Neurologica<br>sciences. 2005; 26<br>Suppl 2:152-154                    | non pertinent |
| 7320 | De Tommaso et<br>al., | 2005 | Neurosci Lett.<br>2005; 384(1-<br>2):150-155                            | non pertinent |
| 7321 | Danfors et al.,       | 2005 | J of clinical<br>psychopharmacol<br>ogy. 2005;<br>25(5):485-489         | non pertinent |
| 7322 | Dahlöf et al.,        | 2005 | Lancet (london,<br>england). 2005;<br>366(9489):895-<br>906             | non pertinent |
| 7323 | D'Angelo et al.,      | 2005 | European j of<br>anaesthesiology.<br>2005; 22(10):774-<br>779           | non pertinent |
| 7324 | Cowan et al.,         | 2005 | Pain medicine<br>(Malden, Mass).<br>2005; 6(2):113-<br>121              | non pertinent |
| 7325 | Corbett et al.,       | 2005 | Critical care<br>medicine. 2005;<br>33(5):940-945                       | non pertinent |
| 7326 | Cools et al.,         | 2005 | Psychopharmacol<br>ogy (Berl). 2005;<br>180(4):670-679                  | non pertinent |
| 7327 | Colonna et al.,       | 2005 | Current medical<br>research and<br>opinion. 2005;<br>21(10):1659-1668   | non pertinent |

|      |                  |      |                                                                        |               |
|------|------------------|------|------------------------------------------------------------------------|---------------|
| 7328 | Cohen et al.,    | 2005 | Diseases of the colon and rectum. 2005; 48(6):1130-1139                | non pertinent |
| 7329 | Cohen et al.,    | 2005 | Current medical research and opinion. 2005; 21(10):1683-1692           | non pertinent |
| 7330 | Ciraulo et al.,  | 2005 | Addiction (Abingdon, England). 2005; 100 Suppl 1:12-22                 | non pertinent |
| 7331 | Chwalisz et al., | 2005 | Human reproduction (Oxford, England). 2005; 20(4):1090-1099            | non pertinent |
| 7332 | Childers et al., | 2005 | Current medical research and opinion. 2005; 21(9):1485-1493            | non pertinent |
| 7333 | Chia et al.,     | 2005 | Acta anaesthesiologica Scandinavica. 2005; 49(6):865-869               | non pertinent |
| 7334 | Cheng et al.,    | 2005 | J of the chinese medical association : JCMS. 2005; 68(7):307-314       | non pertinent |
| 7335 | Chen et al.,     | 2005 | J of endourology / Endourological Society. 2005; 19(2):163-166         | non pertinent |
| 7336 | Chen et al.,     | 2005 | Acta anaesthesiologic Sandinavica. 2005; 49(4):546-551                 | non pertinent |
| 7337 | Chang et al.,    | 2005 | American j of gastroenterology. 2005; 100(1):115-123                   | non pertinent |
| 7338 | Chan et al.,     | 2005 | Human reproduction (Oxford, England). 2005; 20(3):829-833              | non pertinent |
| 7339 | Celik et al.,    | 2005 | J of cardiothoracic and vascular anesthesia. 2005; 19(1):67-70         | non pertinent |
| 7340 | Ceballos et al., | 2005 | International j of clinical pharmacology research. 2005; 25(4):175-186 | non pertinent |
| 7341 | Catelin et al.,  | 2005 | J Pain. 2005; 6(12):791-797                                            | non pertinent |
| 7342 | Cassar et al.,   | 2005 | British j of surgery. 2005; 92(2):159-165                              | non pertinent |

|      |                        |      |                                                                                                    |               |
|------|------------------------|------|----------------------------------------------------------------------------------------------------|---------------|
| 7343 | Carretie et al.,       | 2005 | Neuroimage. 2005; 24(3):615-623                                                                    | non pertinent |
| 7344 | Calvet et al.,         | 2005 | American j of gastroenterology. 2005; 100(8):1696-1701                                             | non pertinent |
| 7345 | Cakir et al.,          | 2005 | Contraception. 2005; 71(5):337-342                                                                 | non pertinent |
| 7346 | Bulach et al.,         | 2005 | Br J Anaesth. 2005; 94(3):300-305                                                                  | non pertinent |
| 7347 | Bryant et al.,         | 2005 | Biol Psychiatry. 2005; 58(2):111-118                                                               | non pertinent |
| 7348 | Brooks et al.,         | 2005 | British j of sports medicine. 2005; 39(2):75-79                                                    | non pertinent |
| 7349 | Brooks et al.,         | 2005 | Neuroimage. 2005; 27(1):201-209                                                                    | non pertinent |
| 7350 | Bretthauer et al.,     | 2005 | Endoscopy. 2005; 37(8):706-709                                                                     | non pertinent |
| 7351 | Brefel-Courbon et al., | 2005 | Mov Disord. 2005; 20(12):1557-1563                                                                 | non pertinent |
| 7352 | Brannan et al.,        | 2005 | J of psychiatric research. 2005; 39(1):43-53                                                       | non pertinent |
| 7353 | Brandt et al.,         | 2005 | American j of gastroenterology. 2005; 100(SUPPL 1):5-22                                            | non pertinent |
| 7354 | Brandt et al.,         | 2005 | Arthritis and rheumatism. 2005; 52(7):2015-                                                        | non pertinent |
| 7355 | Bradwejn et al.,       | 2005 | British j of psychiatry. 2005; 187:352-359                                                         | non pertinent |
| 7356 | Bradley et al.,        | 2005 | J of rheumatology. 2005; 32(3):417-423                                                             | non pertinent |
| 7357 | Bjorkholm et al.,      | 2005 | Haematologica. 2005; 90(4):505-515                                                                 | non pertinent |
| 7358 | Bezerra et al.,        | 2005 | Arthritis and rheumatism. 2005; 52(10):3073-                                                       | non pertinent |
| 7359 | Bentley et al.,        | 2005 | AANA j. 2005; 73(6):427-436                                                                        | non pertinent |
| 7360 | Belza et al.,          | 2005 | European j of clinical nutrition. 2005; 59(6):733-741                                              | non pertinent |
| 7361 | Belani et al.,         | 2005 | Annals of oncology: official j of the european society for medical oncology. 2005; 16(7):1069-1075 | non pertinent |
| 7362 | Bekkering et al.,      | 2005 | Physical therapy. 2005; 85(6):544-555                                                              | non pertinent |

|      |                               |      |                                                                       |               |
|------|-------------------------------|------|-----------------------------------------------------------------------|---------------|
| 7363 | Becker et al.,                | 2005 | Academic<br>emergency<br>medicine. 2005;<br>12(4):289-295             | non pertinent |
| 7364 | Beale et al.,                 | 2005 | British j of<br>anaesthesia. 2005;<br>95(4):500-503                   | non pertinent |
| 7365 | Baughman et al.,              | 2005 | J Clin Monit<br>Comput. 2005;<br>19(3):201-205                        | non pertinent |
| 7366 | Banaszkiewicz et<br>al.,      | 2005 | J of pediatrics.<br>2005; 146(3):364-<br>369                          | non pertinent |
| 7367 | Bailey et al.,                | 2005 | Depress anxiety.<br>2005; 21(1):18-25                                 | non pertinent |
| 7368 | Bailey et al.,                | 2005 | Clinical<br>therapeutics.<br>2005; 27(10):1548-<br>1561               | non pertinent |
| 7369 | Bahrami et al.,               | 2005 | American j of<br>gastroenterology.<br>2005; 100(4):856-<br>861        | non pertinent |
| 7370 | Baguley et al.,               | 2005 | Otology &<br>neurotology. 2005;<br>26(2):169-176                      | non pertinent |
| 7371 | Bachmann-<br>Mennenga et al., | 2005 | Acta<br>anaesthesiologica<br>Scandinavica.<br>2005; 49(4):532-<br>537 | non pertinent |
| 7372 | Avidan et al.,                | 2005 | Anesthesiology.<br>2005; 102(2):276-<br>284                           | non pertinent |
| 7373 | Atli et al.,                  | 2005 | Pain medicine<br>(Malden, Mass.).<br>2005; 6(3):225-<br>234           | non pertinent |
| 7374 | Atassi et al.,                | 2005 | Chest. 2005;<br>128(2):863-868                                        | non pertinent |
| 7375 | Astruc et al.,                | 2005 | British j of clinical<br>pharmacology.<br>2005; 59(4):405-<br>414     | non pertinent |
| 7376 | Arguedas et al.,              | 2005 | Pediatric<br>infectious disease<br>j. 2005; 24(2):153-<br>161         | non pertinent |
| 7377 | Aragona et al.,               | 2005 | European j of pain<br>(London,<br>England). 2005;<br>9(1):33-38       | non pertinent |
| 7378 | Antmen et al.,                | 2005 | Paediatric<br>anaesthesia. 2005;<br>15(3):214-219                     | non pertinent |
| 7379 | Amrhein et al.,               | 2005 | J Anxiety Disord.<br>2005; 19(2):177-<br>191                          | non pertinent |
| 7380 | Alpers et al.,                | 2005 | Int J<br>Psychophysiol.<br>2005; 57(1):25-32                          | non pertinent |
| 7381 | Alobid et al.,                | 2005 | Allergy. 2005;<br>60(4):452-458                                       | non pertinent |

|      |                    |      |                                                                                        |               |
|------|--------------------|------|----------------------------------------------------------------------------------------|---------------|
| 7382 | Al-Azzawi et al.,  | 2005 | Menopause (New York, N.Y.). 2005; 12(3):331-339                                        | non pertinent |
| 7383 | Akin et al.,       | 2005 | J of clinical anesthesia. 2005; 17(3):187-190                                          | non pertinent |
| 7384 | Agarwal et al.,    | 2005 | Anaesthesia. 2005; 60(10):978-981                                                      | non pertinent |
| 7385 | Abikoff et al.,    | 2005 | J of the American Academy of Child and Adolescent Psychiatry. 2005; 44(5):418-427      | non pertinent |
| 7386 | Yunus et al.,      | 2004 | Arthritis Rheum. 2004; 51(4):513-518                                                   | non pertinent |
| 7387 | Yoshitani et al.,  | 2004 | Anesth Analg. 2004; 98(2):471-476                                                      | non pertinent |
| 7388 | Yang et al.,       | 2004 | J of the chinese medical association : JCMA. 2004; 67(7):336-343                       | non pertinent |
| 7389 | Wirth et al.,      | 2004 | J of urology. 2004; 172(5 Pt 1):1865-1870                                              | non pertinent |
| 7390 | Williams et al.,   | 2004 | Brain Res Cogn Brain Res. 2004; 21(1):114-123                                          | non pertinent |
| 7391 | Wigal et al.,      | 2004 | J of the American Academy of Child and Adolescent Psychiatry. 2004; 43(11):1406-1414   | non pertinent |
| 7392 | Weninger et al.,   | 2004 | Anesthesiologie, Intensivmedizin, Notfallmedizin, Schmerztherapie. 2004; 39(4):212-219 | non pertinent |
| 7393 | Wasner et al.,     | 2004 | Brain. 2004; 127(Pt 5):1159-1171                                                       | non pertinent |
| 7394 | Wade et al.,       | 2004 | Multiple sclerosis (houndmills, basingstoke, england). 2004; 10(4):434-441             | non pertinent |
| 7395 | Vitton et al.,     | 2004 | Human psychopharmacology. 2004; 19 Suppl 1:27-35                                       | non pertinent |
| 7396 | Veselis et al.,    | 2004 | Anesthesiology. 2004; 101(4):831-841                                                   | non pertinent |
| 7397 | Verstappen et al., | 2004 | Annals of family medicine. 2004; 2(6):569-575                                          | non pertinent |

|      |                    |      |                                                                                       |               |
|------|--------------------|------|---------------------------------------------------------------------------------------|---------------|
| 7398 | Verri et al.,      | 2004 | Revista portuguesa de cardiologia (Portuguese j of cardiology). 2004; 23(9):1089-1105 | non pertinent |
| 7399 | Velikova et al.,   | 2004 | J Clin Oncol. 2004; 22(4):714-724                                                     | non pertinent |
| 7400 | Van Duinen et al., | 2004 | Neuro Endocrinol Lett. 2004; 25(5):386-390                                            | non pertinent |
| 7401 | Usichenko et al.,  | 2004 | Anesth Analg. 2004; 98(2):343-345                                                     | non pertinent |
| 7402 | Tursi et al.,      | 2004 | Medical science monitor. 2004; 10(11):P126-131                                        | non pertinent |
| 7403 | Tsuchiya et al.,   | 2004 | Chinese j of digestive diseases. 2004; 5(4):169-174                                   | non pertinent |
| 7404 | Tomikawa et al.,   | 2004 | J of gastroenterology and hepatology. 2004; 19(5):576-581                             | non pertinent |
| 7405 | Thimineur et al.,  | 2004 | Pain. 2004; 109(3):242-249                                                            | non pertinent |
| 7406 | Thébault et al.,   | 2004 | Pharmacotherapy . 2004; 24(10):1295-1305                                              | non pertinent |
| 7407 | Tarantino et al.,  | 2004 | Haemophilia. 2004; 10(5):428-437                                                      | non pertinent |
| 7408 | Tamir et al.,      | 2004 | J Spinal Disord Tech. 2004; 17(6):467-469                                             | non pertinent |
| 7409 | Talaie et al.,     | 2004 | Clinical and experimental pharmacology & physiology. 2004; 31(11):777-782             | non pertinent |
| 7410 | Taiji              | 2004 | Folia pharmacologica japonica. 2004; 124(3):171-179                                   | non pertinent |
| 7411 | Tabak et al.,      | 2004 | J of rheumatology and medical rehabilitation. 2004; 15(4):234-240                     | non pertinent |
| 7412 | Szeimies et al.,   | 2004 | J of the American Academy of Dermatology. 2004; 51(4):547-555                         | non pertinent |
| 7413 | Storro et al.,     | 2004 | J of rehabilitation medicine. 2004; 36(1):12-16                                       | non pertinent |
| 7414 | Stein et al.,      | 2004 | American heart j. 2004; 147(4):E18                                                    | non pertinent |

|      |                            |      |                                                                          |               |
|------|----------------------------|------|--------------------------------------------------------------------------|---------------|
| 7415 | Staretz et al.,            | 2004 | J of<br>periodontology.<br>2004; 75(10):1319-<br>1326                    | non pertinent |
| 7416 | Song et al.,               | 2004 | Anesthesiology.<br>2004; 100(5):1072-<br>1075                            | non pertinent |
| 7417 | Song et al.,               | 2004 | Anesth Analg.<br>2004; 98(3):687-<br>691                                 | non pertinent |
| 7418 | Skoumal et al.,            | 2004 | European urology.<br>2004; 46(3):362-<br>369                             | non pertinent |
| 7419 | Sinatra et al.,            | 2004 | Anesth Analg.<br>2004; 98(1):135-<br>140                                 | non pertinent |
| 7420 | Simon et al.,              | 2004 | J of psychiatric<br>research. 2004;<br>38(5):491-495                     | non pertinent |
| 7421 | Shanahan et al.,           | 2004 | Ann Rheum Dis.<br>2004; 63(9):1035-<br>1040                              | non pertinent |
| 7422 | Schlünzen et al.,          | 2004 | Acta<br>anaesthesiologica<br>Scandinavica.<br>2004; 48(10):1268-<br>1276 | non pertinent |
| 7423 | Sauer et al.,              | 2004 | Reproductive<br>biomedicine<br>online. 2004;<br>9(5):487-493             | non pertinent |
| 7424 | Sanchez et al.,            | 2004 | American j of<br>obstetrics and<br>gynecology. 2004;<br>191(6):1898-1906 | non pertinent |
| 7425 | Ruxrungtham et<br>al.,     | 2004 | J of clinical<br>pharmacology.<br>2004; 44(7):793-<br>802                | non pertinent |
| 7426 | Ruf et al.,                | 2004 | Infection. 2004;<br>32(4):191-198                                        | non pertinent |
| 7427 | Roitberg et al.,           | 2004 | Surgical<br>neurology. 2004;<br>61(2):106-108                            | non pertinent |
| 7428 | Rogers et al.,             | 2004 | Anesthesiology.<br>2004; 100(2):292-<br>301                              | non pertinent |
| 7429 | Rodriguez-Rubio<br>et al., | 2004 | Scandinavian j of<br>urology and<br>nephrology. 2004;<br>38(6):477-480   | non pertinent |
| 7430 | Roberts et al.,            | 2004 | Cogn Affect Behav<br>Neurosci. 2004;<br>4(3):307-316                     | non pertinent |
| 7431 | Rickels et al.,            | 2004 | J of clinical<br>psychopharmacol<br>ogy. 2004;<br>24(5):488-496          | non pertinent |
| 7432 | Ribeiro et al.,            | 2004 | J of pain and<br>symptom<br>management.<br>2004; 27(5):434-<br>439       | non pertinent |

|      |                                                              |      |                                                               |               |
|------|--------------------------------------------------------------|------|---------------------------------------------------------------|---------------|
| 7433 | Rhame et al.,                                                | 2004 | Antimicrobial agents and chemotherapy. 2004; 48(11):4200-4208 | non pertinent |
| 7434 | Reines et al.,                                               | 2004 | Neurology. 2004; 62(1):66-71                                  | non pertinent |
| 7435 | Rasmussen et al.,                                            | 2004 | Eur J Neurol. 2004; 11(8):545-553                             | non pertinent |
| 7436 | Raij et al.,                                                 | 2004 | Neuroimage. 2004; 23(2):569-573                               | non pertinent |
| 7437 | Quante et al.,                                               | 2004 | Arzneimittelforschung. 2004; 54(3):143-151                    | non pertinent |
| 7438 | Pradalier et al.,                                            | 2004 | CNS Drugs. 2004; 18(15):1149-1163                             | non pertinent |
| 7439 | Pourtois et al.,                                             | 2004 | Cereb Cortex. 2004; 14(6):619-633                             | non pertinent |
| 7440 | Pinnington et al.,                                           | 2004 | Family practice. 2004; 21(4):372-380                          | non pertinent |
| 7441 | Pickering et al.,                                            | 2004 | American j of hypertension. 2004; 17(12 Pt 1):1135-1142       | non pertinent |
| 7442 | Petrakis et al.,                                             | 2004 | Psychopharmacology. 2004; 172(3):291-297                      | non pertinent |
| 7443 | Peloso et al.,                                               | 2004 | J of rheumatology. 2004; 31(12):2454-2463                     | non pertinent |
| 7444 | Pekindil et al.,                                             | 2004 | Nuclear medicine communications. 2004; 25(1):29-37            | non pertinent |
| 7445 | Paul et al.,                                                 | 2004 | Clinical therapeutics. 2004; 26(9):1508-1514                  | non pertinent |
| 7446 | Pande et al.,                                                | 2004 | J Clin Psychopharmacol. 2004; 24(2):141-149                   | non pertinent |
| 7447 | Olander et al.,                                              | 2004 | Clinical therapeutics. 2004; 26(10):1619-1629                 | non pertinent |
| 7448 | Ohara et al.,                                                | 2004 | Clin Neurophysiol. 2004; 115(7):1641-1652                     | non pertinent |
| 7449 | Nct – National Institute of Dental and Craniofacial Research | 2004 | National Library of Medicine. 2004                            | non pertinent |
| 7450 | Narayan et al.,                                              | 2004 | Oncol Rep. 2004; 11(1):97-103                                 | non pertinent |
| 7451 | Myles et al.,                                                | 2004 | Lancet. 2004; 363(9423):1757-1763                             | non pertinent |
| 7452 | Morris et al.,                                               | 2004 | Neuroimage. 2004; 22(1):372-380                               | non pertinent |



|      |                          |      |                                                                     |               |
|------|--------------------------|------|---------------------------------------------------------------------|---------------|
| 7453 | Moretti et al.,          | 2004 | Drugs under experimental and clinical research. 2004; 30(4):143-152 | non pertinent |
| 7454 | Mohammadi et al.,        | 2004 | J of child and adolescent psychopharmacology. 2004; 14(3):418-425   | non pertinent |
| 7455 | Miceli-Richard et al.,   | 2004 | Annals of the rheumatic diseases. 2004; 63(8):923-930               | non pertinent |
| 7456 | Mencke et al.,           | 2004 | Acta anaesthesiologica Scandinavica. 2004; 48(10):1245-1248         | non pertinent |
| 7457 | Meissner et al.,         | 2004 | Anesth Analg. 2004; 98(1):141-147                                   | non pertinent |
| 7458 | Medina-Santillan et al., | 2004 | Proceedings of the western pharmacology society. 2004; 47:109-112   | non pertinent |
| 7459 | McDonald et al.,         | 2004 | West J Nurs Res. 2004; 26(8):836-852                                | non pertinent |
| 7460 | Mathews et al.,          | 2004 | J Cogn Neurosci. 2004; 16(10):11683-1694                            | non pertinent |
| 7461 | Malmgren et al.,         | 2004 | Acta anaesthesiologica Scandinavica. 2004; 48(10):1277-1282         | non pertinent |
| 7462 | Lossignol et al.,        | 2004 | Revue medicale de bruxelles. 2004; 25(5):429-435                    | non pertinent |
| 7463 | Lonial et al.,           | 2004 | Biology of blood and marrow transplantation. 2004; 10(12):848-857   | non pertinent |
| 7464 | Linde et al.,            | 2004 | Cephalalgia. 2004; 24(12):1057-1066                                 | non pertinent |
| 7465 | Lee et al.,              | 2004 | Clinical breast cancer. 2004; 5(5):371-376                          | non pertinent |
| 7466 | Lee et al.,              | 2004 | J of periodontology. 2004; 75(11):1500-1508                         | non pertinent |
| 7467 | Launo et al.,            | 2004 | Minerva Anesthesiologica. 2004; 70(10):727-734                      | non pertinent |
| 7468 | Larijani et al.,         | 2004 | Pharmacotherapy . 2004; 24(12):1675-1680                            | non pertinent |

|      |                        |      |                                                                        |               |
|------|------------------------|------|------------------------------------------------------------------------|---------------|
| 7469 | Landis et al.,         | 2004 | Brain Behav Immun. 2004; 18(4):304-313                                 | non pertinent |
| 7470 | Kullenberg et al.,     | 2004 | J of rheumatology. 2004; 31(11):2265-2268                              | non pertinent |
| 7471 | Kranzler et al.,       | 2004 | Alcoholism, clinical and experimental research. 2004; 28(7):1051-1059  | non pertinent |
| 7472 | Korn et al.,           | 2004 | Arthritis and rheumatism. 2004; 50(12):3985-                           | non pertinent |
| 7473 | Kohno et al.,          | 2004 | J of Clinical Oncology. 2005; 23(15):3314-21                           | non pertinent |
| 7474 | Koeppe et al.,         | 2004 | Scand J Rheumatol Suppl. 2004; 119:24-27                               | non pertinent |
| 7475 | Knight et al.,         | 2004 | Cogn Affect Behav Neurosci. 2004; 4(3):317-325                         | non pertinent |
| 7476 | Klapper et al.,        | 2004 | Cephalalgia. 2004; 24(11):918-924                                      | non pertinent |
| 7477 | Kiss et al.,           | 2004 | Neurosurg Focus. 2004; 17(1):E5                                        | non pertinent |
| 7478 | Killeen et al.,        | 2004 | Alcoholism, clinical and experimental research. 2004; 28(11):1710-1717 | non pertinent |
| 7479 | Khullar et al.,        | 2004 | Urology. 2004; 64(2):269-274                                           | non pertinent |
| 7480 | Khan et al.,           | 2004 | Psychoneuroendocrinology. 2004; 29(9):1163-1171                        | non pertinent |
| 7481 | Kemp et al.,           | 2004 | Neuroimage. 2004; 22(3):1084-1096                                      | non pertinent |
| 7482 | Kapetanopoulos et al., | 2004 | J of nuclear cardiology. 2004; 11(5):570-577                           | non pertinent |
| 7483 | Jones et al.,          | 2004 | Worldviews Evid Based Nurs. 2004; 1 Suppl 1:13-20                      | non pertinent |
| 7484 | Jayaraman et al.,      | 2004 | Eur J Appl Physiol. 2004; 93(1-2):30-38                                | non pertinent |
| 7485 | Jaju et al.,           | 2004 | Indian j Physiol Pharmacol. 2004; 48(1):31-40                          | non pertinent |
| 7486 | Iversen et al.,        | 2004 | J of urology. 2004; 172(5 Pt 1):1871-1876                              | non pertinent |
| 7487 | Hurley et al.,         | 2004 | Spine (Phila Pa 1976). 2004; 29(20):2207-2216                          | non pertinent |
| 7488 | Horak et al.,          | 2004 | Arzneimittel-forschung. 2004; 54(10):666-672                           | non pertinent |

|      |                   |      |                                                                                      |               |
|------|-------------------|------|--------------------------------------------------------------------------------------|---------------|
| 7489 | Hopkins et al.,   | 2004 | Clinical infectious diseases. 2004; 39(6):759-766                                    | non pertinent |
| 7490 | Hoffman et al.,   | 2004 | Neuroreport. 2004; 15(8):1245-1248                                                   | non pertinent |
| 7491 | Hofbauer et al.,  | 2004 | Anesthesiology. 2004; 100(2):386-394                                                 | non pertinent |
| 7492 | Haid et al.,      | 2004 | Spine J. 2004; 4(5):527-538                                                          | non pertinent |
| 7493 | Hackner et al.,   | 2004 | British j of anaesthesia. 2004; 91(4):580-582                                        | non pertinent |
| 7494 | Haas et al.,      | 2004 | Headache. 2004; 44(10):1029-1037                                                     | non pertinent |
| 7495 | Guyer et al.,     | 2004 | Spine j. 2004; 4(6 Suppl):252-259                                                    | non pertinent |
| 7496 | Guler et al.,     | 2004 | J canadien d'anesthesie (Canadian j of anaesthesia). 2004; 51(7):718-722             | non pertinent |
| 7497 | Greco et al.,     | 2004 | J of General Internal Medicine. 2004; 19(8):813-818                                  | non pertinent |
| 7498 | Grange et al.,    | 2004 | J of rehabilitation research and development. 2004; 41(4):611-620                    | non pertinent |
| 7499 | Goldstein et al., | 2004 | Clinical therapeutics. 2004; 26(10):1637-1643                                        | non pertinent |
| 7500 | Girard et al.,    | 2004 | Anesth Analg. 2004; 99(2):573-577                                                    | non pertinent |
| 7501 | Ginsberg          | 2004 | Primary psychiatry. 2004; 11(10):27-28                                               | non pertinent |
| 7502 | Geller et al.,    | 2004 | J of the American Academy of Child and Adolescent Psychiatry. 2004; 43(11):1387-1396 | non pertinent |
| 7503 | Gattaz et al.,    | 2004 | Pharmacopsychiatry. 2004; 37(6):279-285                                              | non pertinent |
| 7504 | Fritzer et al.,   | 2004 | J Clin Neurophysiol. 2004; 21(2):99-104                                              | non pertinent |
| 7505 | Fischer et al.,   | 2004 | Cogn Affect Behav Neurosci. 2004; 4(3):326-334                                       | non pertinent |
| 7506 | Finn et al.,      | 2004 | Clinical nephrology. 2004; 62(3):193-201                                             | non pertinent |
| 7507 | Farkas et al.,    | 2004 | Magy Seb. 2004; 57(5):279-282                                                        | non pertinent |

|      |                     |      |                                                                                      |               |
|------|---------------------|------|--------------------------------------------------------------------------------------|---------------|
| 7508 | Ericsson et al.,    | 2004 | Drug metabolism and disposition. 2004; 32(9):923-929                                 | non pertinent |
| 7509 | Erasmus et al.,     | 2004 | Asian j of surgery / Asian Surgical Association. 2004; 27(3):227-235                 | non pertinent |
| 7510 | Epstein et al.,     | 2004 | Vaccine. 2004; 22(13-14):1592-1603                                                   | non pertinent |
| 7511 | Emslie et al.,      | 2004 | J of the American Academy of Child and Adolescent Psychiatry. 2004; 43(11):1397-1405 | non pertinent |
| 7512 | Egeli et al.,       | 2004 | International j of pediatric otorhinolaryngology. 2004; 68(8):1047-1051              | non pertinent |
| 7513 | Drouin et al.,      | 2004 | Diabetes, obesity & metabolism. 2004; 6(6):414-421                                   | non pertinent |
| 7514 | Dowman              | 2004 | Psychophysiology. 2004; 41(4):613-624                                                | non pertinent |
| 7515 | Dowman              | 2004 | Psychophysiology. 2004; 41(5):749-761                                                | non pertinent |
| 7516 | Dionne et al.,      | 2004 | J of clinical pharmacology. 2004; 44(12):1418-1424                                   | non pertinent |
| 7517 | Diego et al.,       | 2004 | Int J Neurosci. 2004; 114(1):31-44                                                   | non pertinent |
| 7518 | Di Lorenzo et al.,  | 2004 | Gastroenterology. 2004; 126(1):33-40                                                 | non pertinent |
| 7519 | Derosa et al.,      | 2004 | Diabetes, nutrition & metabolism. 2004; 17(4):222-229                                | non pertinent |
| 7520 | De Oliveira et al., | 2004 | Pain. 2004; 110(1-2):400-408                                                         | non pertinent |
| 7521 | D'Souza et al.,     | 2004 | Neuropsychopharmacology. 2004; 29(8):1558-1572                                       | non pertinent |
| 7522 | Croxatto et al.,    | 2004 | Contraception. 2004; 70(6):442-450                                                   | non pertinent |
| 7523 | Crippa et al.,      | 2004 | Neuropsychopharmacology. 2004; 29(2):417-426                                         | non pertinent |
| 7524 | Cicek et al.,       | 2004 | Emergency medicine j. 2004; 21(3):323-326                                            | non pertinent |
| 7525 | Carter et al.,      | 2004 | J of rheumatology. 2004; 31(10):1973-1980                                            | non pertinent |
| 7526 | Carragee et al.,    | 2004 | Spine (Phila Pa 1976). 2004; 29(10):1112-1117                                        | non pertinent |

|      |                       |      |                                                                       |               |
|------|-----------------------|------|-----------------------------------------------------------------------|---------------|
| 7527 | Candell Riera et al., | 2004 | Mapfre medicina. 2004; 15(2):134-140                                  | non pertinent |
| 7528 | Bulut et al.,         | 2004 | Clinical neurology and neurosurgery. 2004; 107(1):44-48               | non pertinent |
| 7529 | Buffum et al.,        | 2004 | J of the American Geriatrics Society. 2004; 52(7):1093-1097           | non pertinent |
| 7530 | Buchbinder et al.,    | 2004 | Ann Rheum Dis. 2004; 63(3):302-309                                    | non pertinent |
| 7531 | Bronfort et al.,      | 2004 | J of manipulative and physiological therapeutics. 2004; 27(8):503-508 | non pertinent |
| 7532 | Brighina et al.,      | 2004 | J of the neurological sciences. 2004; 227(1):67-71                    | non pertinent |
| 7533 | Boss et al.,          | 2004 | J of shoulder and elbow surgery. 2004; 13(6):630-634                  | non pertinent |
| 7534 | Bookman et al.,       | 2004 | CMAJ; Canadian Medical Association J. 2004; 171(4):333-338            | non pertinent |
| 7535 | Boffito et al.,       | 2004 | Antiviral therapy. 2004; 9(3):423-429                                 | non pertinent |
| 7536 | Bischoff et al.,      | 2004 | J of neurology. 2004; 251(2):219-221                                  | non pertinent |
| 7537 | Bergendahl et al.,    | 2004 | Acta anaesthesiologica Scandinavica. 2004; 48(10):1292-1300           | non pertinent |
| 7538 | Ben-Chetrit et al.,   | 2004 | Human reproduction (Oxford, England). 2004; 19(10):2372-2376          | non pertinent |
| 7539 | Bell et al.,          | 2004 | J Altern Complement Med. 2004; 10(2):285-299                          | non pertinent |
| 7540 | Bell et al.,          | 2004 | International j of neuroscience. 2004; 114(9):1195-1220               | non pertinent |
| 7541 | Beek et al.,          | 2004 | J Thorac Cardiovasc Surg. 2004; 127(2):517-524                        | non pertinent |
| 7542 | Barbanoj et al.,      | 2004 | Neuropsychobiology. 2004; 50(4):311-321                               | non pertinent |

|      |                       |      |                                                                                                     |               |
|------|-----------------------|------|-----------------------------------------------------------------------------------------------------|---------------|
| 7543 | Bajaj et al.,         | 2004 | J of the indian medical association. 2004; 102(5):272, 274, 276-278                                 | non pertinent |
| 7544 | Arnold et al.,        | 2004 | J of child and adolescent psychopharmacology. 2004; 14(4):542-554                                   | non pertinent |
| 7545 | Akcam                 | 2004 | Pediatrics international. 2004; 46(4):459-462                                                       | non pertinent |
| 7546 | Aguirre-Garay et al., | 2004 | Clinical and experimental pharmacology & physiology. 2004; 31(7):462-465                            | non pertinent |
| 7547 | Agruss et al.,        | 2004 | Ergonomics. 2004; 47(10):1103-1115                                                                  | non pertinent |
| 7548 | Agarwala et al.,      | 2004 | Melanoma research. 2004; 14(3):217-222                                                              | non pertinent |
| 7549 | Abratt et al.,        | 2004 | Annals of oncology: official j of the european society for medical oncology. 2004; 15(11):1613-1621 | non pertinent |
| 7550 | Zwanzger et al.,      | 2003 | Neuropsychopharmacology. 2003; 28(5):979-984                                                        | non pertinent |
| 7551 | Zhang et al.,         | 2003 | Brain Res. 2003; 982(2):168-178                                                                     | non pertinent |
| 7552 | Zhang et al.,         | 2003 | Magn Reson Med. 2003; 50(1):50-58                                                                   | non pertinent |
| 7553 | Yetgin et al.,        | 2003 | Leukemia. 2003; 17(2):328-333                                                                       | non pertinent |
| 7554 | Yanagihara et al.,    | 2003 | Biopharmaceutics & drug disposition. 2003; 24(1):37-43                                              | non pertinent |
| 7555 | Winston et al.,       | 2003 | Neuroimage. 2003; 20(1):84-97                                                                       | non pertinent |
| 7556 | Willumsen et al.,     | 2003 | Acta Odontol Scand. 2003; 61(2):93-99                                                               | non pertinent |
| 7557 | Weerakkody et al.,    | 2003 | Somatosens Mot Res. 2003; 20(1):27-32                                                               | non pertinent |
| 7558 | Weber et al.,         | 2003 | European j of anaesthesiology. 2003; 20(12):963-966                                                 | non pertinent |
| 7559 | Waish et al.,         | 2003 | Prostata cancer and prostatic diseases. 2003; 6(3):242-244                                          | non pertinent |

|      |                               |      |                                                                                        |               |
|------|-------------------------------|------|----------------------------------------------------------------------------------------|---------------|
| 7560 | Wade et al.,                  | 2003 | J of cardiovascular pharmacology. 2003; 41(6):908-915                                  | non pertinent |
| 7561 | Von Scheele et al.,           | 2003 | Rheumatology (oxford, england). 2003; 42 Suppl 3:iii53-59                              | non pertinent |
| 7562 | Verne et al.,                 | 2003 | Pain. 2003; 105(1-2):223-230                                                           | non pertinent |
| 7563 | Veldhuyzen van Zanten et al., | 2003 | J canadien de gastroenterologie (Canadian j of gastroenterology). 2003; 17(9):533-538  | non pertinent |
| 7564 | Van Seventer et al.,          | 2003 | Current medical research and opinion. 2003; 19(6):457-469                              | non pertinent |
| 7565 | Tuncer et al.,                | 2003 | Anestezi dergisi. 2003; 11(2):117-120                                                  | non pertinent |
| 7566 | Taylor et al.,                | 2003 | Antimicrobial agents and chemotherapy. 2003; 47(7):2199-2203                           | non pertinent |
| 7567 | Taub et al.,                  | 2003 | Physical medicine and rehabilitation clinics of North America. 2003; 14(1 SUPPL):77-91 | non pertinent |
| 7568 | Stark et al.,                 | 2003 | Int J Psychophysiol. 2003; 50(3):225-234                                               | non pertinent |
| 7569 | Smith et al.,                 | 2003 | Rheumatology. 2003; 42(12):1477-1485                                                   | non pertinent |
| 7570 | Sharp et al.,                 | 2003 | J Bone Joint Surg Br. 2003; 85(7):999-1005                                             | non pertinent |
| 7571 | Schlereth et al.,             | 2003 | Neuroimage. 2003; 20(1):441-454                                                        | non pertinent |
| 7572 | Schectman et al.,             | 2003 | J Gen Intern Med. 2003; 18(10):773-780                                                 | non pertinent |
| 7573 | Scharf et al.,                | 2003 | J Rheumatol. 2003; 30(5):1070-1074                                                     | non pertinent |
| 7574 | Sauder et al.,                | 2003 | Acta ophthalmologica Scandinavica. 2003; 81(6):596-599                                 | non pertinent |
| 7575 | Sarapa et al.,                | 2003 | J of clinical pharmacology. 2003; 43(9):974-982                                        | non pertinent |

|      |                     |      |                                                                        |               |
|------|---------------------|------|------------------------------------------------------------------------|---------------|
| 7576 | Santens et al.,     | 2003 | Acta neurologica belgica. 2003; 103(3):159-163                         | non pertinent |
| 7577 | Rugino et al.,      | 2003 | Pediatric neurology. 2003; 29(2):136-142                               | non pertinent |
| 7578 | Rubinacci et al.,   | 2003 | Menopause (New York, N.Y.). 2003 10(3):241-249                         | non pertinent |
| 7579 | Rosenwasser et al., | 2003 | J of allergy and clinical immunology. 2003; 112(3):563-570             | non pertinent |
| 7580 | Roifman et al.,     | 2003 | International immunopharmacology. 2003; 3(9):1325-1333                 | non pertinent |
| 7581 | Ristvedt et al.,    | 2003 | Am J Gastroenterol. 2003; 98(3):578-585                                | non pertinent |
| 7582 | Ringe et al.,       | 2003 | Osteoporosis international. 2003; 14(10):801-807                       | non pertinent |
| 7583 | Ricci et al.,       | 2003 | Giornale italiano di dermatologia e venereologia. 2003; 138(6):513-517 | non pertinent |
| 7584 | Remy et al.,        | 2003 | Neuroimage. 2003; 19(3):655-664                                        | non pertinent |
| 7585 | Recart et al.,      | 2003 | Anesth Analg. 2003; 96(4):1047-1050                                    | non pertinent |
| 7586 | Purkins et al.,     | 2003 | British j of clinical pharmacology. 2003; 56 Suppl 1: 62-68            | non pertinent |
| 7587 | Purkins et al.,     | 2003 | British j of clinical pharmacology. 2003; 56 Suppl 1: 10-16            | non pertinent |
| 7588 | Pollo et al.,       | 2003 | Pain. 2003; 102(1-2):125-133                                           | non pertinent |
| 7589 | Piccart et al.,     | 2003 | International j of gynecological cancer. 2003; 13 Suppl 2:196-203      | non pertinent |
| 7590 | Phelan et al.,      | 2003 | J of clinical psychiatry. 2003; 64(11):1328-1334                       | non pertinent |
| 7591 | Pfister et al.,     | 2003 | European radiology. 2003; 13(11):2513-2520                             | non pertinent |
| 7592 | Petersen et al.,    | 2003 | J of Pain. 2003; 4(7):400-406                                          | non pertinent |
| 7593 | Paksoy et al.,      | 2003 | Spine (Phila Pa 1976). 2003; 28(11):1183-1188                          | non pertinent |



|      |                                                    |      |                                                                    |               |
|------|----------------------------------------------------|------|--------------------------------------------------------------------|---------------|
| 7594 | Ostadal et al.,                                    | 2003 | Molecular and cellular biochemistry. 2003; 246(1-2):45-50          | non pertinent |
| 7595 | Oosterhof et al.,                                  | 2003 | European urology. 2003; 44(5):519-526                              | non pertinent |
| 7596 | Niederhof et al.,                                  | 2003 | Human psychopharmacology. 2003; 18(5):389-393                      | non pertinent |
| 7597 | Nemoto et al.,                                     | 2003 | Neuroreport. 2003; 14(6):791-797                                   | non pertinent |
| 7598 | Nct – Brown                                        | 2003 | National Library of Medicine. 2003                                 | non pertinent |
| 7599 | Nct – National Institute of Mental Health          | 2003 | National Library of Medicine. 2003                                 | non pertinent |
| 7600 | Nct –National Institutes of Health Clinical Center | 2003 | National Library of Medicine. 2003                                 | non pertinent |
| 7601 | Murphy et al.,                                     | 2003 | American j of cardiovascular drugs. 2003; 3(2):101-112             | non pertinent |
| 7602 | Monk et al.,                                       | 2003 | Neuroimage. 2003; 20(1):420-428                                    | non pertinent |
| 7603 | Miner et al.,                                      | 2003 | Acad Emerg Med. 2003; 10(6):638-643                                | non pertinent |
| 7604 | Miner et al.,                                      | 2003 | Academic emergency medicine. 2003; 10(9):931-937                   | non pertinent |
| 7605 | Messeri et al.,                                    | 2003 | Paediatric anaesthesia. 2003; 13(7):574-578                        | non pertinent |
| 7606 | Mendez et al.,                                     | 2003 | Clinical colorectal cancer. 2003; 3(3):174-179                     | non pertinent |
| 7607 | Meletti et al.,                                    | 2003 | Neurology. 2003; 60(3):426-431                                     | non pertinent |
| 7608 | McDonald et al.,                                   | 2003 | Res Nurs Health. 2003; 26(3):225-232                               | non pertinent |
| 7609 | McAfee et al.,                                     | 2003 | Spine (Phila Pa 1976). 2003; 28(20):153-162                        | non pertinent |
| 7610 | Mayo et al.,                                       | 2003 | Revista de la sociedad espanola del dolor. 2003; 10(7):411-418     | non pertinent |
| 7611 | Martinsson et al.,                                 | 2003 | Cerebrovascular diseases (basel, switzerland). 2003; 16(4):338-345 | non pertinent |
| 7612 | Marchand et al.,                                   | 2003 | Pain. 2003; 105(3):481-488                                         | non pertinent |

|      |                       |      |                                                                  |               |
|------|-----------------------|------|------------------------------------------------------------------|---------------|
| 7613 | Manfredi et al.,      | 2003 | International j of geriatric psychiatry. 2003; 18(8):700-705     | non pertinent |
| 7614 | Manchikanti et al.,   | 2003 | Pain Physician. 2003; 6(3):259-267                               | non pertinent |
| 7615 | Luis Bautista et al., | 2003 | Clinical therapeutics. 2003; 25(1):194-209                       | non pertinent |
| 7616 | Lorenz et al.,        | 2003 | Brain. 2003; 126(Pt 5):1079-1091                                 | non pertinent |
| 7617 | Loo et al.,           | 2003 | Encephale. 2003; 29(2):165-171                                   | non pertinent |
| 7618 | Loewen et al.,        | 2003 | Annals of plastic surgery. 2003; 51(5):472-477                   | non pertinent |
| 7619 | Lin et al.,           | 2003 | J of diabetes and its complications. 2003; 17(4):179-185         | non pertinent |
| 7620 | Legrain et al.,       | 2003 | Pain. 2003; 103(3):237-248                                       | non pertinent |
| 7621 | Langsjo et al.,       | 2003 | Anesthesiology. 2003; 99(3):614-623                              | non pertinent |
| 7622 | Kwarnström et al.,    | 2003 | Acta anaesthesiologica Scandinavica. 2003; 47(7):868-877         | non pertinent |
| 7623 | Kuiken et al.,        | 2003 | Clinical gastroenterology and hepatology. 2003; 1(3):219-228     | non pertinent |
| 7624 | Krohn et al.,         | 2003 | European j of surgery. 2003; Supplement(588): 57-61              | non pertinent |
| 7625 | Kayikcioglu et al.,   | 2003 | European heart j. 2003; 24(22):1999-2005                         | non pertinent |
| 7626 | Jellish et al.,       | 2003 | J of neurosurgical anesthesiology. 2003; 15(3):176-184           | non pertinent |
| 7627 | Ind et al.,           | 2003 | Respiratory medicine. 2003; 97(SUPPL A):9-21                     | non pertinent |
| 7628 | Holmes et al.,        | 2003 | Brain Res Cogn Brain Res. 2003; 16(2):174-184                    | non pertinent |
| 7629 | Hoffman et al.,       | 2003 | Cyberpsychol Behav. 2003; 6(2):127-131                           | non pertinent |
| 7630 | Herr et al.,          | 2003 | J of cardiothoracic and vascular anesthesia. 2003; 17(5):576-584 | non pertinent |

|      |                    |      |                                                                               |               |
|------|--------------------|------|-------------------------------------------------------------------------------|---------------|
| 7631 | Henderson et al.,  | 2003 | Australian & New Zealand j of obstetrics & gynaecology. 2003; 43(5):372-377   | non pertinent |
| 7632 | Hayamizu et al.,   | 2003 | Current therapeutic research – clinical and experimental. 2003; 64(8):551-567 | non pertinent |
| 7633 | Hawkey et al.,     | 2003 | Gut. 2003; 52(11):1537-1542                                                   | non pertinent |
| 7634 | Hanson et al.,     | 2003 | Nicotine & tobacco research. 2003; 5(4):515-526                               | non pertinent |
| 7635 | Hackner et al.,    | 2003 | Br J Anaesth. 2003; 91(4):580-582                                             | non pertinent |
| 7636 | Gutteridge et al., | 2003 | Calcified tissue international. 2003; 73(1):33-43                             | non pertinent |
| 7637 | Górecka et al.,    | 2003 | Respiration: international review of thoracic diseases. 2003; 70(3):275-283   | non pertinent |
| 7638 | Golladay et al.,   | 2003 | Pediatric endosurgery and innovative techniques. 2003; 7(2):153-159           | non pertinent |
| 7639 | Gerson et al.,     | 2003 | Clinical gastroenterology and hepatology. 2003; 1(6):446-452                  | non pertinent |
| 7640 | Frerick et al.,    | 2003 | Pain. 2003; 106(1-2):59-64                                                    | non pertinent |
| 7641 | Forestier et al.,  | 2003 | Anesthesiology. 2003; 99(2):334-346                                           | non pertinent |
| 7642 | Fitzgerald et al., | 2003 | Eur J Anaesthesiol. 2003; 20(12):952-956                                      | non pertinent |
| 7643 | Fernandez et al.,  | 2003 | Dev Behav Pediatr. 2003; 24(4):261-266                                        | non pertinent |
| 7644 | Etlin et al.,      | 2003 | Pain research & management. 2003; 8(2):107-108                                | non pertinent |
| 7645 | Duffy et al.,      | 2003 | Drugs. 2003; 63 Suppl 1:31-36                                                 | non pertinent |
| 7646 | Downar et al.,     | 2003 | Neuroimage. 2003; 20(3):1540-1551                                             | non pertinent |

|      |                     |      |                                                                                              |               |
|------|---------------------|------|----------------------------------------------------------------------------------------------|---------------|
| 7647 | Dietrich et al.,    | 2003 | American j of gastroenterology. 2003; 98(11):2491-2499                                       | non pertinent |
| 7648 | D'Amelio et al.,    | 2003 | International j of tissue reactions. 2003; 25(2):73-78                                       | non pertinent |
| 7649 | Csizy et al.,       | 2003 | J of orthopaedic trauma. 2003; 17(2):106-112                                                 | non pertinent |
| 7650 | Cross et al.,       | 2003 | Vaccine. 2003; 21(31):4576-4587                                                              | non pertinent |
| 7651 | Croom et al.,       | 2003 | Drugs. 2003; 63(5):513-522                                                                   | non pertinent |
| 7652 | Coimbra et al.,     | 2003 | Anesth Analg. 2003; 97(3):839-842                                                            | non pertinent |
| 7653 | Choi et al.,        | 2003 | Allergy: european j of allergy and clinical immunology. 2003; 58(11):1114-1116               | non pertinent |
| 7654 | Chawla et al.,      | 2003 | Therapeutic drug monitoring. 2003; 25(2):203-210                                             | non pertinent |
| 7655 | Cecchi et al.,      | 2003 | J Perinatol. 2003; 23(4):304-306                                                             | non pertinent |
| 7656 | Castro et al.,      | 2003 | Head & neck. 2003; 25(9):717-731                                                             | non pertinent |
| 7657 | Caba et al.,        | 2003 | Revista de la sociedad espanola del dolor. 2003; 10(6):341-348                               | non pertinent |
| 7658 | Buzzi et al.,       | 2003 | Cephalalgia. 2003; 23(1_suppl):1-4                                                           | non pertinent |
| 7659 | Buggy et al.,       | 2003 | Pain. 2003; 106(1-2):169-172                                                                 | non pertinent |
| 7660 | Bruhn et al.,       | 2003 | Anesthesiology. 2003; 98(3):621-627                                                          | non pertinent |
| 7661 | Bruehl et al.,      | 2003 | Pain. 2003; 106(3):317-324                                                                   | non pertinent |
| 7662 | Brotz et al.,       | 2003 | J Neurol. 2003; 250(6):746-749                                                               | non pertinent |
| 7663 | Brien et al.,       | 2003 | British j of clinical pharmacology. 2003; 56(5):562-568                                      | non pertinent |
| 7664 | Brennan et al.,     | 2003 | Oral surgery, oral medicine, oral pathology, oral radiology and endodontics. 2003; 95(4):416 | non pertinent |
| 7665 | Bouwmeester et al., | 2003 | Intensive care medicine. 2003; 29(11):2009-2015                                              | non pertinent |
| 7666 | Bonnet et al.,      | 2003 | J of clinical psychopharmacology. 2003; 23(5):514-519                                        | non pertinent |
| 7667 | Bentley et al.,     | 2003 | Neuroimage. 2003; 20(1):58-70                                                                | non pertinent |

|      |                     |      |                                                               |               |
|------|---------------------|------|---------------------------------------------------------------|---------------|
| 7668 | Bentley et al.,     | 2003 | J of neurophysiology. 2003; 90(2):1171-1181                   | non pertinent |
| 7669 | Beck et al.,        | 2003 | Arch Ophthalmol. 2003; 121(7):944-949                         | non pertinent |
| 7670 | Barker et al.,      | 2003 | J ect. 2003; 19(1):38-44                                      | non pertinent |
| 7671 | Balit et al.,       | 2003 | J of toxicology. Clinical toxicology. 2003; 41(6):801-808     | non pertinent |
| 7672 | Bahr et al.,        | 2003 | J of antimicrobial chemotherapy. 2003; 51(6):1377-1388        | non pertinent |
| 7673 | Babul et al.,       | 2003 | Clinical j of sport medicine. 2003; 13(3):138-147             | non pertinent |
| 7674 | Attenburrow et al., | 2003 | Psychopharmacology (Berl). 2003; 169(1):104-107               | non pertinent |
| 7675 | Ashina et al.,      | 2003 | Cephalalgia. 2003; 23(2):109-116                              | non pertinent |
| 7676 | Arrieta et al.,     | 2003 | Antimicrobial agents and chemotherapy. 2003; 47(10):3179-3186 | non pertinent |
| 7677 | Aristegui et al.,   | 2003 | Vaccine. 2003; 21(25-26):3593-3600                            | non pertinent |
| 7678 | Appolinario et al., | 2003 | Archives of general psychiatry. 2003; 60(11):1109-1116        | non pertinent |
| 7679 | Angst et al.,       | 2003 | Pain. 2003; 106(1-2):49-57                                    | non pertinent |
| 7680 | Anderson et al.,    | 2003 | J Neurosci. 2003; 23(13):5627-5633                            | non pertinent |
| 7681 | Almeida et al.,     | 2003 | Drugs in R&D. 2003; 4(4):207-217                              | non pertinent |
| 7682 | Allen et al.,       | 2003 | Psychopharmacology (Berl). 2003; 166(3):228-233               | non pertinent |
| 7683 | Akhondzadeh et al., | 2003 | J of clinical pharmacy and therapeutics. 2003; 28(5):379-384  | non pertinent |
| 7684 | Ahmad et al.,       | 2003 | Anesthesiology. 2003; 98(4):849-852                           | non pertinent |
| 7685 | Aaron et al.,       | 2003 | Respiratory medicine. 2003; 97(11):1195-1199                  | non pertinent |
| 7686 | Aapro et al.,       | 2003 | Annals of oncology. 2003; 14(3):441-448                       | non pertinent |

|      |                      |      |                                                                                |               |
|------|----------------------|------|--------------------------------------------------------------------------------|---------------|
| 7687 | Müllges et al.,      | 2003 | Cerebrovascular diseases (basel, switzerland). 2003; 15(3):222-229             | non pertinent |
| 7688 | Raymond et al.,      | 2003 | Alcoholism, clinical and experimental research. 2003; 27(7):1123-1131          | non pertinent |
| 7689 | Zangara et al.,      | 2002 | Psychopharmacology (Berl). 2002; 163(1):36-41                                  | non pertinent |
| 7690 | Zachrisson et al.,   | 2002 | European j of pain (London, England). 2002; 6(6):455-466                       | non pertinent |
| 7691 | Xia et al.,          | 2002 | J of clinical anesthesia. 2002; 14(5):339-343                                  | non pertinent |
| 7692 | Wu et al.,           | 2002 | Neuroimage. 2002; 16(4):1028-1037                                              | non pertinent |
| 7693 | Woessner et al.,     | 2002 | Arthritis and rheumatism. 2002; 46(8):2201-                                    | non pertinent |
| 7694 | Wilner et al.,       | 2002 | J of clinical pharmacology. 2002; 42(9):1027-1030                              | non pertinent |
| 7695 | Williams et al.,     | 2002 | J of rheumatology. 2002; 29(6):1280-1286                                       | non pertinent |
| 7696 | Wiederhold et al.,   | 2002 | IEEE transactions on information technology in biomedicine. 2002; 6(3):218-223 | non pertinent |
| 7697 | Wetzel et al.,       | 2002 | Current opinion in orthopaedics. 2002; 13(3):172-177                           | non pertinent |
| 7698 | Wetzel et al.,       | 2002 | British j of sports medicine. 2002; 36(3):183-188                              | non pertinent |
| 7699 | Walters et al.,      | 2002 | British j of clinical pharmacology. 2002; 53(3):305-311                        | non pertinent |
| 7700 | Wallace et al.,      | 2002 | J of Pain. 2002; 3(3):227-233                                                  | non pertinent |
| 7701 | Van Honk et al.,     | 2002 | Biol Psychiatry. 2002; 52(4):312-317                                           | non pertinent |
| 7702 | Van der Post et al., | 2002 | Cephalalgia. 2002; 22(4):271-281                                               | non pertinent |
| 7703 | Vad et al.,          | 2002 | Spine (Phila Pa 1976). 2002; 27(1):11-16                                       | non pertinent |
| 7704 | Udelson et al.,      | 2002 | Jama. 2002; 288(21):2693-2700                                                  | non pertinent |

|      |                    |      |                                                                 |               |
|------|--------------------|------|-----------------------------------------------------------------|---------------|
| 7705 | Tracey et al.,     | 2002 | J Neurosci. 2002; 22(7):2748-2752                               | non pertinent |
| 7706 | Tohda et al.,      | 2002 | Clinical and experimental allergy. 2002; 32(8):1180-1186        | non pertinent |
| 7707 | Tessitore et al.,  | 2002 | J of neuroscience. 2002; 22(20):9099-9103                       | non pertinent |
| 7708 | Tervo et al.,      | 2002 | Developmental medicine and neurology. 2002; 44(6):383-390       | non pertinent |
| 7709 | Tecchio et al.,    | 2002 | Hum Brain Mapp. 2002; 17(1):28-36                               | non pertinent |
| 7710 | Tebbutt et al.,    | 2002 | Annals of oncology. 2002; 13(10):1568-1575                      | non pertinent |
| 7711 | Tang et al.,       | 2002 | Human reproduction (Oxford, England). 2002; 17(11):2865-2868    | non pertinent |
| 7712 | Suputtitada        | 2002 | Am J Phys Med Rehabil. 2002; 81(10):770-775                     | non pertinent |
| 7713 | Storr et al.,      | 2002 | BMC gastroenterology. 2002; 2                                   | non pertinent |
| 7714 | Stewart et al.,    | 2002 | J of ocular pharmacology and therapeutics. 2002; 18(3):211-220  | non pertinent |
| 7715 | Spath              | 2002 | Rheumatic disease clinics of north america. 2002; 28(2):319-328 | non pertinent |
| 7716 | Smith et al.,      | 2002 | Progress in anesthesiology. 2002; 16(14):219-230                | non pertinent |
| 7717 | Slappendel et al., | 2002 | European j of anaesthesiology. 2002; 19(11):829-831             | non pertinent |
| 7718 | Skrumsager et al., | 2002 | British j of clinical pharmacology. 2002; 53(3):284-295         | non pertinent |
| 7719 | Siris et al.,      | 2002 | Osteoporosis international. 2002; 13(11):907-913                | non pertinent |
| 7720 | Shah et al.,       | 2002 | Gastrointest Endosc. 2002; 55(7):832-837                        | non pertinent |
| 7721 | Schuck et al.,     | 2002 | Fundam Clin Pharmacol. 2002; 16(1):57-65                        | non pertinent |

|      |                    |      |                                                                                   |               |
|------|--------------------|------|-----------------------------------------------------------------------------------|---------------|
| 7722 | Schacker et al.,   | 2002 | Antimicrobial agents and chemotherapy. 2002; 46(10):3243-3248                     | non pertinent |
| 7723 | Rosch et al.,      | 2002 | Gastrointest Endosc. 2002; 55(7):870-876                                          | non pertinent |
| 7724 | Röhss et al.,      | 2002 | Digestive diseases and sciences. 2002; 47(5):954-958                              | non pertinent |
| 7725 | Rewari et al.,     | 2002 | Anaesthesia and intensive care. 2002; 30(4):433-437                               | non pertinent |
| 7726 | Reinders et al.,   | 2002 | Neuroimage. 2002; 17(4):1844-1853                                                 | non pertinent |
| 7727 | Poyares et al.,    | 2002 | Progress in neuro-psychopharmacology & biological psychiatry. 2002; 26(3):539-545 | non pertinent |
| 7728 | Porro et al.,      | 2002 | J Neurosci. 2002; 22(8):3206-3214                                                 | non pertinent |
| 7729 | Pieniaszek et al., | 2002 | J of clinical pharmacology. 2002; 42(7):738-753                                   | non pertinent |
| 7730 | Petrovic et al.,   | 2002 | Science (New York, N.Y.). 2002; 295(5560):1737-1740                               | non pertinent |
| 7731 | Peter et al.,      | 2002 | American j of emergency medicine. 2002; 20(6):562-566                             | non pertinent |
| 7732 | Pecking et al.,    | 2002 | British j of clinical pharmacology. 2002; 54(4):357-362                           | non pertinent |
| 7733 | Pearl et al.,      | 2002 | Obstetrics and gynecology. 2002; 99(5 Pt 1):704-708                               | non pertinent |
| 7734 | Paterson           | 2002 | Clinical breast cancer. 2002; 3(3):206-216                                        | non pertinent |
| 7735 | Pandya et al.,     | 2002 | Rheumatology international. 2002; 22(1):1-4                                       | non pertinent |
| 7736 | Otsuji et al.,     | 2002 | Therapeutic drug monitoring. 2002; 24(3):375-378                                  | non pertinent |
| 7737 | Oga et al.,        | 2002 | Psychiatry Clin Neurosci. 2002; 56(4):355-363                                     | non pertinent |
| 7738 | Oerlemans et al.,  | 2002 | Nederlands tijdschrift voor geneeskunde. 2002; 146(19):895-902                    | non pertinent |



|      |                       |      |                                                              |               |
|------|-----------------------|------|--------------------------------------------------------------|---------------|
| 7739 | Nct - Hoffman         | 2002 | National Library of Medicine. 2002                           | non pertinent |
| 7740 | Nagasaki et al.,      | 2002 | Masui. The japanese j of anesthesiology. 2002; 51(8):846-850 | non pertinent |
| 7741 | Naber                 | 2002 | International j of antimicrobial agents. 2002; 20(1):18-27   | non pertinent |
| 7742 | Myles et al.,         | 2002 | Anesth Analg. 2002; 95(4):805-812                            | non pertinent |
| 7743 | Moulton et al.,       | 2002 | Clinical cancer research. 2002; 8(7):2044-2051               | non pertinent |
| 7744 | Morris et al.,        | 2002 | Neuroimage. 2002; 17(1):214-222                              | non pertinent |
| 7745 | Moll et al.,          | 2002 | J Neurosci. 2002; 22(7):2730-2736                            | non pertinent |
| 7746 | Mohar et al.,         | 2002 | American j of gastroenterology. 2002; 97(10):2530-2535       | non pertinent |
| 7747 | Mirzai et al.,        | 2002 | Spine (Phila Pa 1976). 2002; 27(4):343-346                   | non pertinent |
| 7748 | Michelson et al.,     | 2002 | American j of psychiatry. 2002; 159(11):1896-1901            | non pertinent |
| 7749 | Mencke et al.,        | 2002 | Der Anaesthesist. 2002; 51(9):721-725                        | non pertinent |
| 7750 | Martini et al.,       | 2002 | J of cataract and refractive surgery. 2002; 28(6):1018-1022  | non pertinent |
| 7751 | Martin-Garcia et al., | 2002 | Chest. 2002; 121(6):1812-1817                                | non pertinent |
| 7752 | Malmstrom et al.,     | 2002 | Clinical therapeutics. 2002; 24(10):1549-1560                | non pertinent |
| 7753 | Maihofner et al.,     | 2002 | Pain. 2002; 100(3):281-290                                   | non pertinent |
| 7754 | Lowe et al.,          | 2002 | J of cosmetic and laser therapy. 2002; 4(1):15-18            | non pertinent |
| 7755 | Loughnan et al.,      | 2002 | British j of anaesthesia. 2002; 89(3):466-472                | non pertinent |
| 7756 | Looareesuwan et al.,  | 2002 | British j of clinical pharmacology. 2002; 53(5):492-500      | non pertinent |
| 7757 | Lok et al.,           | 2002 | Human reproduction (Oxford, England). 2002; 17(8):2101-2106  | non pertinent |

|      |                  |      |                                                                                  |               |
|------|------------------|------|----------------------------------------------------------------------------------|---------------|
| 7758 | Lim et al.,      | 2002 | J of international medical research. 2002; 30(2):137-143                         | non pertinent |
| 7759 | Levett et al.,   | 2002 | HIV clinical trials. 2002; 3(4):272-278                                          | non pertinent |
| 7760 | Leslie et al.,   | 2002 | Anesth Analg. 2002; 94(5):1298-1303                                              | non pertinent |
| 7761 | Lehmann et al.,  | 2002 | Anesth Analg. 2002; 95(3):639-644                                                | non pertinent |
| 7762 | Lee et al.,      | 2002 | International j of urology. 2002; 9(5):247-252                                   | non pertinent |
| 7763 | Laureys et al.,  | 2002 | Neuroimage. 2002; 17(2):732-741                                                  | non pertinent |
| 7764 | Lang et al.,     | 2002 | Spine (Phila Pa 1976). 2002; 27(20):2284-2290                                    | non pertinent |
| 7765 | Kuo et al.,      | 2002 | Aliment Pharmacol Ther. 2002; 16(2):225-233                                      | non pertinent |
| 7766 | Kuiken et al.,   | 2002 | Alimentary pharmacology & therapeutics. 2002; 16(11):1955-1962                   | non pertinent |
| 7768 | Krenn et al.,    | 2002 | British j of anaesthesia. 2002; 89(4):637-640                                    | non pertinent |
| 7769 | Kong et al.,     | 2002 | J of alternative and complementary medicine (New York, N.Y.). 2002; 8(4):411-419 | non pertinent |
| 7770 | Kelion et al.,   | 2002 | Heart (British Cardiac Society). 2002; 87(2):115-120                             | non pertinent |
| 7771 | Kawamata et al., | 2002 | Pain. 2002; 100(1-2):77-89                                                       | non pertinent |
| 7772 | Jernberg et al., | 2002 | J of the American College of Cardiology. 2002; 40(3):437-445                     | non pertinent |
| 7773 | Iversen et al.,  | 2002 | European urology. 2002; 42(3):204-211                                            | non pertinent |
| 7774 | Hügler et al.,   | 2002 | European j of pain (London, England). 2002; 6(6):435-445                         | non pertinent |
| 7775 | Holroyd          | 2002 | J of consulting and clinical psychology. 2002; 70(3):656-677                     | non pertinent |
| 7776 | Hentgen et al.,  | 2002 | Anesthesia and Analgesia. 2002; 95(3):597-605                                    | non pertinent |

|      |                    |      |                                                               |               |
|------|--------------------|------|---------------------------------------------------------------|---------------|
| 7777 | Hayashi et al.,    | 2002 | J Neurosurg. 2002; 97(5 Suppl):433-437                        | non pertinent |
| 7778 | Hawkes et al.,     | 2002 | Alimentary pharmacology & therapeutics. 2002; 16(9):1649-1654 | non pertinent |
| 7779 | Harman et al.,     | 2002 | Sleep. 2002; 25(7):775-783                                    | non pertinent |
| 7780 | Hariri et al.,     | 2002 | Neuroimage. 2002; 17(1):317-323                               | non pertinent |
| 7781 | Hariri et al.,     | 2002 | Neuropsychopharmacology. 2002; 27(6):1036-1040                | non pertinent |
| 7782 | Hanas et al.,      | 2002 | J of pediatrics. 2002; 140(3):315-320                         | non pertinent |
| 7783 | Halperin et al.,   | 2002 | Pediatric infectious disease j. 2002; 21(5):399-405           | non pertinent |
| 7784 | Guyader et al.,    | 2002 | Hepatology (baltimore, md.). 2002; 36(5):1197-1205            | non pertinent |
| 7785 | Grundman et al.,   | 2002 | J of molecular neuroscience. 2002; 18(3):283-293              | non pertinent |
| 7786 | Gross-Tsur et al., | 2002 | J of child neurology. 2002; 17(12):863-866                    | non pertinent |
| 7787 | Green              | 2002 | Somatosens Mot Res. 2002; 19(2):130-138                       | non pertinent |
| 7788 | Grachev et al.,    | 2002 | Chem Neuroanat. 2002; 23(3):223-230                           | non pertinent |
| 7789 | Grachev et al.,    | 2002 | J Neural Transm (Vienna). 2002; 109(10):1309-1334             | non pertinent |
| 7790 | Gordon et al.,     | 2002 | Anesthesia and Analgesia. 2002; 95(5):1351-1357               | non pertinent |
| 7791 | Forseth et al.,    | 2002 | Drugs. 2002; 62(4):577-592                                    | non pertinent |
| 7792 | Floravanti et al., | 2002 | Clinical therapeutics. 2002; 24(4):504-519                    | non pertinent |
| 7793 | Eisenach et al.,   | 2002 | Anesthesiology. 2002; 96(1):24-28                             | non pertinent |
| 7794 | Eisenach et al.,   | 2002 | Anesthesiology. 2002; 96(1):29-34                             | non pertinent |
| 7795 | Eimer et al.,      | 2002 | Neuroreport. 2002; 13(4):427-431                              | non pertinent |
| 7796 | Dunbar et al.,     | 2002 | Anesth Analg. 2002; 94(2):417-420                             | non pertinent |

|      |                                 |      |                                                                                |               |
|------|---------------------------------|------|--------------------------------------------------------------------------------|---------------|
| 7797 | Di Lazzaro et al.,              | 2002 | Clin Neurophysiol.<br>2002;<br>113(11):1673-<br>1679                           | non pertinent |
| 7798 | Desjardins et al.,              | 2002 | European j of<br>clinical<br>pharmacology.<br>2002; 58(6):387-<br>394          | non pertinent |
| 7799 | Derbyshire et al.,              | 2002 | Neuroimage.<br>2002; 16(1):158-<br>168                                         | non pertinent |
| 7800 | De los Rios<br>Castillo et al., | 2002 | Salud mental<br>(mexico city,<br>mexico). 2002;<br>25(2):21-31                 | non pertinent |
| 7801 | De Andres                       | 2002 | Expert review of<br>neurotherapeutics<br>. 2002; 2(6):791-<br>799              | non pertinent |
| 7802 | Dannecker et al.,               | 2002 | J Sports Med Phys<br>Fitness. 2002;<br>42(4):458-465                           | non pertinent |
| 7803 | Cook et al.,                    | 2002 | Psychopharmacol<br>ogy. 2002;<br>162(2):186-192                                | non pertinent |
| 7804 | Cohen et al.,                   | 2002 | Paediatric<br>anaesthesia. 2002;<br>12(7):604-609                              | non pertinent |
| 7805 | Choy et al.,                    | 2002 | Clinical and<br>experimental<br>rheumatology.<br>2002; 20(3):351-<br>358       | non pertinent |
| 7806 | Chow et al.,                    | 2002 | Hepatology<br>(baltimore, md.).<br>2002; 36(5):1221-<br>1226                   | non pertinent |
| 7807 | Chou et al.,                    | 2002 | International j of<br>clinical<br>pharmacology<br>research. 2002;<br>22(1):1-6 | non pertinent |
| 7808 | Chang et al.,                   | 2002 | Clinical<br>therapeutics.<br>2002; 24(4):490-<br>503                           | non pertinent |
| 7809 | Catalano et al.,                | 2002 | AJR. American j of<br>roentgenology.<br>2002; 178(2):379-<br>387               | non pertinent |
| 7810 | Carragee et al.,                | 2002 | Spine J. 2002;<br>2(1):25-34                                                   | non pertinent |
| 7811 | Carlsson et al.,                | 2002 | Drugs & aging.<br>2002; 19(10):793-<br>805                                     | non pertinent |
| 7812 | Calbo et al.,                   | 2002 | Medicina clinica.<br>2002; 118(1):1-4                                          | non pertinent |
| 7813 | Burton et al.,                  | 2002 | Annals of<br>emergency<br>medicine. 2002;<br>40(5):496-504                     | non pertinent |

|      |                       |      |                                                                      |               |
|------|-----------------------|------|----------------------------------------------------------------------|---------------|
| 7814 | Burkus et al.,        | 2002 | J of spinal disorders. 2002; 15(5):337-349                           | non pertinent |
| 7815 | Buckenmaier et al.,   | 2002 | Anesthesia and Analgesia. 2002; 95(5):1253-1257                      | non pertinent |
| 7816 | Buchei et al.,        | 2002 | J Neurosci. 2002; 22(3):970-976                                      | non pertinent |
| 7817 | Bruehl et al.,        | 2002 | Pain. 2002; 100(1-2):191-201                                         | non pertinent |
| 7818 | Bruehl et al.,        | 2002 | Pain. 2002; 99(1-2):223-233                                          | non pertinent |
| 7819 | Brandt et al.,        | 2002 | American j of gastroenterology. 2002; 97(11 SUPPL):1-26              | non pertinent |
| 7820 | Bernstein et al.,     | 2002 | American j of gastroenterology. 2002; 97(2):319-327                  | non pertinent |
| 7821 | Berman et al.,        | 2002 | Gastroenterology. 2002; 123(4):969-977                               | non pertinent |
| 7822 | Bergogne-Berezin      | 2002 | Expert opinion on pharmacotherapy. 2002; 3(10):1471-1479             | non pertinent |
| 7823 | Bacon et al.,         | 2002 | British j of clinical pharmacology. 2002; 53(6):629-636              | non pertinent |
| 7824 | Astin et al.,         | 2002 | Arthritis care & research. 2002; 47(3):291-302                       | non pertinent |
| 7825 | Asik et al.,          | 2002 | European j of anaesthesiology. 2002; 19(4):263-270                   | non pertinent |
| 7826 | Argyropoulos et al.,  | 2002 | Psychoneuroendocrinology. 2002; 27(6):715-729                        | non pertinent |
| 7827 | Anegon et al.,        | 2002 | Clinical therapeutics. 2002; 24(5):786-797                           | non pertinent |
| 7828 | Andrew et al.,        | 2002 | Anaesthesia and intensive care. 2002; 30(3):321-325                  | non pertinent |
| 7829 | Anderson et al.,      | 2002 | Pain. 2002; 99(1-2):207-216                                          | non pertinent |
| 7830 | Agneskirchner et al., | 2002 | Knee Surg Sports Traumatol Arthrosc. 2002; 10(3):160-168             | non pertinent |
| 7831 | Abe et al.,           | 2002 | Current medicinal chemistry – anti-cancer agents. 2002; 2(6):715-726 | non pertinent |
| 7832 | Witting et al.,       | 2001 | Neurology. 2001; 57(10):1817-1824                                    | non pertinent |
| 7833 | Wissel et al.,        | 2001 | J of neurology. 2001; 248(12):1073-1078                              | non pertinent |

|      |                         |      |                                                                                             |               |
|------|-------------------------|------|---------------------------------------------------------------------------------------------|---------------|
| 7834 | Williams et al.,        | 2001 | J of<br>periodontology.<br>2001; 72(11):1535-<br>1544                                       | non pertinent |
| 7835 | Wilder-Smith et<br>al., | 2001 | Can J Anaesth.<br>2001; 48(5):439-<br>445                                                   | non pertinent |
| 7836 | Wellmer et al.,         | 2001 | J of the peripheral<br>nervous system :<br>JPNS. 2001;<br>6(4):204-210                      | non pertinent |
| 7837 | Wambebe et al.,         | 2001 | Phytomedicine.<br>2001; 8(4):252-<br>261                                                    | non pertinent |
| 7838 | Vogt et al.,            | 2001 | Wound repair and<br>regeneration.<br>2001; 9(2):116-<br>122                                 | non pertinent |
| 7839 | Van Gaal et al.,        | 2001 | Diabetes, obesity<br>& metabolism.<br>2001; 3(5):326-<br>331                                | non pertinent |
| 7840 | Van den Hout et<br>al., | 2001 | Pain. 2001; 92(1-<br>2):247-257                                                             | non pertinent |
| 7841 | Turner et al.,          | 2001 | HIV medicine.<br>2001; 2(2):68-77                                                           | non pertinent |
| 7842 | Toubro et al.,          | 2001 | Ugeskrift for<br>laeger. 2001;<br>163(21):2935-<br>2940                                     | non pertinent |
| 7843 | Tomer et al.,           | 2001 | Thrombosis and<br>haemostasis.<br>2001; 85(6):966-<br>974                                   | non pertinent |
| 7844 | Thompson et al.,        | 2001 | British j of<br>anaesthesia. 2001;<br>87(2):283-286                                         | non pertinent |
| 7845 | Thompson et al.,        | 2001 | International j of<br>sport nutrition and<br>exercise<br>metabolism. 2001;<br>11(4):466-481 | non pertinent |
| 7846 | Temple et al.,          | 2001 | Rhinology. 2001;<br>39(4):230-232                                                           | non pertinent |
| 7847 | Tariot et al.,          | 2001 | J of the American<br>Geriatrics Society.<br>2001; 49(12):1590-<br>1599                      | non pertinent |
| 7848 | Sterling et al.,        | 2001 | Man Ther. 2001;<br>6(2):72-81                                                               | non pertinent |
| 7849 | Staats et al.,          | 2001 | Pain medicine<br>(Malden, Mass).<br>2001; 2(1):28-34                                        | non pertinent |
| 7850 | Song et al.,            | 2001 | European j of<br>nuclear medicine.<br>2001; 28(4):489-<br>497                               | non pertinent |
| 7851 | Singh et al.,           | 2001 | Indian j of<br>physiology and<br>pharmacology.<br>2001; 45(2):181-<br>190                   | non pertinent |
| 7852 | Shah et al.,            | 2001 | Anaesthesia. 2001;<br>56(4):302-308                                                         | non pertinent |

|      |                   |      |                                                                                                                                                                       |               |
|------|-------------------|------|-----------------------------------------------------------------------------------------------------------------------------------------------------------------------|---------------|
| 7853 | Seong et al.,     | 2001 | Ophthalmologica.<br>J international<br>d'ophthalmologie<br>(International j of<br>ophthalmology).<br>2001; 215(3):188-<br>191                                         | non pertinent |
| 7854 | Scorza et al.,    | 2001 | Clinical and<br>experimental<br>rheumatology.<br>2001; 19(5):503-<br>508                                                                                              | non pertinent |
| 7855 | Schwartz et al.,  | 2001 | Aliment<br>Pharmacol Ther.<br>2001; 15(12):1921-<br>1928                                                                                                              | non pertinent |
| 7856 | Schneider et al., | 2001 | Neuroradiology.<br>2001; 43(6):472-<br>476                                                                                                                            | non pertinent |
| 7857 | Sarullo et al.,   | 2001 | Italian heart j.<br>2001; 2(8):605-<br>611                                                                                                                            | non pertinent |
| 7858 | Saray et al.,     | 2001 | Acta chirurgiae<br>plasticae. 2001;<br>43(3):71-76                                                                                                                    | non pertinent |
| 7859 | Santiveri et al., | 2001 | Revista espanola<br>de anestesiologia<br>y reanimacion.<br>2001; 48(9):409-<br>414                                                                                    | non pertinent |
| 7860 | Sandler et al.,   | 2001 | J Oral Maxillofac<br>Surg. 2001;<br>59(6):603-611                                                                                                                     | non pertinent |
| 7861 | Salvarani et al., | 2001 | J of rheumatology.<br>2001; 28(10):2274-<br>2282                                                                                                                      | non pertinent |
| 7862 | Saller et al.,    | 2001 | Forschende<br>Komplementmedi<br>zin und klassische<br>Naturheilkunde<br>(Research in<br>complementary<br>and natural<br>classical<br>medicine). 2001;<br>8(6):373-382 | non pertinent |
| 7863 | Rossini et al.,   | 2001 | Multiple sclerosis<br>(houndmills,<br>basingstoke,<br>england). 2001;<br>7(6):354-358                                                                                 | non pertinent |
| 7864 | Rome et al.,      | 2001 | Clinical<br>biomechanics<br>(Britol, Avon).<br>2001; 16(10):901-<br>905                                                                                               | non pertinent |
| 7865 | Rachev et al.,    | 2001 | Current medical<br>research and<br>opinion. 2001;<br>17(2):105-110                                                                                                    | non pertinent |
| 7866 | Quattrin et al.,  | 2001 | J of pediatric<br>endocrinology &<br>metabolism. 2001;<br>14(3):267-277                                                                                               | non pertinent |

|      |                    |      |                                                                             |               |
|------|--------------------|------|-----------------------------------------------------------------------------|---------------|
| 7867 | Pollak et al.,     | 2001 | Psychophysiology. 2001; 38(2):267-274                                       | non pertinent |
| 7868 | Ploghaus et al.,   | 2001 | Neurosci. 2001; 21(24):9896-9903                                            | non pertinent |
| 7869 | Piscoya et al.,    | 2001 | Inflammation research. 2001; 50(9):442-448                                  | non pertinent |
| 7870 | Phillips et al.,   | 2001 | American j of gastroenterology. 2001; 96(2):409-416                         | non pertinent |
| 7871 | Petroni et al.,    | 2001 | Alimentary pharmacology & therapeutics. 2001; 15(1):123-128                 | non pertinent |
| 7872 | Pessina et al.,    | 2001 | Blood pressure. 2001; 10(3):176-183                                         | non pertinent |
| 7873 | Persson et al.,    | 2001 | Disability and rehabilitation. 2001; 23(8):325-335                          | non pertinent |
| 7874 | Pereira et al.,    | 2001 | J of periodontology. 2001; 72(12):1720-1725                                 | non pertinent |
| 7875 | Pendeville et al., | 2001 | Acta anaesthesiologica belgica. 2001; 52(2):181-186                         | non pertinent |
| 7876 | Passàli et al.,    | 2001 | Clinical therapeutics. 2001; 23(9):1508-1518                                | non pertinent |
| 7877 | Park et al.,       | 2001 | J of the peripheral nervous system : JPNS. 2001; 6(4):232-240               | non pertinent |
| 7878 | Pagella et al.,    | 2001 | Otorinolaringologi a. 2001; 51(2):77-81                                     | non pertinent |
| 7879 | Ozaki et al.,      | 2001 | J canadien d'anesthesie (Canadian j of anaesthesia). 2001; 48(11):1080-1083 | non pertinent |
| 7880 | Onen et al.,       | 2001 | J Sleep Res. 2001; 10(1):35-42                                              | non pertinent |
| 7881 | Olausson et al.,   | 2001 | Brain. 2001; 124(Pt 5):916-927                                              | non pertinent |
| 7882 | Norman et al.,     | 2001 | Anesthesiology. 2001; 94(4):599-603                                         | non pertinent |
| 7883 | Nielson et al.,    | 2001 | Clinical J of Pain. 2001; 17(4 SUPPL):114-127                               | non pertinent |
| 7884 | Negishi et al.,    | 2001 | Anesthesiology. 2001; 94(2):218-222                                         | non pertinent |
| 7885 | Nct - Shen         | 2001 | National Library of Medicine. 2001                                          | non pertinent |



|      |                                                              |      |                                                       |               |
|------|--------------------------------------------------------------|------|-------------------------------------------------------|---------------|
| 7886 | Nct – National Institute of Dental and Craniofacial Research | 2001 | National Library of Medicine. 2001                    | non pertinent |
| 7887 | Nakabeppu et al.,                                            | 2001 | Annals of nuclear medicine. 2001; 15(5):459-463       | non pertinent |
| 7888 | Mullican et al.,                                             | 2001 | Clinical therapeutics. 2001; 23(9):1429-1445          | non pertinent |
| 7889 | Mould et al.,                                                | 2001 | Vox sanguinis. 2001; 80(3):151-158                    | non pertinent |
| 7890 | Miller et al.,                                               | 2001 | J Pediatr. 2001; 139(6):785-789                       | non pertinent |
| 7891 | Miller et al.,                                               | 2001 | AANA j. 2001; 69(3):185-187                           | non pertinent |
| 7892 | Meyer et al.,                                                | 2001 | Zeitschrift für medizinische physik. 2001; 11(1):5-13 | non pertinent |
| 7893 | McDonald et al.,                                             | 2001 | Res Nurs Health. 2001; 24(5):402-409                  | non pertinent |
| 7894 | Mathew                                                       | 2001 | Clinical cornerstone. 2001; 4(3):1-16                 | non pertinent |
| 7895 | Mannion et al.,                                              | 2001 | Schmerz (berlin, germany). 2001; 15(6):468-473        | non pertinent |
| 7896 | Luginbuhl et al.,                                            | 2001 | Anesthesiology. 2001; 95(1):22-29                     | non pertinent |
| 7897 | Lefaucheur et al.,                                           | 2001 | Muscle Nerve. 2001; 24(4):496-501                     | non pertinent |
| 7898 | Layton et al.,                                               | 2001 | Depress Anxiety. 2001; 14(4):251-254                  | non pertinent |
| 7899 | Lancaster et al.,                                            | 2001 | Int J Cardiol. 2001; 80(2-3):201-207                  | non pertinent |
| 7900 | Laakso et al.,                                               | 2001 | Behav Brain Res. 2001; 118(2):187-193                 | non pertinent |
| 7901 | Krucoff et al.,                                              | 2001 | American heart j. 2001; 142(5):760-769                | non pertinent |
| 7902 | Kronenberg et al.,                                           | 2001 | Depress Anxiety. 2001; 14(2):141-144                  | non pertinent |
| 7903 | Kozuch et al.,                                               | 2001 | Cancer. 2001; 91(4):815-821                           | non pertinent |
| 7904 | Kopacz et al.,                                               | 2001 | Anesthesiology. 2001; 95(6):1371-1376                 | non pertinent |
| 7905 | Ko et al.,                                                   | 2001 | Acta anaesthesiologica sinica. 2001; 39(4):169-177    | non pertinent |
| 7906 | Kligman et al.,                                              | 2001 | Arch Orthop Trauma Surg. 2001; 121(3):139-141         | non pertinent |

|      |                             |      |                                                                                    |               |
|------|-----------------------------|------|------------------------------------------------------------------------------------|---------------|
| 7907 | Kieffer et al.,             | 2001 | International<br>angiology. 2001;<br>20(1):58-65                                   | non pertinent |
| 7908 | Karl et al.,                | 2001 | J Neurosci. 2001;<br>21(10):3609-3618                                              | non pertinent |
| 7909 | Karim et al.,               | 2001 | J of clinical<br>pharmacology.<br>2001; 41(10):1111-<br>1119                       | non pertinent |
| 7910 | Huse et al.,                | 2001 | Pain. 2001; 90(1-<br>2):47-55                                                      | non pertinent |
| 7911 | Hollenhorst et al.,         | 2001 | AJR Am J<br>Roentgenol. 2001;<br>176(4):865-868                                    | non pertinent |
| 7912 | Hasaniya et al.,            | 2001 | Surgical<br>endoscopy. 2001;<br>15(9):962-964                                      | non pertinent |
| 7913 | Harris et al.,              | 2001 | Peritoneal dialysis<br>international.<br>2001; 21 Suppl<br>3:144-147               | non pertinent |
| 7914 | Hand et al.,                | 2001 | AANA j. 2001;<br>69(6):466-470                                                     | non pertinent |
| 7915 | Hachero Torrejon<br>et al., | 2001 | Revista espanola<br>de anestesiologia y<br>reanimacion.<br>2001; 48(8):364-<br>369 | non pertinent |
| 7916 | Gustorff et al.,            | 2001 | Anesth Analg.<br>2001; 92(2):369-<br>374                                           | non pertinent |
| 7917 | Gürsoy et al.,              | 2001 | Rheumatology<br>international.<br>2001; 21(2):58-61                                | non pertinent |
| 7918 | Gulsoy et al.,              | 2001 | Lasers Surg Med.<br>2001; 28(3):244-<br>247                                        | non pertinent |
| 7919 | Grusser et al.,             | 2001 | Neuroscience.<br>2001; 102(2):263-<br>272                                          | non pertinent |
| 7920 | Grunau et al.,              | 2001 | Pediatrics. 2001;<br>107(1):105-112                                                | non pertinent |
| 7921 | Gomolin et al.,             | 2001 | J of the American<br>Geriatrics Society.<br>2001; 49(12):1606-<br>1613             | non pertinent |
| 7922 | Gasparini et al.,           | 2001 | European j of<br>epidemiology.<br>2001; 17(2):135-<br>140                          | non pertinent |
| 7923 | Garcia et al.,              | 2001 | Revista brasileira<br>de anestesiologia.<br>2001; 51(5):377-<br>384                | non pertinent |
| 7924 | Gale et al.,                | 2001 | Anaesth Intensive<br>Care. 2001;<br>29(6):579-584                                  | non pertinent |
| 7925 | Friedman et al.,            | 2001 | Heart disease.<br>2001; 3(6):357-<br>361                                           | non pertinent |
| 7926 | Flor et al.,                | 2001 | Lancet (london,<br>england). 2001;<br>357(9270):1763-<br>1764                      | non pertinent |

|      |                     |      |                                                                                 |               |
|------|---------------------|------|---------------------------------------------------------------------------------|---------------|
| 7927 | Flach et al.,       | 2001 | Transactions of the american ophthalmological society. 2001; 99:205-212         | non pertinent |
| 7928 | Fernieini et al.,   | 2001 | Oral Surg Oral Med Oral Pathol Radiol Endod. 2001; 91(5):526-530                | non pertinent |
| 7929 | Ferdinand et al.,   | 2001 | American j of hypertension. 2001; 14(8 Pt 1):788-793                            | non pertinent |
| 7930 | Ehlers et al.,      | 2001 | Annals of anatomy. 2001; 183(1):13-17                                           | non pertinent |
| 7931 | Edwards et al.,     | 2001 | J of gastroenterology and hepatology (australia). 2001; 16(11):1235-1238        | non pertinent |
| 7932 | Di Pasquale et al., | 2001 | Italian heart j. 2001; 2(10):751-756                                            | non pertinent |
| 7933 | Demir et al.,       | 2001 | J of gastroenterology and hepatology (australia). 2001; 16(9):1071-1074         | non pertinent |
| 7934 | Dalery et al.,      | 2001 | Encephale. 2001; 27(1):71-81                                                    | non pertinent |
| 7935 | D'Hooge et al.,     | 2001 | International angiology. 2001; 20(4):288-294                                    | non pertinent |
| 7936 | Convery et al.,     | 2001 | British j of anaesthesia. 2001; 87(4):570-576                                   | non pertinent |
| 7937 | Coan et al.,        | 2001 | Psychophysiology. 2001; 38(6):912-925                                           | non pertinent |
| 7938 | Chung et al.,       | 2001 | Clinical therapeutics. 2001; 23(6):858-870                                      | non pertinent |
| 7939 | Chen et al.,        | 2001 | Neurosci Lett. 2001; 297(3):183-186                                             | non pertinent |
| 7940 | Chang et al.,       | 2001 | Clinical therapeutics. 2001; 23(9):1446-1455                                    | non pertinent |
| 7941 | Cha et al.,         | 2001 | International j of clinical pharmacology and therapeutics. 2001; 39(12):539-545 | non pertinent |
| 7942 | Cabarrocas          | 2001 | Clinical therapeutics. 2001; 23(11):1867-1875                                   | non pertinent |
| 7943 | Cabane et al.,      | 2001 | Presse medicale. 2001; 30(18):885-891                                           | non pertinent |

|      |                               |      |                                                                          |               |
|------|-------------------------------|------|--------------------------------------------------------------------------|---------------|
| 7944 | Brooks et al.,                | 2001 | J Am Coll Cardiol. 2001; 38(6):1589-1595                                 | non pertinent |
| 7945 | Brennum et al.,               | 2001 | Acta anaesthesiologica Scandinavica. 2001; 45(8):954-960                 | non pertinent |
| 7946 | Boucher et al.,               | 2001 | J canadien d'anesthesie (Canadian j of anaesthesia). 2001; 48(5):466-469 | non pertinent |
| 7947 | Boccalon et al.,              | 2001 | Annales of cardiologie ET d'angeiologie. 2001; 50(3):175-182             | non pertinent |
| 7948 | Biella et al.,                | 2001 | Neuroimage. 2001; 14(1 Pt 1):60-66                                       | non pertinent |
| 7949 | Baran                         | 2001 | British j of dermatology. 2001; 145 Suppl 60:15-19                       | non pertinent |
| 7950 | Baldwin et al.,               | 2001 | J Gerontol A Biol Sci Med Sci. 2001; 56(8):M510-513                      | non pertinent |
| 7951 | Bakheit et al.,               | 2001 | European j of neurology. 2001; 8(6):559-565                              | non pertinent |
| 7952 | Arslan et al.,                | 2001 | Rheumatology international. 2001; 21(1):20-23                            | non pertinent |
| 7953 | Amanzio et al.,               | 2001 | Pain. 2001; 90(3):205-215                                                | non pertinent |
| 7954 | Allescher et al.,             | 2001 | Endoscopy. 2001; 33(12):1007-1017                                        | non pertinent |
| 7955 | Alfieri                       | 2001 | J Neurosurg Sci. 2001; 45(1):15-18                                       | non pertinent |
| 7956 | Alden et al.,                 | 2001 | Appl Psychophysiol Biofeedback. 2001; 26(2):117-126                      | non pertinent |
| 7957 | Aichelmann-Reidy              | 2001 | J of periodontology. 2001; 72(8):998-1005                                | non pertinent |
| 7958 | Affaitati et al.,             | 2001 | Drugs under experimental and clinical research. 2001; 27(2):69-76        | non pertinent |
| 7959 | European Atosiban Study Group | 2001 | Acta obstetrica ET gynecologica scandinavica. 2001; 80(5):413-422        | non pertinent |
| 7960 | Zhai et al.,                  | 2000 | Skin pharmacology and applied skin physiology. 2000; 13(6):352-357       | non pertinent |

|      |                               |      |                                                                                         |               |
|------|-------------------------------|------|-----------------------------------------------------------------------------------------|---------------|
| 7961 | Yocum et al.,                 | 2000 | Archives of internal medicine. 2000; 160(19):2947-2954                                  | non pertinent |
| 7962 | Wang et al.,                  | 2000 | Pain. 2000; 88(2):189-197                                                               | non pertinent |
| 7963 | Walker et al.,                | 2000 | J of clinical psychopharmacology. 2000; 20(6):636-644                                   | non pertinent |
| 7964 | Vogel et al.,                 | 2000 | Proc-annu-meet-am-soc-clin-oncol. 2000; 19:Abstract275                                  | non pertinent |
| 7965 | Videman et al.,               | 2000 | Clin Biomech (Bristol, Avon). 2000; 15(2):83-86                                         | non pertinent |
| 7966 | Vélez et al.,                 | 2000 | Transactions of the Royal Society of Tropical Medicine and Hygiene. 2000; 94(6):698-703 | non pertinent |
| 7967 | Veldhuyzen Van Zanten et al., | 2000 | Alimentary pharmacology & therapeutics. 2000; 14(12):1605-1611                          | non pertinent |
| 7968 | Van zandwijk et al.,          | 2000 | J of the National Cancer Institute. 2000; 92(12):977-986                                | non pertinent |
| 7969 | Van Dyck et al.,              | 2000 | Archives of general psychiatry. 2000; 57(2):157-164                                     | non pertinent |
| 7970 | Van den Hout et al.,          | 2000 | Eur J Pain. 2000; 4(4):335-346                                                          | non pertinent |
| 7971 | Uhlemann et al.,              | 2000 | Physikalische medizin rehabilitationsmedizin kurortmedizin. 2000; 10(3):86-93           | non pertinent |
| 7972 | Thjodleifsson et al.,         | 2000 | Digestive diseases and sciences. 2000; 45(5):845-853                                    | non pertinent |
| 7973 | Telch et al.,                 | 2000 | Behaviour research and therapy. 2000; 38(4):373-387                                     | non pertinent |
| 7974 | Stowers et al.,               | 2000 | Annals of emergency medicine. 2000; 35(1):17-25                                         | non pertinent |
| 7975 | Spiegel et al.,               | 2000 | Clin Neurophysiol. 2000; 111(4):725-735                                                 | non pertinent |
| 7976 | Sperber et al.,               | 2000 | Archives of family medicine. 2000; 9(10):979-985                                        | non pertinent |

|      |                     |      |                                                                   |               |
|------|---------------------|------|-------------------------------------------------------------------|---------------|
| 7977 | Silberstein et al., | 2000 | Headache. 2000; 40(6):445-450                                     | non pertinent |
| 7978 | Shekelle et al.,    | 2000 | Health Serv Res. 2000; 34(7):1429-1448                            | non pertinent |
| 7979 | Shao et al.,        | 2000 | Anesth Analg. 2000; 91(4):871-875                                 | non pertinent |
| 7980 | Schimel et al.,     | 2000 | J Pers Soc Psychol. 2000; 78(3):446-462                           | non pertinent |
| 7981 | Schachter et al.,   | 2000 | Expert opinion on investigational drugs. 2000; 9(4):871-883       | non pertinent |
| 7982 | Sawamoto et al.,    | 2000 | J Neurosci. 2000; 20(19):7438-7445                                | non pertinent |
| 7983 | Sarullo et al.,     | 2000 | Italian heart j supplement. 2000; 1(1):81-87                      | non pertinent |
| 7984 | Rouillon et al.,    | 2000 | International clinical psychopharmacol ogy. 2000; 15(3):133-140   | non pertinent |
| 7985 | Rosen et al.,       | 2000 | Ann Med. 2000; 32(5):350-364                                      | non pertinent |
| 7986 | Romanowski et al.,  | 2000 | AIDS (london, england). 2000; 14(9):1211-1217                     | non pertinent |
| 7987 | Romaniello et al.,  | 2000 | Exp Brain Res. 2000; 132(3):306-313                               | non pertinent |
| 7988 | Ripouteau et al.,   | 2000 | Bmj. 2000; 321(7274):1460-1463                                    | non pertinent |
| 7989 | Prahalad et al.,    | 2000 | Arthritis and rheumatism. 2000; 43(10):2339-                      | non pertinent |
| 7990 | Ploner et al.,      | 2000 | J Neurophysiol. 2000; 83(3):1770-1776                             | non pertinent |
| 7991 | Petrovic et al.,    | 2000 | Pain. 2000; 85(1-2):19-30                                         | non pertinent |
| 7992 | Pépin et al.,       | 2000 | Bulletin of the world health organization. 2000; 78(11):1284-1295 | non pertinent |
| 7993 | Penson et al.,      | 2000 | Clinical pharmacology and therapeutics. 2000; 68(6):667-676       | non pertinent |
| 7994 | Pasqualucci et al., | 2000 | Acta anaesthesiologica Scnadinavica. 2000; 44(8):910-918          | non pertinent |
| 7995 | Pares et al.,       | 2000 | J of hepatology. 2000; 32(4):561-566                              | non pertinent |

|      |                          |      |                                                                  |               |
|------|--------------------------|------|------------------------------------------------------------------|---------------|
| 7996 | Palme et al,             | 2000 | Laryngoscope.<br>2000;<br>110(12):2000-<br>2004                  | non pertinent |
| 7997 | Paddock et al.,          | 2000 | J Genet Psychol.<br>2000; 161(4):453-<br>468                     | non pertinent |
| 7998 | Otto et al,              | 2000 | J of anxiety<br>disorders. 2000;<br>14(4):345-358                | non pertinent |
| 7999 | Ong et al.,              | 2000 | Anaesthesia and<br>intensive care.<br>2000; 28(5):527-<br>531    | non pertinent |
| 8000 | Nishina et al.,          | 2000 | Paediatric<br>anaesthesia. 2000;<br>10(6):645-651                | non pertinent |
| 8001 | Nguyen et al.,           | 2000 | Arch Med Res.<br>2000; 31(3):263-<br>265                         | non pertinent |
| 8002 | Nevitt et al.,           | 2000 | Archives of<br>internal medicine.<br>2000; 160(1):77-<br>85      | non pertinent |
| 8003 | Mosimann et al.,         | 2000 | Psychiatry Res.<br>2000; 94(3):251-<br>256                       | non pertinent |
| 8004 | Morgan et al.,           | 2000 | American j of<br>hypertension.<br>2000; 13(11):1161-<br>1167     | non pertinent |
| 8005 | Moreno et al.,           | 2000 | J of physiology and<br>biochemistry.<br>2000; 56(3):209-<br>216  | non pertinent |
| 8006 | Moore et al.,            | 2000 | American j of<br>hematology. 2000;<br>64(1):26-31                | non pertinent |
| 8007 | Miller et al.,           | 2000 | Clinical<br>therapeutics.<br>2000; 22(12):1433-<br>1442          | non pertinent |
| 8008 | Meyers et al.,           | 2000 | Appl<br>Neuropsychol.<br>2000; 7(3):133-<br>139                  | non pertinent |
| 8009 | Malaguarnera et<br>al.,  | 2000 | Diabetes, obesity<br>& metabolism.<br>2000; 2(1):33-38           | non pertinent |
| 8010 | Lozano-Tonkin et<br>al., | 2000 | Anales de<br>medicina interna.<br>2000; 17(8):399-<br>405        | non pertinent |
| 8011 | Lazowski                 | 2000 | Annals of<br>transplantation.<br>2000; 5(1):28-29                | non pertinent |
| 8012 | Lauretti et al.,         | 2000 | J of clinical<br>anesthesia. 2000;<br>12(6):444-448              | non pertinent |
| 8013 | Lanza et al.,            | 2000 | American j of<br>gastroenterology.<br>2000; 95(11):3112-<br>3117 | non pertinent |
| 8014 | Kwan et al.,             | 2000 | Pain. 2000;<br>85(3):359-374                                     | non pertinent |

|      |                   |      |                                                                             |               |
|------|-------------------|------|-----------------------------------------------------------------------------|---------------|
| 8015 | Kraj et al.,      | 2000 | Acta poloniae<br>pharmaceutica.<br>2000; 57 Suppl:113-<br>116               | non pertinent |
| 8016 | Kornowski et al., | 2000 | Seminars in<br>interventional<br>cardiology : SIIC.<br>2000; 5(2):97-101    | non pertinent |
| 8017 | Kokki et al.,     | 2000 | British j of<br>anaesthesia. 2000;<br>85(6):836-840                         | non pertinent |
| 8018 | Kjeldsen et al.,  | 2000 | J of hypertension.<br>2000; 18(5):629-<br>642                               | non pertinent |
| 8019 | Kaufmann et al.,  | 2000 | J of clinical<br>oncology. 2000;<br>18(7):1399-1411                         | non pertinent |
| 8020 | Karasawa et al.,  | 2000 | J of anesthesia.<br>2000; 14(3):135-<br>137                                 | non pertinent |
| 8021 | Kanda et al.,     | 2000 | Brain research.<br>2000; 853(2):282-<br>289                                 | non pertinent |
| 8022 | Kain et al.,      | 2000 | Anesthesiology.<br>2000; 93(1):141-<br>147                                  | non pertinent |
| 8023 | Kahirlas et al.,  | 2000 | Alimentary<br>pharmacology &<br>therapeutics.<br>2000; 14(10):1249-<br>1258 | non pertinent |
| 8024 | Jones et al.,     | 2000 | Anaesthesia and<br>intensive care.<br>2000; 28(5):491-<br>500               | non pertinent |
| 8025 | Jayousi           | 2000 | Saudi medical j.<br>2000; 21(11):1071-<br>1073                              | non pertinent |
| 8026 | Humphreys et al., | 2000 | J of pediatric<br>gastroenterology<br>and nutrition.<br>2000; 31(1):47-51   | non pertinent |
| 8027 | Homma et al.,     | 2000 | Dementia and<br>geriatric cognitive<br>disorders. 2000;<br>11(6):299-313    | non pertinent |
| 8028 | Hombrink et al.,  | 2000 | Strahlentherapie<br>und Onkologie.<br>2000; 176(4):173-<br>179              | non pertinent |
| 8029 | Hofman et al.,    | 2000 | Prensa medica<br>argentina. 2000;<br>87(5):513-520                          | non pertinent |
| 8030 | Hill et al.,      | 2000 | Psychopharmacol<br>ogy. 2000;<br>152(1):31-39                               | non pertinent |
| 8031 | Hawkey et al.,    | 2000 | Arthritis and<br>rheumatism.<br>2000; 43(2):370-                            | non pertinent |
| 8032 | Hariri et al.,    | 2000 | Neuroreport.<br>2000; 11(1):43-48                                           | non pertinent |
| 8033 | Hanly et al.,     | 2000 | J of rheumatology.<br>2000; 27(3):719-<br>722                               | non pertinent |



|      |                    |      |                                                                           |               |
|------|--------------------|------|---------------------------------------------------------------------------|---------------|
| 8034 | Hadhazy et al.,    | 2000 | J of rheumatology. 2000; 27(12):2911-2918                                 | non pertinent |
| 8035 | Guignard et al.,   | 2000 | Anesth Analg. 2000; 90(1):161-167                                         | non pertinent |
| 8036 | Green et al.,      | 2000 | Physiol Behav. 2000; 68(5):631-639                                        | non pertinent |
| 8037 | Grahame            | 2000 | Joint, bone, spine. 2000; 67(3):157-163                                   | non pertinent |
| 8038 | Gehanno et al.,    | 2000 | Scandinavian j of infectious diseases. 2000; 32(6):679-684                | non pertinent |
| 8039 | Furst et al.,      | 2000 | Therapeutic apheresis. 2000; 4(5):363-373                                 | non pertinent |
| 8040 | Fujioka et al.,    | 2000 | Diabetes, obesity & metabolism. 2000; 2(3):175-187                        | non pertinent |
| 8041 | Frenck et al.,     | 2000 | Clinical infectious diseases. 2000; 31(5):1134-1138                       | non pertinent |
| 8042 | Franke et al.,     | 2000 | Rheumatology. 2000; 39(8):894-902                                         | non pertinent |
| 8043 | Fogelman et al.,   | 2000 | J of clinical endocrinology and metabolism. 2000; 85(5):1895-1900         | non pertinent |
| 8044 | Fock et al.,       | 2000 | Alimentary pharmacology & therapeutics. 2000; 14(2):225-231               | non pertinent |
| 8045 | File et al.,       | 2000 | J of chemotherapy (florence, italy). 2000; 12(4):314-325                  | non pertinent |
| 8046 | Farber et al.,     | 2000 | Scandinavian j of rheumatology, supplement. 2000; 29(113):49-54           | non pertinent |
| 8047 | El Saied et al.,   | 2000 | J canadien d'anesthesie (Canadian j of anaesthesia). 2000; 47(10):962-967 | non pertinent |
| 8048 | Edmondston et al., | 2000 | Man Ther. 2000; 5(3):158-164                                              | non pertinent |
| 8049 | Drummond           | 2000 | Anesthesia and Analgesia. 2000; 90(4):923-927                             | non pertinent |
| 8050 | Dormandy           | 2000 | European j of vascular and endovascular surgery. 2000; 20(4):358-362      | non pertinent |

|      |                      |      |                                                                                                                       |               |
|------|----------------------|------|-----------------------------------------------------------------------------------------------------------------------|---------------|
| 8051 | Diamond et al.,      | 2000 | Cephalalgia. 2000; 20(6):597-602                                                                                      | non pertinent |
| 8052 | Desbiens et al.,     | 2000 | J of the American Geriatrics Society. 2000; 48(1):183-186                                                             | non pertinent |
| 8053 | Delchier et al.,     | 2000 | Scandinavian j of gastroenterology. 2000; 35(12):1245-1250                                                            | non pertinent |
| 8054 | DeAbate et al.,      | 2000 | Respiratory medicine. 2000; 94(11):1029-1037                                                                          | non pertinent |
| 8055 | De Deyne et al.,     | 2000 | J Clin Anesth. 2000; 12(1):52-57                                                                                      | non pertinent |
| 8056 | Davis et al.,        | 2000 | J Neurophysiol. 2000; 83(6):3575-3577                                                                                 | non pertinent |
| 8057 | Craig et al.,        | 2000 | Nat Neurosci. 2000; 3(2):184-190                                                                                      | non pertinent |
| 8058 | Chung et al.,        | 2000 | Acta anaesthesiologica Scandinavica. 2000; 44(7):790-798                                                              | non pertinent |
| 8059 | Christiansen et al., | 2000 | Cephalalgia. 2000; 20(5):437-444                                                                                      | non pertinent |
| 8060 | Chiaretti et al.,    | 2000 | Child's nervous system : chns : official j of the international society for pediatric neurosurgery. 2000; 16(2):93-99 | non pertinent |
| 8061 | Castro et al.,       | 2000 | Revista de la sociedad espanola del dolor. 2000; 7(1):12-16                                                           | non pertinent |
| 8062 | Casey et al.,        | 2000 | J of neurophysiology. 2000; 84(1):525-533                                                                             | non pertinent |
| 8063 | Carragee et al.,     | 2000 | Spine (Phila Pa 1976). 2000; 25(23):3065-3071                                                                         | non pertinent |
| 8064 | Cameron et al.,      | 2000 | Spine (Phila Pa 1976). 2000; 25(15):1917-1924                                                                         | non pertinent |
| 8065 | Calaluce et al.,     | 2000 | Cancer epidemiology, biomarkers & prevention. 2000; 9(12):1287-1292                                                   | non pertinent |
| 8066 | Cady et al.,         | 2000 | Clinical therapeutics. 2000; 22(9):1035-1048                                                                          | non pertinent |
| 8067 | Buchner et al.,      | 2000 | Neuroreport. 2000; 11(6):1289-1293                                                                                    | non pertinent |

|      |                    |      |                                                                             |               |
|------|--------------------|------|-----------------------------------------------------------------------------|---------------|
| 8068 | Bradwejn et al.,   | 2000 | J of clinical psychopharmacology. 2000; 20(6):680-684                       | non pertinent |
| 8069 | Boon et al.,       | 2000 | Clinical therapeutics. 2000; 22(1):76-90                                    | non pertinent |
| 8070 | Bonk et al.,       | 2000 | J of musculoskeletal pain. 2000; 8(1-2):123-132                             | non pertinent |
| 8071 | Bonina et al.,     | 2000 | J of pharmacy and pharmacology. 2000; 52(10):1279-1285                      | non pertinent |
| 8072 | Blomhoff et al.,   | 2000 | Scand J Gastroenterol. 2000; 35(6):583-589                                  | non pertinent |
| 8073 | Bendtsen et al.,   | 2000 | Cephalalgia. 2000; 20(6):603-610                                            | non pertinent |
| 8074 | Azad et al.,       | 2000 | Bangladesh medical research council bulletin. 2000; 26(2):41-47             | non pertinent |
| 8075 | Ashina et al.,     | 2000 | Ugeskrift for laeger. 2000; 162(2):171-173                                  | non pertinent |
| 8076 | Apkarian et al.,   | 2000 | J Neurophysiol. 2000; 83(5):3113-3122                                       | non pertinent |
| 8077 | Angst et al.,      | 2000 | Anesthesiology. 2000; 92(2):312-324                                         | non pertinent |
| 8078 | Abouleish et al.,  | 2000 | J canadien d'anesthesie (Canadian j of anaesthesia). 2000; 47(12):1171-1175 | non pertinent |
| 8079 | Zullo et al.,      | 1999 | Italian j of gastroenterology and hepatology. 1999; 31(9):831-835           | non pertinent |
| 8080 | Zanten et al.,     | 1999 | Alimentary pharmacology & therapeutics. 1999; 13(3):289-295                 | non pertinent |
| 8081 | Ylikorkala et al., | 1999 | Revista brasileira de medicina. 1999; 56(10):1042-1047                      | non pertinent |
| 8082 | Wulsin et al.,     | 1999 | International j of psychiatry in medicine. 1999; 29(1):97-105               | non pertinent |
| 8083 | Wu et al.,         | 1999 | Radiology. 1999; 212(1):133-141                                             | non pertinent |

|      |                         |      |                                                                             |               |
|------|-------------------------|------|-----------------------------------------------------------------------------|---------------|
| 8084 | Woodman                 | 1999 | Obstetrics and<br>gynecology. 1999;<br>93(5 Pt 1):775-<br>779               | non pertinent |
| 8085 | Wong et al.,            | 1999 | Addiction<br>(Abingdon,<br>England). 1999;<br>94(8):1227-1237               | non pertinent |
| 8086 | Winblad et al.,         | 1999 | International j of<br>geriatric<br>psychiatry. 1999;<br>14(2):135-146       | non pertinent |
| 8087 | Wilder-Smith et<br>al., | 1999 | British j of<br>anaesthesia. 1999;<br>83(4):590-595                         | non pertinent |
| 8088 | Wakakura et al.,        | 1999 | Jpn J Ophthalmol.<br>1999; 43(2):127-<br>132                                | non pertinent |
| 8089 | Valenzuela et al.,      | 1999 | Anesth Analg.<br>1999; 88(5):1107-<br>1108                                  | non pertinent |
| 8090 | Tajti et al.,           | 1999 | Neurobiology<br>(budapest,<br>hungary). 1999;<br>7(2):103-108               | non pertinent |
| 8091 | Suri et al.,            | 1999 | Clinical<br>pharmacokinetics.<br>1999; 37(SUPPL<br>2):61-68                 | non pertinent |
| 8092 | Stein et al.,           | 1999 | Pain. 1999;<br>83(3):525-532                                                | non pertinent |
| 8093 | Staszewski et al.,      | 1999 | International j of<br>clinical practice.<br>Supplement. 1999;<br>103:10-15  | non pertinent |
| 8094 | Sramek et al.,          | 1999 | Clinical drug<br>investigation.<br>1999; 17(2):137-<br>144                  | non pertinent |
| 8095 | Spruance et al.,        | 1999 | J of infectious<br>diseases. 1999;<br>179(2):303-310                        | non pertinent |
| 8096 | Smith et al.,           | 1999 | J of<br>psychopharmacol<br>ogy (Oxford,<br>England). 1999;<br>13(2):148-151 | non pertinent |
| 8097 | Segerstrom et al.,      | 1999 | Brain Behav<br>Immun. 1999;<br>13(2):80-92                                  | non pertinent |
| 8098 | Sechter et al.,         | 1999 | European<br>psychiatry. 1999;<br>14(1):41-48                                | non pertinent |
| 8099 | Schuitmaker et<br>al.,  | 1999 | Anaesthesia and<br>intensive care.<br>1999; 27(6):615-<br>622               | non pertinent |
| 8100 | Schnitzer et al.,       | 1999 | Clinical<br>therapeutics.<br>1999; 21(10):1688-<br>1702                     | non pertinent |
| 8101 | Schmitz et al.,         | 1999 | Hernia. 1999;<br>3(3):125-129                                               | non pertinent |
| 8102 | Schaffler et al.,       | 1999 | Arzneimittelforsc<br>hung. 1999;<br>49(4):374-379                           | non pertinent |

|      |                   |      |                                                                         |               |
|------|-------------------|------|-------------------------------------------------------------------------|---------------|
| 8103 | Salminen et al.,  | 1999 | Spine (Phila Pa 1976). 1999; 24(13):1316-1321                           | non pertinent |
| 8104 | Sakai et al.,     | 1999 | Acta Anaesthesiol Scand. 1999; 43(2):212-216                            | non pertinent |
| 8105 | Rossi et al.,     | 1999 | Brain Res. 1999; 818(1):12-22                                           | non pertinent |
| 8106 | Rosen et al.,     | 1999 | J Cardiovasc Pharmacol. 1999; 34(4):554-560                             | non pertinent |
| 8107 | Radanov et al.,   | 1999 | J Neurol Neurosurg Psychiatry. 1999; 66(4):485-489                      | non pertinent |
| 8108 | Rabben et al.,    | 1999 | J of pharmacology and experimental therapeutics. 1999; 289(2):1060-1066 | non pertinent |
| 8109 | Ploghaus et al.,  | 1999 | Science. 1999; 284(5422):1979-1981                                      | non pertinent |
| 8110 | Pivik et al.,     | 1999 | Sleep Res Online. 1999; 2(4):89-100                                     | non pertinent |
| 8111 | Pisegna et al.,   | 1999 | American j of gastroenterology. 1999; 94(10):2874-2880                  | non pertinent |
| 8112 | Peichl et al.,    | 1999 | Gynecological endocrinology. 1999; 13(1):7-14                           | non pertinent |
| 8113 | Pauli et al.,     | 1999 | Pain. 1999; 80(1-2):359-364                                             | non pertinent |
| 8114 | Patel et al.,     | 1999 | European heart j. 1999; 20(1):51-57                                     | non pertinent |
| 8115 | Patat et al.,     | 1999 | Fundam Clin Pharmacol. 1999; 13(5):582-594                              | non pertinent |
| 8116 | Papa et al.,      | 1999 | Academic medicine. 1999; 74(10 Suppl):16-18                             | non pertinent |
| 8117 | Overgaard et al., | 1999 | Biol Neonate. 1999; 75(5):279-284                                       | non pertinent |
| 8118 | Orhan et al.,     | 1999 | Experimental and toxicologic pathology. 1999; 51(4-5):403-408           | non pertinent |
| 8119 | Nichols et al.,   | 1999 | J of antimicrobial chemotherapy. 1999; 44(2):263-273                    | non pertinent |
| 8120 | Muller et al.,    | 1999 | Hormone research. 1999; 51(SUPPL 3):109-112                             | non pertinent |
| 8121 | Mossner           | 1999 | Surgical clinics of north america. 1999; 79(4):861-872                  | non pertinent |
| 8122 | Morley et al.,    | 1999 | Pain. 1999; 80(1-2):1-13                                                | non pertinent |

|      |                     |      |                                                                                        |               |
|------|---------------------|------|----------------------------------------------------------------------------------------|---------------|
| 8123 | Monnerat et al.,    | 1999 | Praxis. 1999; 88(5):178-188                                                            | non pertinent |
| 8124 | Metaxotos et al.,   | 1999 | British j of plastic surgery. 1999; 52(4):290-293                                      | non pertinent |
| 8125 | Mahaffey et al.,    | 1999 | Circulation. 1999; 99(18):2371-2377                                                    | non pertinent |
| 8126 | MacIsaac et al.,    | 1999 | Obstetrics and gynecology. 1999; 93(5 Pt 1):766-770                                    | non pertinent |
| 8127 | Loose et al.,       | 1999 | Neurogastroenterol Motil. 1999; 11(3):163-171                                          | non pertinent |
| 8128 | Liu et al.,         | 1999 | Anesthesiology. 1999; 90(3):727-733                                                    | non pertinent |
| 8129 | List et al.,        | 1999 | J Clin Oncol. 1999; 17(3):1020-1028                                                    | non pertinent |
| 8130 | Liénard et al.,     | 1999 | Melanoma research. 1999; 9(5):491-502                                                  | non pertinent |
| 8131 | Lentz et al.,       | 1999 | J Rheumatol. 1999; 26(7):1586-1592                                                     | non pertinent |
| 8132 | Lee                 | 1999 | Epilepsia. 1999; 40(12):1767-1774                                                      | non pertinent |
| 8133 | Lebovits et al.,    | 1999 | Br J Anaesth. 1999; 82(6):861-866                                                      | non pertinent |
| 8134 | Lauritsen et al.,   | 1999 | J canadien de gastroenterologie (Canadian j of gastroenterology). 1999; 13(10):806-813 | non pertinent |
| 8135 | Kurtis et al.,      | 1999 | Pediatrics. 1999; 103(2):E23                                                           | non pertinent |
| 8136 | Koswig et al.,      | 1999 | Strahlentherapie und Onkologie. 1999; 175(10):500-508                                  | non pertinent |
| 9137 | Knost et al.,       | 1999 | Psychophysiology. 1999; 36(6):755-764                                                  | non pertinent |
| 8138 | Kaminester et al.,  | 1999 | J of the American Academy of Dermatology. 1999; 41(6):996-1001                         | non pertinent |
| 8139 | Jones et al.,       | 1999 | British j of general practice. 1999; 49(438):39-41                                     | non pertinent |
| 8140 | Janiszewski et al., | 1999 | Anesthesia and Analgesia. 1999; 88(5):1149-1154                                        | non pertinent |
| 8141 | Jain et al.,        | 1999 | Contraception. 1999; 60(6):353-356                                                     | non pertinent |
| 8142 | Howard et al.,      | 1999 | American j of obstetrics and gynecology. 1999; 181(6):1506-1511                        | non pertinent |

|      |                       |      |                                                             |               |
|------|-----------------------|------|-------------------------------------------------------------|---------------|
| 8143 | Holas et al.,         | 1999 | European j of anaesthesiology. 1999; 16(11):741-748         | non pertinent |
| 8144 | Hirota et al.,        | 1999 | Eur J Anaesthesiol. 1999; 16(8):516-518                     | non pertinent |
| 8145 | Heeschen et al.,      | 1999 | Lancet. 1999; 354(9192):1757-1762                           | non pertinent |
| 8146 | Haubrich et al.,      | 1999 | AIDS (london, england). 1999; 13(17):2411-2420              | non pertinent |
| 8147 | Harms et al.,         | 1999 | Fetal diagnosis and therapy. 1999; 14(6):368-374            | non pertinent |
| 8148 | Harker et al.,        | 1999 | Drug safety. 1999; 21(4):325-335                            | non pertinent |
| 8149 | Grillon et al.,       | 1999 | Int J Psychophysiology. 1999; 32(1):63-73                   | non pertinent |
| 8150 | Goldenberg            | 1999 | Clinical therapeutics. 1999; 21(2):309-318                  | non pertinent |
| 8151 | Gautier et al.,       | 1999 | Am J Clin Nutr. 1999; 70(5):806-810                         | non pertinent |
| 8152 | Garcia-Larrea et al., | 1999 | Pain. 1999; 83(2):259-273                                   | non pertinent |
| 8153 | Fullerton et al.,     | 1999 | J Clin Pharmacol. 1999; 39(1):17-29                         | non pertinent |
| 8154 | Fukumoto et al.,      | 1999 | Lancet (london, england). 1999; 354(9192):1790-1791         | non pertinent |
| 8155 | Fredman et al.,       | 1999 | J of clinical anesthesia. 1999; 11(8):635-640               | non pertinent |
| 8156 | Ettinger et al.,      | 1999 | J of the american medical association. 1999; 282(7):637-645 | non pertinent |
| 8157 | Emery et al.,         | 1999 | Lancet (london, england). 1999; 354(9196):2106-2111         | non pertinent |
| 8158 | Elie et al.,          | 1999 | J of clinical psychiatry. 1999; 60(8):536-544               | non pertinent |
| 8159 | Ehrich et al.,        | 1999 | J of rheumatology. 1999; 26(11):2438-2447                   | non pertinent |
| 8160 | Dziadzio et al.,      | 1999 | Arthritis and rheumatism. 1999; 42(12):2646-                | non pertinent |
| 8161 | Doyle et al.,         | 1999 | Alimentary pharmacology & therapeutics. 1999; 13(7):897-906 | non pertinent |

|      |                       |      |                                                                                               |               |
|------|-----------------------|------|-----------------------------------------------------------------------------------------------|---------------|
| 8162 | Dell'Anna et al.,     | 1999 | European review<br>for medical and<br>pharmacological<br>sciences. 1999;<br>3(3):105-110      | non pertinent |
| 8163 | De Wit et al.,        | 1999 | J of international<br>medical research.<br>1999; 27(5):223-<br>232                            | non pertinent |
| 8164 | De Gelder et al.,     | 1999 | Neuroreport.<br>1999; 10(18):3759-<br>3763                                                    | non pertinent |
| 7165 | Cunningham et<br>al., | 1999 | Seminars in<br>oncology. 1999;<br>26(1 SUPPL 5):6-<br>12                                      | non pertinent |
| 8166 | Cooper et al.,        | 1999 | Osteoporosis<br>international.<br>1999; 9(4):358-<br>366                                      | non pertinent |
| 8167 | Casati et al.,        | 1999 | European j of<br>anaesthesiology.<br>1999; 16(11):784-<br>789                                 | non pertinent |
| 8168 | Casati et al.,        | 1999 | Anesthesiology.<br>1999; 90(4):1047-<br>1052                                                  | non pertinent |
| 8169 | Carreno et al.,       | 1999 | Hepatology<br>(baltimore, md.).<br>1999; 30(1):277-<br>282                                    | non pertinent |
| 8170 | Calabrese et al.,     | 1999 | J of clinical<br>psychiatry. 1999;<br>60(2):79-88                                             | non pertinent |
| 8171 | Burke et al.,         | 1999 | Clinical<br>therapeutics.<br>1999; 21(10):1664-<br>1677                                       | non pertinent |
| 8172 | Bultmann et al.,      | 1999 | Der Anaesthesist.<br>1999; 48(7):439-<br>443                                                  | non pertinent |
| 8173 | Brenner et al.,       | 1999 | European j of<br>applied physiology<br>and occupational<br>physiology. 1999;<br>80(5):452-460 | non pertinent |
| 8174 | Breen et al.,         | 1999 | International j of<br>obstetric<br>anesthesia. 1999;<br>8(4):226-230                          | non pertinent |
| 8175 | Bramer et al.,        | 1999 | Clinical<br>pharmacokinetics.<br>1999; 37 Suppl<br>2:41-51                                    | non pertinent |
| 8176 | Bramer et al.,        | 1999 | Clinical<br>pharmacokinetics.<br>1999; 37 Suppl 2:1-<br>11                                    | non pertinent |
| 8177 | Biswas et al.,        | 1999 | Eye (london,<br>england). 1999;<br>13(4):537-540                                              | non pertinent |
| 8178 | Benedetti et al.,     | 1999 | Pain. 1999; 80(1-<br>2):377-382                                                               | non pertinent |



|      |                     |      |                                                            |               |
|------|---------------------|------|------------------------------------------------------------|---------------|
| 8179 | Benedetti et al.,   | 1999 | J of neuroscience.<br>1999; 19(9):3639-3648                | non pertinent |
| 8180 | Benedetti et al.,   | 1999 | European j of neuroscience.<br>1999; 11(2):625-631         | non pertinent |
| 8181 | Ben-Ari et al.,     | 1999 | J Pers Soc Psychol. 1999;<br>76(1):35-45                   | non pertinent |
| 8182 | Baird et al.,       | 1999 | J Am Acad Child Adolesc Psychiatry. 1999;<br>38(2):195-199 | non pertinent |
| 8183 | Atanassoff et al.,  | 1999 | Somatosens Mot Res. 1999;<br>16(4):291-298                 | non pertinent |
| 8184 | Apkarian et al.,    | 1999 | J Neurophysiol. 1999; 81(6):2956-2963                      | non pertinent |
| 8185 | Antonicelli et al., | 1999 | American j of medicine. 1999;<br>107(3):234-239            | non pertinent |
| 8186 | Alvarez et al.,     | 1999 | Prensa medica argentina. 1999;<br>86(7):698-705            | non pertinent |
| 8187 | Albrecht et al.,    | 1999 | Der Anaesthesist. 1999; 48(11):794-801                     | non pertinent |
| 8188 | Agid et al.,        | 1999 | Movement disorders. 1999;<br>14(1):38-44                   | non pertinent |
| 8189 | Adolf et al.,       | 1999 | International angiology. 1999;<br>18(2):122-126            | non pertinent |
| 8190 | Thimineur et al.,   | 1998 | Clin J Pain. 1998;<br>14(3):256-267                        | non pertinent |
| 8191 | Terrell et al.,     | 1998 | Arch Otolaryngol Head Neck Surg. 1998; 124(9):964-971      | non pertinent |
| 8192 | Srivastava et al.,  | 1998 | Clinical cancer research. 1998;<br>4(1):61-68              | non pertinent |
| 8193 | Spencer et al.,     | 1998 | British j of radiology. 1998;<br>71(851):1130-1135         | non pertinent |
| 8194 | Song et al.,        | 1998 | Anesth Analg. 1998; 87(6):1245-1248                        | non pertinent |
| 8195 | Silverst et al.,    | 1998 | Clinical therapeutics. 1998; 20(3):438-453                 | non pertinent |
| 8196 | Serour et al.,      | 1998 | Acta anaesthesiologica Scandinavica. 1998; 42(2):260-263   | non pertinent |
| 8197 | Sellick et al.,     | 1998 | Cancer prevention and control. 1998;<br>2(1):7-14          | non pertinent |

|      |                      |      |                                                                                |               |
|------|----------------------|------|--------------------------------------------------------------------------------|---------------|
| 8198 | Saito et al.,        | 1998 | International j of immunotherapy. 1998; 14(2):115-128                          | non pertinent |
| 8199 | Rampil et al.,       | 1998 | Anesthesiology. 1998; 89(3):671-677                                            | non pertinent |
| 8200 | Porro et al.,        | 1998 | J of neurophysiology. 1998; 80(6):3312-3320                                    | non pertinent |
| 8201 | Pippi Salle et al.,  | 1998 | J Urol. 1998; 160(3 Pt 2):1080-1083                                            | non pertinent |
| 8202 | Ping et al.,         | 1998 | Chinese j of antibiotics. 1998; 23(4):315-318                                  | non pertinent |
| 8203 | Peduto et al.,       | 1998 | Acta anaesthesiologica Scandinavica. 1998; 42(3):293-298                       | non pertinent |
| 8204 | Payne et al.,        | 1998 | J Clin Oncol. 1998; 16(4):1588-1593                                            | non pertinent |
| 8205 | Paulson et al.,      | 1998 | Pain. 1998; 76(1-2):223-229                                                    | non pertinent |
| 8206 | Oshiro et al.,       | 1998 | Neuroreport. 1998; 9(10):2285-2289                                             | non pertinent |
| 8207 | Olausson             | 1998 | Exp Brain Res. 1998; 122(1):44-54                                              | non pertinent |
| 8208 | Okhuysen et al.,     | 1998 | Clinical infectious diseases. 1998; 26(6):1324-1329                            | non pertinent |
| 8209 | Nishiyama et al.,    | 1998 | J canadien d'anesthesie (Canadian j of anaesthesia). 1998; 45(6):551-555       | non pertinent |
| 8210 | Netzer et al.,       | 1998 | Alimentary pharmacology & therapeutics. 1998; 12(4):337-342                    | non pertinent |
| 8211 | Muller et al.,       | 1998 | Arzneimittelforschung/drug research. 1998; 48(6):675-679                       | non pertinent |
| 8212 | Michalski            | 1998 | Acta Neurobiol Exp (Wars). 1998; 58(1):55-64                                   | non pertinent |
| 8213 | May et al.,          | 1998 | Pain. 1998; 74(1):61-66                                                        | non pertinent |
| 8214 | Malaguarnera et al., | 1998 | International j of clinical pharmacology and therapeutics. 1998; 36(8):441-445 | non pertinent |
| 8215 | Lotsch et al.,       | 1998 | Chem Senses. 1998; 23(6):755-759                                               | non pertinent |

|      |                       |      |                                                                         |               |
|------|-----------------------|------|-------------------------------------------------------------------------|---------------|
| 8216 | Lorenz et al.,        | 1998 | Neuroreport.<br>1998; 9(2):187-191                                      | non pertinent |
| 8217 | Kondziolka et al.,    | 1998 | Arch Neurol. 1998;<br>55(12):1524-1529                                  | non pertinent |
| 8218 | Jones et al.,         | 1998 | Human<br>psychopharmacol<br>ogy. 1998;<br>13(1):35-42                   | non pertinent |
| 8219 | Iselin-Chaves et al., | 1998 | Anesthesia and<br>Analgesia. 1998;<br>87(4):949-955                     | non pertinent |
| 8220 | Iadarola et al.,      | 1998 | Brain. 1998;<br>121(Pt 5):931-947                                       | non pertinent |
| 8221 | Hauser et al.,        | 1998 | Movement<br>disorders. 1998;<br>13(4):643-647                           | non pertinent |
| 8222 | Grillon et al.,       | 1998 | Int J<br>Psychophysiol.<br>1998; 28(3):223-231                          | non pertinent |
| 8223 | Green et al.,         | 1998 | Somatosens Mot<br>Res. 1998;<br>15(4):269-275                           | non pertinent |
| 8224 | Goodarzi              | 1998 | Paediatr Anaesth.<br>1998; 8(2):131-134                                 | non pertinent |
| 8225 | Gill et al.,          | 1998 | Spine (Phila P<br>1976). 1998;<br>23(3):371-377                         | non pertinent |
| 8226 | Furuya et al.,        | 1998 | J Neurol Neurosurg<br>Psychiatry. 1998;<br>64(2):221-226                | non pertinent |
| 8227 | Fu et al.,            | 1998 | Anesthesia and<br>Analgesia. 1998;<br>86(5):1127-1130                   | non pertinent |
| 8228 | Drewes et al.,        | 1998 | Scand J<br>Rheumatol. 1998;<br>27(3):180-187                            | non pertinent |
| 8229 | Disbrow et al.,       | 1998 | Hum Brain Mapp.<br>1998; 6(3):150-159                                   | non pertinent |
| 8230 | Cunningham            | 1998 | British j of cancer.<br>1998; 77(SUPPL<br>2):15-21                      | non pertinent |
| 8231 | Coetzee et al.,       | 1998 | Br J Anaesth.<br>1998; 81(5):737-741                                    | non pertinent |
| 8232 | Choi et al.,          | 1998 | Korean j of<br>anesthesiology.<br>1998; 34(2):353-358                   | non pertinent |
| 8233 | Chey et al.,          | 1998 | Alimentary<br>pharmacology &<br>therapeutics.<br>1998; 12(12):1263-1267 | non pertinent |
| 8234 | Carpentier et al.,    | 1998 | J des maladies<br>vasculaires. 1998;<br>23(2):106-112                   | non pertinent |

|      |                         |      |                                                                                         |               |
|------|-------------------------|------|-----------------------------------------------------------------------------------------|---------------|
| 8235 | Carling et al.,         | 1998 | Alimentary pharmacology & therapeutics. 1998; 12(10):985-990                            | non pertinent |
| 8236 | Brough et al.,          | 1998 | European j of nuclear medicine. 1998; 25(11):1520-1523                                  | non pertinent |
| 8237 | Boneau et al.,          | 1998 | Thrombosis and haemostasis. 1998; 79(2):338-341                                         | non pertinent |
| 8238 | Bjorneboe et al.,       | 1998 | Scandinavian j of rheumatology. 1998; 27(1):26-31                                       | non pertinent |
| 8239 | Bischoff et al.,        | 1998 | Anesthesiologie, Intensivmedizin, Notfallmedizin, Schmerztherapie. 1998; 33(2):88-95    | non pertinent |
| 8240 | Bessette et al.,        | 1998 | Scandinavian j of rheumatology. 1998; 27(2):112-116                                     | non pertinent |
| 8241 | Balderston et al.,      | 1998 | Spine (Phila Pa 1976). 1998; 23(1):54-58                                                | non pertinent |
| 8242 | Williams et al.,        | 1997 | Clinical radiology. 1997; 52(1):46-49                                                   | non pertinent |
| 8243 | Van Tulder et al.,      | 1997 | Spine. 1997; 22(18):2128-2156                                                           | non pertinent |
| 8244 | Svensson et al.,        | 1997 | J Neurophysiol. 1997; 78(1):450-460                                                     | non pertinent |
| 8245 | Sinczuk-Walczak et al., | 1997 | International j of occupational medicine and environmental health. 1997; 10(4):429-440  | non pertinent |
| 8246 | Sengoku et al.,         | 1997 | Psychiatry Clin Neurosci. 1997; 51(1):23-26                                             | non pertinent |
| 8247 | Schüttler et al.,       | 1997 | Anaesthesia. 1997; 52(4):307-317                                                        | non pertinent |
| 8248 | Sandman et al.,         | 1997 | Am J Ment Retard. 1997; 102(2):182-199                                                  | non pertinent |
| 8249 | Rundshagen et al.,      | 1997 | Anesthesiologie, Intensivmedizin, Notfallmedizin, Schmerztherapie. 1997; 32(10):604-609 | non pertinent |
| 8250 | Romero Ganuza et al.,   | 1997 | Spinal Cord. 1997; 35(2):124-128                                                        | non pertinent |
| 8251 | Rizzato et al.,         | 1997 | Respiratory medicine. 1997; 91(8):449-460                                               | non pertinent |
| 8252 | Pinto et al.,           | 1997 | J of aging and physical activity. 1997; 5(4):311-328                                    | non pertinent |

|      |                    |      |                                                                                      |               |
|------|--------------------|------|--------------------------------------------------------------------------------------|---------------|
| 8253 | Persson et al.,    | 1997 | Eur Spine J. 1997;<br>6(4):256-266                                                   | non pertinent |
| 8254 | Perlis et al.,     | 1997 | Int J Neurosci.<br>1997; 89(3-4):265-<br>280                                         | non pertinent |
| 8255 | Motsch et al.,     | 1997 | Acta<br>anaesthesiologica<br>Scandinavica.<br>1997; 41(7):877-<br>883                | non pertinent |
| 8256 | Mjahed et al.,     | 1997 | Annales francaises<br>d'anesthesie ET<br>de reanimation.<br>1997; 16(5):488-<br>491  | non pertinent |
| 8257 | Matsushima et al., | 1997 | Biol Psychiatry.<br>1997; 41(12):1211-<br>1217                                       | non pertinent |
| 8258 | Lukins et al.,     | 1997 | J Behav Ther Exp<br>Psychiatry. 1997;<br>28(2):97-104                                | non pertinent |
| 8259 | Lotsch et al.,     | 1997 | Eur J CLin<br>Pharmacol. 1997;<br>52(5):359-364                                      | non pertinent |
| 8260 | Loo et al.,        | 1997 | Annals of the<br>academy of<br>medicine<br>singapore. 1997;<br>26(2):200-204         | non pertinent |
| 8261 | Likar et al.,      | 1997 | Der Anaesthetist.<br>1997; 46(3):186-<br>190                                         | non pertinent |
| 8262 | Li et al.,         | 1997 | IOVS. 1997;<br>38:ARVO Abstract<br>4515                                              | non pertinent |
| 8263 | Lewis et al.,      | 1997 | Neurology. 1997;<br>48(6):1542-1550                                                  | non pertinent |
| 8264 | Lerman et al.,     | 1997 | Health<br>psychology. 1997;<br>16(1):87-99                                           | non pertinent |
| 8265 | Kosuge et al.,     | 1997 | Br J Clin<br>Pharmacol. 1997;<br>43(4):367-372                                       | non pertinent |
| 8266 | Knott et al.,      | 1997 | J Anxiety Disord.<br>1997; 11(4):365-<br>376                                         | non pertinent |
| 8267 | Jarvik et al.,     | 1997 | Radiology. 1997;<br>204(2):447-454                                                   | non pertinent |
| 8268 | Hummel et al.,     | 1997 | European j of<br>clinical<br>pharmacology.<br>1997; 52(2):107-<br>114                | non pertinent |
| 8269 | Herrick et al.,    | 1997 | Anesth Analg.<br>1997; 84(6):1285-<br>1291                                           | non pertinent |
| 8270 | Harte et al.,      | 1997 | J Paediatr Child<br>Health. 1997;<br>33(4):335-338                                   | non pertinent |
| 8271 | Gutierrez et al.,  | 1997 | Abstract<br>book/association<br>for health services<br>research. 1997;<br>14:105-106 | non pertinent |

|      |                          |      |                                                          |               |
|------|--------------------------|------|----------------------------------------------------------|---------------|
| 8272 | Grillon et al.,          | 1997 | Psychophysiology.<br>1997; 34(5):511-517                 | non pertinent |
| 8273 | Greenspan et al.,        | 1997 | Pain. 1997; 72(1-2):13-25                                | non pertinent |
| 8274 | Grant et al.,            | 1997 | Pharmacotherapy . 1997; 17(2):333-341                    | non pertinent |
| 8275 | Gobel et al.,            | 1997 | Drugs. 1997; 53(SUPPL 2):34-39                           | non pertinent |
| 8276 | Garcia-Losa              | 1997 | Medicina clinica. 1997; 109(4):130-134                   | non pertinent |
| 8277 | Garcia et al.,           | 1997 | Fundamental & clinical pharmacology. 1997; 11(5):466-475 | non pertinent |
| 8278 | Furmark et al.,          | 1997 | Neuroreport. 1997; 8(18):3957-3960                       | non pertinent |
| 8279 | Freeborn et al.,         | 1997 | J Gen Intern Med. 1997; 12(10):619-625                   | non pertinent |
| 8280 | Flor et al.,             | 1997 | Pain. 1997; 73(3):413-421                                | non pertinent |
| 8281 | Fleischmann et al.,      | 1997 | Clinical therapeutics. 1997; 19(4):642-655               | non pertinent |
| 8282 | Ellich et al.,           | 1997 | Brain Res. 1997; 764(1-2):214-220                        | non pertinent |
| 8283 | Eisenach et al.,         | 1997 | Anesthesiology. 1997; 86(6):1279-1287                    | non pertinent |
| 8284 | Doenicke et al.,         | 1997 | Anesth Analg. 1997; 85(6):1399-1403                      | non pertinent |
| 8285 | Derbyshire et al.,       | 1997 | Pain. 1997; 73(3):431-445                                | non pertinent |
| 8286 | Chareonthaitawee et al., | 1997 | American heart j. 1997; 134(4):639-646                   | non pertinent |
| 8287 | Cannoni et al.,          | 1997 | Medecine ET maladies infectieuses. 1997; 27(11):915-921  | non pertinent |
| 8288 | Buzelin et al.,          | 1997 | British j of urology. 1997; 80(4):597-605                | non pertinent |
| 8289 | Bono et al.,             | 1997 | Drugs. 1997; 53(SUPPL 2):40-49                           | non pertinent |
| 8290 | Basler et al.,           | 1997 | Patient education and counseling. 1997; 31(2):113-124    | non pertinent |
| 8291 | Angrilli et al.,         | 1997 | Physiol Behav. 1997; 62(2):391-397                       | non pertinent |
| 8292 | Amr et al.,              | 1997 | Environ Res. 1997; 73(1-2):200-206                       | non pertinent |

|      |                        |      |                                                               |               |
|------|------------------------|------|---------------------------------------------------------------|---------------|
| 8293 | Adler et al.,          | 1997 | Anesth Analg.<br>1997; 84(1):120-126                          | non pertinent |
| 8294 | Zaslansky et al.,      | 1996 | Electroencephalogr Clin Neurophysiol.<br>1996; 100(5):384-391 | non pertinent |
| 8295 | Vogt et al.,           | 1996 | Eur J Neurosci.<br>1996; 8(7):1461-1473                       | non pertinent |
| 8296 | Turk et al.,           | 1996 | J of consulting and clinical psychology. 1996; 64(1):139-146  | non pertinent |
| 8297 | Thurauf et al.,        | 1996 | Br J Clin Pharmacol. 1996; 41(2):115-123                      | non pertinent |
| 8298 | Tanaka et al.,         | 1996 | British j of haematology. 1996; 92(4):795-803                 | non pertinent |
| 8299 | Sviderskaya et al.,    | 1996 | Neurosci Behav Physiol. 1996; 26(6):532-538                   | non pertinent |
| 8300 | Studd et al.,          | 1996 | Clinical drug investigation. 1996; 11(4):205-213              | non pertinent |
| 8301 | Stanley et al.,        | 1996 | J of nervous and mental disease. 1996; 184(9):567-572         | non pertinent |
| 8302 | Sartori et al.,        | 1996 | Cancer. 1996; 78(7):1477-1482                                 | non pertinent |
| 8303 | Sansom et al.,         | 1996 | Clinical and experimental dermatology. 1996; 21(1):33-37      | non pertinent |
| 8304 | Portier et al.,        | 1996 | Medecine ET maladies infectieuses. 1996; 26(12):1188-1193     | non pertinent |
| 8305 | Petersen-Felix et al., | 1996 | British j of anaesthesia. 1996; 77(2):165-171                 | non pertinent |
| 8306 | Pedersen et al.,       | 1996 | Anesthesiology. 1996; 84(5):1020-1026                         | non pertinent |
| 8307 | Parker et al.,         | 1996 | Spine (Phila Pa 1976). 1996; 21(16):1909-1916                 | non pertinent |
| 8308 | Nikolajsen et al.,     | 1996 | Pain. 1996; 67(1):69-77                                       | non pertinent |
| 8309 | McNamara et al.,       | 1996 | Australian dental j. 1996; 41(6):377-387                      | non pertinent |
| 8310 | Madawi et al.,         | 1996 | Spine. 1996; 21(18):2123-2129                                 | non pertinent |
| 8311 | Louvel et al.,         | 1996 | Gut. 1996; 39(5):741-747                                      | non pertinent |
| 8312 | Liu et al.,            | 1996 | Anesthesiology. 1996; 84(1):64-69                             | non pertinent |

|      |                       |      |                                                                      |               |
|------|-----------------------|------|----------------------------------------------------------------------|---------------|
| 8313 | Kubin et al.,         | 1996 | J of photochemistry and photobiology B: biology. 1996; 36(2):103-108 | non pertinent |
| 8314 | Krittayaphong et al., | 1996 | Clin J Pain. 1996; 12(2):126-133                                     | non pertinent |
| 8315 | Kostyunina et al.,    | 1996 | Neurosci Behav Physiol. 1996; 26(4):340-343                          | non pertinent |
| 8316 | Kochs et al.,         | 1996 | Anesthesiology. 1996; 85(2):304-314                                  | non pertinent |
| 8317 | Kinouchi et al.,      | 1996 | J of pharmacy and pharmacology. 1996; 48(3):310-315                  | non pertinent |
| 8318 | Hsieh et al.,         | 1996 | Pain. 1996; 64(2):303-314                                            | non pertinent |
| 8319 | Hommel et al.,        | 1996 | Dermatology (basel, switzerland). 1996; 193(2):127-130               | non pertinent |
| 8320 | Hetem et al.,         | 1996 | Psychopharmacology. 1996; 127(3):276-282                             | non pertinent |
| 8321 | Goodwin               | 1996 | Clinical immunotherapeutics. 1996; 6(5):405-412                      | non pertinent |
| 8322 | Firestone et al.,     | 1996 | Anesthesia and Analgesia. 1996; 82(6):1247-1251                      | non pertinent |
| 8323 | Dowman                | 1996 | Psychophysiology. 1996; 33(4):398-408                                | non pertinent |
| 8324 | Dawson et al.,        | 1996 | J of cranio-maxillo-facial surgery. 1996; 24(3):151-154              | non pertinent |
| 8325 | Cleeland et al.,      | 1996 | Neuropsychopharmacology. 1996; 15(3):252-262                         | non pertinent |
| 8326 | Casey et al.,         | 1996 | J of neurophysiology. 1996; 76(1):571-581                            | non pertinent |
| 8327 | Anton et al.,         | 1996 | Alcohol Alcohol. 1996; 31 Suppl 1:43-53                              | non pertinent |
| 8328 | Kieburtz et al.,      | 1996 | J of neuro-aids. 1996; 1(4):1-5                                      | non pertinent |
| 8329 | Vlaeyen et al.,       | 1995 | The british j of clinical psychology. 1995; 34(1):95-118             | non pertinent |
| 8330 | Vestergaard et al.,   | 1995 | Pain. 1995; 61(2):177-186                                            | non pertinent |
| 8331 | Uchida et al.,        | 1995 | Clinical therapeutics. 1995; 17(3):460-466                           | non pertinent |



|      |                                  |      |                                                                                                                                                         |               |
|------|----------------------------------|------|---------------------------------------------------------------------------------------------------------------------------------------------------------|---------------|
| 8332 | Taniguchi et al.,                | 1995 | Acta<br>anaesthesiologica<br>belgica. 1995;<br>46(2):69-73                                                                                              | non pertinent |
| 8333 | Schonfeld et al.,                | 1995 | Pediatrics. 1995;<br>95(4):480-486                                                                                                                      | non pertinent |
| 8334 | Patat et al.,                    | 1995 | J of clinical<br>pharmacology.<br>1995; 35(6):633-<br>643                                                                                               | non pertinent |
| 8335 | Ono et al.,                      | 1995 | Japanese j of<br>chemotherapy.<br>1995; 43(2):222-<br>230                                                                                               | non pertinent |
| 8336 | Nordin et al.,                   | 1995 | J of physiology.<br>1995; 489(3):885-<br>894                                                                                                            | non pertinent |
| 8337 | Nienaber et al.,                 | 1995 | Circulation. 1995;<br>92(6):1465-1472                                                                                                                   | non pertinent |
| 8338 | Morgan et al.,                   | 1995 | Biol Psychiatry.<br>1995; 38(6):378-<br>385                                                                                                             | non pertinent |
| 8339 | Mini et al.,                     | 1995 | Int J<br>Psychophysiol.<br>1995; 19(1):67-77                                                                                                            | non pertinent |
| 8340 | Lötsch et al.,                   | 1995 | British j of<br>pharmacology.<br>1995; 40(6):545-<br>552                                                                                                | non pertinent |
| 8341 | Isaia et al.,                    | 1995 | Minerva medica.<br>1995; 86(3):101-<br>104                                                                                                              | non pertinent |
| 8342 | Ilyuchina et al.,                | 1995 | Alcohol<br>(Fayetteville,<br>N.Y.). 1995;<br>12(6):511-517                                                                                              | non pertinent |
| 8343 | Hartvig et al.,                  | 1995 | Clin Pharmacol<br>The. 1995;<br>58(2):165-173                                                                                                           | non pertinent |
| 8344 | Gronemeyer et<br>al.,            | 1995 | Wiener<br>medizinische<br>wochenschrift<br>(1946). 1995;<br>145(6):129-139                                                                              | non pertinent |
| 8345 | Goddard et al.,                  | 1995 | Biol Psychiatry.<br>1995; 38(2):74-85                                                                                                                   | non pertinent |
| 8346 | Gamzu Elkan<br>Pradalier et al., | 1995 | 8th-ecnp-<br>(european-college-<br>of-<br>neuropsychophar-<br>macology)-<br>congress,-venice,-<br>italy: pathologie<br>biologie. 1995;<br>43(9):806-813 | non pertinent |
| 8347 | Frederikson et al.,              | 1995 | Psychophysiology.<br>1995; 32(1):43-48                                                                                                                  | non pertinent |
| 8348 | Foy et al.,                      | 1995 | European heart j.<br>1995; 16(6):770-<br>778                                                                                                            | non pertinent |
| 8349 | Devulder et al.,                 | 1995 | Clin J Pain. 1995;<br>11(2):147-150                                                                                                                     | non pertinent |
| 8350 | Daidsson et al.,                 | 1995 | Current medical<br>research and<br>opinion. 1995;<br>13(5):285-297                                                                                      | non pertinent |

|      |                    |      |                                                                        |               |
|------|--------------------|------|------------------------------------------------------------------------|---------------|
| 8351 | Canavero et al.,   | 1995 | J Neurol. 1995; 242(9):561-567                                         | non pertinent |
| 8352 | Cagnolati et al.,  | 1995 | Revista brasileira de anestesiologia. 1995; 45(4):215-223              | non pertinent |
| 8353 | Bruck et al.,      | 1995 | Child development. 1995; 66(1):193-208                                 | non pertinent |
| 8354 | Bromm et al.,      | 1995 | Electroencephalography and clinical neurophysiology. 1995; 95(1):14-26 | non pertinent |
| 8355 | Bergmann et al.,   | 1995 | Gastroenterologie clinique ET biologique. 1995; 19(5):482-486          | non pertinent |
| 8356 | Bergdahl et al.,   | 1995 | J of oral pathology & medicine. 1995; 24(5):213-215                    | non pertinent |
| 8357 | Bakker et al.,     | 1995 | J Rheumatol. 1995; 22(7):1304-1310                                     | non pertinent |
| 8358 | Arnold             | 1995 | J of abnormal child physiology. 1995; 23(1):125-140                    | non pertinent |
| 8359 | Aldrete et al.,    | 1995 | Reg Anesth. 1995; 20(1):75-79                                          | non pertinent |
| 8360 | No authors listed  | 1995 | Advances in therapy. 1995; 12(5):313-320                               | non pertinent |
| 8361 | Wagner et al.,     | 1994 | Acta Radiol. 1994; 35(2):182-185                                       | non pertinent |
| 8362 | Van Dyck et al.,   | 1994 | Psychiatry research. 1994; 55(4):181-191                               | non pertinent |
| 8363 | Triano et al.,     | 1994 | J of manipulative and physiological therapeutics. 1994; 4(17):291      | non pertinent |
| 8364 | Thurauf et al.,    | 1994 | Br J Clin Pharmacol. 1994; 38(6):545-555                               | non pertinent |
| 8365 | Shima et al.,      | 1994 | Japanese pharmacology and therapeutics. 1994; 22(SUPPL 4):75-95        | non pertinent |
| 8366 | Satku et al.,      | 1994 | Annals of the academy of medicine, singapore. 1994; 23(6):828-831      | non pertinent |
| 8367 | Post et al.,       | 1994 | Ep Brain Res. 1994; 100(1):107-120                                     | non pertinent |
| 8368 | Pfenninger et al., | 1994 | Der Anaesthesist. 1994; 43(Suppl 2):68-75                              | non pertinent |

|      |                    |      |                                                                                |               |
|------|--------------------|------|--------------------------------------------------------------------------------|---------------|
| 8369 | McCann et al.,     | 1994 | Anxiety. 1994; 1(6):258-267                                                    | non pertinent |
| 8370 | Lucker et al.,     | 1994 | International j of clinical pharmacology and therapeutics. 1994; 32(8):409-414 | non pertinent |
| 8371 | Kollerup et al.,   | 1994 | Calcified tissue international. 1994; 54(1):12-15                              | non pertinent |
| 8372 | Kempenaers et al., | 1994 | Neuropsychobiology. 1994; 30(2-3):66-72                                        | non pertinent |
| 8373 | Ilacqua            | 1994 | Headache. 1994; 34(2):99-102                                                   | non pertinent |
| 8374 | Hotta et al.,      | 1994 | Clinical therapeutics. 1994; 16(6):1007-1015                                   | non pertinent |
| 8375 | Hilz et al.,       | 1994 | Muscle Nerve. 1994; 17(12):1456-1460                                           | non pertinent |
| 8376 | He et al.,         | 1994 | Pain. 1994; 59(1):55-63                                                        | non pertinent |
| 8377 | Hasenfratz et al., | 1994 | Psychopharmacology. 1994; 114(2):281-287                                       | non pertinent |
| 8378 | Guinsburg et al.,  | 1994 | J de pediatria. 1994; 70(2):82-90                                              | non pertinent |
| 8379 | Girardi et al.,    | 1994 | Minerva Anesthesiologica. 1994; 60(6):321-328                                  | non pertinent |
| 8380 | Fredman et al.,    | 1994 | Anesth Analg. 1994; 79(1):75-79                                                | non pertinent |
| 8381 | Dordoni et al.,    | 1994 | Anaesthesia. 1994; 49(12):1046-1049                                            | non pertinent |
| 8382 | Doenicke et al.,   | 1994 | Anesth Analg. 1994; 79(5):933-939                                              | non pertinent |
| 8383 | De et al.,         | 1994 | Annales medicale de nancy ET de l'est. 1994; 33(2):113-117                     | non pertinent |
| 8384 | Davis et al.,      | 1994 | Pain. 1994; 59(2):189-199                                                      | non pertinent |
| 8385 | Creamer et al.,    | 1994 | Osteoarthritis Cartilage. 1994; 2(2):133-140                                   | non pertinent |
| 8386 | Brückle et al.,    | 1994 | Clinical rheumatology. 1994; 13(2):209-216                                     | non pertinent |
| 8387 | Blyth et al.,      | 1994 | British j of rheumatology. 1994; 33(5):461-463                                 | non pertinent |
| 8388 | Beck et al.,       | 1994 | J of consulting and clinical psychology. 1994; 62(4):818-826                   | non pertinent |

|      |                    |      |                                                                  |               |
|------|--------------------|------|------------------------------------------------------------------|---------------|
| 8389 | Vaupel et al.,     | 1993 | J Pharmacol Exp Ther. 1993; 267(3):1386-1394                     | non pertinent |
| 8390 | Schwender et al.,  | 1993 | Der Anaesthesist. 1993; 42(9):583-591                            | non pertinent |
| 8391 | Rossi et al.,      | 1993 | Rivista di neuroradiologia. 1993; 6(4):445-452                   | non pertinent |
| 8392 | Peduzzi et al.,    | 1993 | Stat Med. 1993; 12(13):1185-1195                                 | non pertinent |
| 8393 | Mössner            | 1993 | Digestion. 1993; 54 Suppl 2:35-39                                | non pertinent |
| 8394 | Morse et al.,      | 1993 | Int J Psychosom. 1993; 40(1-4):68-76                             | non pertinent |
| 8395 | Morgan et al.,     | 1993 | Psychopharmacology (Berl). 1993 110(3):342-346                   | non pertinent |
| 8396 | King et al.,       | 1993 | Anesthesia and Analgesia. 1993; 77(1):84-88                      | non pertinent |
| 8397 | Jerosch et al.,    | 1993 | Knee surgery, sports traumatology, arthroscopy. 1993; 1(2):80-84 | non pertinent |
| 8398 | Hasenfratz et al., | 1993 | psychopharmacology. 1993; 113(1):37-44                           | non pertinent |
| 8399 | Goddard et al.,    | 1993 | Psychiatry Res. 1993; 48(2):119-133                              | non pertinent |
| 8400 | Borkovec et al.,   | 1993 | Behavior research and therapy. 1993; 31(3):321-324               | non pertinent |
| 8401 | Bischoff et al.,   | 1993 | Der Anaesthesist. 1993; 42(3):142-148                            | non pertinent |
| 8402 | Wigley et al.,     | 1992 | J of rheumatology. 1992; 19(9):1407-1414                         | non pertinent |
| 8403 | Veerasarn et al.,  | 1992 | Pain. 1992; 49(3):349-360                                        | non pertinent |
| 8404 | Sevarino et al.,   | 1992 | J Clin Anesth. 1992; 4(4):285-288                                | non pertinent |
| 8405 | Pietrowsky et al., | 1992 | Psychopharmacology. 1992; 107(1):50-54                           | non pertinent |
| 8406 | Mazieres et al.,   | 1992 | Rev rheum mal osteo-articulaires. 1992; 59(7-8):466-472          | non pertinent |
| 8407 | Maier et al.,      | 1992 | Der radiologe. 1992; 32(8):393-396                               | non pertinent |
| 8408 | Klement et al.,    | 1992 | Pain. 1992; 48(2):269-274                                        | non pertinent |

|      |                      |      |                                                                           |               |
|------|----------------------|------|---------------------------------------------------------------------------|---------------|
| 8409 | De Vlieger et al.,   | 1992 | Diagnostic microbiology and infectious disease. 1992; 15(4 Suppl):123-127 | non pertinent |
| 8410 | Choi et al.,         | 1992 | Taehan kanho (Korean nurse). 1992; 31(4):77-99                            | non pertinent |
| 8411 | Aranda et al.,       | 1992 | Arzneim.-Forsch. Drug res. 42(11 A):1406-1409                             | non pertinent |
| 8412 | Woods et al.,        | 1991 | Psychiatry Res. 1991; 36(2):115-127                                       | non pertinent |
| 8413 | Treves et al.,       | 1991 | Rev rhum mal osteo-articulaires. 1991; 58(7):549-552                      | non pertinent |
| 8414 | Sinatra et al.,      | 1991 | J Clin Anesth. 1991; 3(3):219-224                                         | non pertinent |
| 8415 | Sienra-Pérez et al., | 1991 | Archivos del instituto de cardiologia de mexico. 1991; 61(4):365-373      | non pertinent |
| 8416 | Sevarino et al.,     | 1991 | Can J Anaesth. 1991; 38(4 Pt 1):450-453                                   | non pertinent |
| 8417 | Russell et al.,      | 1991 | Behaviour research and therapy. 1991; 29(2):191-196                       | non pertinent |
| 8418 | Reynolds et al.,     | 1991 | J Rheumatol. 1991; 18(3):452-454                                          | non pertinent |
| 8419 | Pochobradsky et al., | 1991 | Drugs under experimental and clinical research. 1991; 17(3):197-204       | non pertinent |
| 8420 | Loubser et al.,      | 1991 | Paraplegia. 1991; 29(1):25-36                                             | non pertinent |
| 8421 | Heller et al.,       | 1991 | Medical j of Australia. 1991; 155(5):329-332                              | non pertinent |
| 8422 | Grabow et al.,       | 1991 | Klinische wochenschrift. 1991; 69 Suppl 26:100-103                        | non pertinent |
| 8423 | Floris et al.,       | 1991 | Int j clin pharmacol ther toxicol. 1991; 29(4):139-143                    | non pertinent |
| 8424 | El-Hadid et al.,     | 1991 | J of international medical research. 1991; 19(3):219-227                  | non pertinent |
| 8425 | Cinnamon et al.,     | 1991 | AJNR. American j of neuroradiology. 1991; 12(6):1099-1103                 | non pertinent |
| 8426 | Cherkin et al.,      | 1991 | Spine. 1991; 16(10):1168-1172                                             | non pertinent |

|      |                        |      |                                                              |               |
|------|------------------------|------|--------------------------------------------------------------|---------------|
| 8427 | Cassell et al.,        | 1991 | J of antimicrobial chemotherapy. 1991; 27(Suppl A):47-59     | non pertinent |
| 8428 | Bromm et al.,          | 1991 | Arzneimittel-forschung. 1991; 41(11):1123-1129               | non pertinent |
| 8429 | Arendt-Nielsen et al., | 1991 | Acta anaesthesiologica Scandinavica. 1991; 35(1):24-29       | non pertinent |
| 8430 | Zachariae et al.,      | 1990 | Archives of dermatological research. 1990; 282(8):539-543    | non pertinent |
| 8431 | Yonemura et al.,       | 1990 | Masui. The japanese j of anesthesiology. 1990; 39(4):478-486 | non pertinent |
| 8432 | Wiedermann et al.,     | 1990 | Vaccine. 1990; 8(6):581-584                                  | non pertinent |
| 8433 | Hale et al.,           | 1990 | Archives of sexual behavior. 1990; 19(6):569-581             | non pertinent |
| 8434 | Goodman et al.,        | 1990 | Arch Gen Psychiatry. 1990; 47(6):577-585                     | non pertinent |
| 8435 | Doenicke et al.,       | 1990 | Der Anaesthesist. 1990; 39(10):475-480                       | non pertinent |
| 8436 | Copp et al.,           | 1990 | J Clin Psychopharmacol. 1990; 10(3 Suppl):52-60              | non pertinent |
| 8437 | Borkovec et al.,       | 1990 | Behaviour research and therapy. 1990; 28(1):69-73            | non pertinent |
| 8438 | Westenberg et al.,     | 1989 | Psychopathology. 1989; 22 Suppl 1:68-77                      | non pertinent |
| 8439 | Valtonen               | 1989 | Acta Anaesthesiol Scand. 1989; 33(2):170-173                 | non pertinent |
| 8440 | Stuttman et al.,       | 1989 | Der Anaesthesist. 1989; 38(8):421-423                        | non pertinent |
| 8441 | Smith et al.,          | 1989 | Pediatrics. 1989; 84(2):290-295                              | non pertinent |
| 8442 | Ringe                  | 1989 | Clinical rheumatology. 1989; 8 Suppl 2; 109-115              | non pertinent |
| 8443 | Portenoy et al.,       | 1989 | Cancer. 1989; 63(11 Suppl):2284-2288                         | non pertinent |
| 8444 | Lichstein et al.,      | 1989 | Behaviour research and therapy. 1989; 27(5):569-572          | non pertinent |
| 8445 | Leigh et al.,          | 1989 | Clinical rheumatology. 1989; 8(4):489-493                    | non pertinent |

|      |                  |      |                                                                         |               |
|------|------------------|------|-------------------------------------------------------------------------|---------------|
| 8446 | Johnson et al.,  | 1989 | Headache. 1989;<br>29(6):358-365                                        | non pertinent |
| 8447 | Hauri et al.,    | 1989 | Sleep. 1989;<br>12(4):323-337                                           | non pertinent |
| 8448 | Egger et al.,    | 1989 | J of pediatrics.<br>1989; 114(1):51-58                                  | non pertinent |
| 8449 | Dettori et al.,  | 1989 | Angiology. 1989;<br>40(4 Pt 1):237-248                                  | non pertinent |
| 8450 | Charney et al.,  | 1989 | Psychiatry Res.<br>1989; 27(2):173-182                                  | non pertinent |
| 8451 | Arnold et al.,   | 1989 | Fortschritte der<br>medizin. 1989;<br>107(21):43-46                     | non pertinent |
| 8452 | Uhde et al.,     | 1988 | Am J Psychiatry.<br>1988; 145(9):1104-1109                              | non pertinent |
| 8453 | Rösch            | 1988 | Drugs. 1988; 35<br>Suppl 3:127-133                                      | non pertinent |
| 8454 | Miltner et al.,  | 1988 | Pain. 1988;<br>35(2):205-213                                            | non pertinent |
| 8455 | Micieli et al.,  | 1988 | Headache. 1988;<br>28(3):196-200                                        | non pertinent |
| 8456 | Matejcek et al., | 1988 | Neuropsychobiolo<br>gy. 1988;<br>19(4):202-211                          | non pertinent |
| 8457 | Valdes et al.,   | 1987 | European j of<br>neurology and<br>inflammation.<br>1987; 9(1-2):133-136 | non pertinent |
| 8458 | Pohl et al.,     | 1987 | Biol Psychiatry.<br>1987; 22(9):1127-1136                               | non pertinent |
| 8459 | Jaffe et al.,    | 1987 | International j of<br>cardiology. 1987;<br>15(1):77-89                  | non pertinent |
| 8460 | Davidoff et al., | 1987 | Pain. 1987;<br>29(2):151-161                                            | non pertinent |
| 8461 | Szekely et al.,  | 1986 | Headache. 1986;<br>26(2):86-92                                          | non pertinent |
| 8462 | Knott et al.,    | 1986 | Neuropsychobiolo<br>gy; 1986; 16(1):9-14                                | non pertinent |
| 8463 | Hijzen et al.,   | 1986 | J of oral<br>rehabilitation.<br>1986; 13(6):529-539                     | non pertinent |
| 8464 | Bromm et al.,    | 1986 | Pain. 1986;<br>25(2):245-257                                            | non pertinent |
| 8465 | Bromm et al.,    | 1986 | Neuropsychobiolo<br>gy. 1986; 16(2-3):152-156                           | non pertinent |
| 8466 | Schwartz         | 1985 | Am J Emerg Med.<br>1985; 3(1):1-10                                      | non pertinent |
| 8467 | Saletu et al.,   | 1985 | J Clin Psychiatry.<br>1985; 46(3 Pt 2):45-52                            | non pertinent |
| 8468 | Velasco et al.,  | 1984 | Neuropharmacolo<br>gy. 1984;<br>23(8):931-938                           | non pertinent |
| 8469 | Thomas           | 1984 | Aust NZ j med<br>suppl. 1984; 14(3<br>Suppl 1):349                      | non pertinent |

|      |                    |      |                                                                        |               |
|------|--------------------|------|------------------------------------------------------------------------|---------------|
| 8470 | Stacher et al.,    | 1983 | Br J Clin Pharmacol. 1983; 16(2):149-156                               | non pertinent |
| 8471 | Mc Cauley et al.,  | 1983 | Archives of physical medicine and rehabilitation. 1983; 64(11):548-552 | non pertinent |
| 8472 | Large et al.,      | 1983 | Pain. 1983; 17(2):167-177                                              | non pertinent |
| 8473 | Janssen            | 1983 | J Psychosom Res. 1983; 27(3):243-253                                   | non pertinent |
| 8474 | Stacher et al.,    | 1982 | Peptides. 1982; 3(6):955-962                                           | non pertinent |
| 8475 | Feuerstein et al., | 1982 | J-psychoso-res. 1982; 26(2):167-182                                    | non pertinent |
| 8476 | Sebastian et al.,  | 1981 | J of research in personality. 1981; 15(3)                              | non pertinent |
| 8477 | Willer et al.,     | 1980 | Brain Res. 1980; 198(2):419-426                                        | non pertinent |
| 8478 | Schlutter et al.,  | 1980 | British j of medical psychology. 1980; 53(1):47-52                     | non pertinent |
| 8479 | Newman et al.,     | 1980 | Cognitive therapy and research. 1980; 4(4):397-407                     | non pertinent |
| 8480 | Melzack et al.,    | 1980 | Canadian medical association j. 1980; 2(122):189-191                   | non pertinent |
| 8481 | Melzack et al.,    | 1980 | Pain. 1980; 9(2):209-217                                               | non pertinent |
| 8482 | Stacher et al.,    | 1979 | Pain. 1979; 7(2):159-172                                               | non pertinent |
