# Supplementary material for: Functional Changes in Brain Activity Using Hypnosis: A Systematic Review
Source: MDPI journal article supplement (doi:10.3390/brainsci12010108), 2022-01-13
Supplement: s1 [file s1]

## Quality Assessment

| ID | Author              | Sources                                                                          | Type of study      | Method                  | Oral conditions    | Quality Assessment |
|----|---------------------|----------------------------------------------------------------------------------|--------------------|-------------------------|--------------------|--------------------|
| 1  | London et al.,      | Nature. <b>1968</b> ; 219(6):71-72                                               | Observ. Study      | EEG                     | No oral conditions | Fair               |
| 2  | Hart                | Nature. <b>1970</b> ; 227(19):1261-1262                                          | CCS                | EEG                     | No oral conditions | Good               |
| 3  | Morgan et al.,      | Psychophysiology. <b>1974</b> ; 11(2):275-276                                    | Observ. Study      | EEG                     | No oral conditions | Poor               |
| 4  | Tebecis et al.,     | The J of Nervous and Mental Disease. <b>1975</b> ; 161(1):1-16                   | CCS                | EEG                     | No oral conditions | Fair               |
| 5  | Zachariae et al.,   | International J of Clinical and Experimental Hypnosis <b>1994</b> , 42(1), 56-80 | CSS                | Argon Laser             | No oral conditions | Fair               |
| 6  | Graffin et al.,     | J of abnormal Psychology. <b>1995</b> ; 104(1):123-131                           | Comparative Study  | EEG                     | No oral conditions | Good               |
| 7  | De Pascalis et al., | Int J Psychophysiol <b>1996</b> , 21(1996), 163-175                              | CSS                | EEG                     | No oral conditions | Fair               |
| 8  | De Pascalis et al., | Int J of Psychophysiology. <b>1998</b> ; 29(1998):255-275                        | COS                | EEG                     | No oral conditions | Fair               |
| 9  | Maquet et al.,      | Society of Biological Psychiatry. <b>1999</b> ; 45, 327-333                      | Case-Control Study | PET                     | No oral conditions | Fair               |
| 10 | Rainville et al.,   | J of Cognitive Neuroscience. <b>1999</b> ; 11(1):110-125                         | Observ. Study      | EEG, PET                | No oral conditions | Fair               |
| 11 | Faymonville et al., | Anesthesiology <b>2000</b> , 92(5), 1257-1267                                    | CSS                | PET                     | No oral conditions | Fair               |
| 12 | Freeman et al.,     | American J of Clinical Hypnosis <b>2000</b> , 43(2), 137-148                     | CSS                | EEG                     | No oral conditions | Good               |
| 13 | De Pascalis et al., | Clin Neurophysiol <b>2001</b> , 112(8), 1475-1485                                | CCS                | rCBF + EEG              | No oral conditions | Good               |
| 14 | Friedrich et al.,   | Psychophysiology <b>2001</b> , 38(5), 768-771                                    | CSS                | Thulium YAG Laser + EEG | No oral conditions | Fair               |
| 15 | Isotani et al.,     | Neuropsychobiology. <b>2001</b> ; 44:192-198                                     | Pilot Study        | EEG                     | No oral conditions | Fair               |
| 16 | Willumsen et al.,   | Acta Odontol Scand <b>2001</b> , 59(6), 335-340                                  | RCS                | Cognitive Therapy       | Dental fear        | Good               |
| 17 | De Pascalis et al., | Pain. <b>2004</b> ; 112:27-36                                                    | Observ. Cohort     | EEG                     | No oral conditions | Good               |
| 18 | Harandi et al.,     | Contemporary hypnosis <b>2004</b> , 21(1), 28-34                                 | RCT                | Hypnosis                | No oral conditions | Poor               |
| 19 | Wager et al.,       | Science (New York, N.Y.) <b>2004</b> , 303(5661), 1162-                          | CCS                | fMRI                    | No oral conditions | Poor               |

|    |                        |                                                                                   |                                   |                                                                                                                                    |                                   |      |
|----|------------------------|-----------------------------------------------------------------------------------|-----------------------------------|------------------------------------------------------------------------------------------------------------------------------------|-----------------------------------|------|
|    |                        | 1167                                                                              |                                   |                                                                                                                                    |                                   |      |
| 20 | Egner et al.,          | NeuroImage. <b>2005</b> ; 27:969-978<br>Ann Behav Med                             | Observ. Cohort                    | EEG, fMRI                                                                                                                          | No oral conditions                | Fair |
| 21 | Milling et al.,        | <b>2005</b> , 29(2), 116-127                                                      | CSS                               | Hypnosis                                                                                                                           | No oral conditions                | Good |
| 22 | Batty et al.,          | Brain Res Bull, <b>2006</b> , 71(1-3), 83-90                                      | RCT                               | EEG                                                                                                                                | No oral conditions                | Fair |
| 23 | Eitner et al.,         | Intl J of Clinical and Experimental Hypnosis. <b>2006</b> ; 54(4):457-479         | Comp. Interdiscip. Clinical Study | EEG, ECG, heart rate, blood pressure, blood oxygen saturation, respiration rate, salivary cortisol concentration, body temperature | Oral and maxillofacial treatments | Good |
| 24 | Saadat et al.,         | Anesthesia and Analgesia <b>2006</b> , 102(5), 1394-1396                          | RCT                               | Hypnosis                                                                                                                           | No oral conditions                | Good |
| 25 | Milling et al.,        | Ann Behav Med <b>2007</b> , 33(2), 167-178                                        | RCT                               | Hypnosis + cognitive-behavioral treatment                                                                                          | No oral conditions                | Fair |
| 26 | De Pascalis et al.,    | Pain. <b>2008</b> ; 134(2008):197-208                                             | CCS                               | EEG                                                                                                                                | No oral conditions                | Fair |
| 27 | Marc et al.,           | J Womens Health (Larchmt) <b>2009</b> , 18(9): 1441-1447                          | RCT                               | Hypnosis                                                                                                                           | No oral conditions                | Good |
| 28 | Vanhaudenhuyse et al., | Neuroimage <b>2009</b> , 47(3), 1047-1054                                         | CSS                               | Thulium YAG laser fMRI                                                                                                             | No oral conditions                | Good |
| 29 | Krummenacher,          | Schmerz (berlin, germany) <b>2010</b> , 148(3). 368-374                           | CCS                               | rTMS                                                                                                                               | No oral conditions                | Poor |
| 30 | Miltner et al.,        | International J of Psychophysiology <b>2010</b> , 77(3), 206-238                  | Article                           | EEG                                                                                                                                | No oral conditions                | Poor |
| 31 | Brockardt et al.,      | Pain <b>2011</b> , 152(1), 182-187                                                | RCS                               | rTMS                                                                                                                               | No oral conditions                | Good |
| 32 | Pyka et al.,           | NeuroImage. <b>2011</b> ; 56(2011), 2173-2182                                     | CT                                | fMRI                                                                                                                               | No oral condition                 | Poor |
| 33 | Trehune et al.,        | Psychophysiology <b>2011</b> ; 48(2011):1444-1447                                 | Case-Control Study                | EEG                                                                                                                                | No oral conditions                | Poor |
| 34 | Zeidan et al.,         | J Neurosci <b>2011</b> , 31(14): 5540-5547                                        | RCS                               | MRI                                                                                                                                | No oral conditions                | Good |
| 35 | Stein et al.,          | Pain <b>2012</b> , 153(11), 2210-2217                                             | CCS                               | DTI, MRI                                                                                                                           | No oral conditions                | Good |
| 36 | Hilbert et al.,        | BioMed Research International. <b>2013</b> ;                                      | Case-Control Study                | fMRI                                                                                                                               | Dental phobia                     | Good |
| 37 | Williams et al.,       | The International J of Clinical and Experimental Hypn <b>2014</b> , 58(1), 82-101 | Observational Study               | EEG                                                                                                                                | No oral conditions                | Good |
| 38 | Dufresne et al.,       | Pain Med <b>2014</b> , 15(12), 2055-2063.                                         | RCT                               | Hypnosis                                                                                                                           | No oral conditions                | Fair |
| 39 | Jensen et al.,         | J of Physiology. <b>2015</b> ; 109:131-142                                        | RCT                               | EEG                                                                                                                                | No oral conditions                | Fair |
| 40 | Halsband et al.,       |                                                                                   | CCS                               | fMRI                                                                                                                               | Dental phobia                     | Good |

|    |                     |                                                                               |                        |               |                    |      |
|----|---------------------|-------------------------------------------------------------------------------|------------------------|---------------|--------------------|------|
| 41 | De Pascalis et al., | <i>PLoS One</i> <b>2016</b> ,<br>11(8)                                        | Research               | EEG, EMG, EOG | No oral conditions | Good |
| 42 | Jiang et al.,       | <i>Cerebral Cortex</i><br><b>2016</b> , 2016, 1-11                            | Observational<br>Study | fMRI          | No oral conditions | Good |
| 43 | Williams et al.,    | <i>Contemporary<br/>Clinical Trials</i> ,<br><b>2020</b> ;<br>90(2020):105935 | RCT                    | EEG           | No oral conditions | Good |
